# Supplementary material
Source: PubMed Central journal article supplement (PMC6713272)

# Supplementary Data 1

## LocusZoom plots

---

Genome-wide association analyses of risk tolerance and risky behaviors in over one million individuals identify hundreds of loci and shared genetic influences

Correspondence to:

[jonathan.pierre.beauchamp@gmail.com](mailto:jonathan.pierre.beauchamp@gmail.com) or

[r.karlssonlinner@vu.nl](mailto:r.karlssonlinner@vu.nl)

**LocusZoom plots for the GWAS of general risk tolerance ( $n = 939,908$ ), adventurousness ( $n = 557,923$ ), automobile speeding propensity ( $n = 404,291$ ), drinks per week ( $n = 414,343$ ), ever smoker ( $n = 518,633$ ), number of sexual partners ( $n = 370,711$ ), and the first PC of the risky behaviors ( $n = 315,894$ ).** Each plot corresponds to one locus. Plots are grouped together by phenotype and are ordered by the genomic positions of the loci.

In each plot, the  $x$ -axis shows each SNP's chromosomal position (in Mb), and the  $y$ -axis shows each SNP's GWAS  $P$  value (and not its GCTA (COJO)  $P$  value) on a  $-\log_{10}$  scale (based on a two-tailed  $z$ -test). The horizontal dashed line marks the threshold for genome-wide significance ( $P = 5 \times 10^{-8}$ ). Genes contained in the locus are plotted below the main plot area. The locus is denoted by a grey rectangle in this area. A flank region of 250Kb on each side of the locus is also plotted.

Each approximately independent genome-wide significant association (“lead SNP”) is labeled “Lead”; SNPs that are genome-wide significant in the GCTA (COJO) conditional analysis are labeled “Conditional”; SNPs that are both lead SNPs and significant in the GCTA (COJO) conditional analysis are labeled “Lead & conditional”. All three of these types of “reference SNPs” are marked with a large diamond (◆). For plots with multiple reference SNPs, LD information for each non-reference SNP is plotted with respect to the reference SNP in highest LD with the non-reference SNP.

See **Supplementary Information sections 2.8 and 3.3 and Supplementary Tables 3 and 6** for additional details.

LocusZoom plots for the 99 loci identified  
in the GWAS of general risk tolerance

---

# General risk tolerance: locus 1 [chr 1:21.046–21.535Mb]

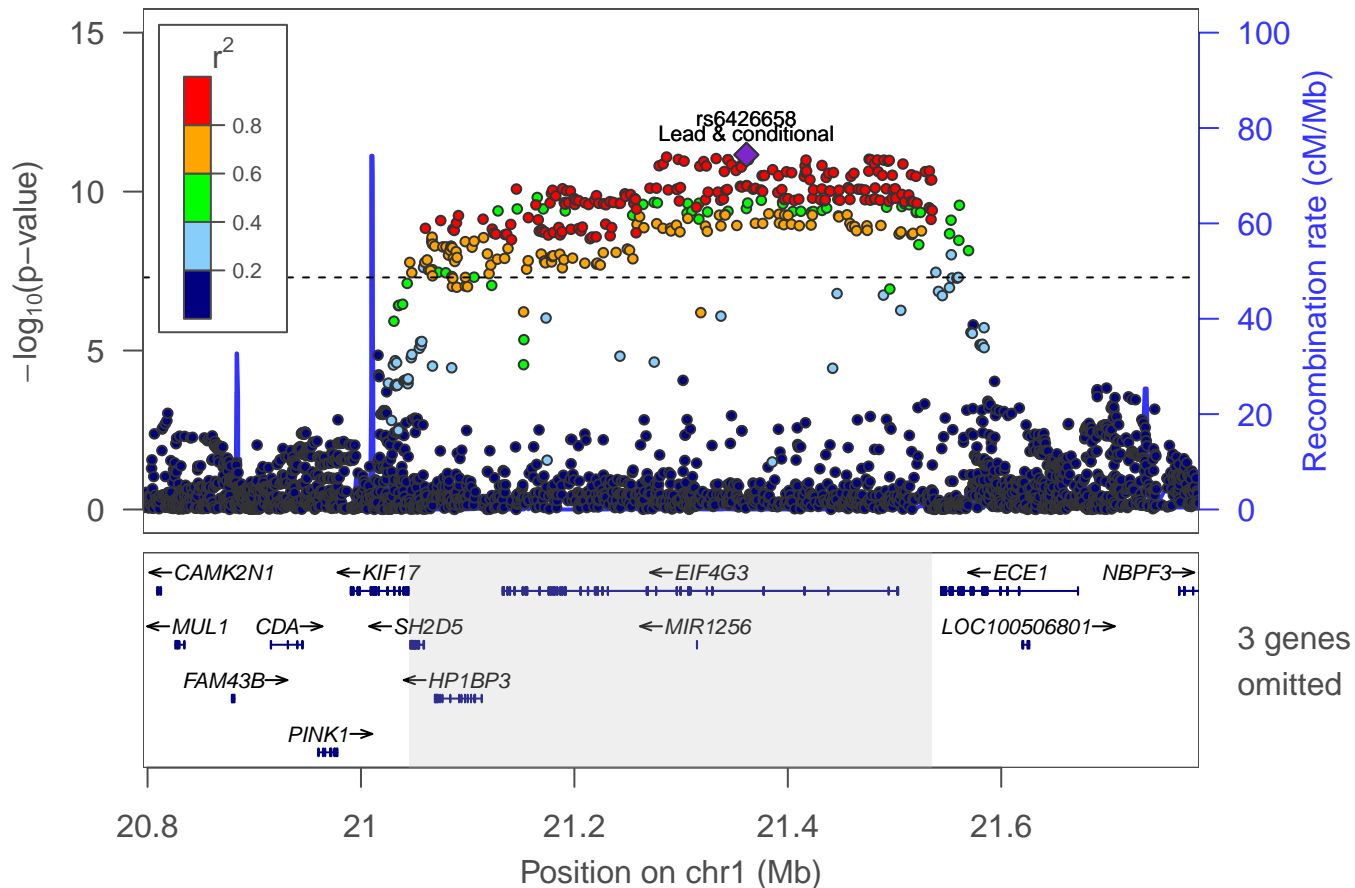

# General risk tolerance: locus 2 [chr 1:33.776–33.916Mb]

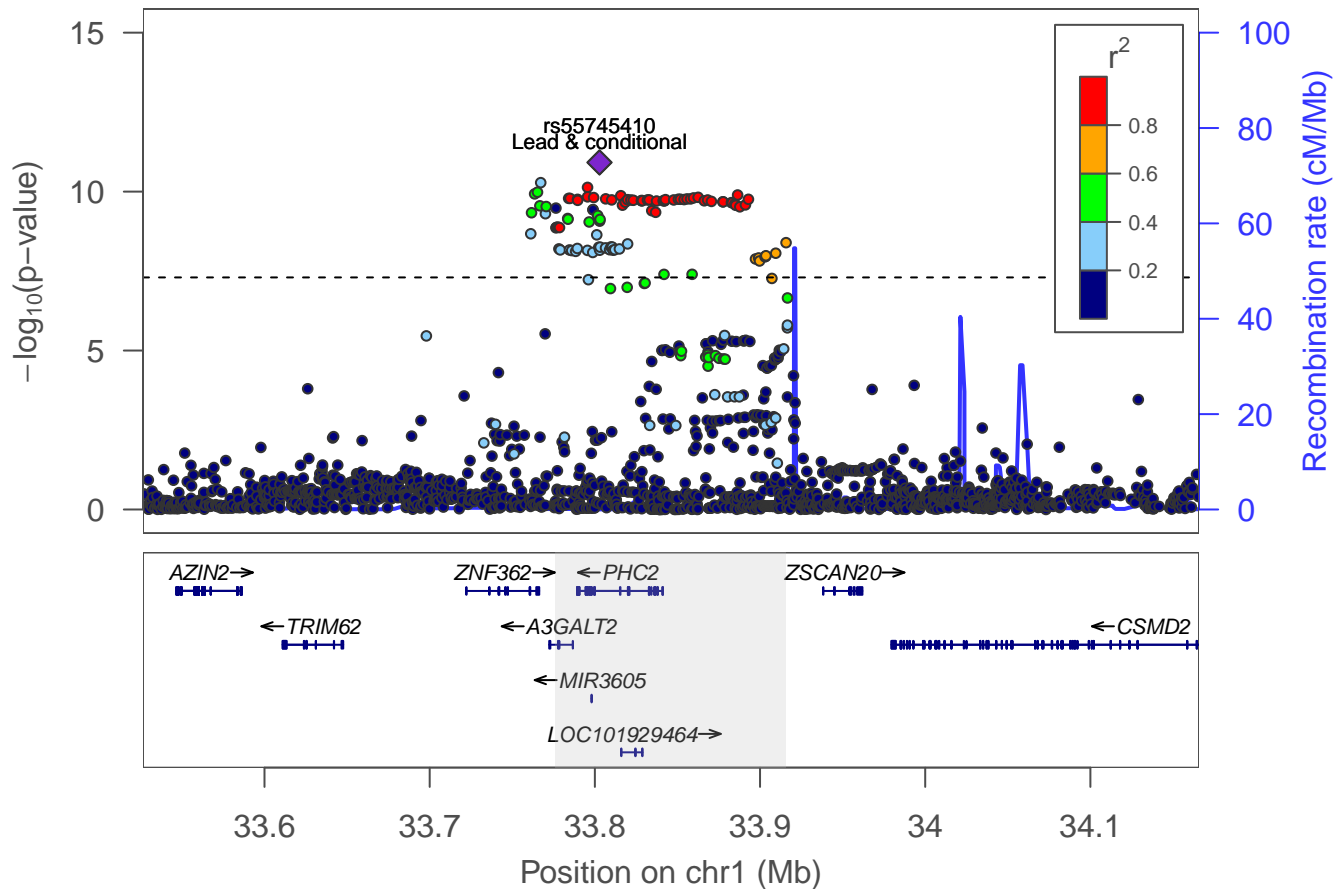

# General risk tolerance: locus 3 [chr 1:42.357–42.558Mb]

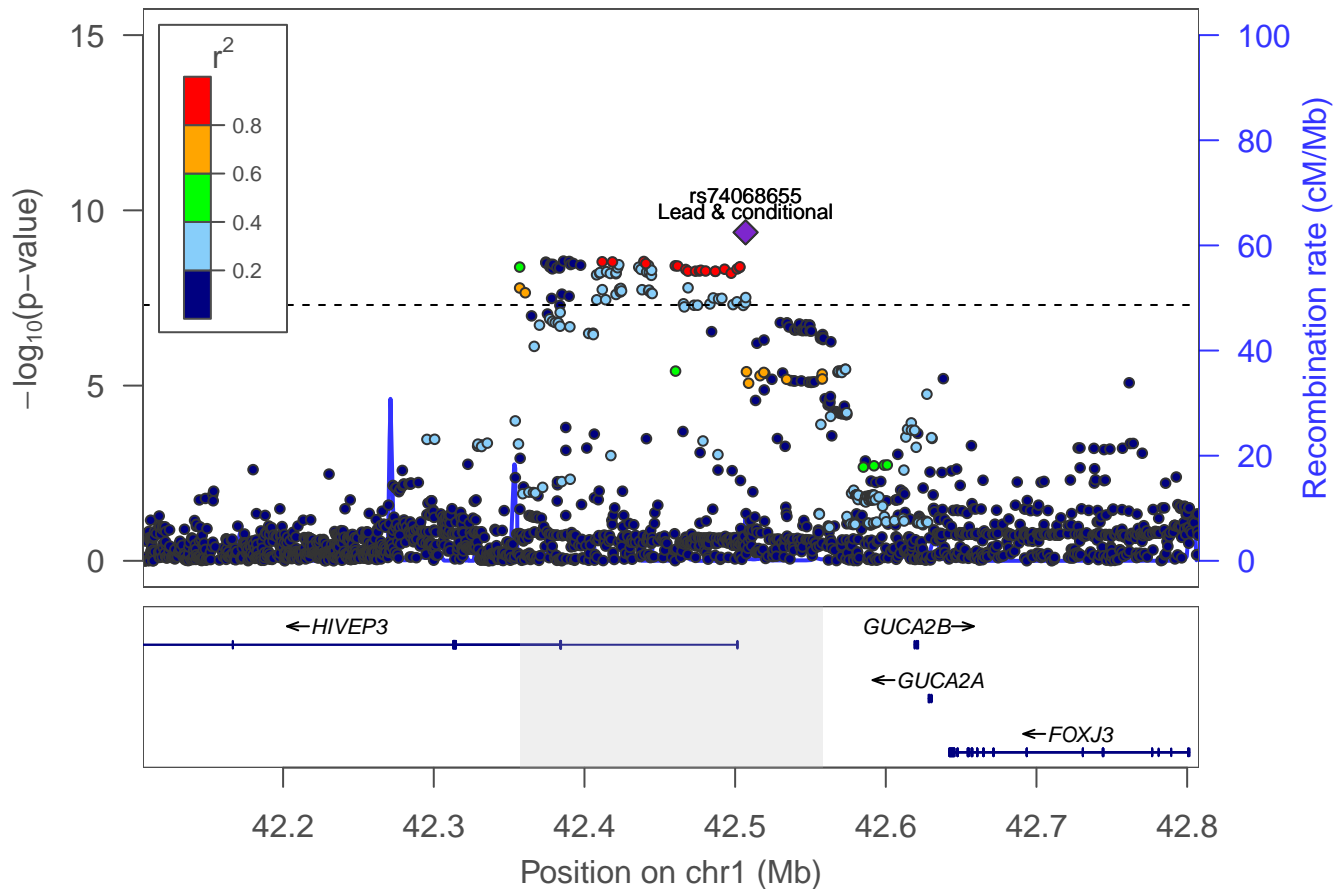

# General risk tolerance: locus 4 [chr 1:88.744–88.864Mb]

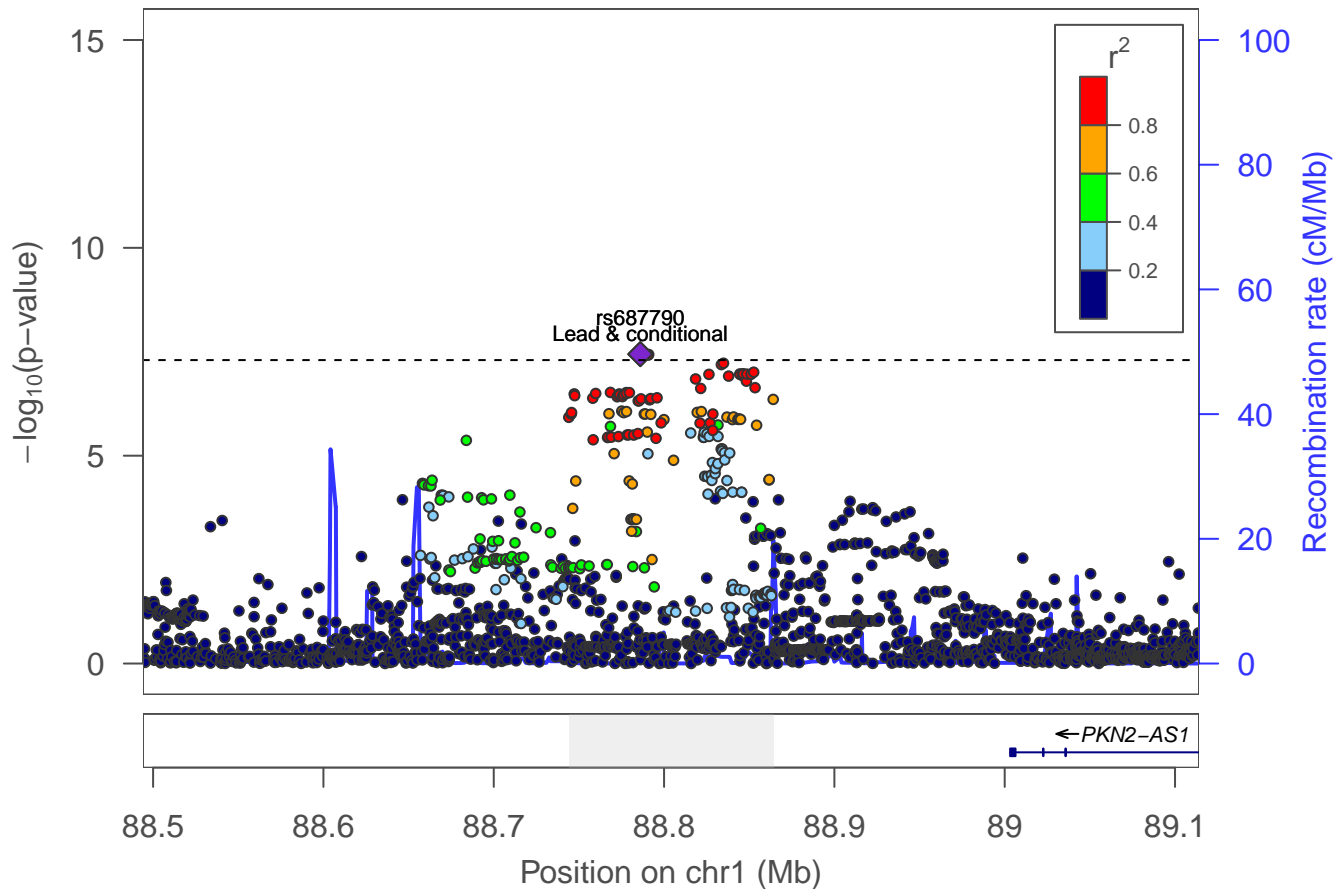

# General risk tolerance: locus 5 [chr 1:96.357–96.450Mb]

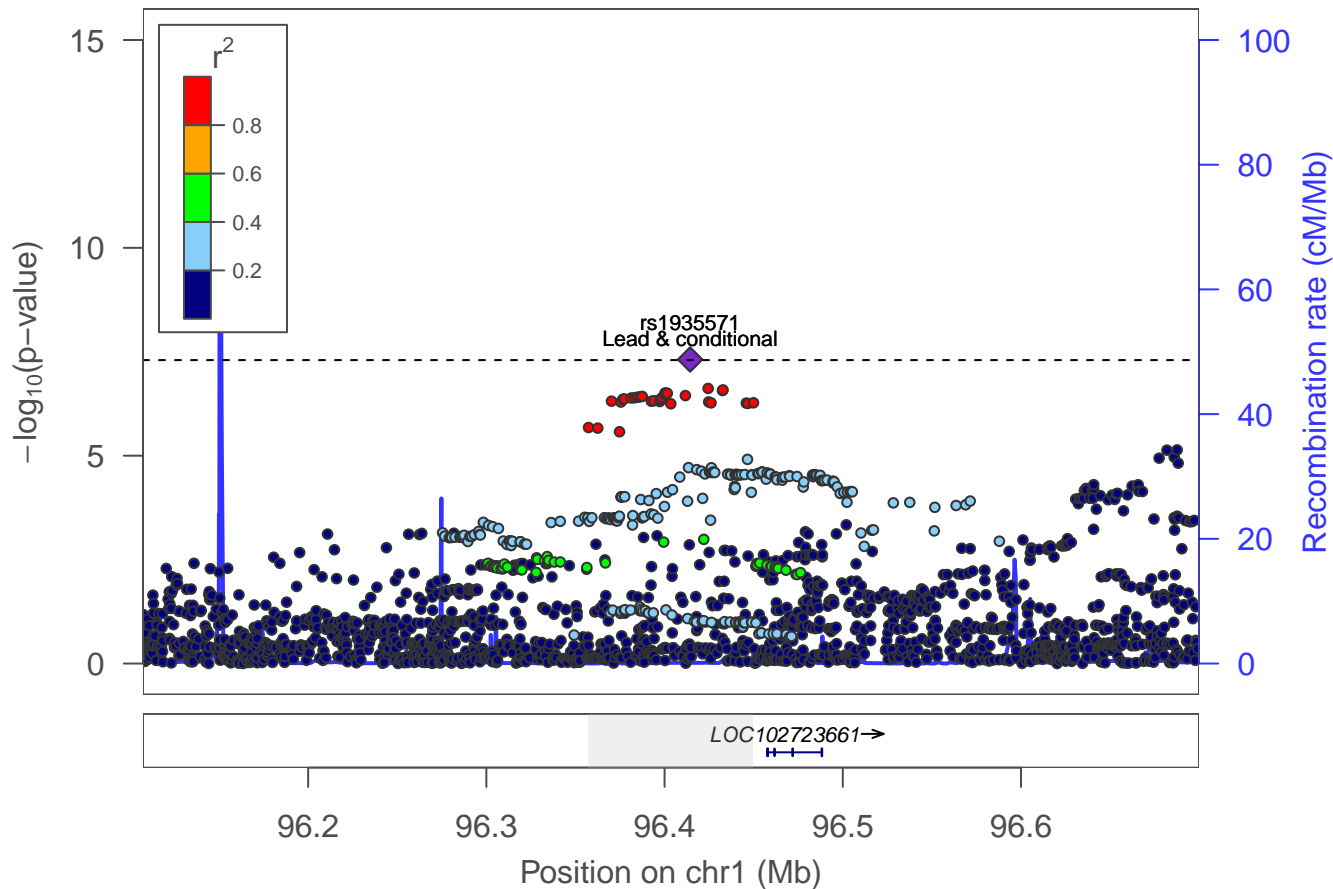



# General risk tolerance: locus 6 [chr 1:98.337–98.399Mb]

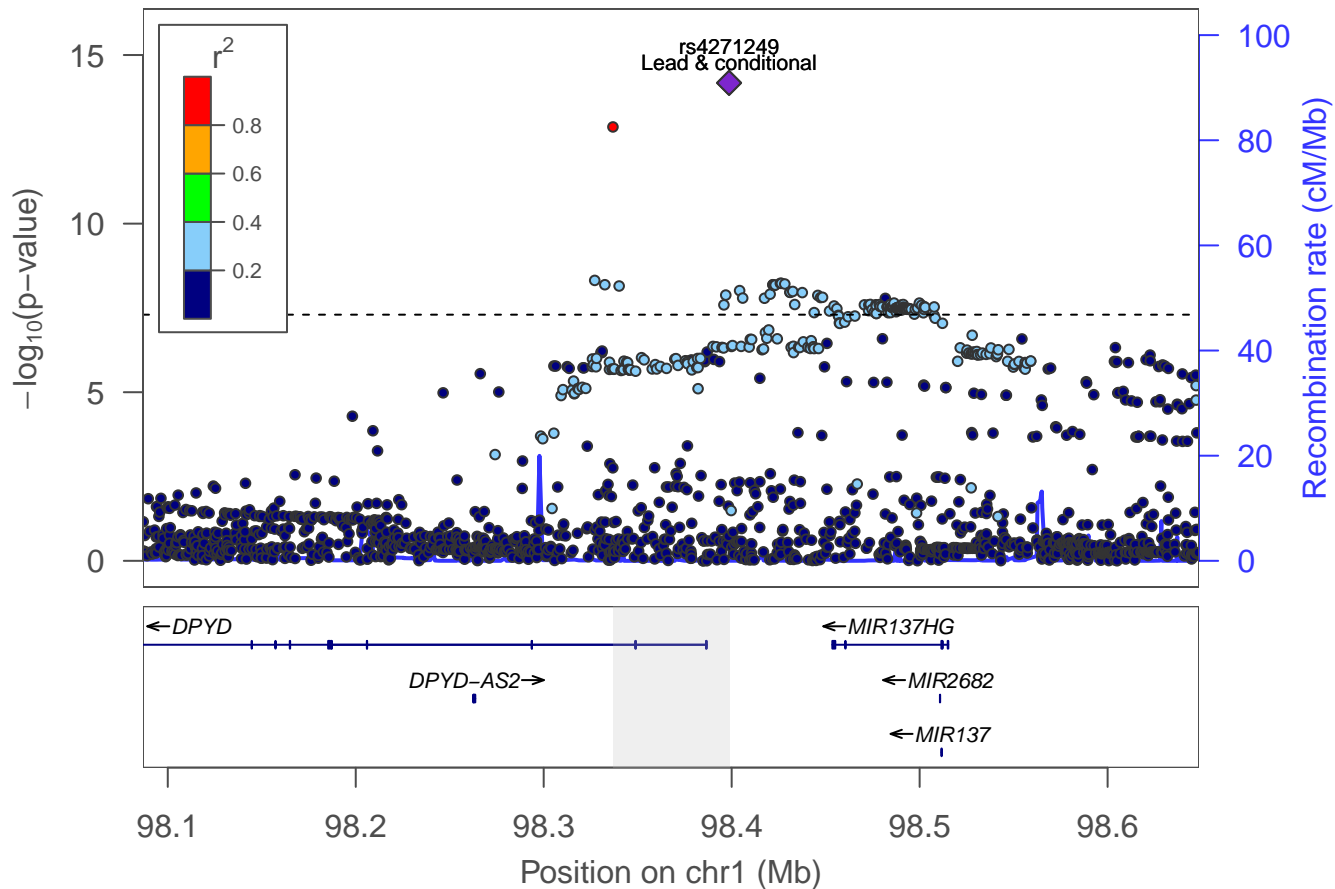

# General risk tolerance: locus 7 [chr 1:166.228–166.298Mb]

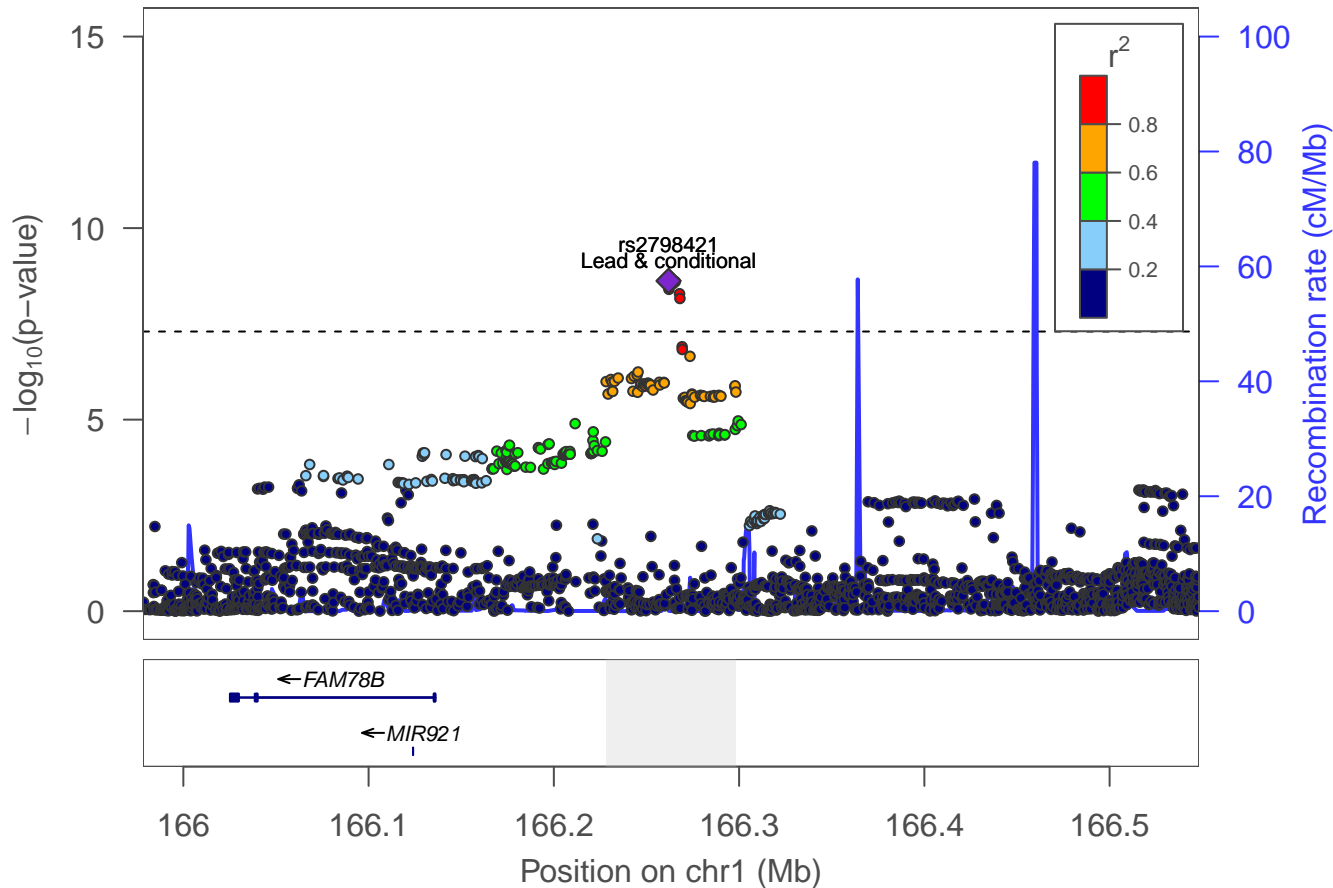

# General risk tolerance: Locus 8 [chr 1: 204.979–205.269Mb]

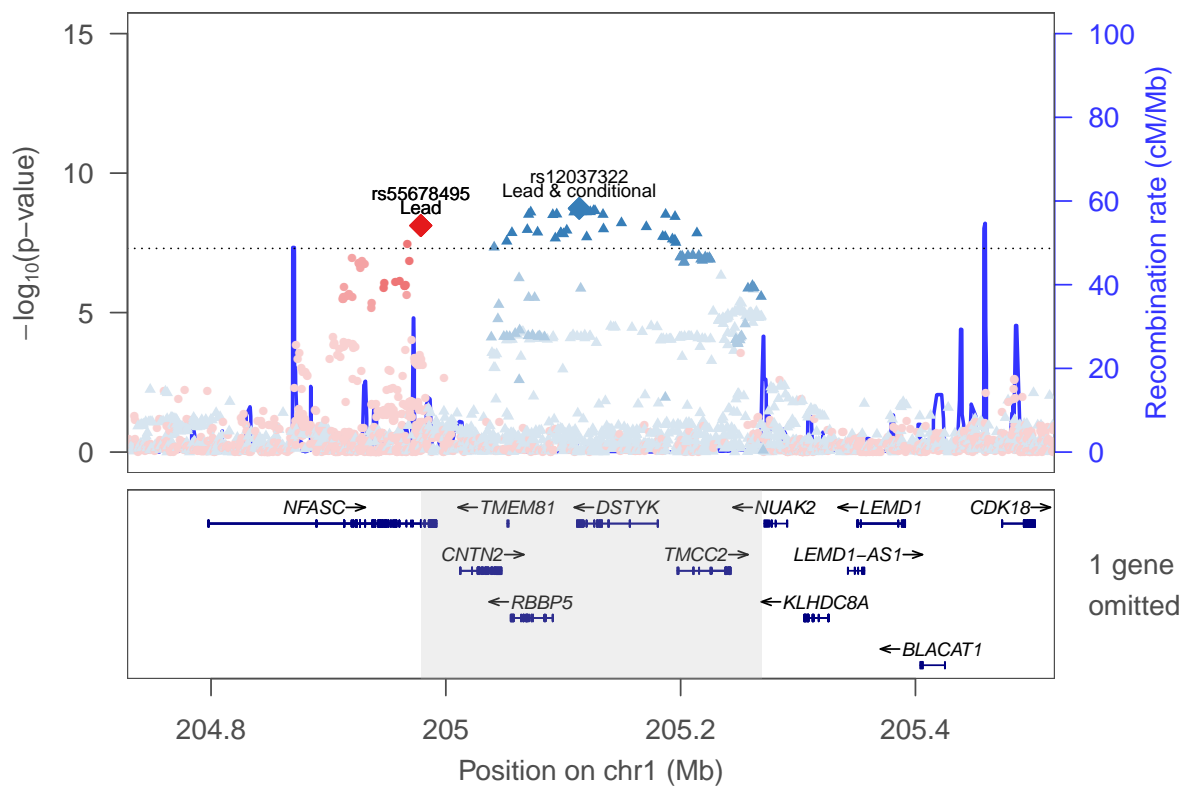

rs12037322 ▲  
rs55678495 ●

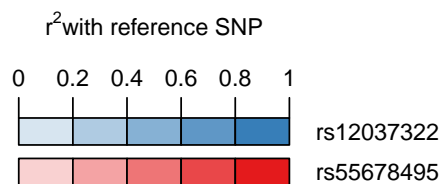

# General risk tolerance: locus 9 [chr 1:208.054–208.059Mb]

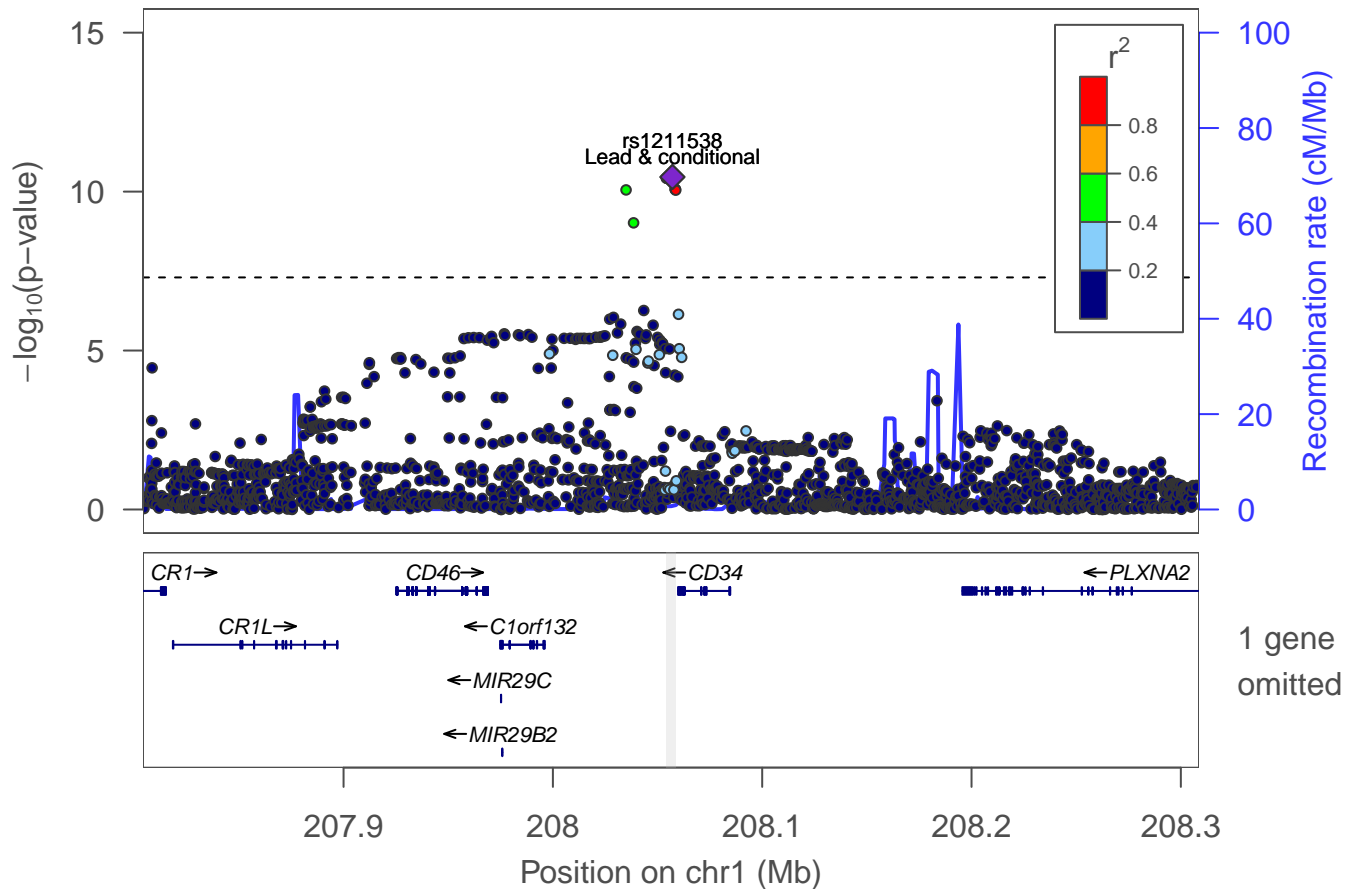

# General risk tolerance: locus 10 [chr 1:237.932–237.949Mb]

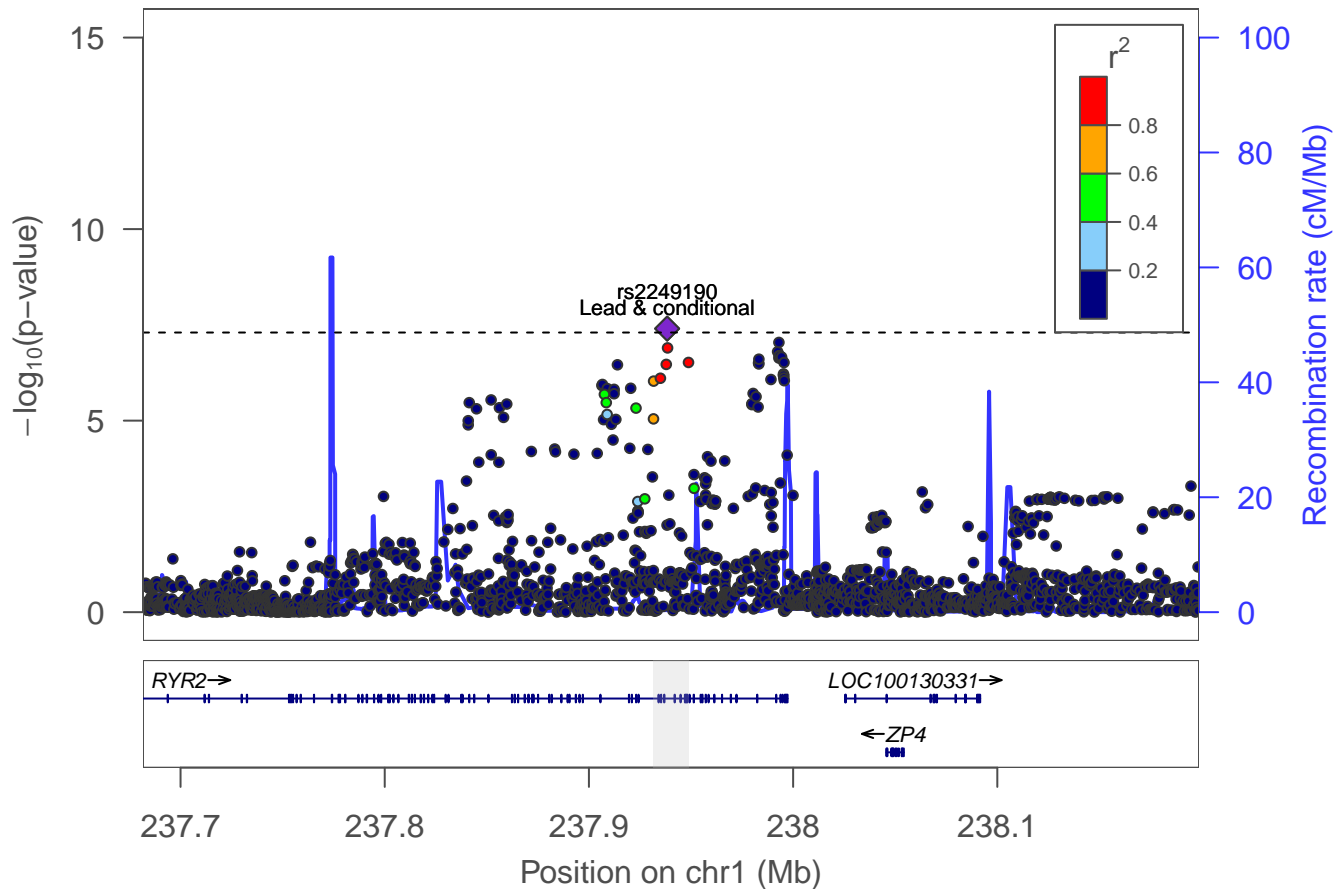

# General risk tolerance: Locus 11 [chr 1: 243.504–243.648Mb]

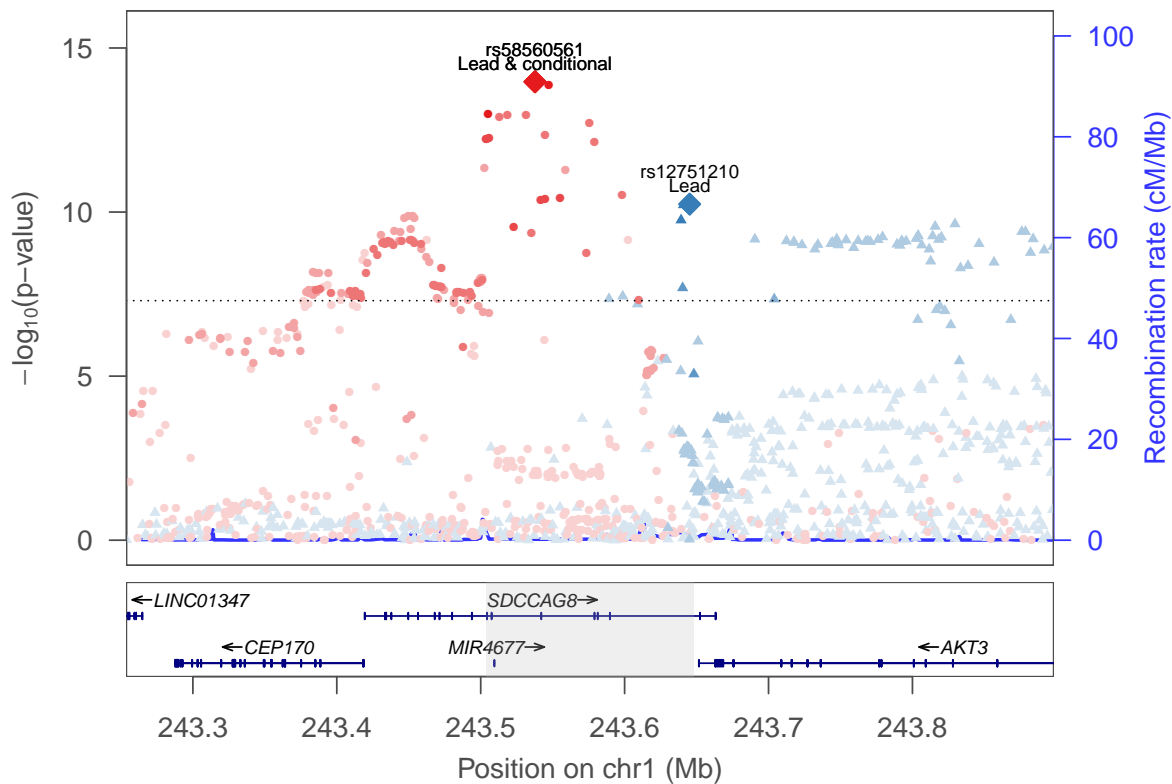

rs12751210 ▲  
rs58560561 ●

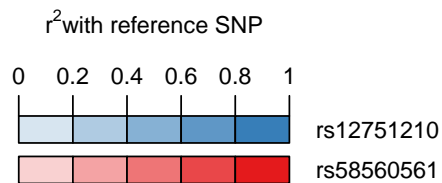

# General risk tolerance: locus 12 [chr 2:23.615–23.633Mb]

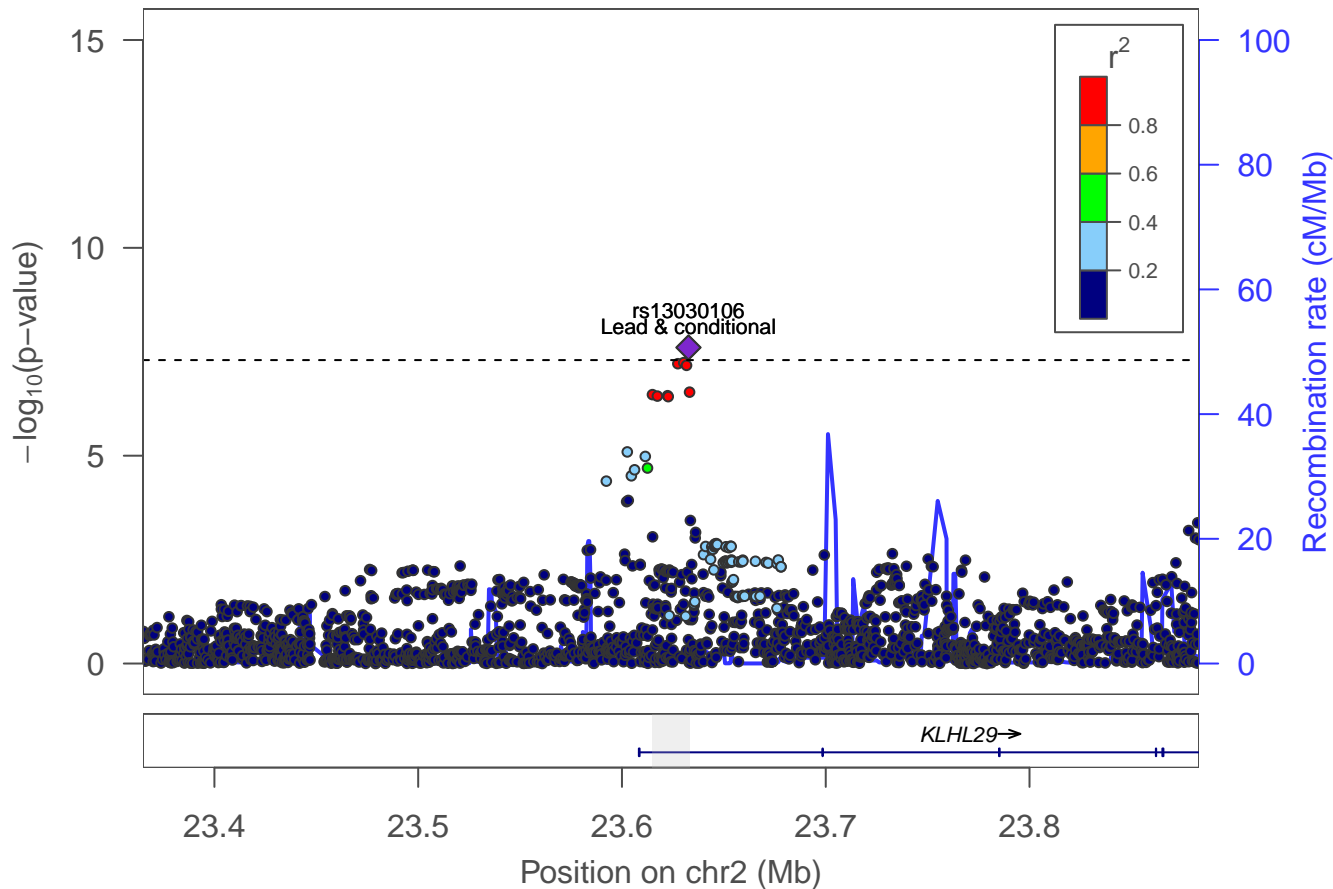

# General risk tolerance: locus 13 [chr 2:24.093–24.127Mb]

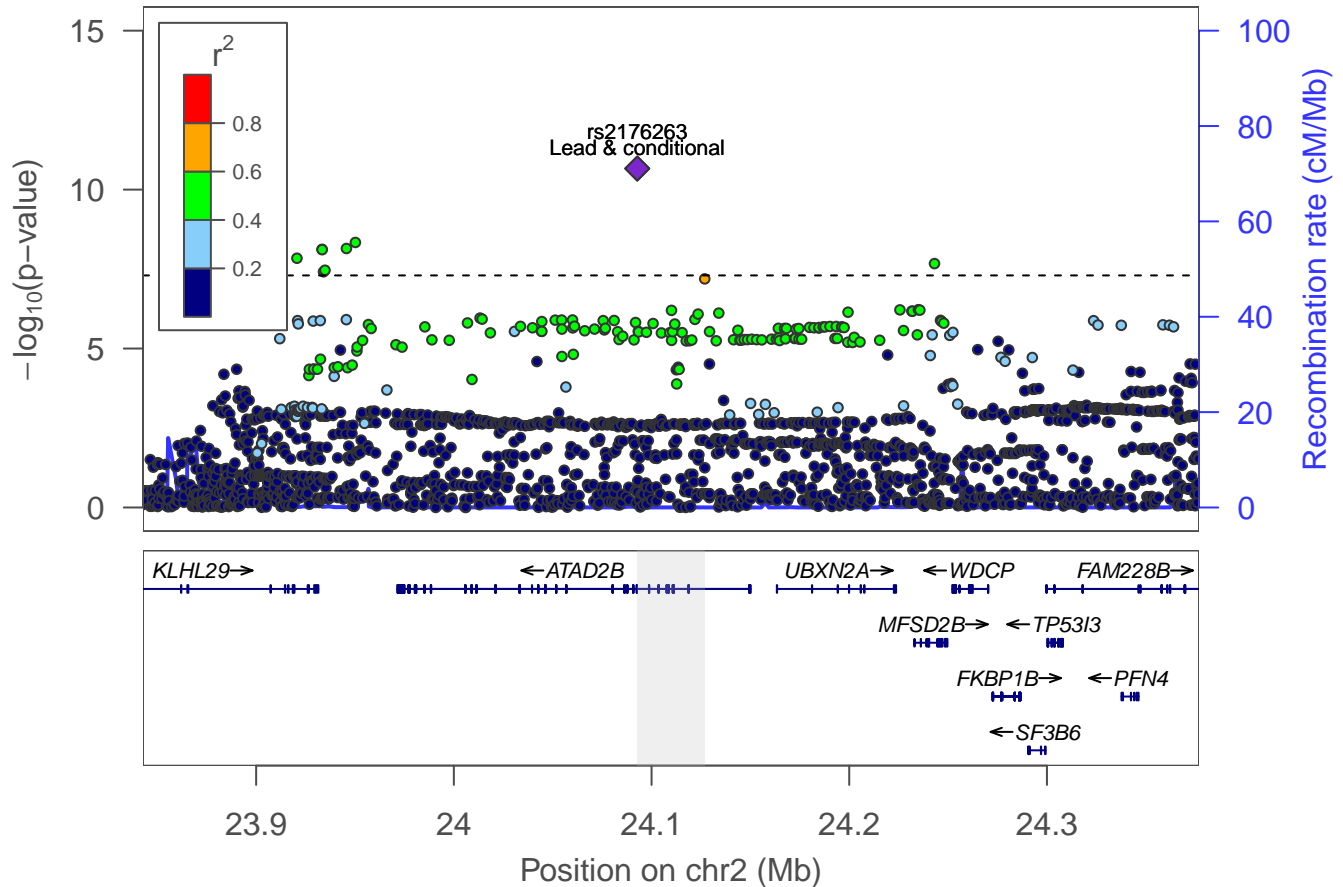



# General risk tolerance: locus 14 [chr 2:44.741–44.883Mb]

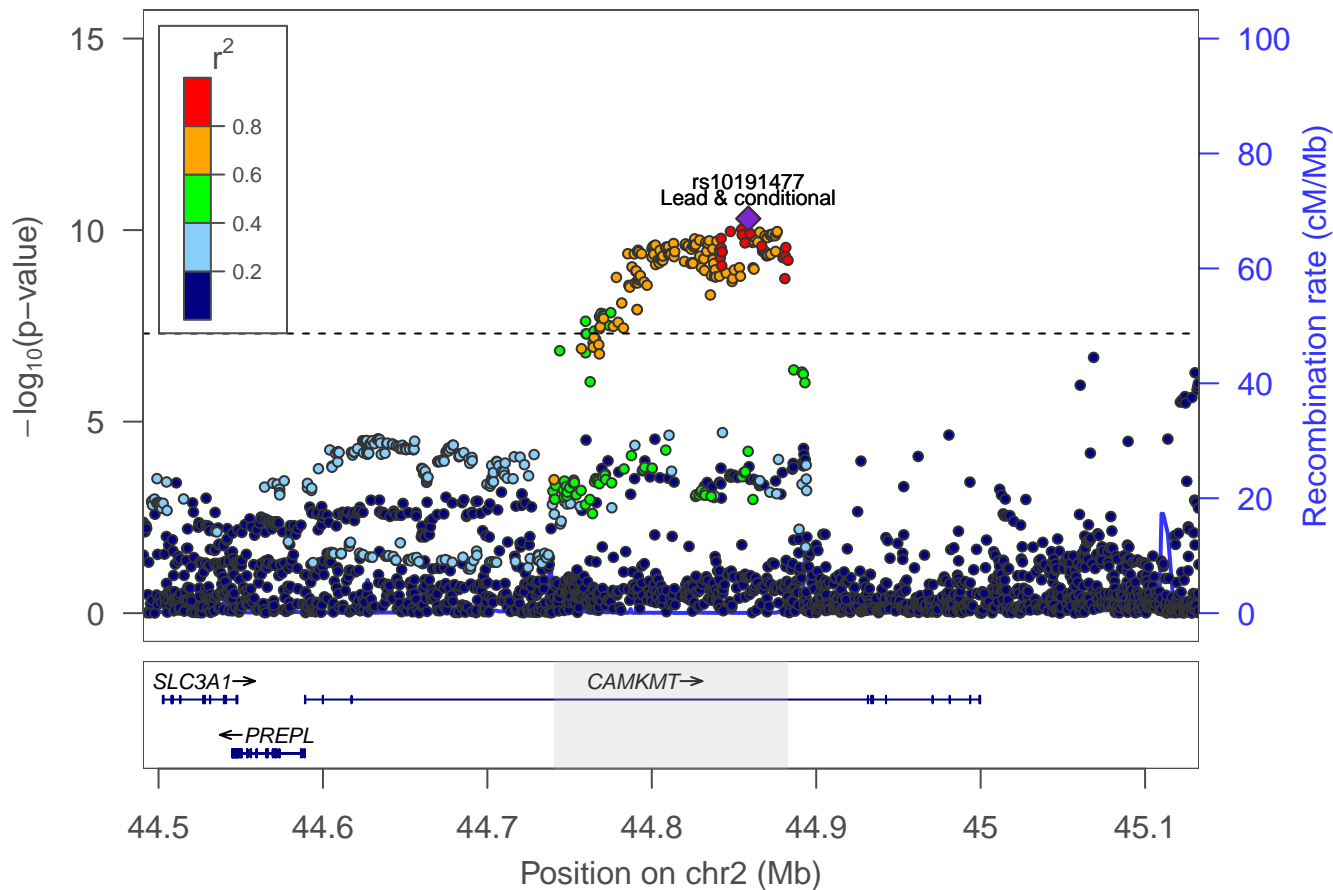

# General risk tolerance: Locus 15 [chr 2: 45.196–45.197Mb]

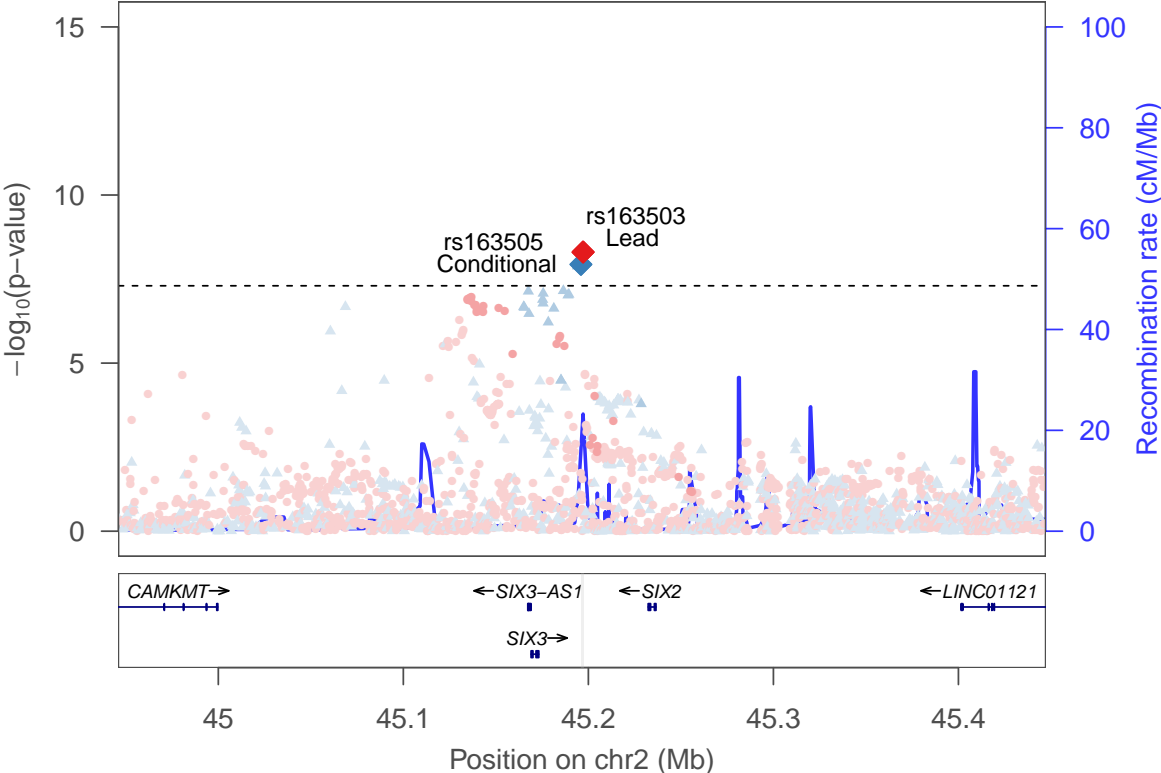

rs163505 ▲  
rs163503 ●

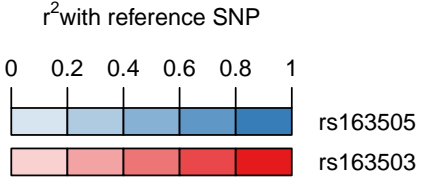

# General risk tolerance: locus 16 [chr 2:51.170–51.297Mb]

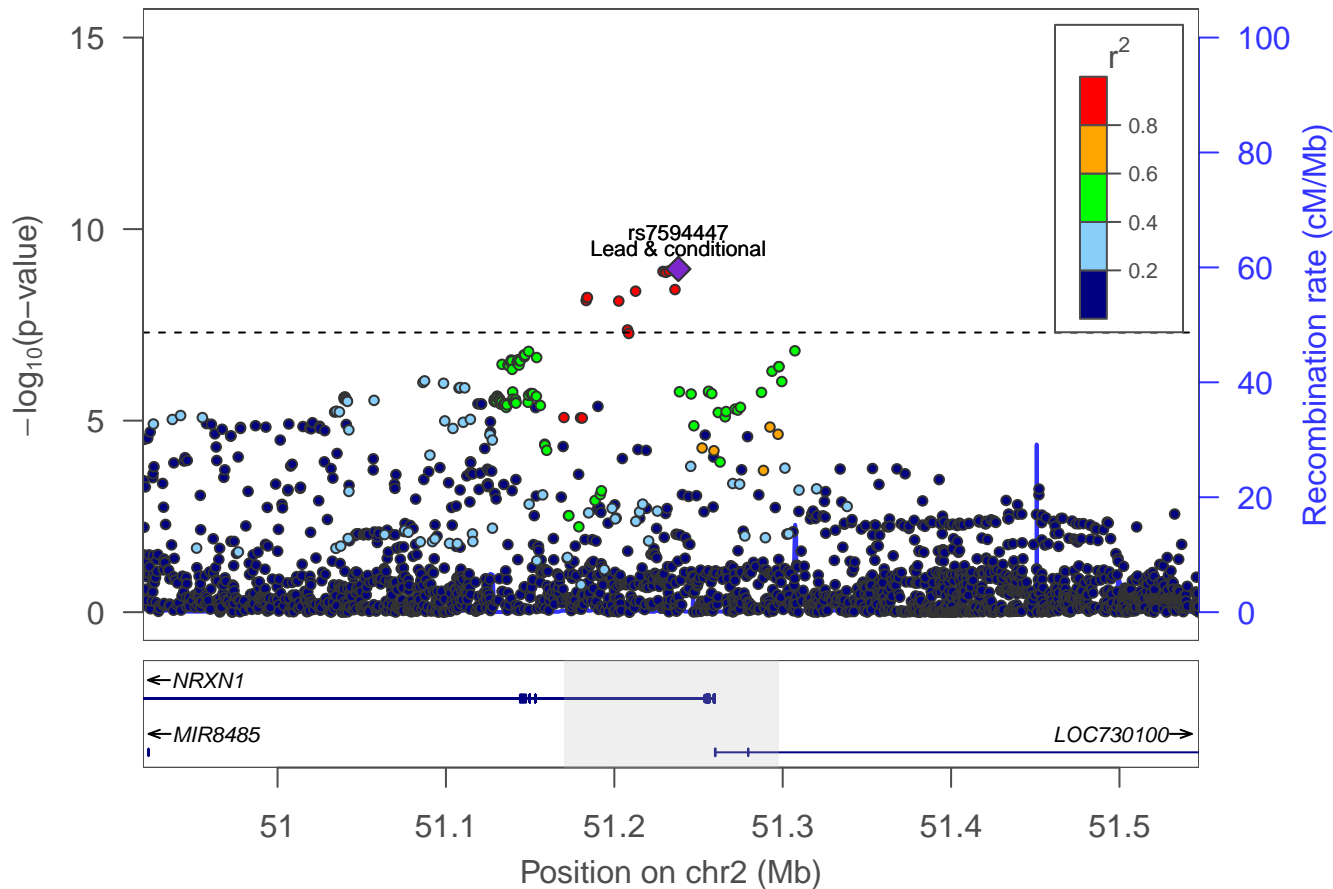

# General risk tolerance: Locus 17 [chr 2: 60.003–60.175Mb]

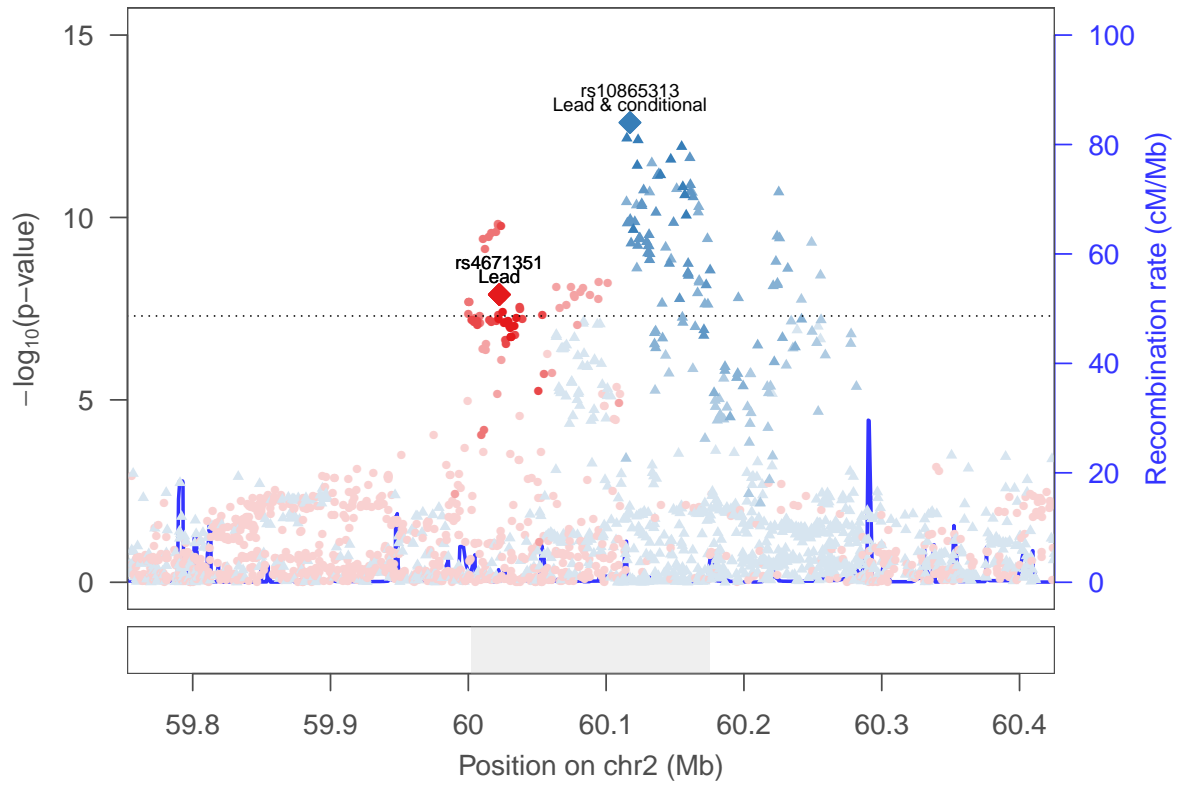

rs10865313 ▲  
rs4671351 ●

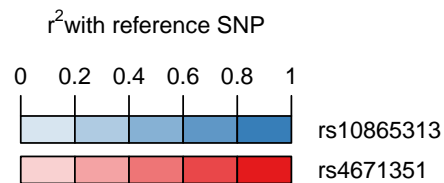

# General risk tolerance: locus 18 [chr 2:140.192–140.462Mb]

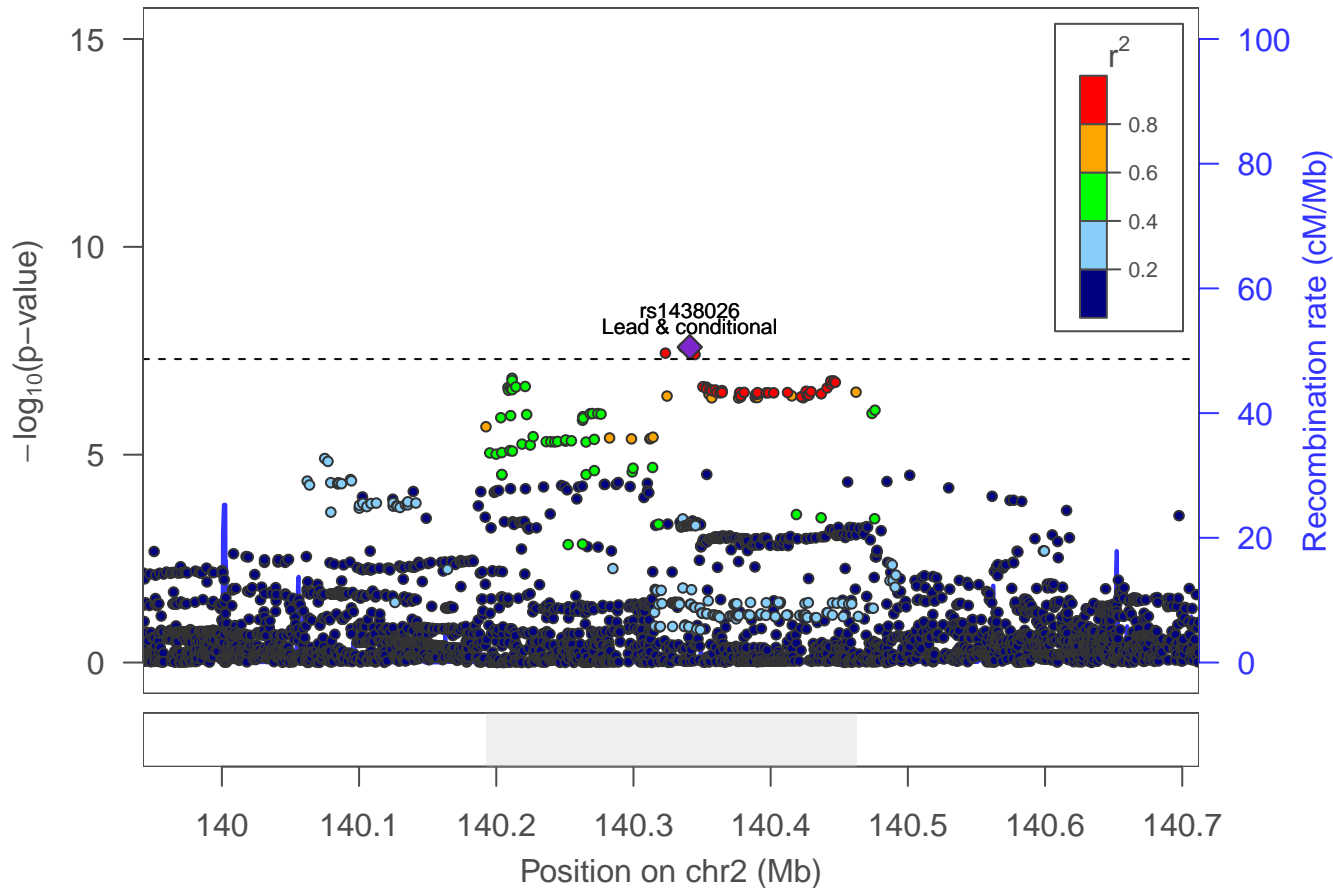

# General risk tolerance: locus 19 [chr 2:145.653–145.753Mb]

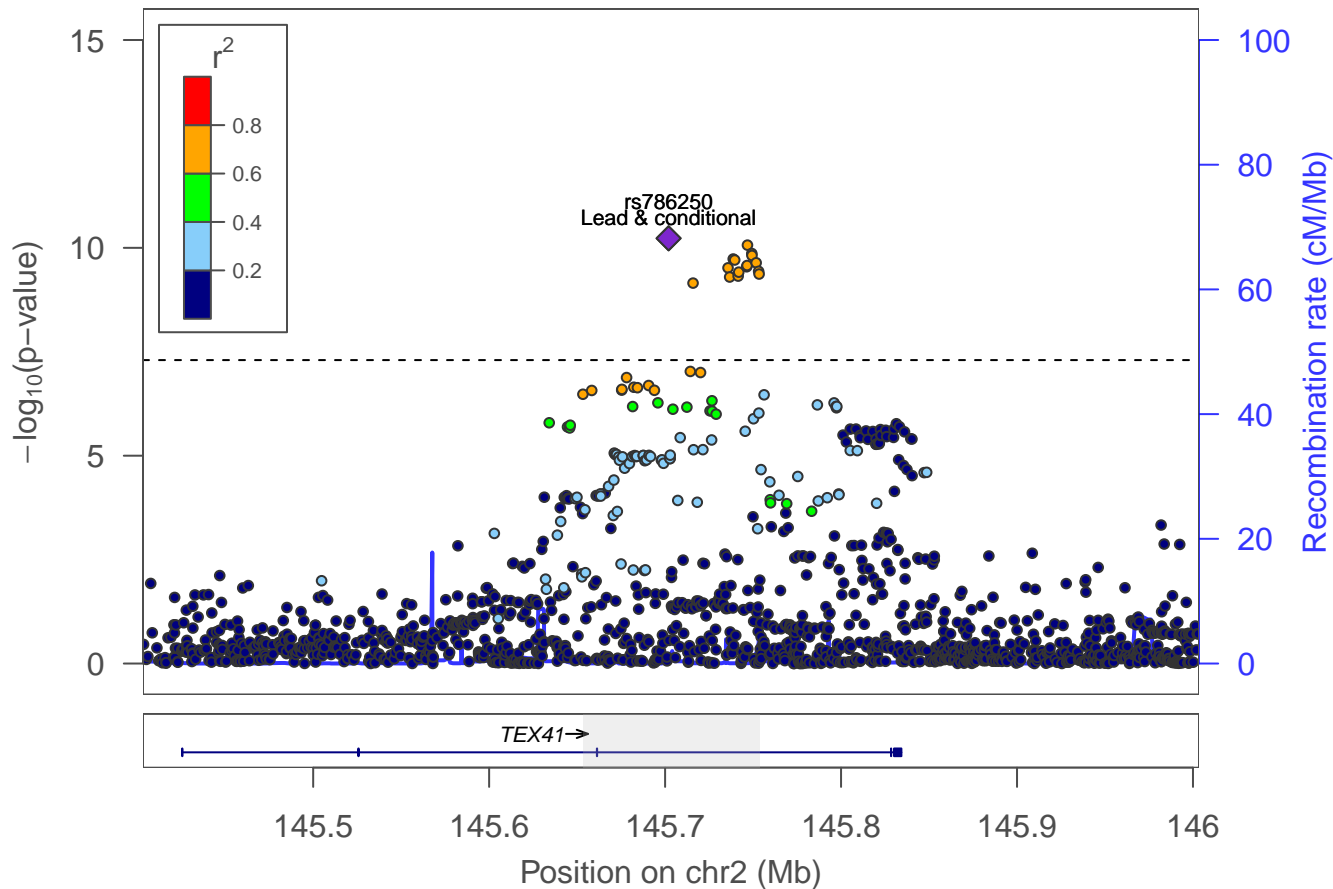

# General risk tolerance: locus 20 [chr 2:205.149–205.186Mb]

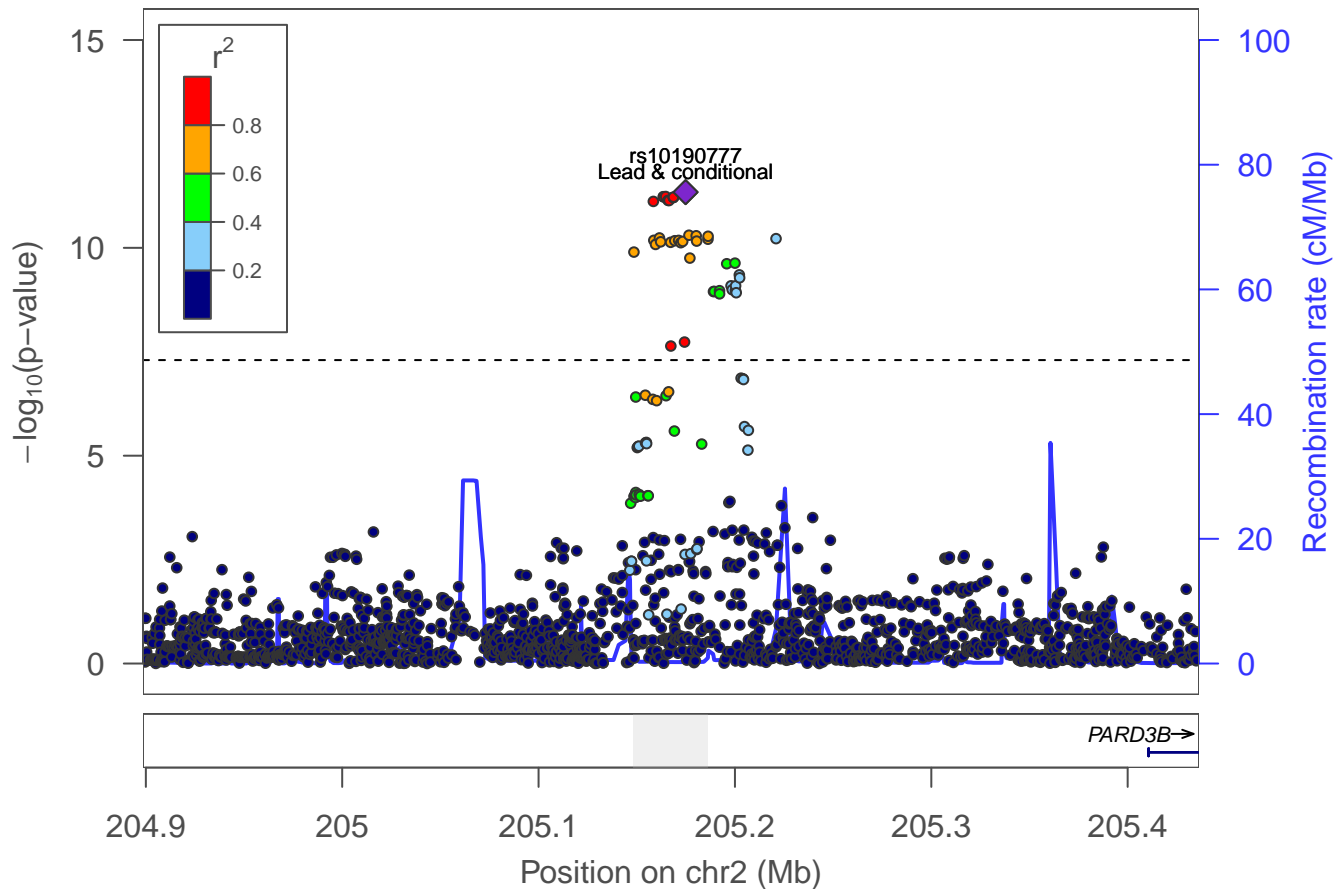

# General risk tolerance: locus 21 [chr 2:225.334–225.468Mb]

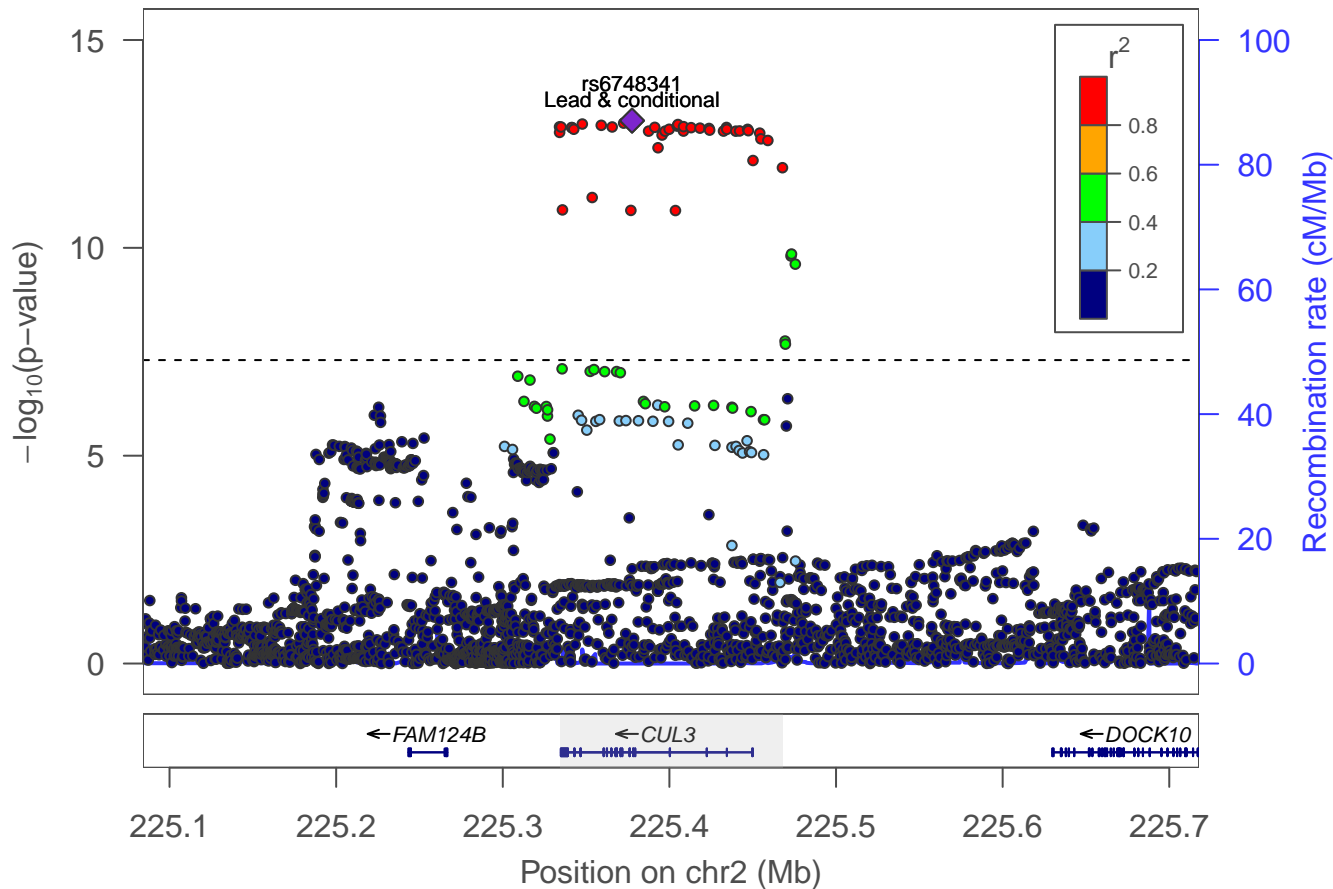



# General risk tolerance: Locus 22 [chr 3: 0.210–0.237Mb]

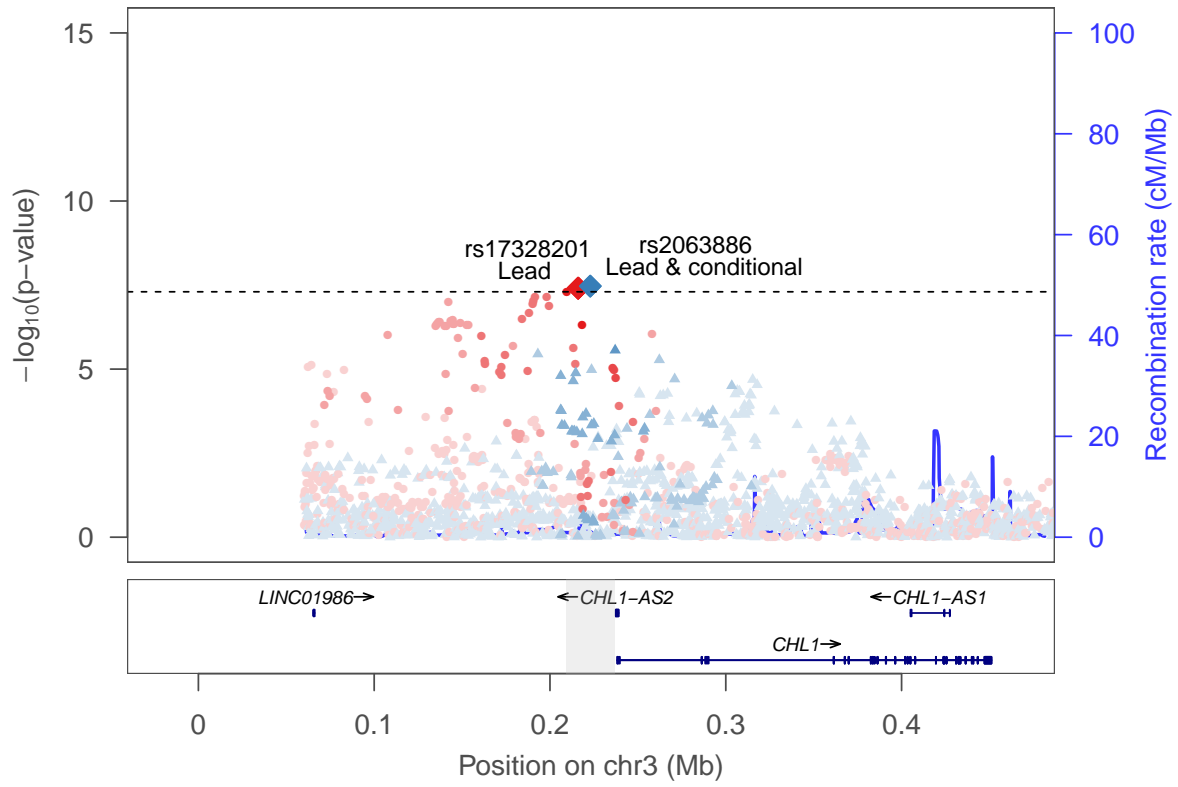

rs2063886 ▲  
rs17328201 ●

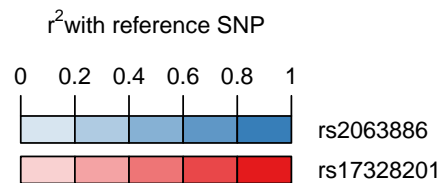

# General risk tolerance: locus 23 [chr 3:17.219–17.883Mb]

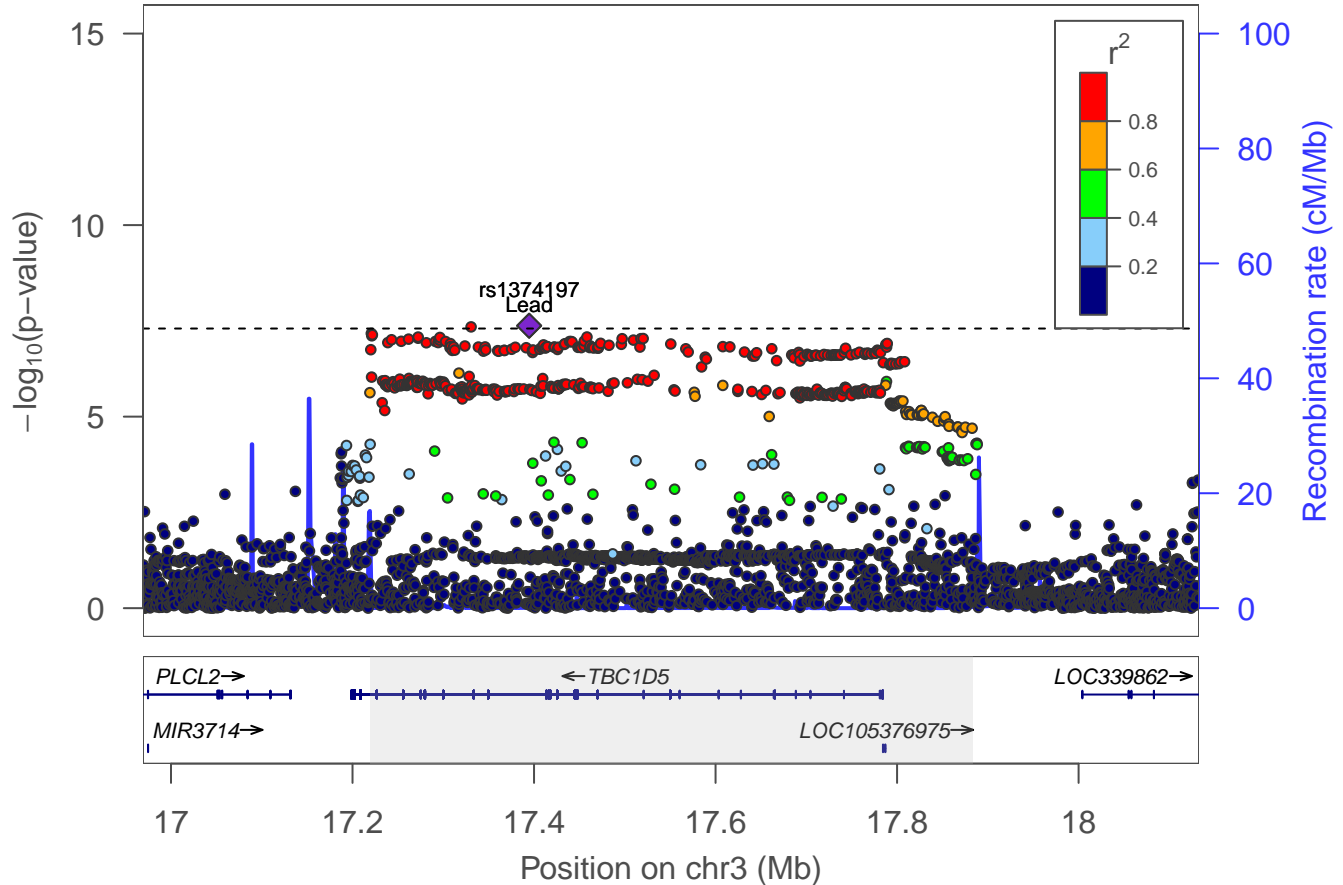

# General risk tolerance: locus 24 [chr 3:18.670–18.745Mb]

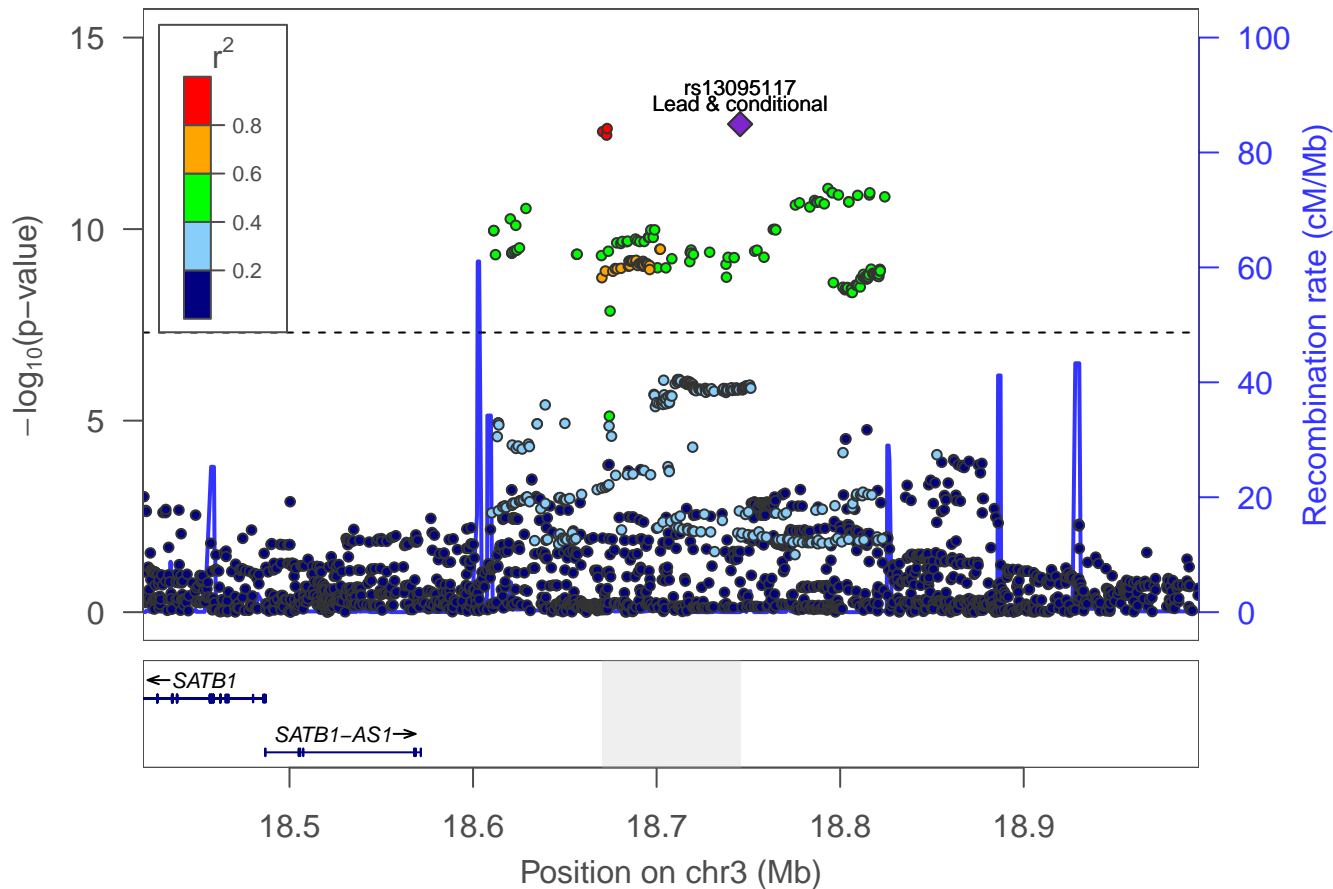

# General risk tolerance: locus 25 [chr 3:50.175–50.177Mb]

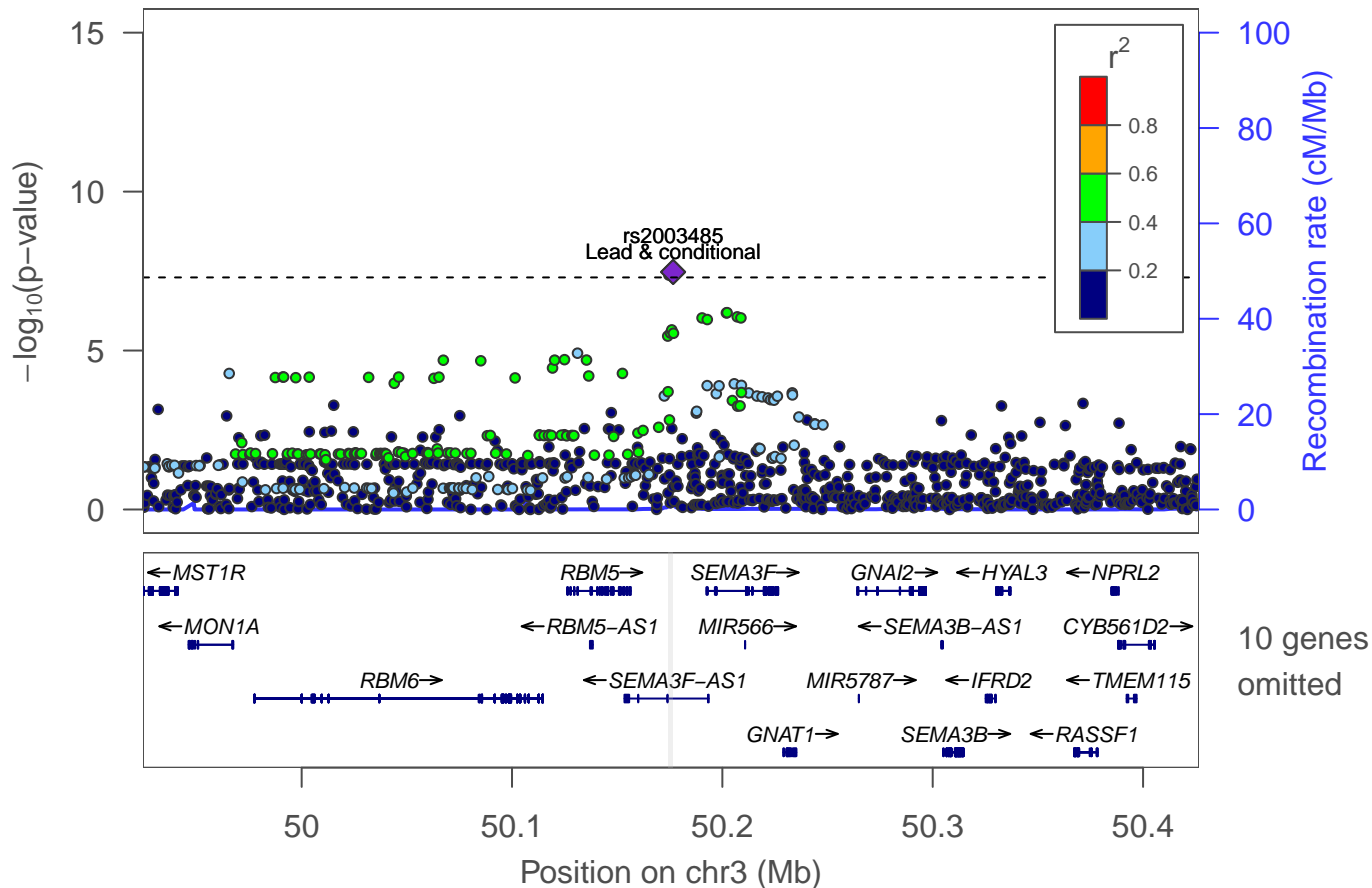

# General risk tolerance: locus 26 [chr 3:71.499–71.587Mb]

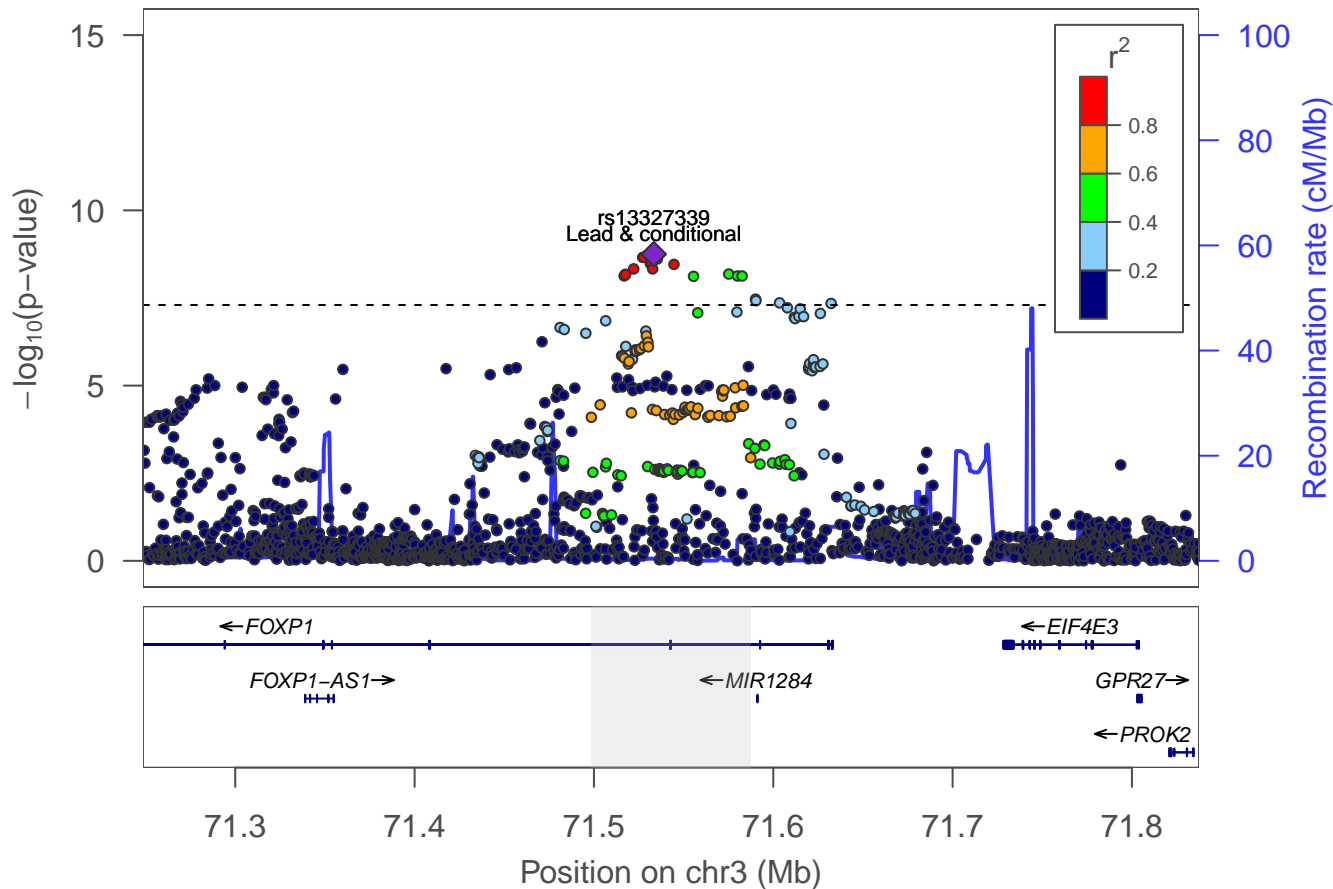

# General risk tolerance: Locus 27 [chr 3: 84.842–85.959Mb]

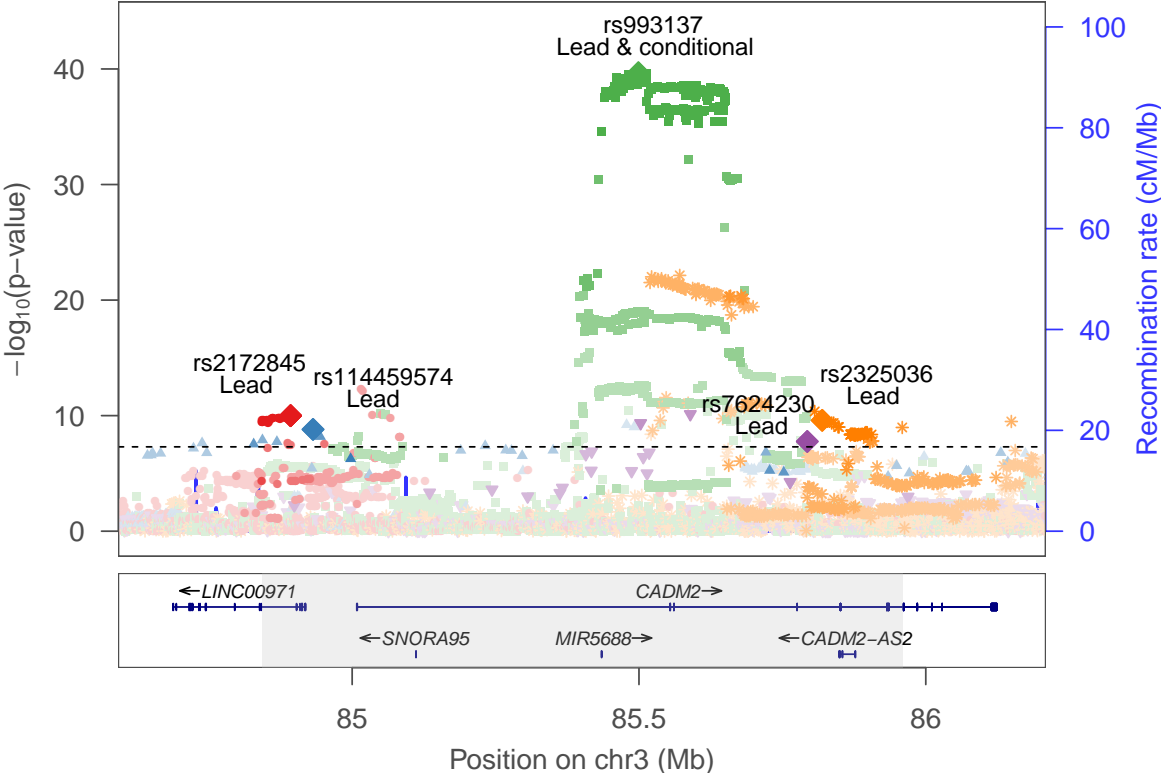

- rs2325036 \* (orange asterisk)
- rs7624230 ▾ (purple inverted triangle)
- rs993137 ■ (green square)
- rs114459574 ▲ (blue triangle)
- rs2172845 ● (red circle)

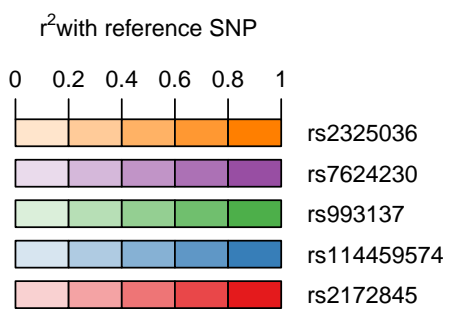

# General risk tolerance: locus 28 [chr 3:86.503–86.738Mb]

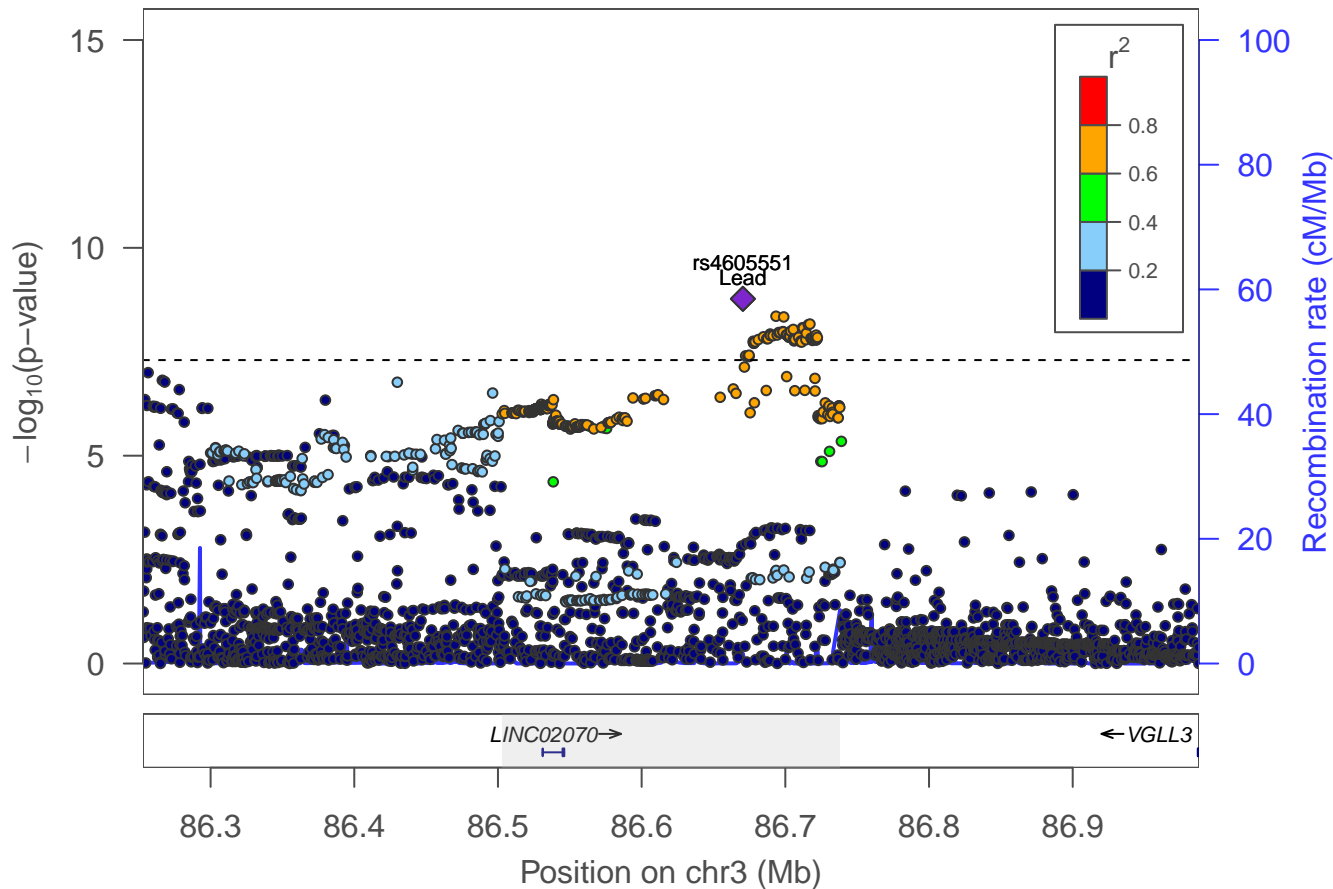

# General risk tolerance: locus 29 [chr 3:127.083–127.192Mb]

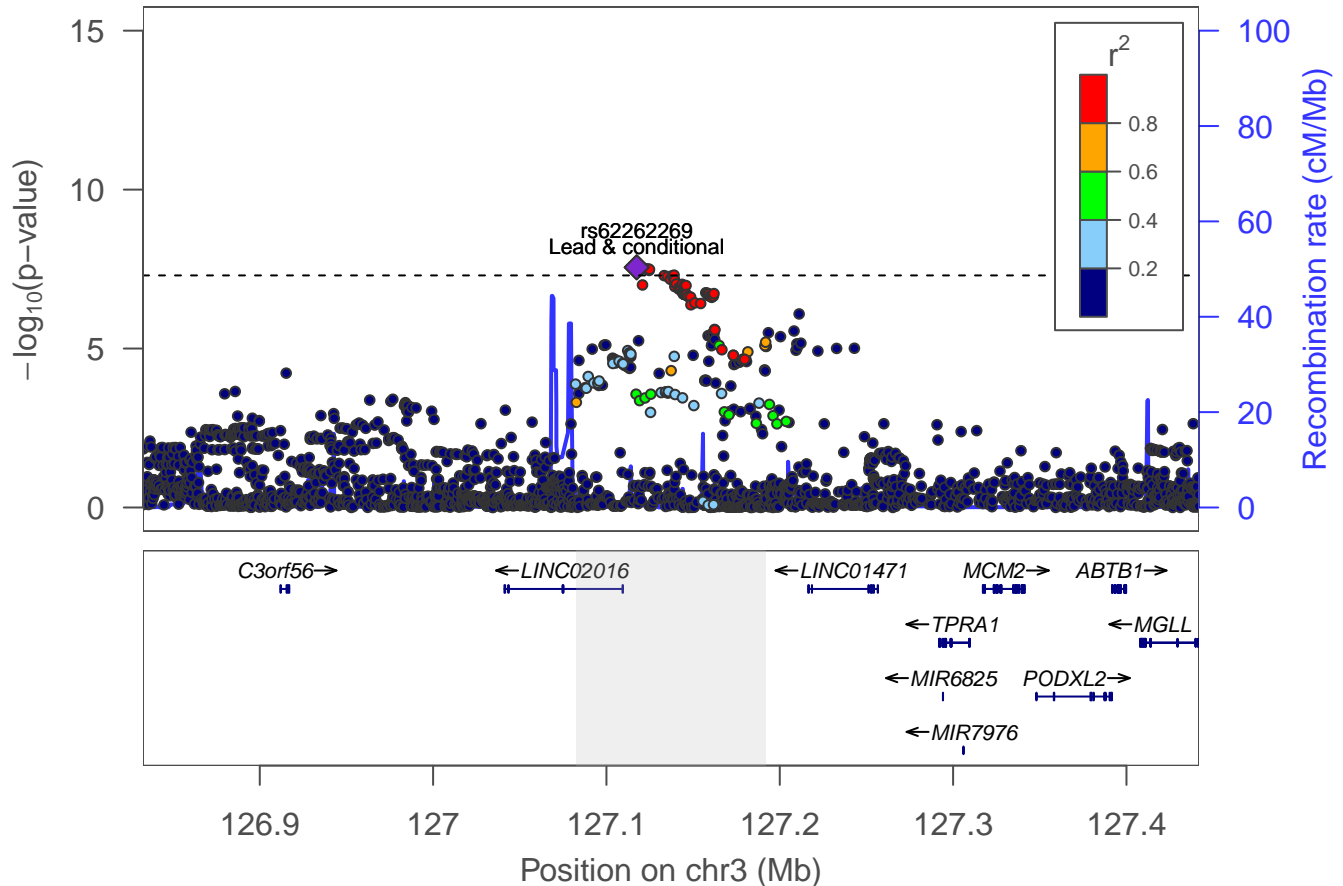



# General risk tolerance: locus 30 [chr 3:135.814–136.615Mb]

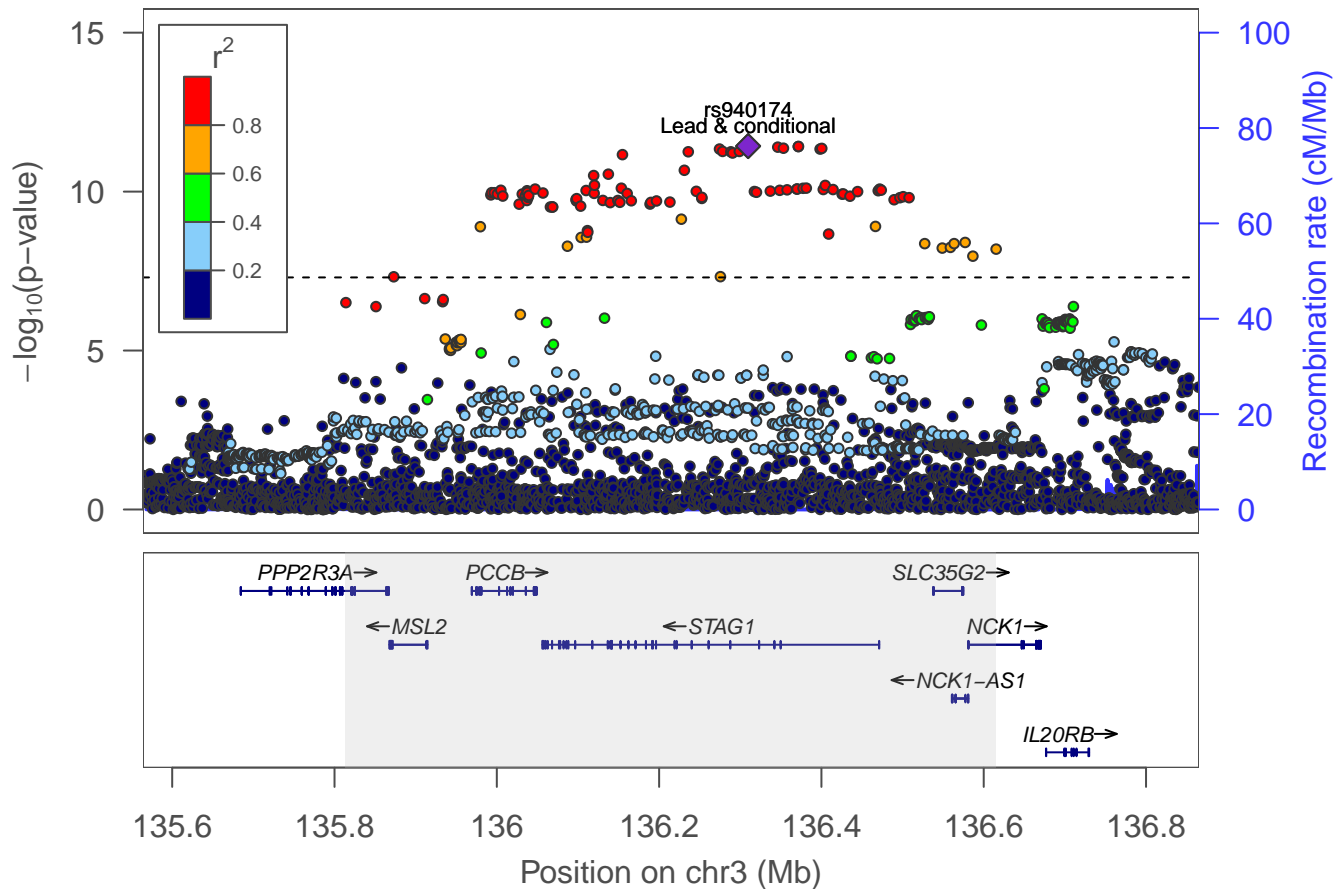

# General risk tolerance: locus 31 [chr 3:143.637–143.827Mb]

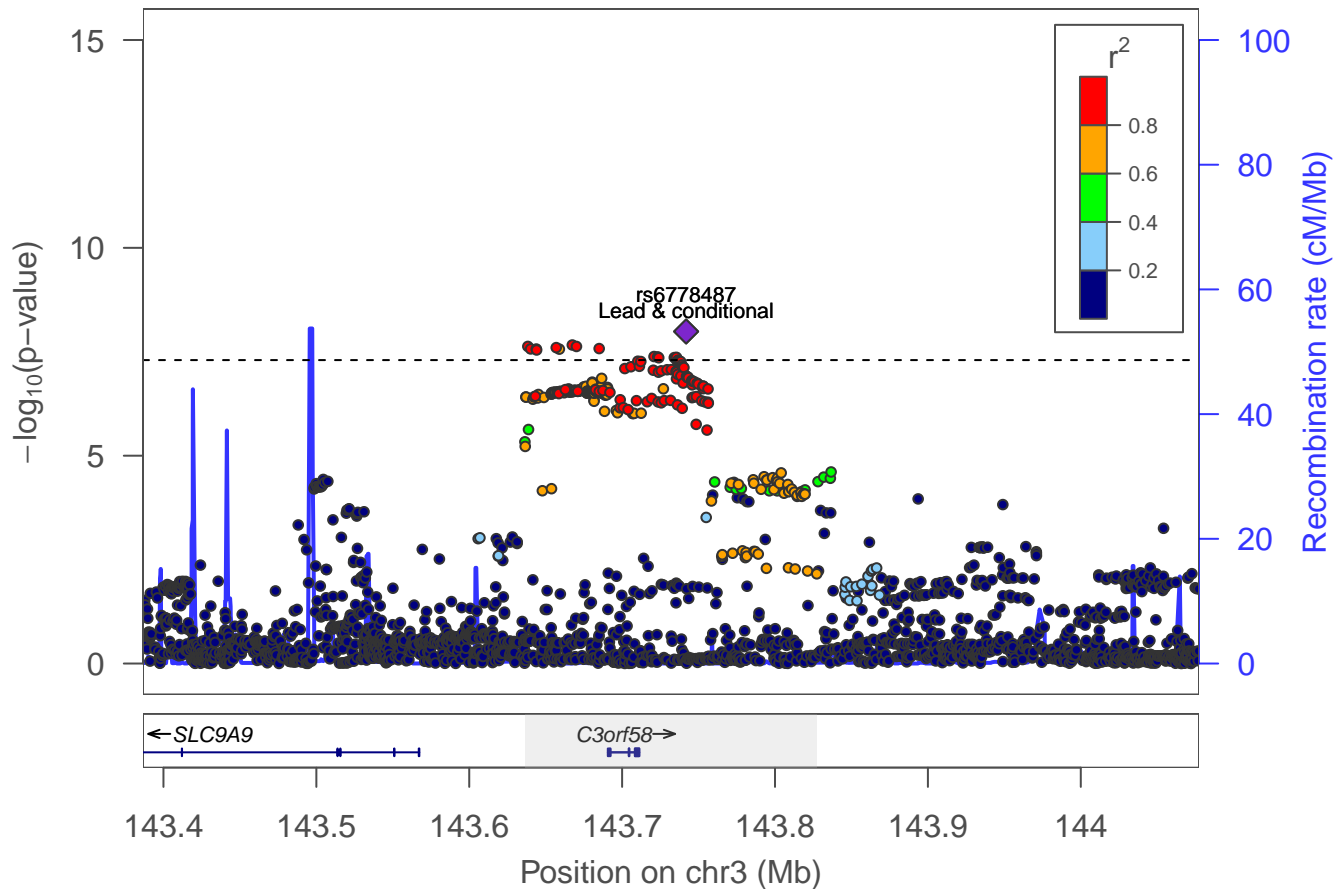

# General risk tolerance: Locus 32 [chr 3: 181.419–181.427Mb]

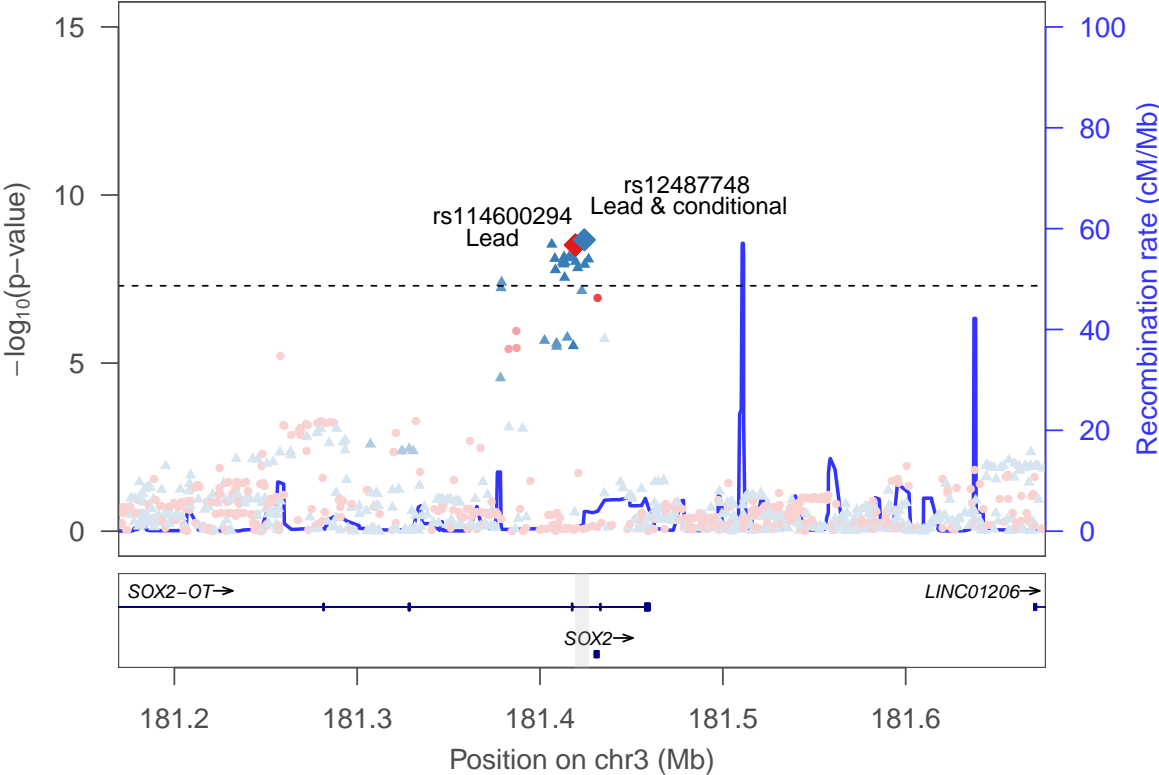

rs12487748    ▲  
rs114600294    ●

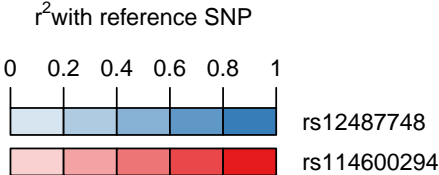

# General risk tolerance: locus 33 [chr 4:31.183–31.205Mb]

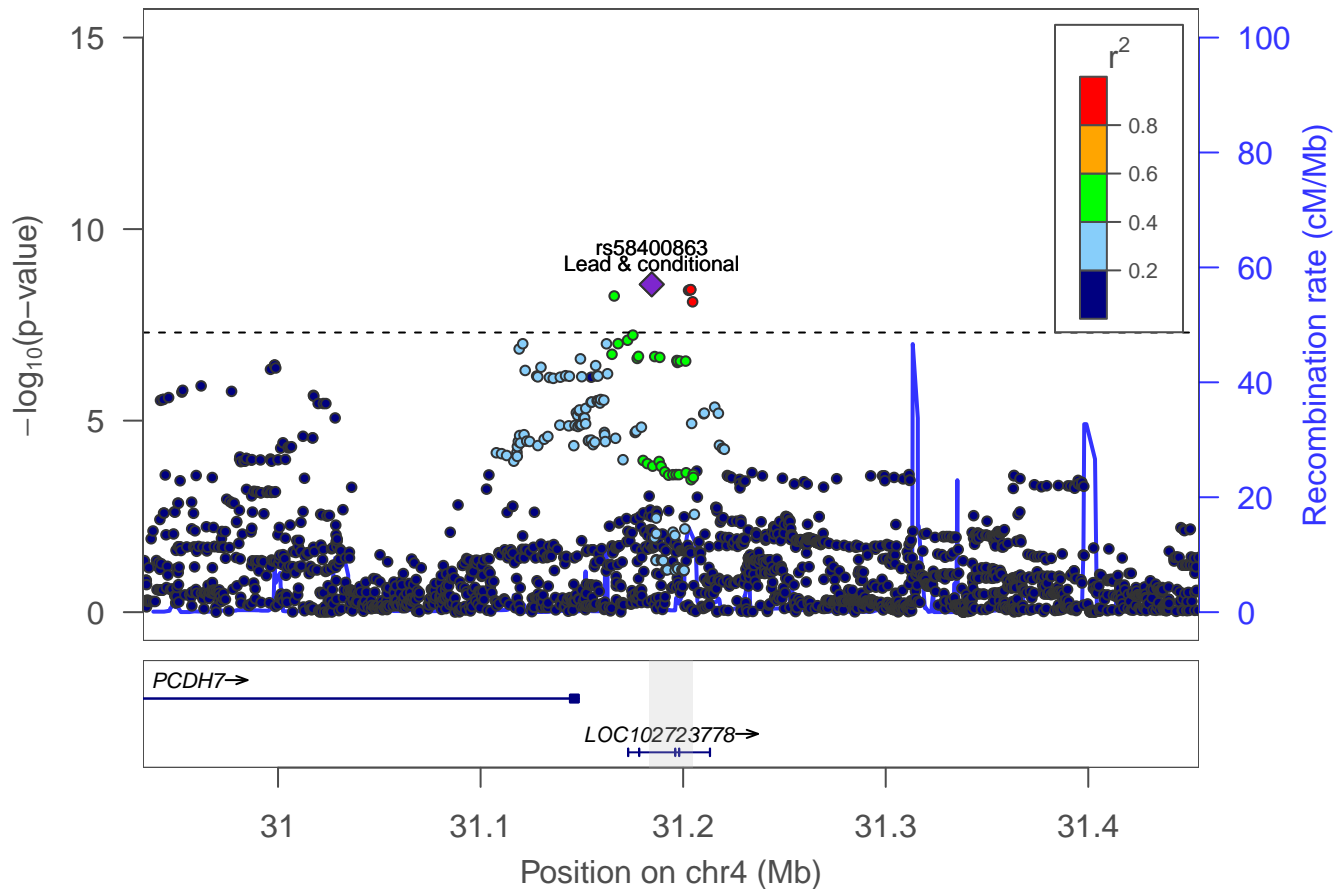

# General risk tolerance: locus 34 [chr 4:46.191–46.362Mb]

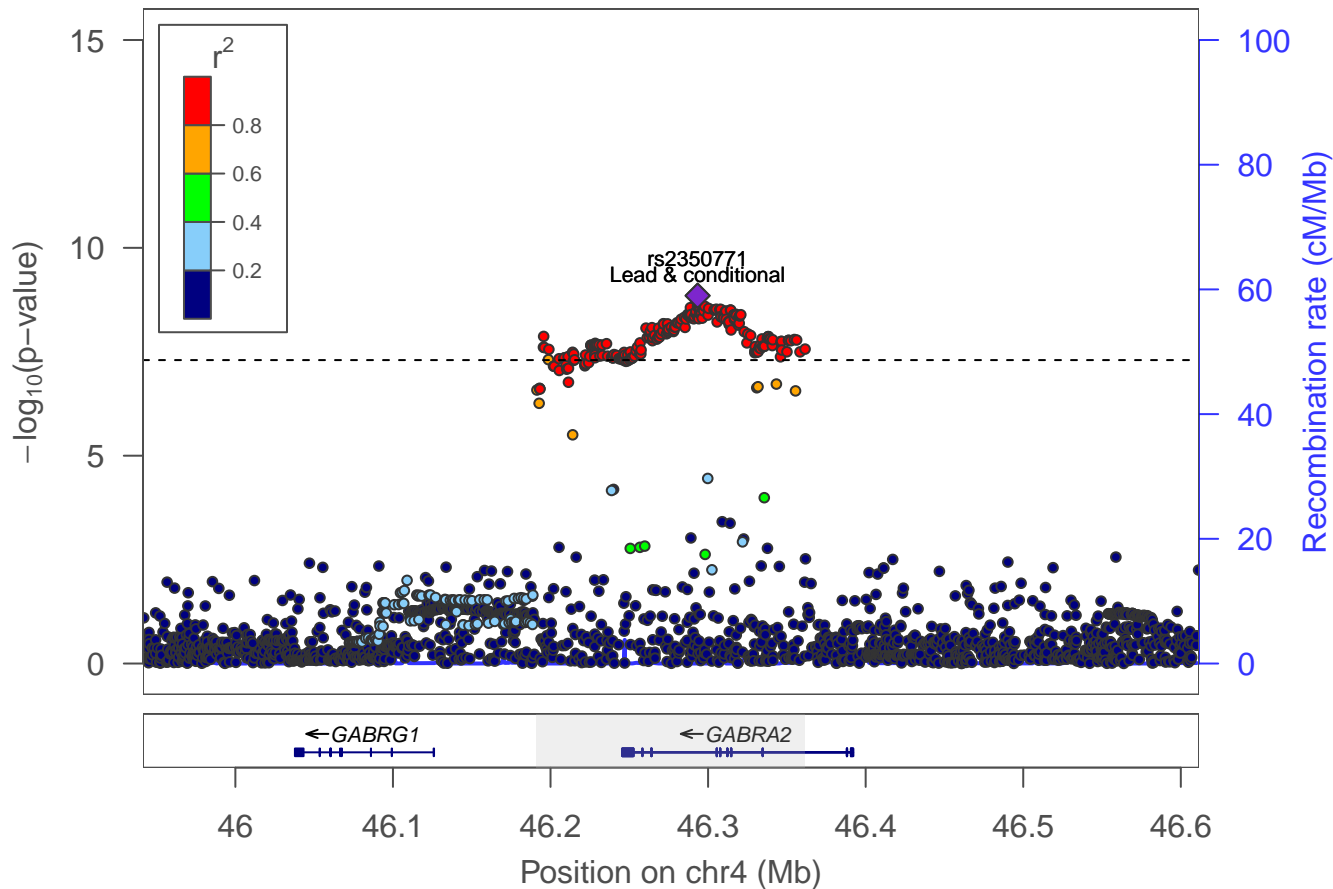

# General risk tolerance: locus 35 [chr 4:66.429–66.543Mb]

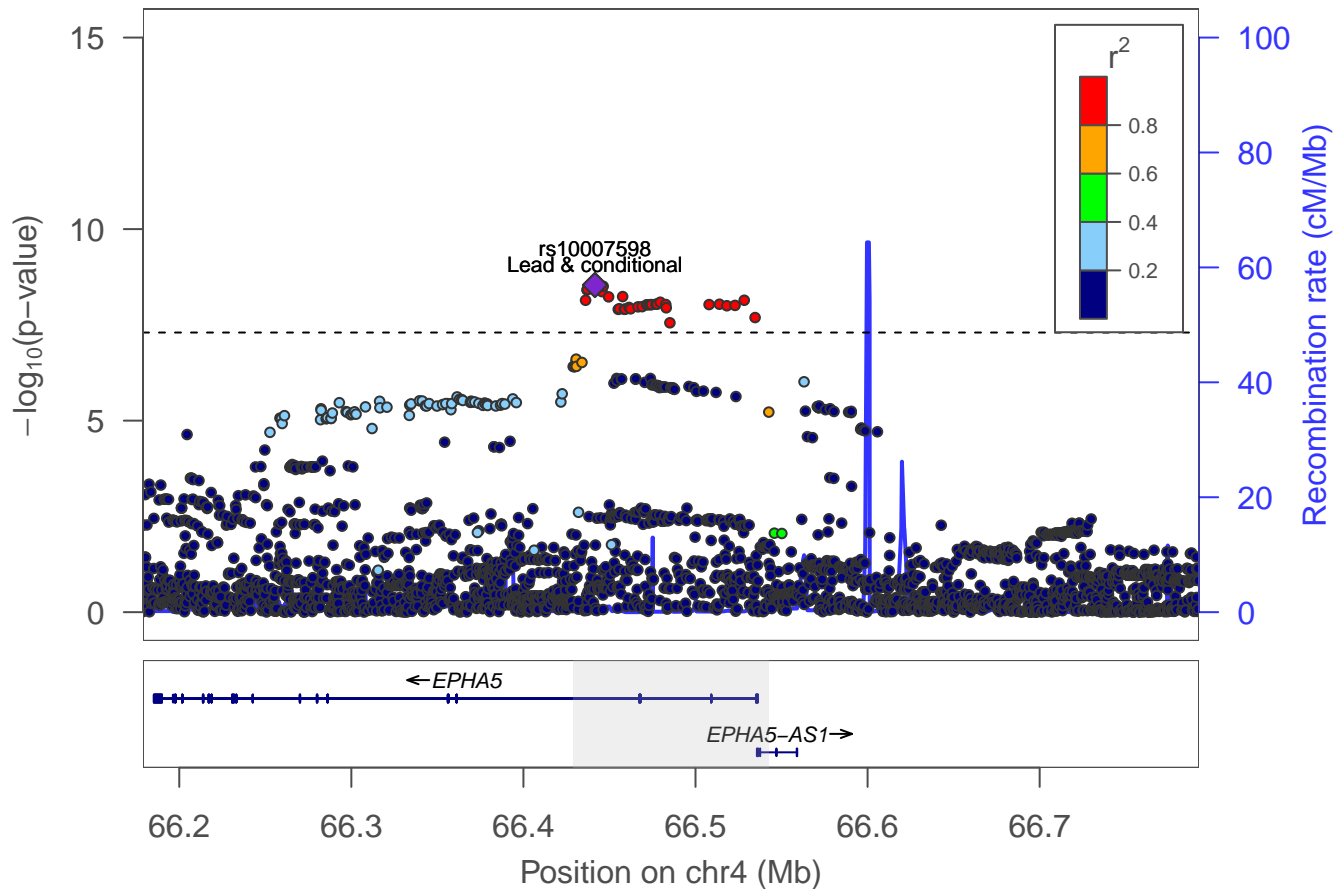

# General risk tolerance: locus 36 [chr 4:81.960–81.978Mb]

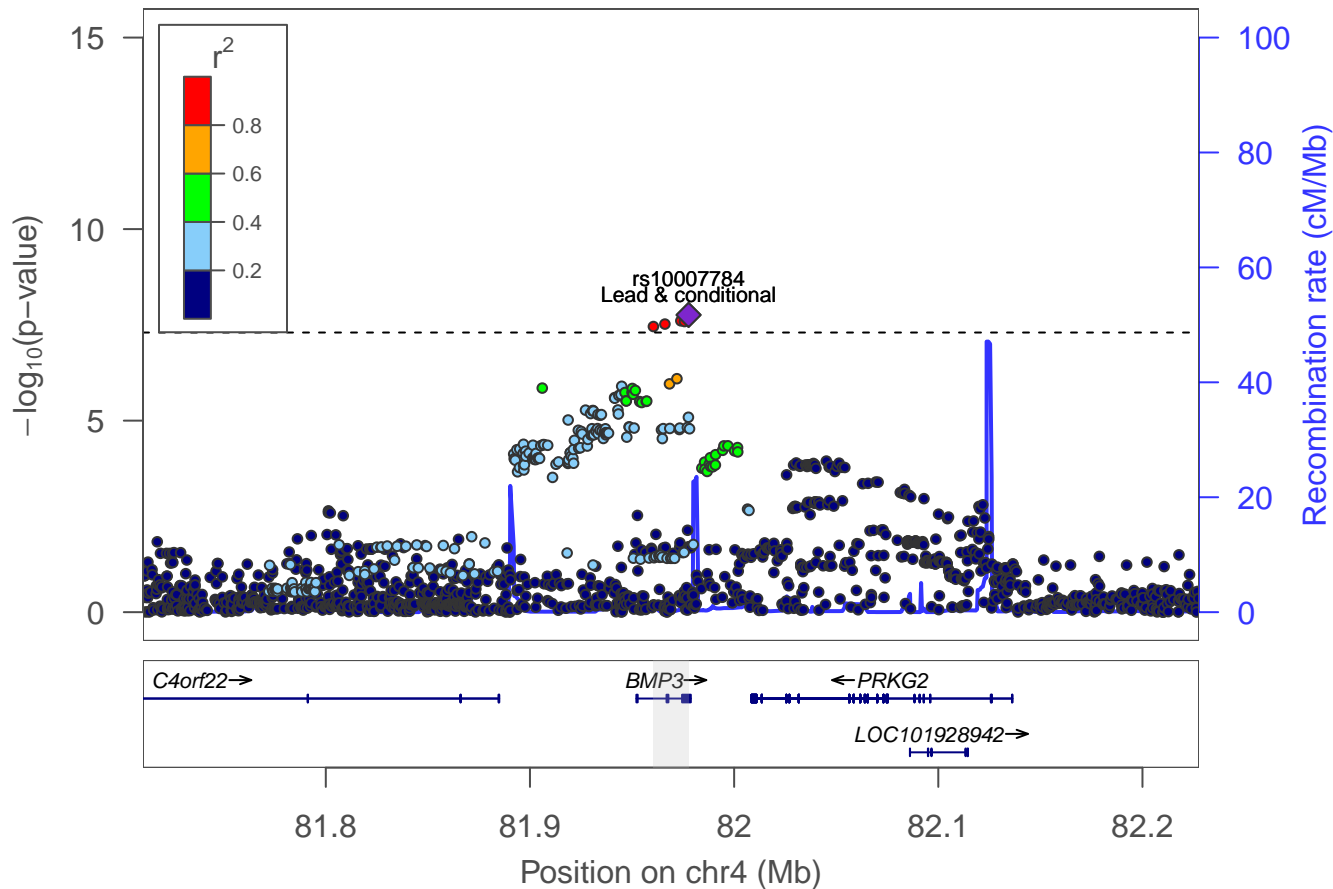

# General risk tolerance: locus 37 [chr 4:106.064–106.202Mb]

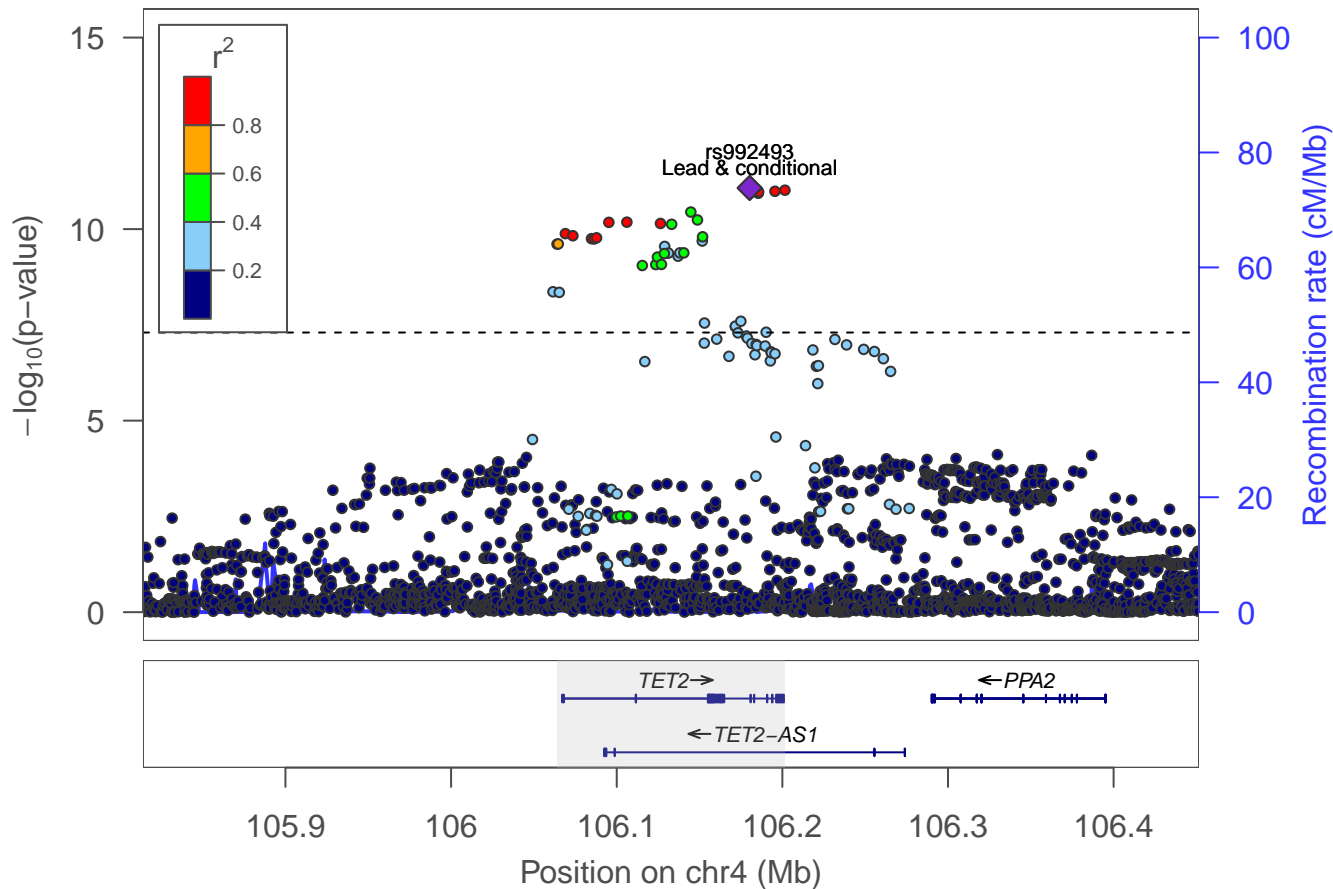



# General risk tolerance: locus 38 [chr 5:25.992–26.009Mb]

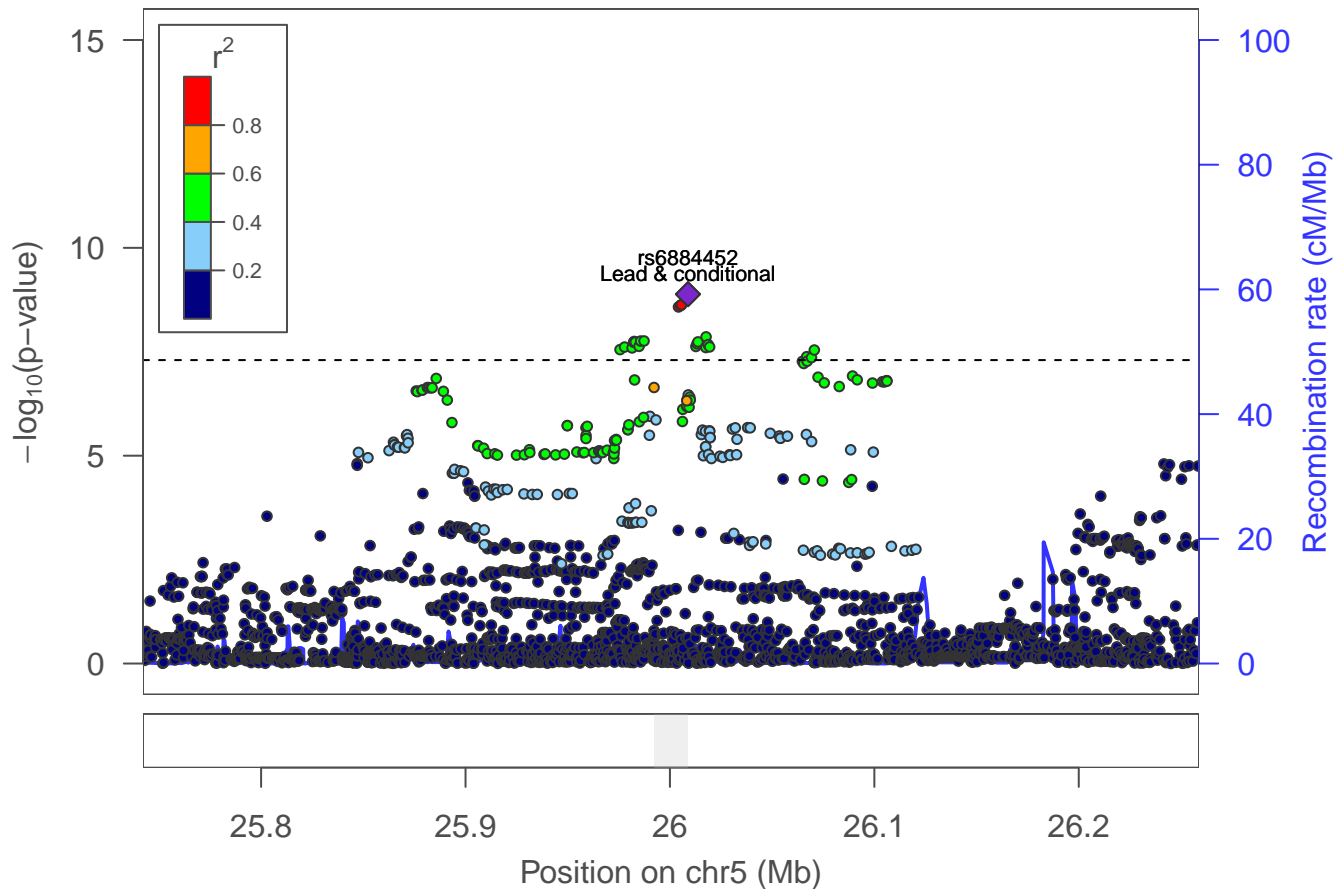

# General risk tolerance: locus 39 [chr 5:60.971–60.995Mb]

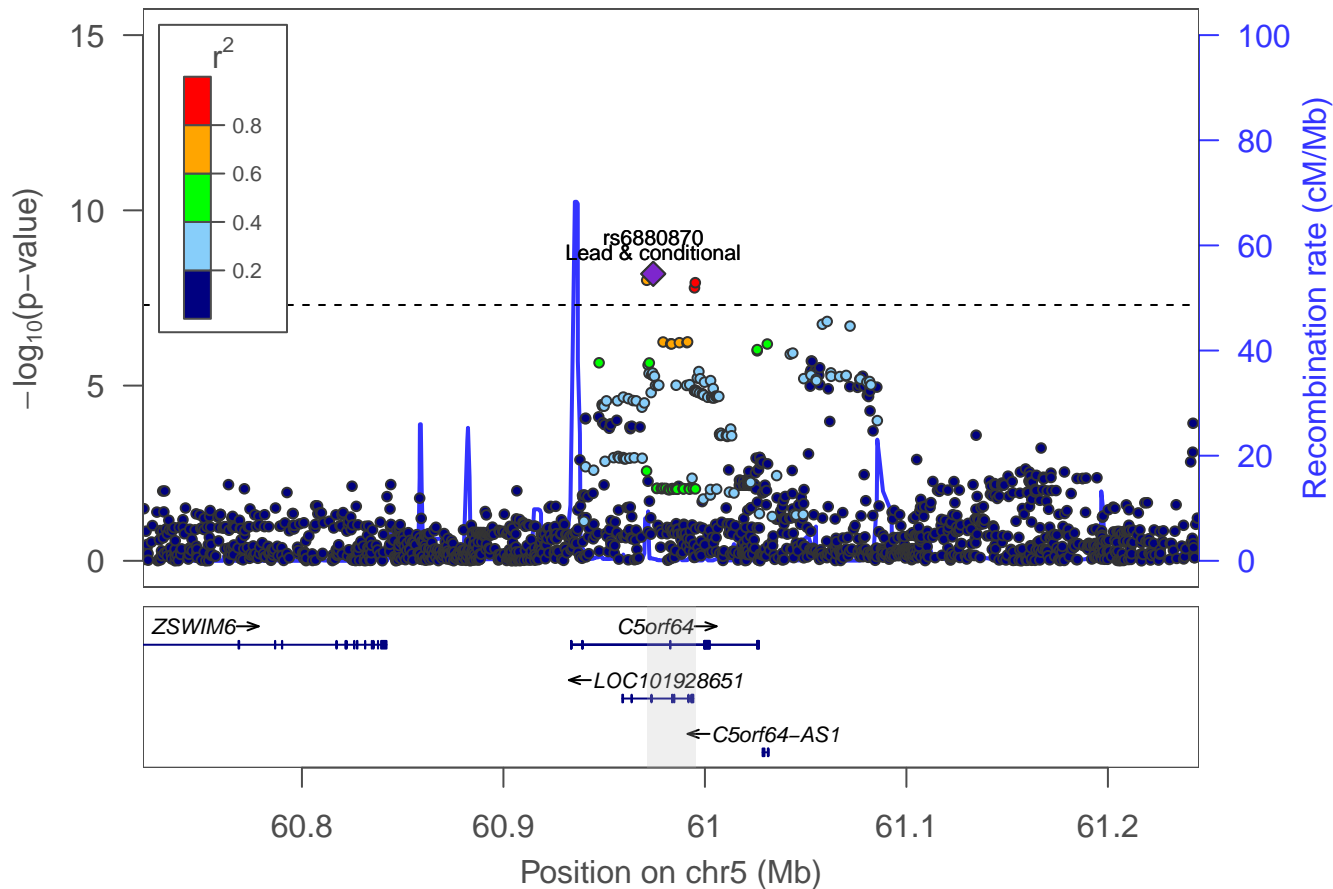

# General risk tolerance: locus 40 [chr 5:80.264–80.264Mb]

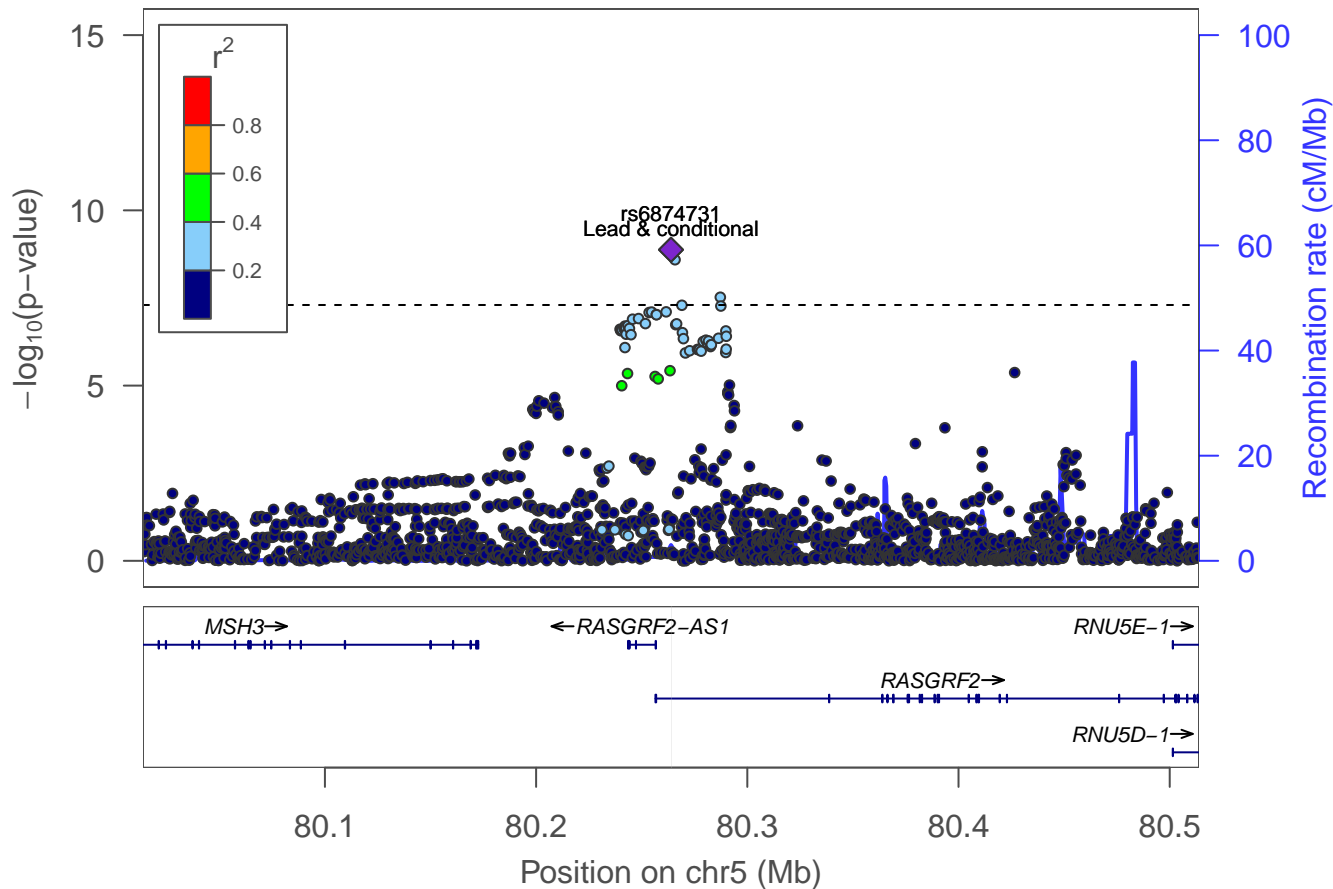

# General risk tolerance: locus 41 [chr 5:81.236–81.594Mb]

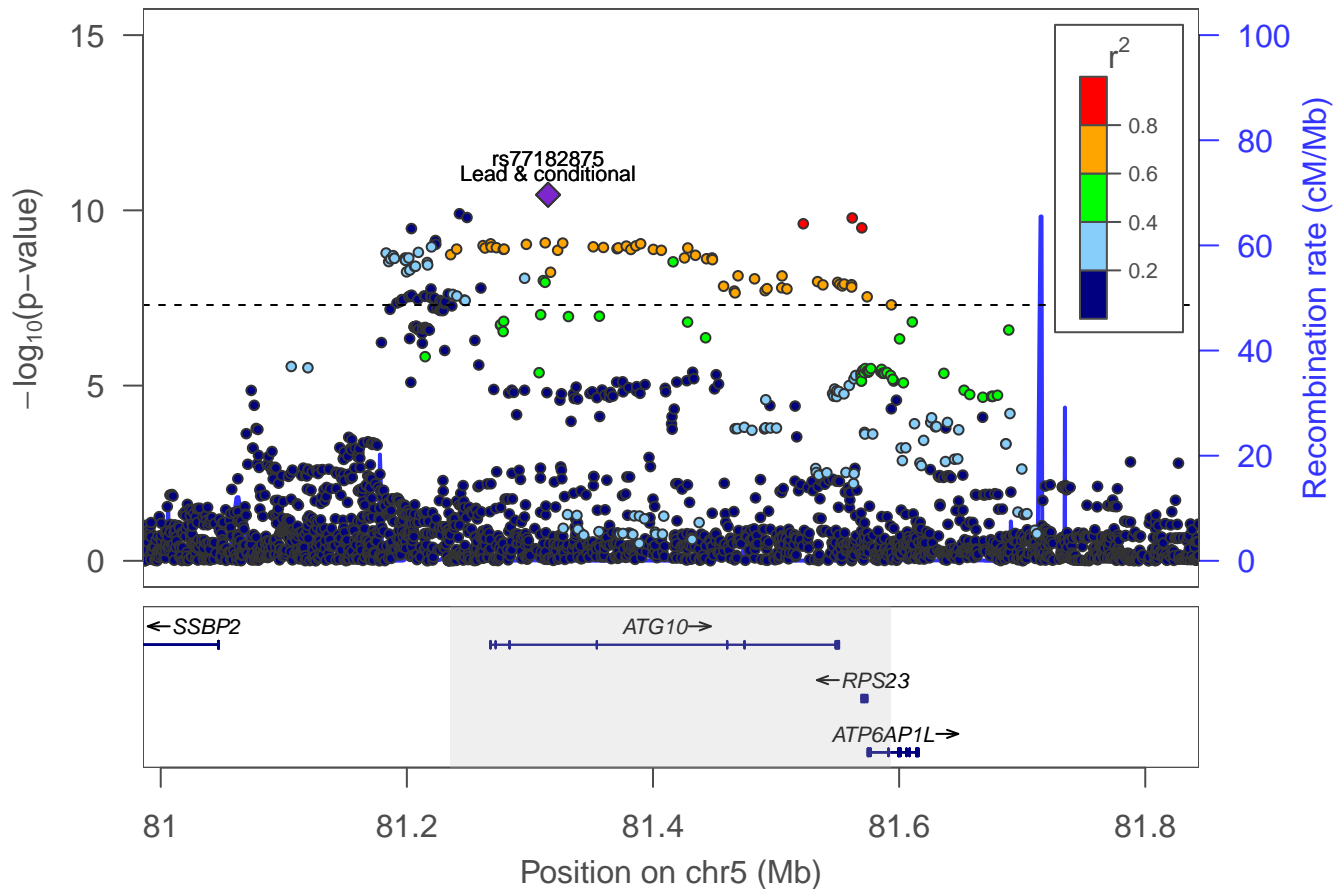

# General risk tolerance: locus 42 [chr 5:102.196–102.686Mb]

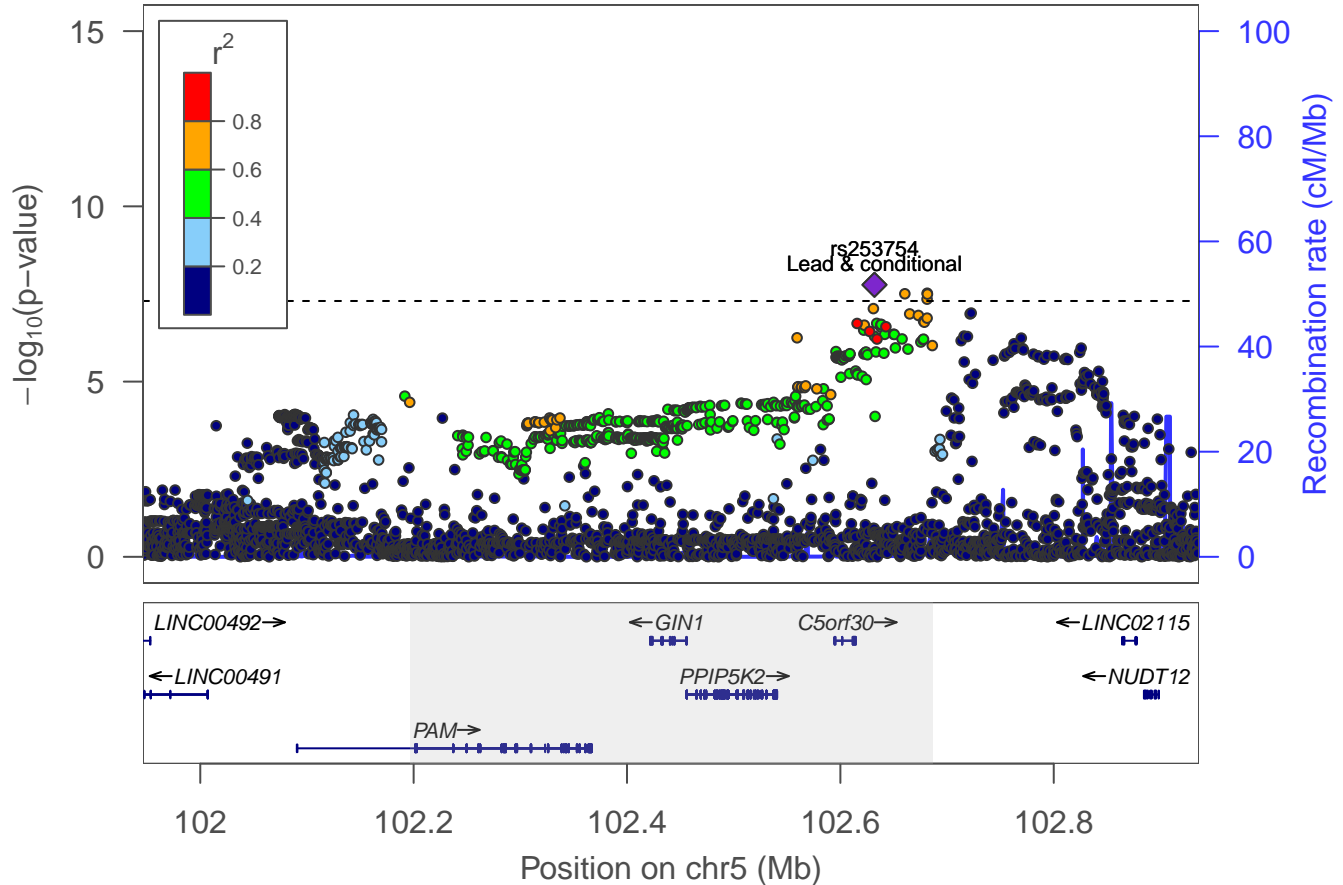

# General risk tolerance: Locus 43 [chr 5: 137.838–138.454Mb]

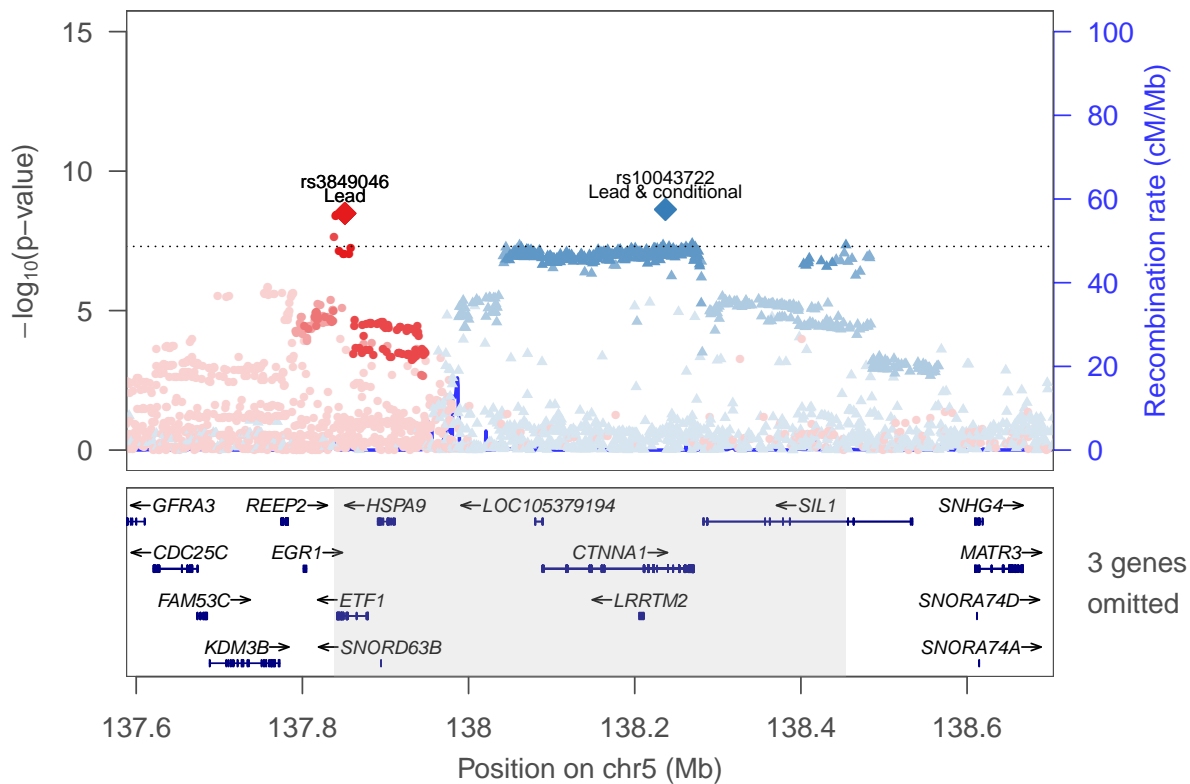

rs10043722 ▲  
 rs3849046 ●

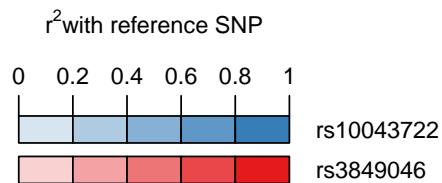

General risk tolerance: Locus 44 [chr 6: 25.976–26.328Mb]

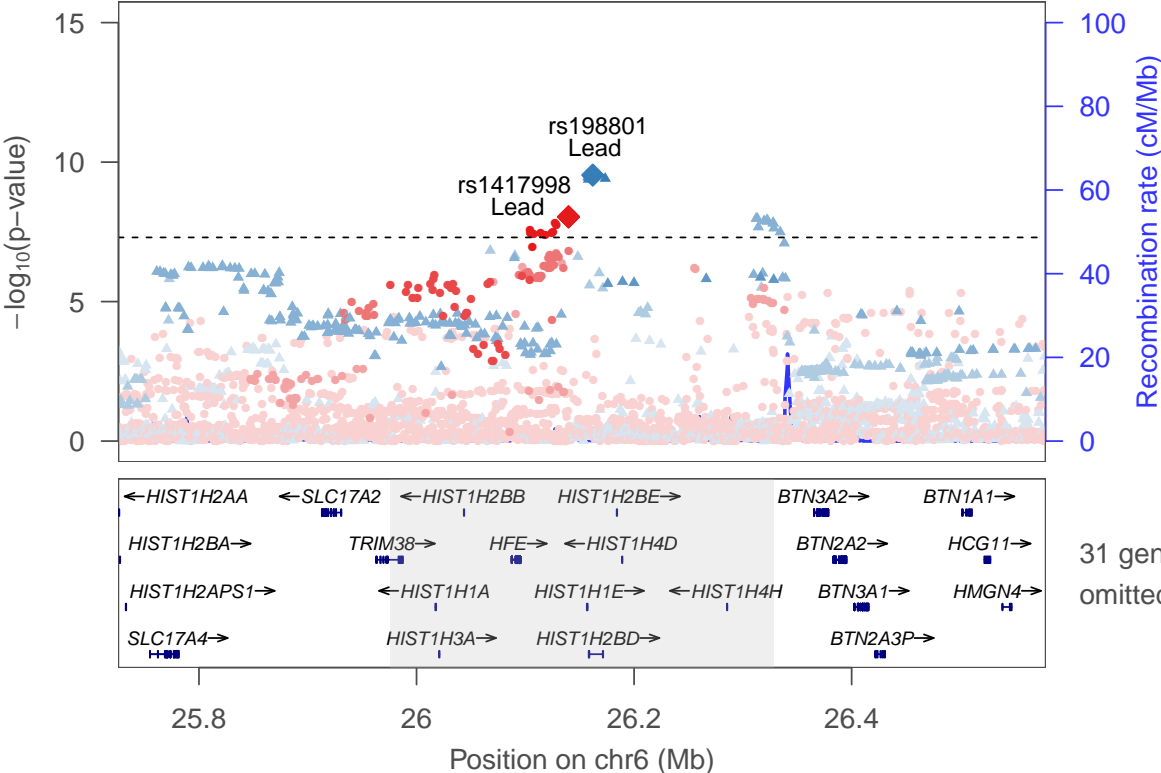

rs1417998 ▲  
rs198801 ●

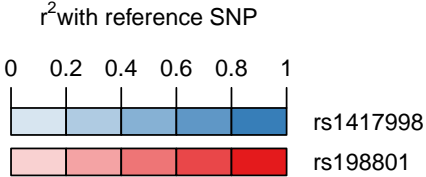

# General risk tolerance: locus 45 [chr 6:28.674–29.332Mb]

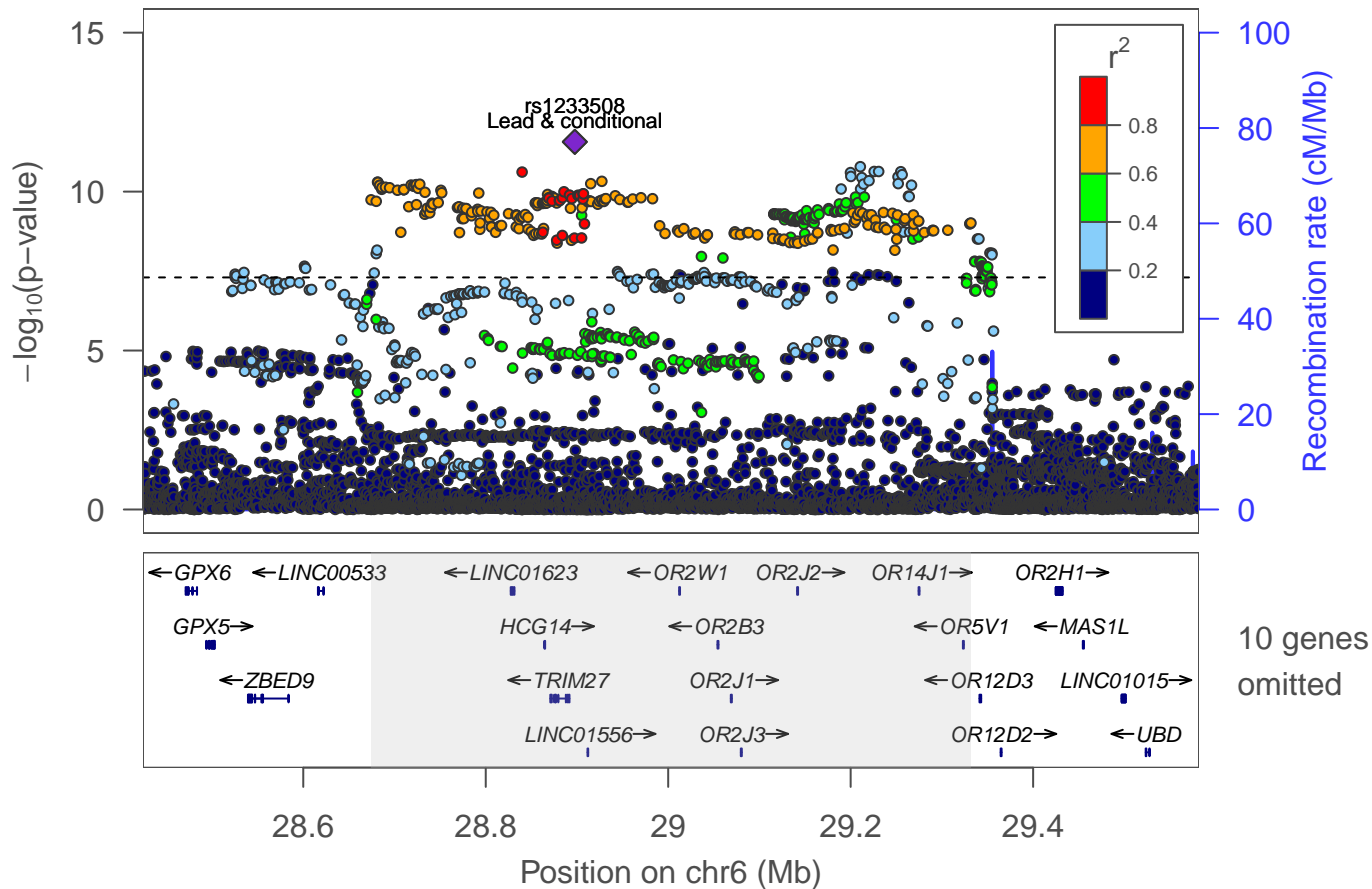



# General risk tolerance: locus 46 [chr 6:31.918–32.070Mb]

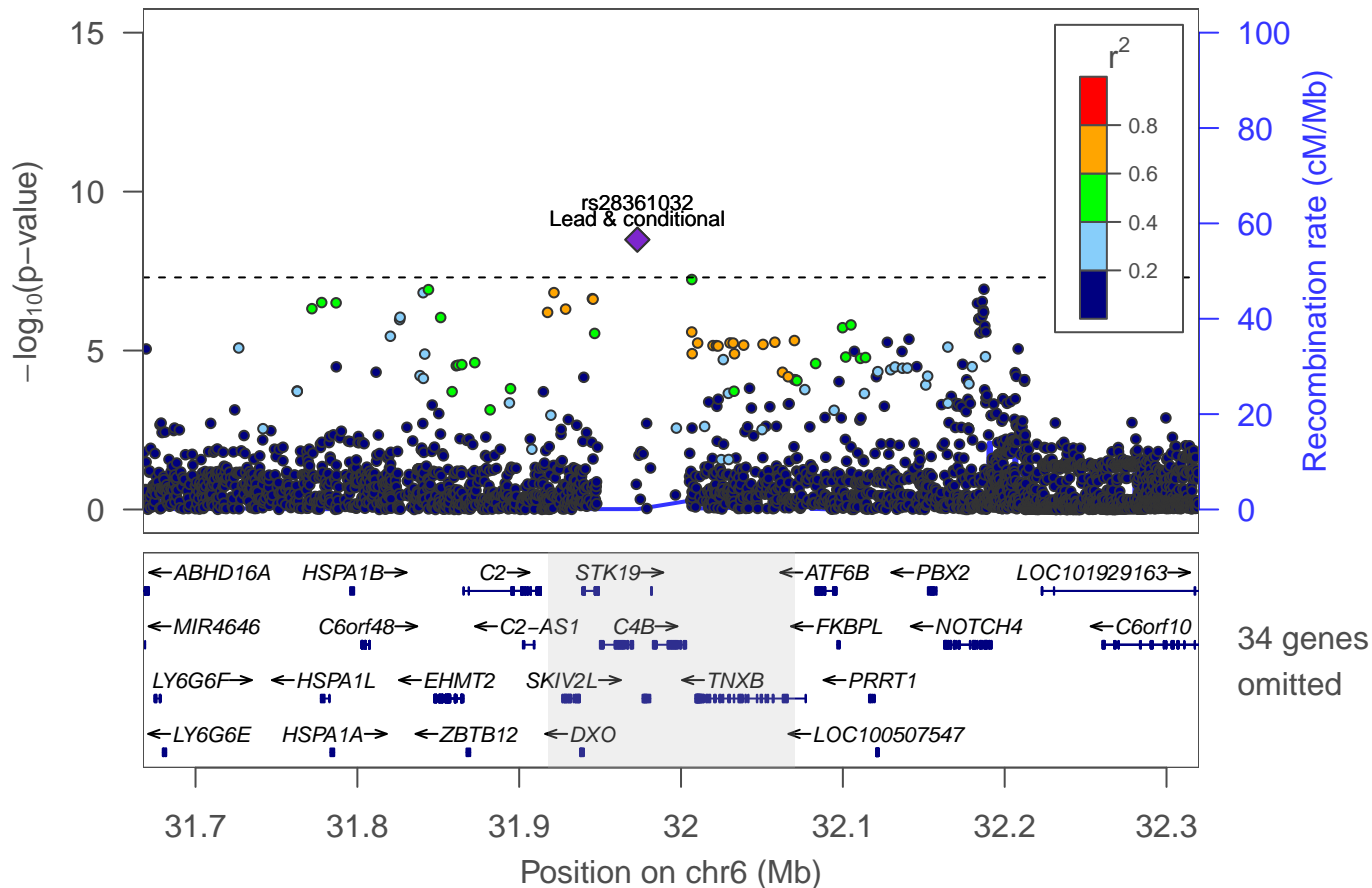

# General risk tolerance: locus 47 [chr 6:67.747–67.905Mb]

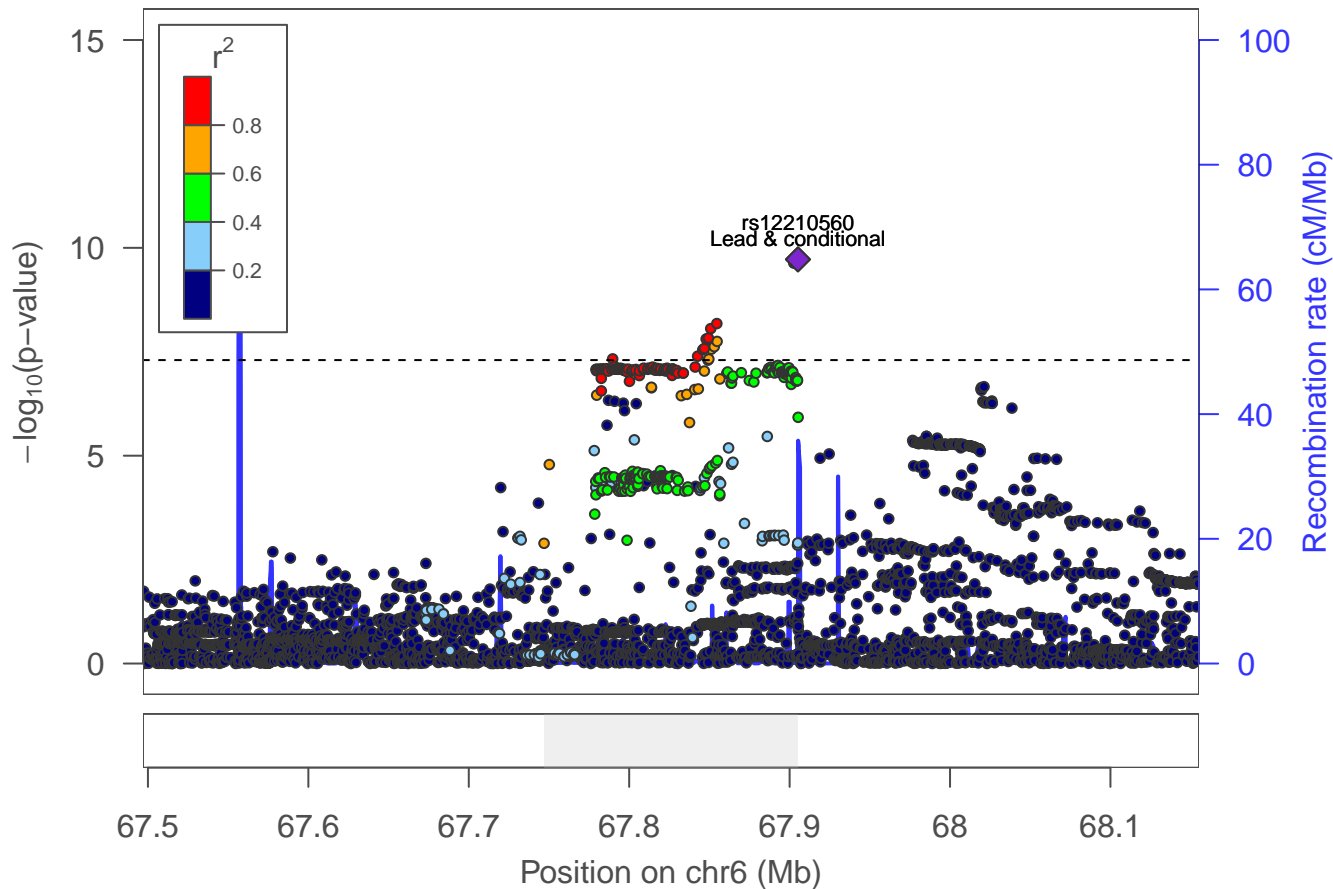

# General risk tolerance: locus 48 [chr 6:98.548–98.592Mb]

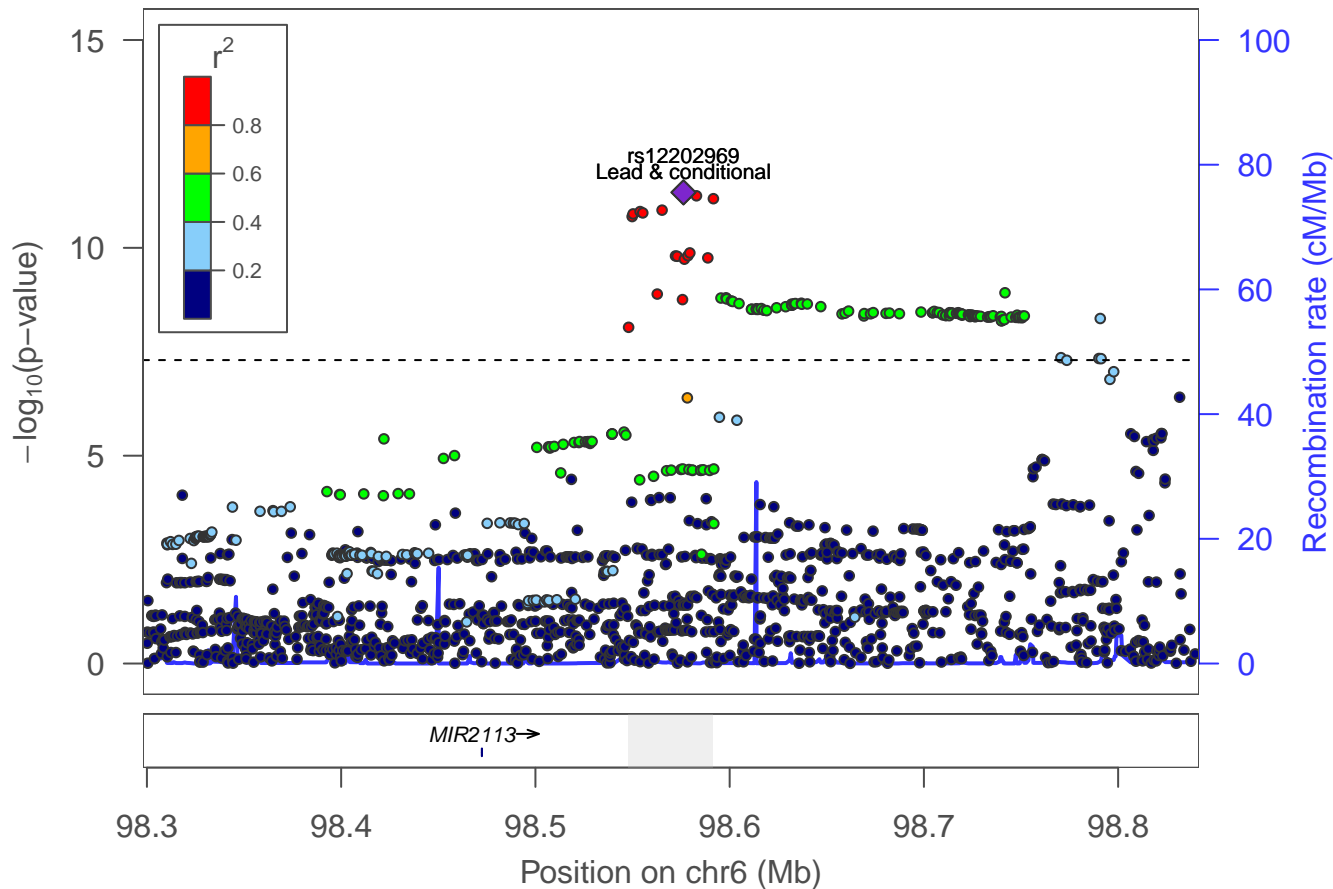

# General risk tolerance: locus 49 [chr 6:109.124–109.140Mb]

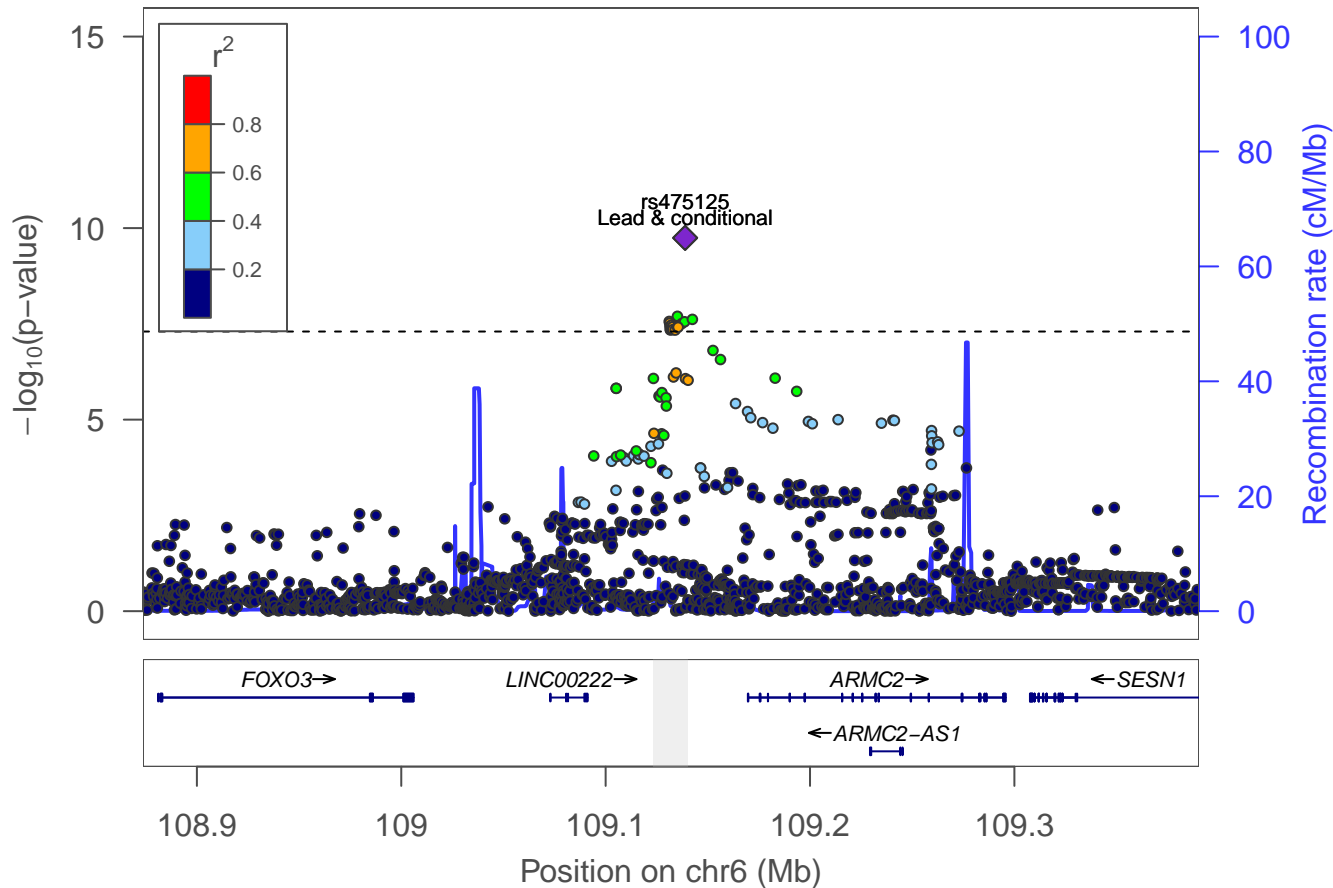

# General risk tolerance: locus 50 [chr 6:119.215–119.353Mb]

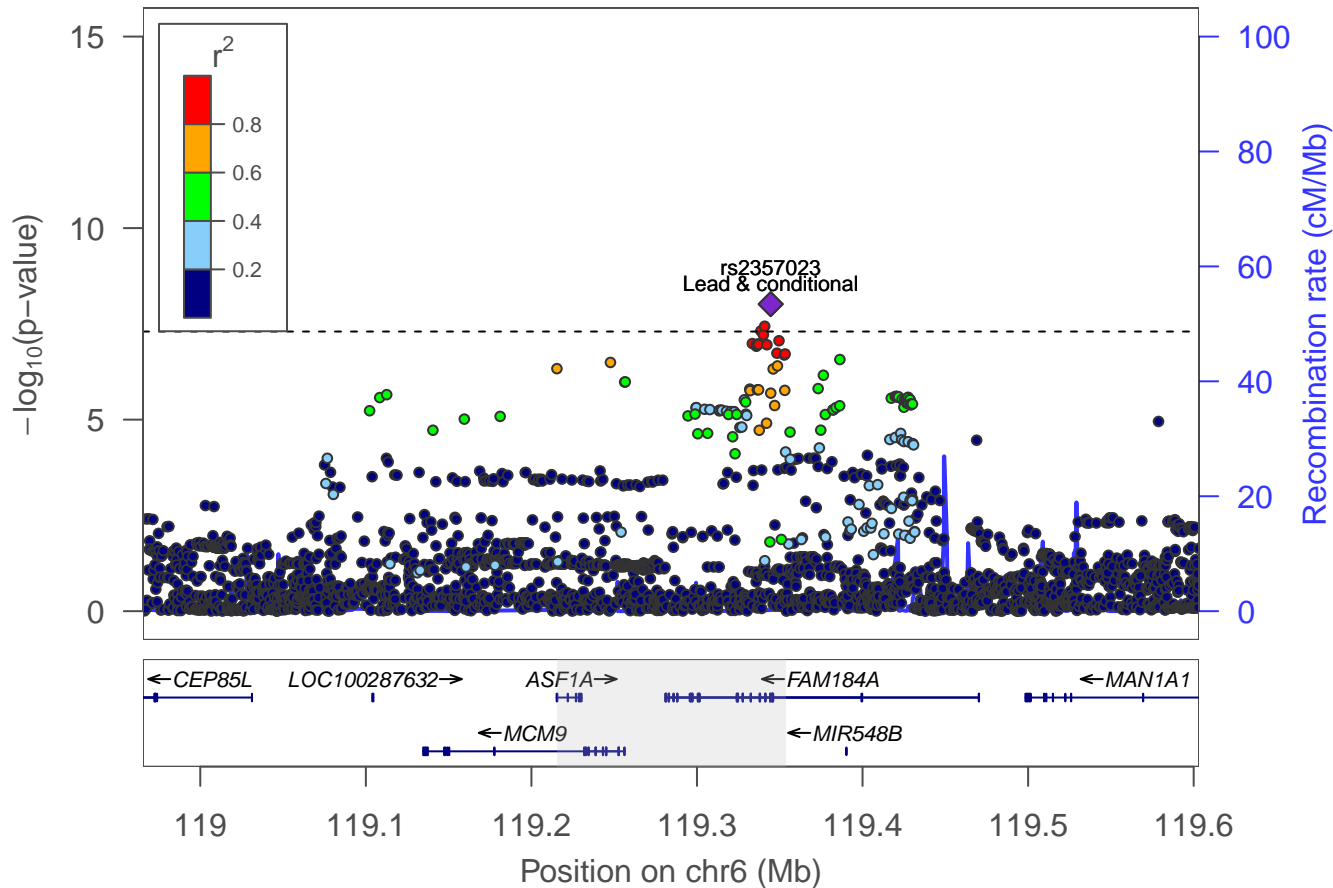

# General risk tolerance: locus 51 [chr 6:121.676–121.728Mb]

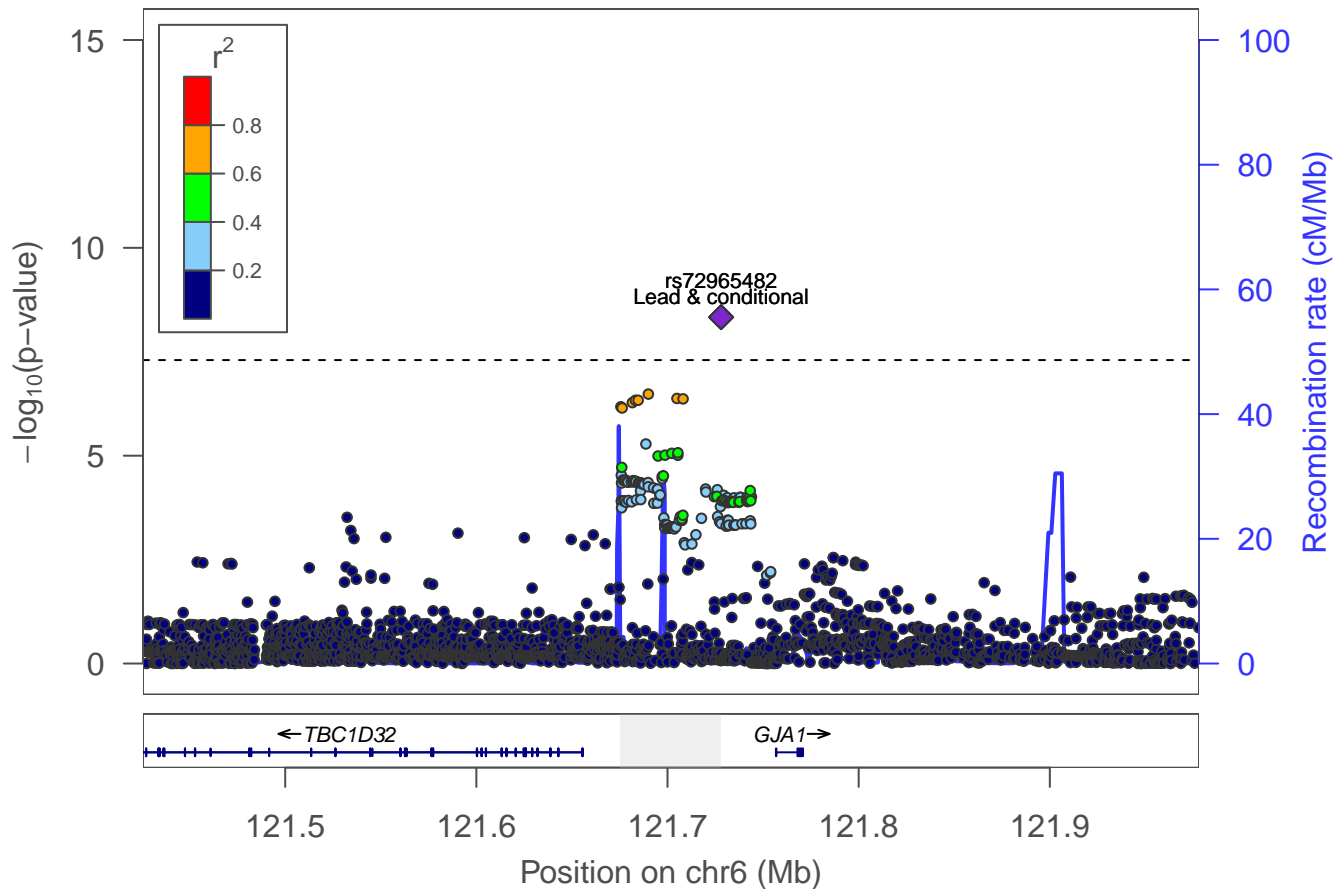

# General risk tolerance: locus 52 [chr 6:126.659–127.081Mb]

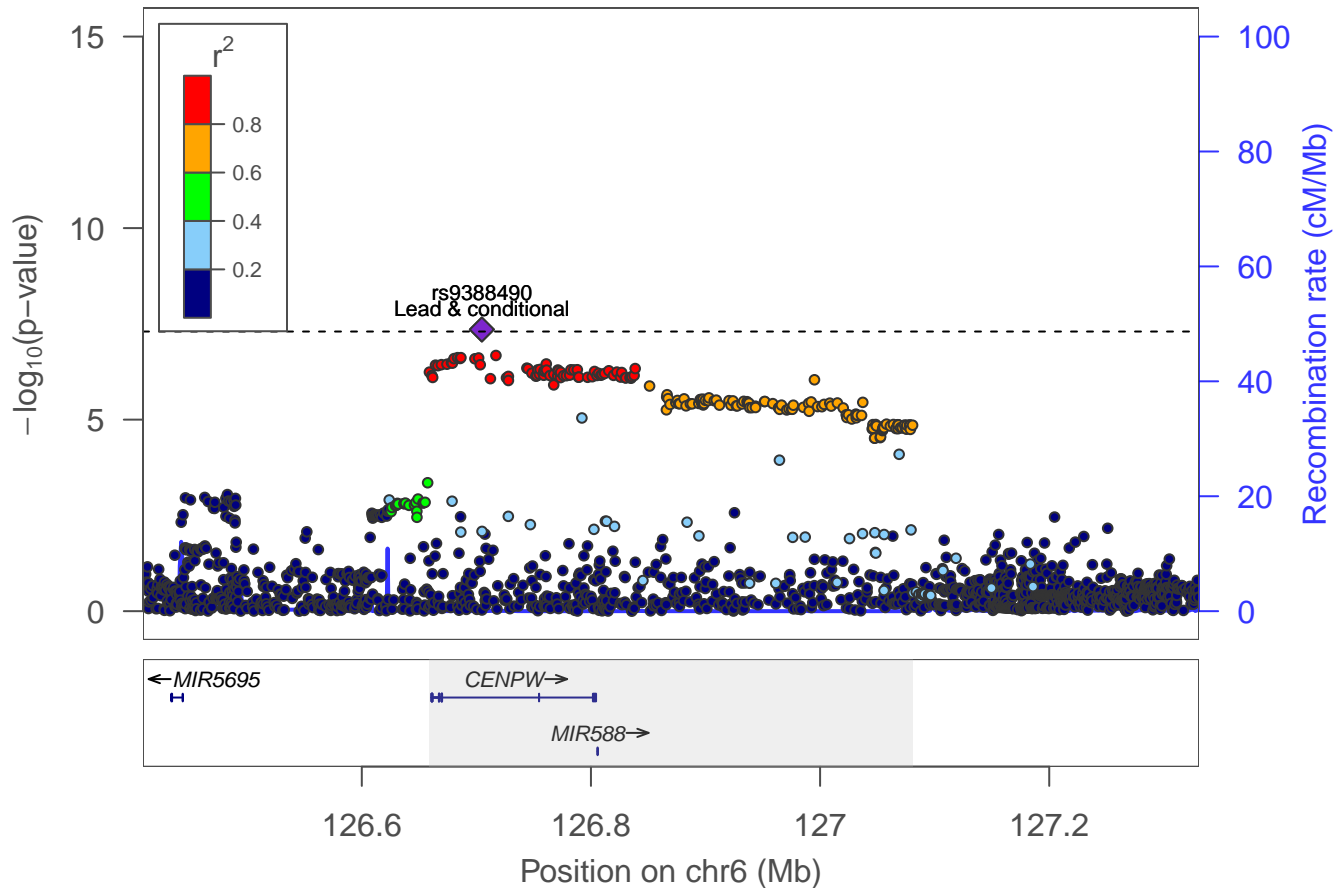

# General risk tolerance: locus 53 [chr 6:157.611–157.770Mb]

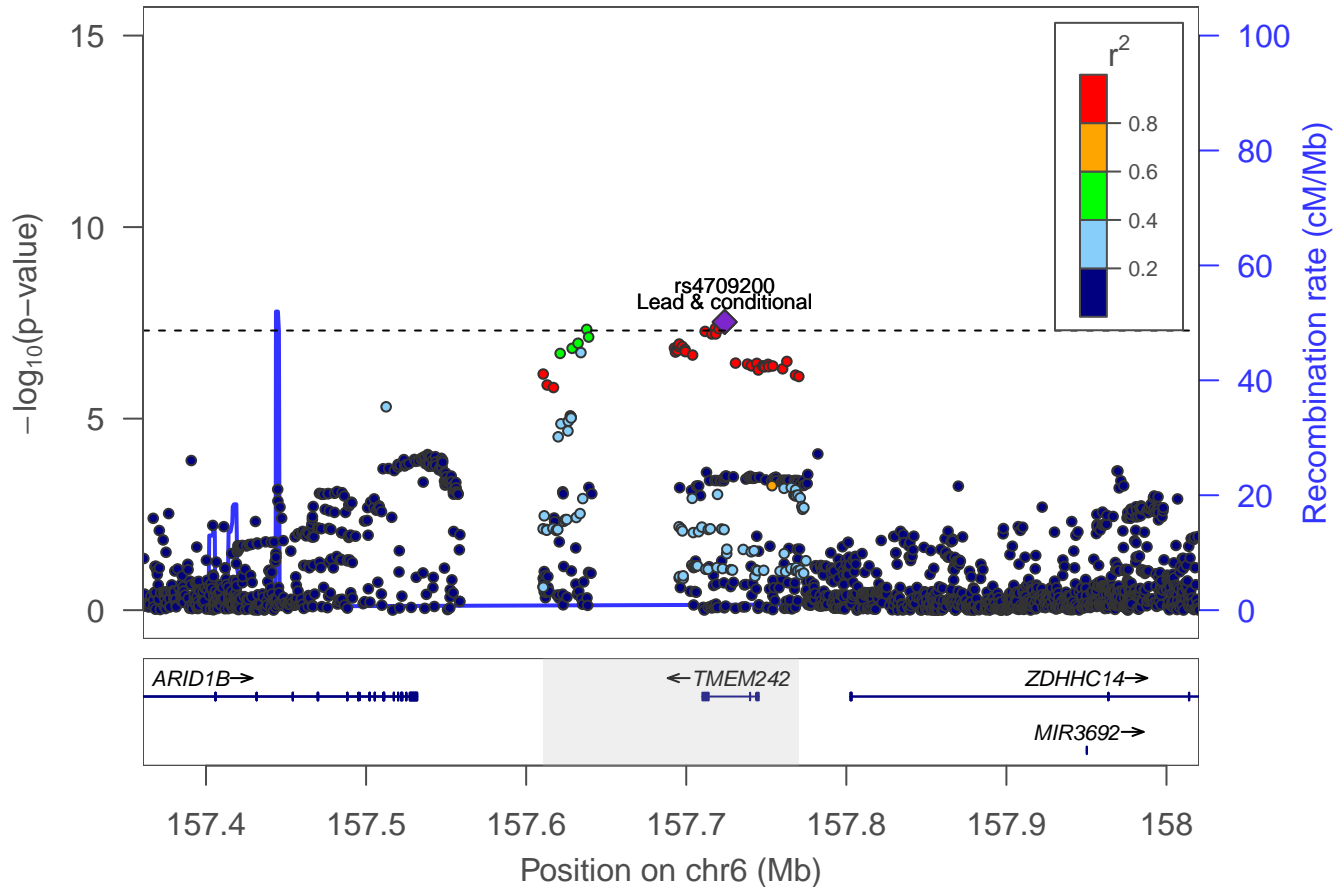



# General risk tolerance: locus 54 [chr 6:170.606–170.658Mb]

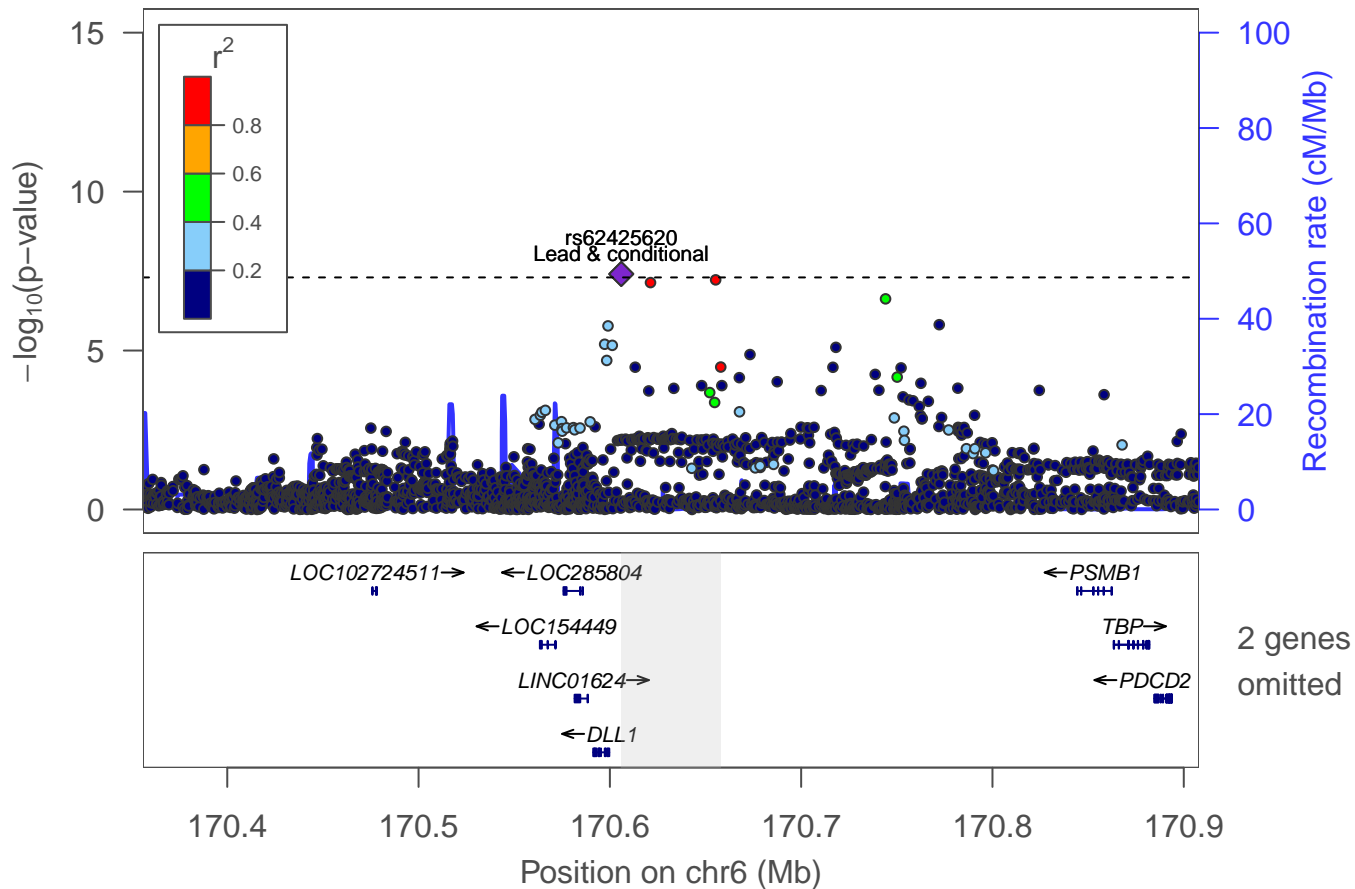

# General risk tolerance: locus 55 [chr 7:68.932–69.730Mb]

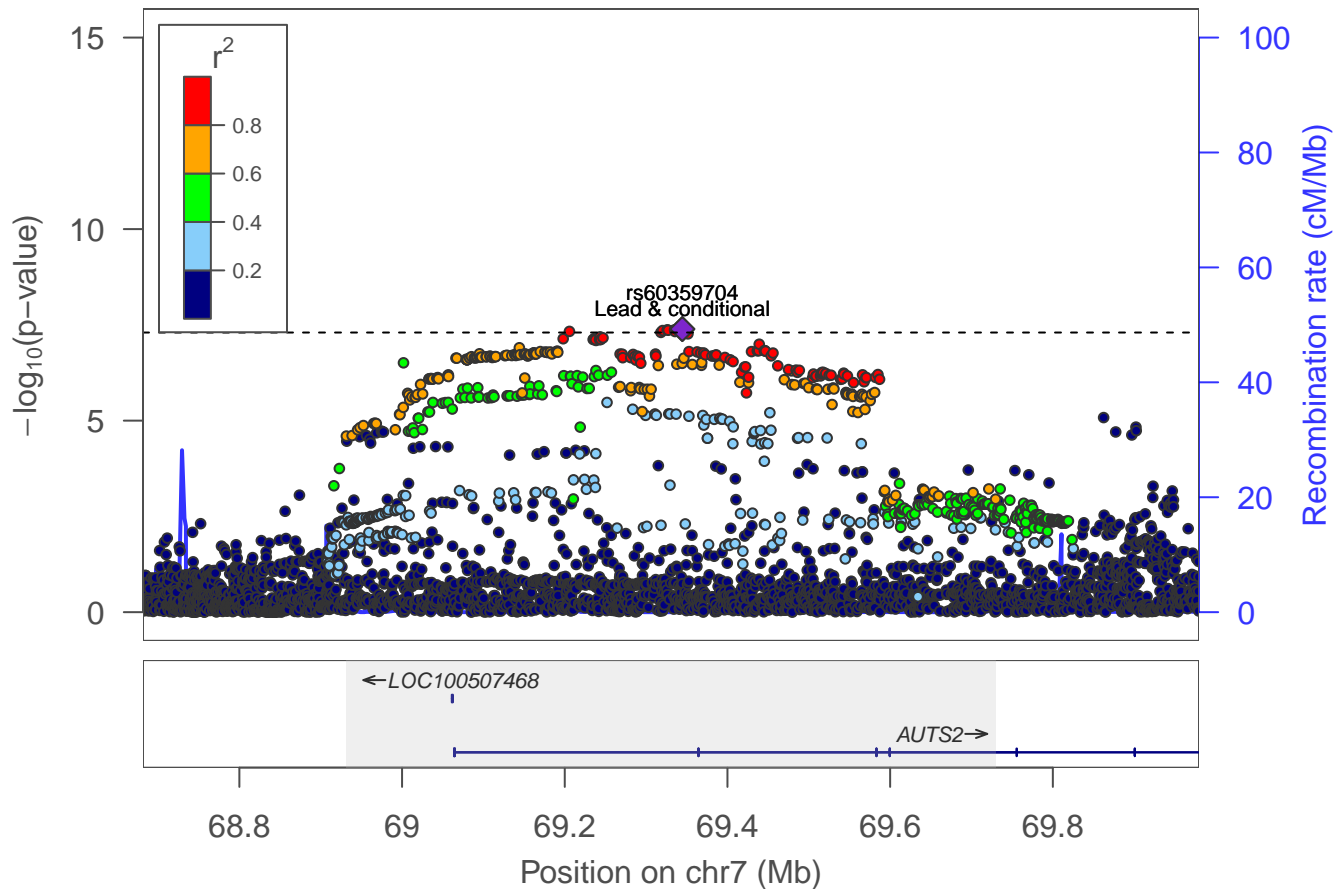

# General risk tolerance: locus 56 [chr 7:104.580–104.772Mb]

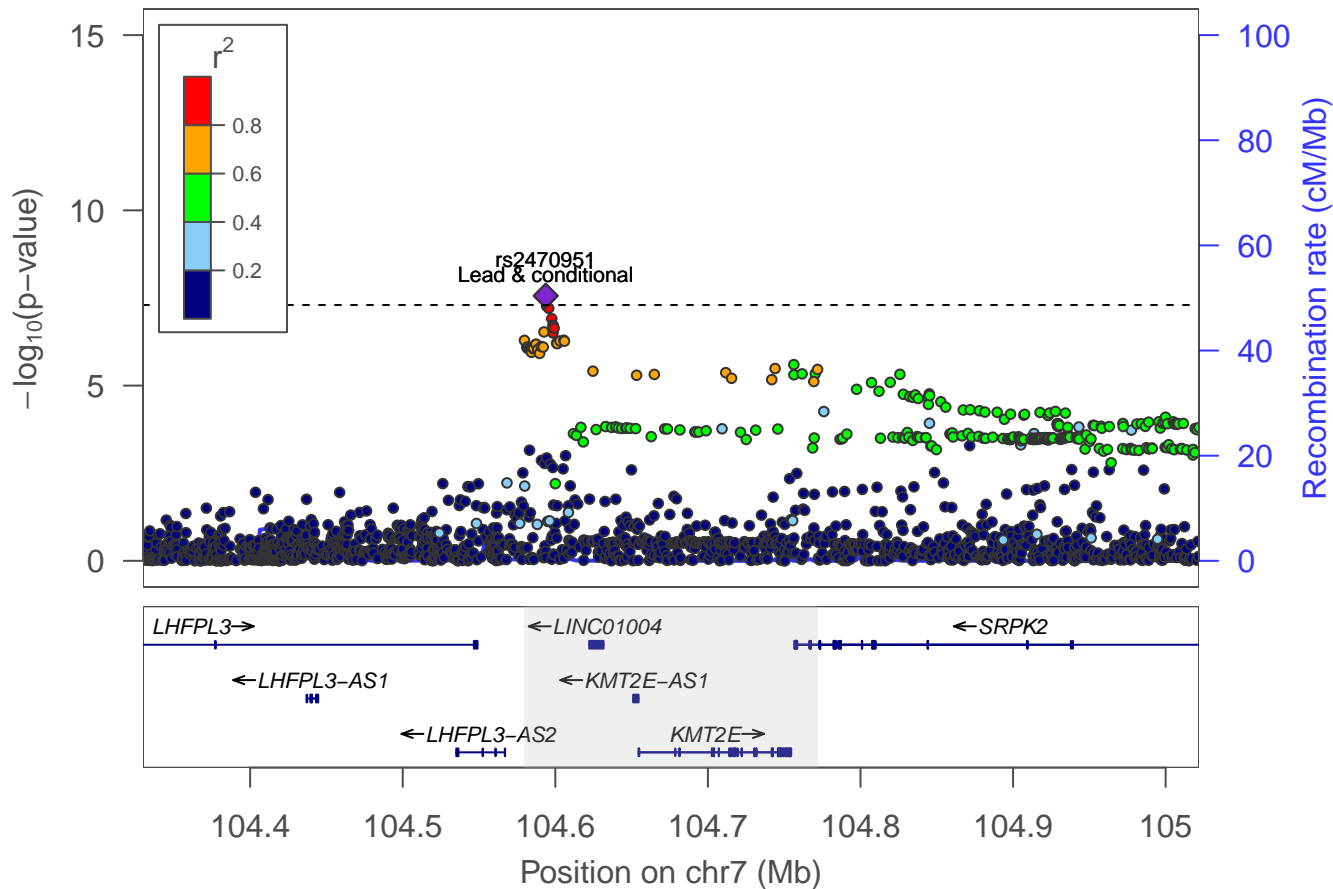

# General risk tolerance: Locus 57 [chr 7: 114.040–114.429Mb]

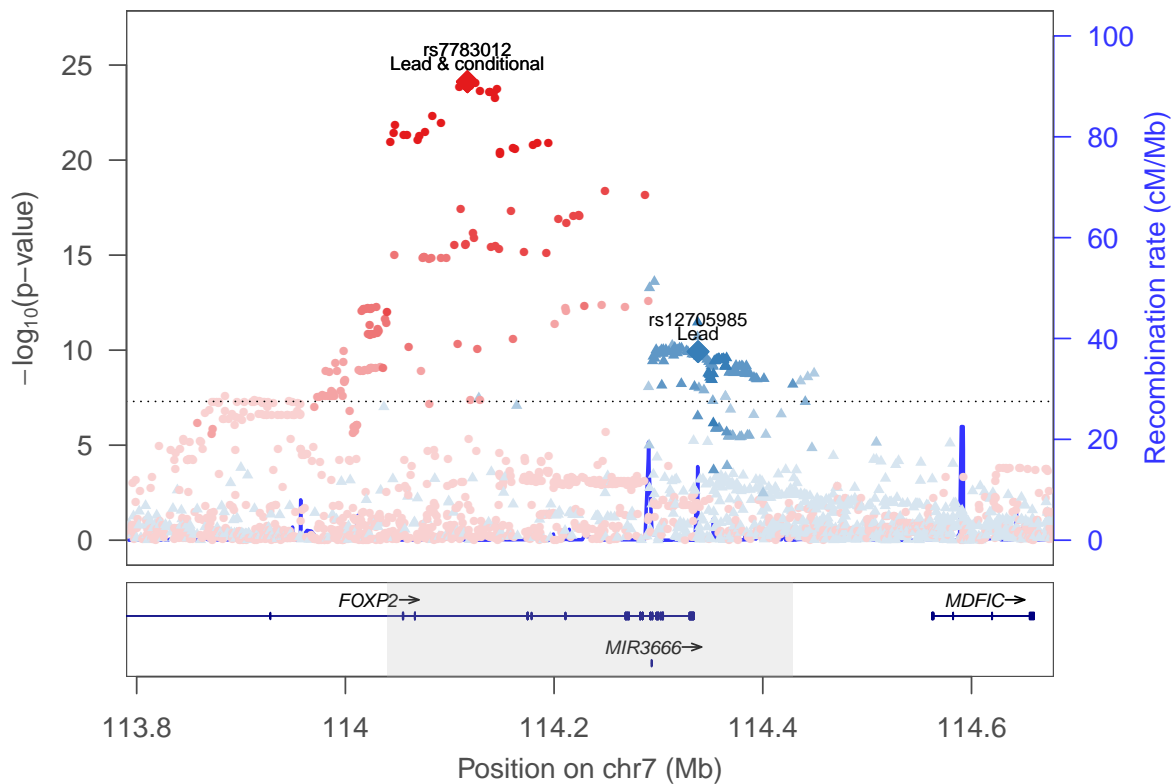

rs12705985 ▲  
rs7783012 ●

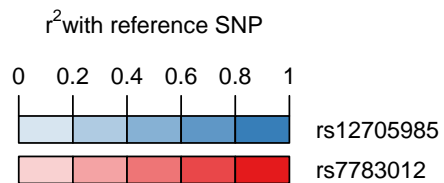

# General risk tolerance: Locus 58 [chr 7: 114.942–115.113Mb]

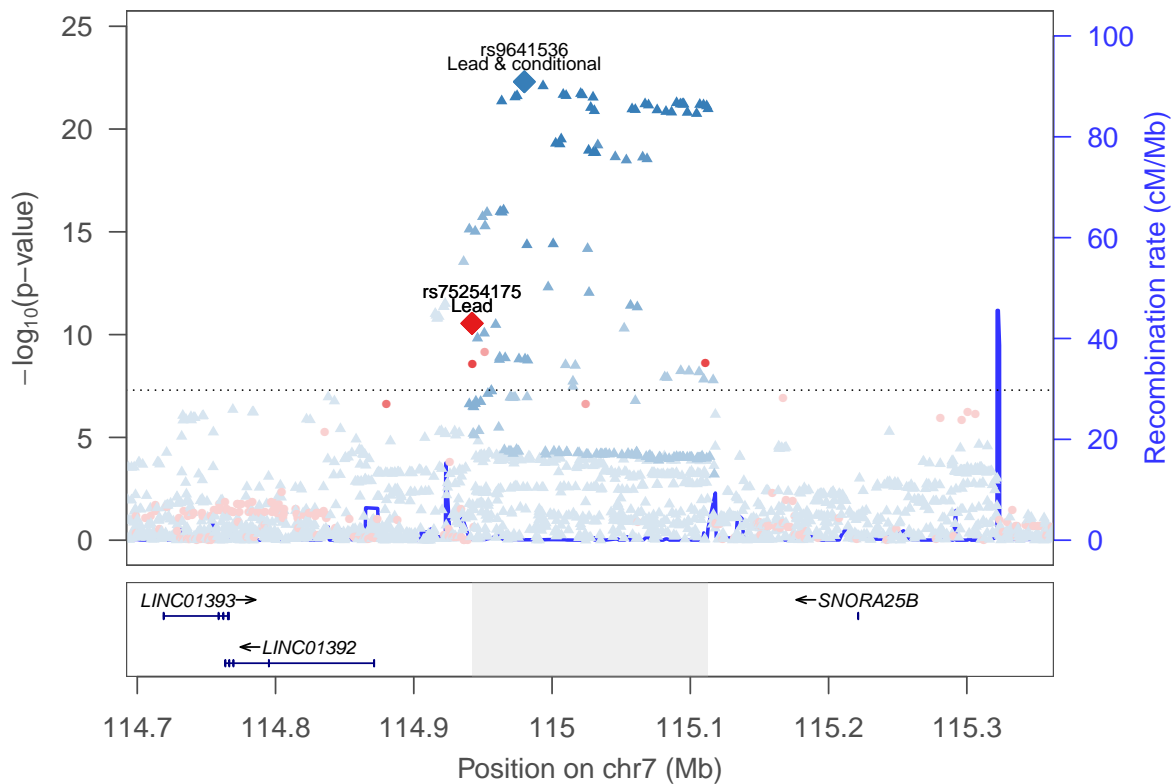

rs9641536 ▲  
rs75254175 ●

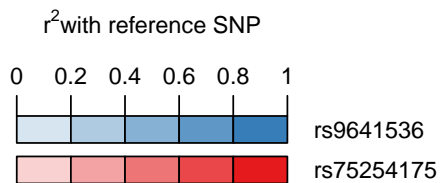

# General risk tolerance: locus 59 [chr 7:127.082–127.210Mb]

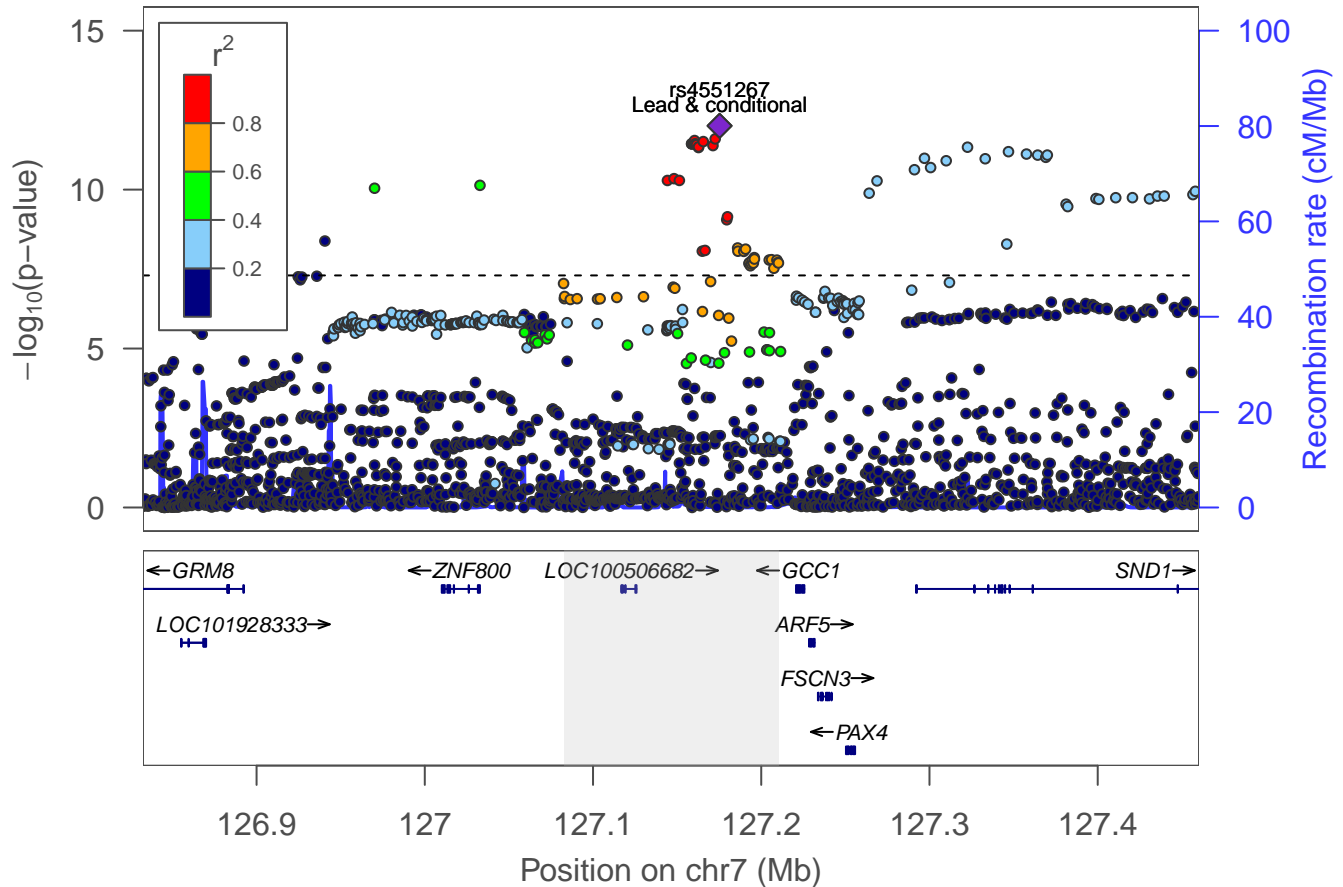

# General risk tolerance: Locus 60 [chr 8: 8.225–8.732Mb]

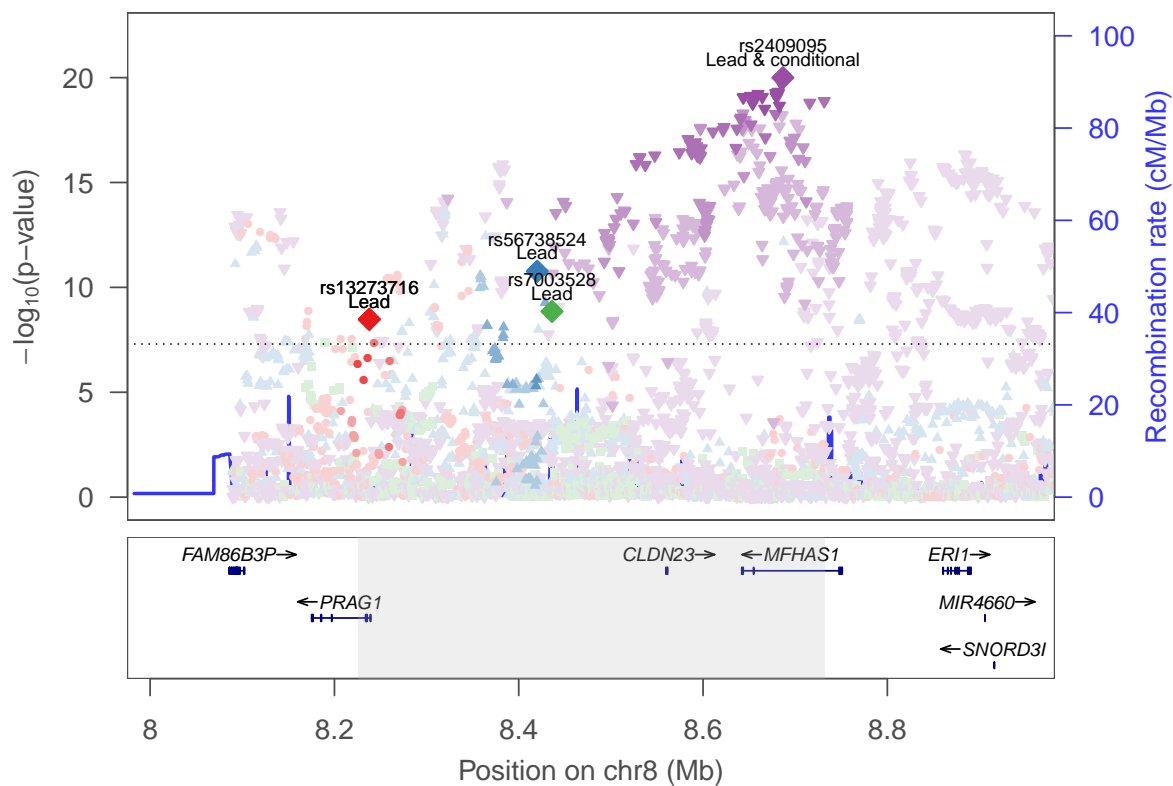

rs2409095    ▾  
 rs7003528    ■  
 rs56738524    ▲  
 rs13273716    ●

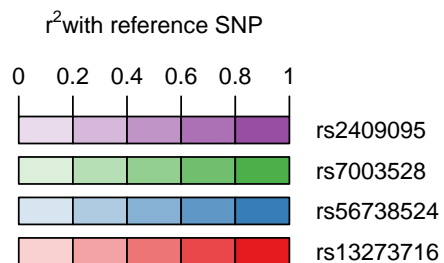

# General risk tolerance: locus 61 [chr 8:9.141–9.141Mb]

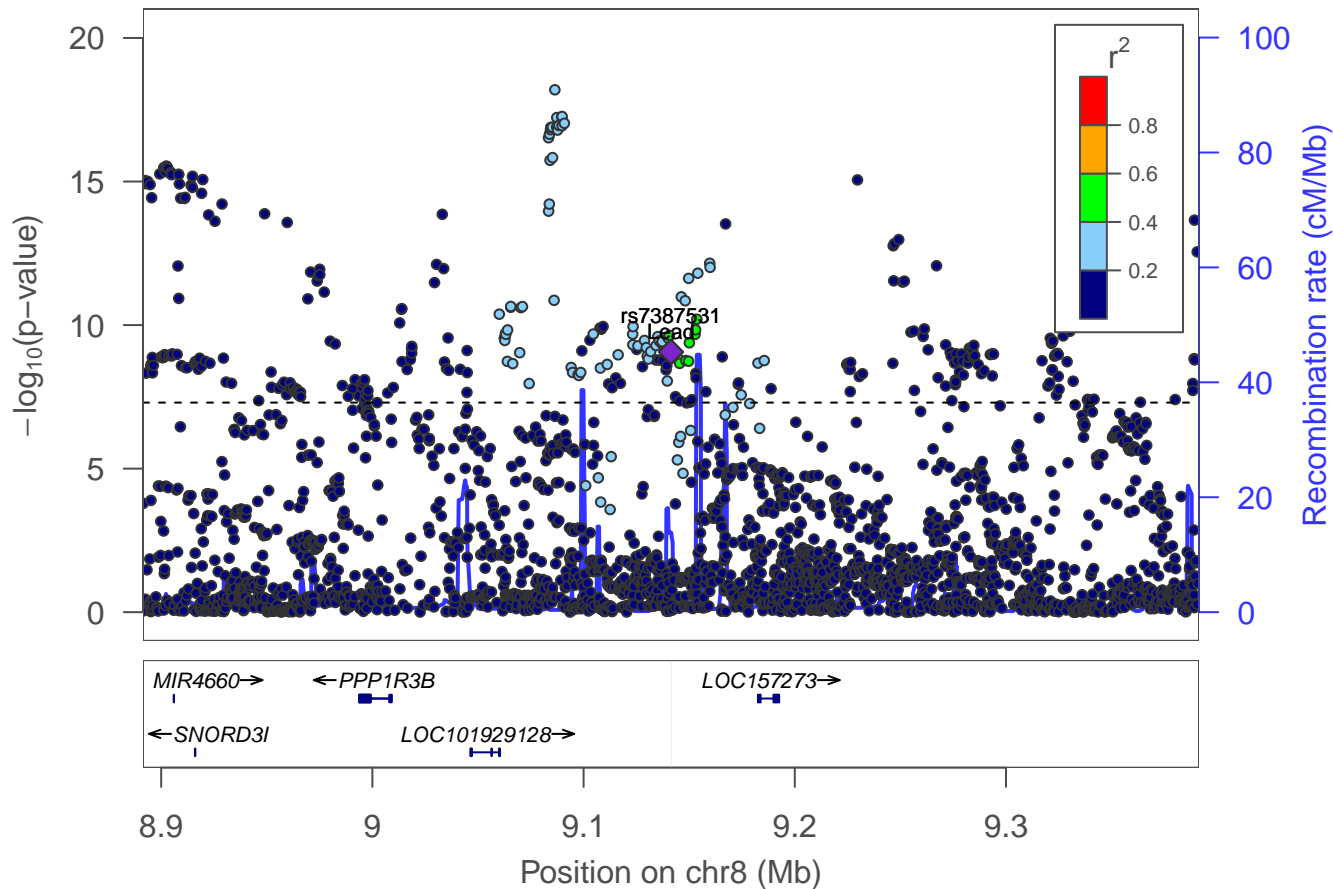



# General risk tolerance: Locus 62 [chr 8: 9.394–9.498Mb]

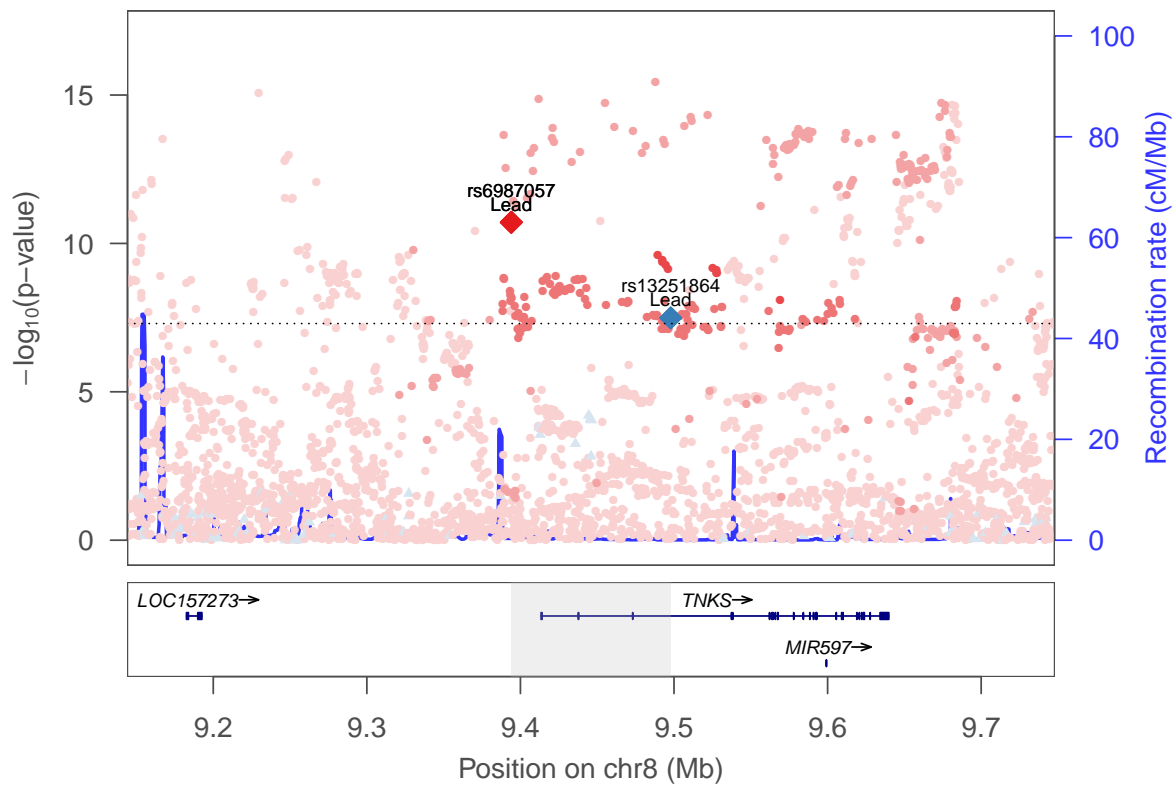

rs13251864 ▲  
rs6987057 ●

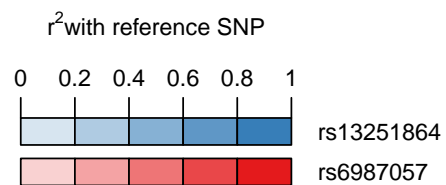

# General risk tolerance: Locus 63 [chr 8: 10.381–10.905Mb]

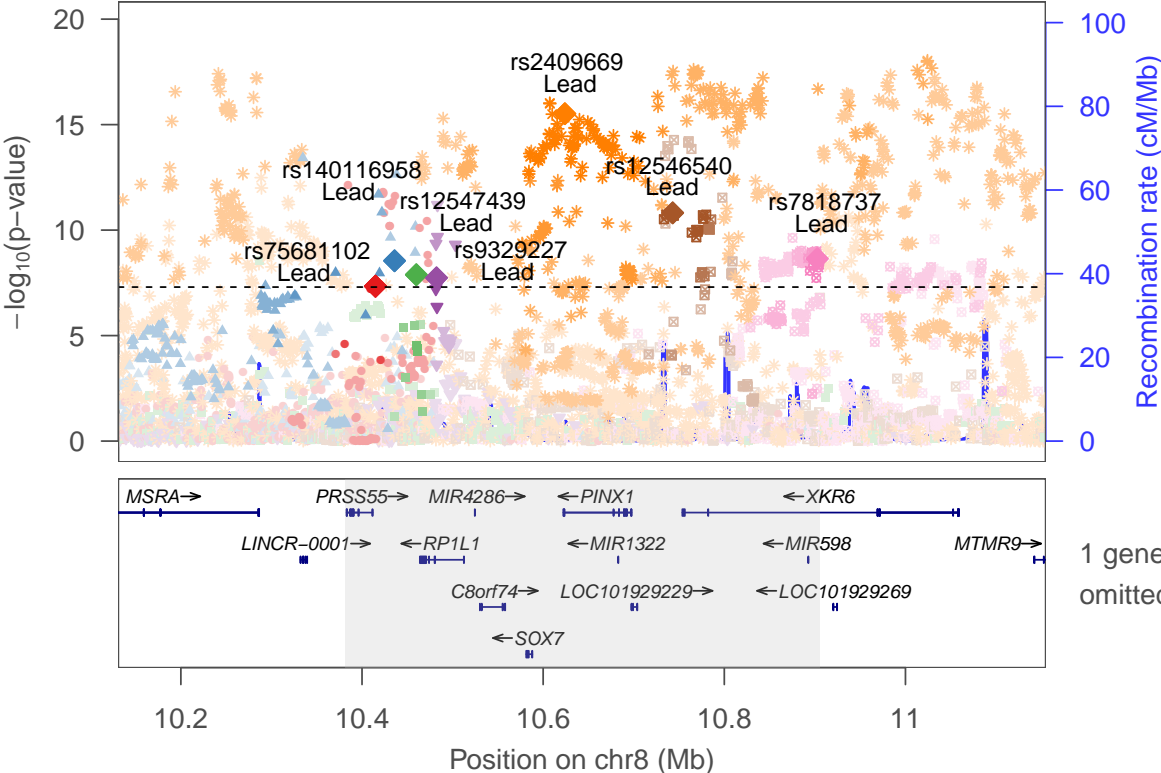

- rs7818737 ⊠
- rs12546540 ⊠
- rs2409669 ✱
- rs9329227 ▼
- rs12547439 ■
- rs140116958 ▲
- rs75681102 ●

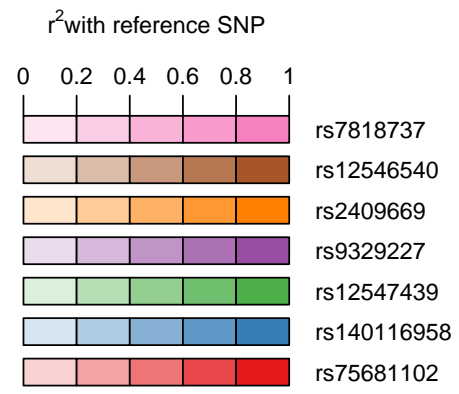

# General risk tolerance: locus 64 [chr 8:11.568–11.581Mb]

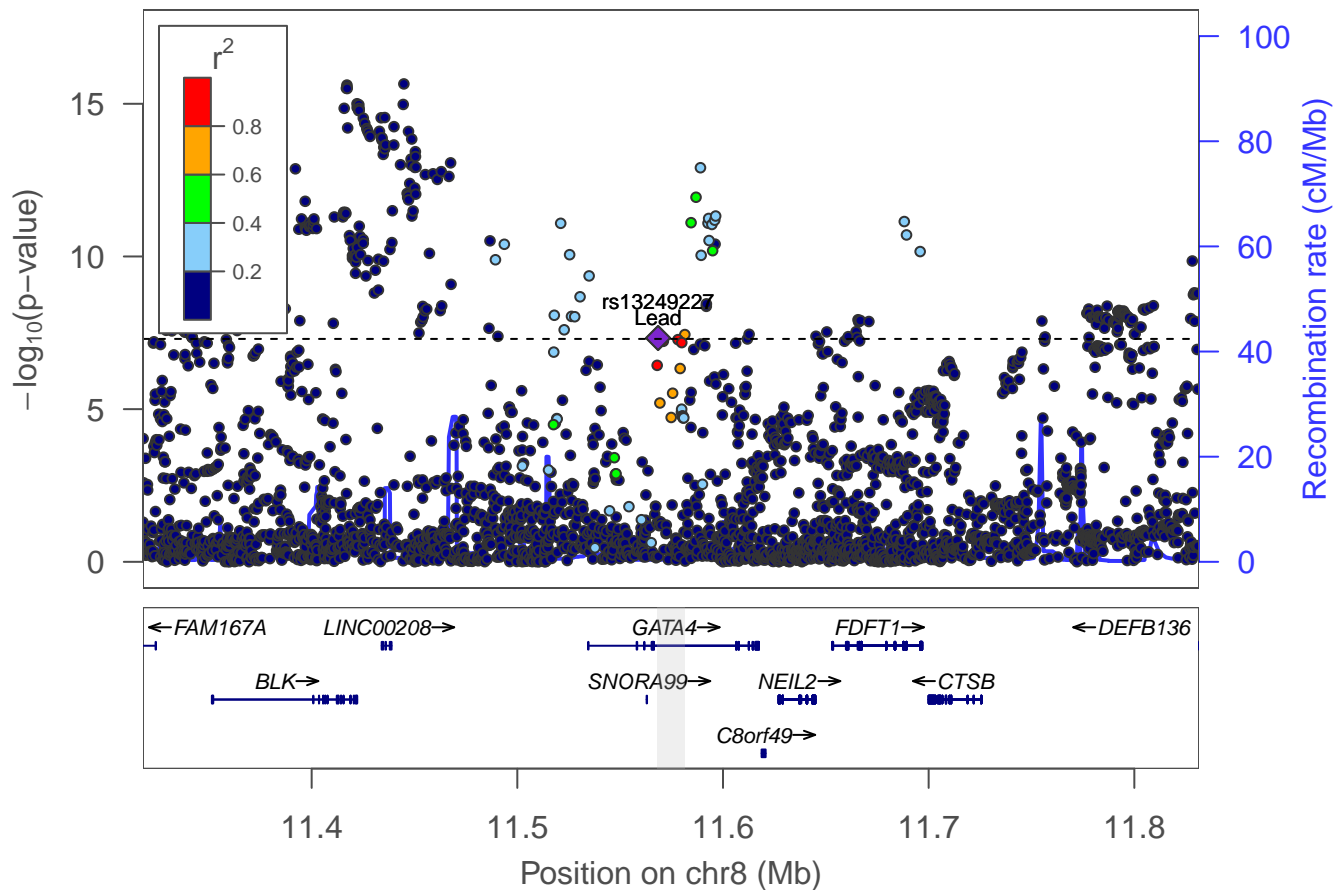

# General risk tolerance: locus 65 [chr 8:53.116–53.227Mb]

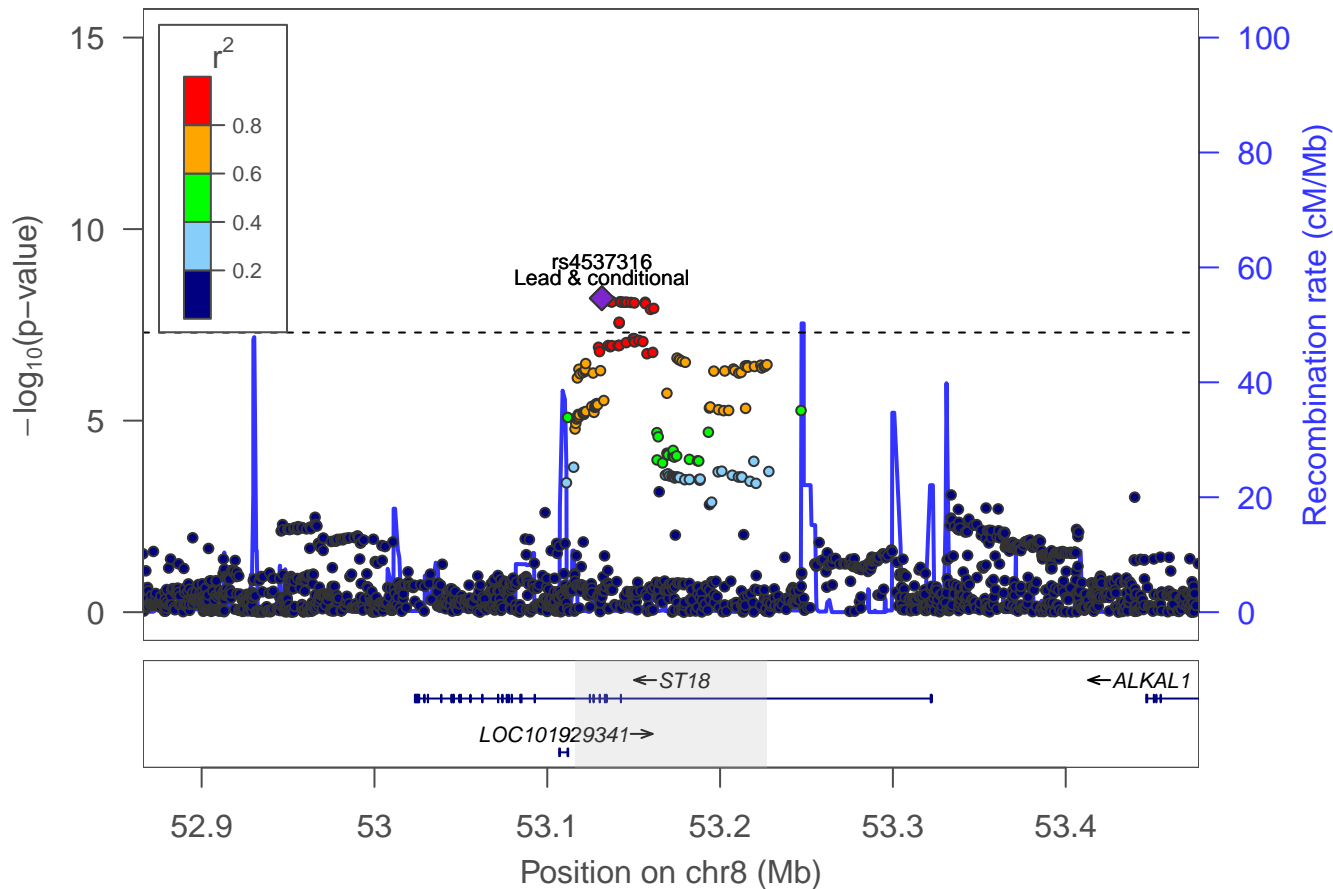

# General risk tolerance: locus 66 [chr 8:65.438–65.534Mb]

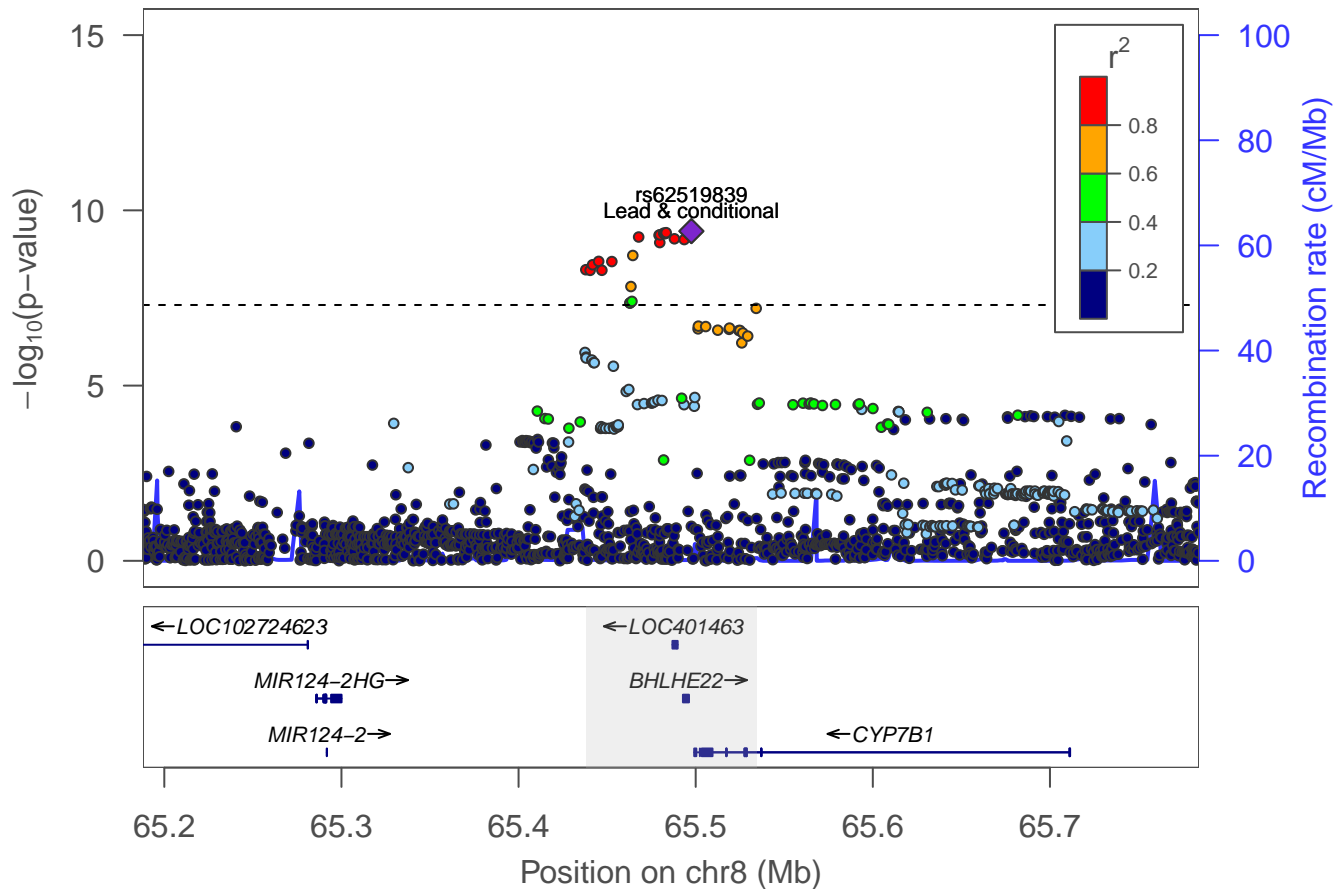

# General risk tolerance: locus 67 [chr 8:81.358–81.441Mb]

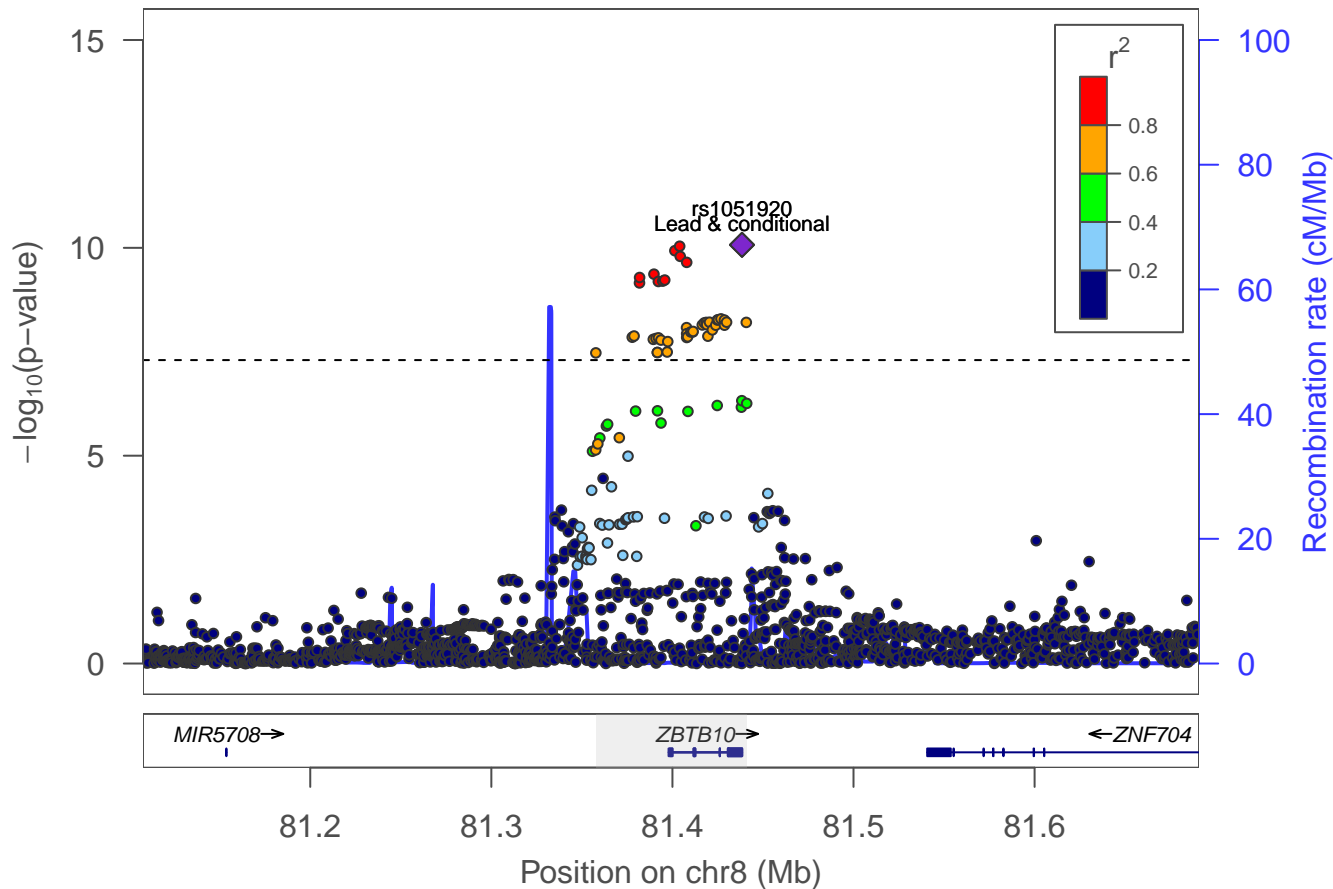

# General risk tolerance: locus 68 [chr 8:101.934–101.999Mb]

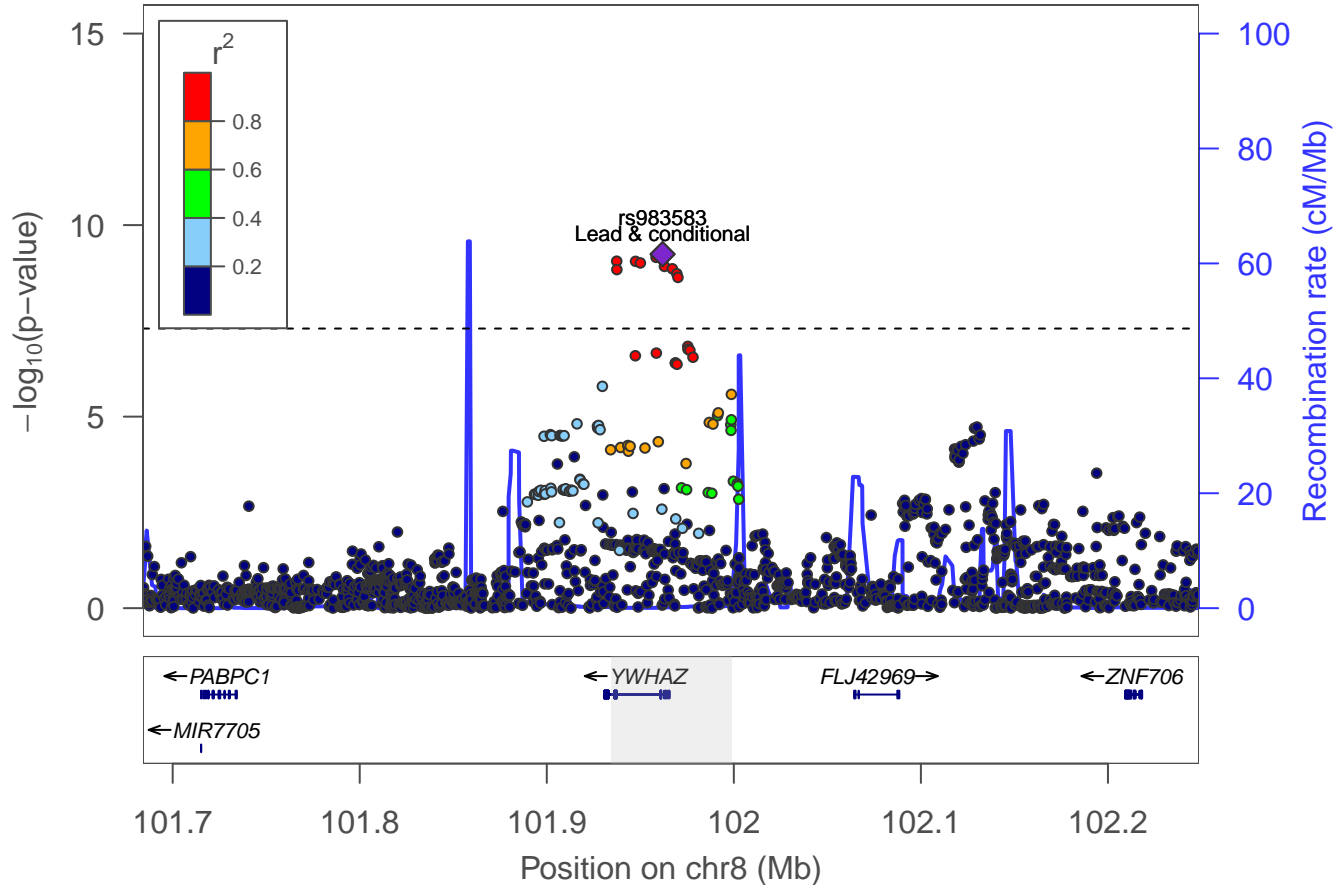

# General risk tolerance: locus 69 [chr 9:126.197–126.262Mb]

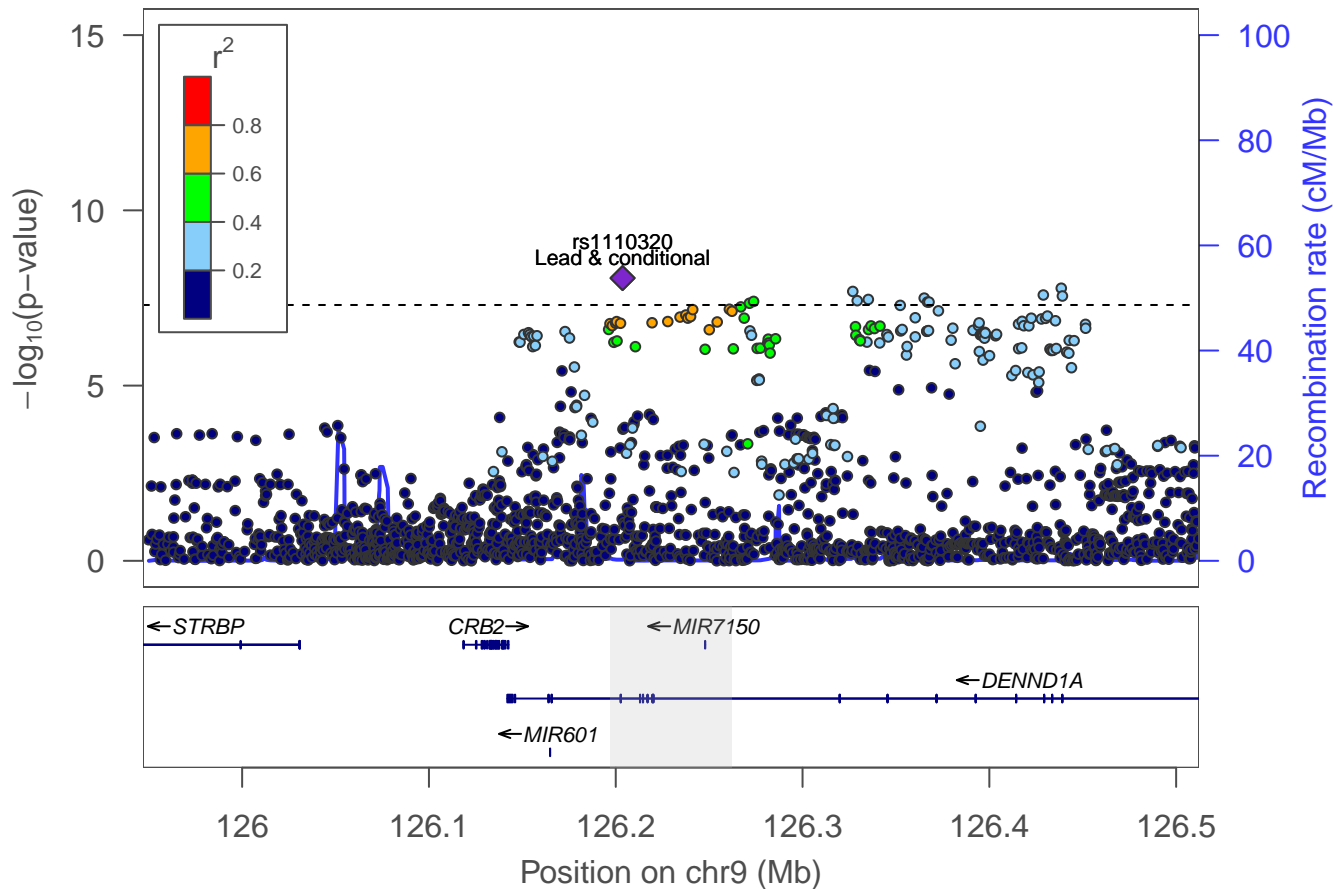



# General risk tolerance: locus 70 [chr 10:8.779–8.853Mb]

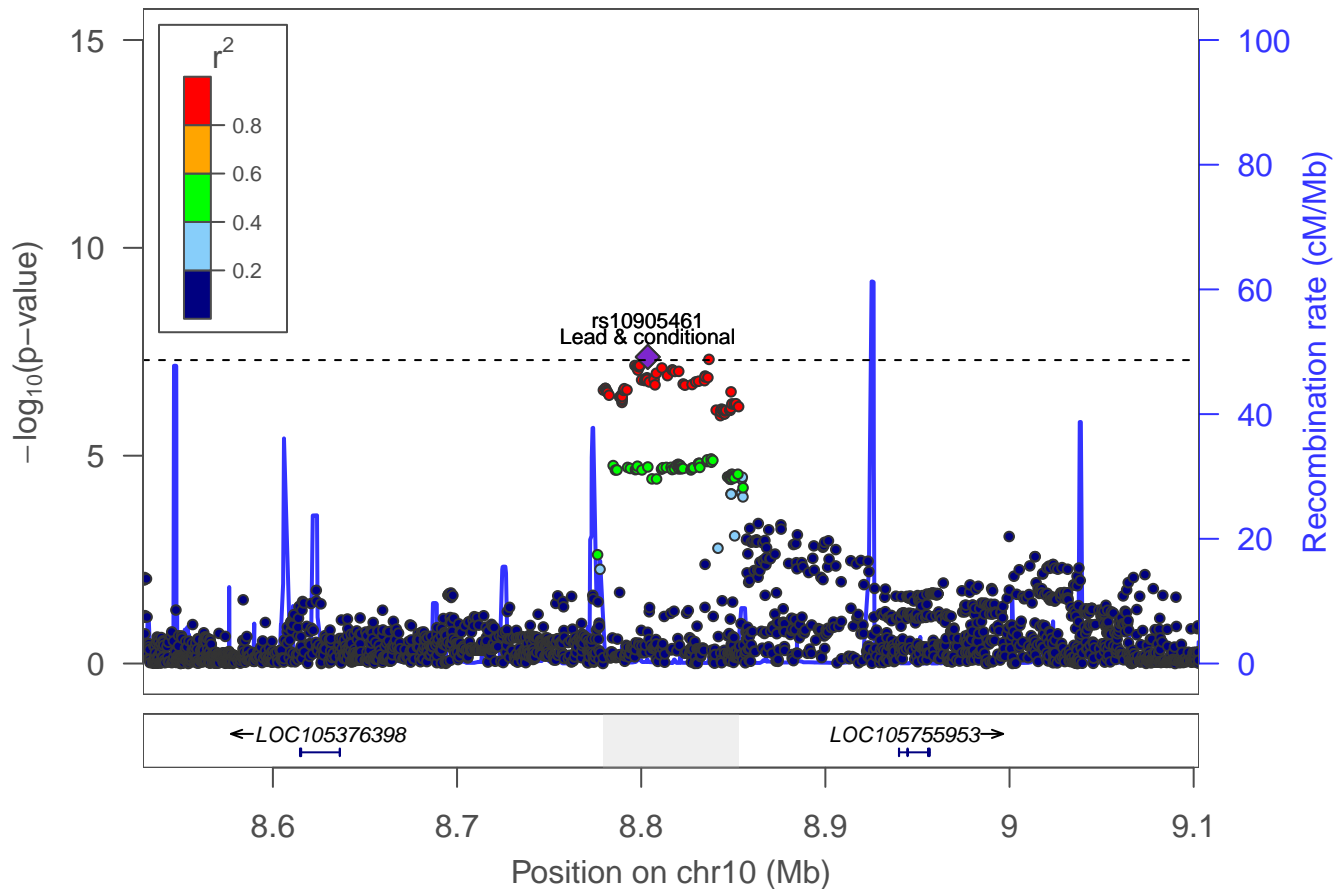

# General risk tolerance: locus 71 [chr 10:98.972–99.099Mb]

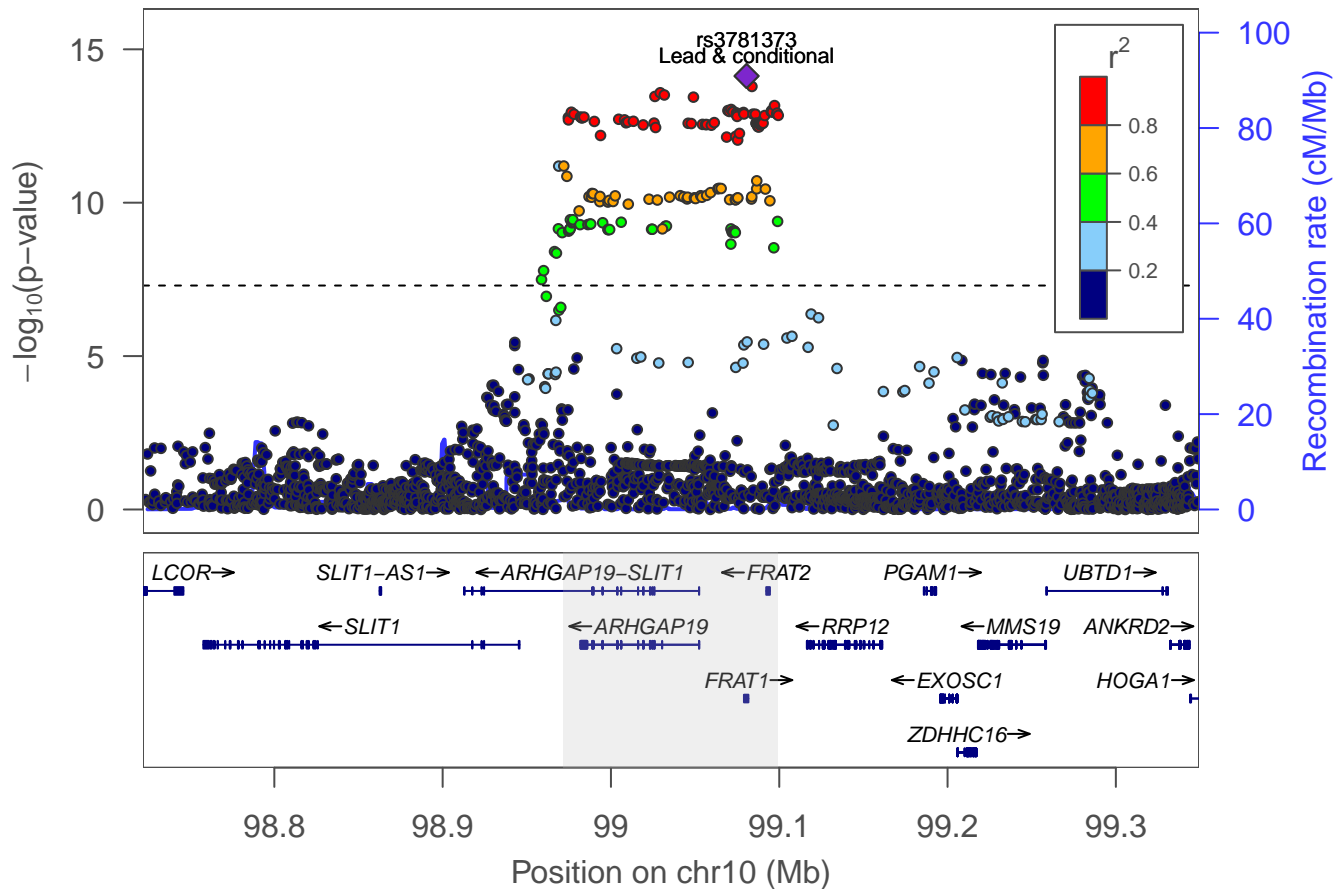

# General risk tolerance: locus 72 [chr 10:117.492–117.635Mb]

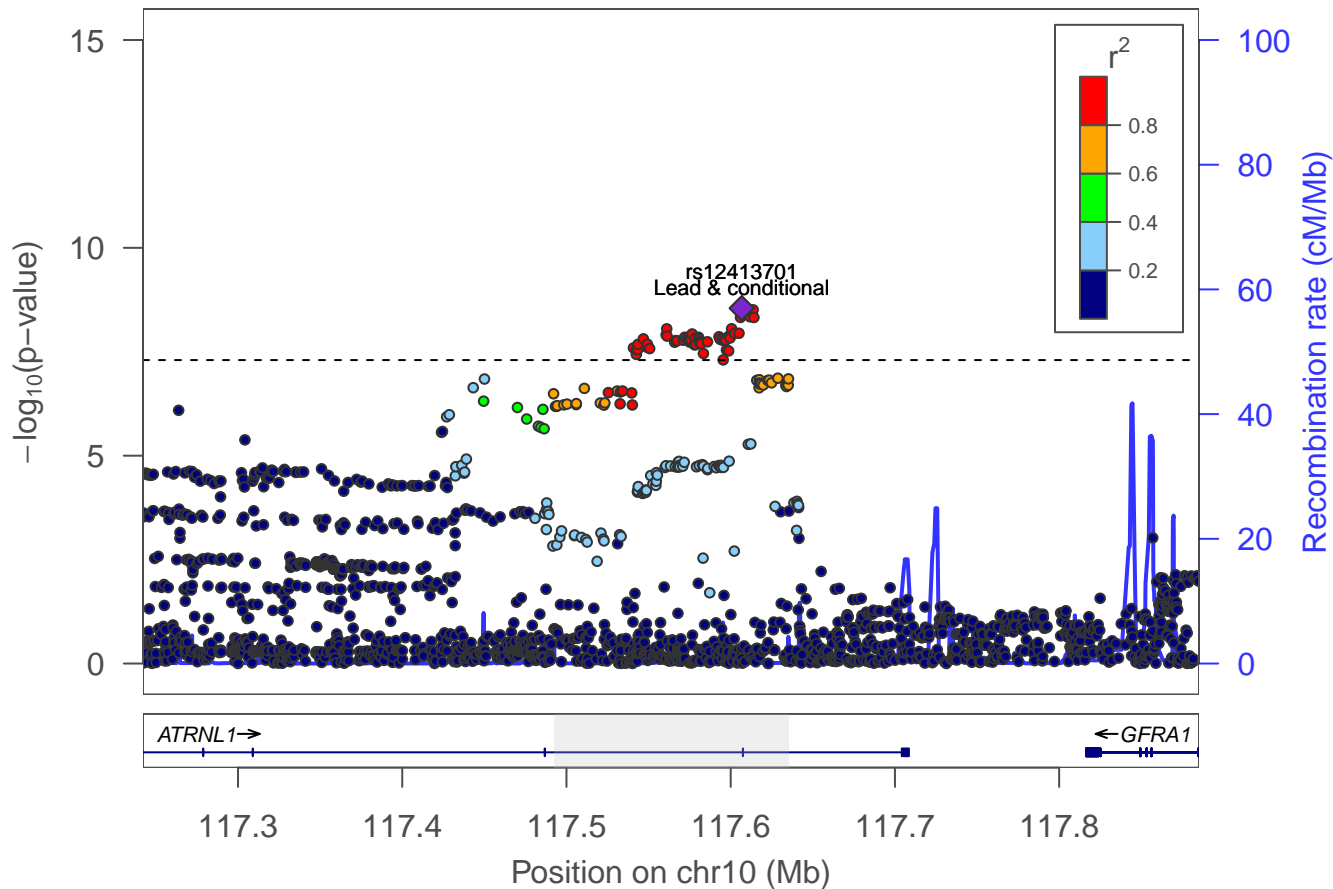

# General risk tolerance: locus 73 [chr 10:134.099–134.115Mb]

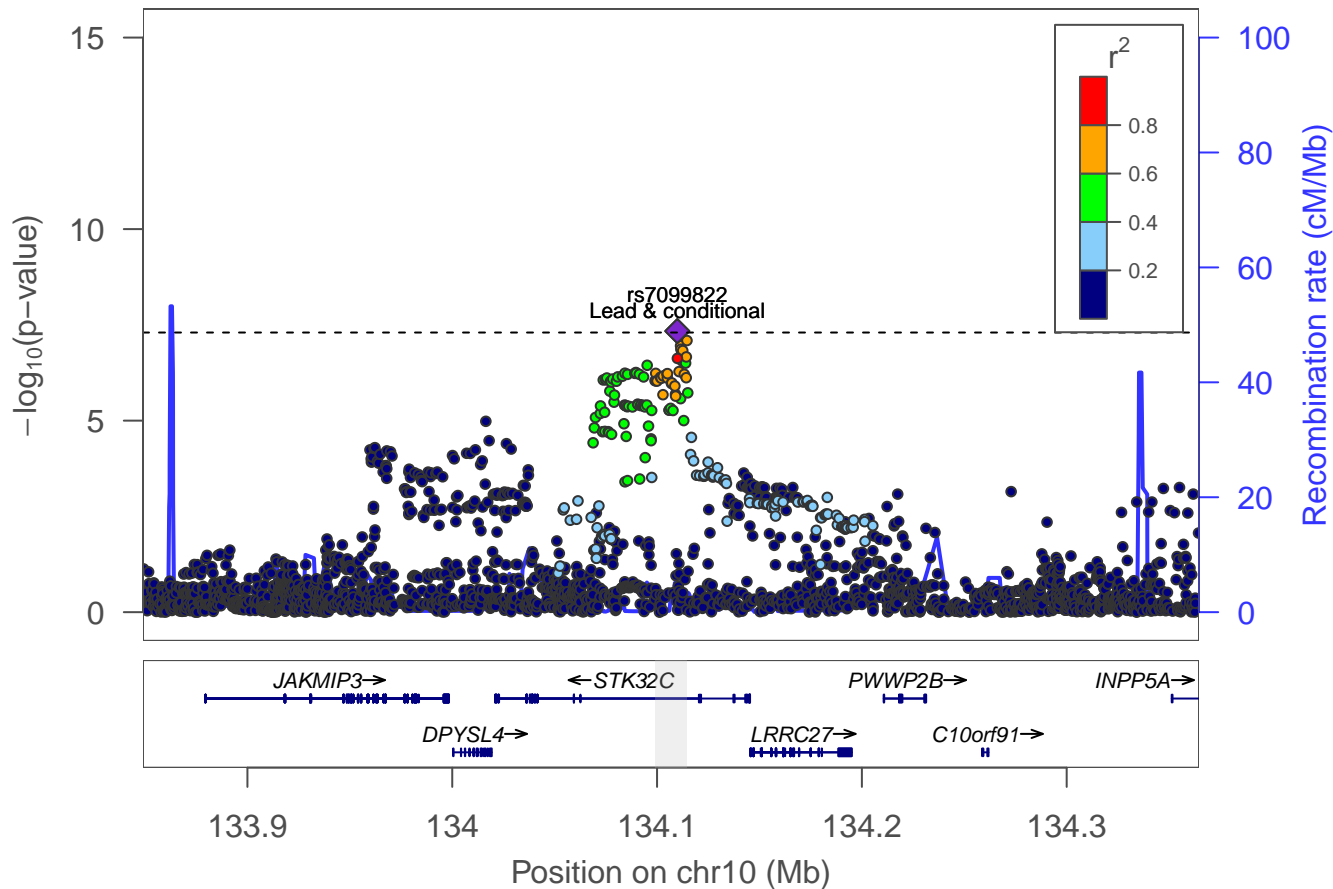

# General risk tolerance: locus 74 [chr 11:13.231–13.267Mb]

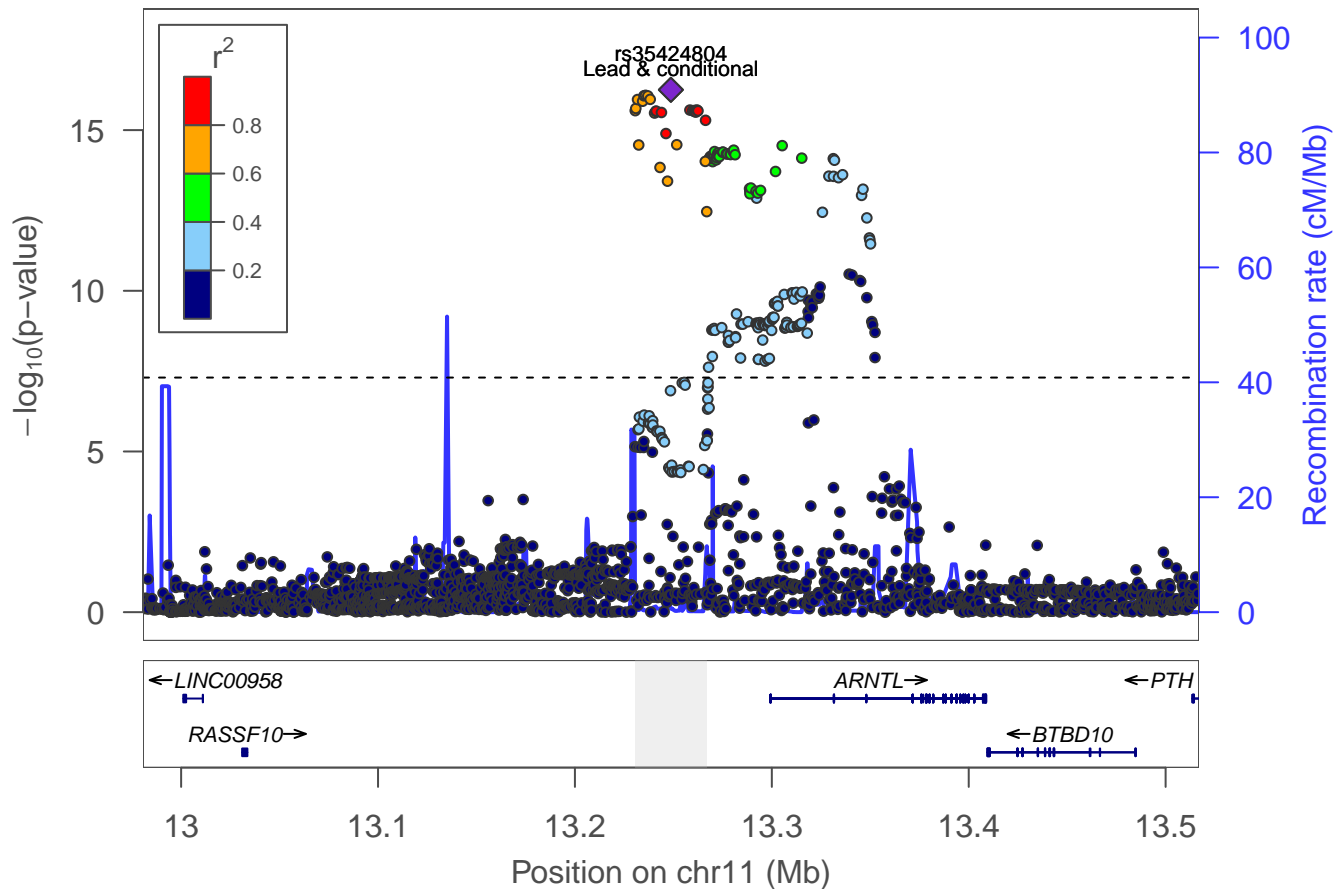

# General risk tolerance: locus 75 [chr 12:2.293–2.414Mb]

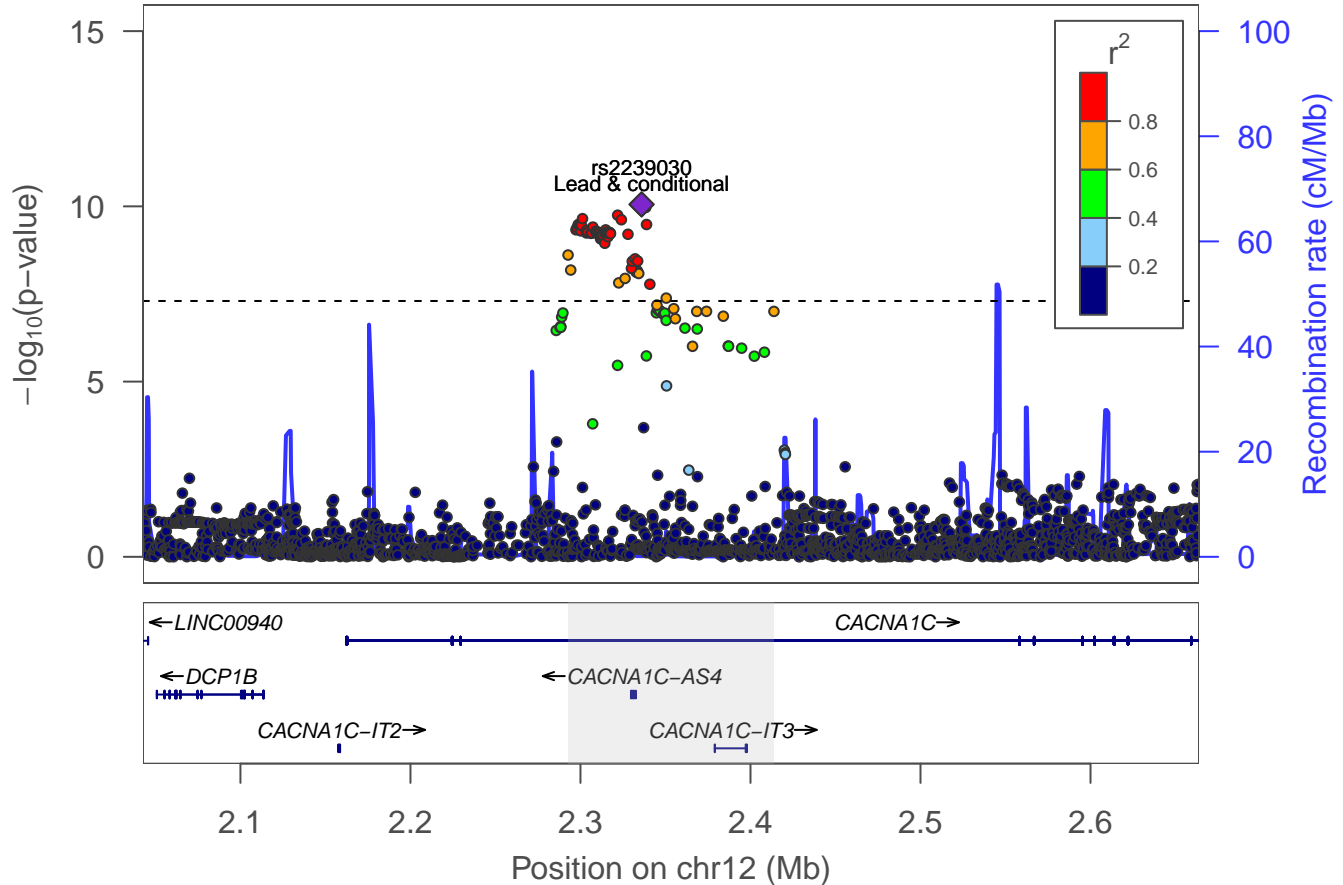

# General risk tolerance: locus 76 [chr 12:60.260–60.471Mb]

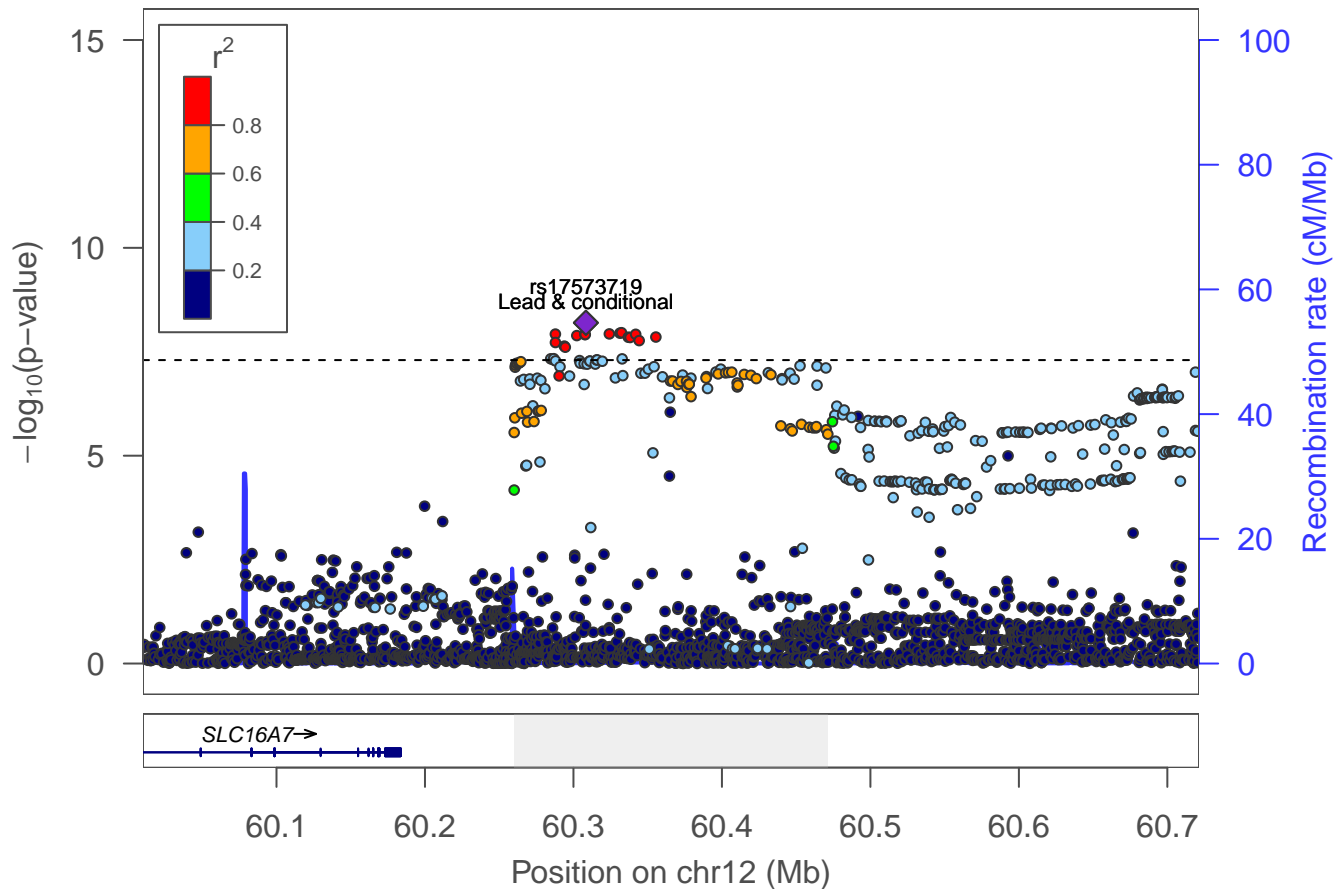

# General risk tolerance: locus 77 [chr 12:65.762–65.883Mb]

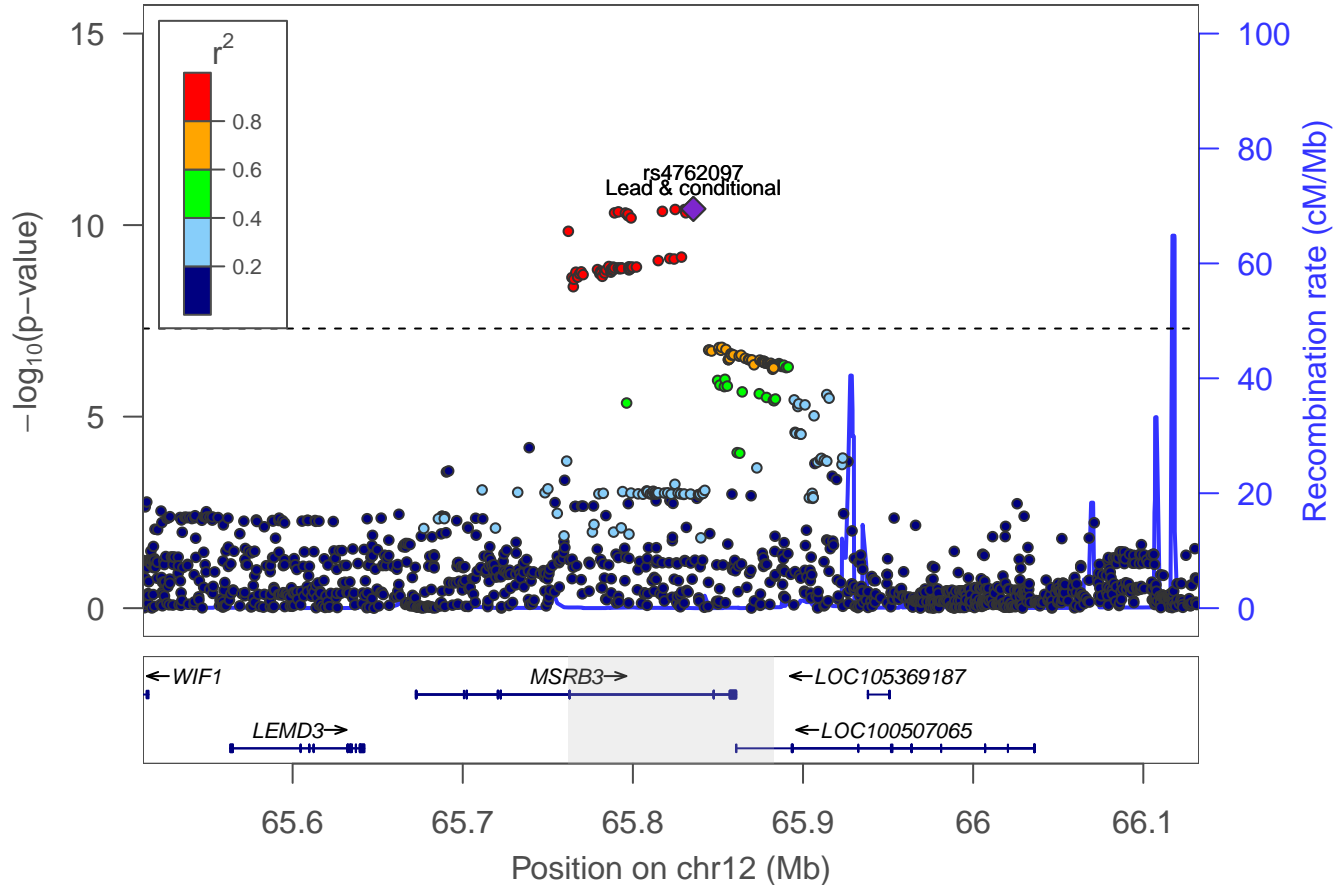



# General risk tolerance: locus 78 [chr 12:98.708–98.781Mb]

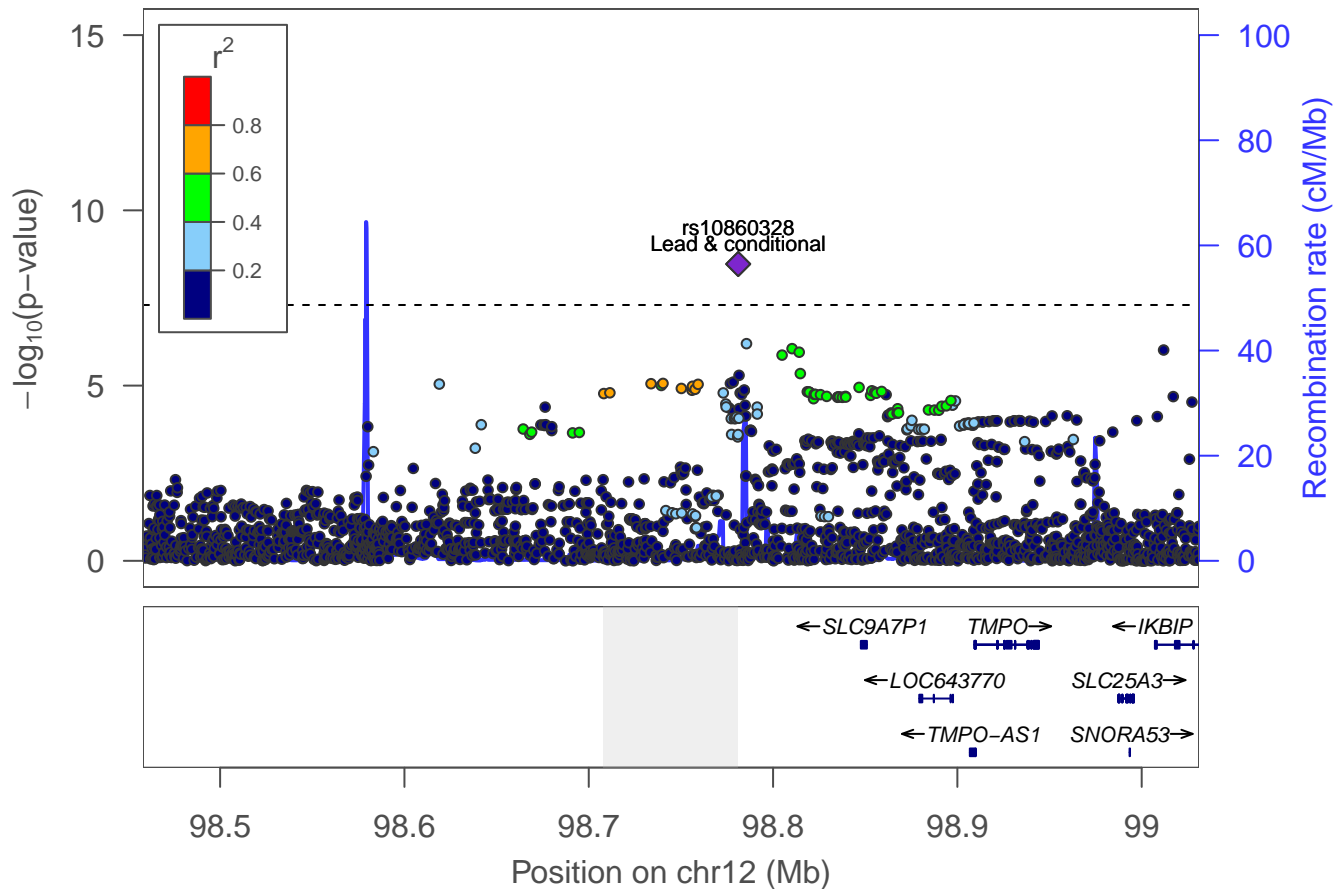

# General risk tolerance: locus 79 [chr 12:108.594–108.630Mb]

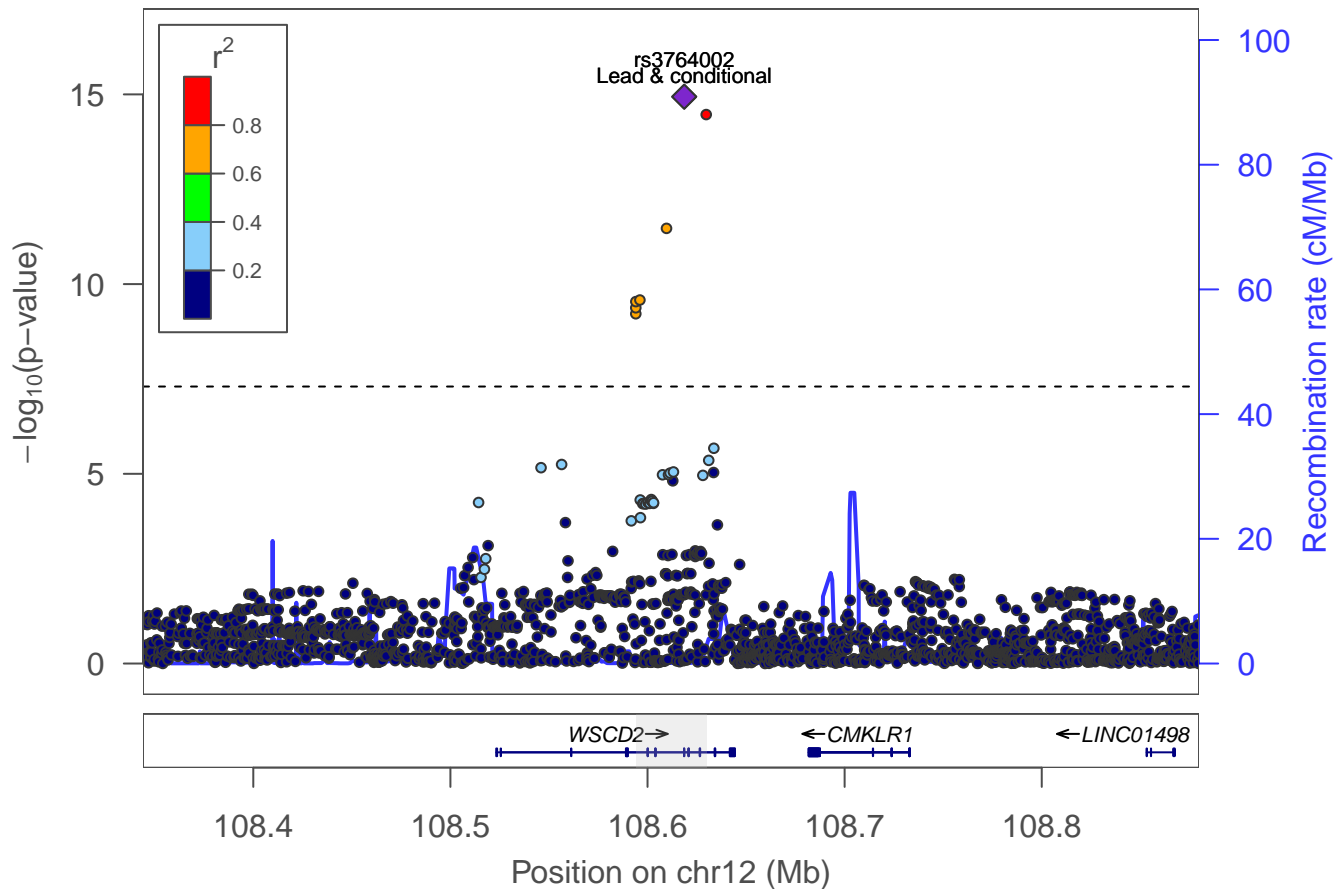

# General risk tolerance: locus 80 [chr 12:114.272–114.345Mb]

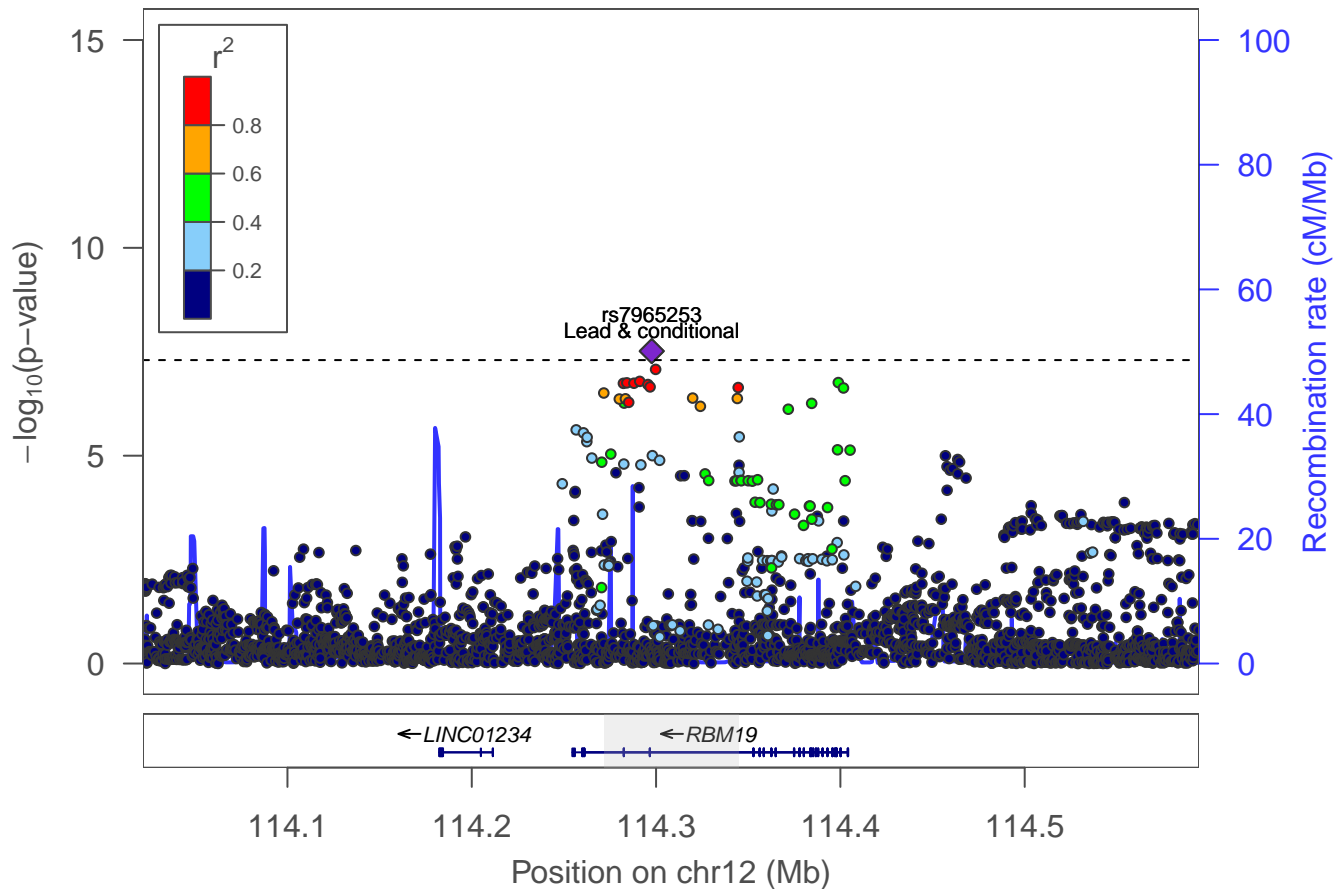

# General risk tolerance: locus 81 [chr 13:59.315–59.552Mb]

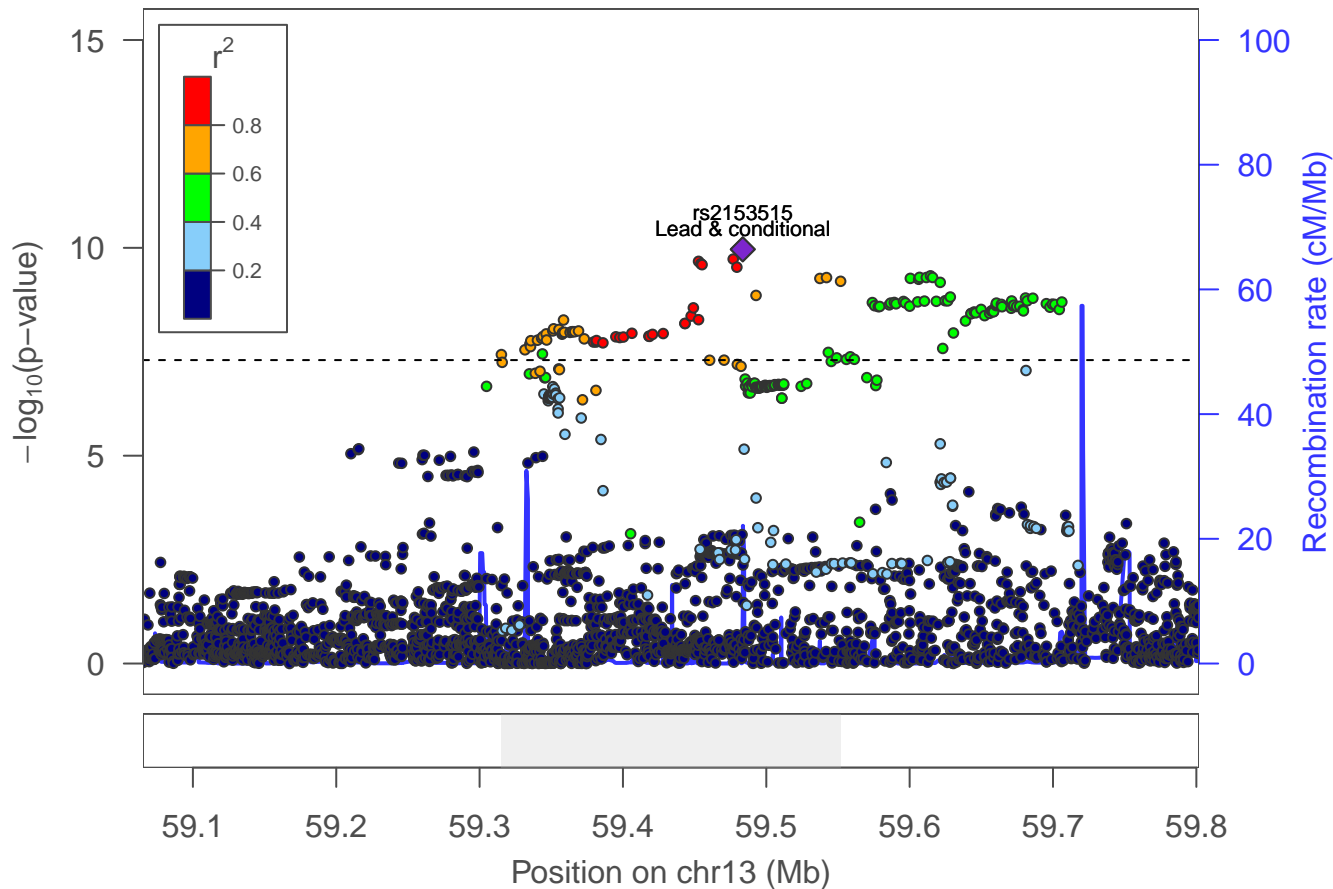

# General risk tolerance: locus 82 [chr 14:66.772–67.858Mb]

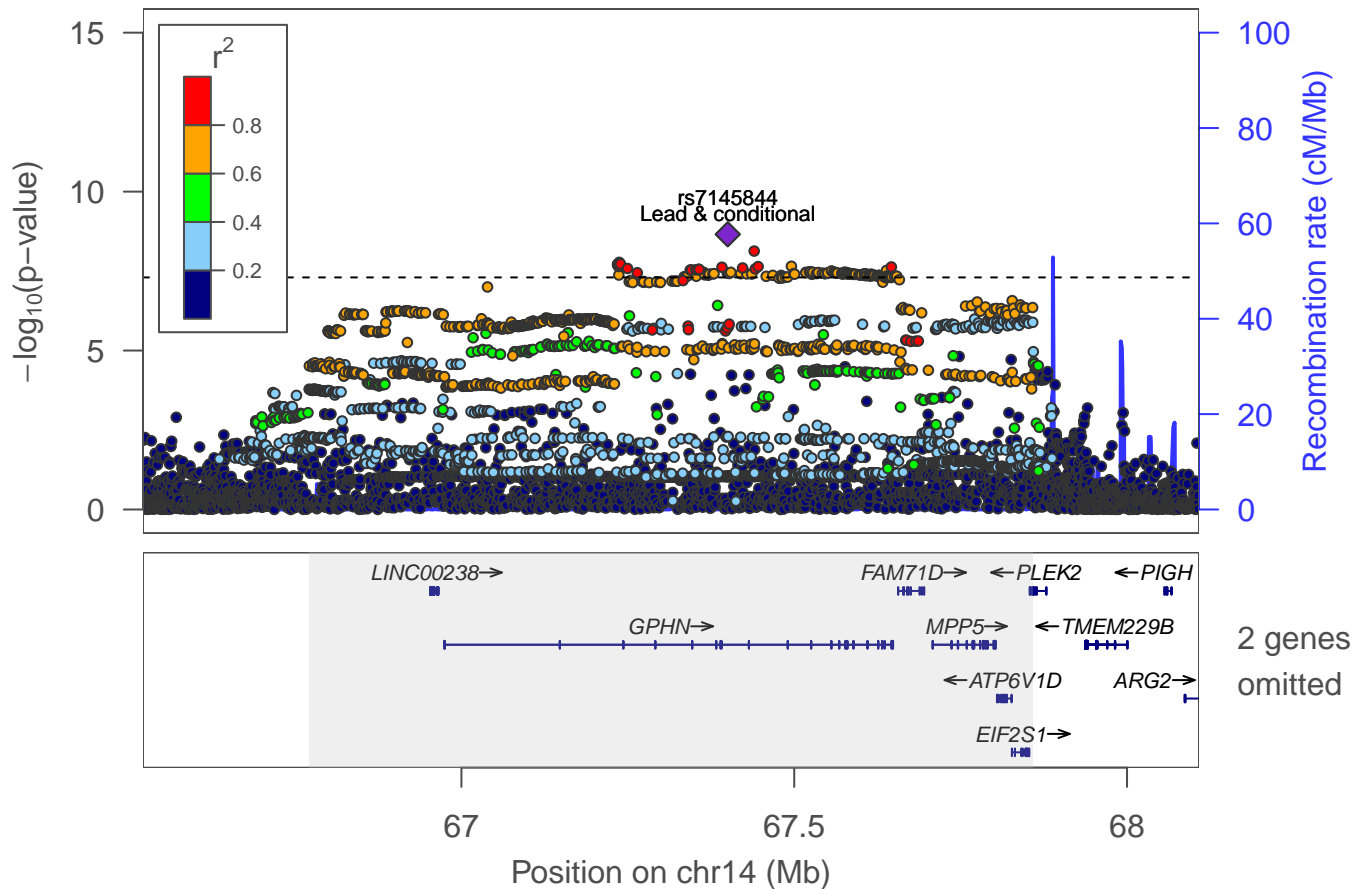

# General risk tolerance: locus 83 [chr 14:89.838–89.885Mb]

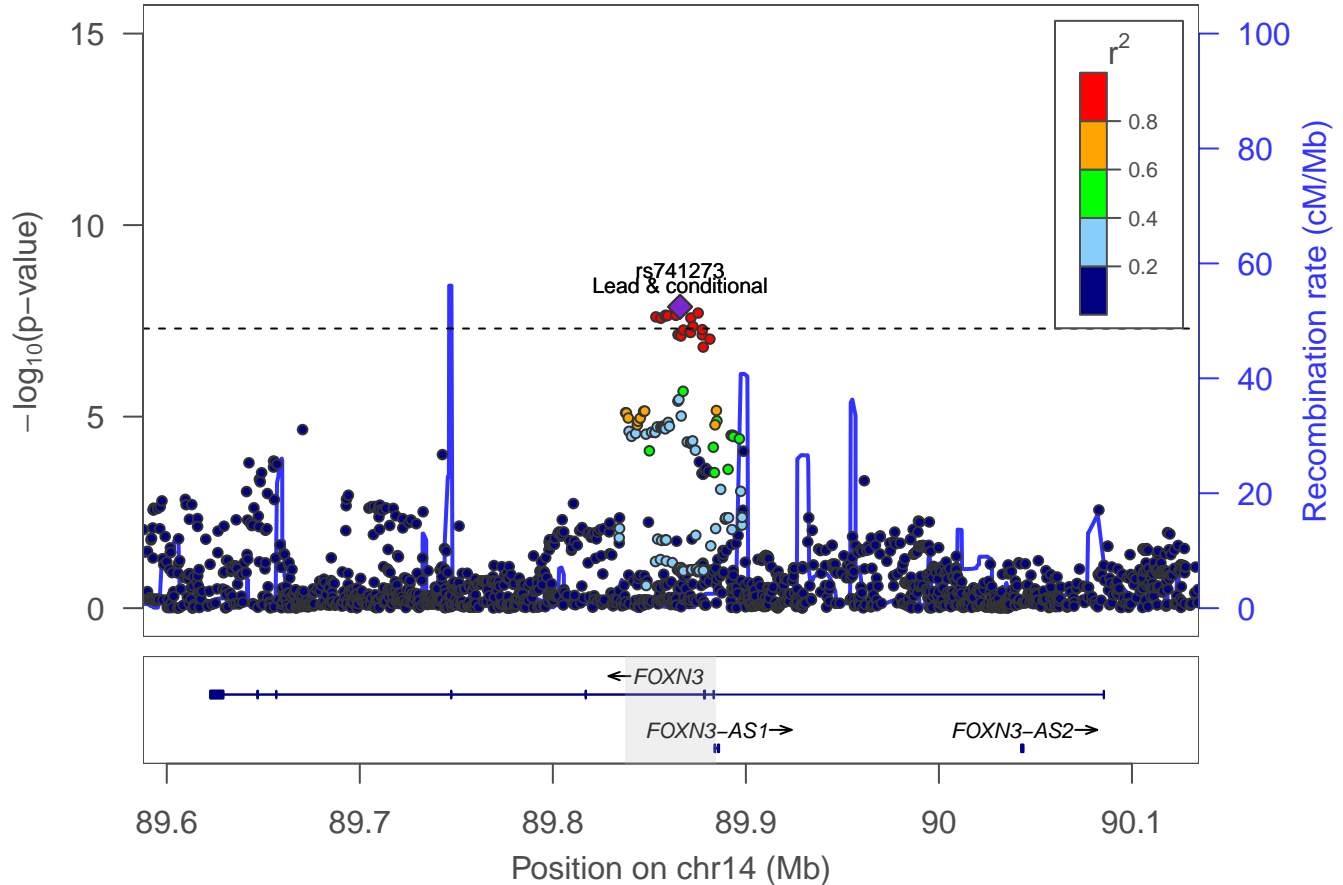

# General risk tolerance: locus 84 [chr 14:104.028–104.333Mb]

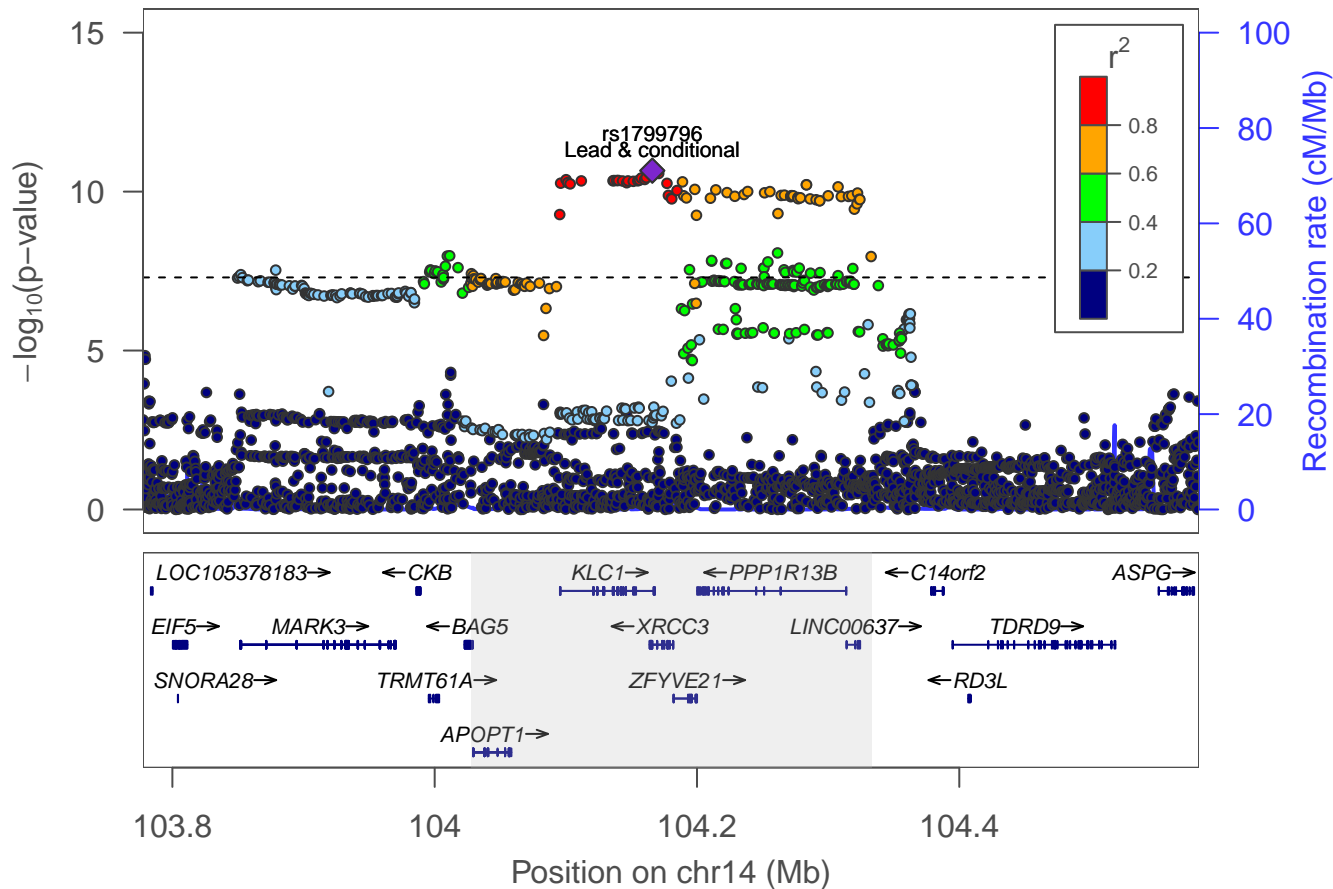

# General risk tolerance: locus 85 [chr 15:74.010–74.063Mb]

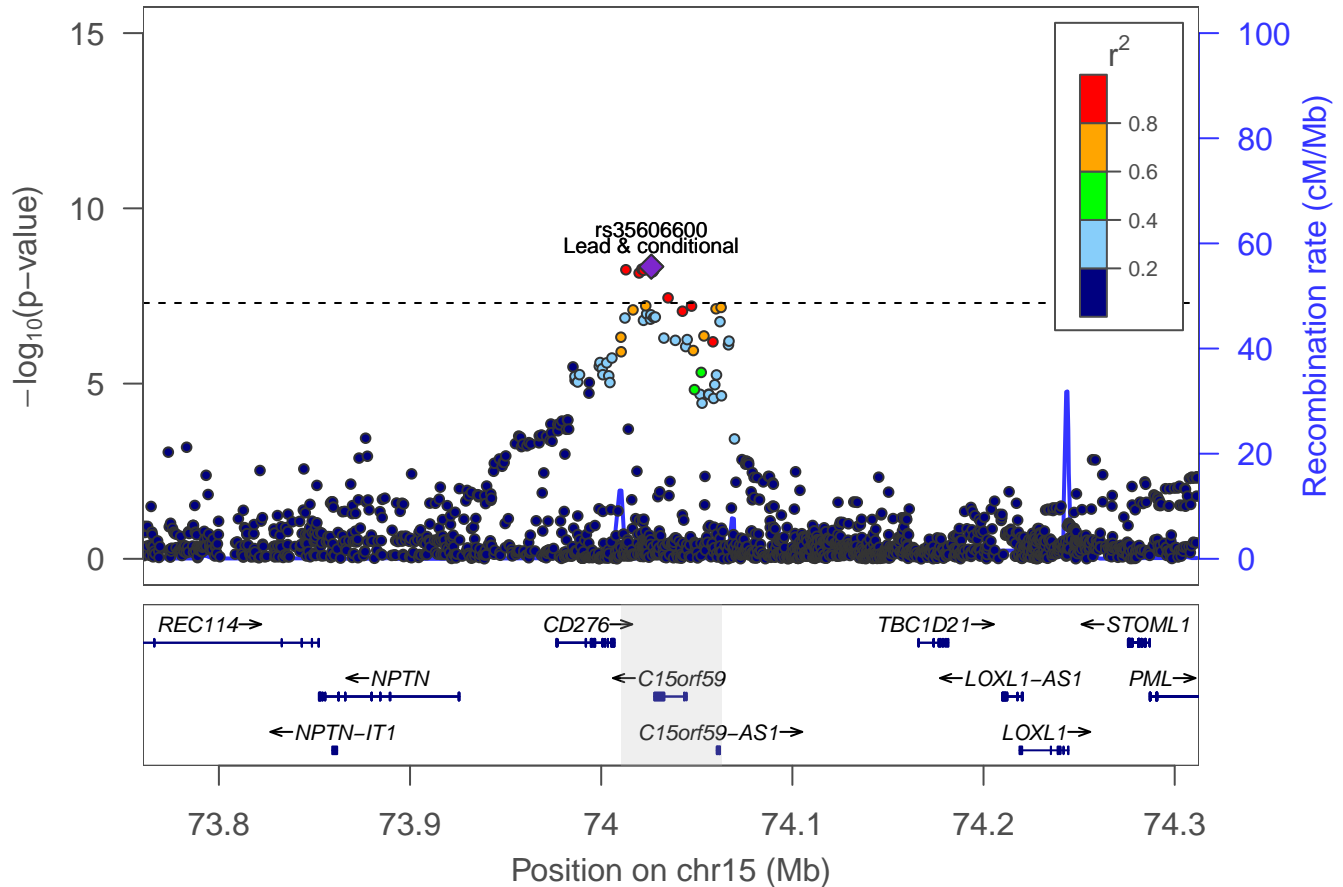



# General risk tolerance: locus 86 [chr 15:88.370–88.391Mb]

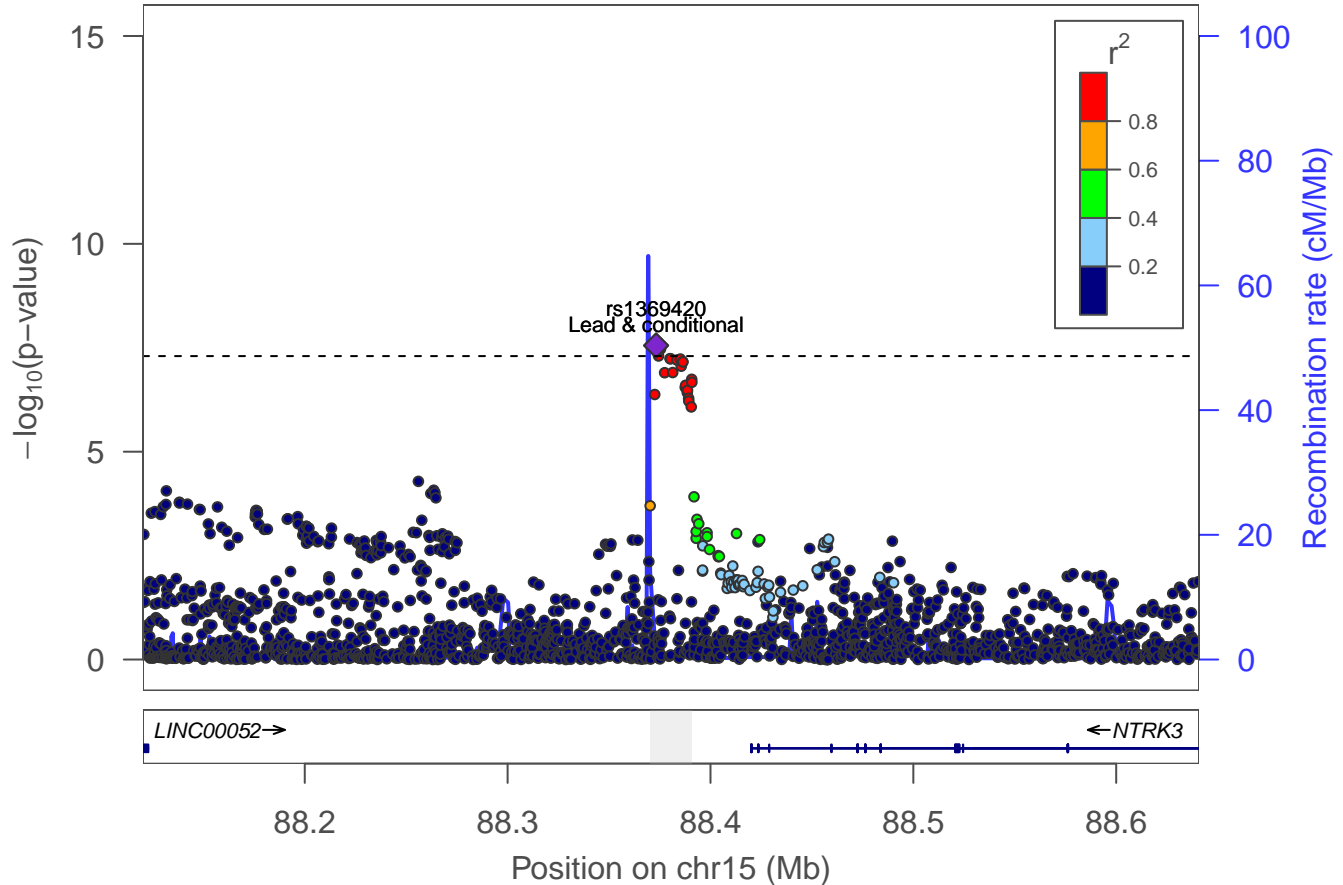

# General risk tolerance: locus 87 [chr 16:10.219–10.221Mb]

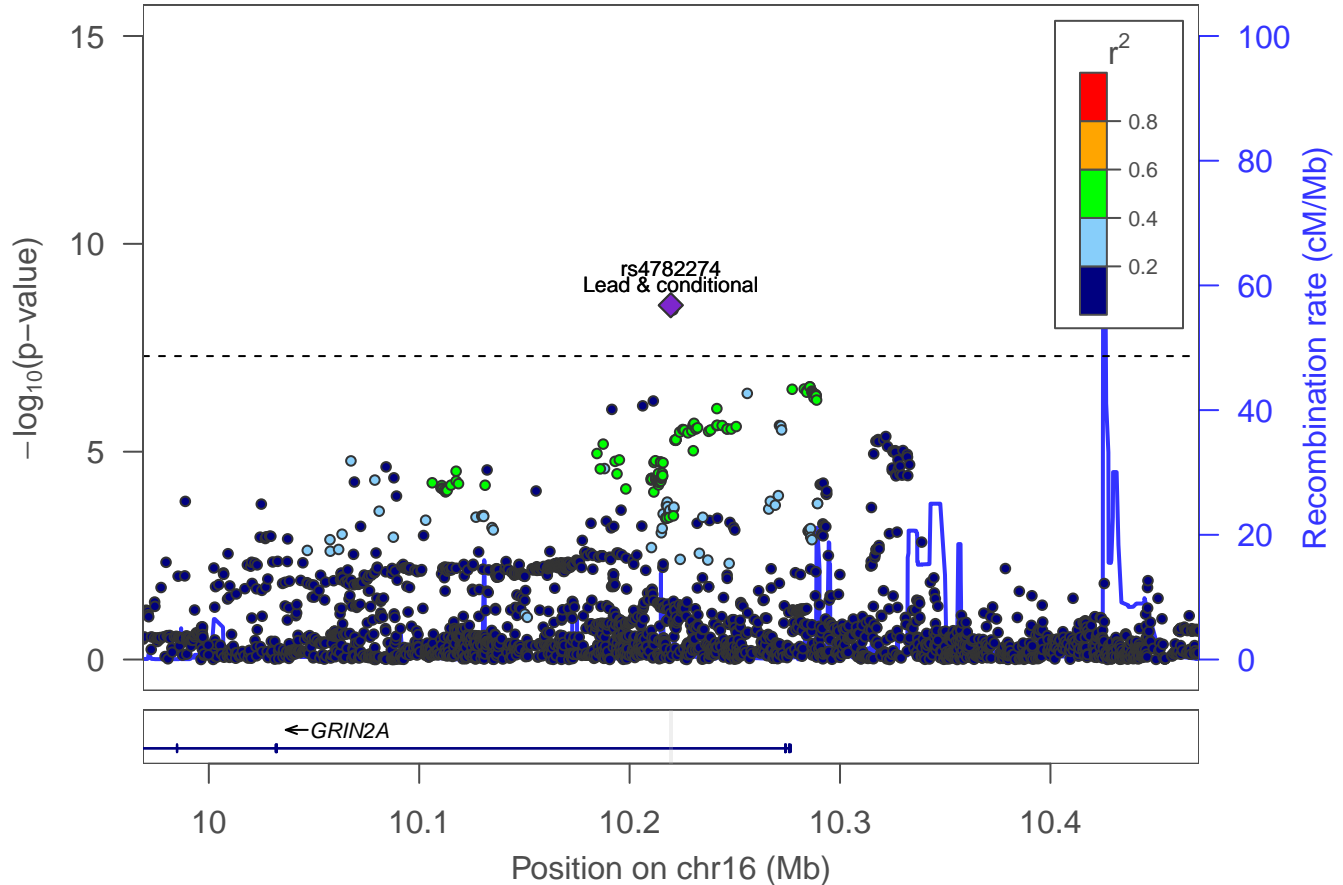

# General risk tolerance: locus 88 [chr 16:69.549–69.958Mb]

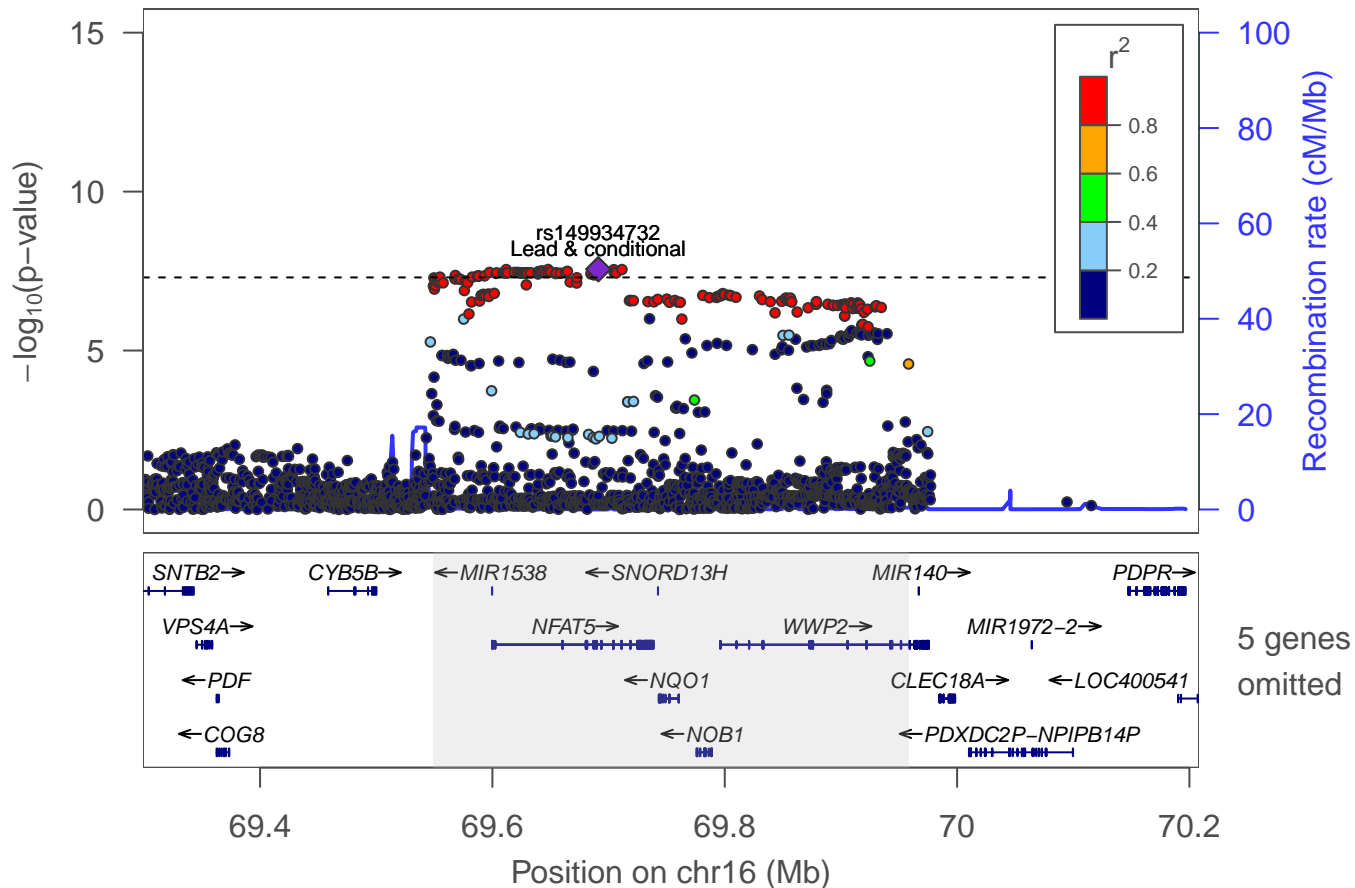

# General risk tolerance: Locus 89 [chr 16: 71.354–71.567Mb]

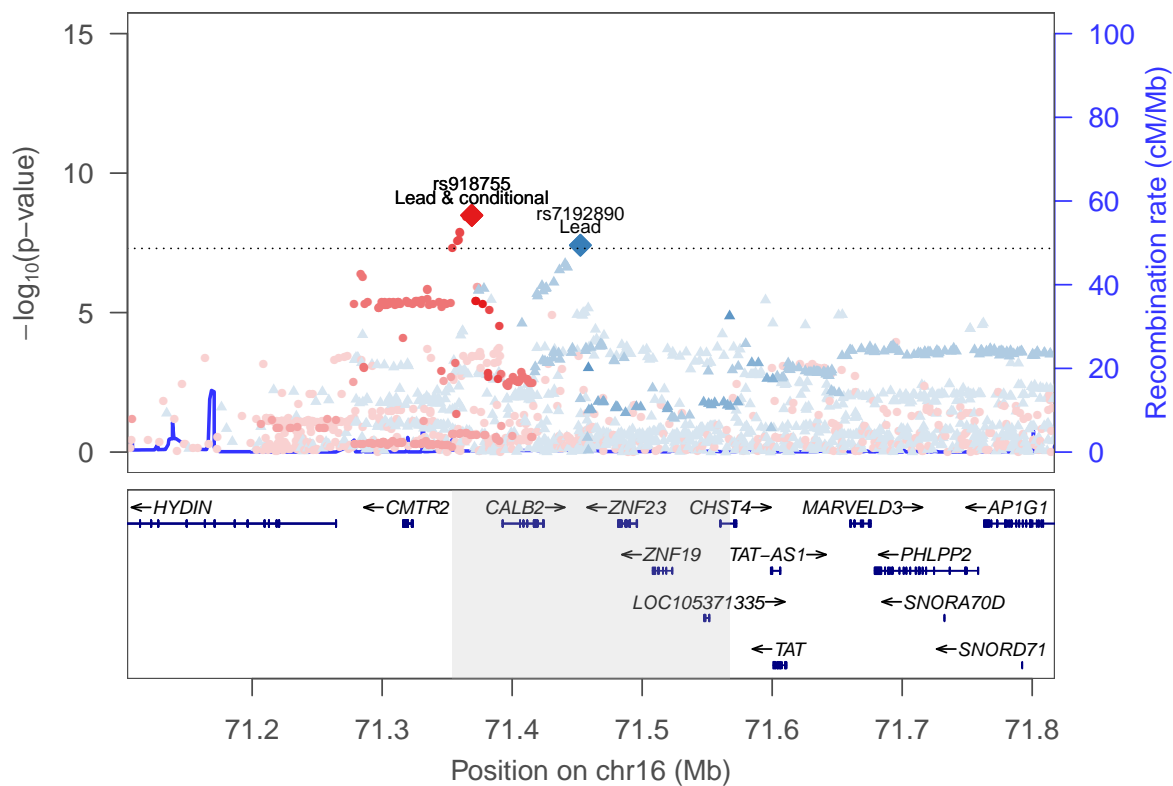

rs7192890 ▲  
rs918755 ●

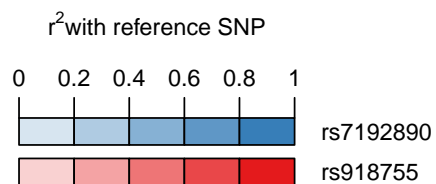

# General risk tolerance: locus 90 [chr 17:15.870–16.264Mb]

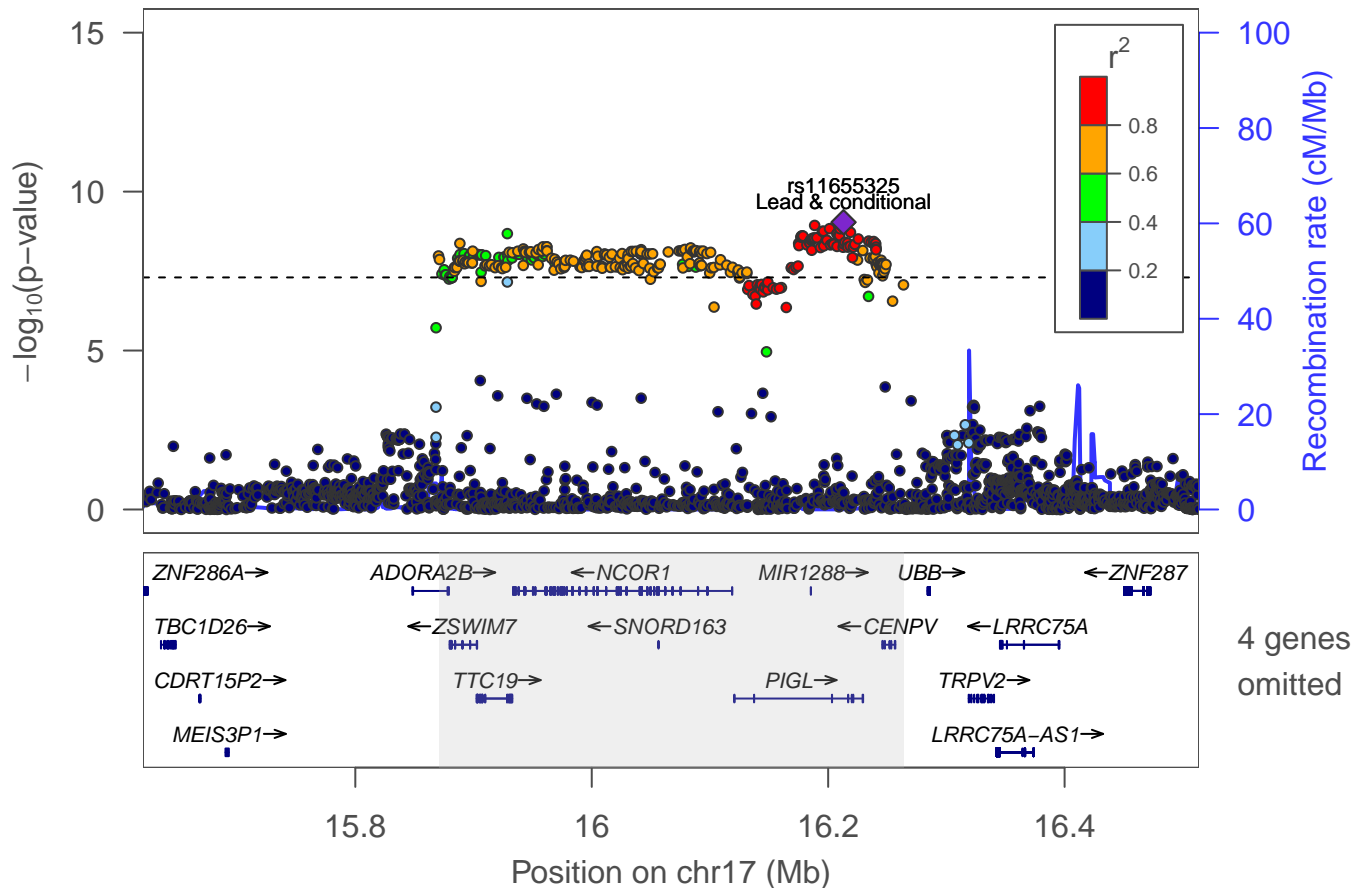

# General risk tolerance: locus 91 [chr 17:29.389–29.623Mb]

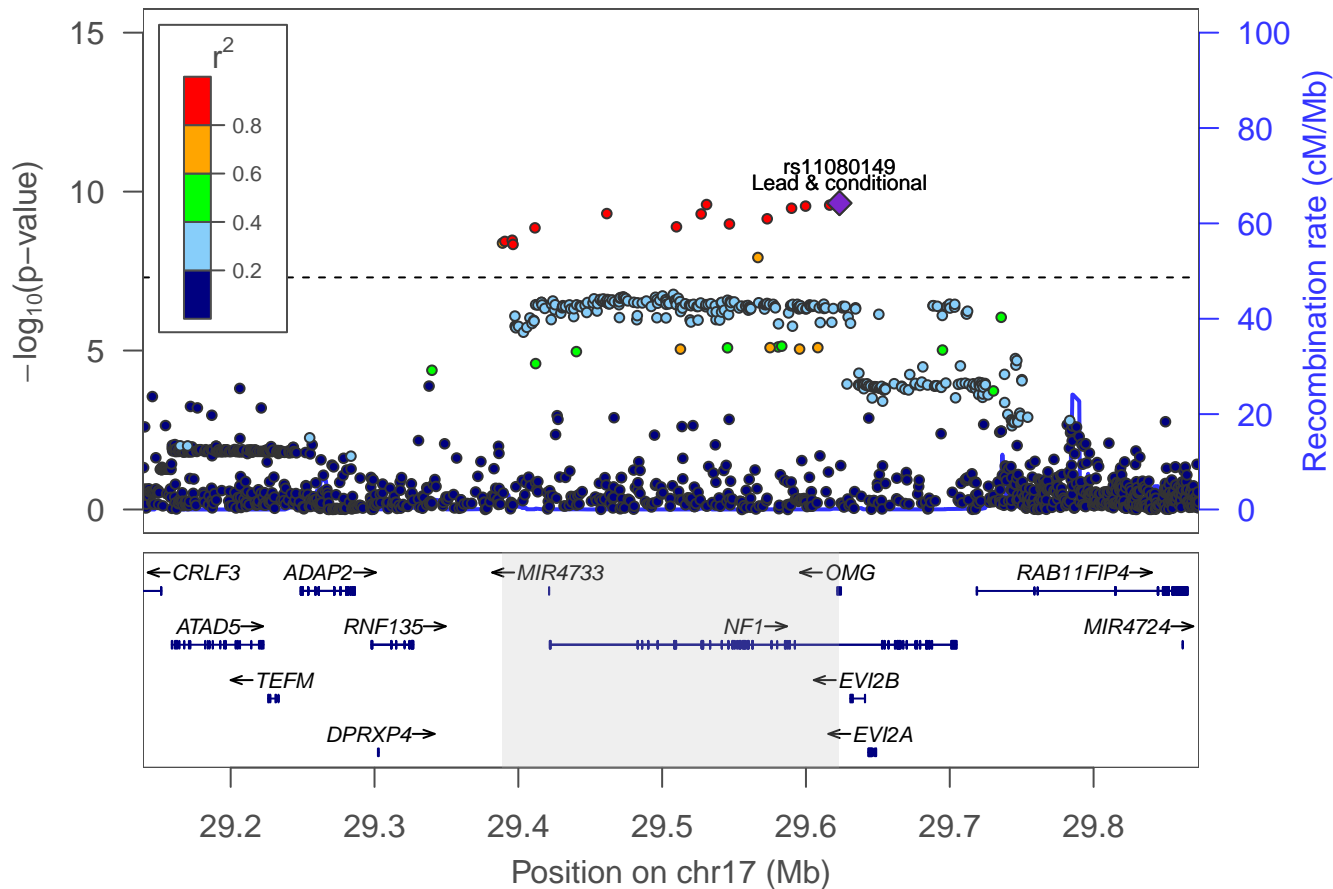

# General risk tolerance: locus 92 [chr 17:50.386–50.599Mb]

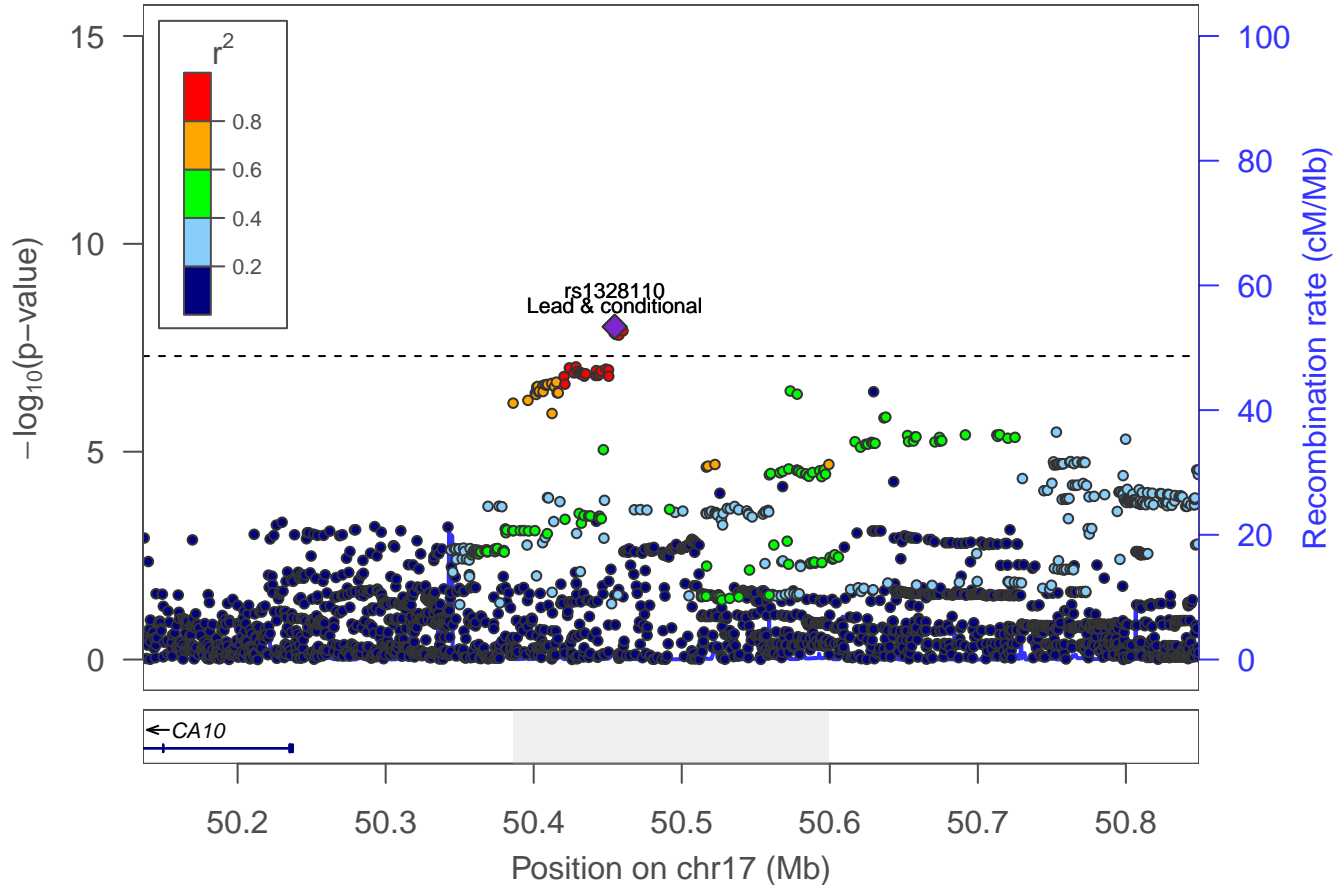

# General risk tolerance: locus 93 [chr 17:65.814–65.983Mb]

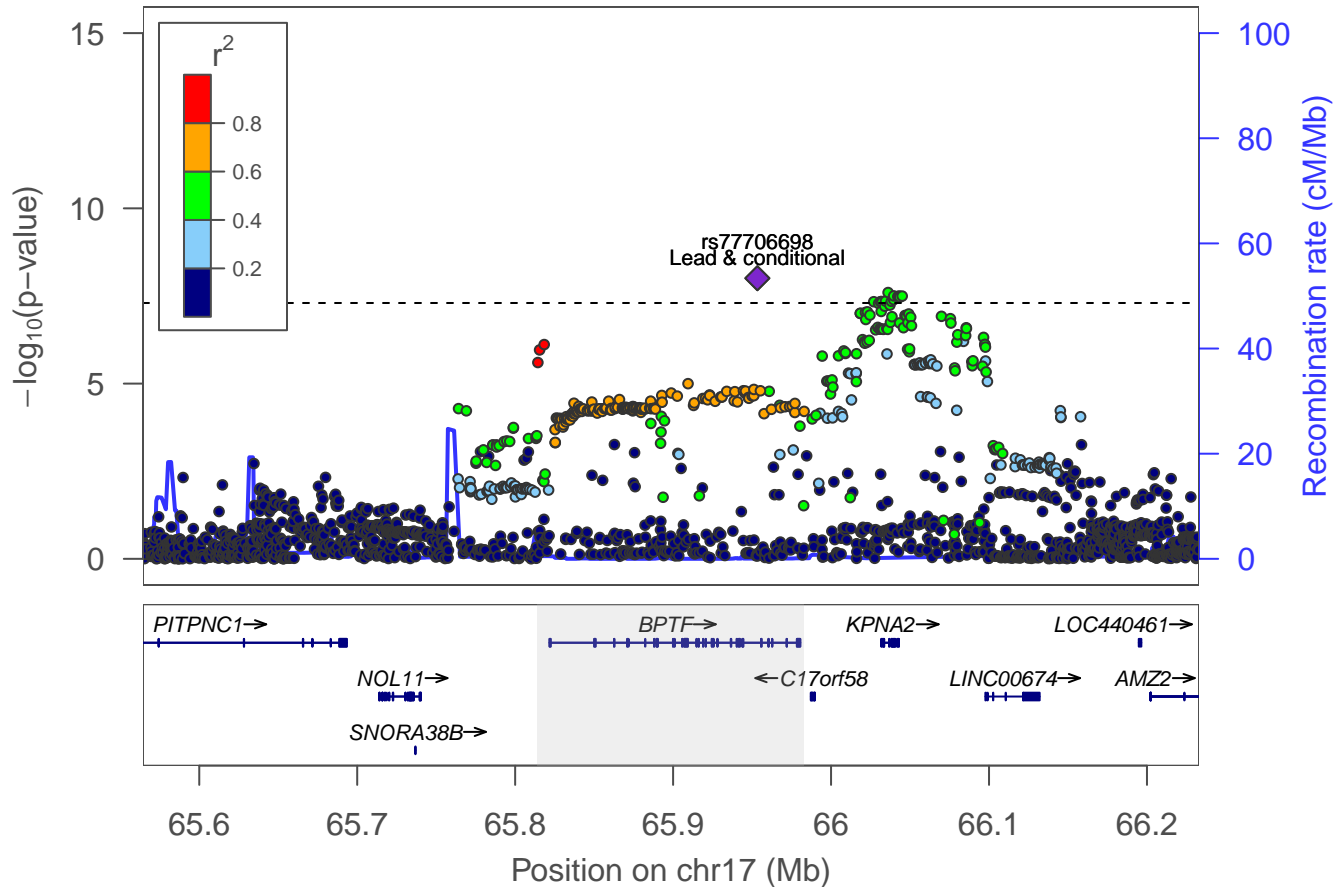



# General risk tolerance: locus 94 [chr 17:71.875–71.902Mb]

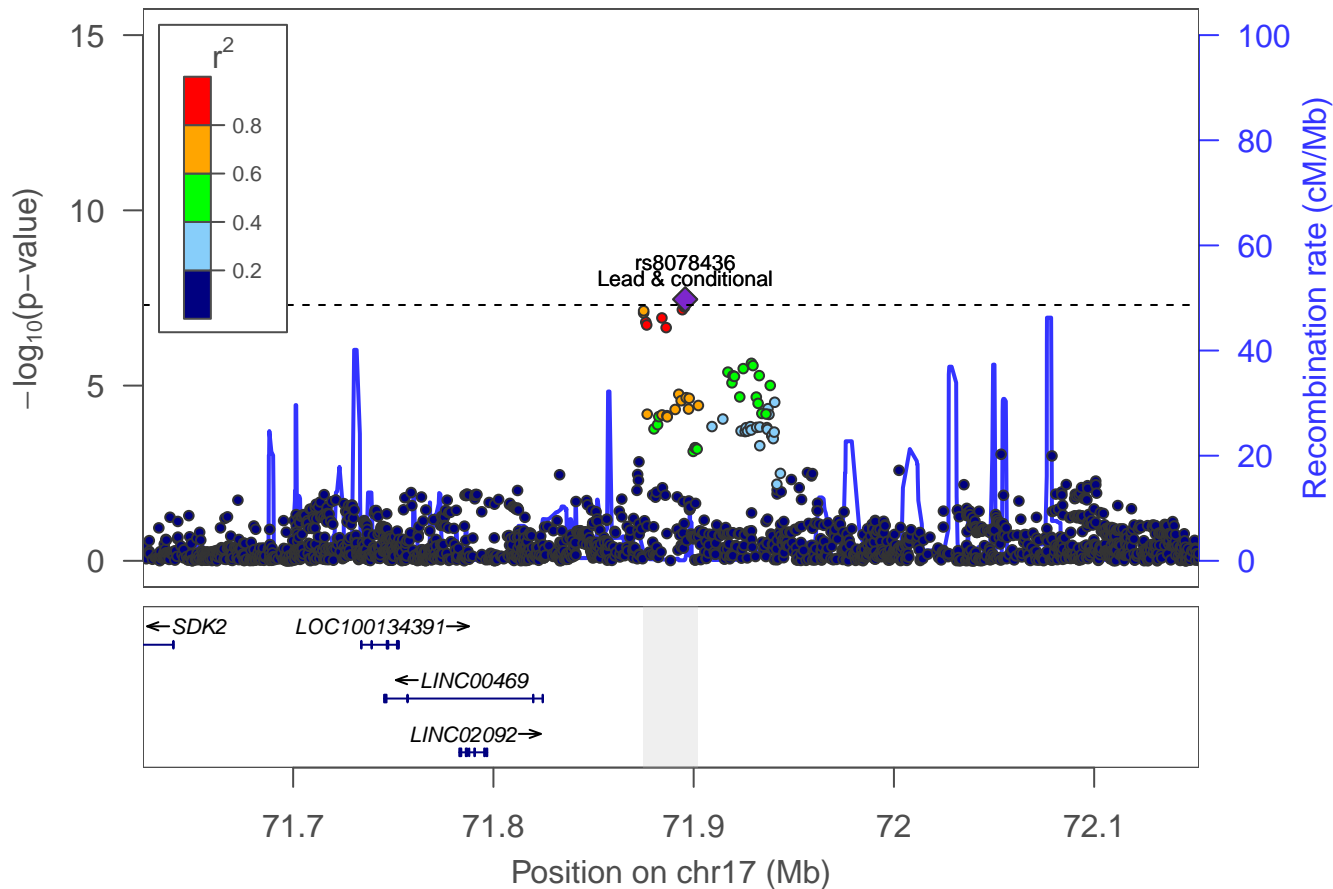

# General risk tolerance: locus 95 [chr 18:8.480–8.498Mb]

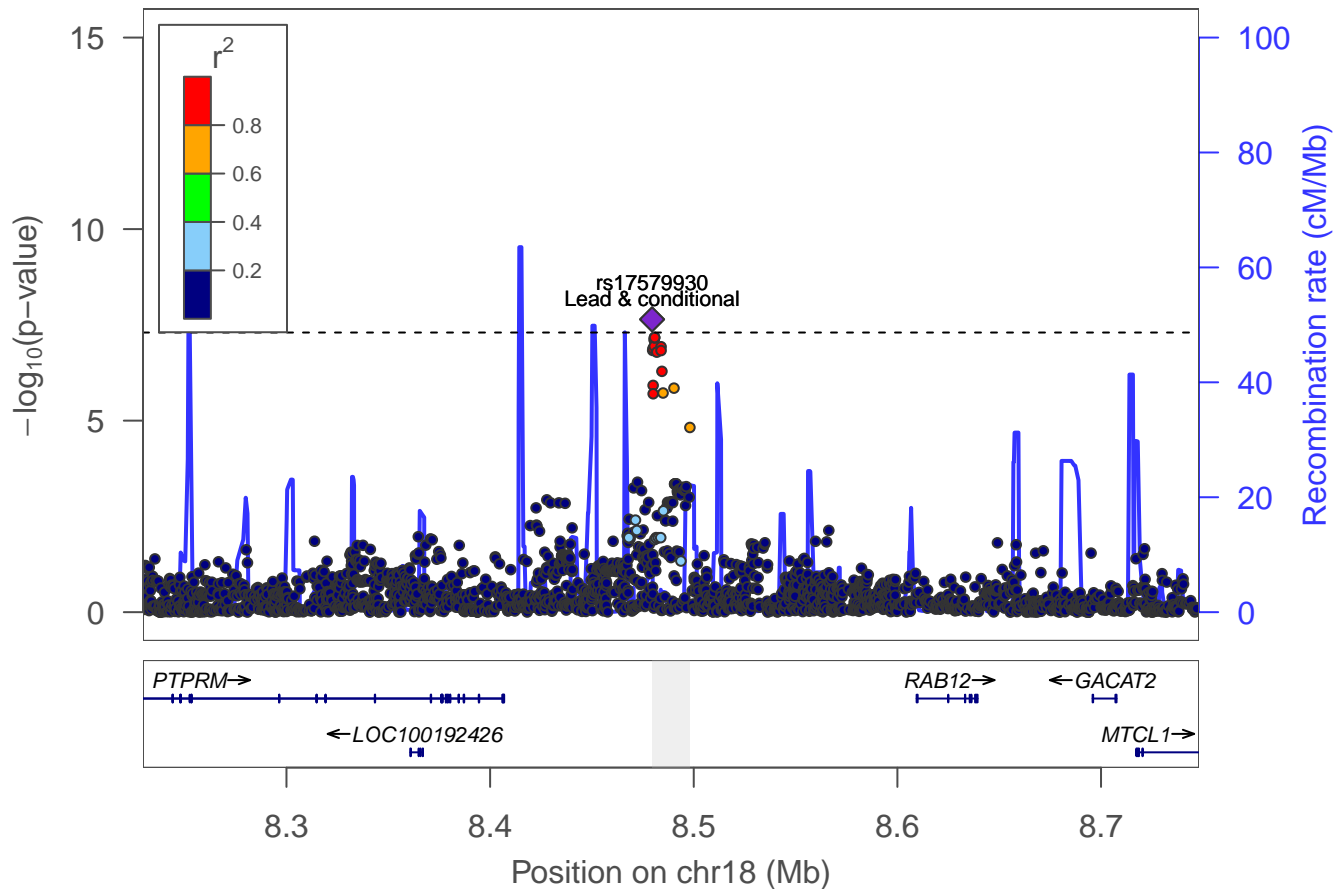

# General risk tolerance: locus 96 [chr 18:34.377–34.412Mb]

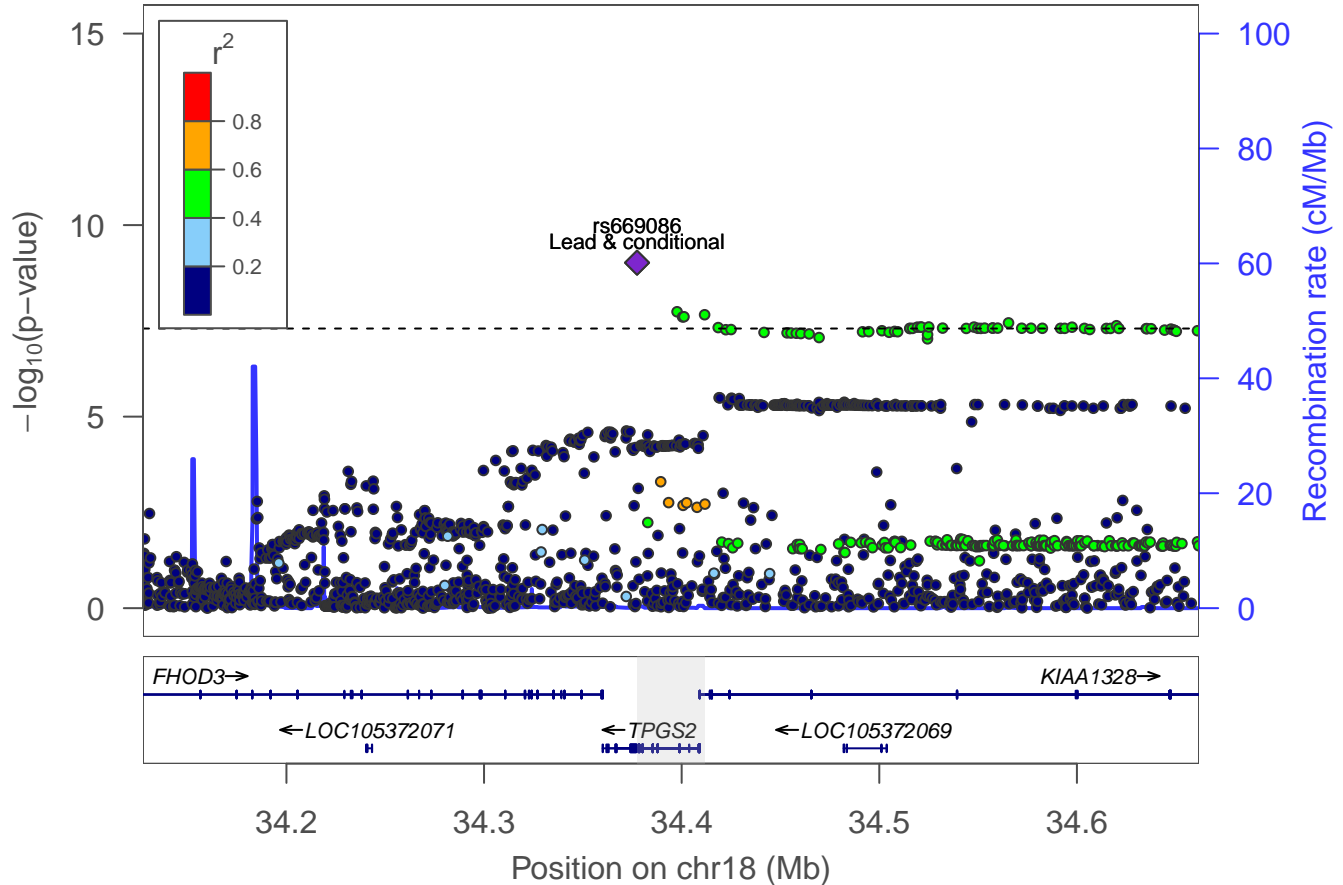

# General risk tolerance: locus 97 [chr 18:53.183–53.183Mb]

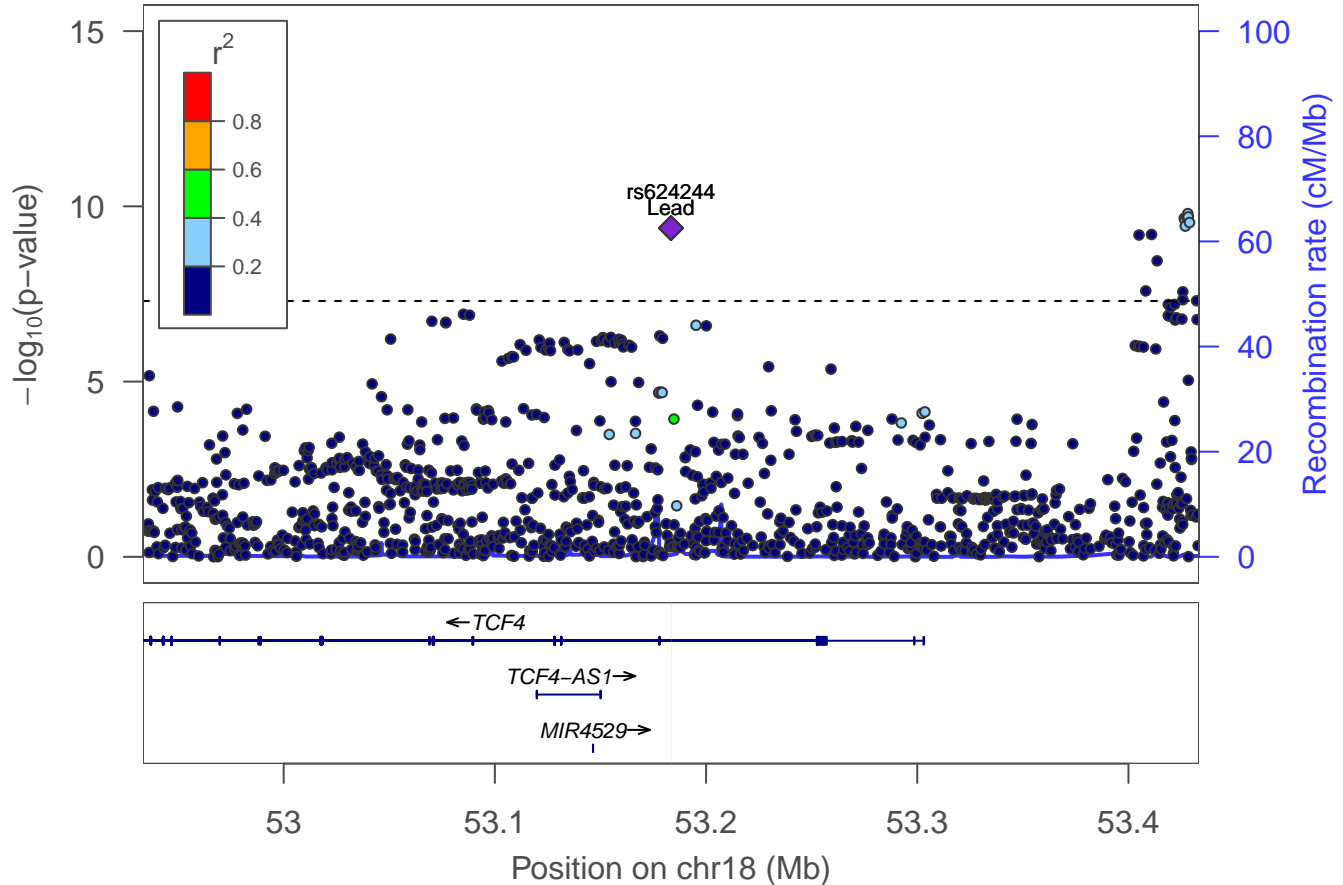

# General risk tolerance: Locus 98 [chr 18: 53.480–53.695Mb]

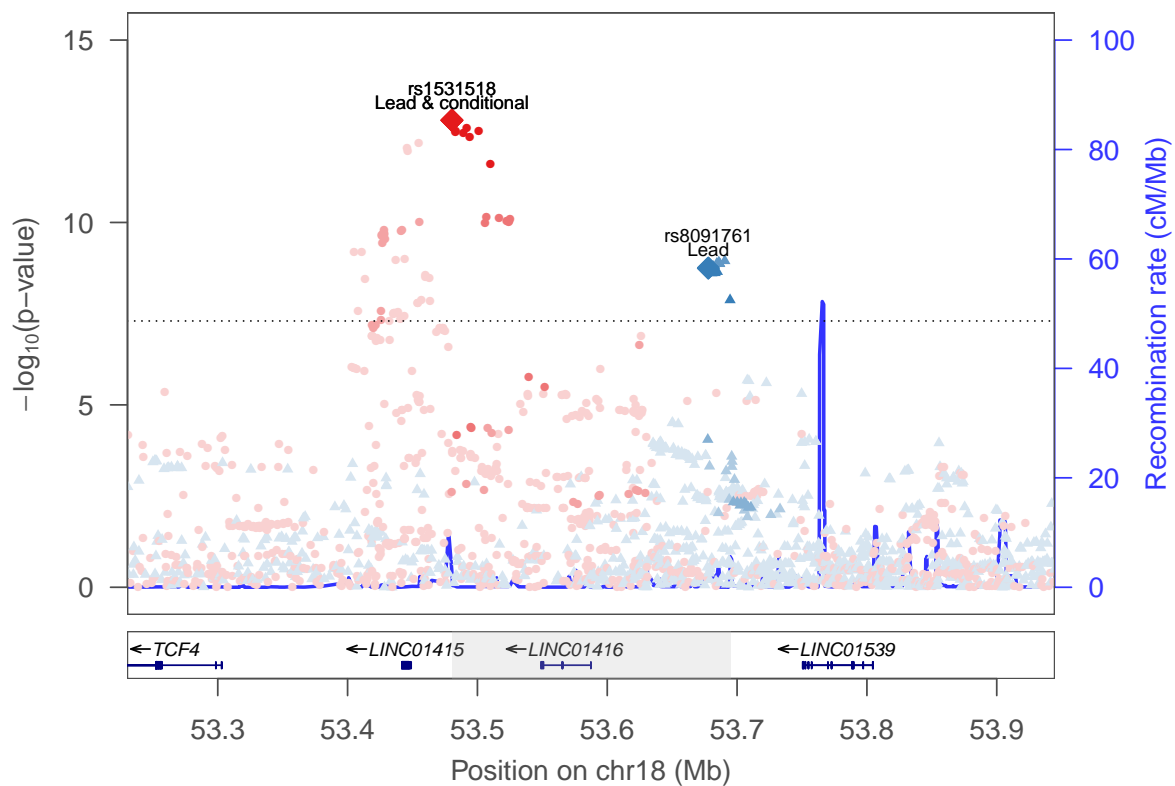

rs8091761 ▲  
rs1531518 ●

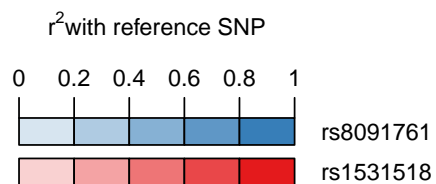

# General risk tolerance: locus 99 [chr 19:31.830–31.940Mb]

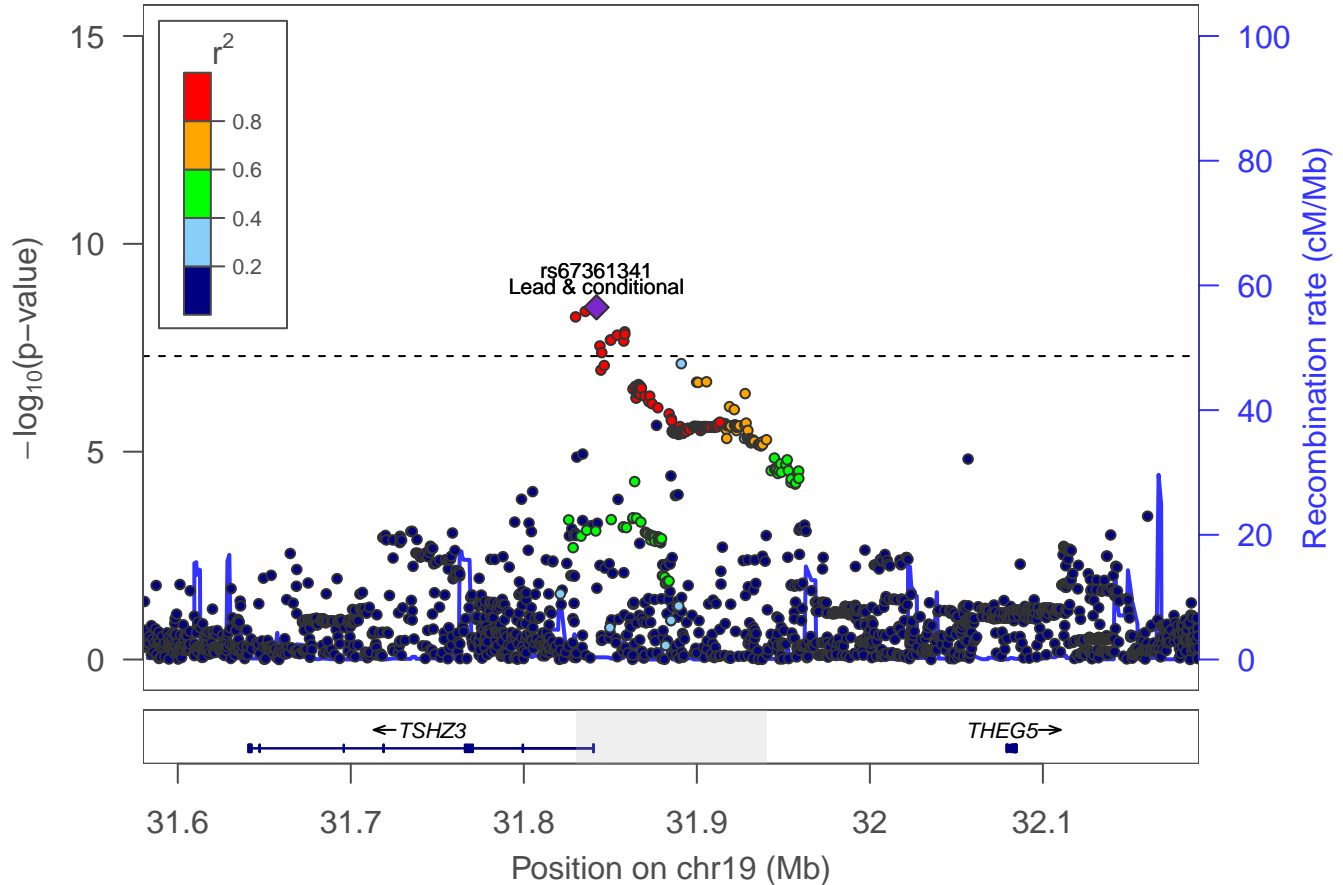

# LocusZoom plots for the 137 loci identified in the GWAS of adventurousness

---

# Adventurousness: locus 1 [chr 1:21.035–21.535Mb]

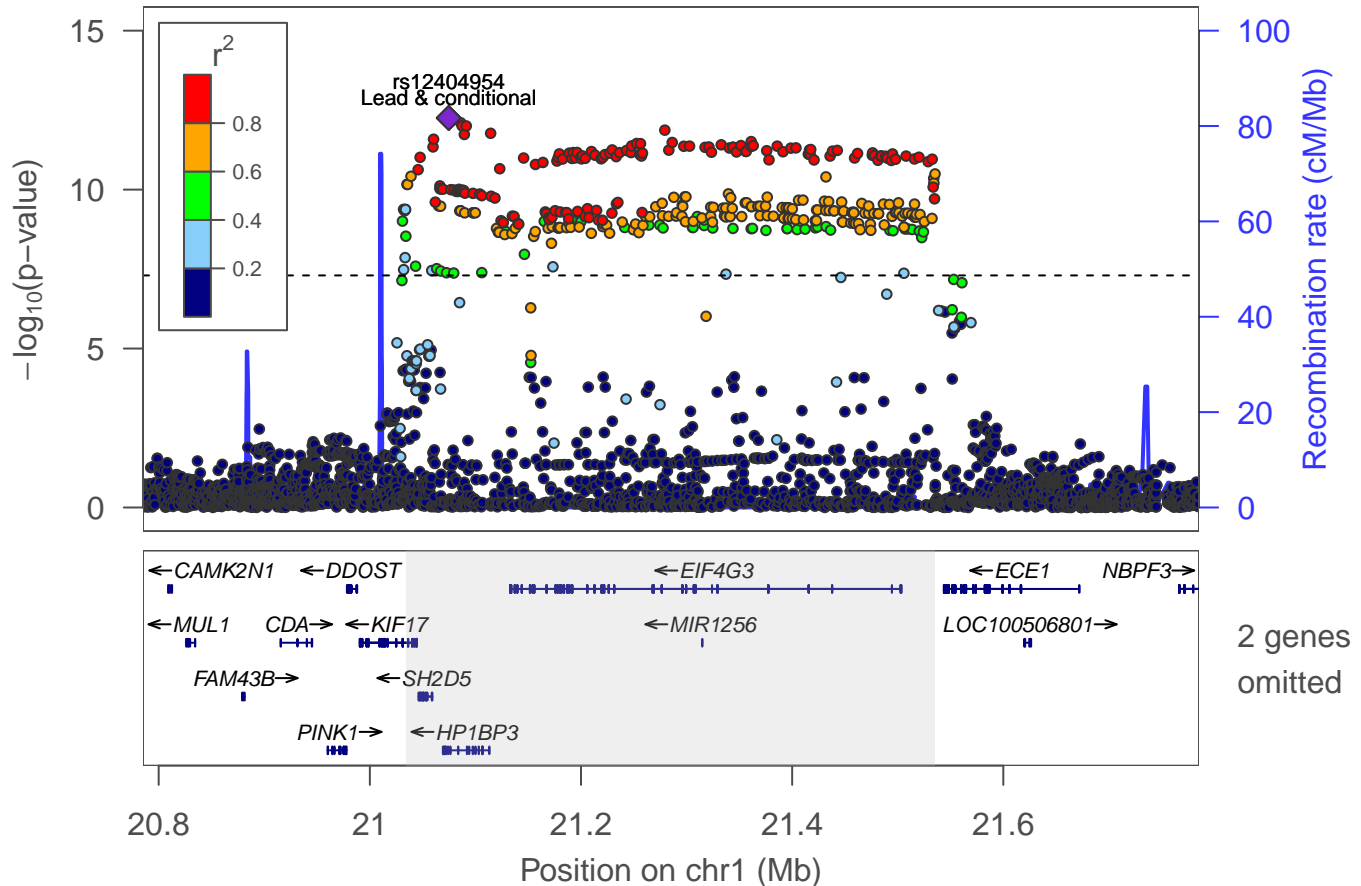



# Adventurousness: locus 2 [chr 1:23.580–23.716Mb]

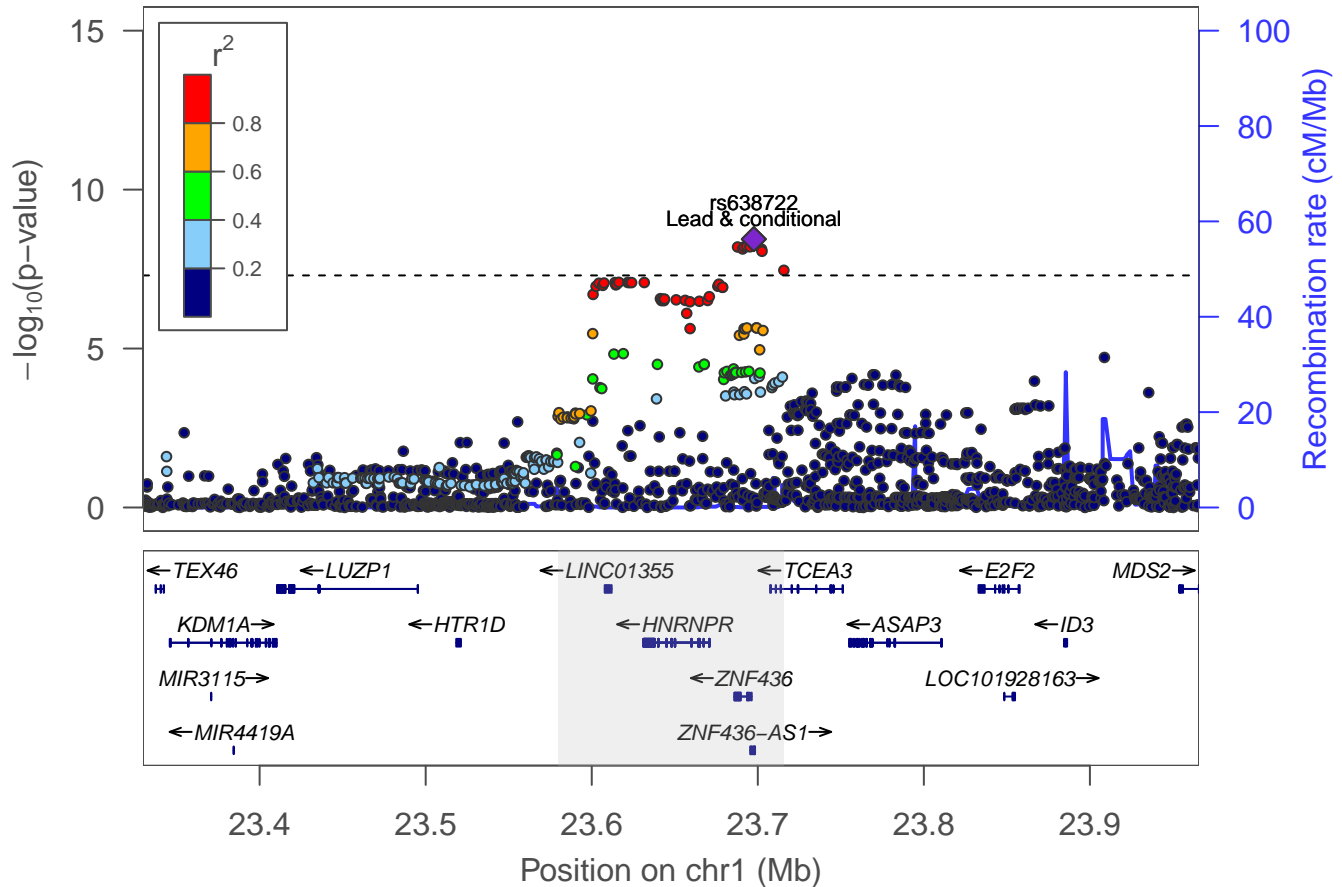

# Adventurousness: locus 3 [chr 1:33.776–33.916Mb]

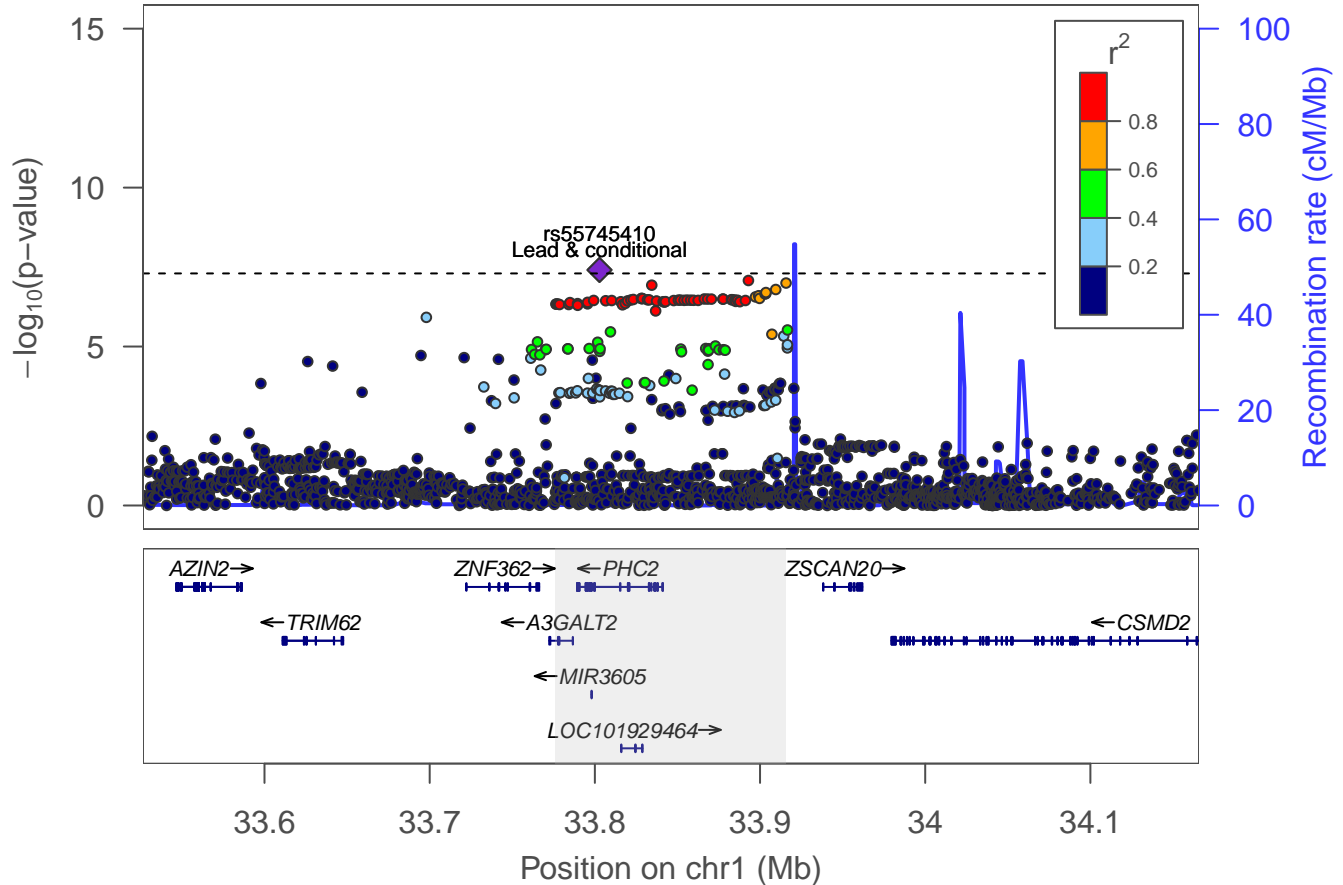

# Adventurousness: locus 4 [chr 1:41.457–41.745Mb]

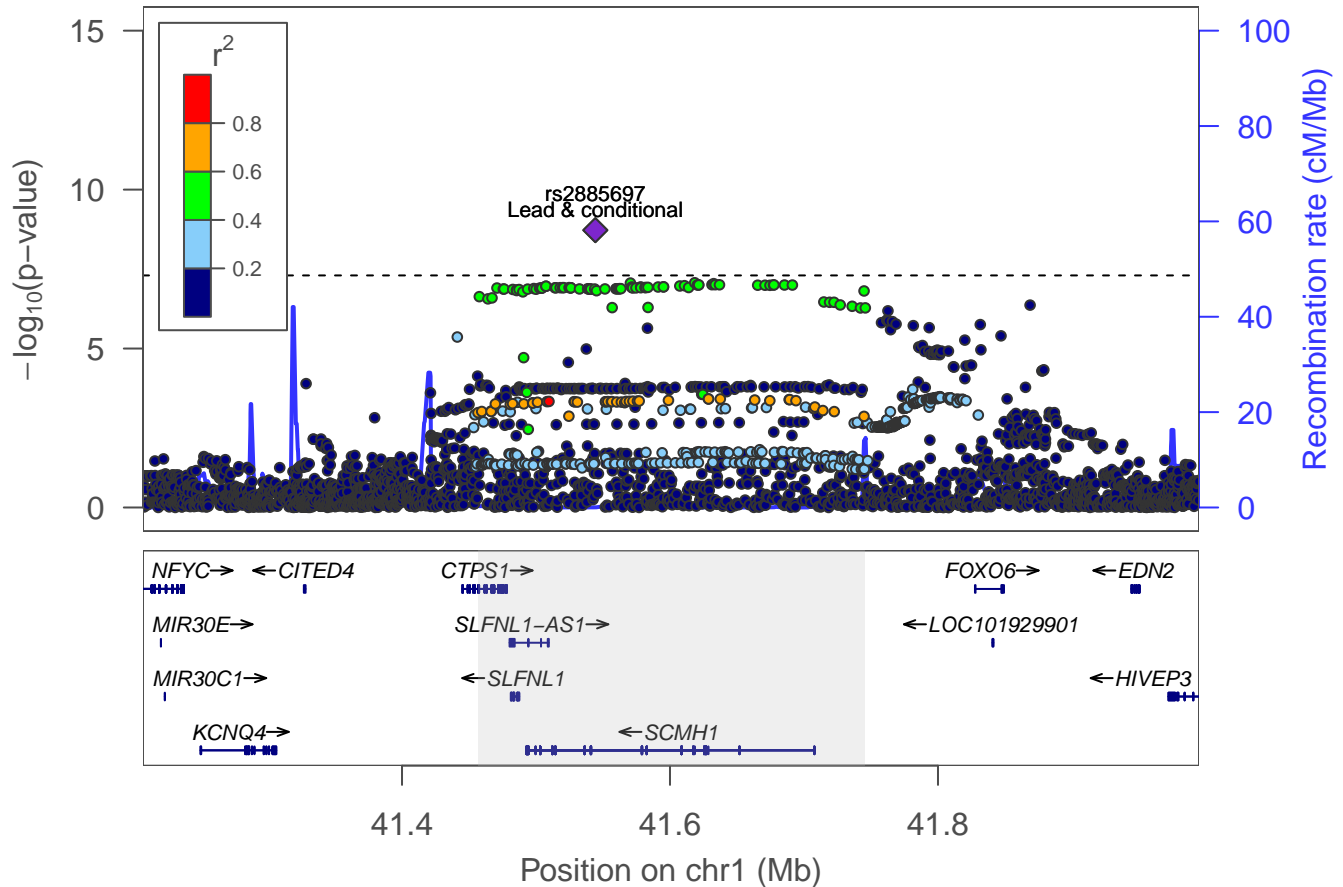

# Adventurousness: locus 5 [chr 1:44.013–44.178Mb]

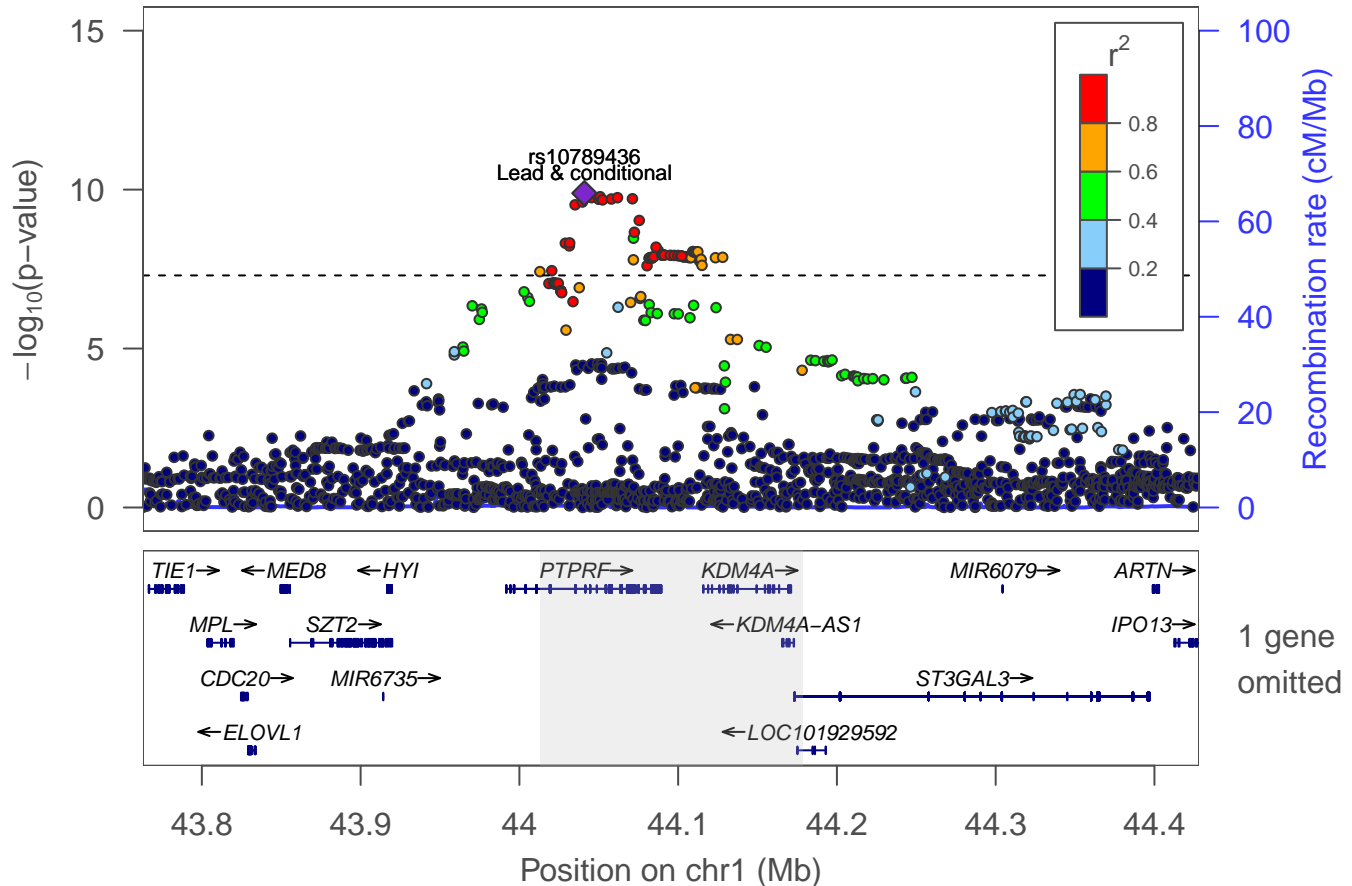

# Adventurousness: locus 6 [chr 1:69.667–69.834Mb]

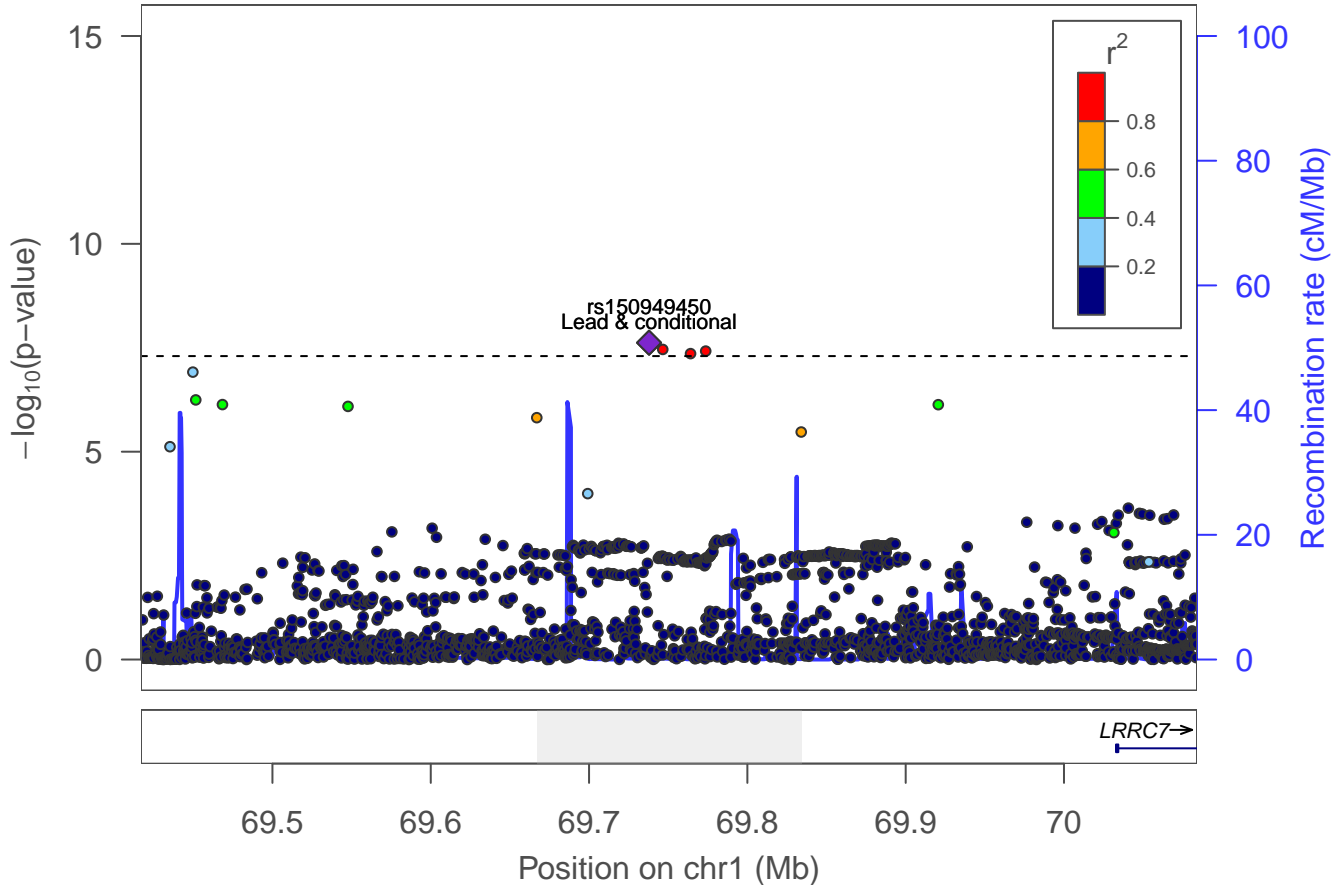

# Adventurousness: locus 7 [chr 1:84.023–84.031Mb]

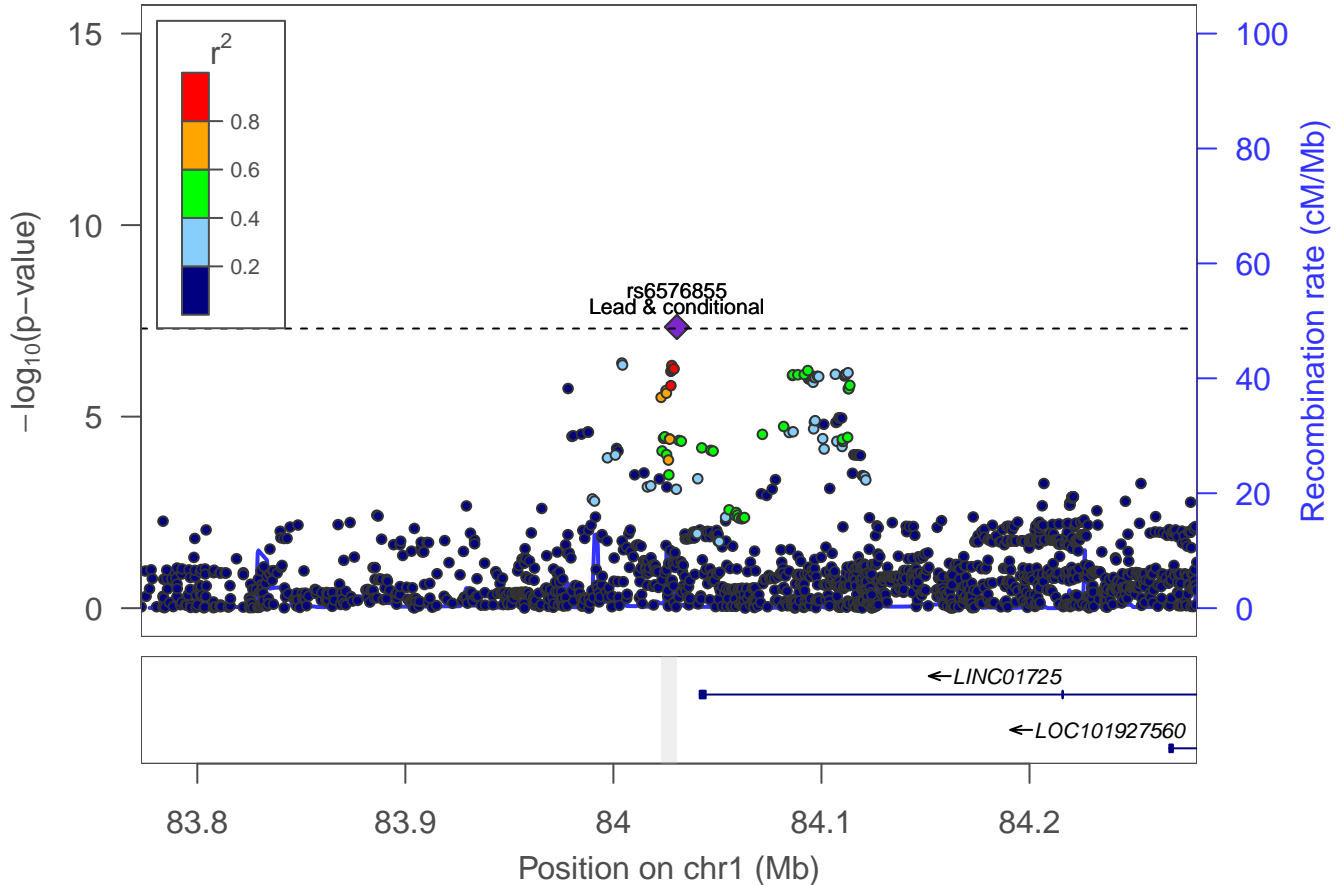

# Adventurousness: locus 8 [chr 1:91.123–91.176Mb]

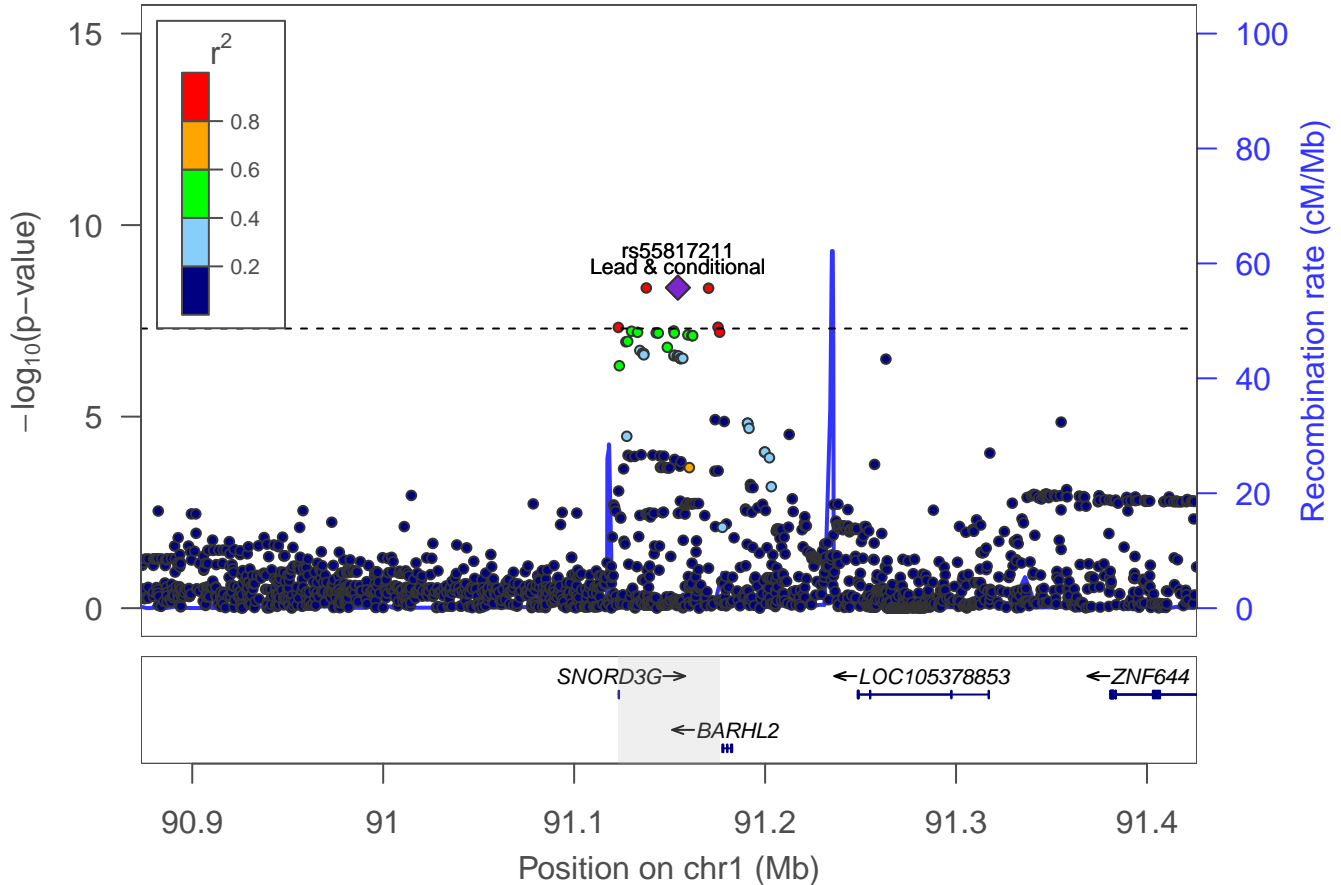

# Adventurousness: Locus 9 [chr 1: 155.033–155.652Mb]

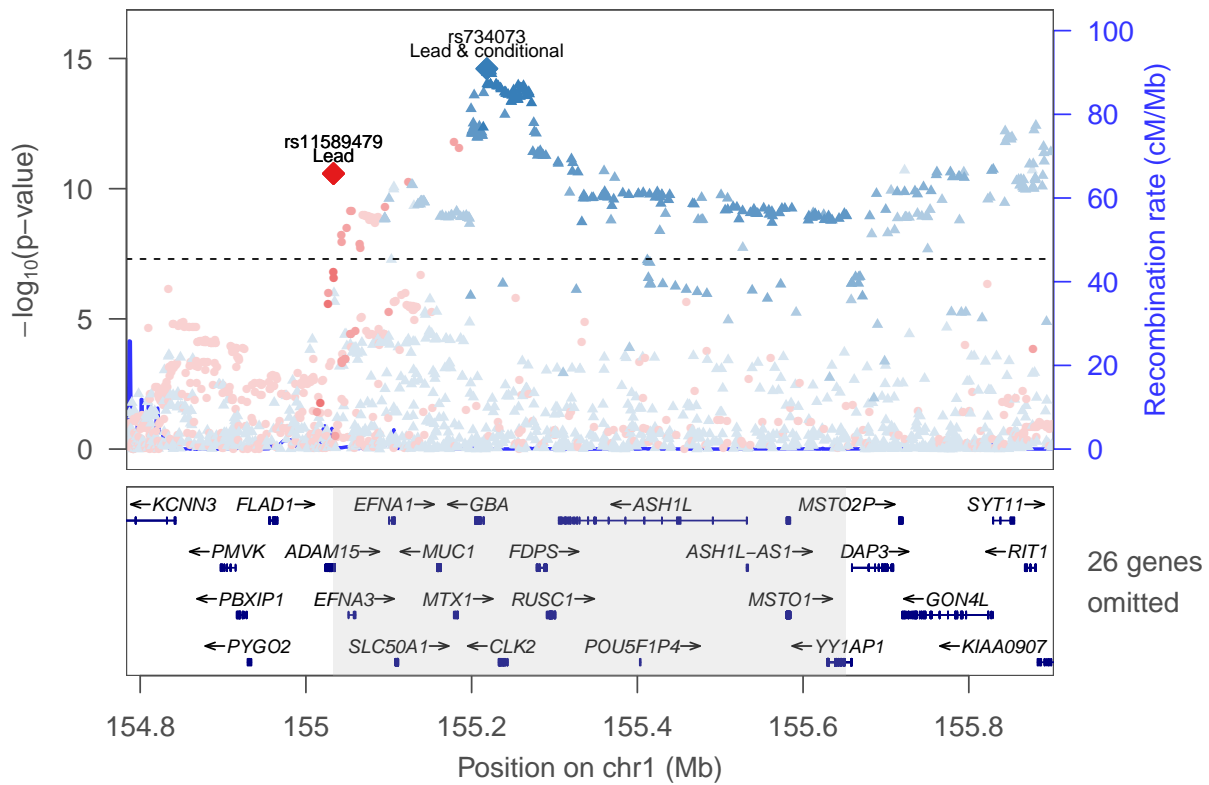

rs734073 ▲  
rs11589479 ●

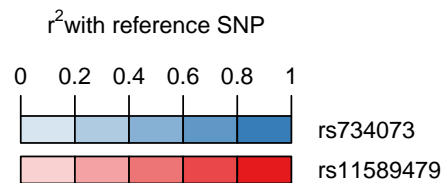



# Adventurousness: locus 10 [chr 1:190.758–191.141Mb]

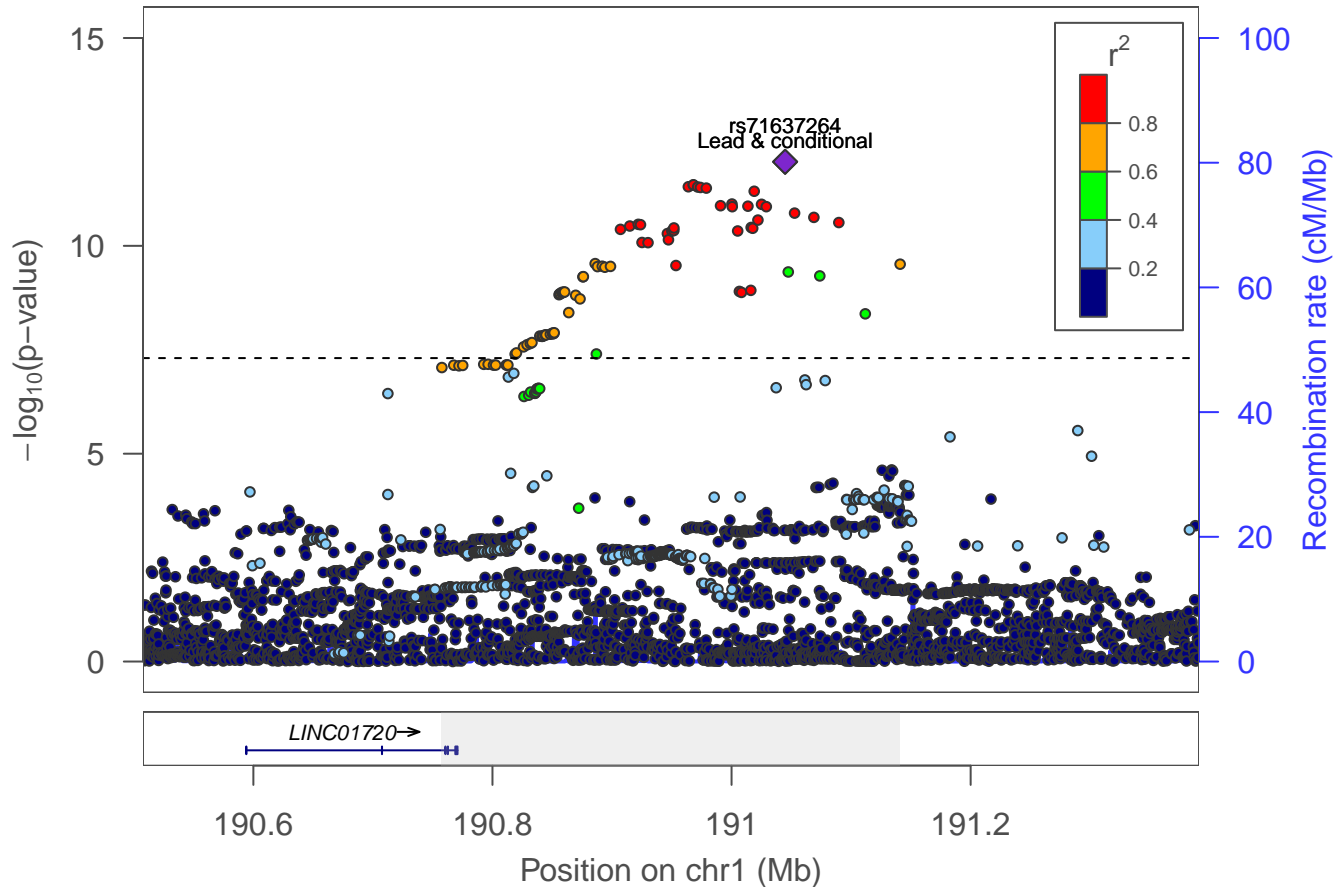

# Adventurousness: Locus 11 [chr 1: 204.912–205.195Mb]

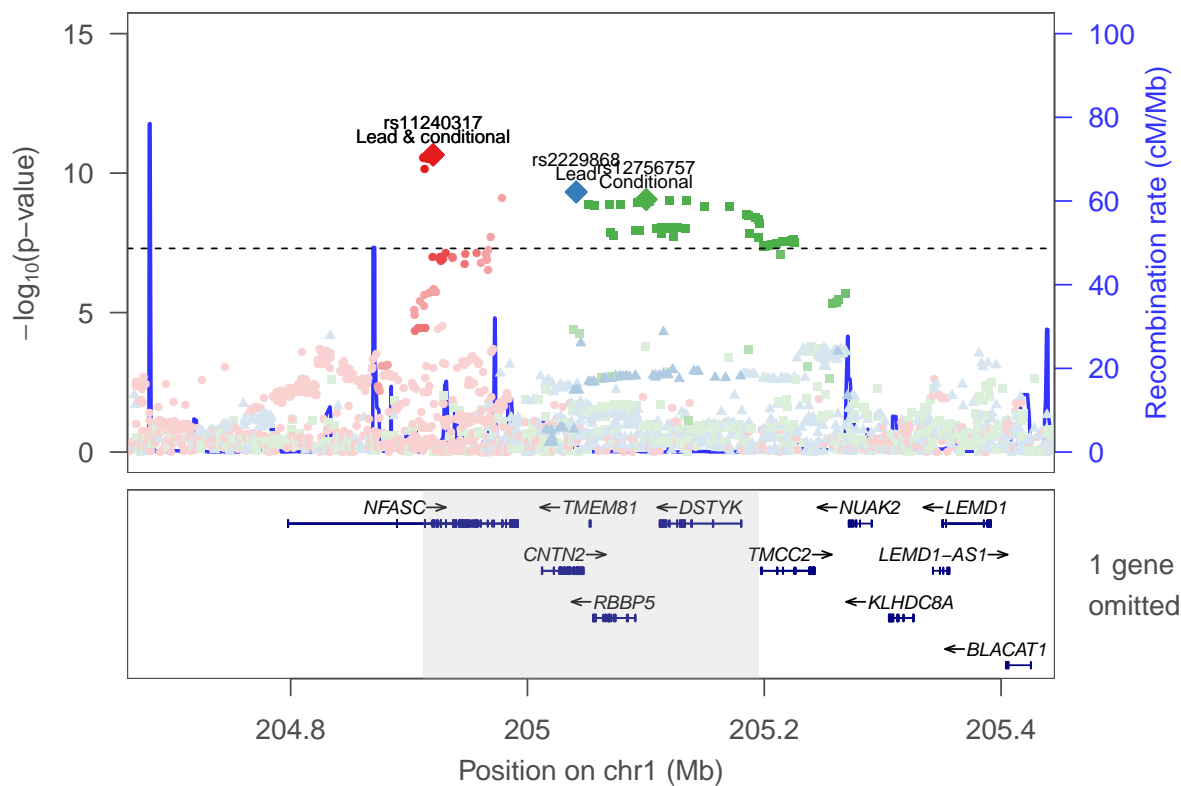

rs12756757 ■  
 rs2229868 ▲  
 rs11240317 ●

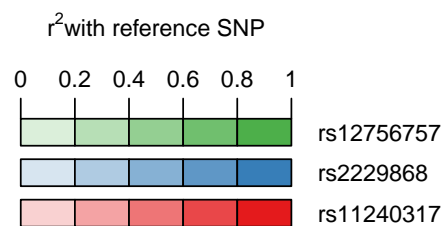

# Adventurousness: locus 12 [chr 1:208.035–208.039Mb]

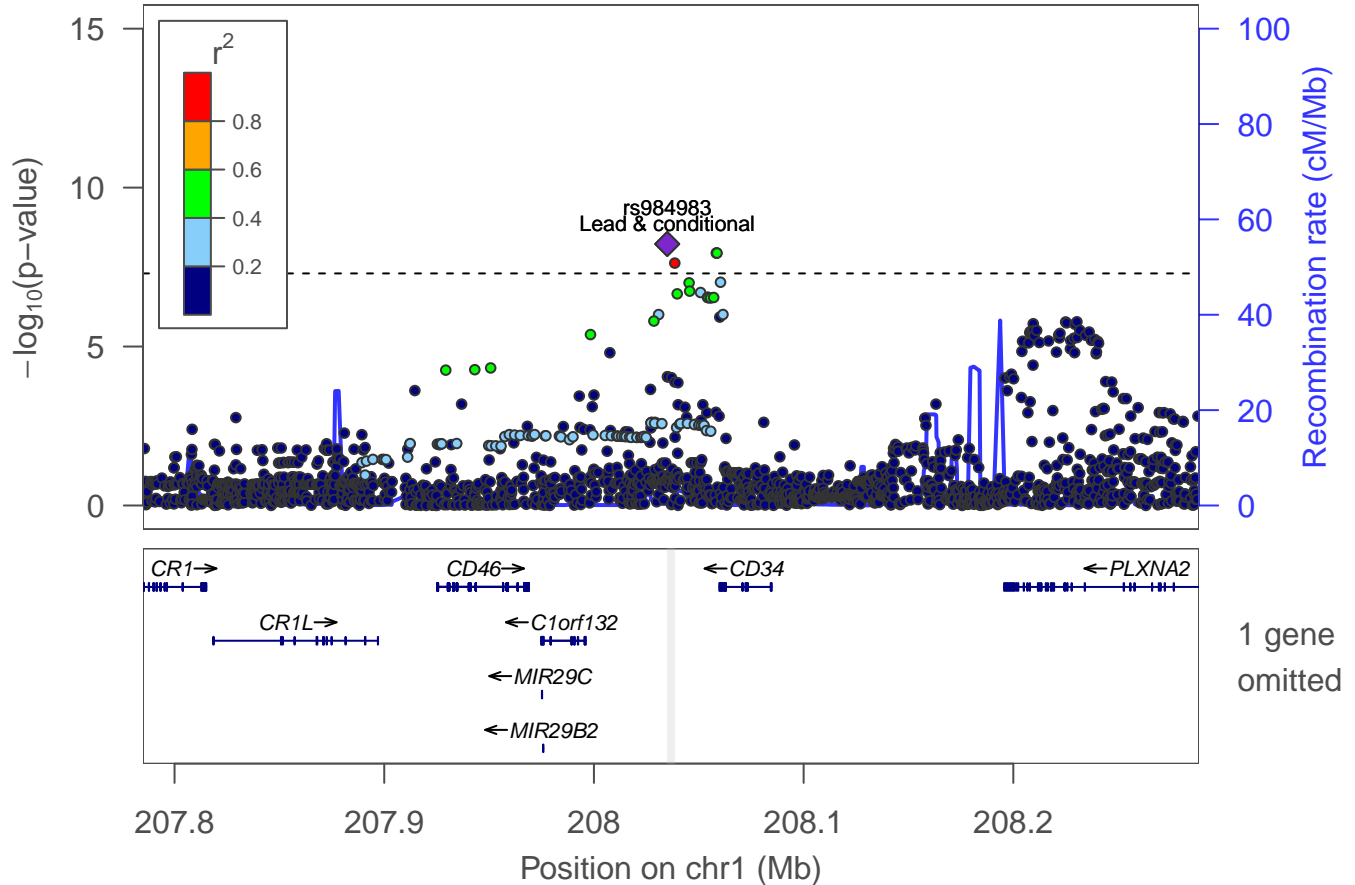

# Adventurousness: locus 13 [chr 1:216.830–216.920Mb]

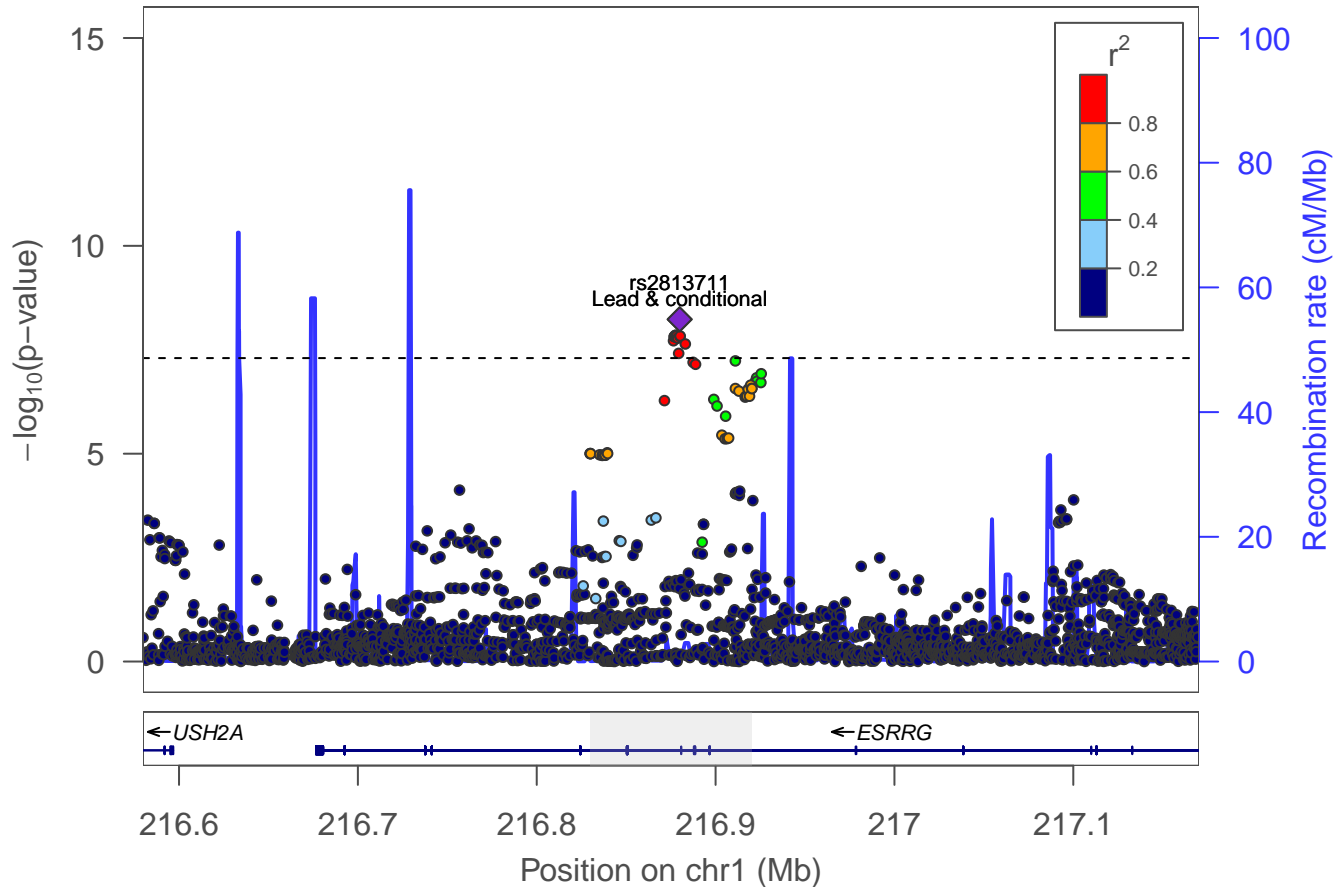

# Adventurousness: locus 14 [chr 1:243.504–243.555Mb]

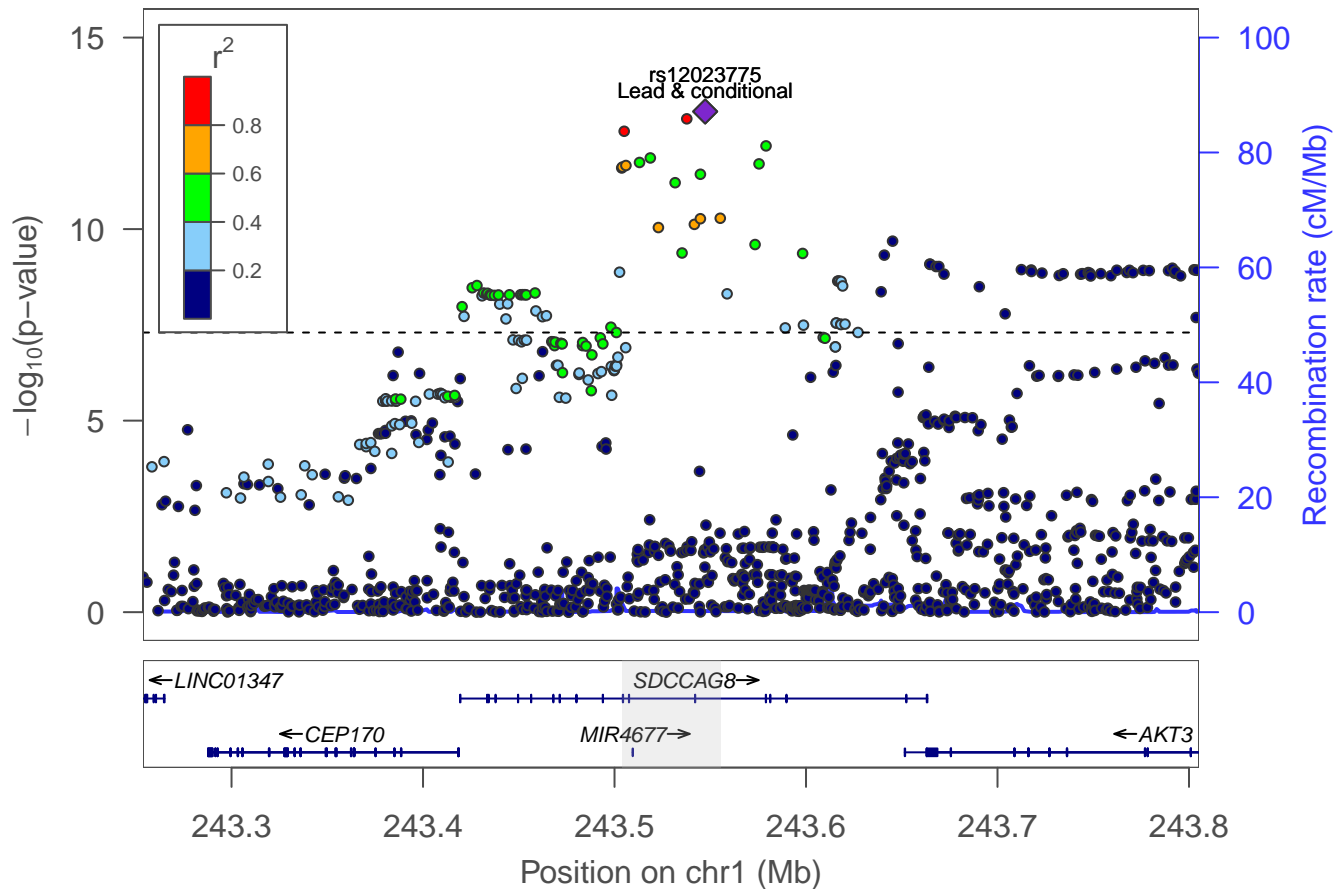

# Adventurousness: Locus 15 [chr 1: 244.016–244.026Mb]

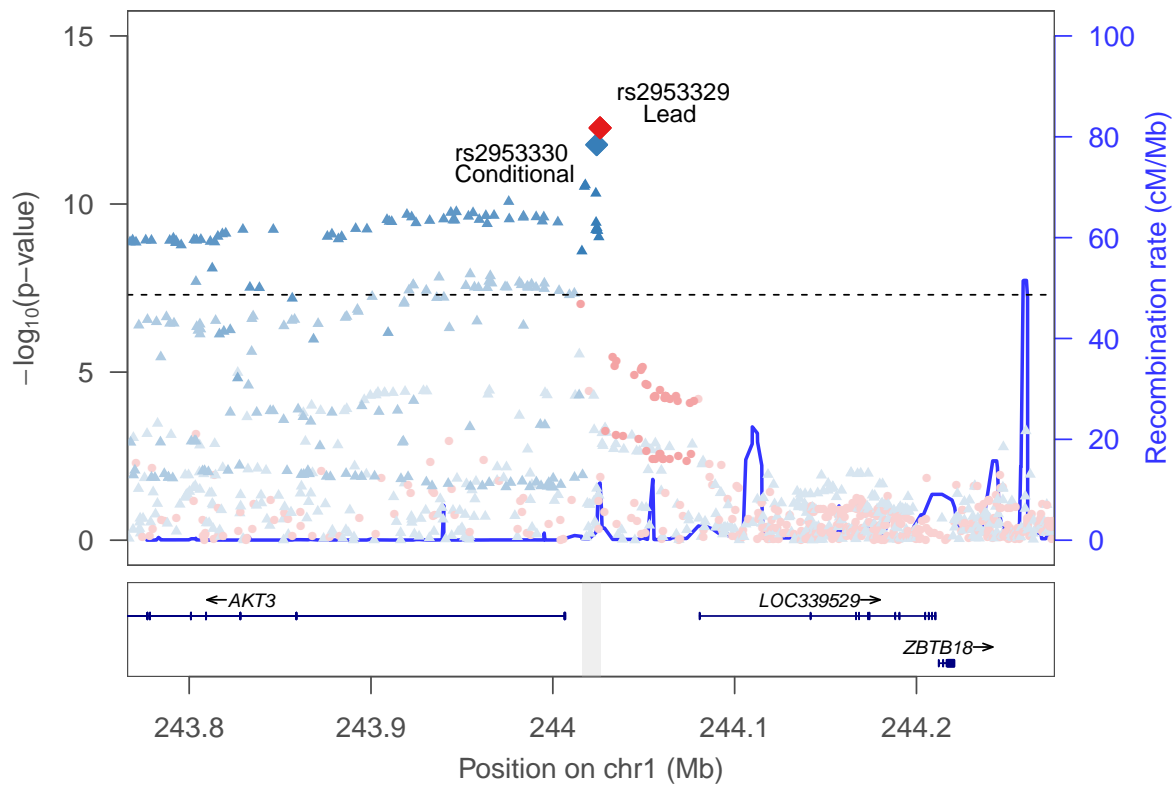

rs2953330 ▲  
rs2953329 ●

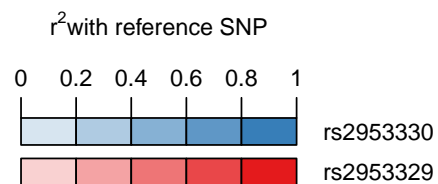

# Adventurousness: locus 16 [chr 2:0.211–0.305Mb]

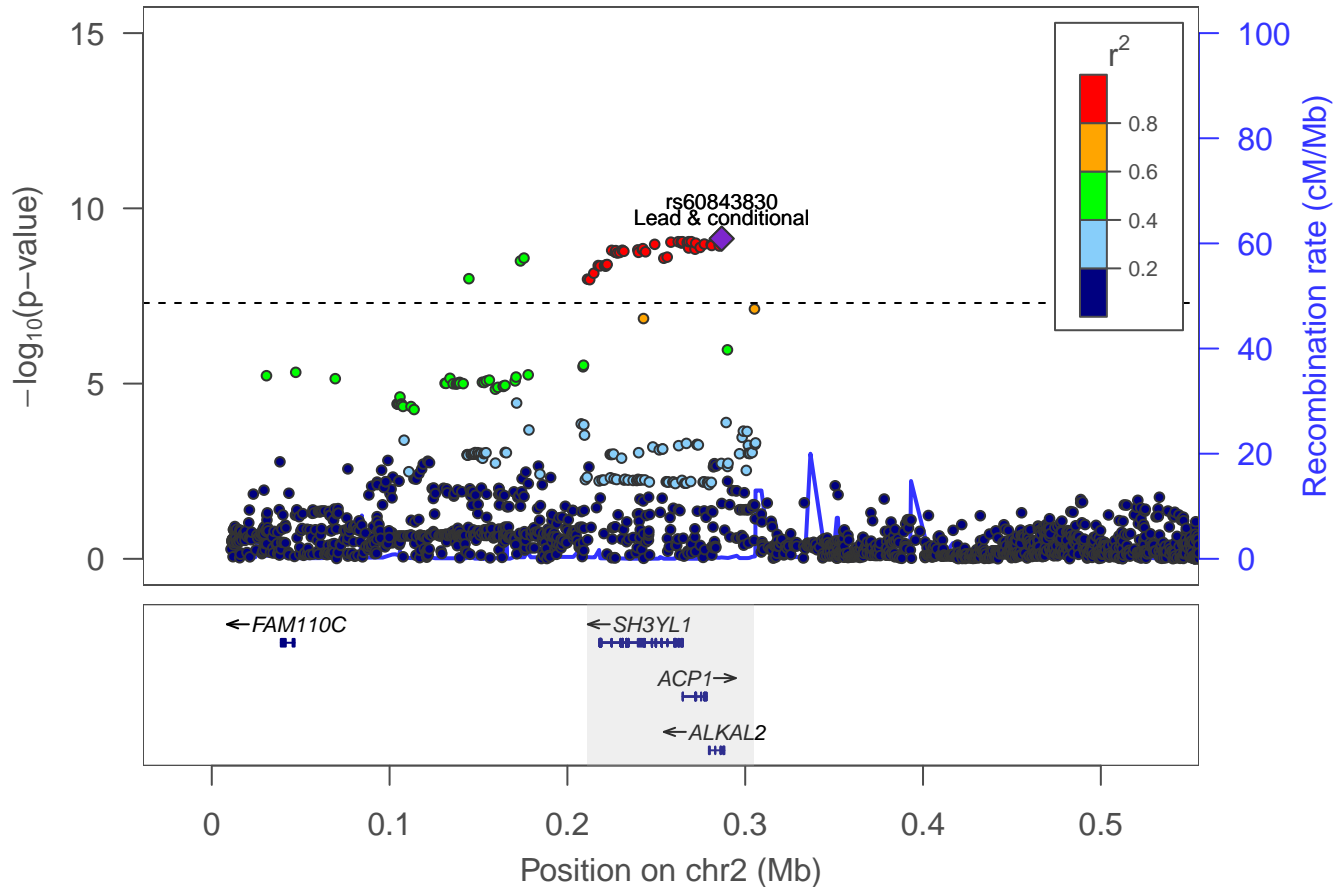

# Adventurousness: Locus 17 [chr 2: 2.169–2.222Mb]

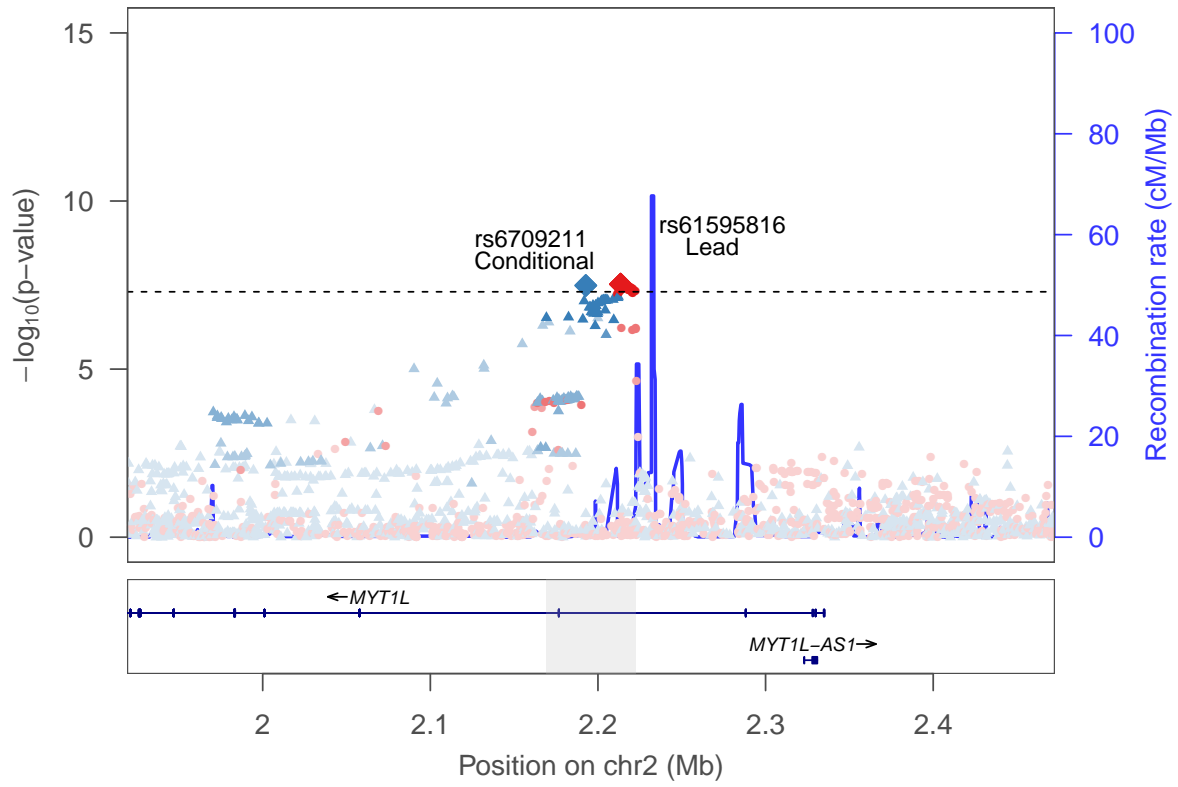

rs6709211 ▲  
rs61595816 ●

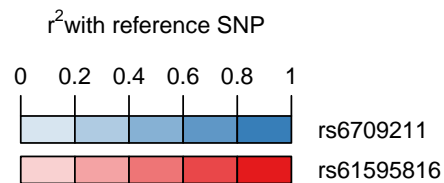



# Adventurousness: locus 18 [chr 2:6.800–6.833Mb]

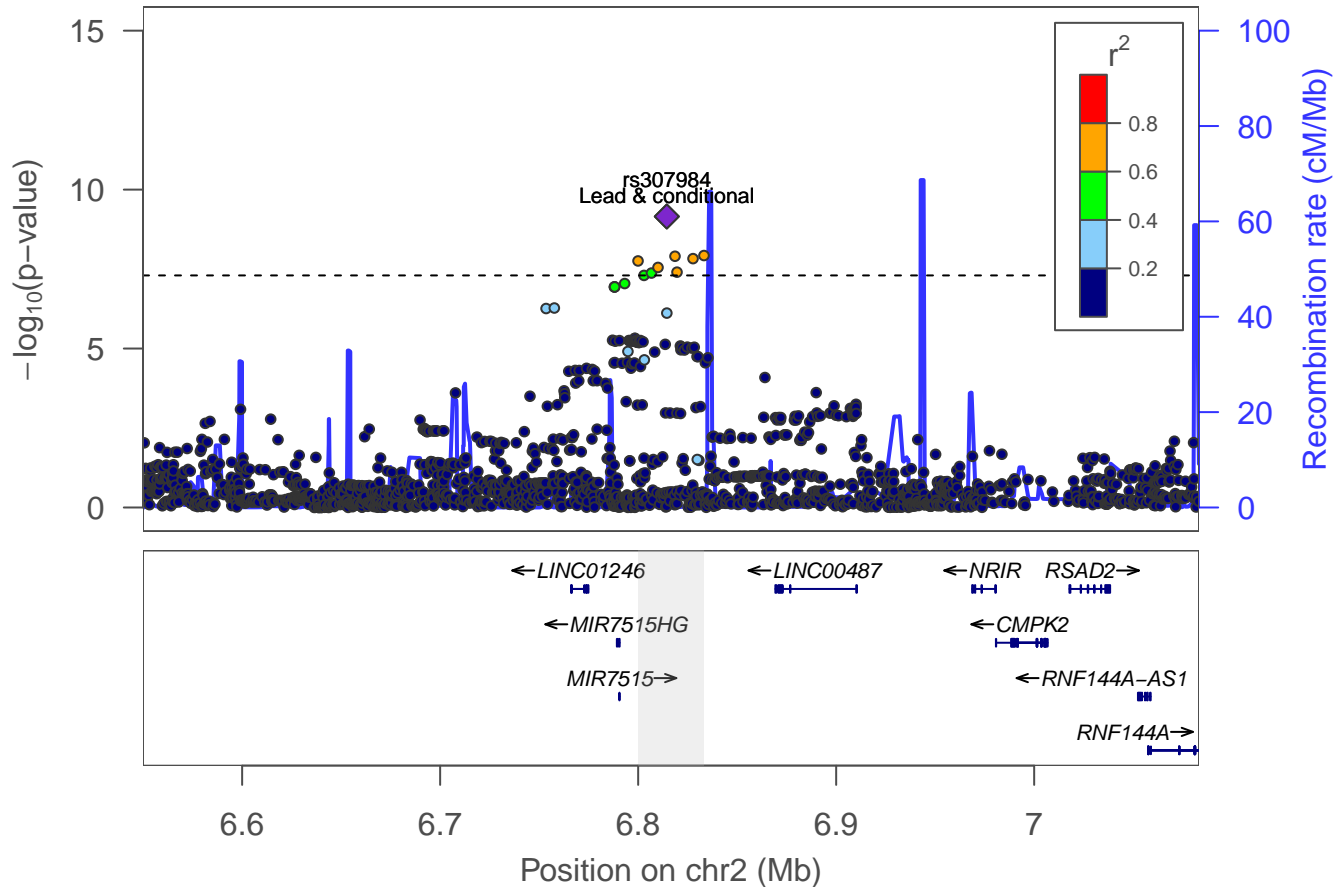

# Adventurousness: Locus 19 [chr 2: 44.529–44.879Mb]

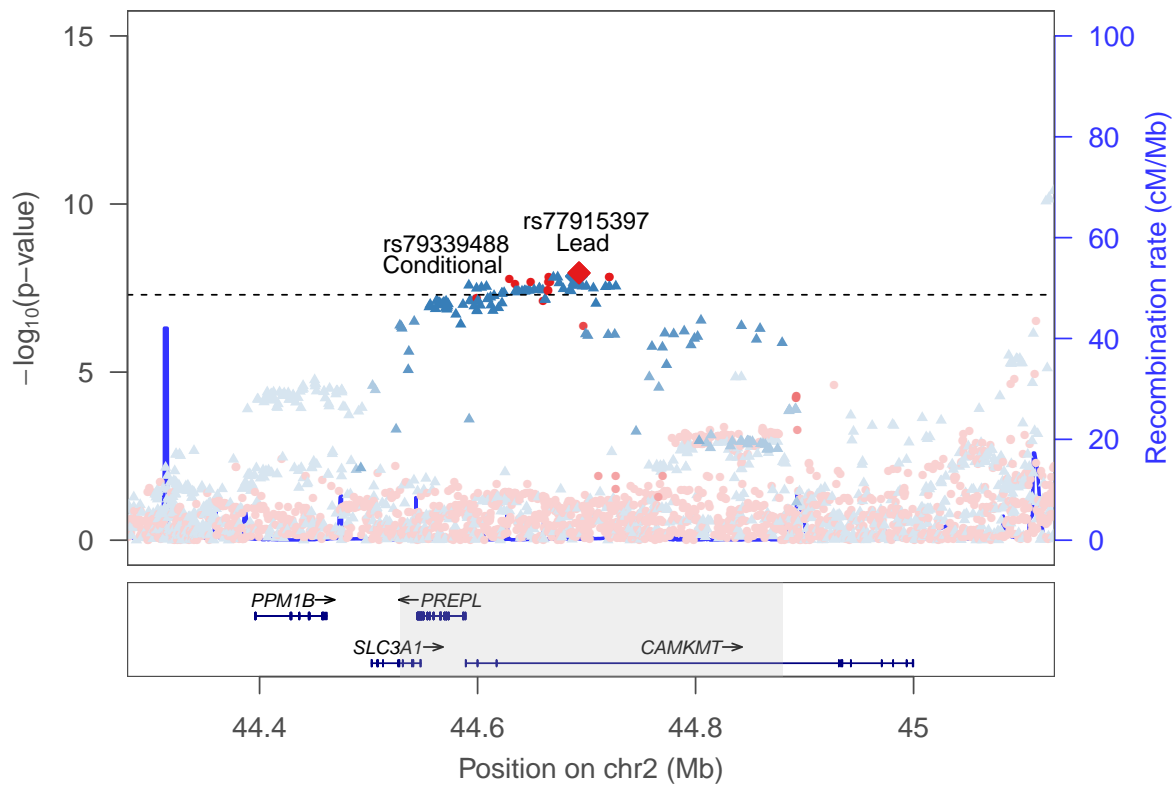

rs79339488 ▲  
rs77915397 ●

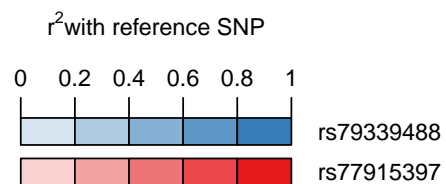

# Adventurousness: locus 20 [chr 2:45.140–45.176Mb]

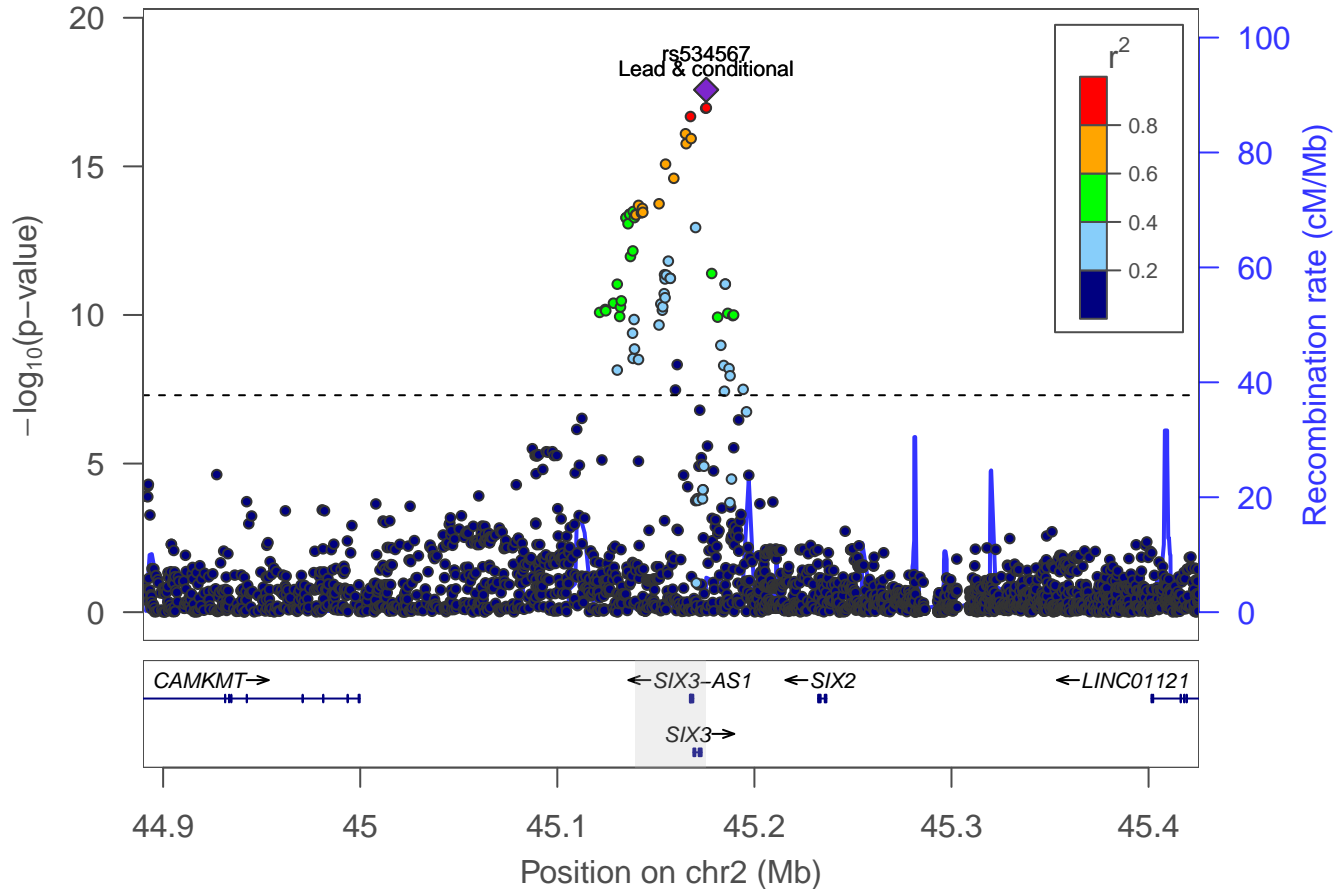

# Adventurousness: locus 21 [chr 2:140.192–140.462Mb]

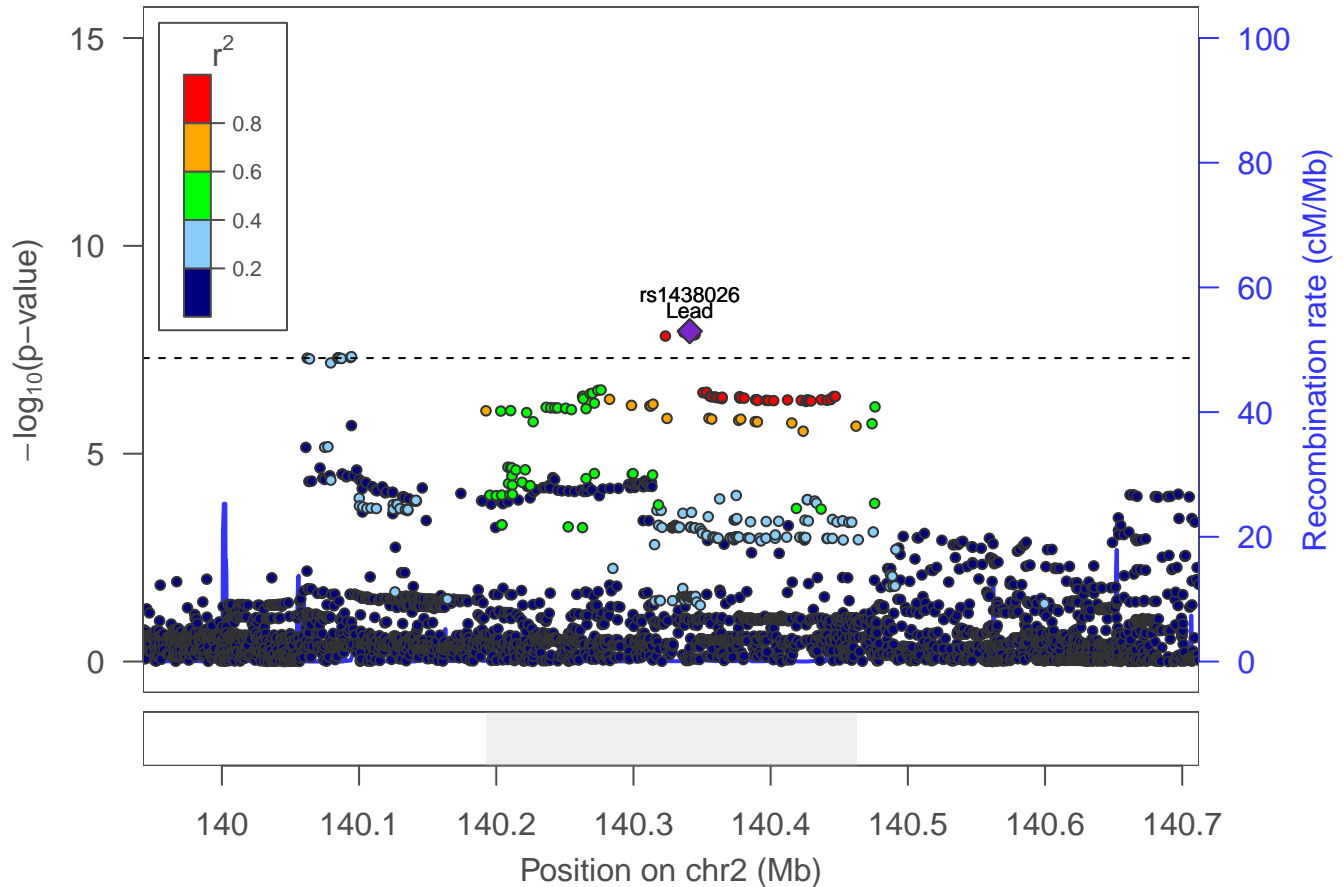

# Adventurousness: locus 22 [chr 2:140.752–140.810Mb]

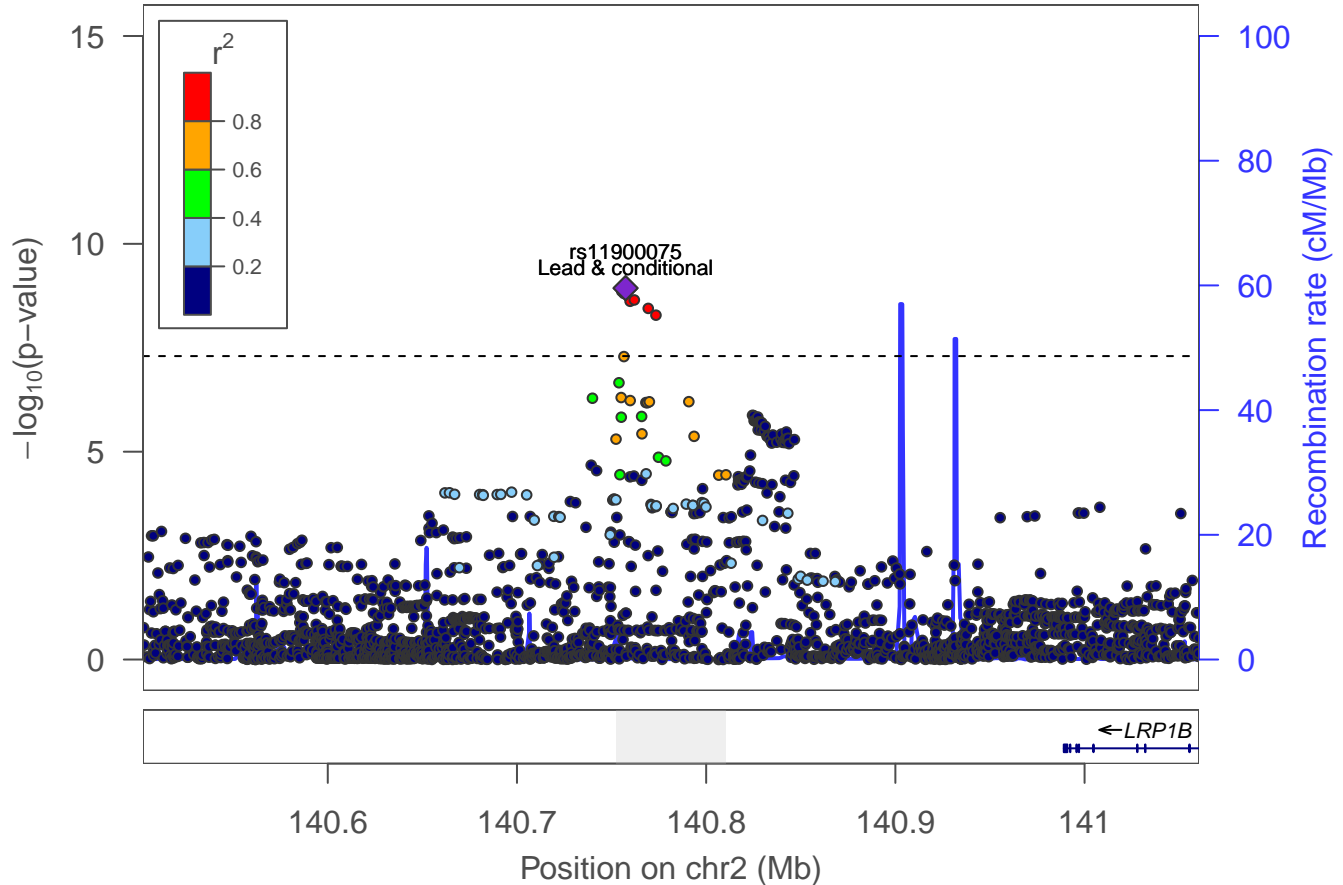

# Adventurousness: locus 23 [chr 2:145.631–145.840Mb]

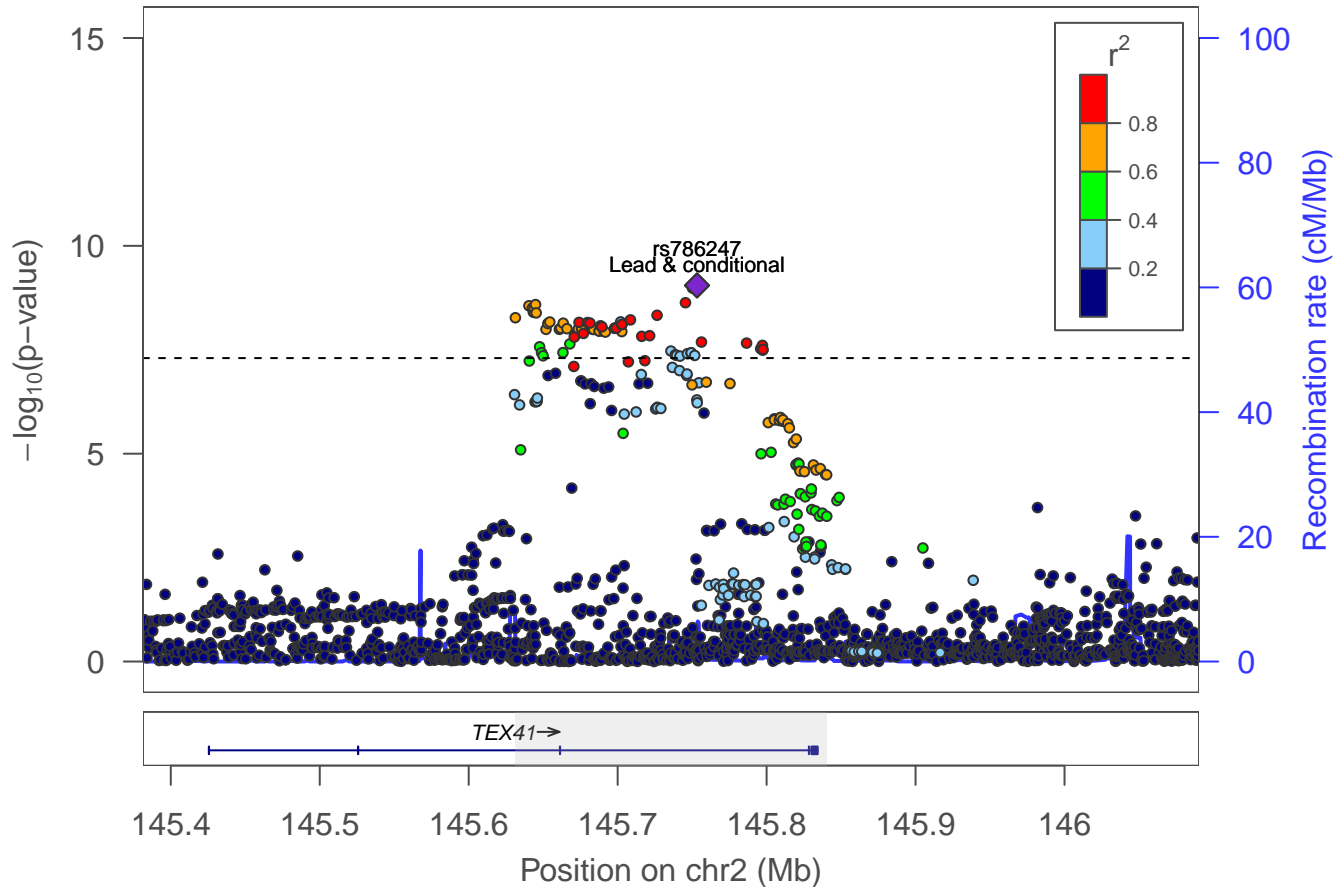

# Adventurousness: Locus 24 [chr 2: 148.261–148.275Mb]

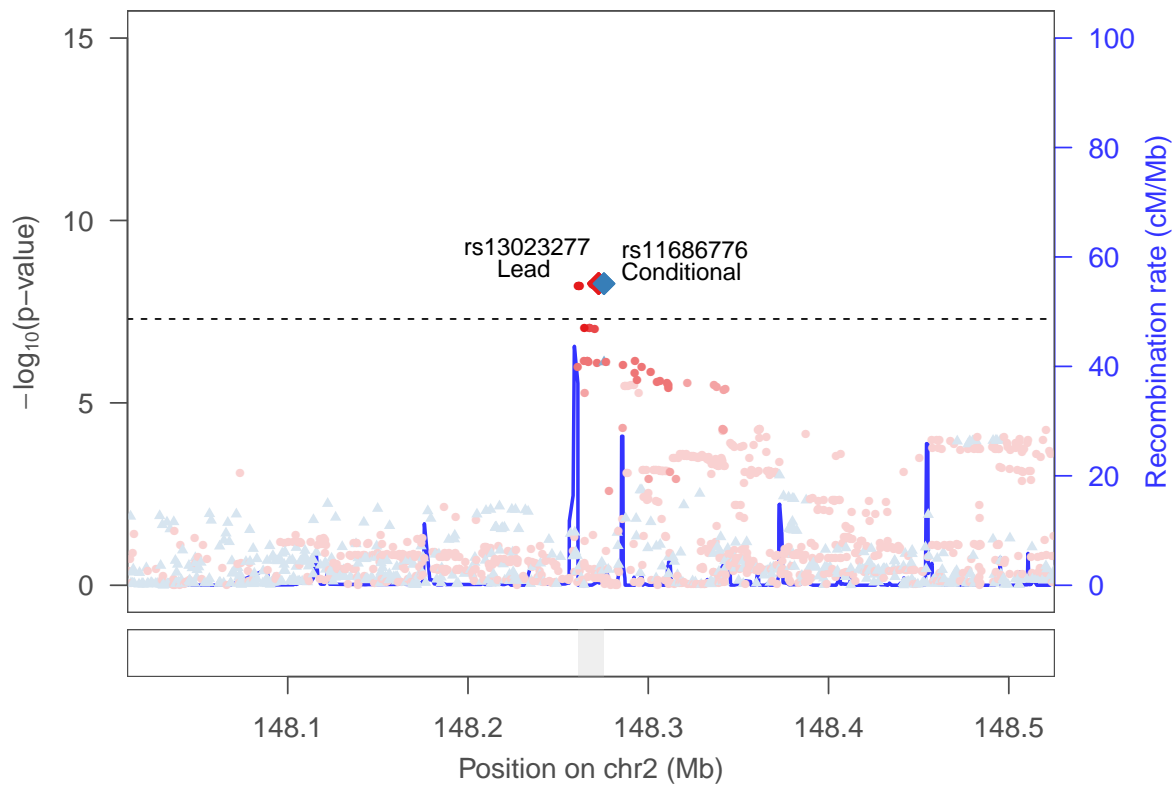

rs11686776 ▲  
rs13023277 ●

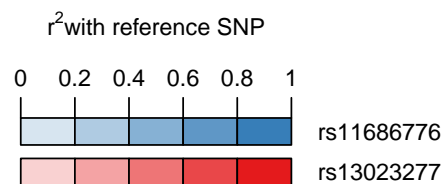

# Adventurousness: locus 25 [chr 2:165.133–165.203Mb]

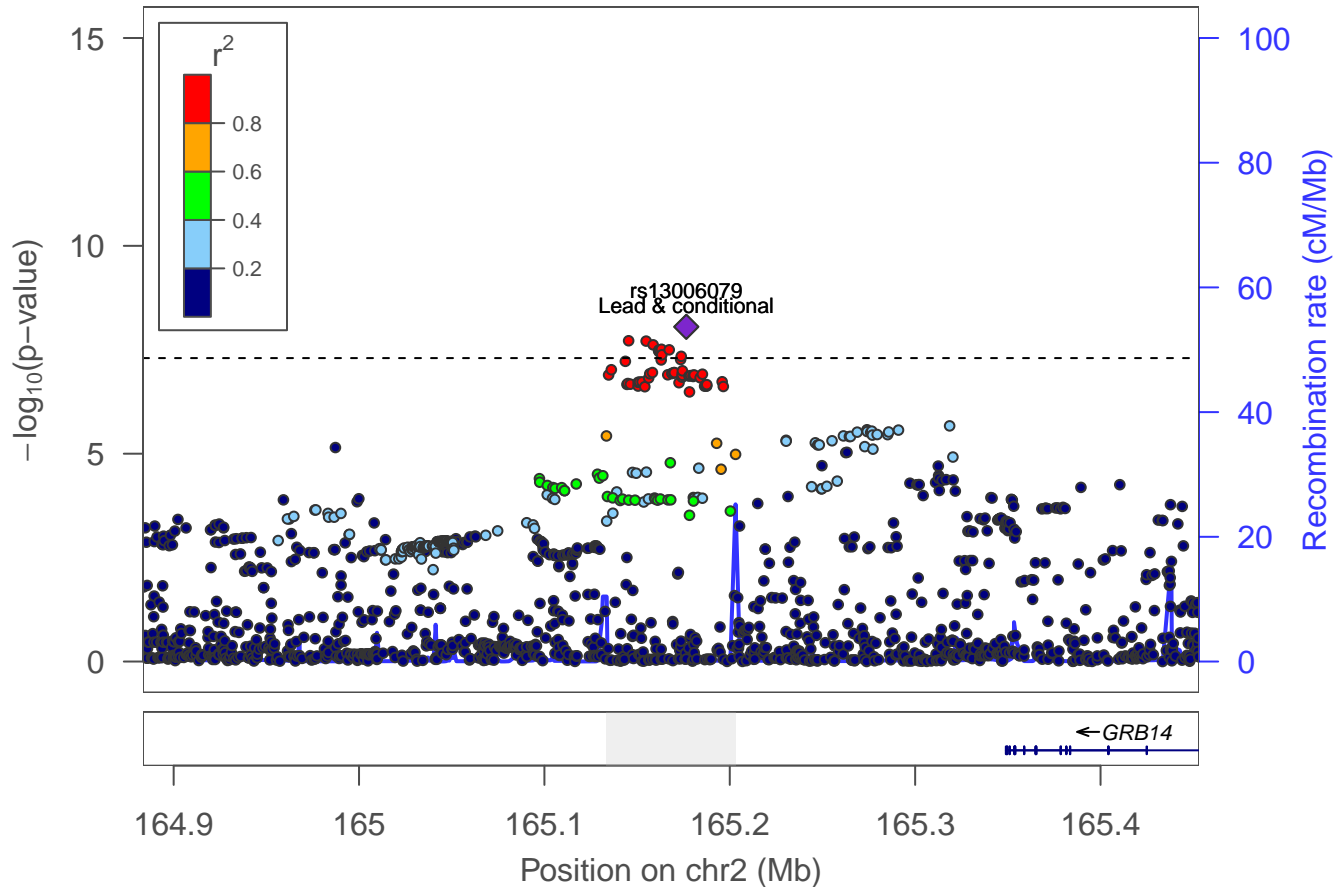



# Adventurousness: locus 26 [chr 2:192.801–192.864Mb]

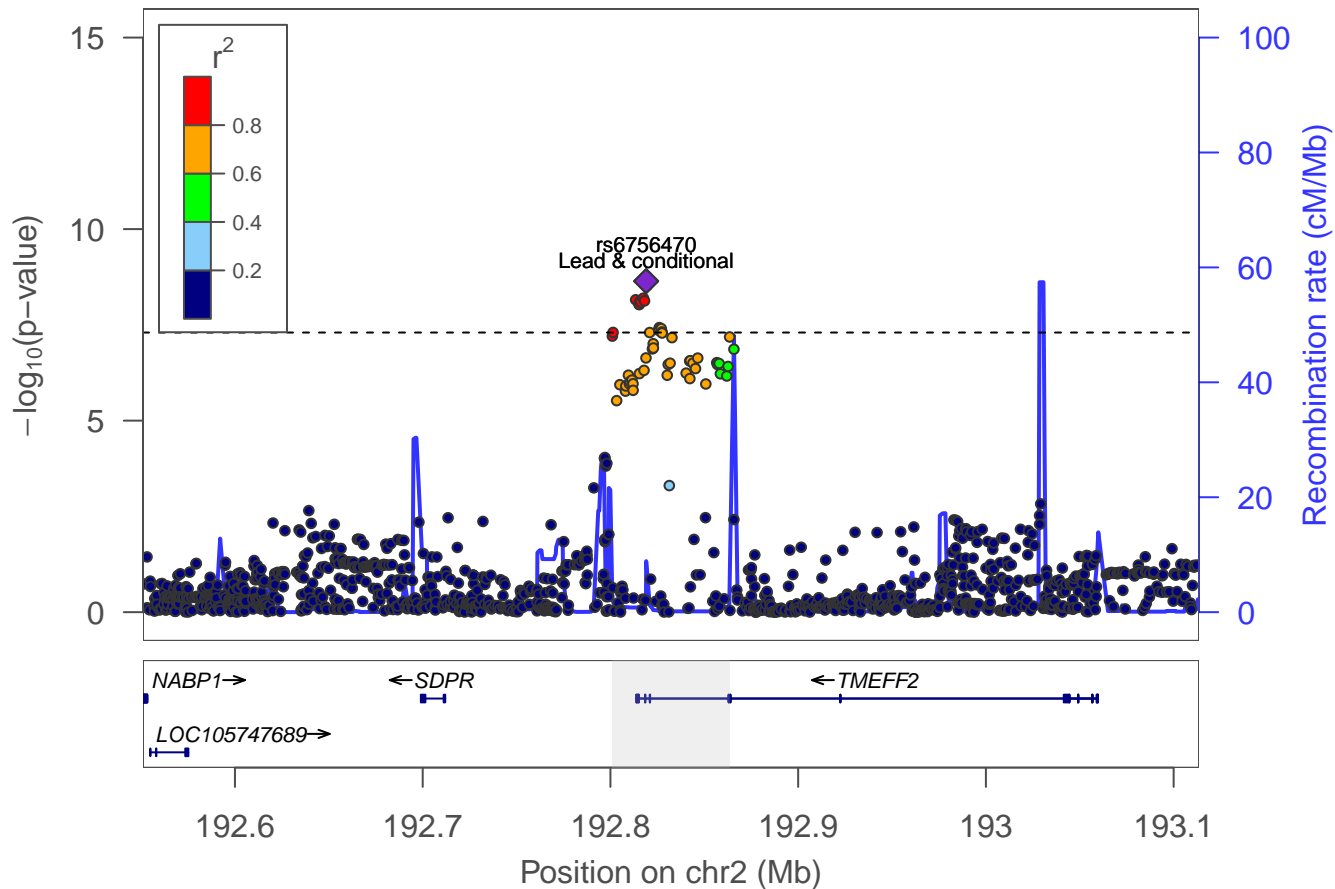

# Adventurousness: locus 27 [chr 2:210.073–210.111Mb]

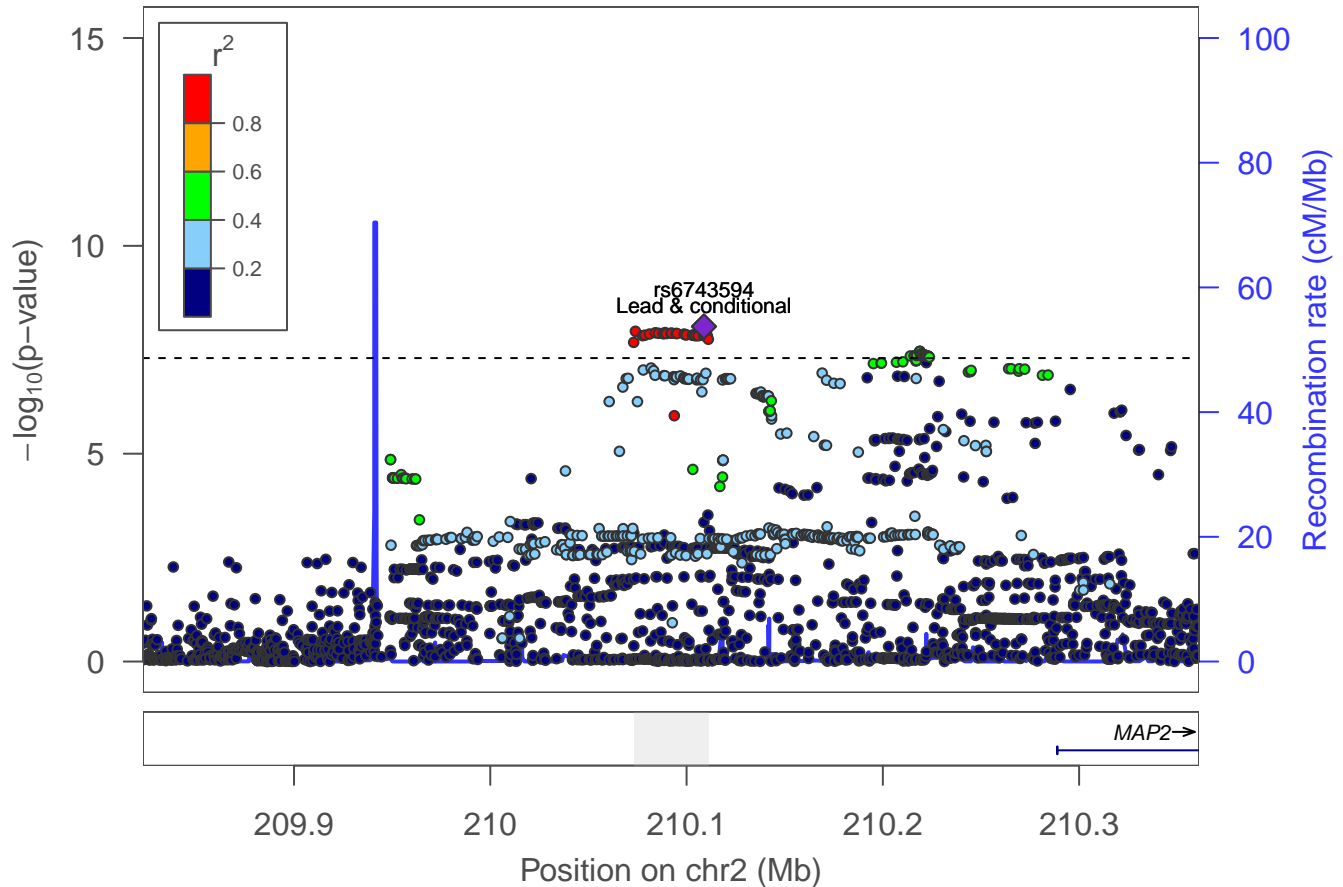

# Adventurousness: locus 28 [chr 3:3.879–3.881Mb]

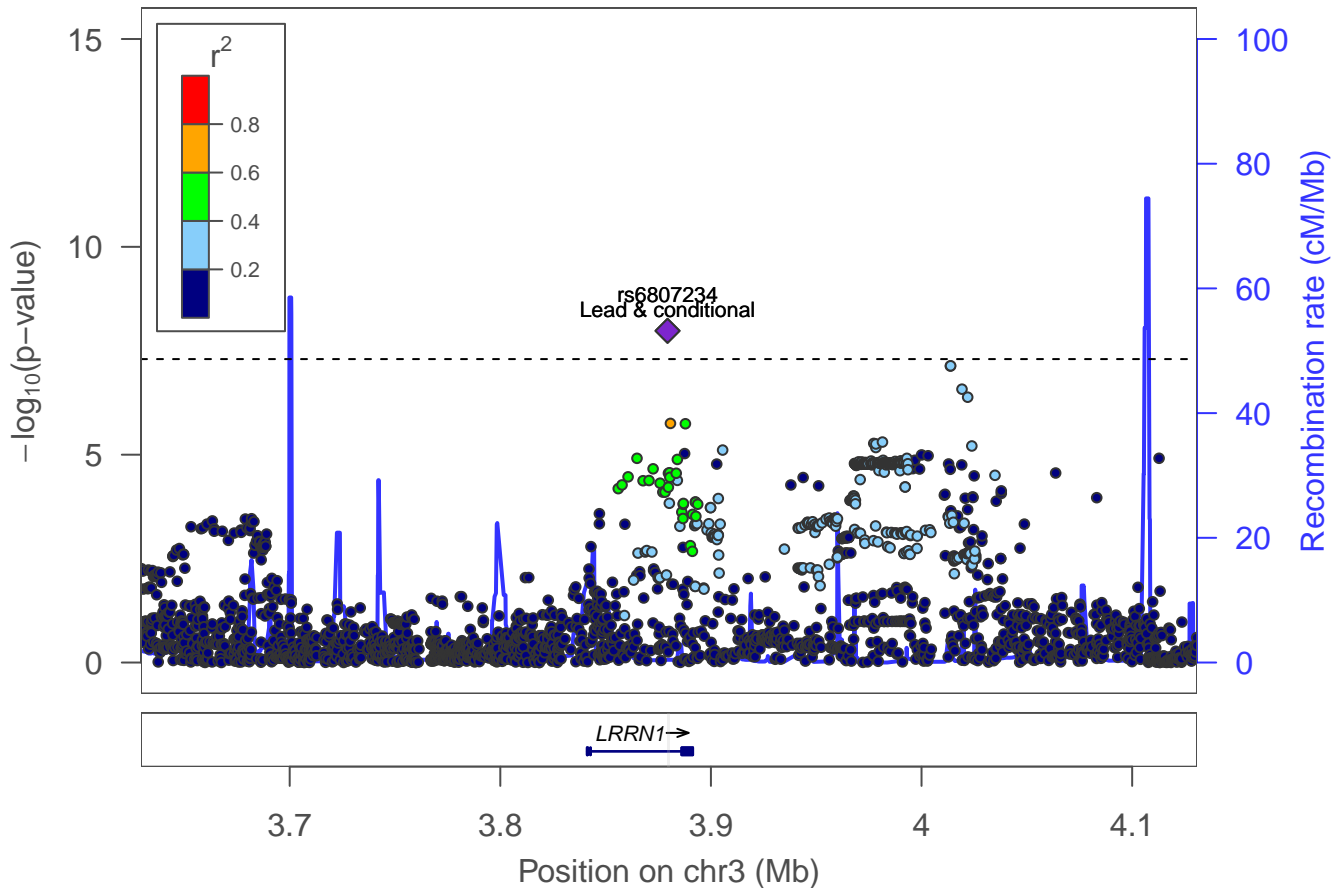

# Adventurousness: Locus 29 [chr 3: 18.670–18.729Mb]

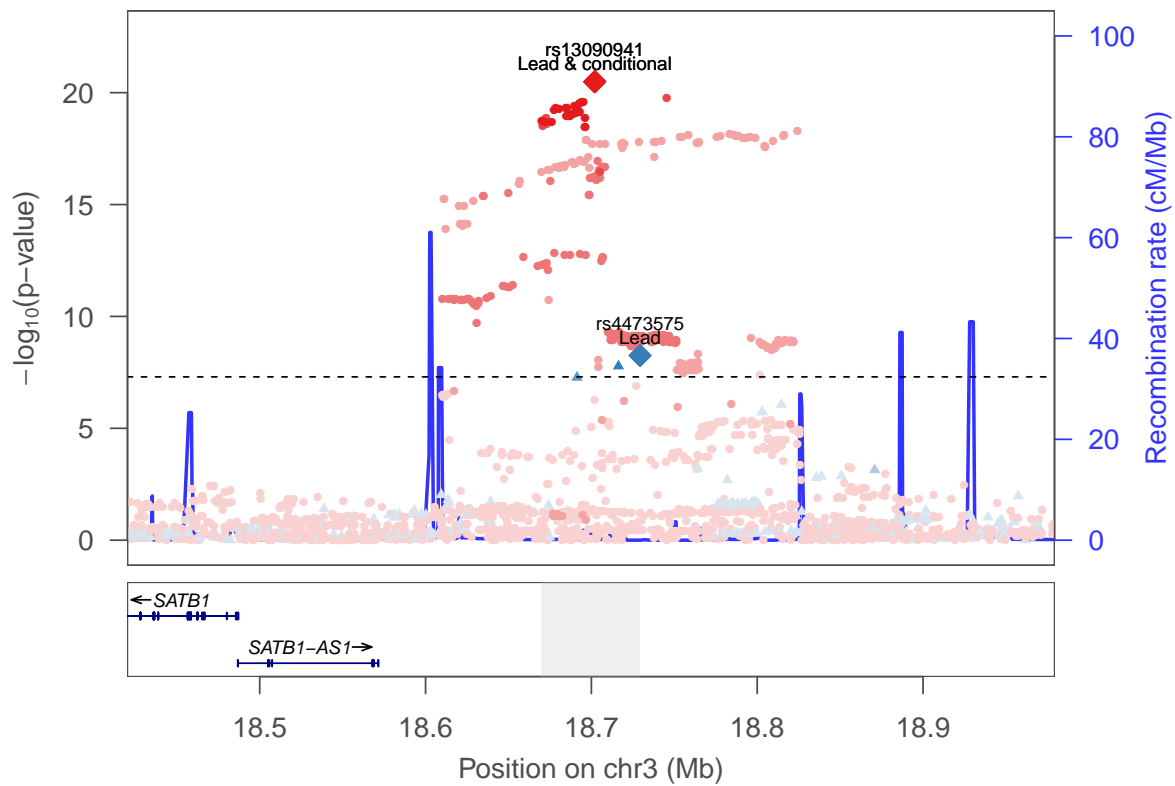

rs4473575 ▲  
rs13090941 ●

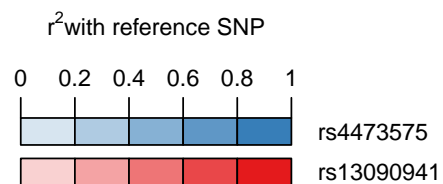

# Adventurousness: locus 30 [chr 3:25.147–25.183Mb]

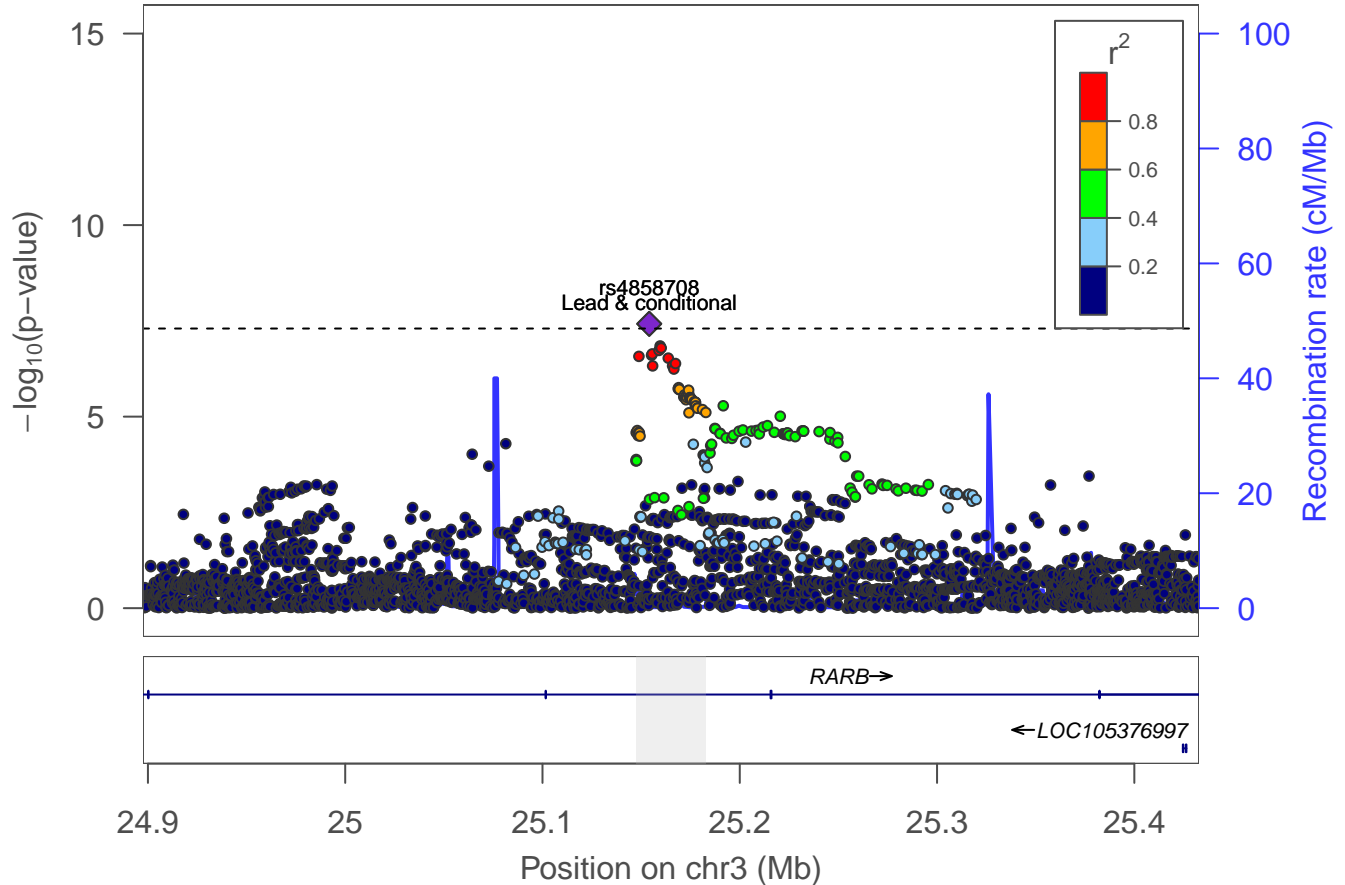

# Adventurousness: locus 31 [chr 3:43.953–44.077Mb]

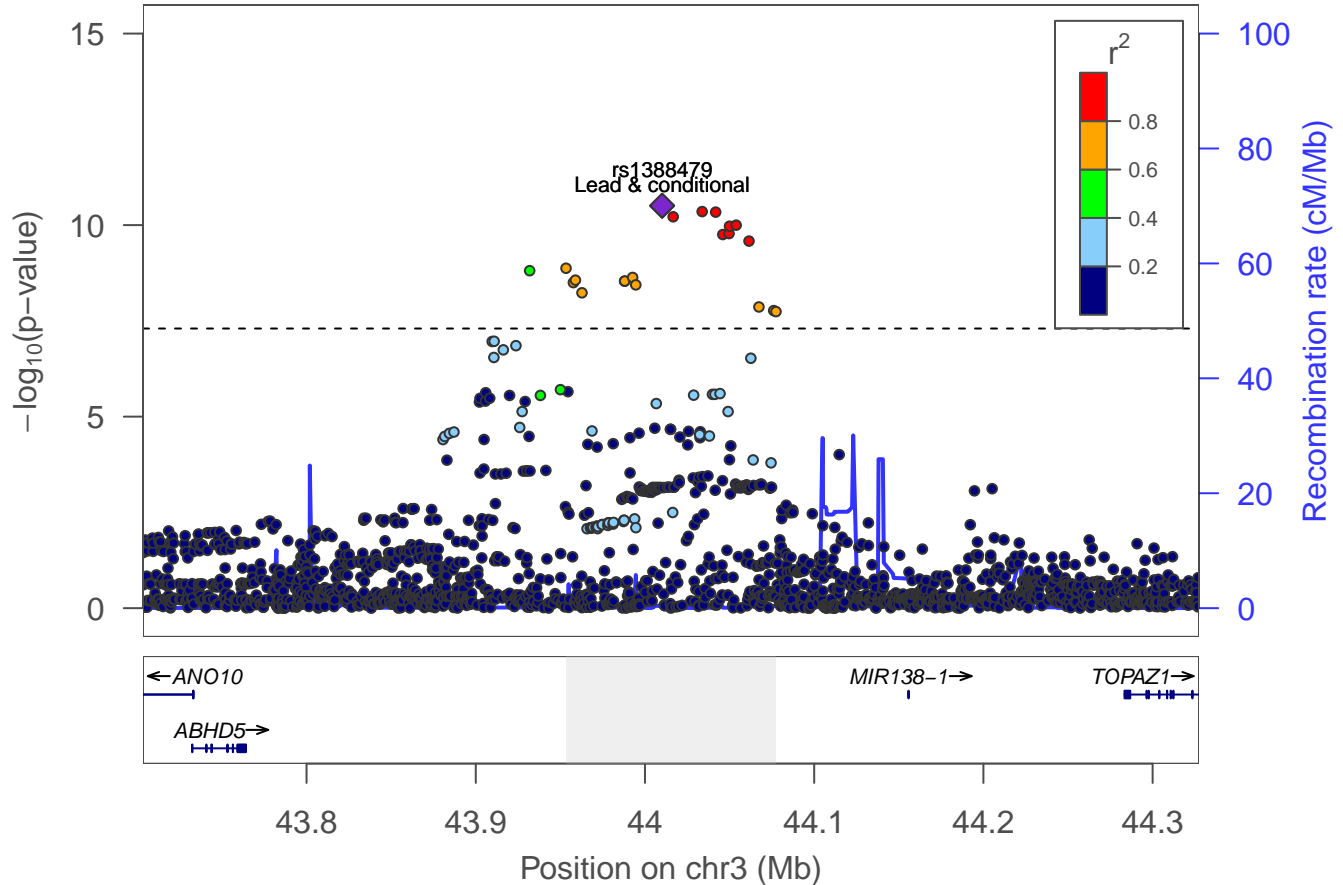

# Adventurousness: locus 32 [chr 3:71.029–71.112Mb]

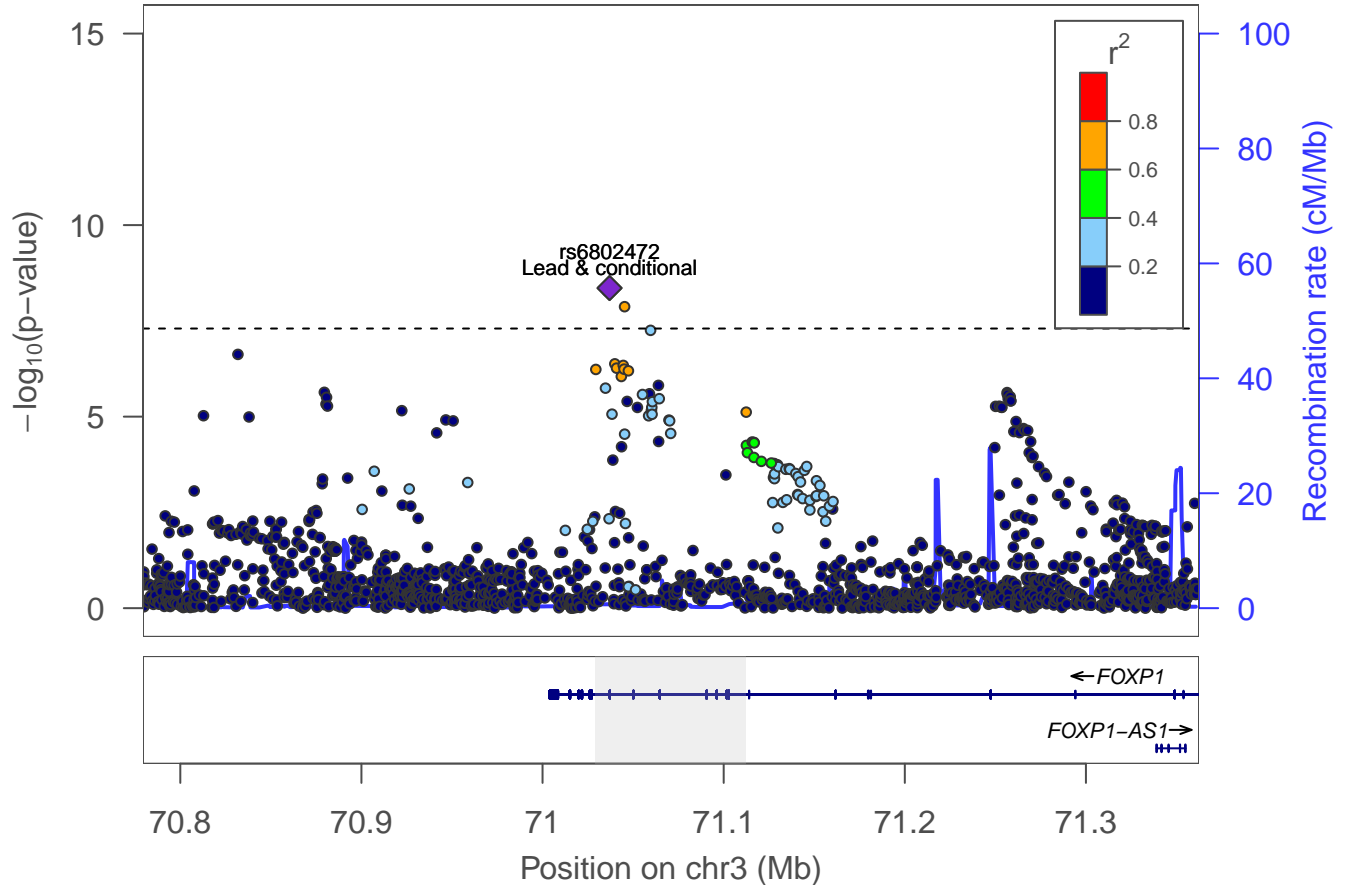

# Adventurousness: locus 33 [chr 3:83.604–83.920Mb]

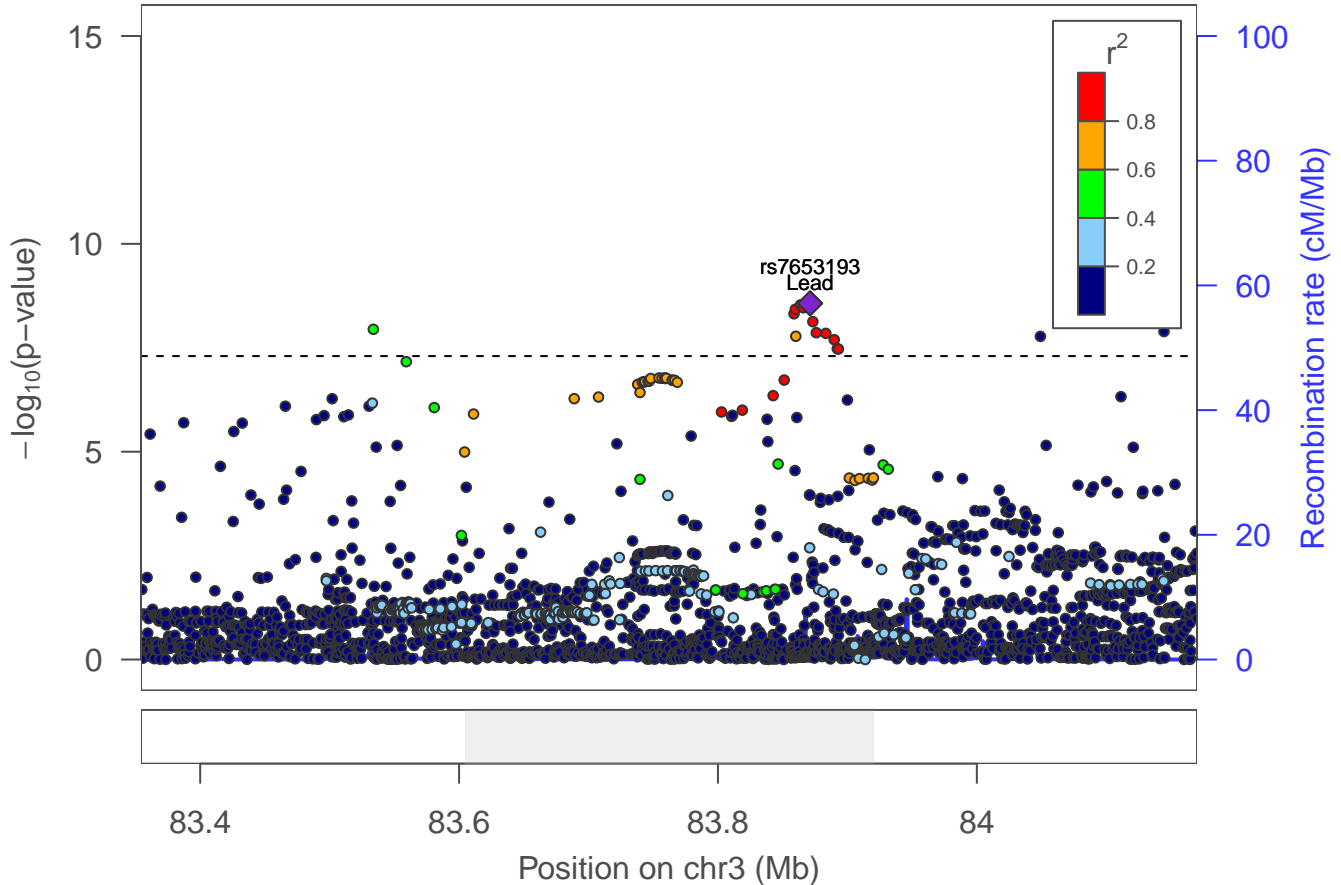



# Adventurousness: Locus 34 [chr 3: 84.853–86.738Mb]

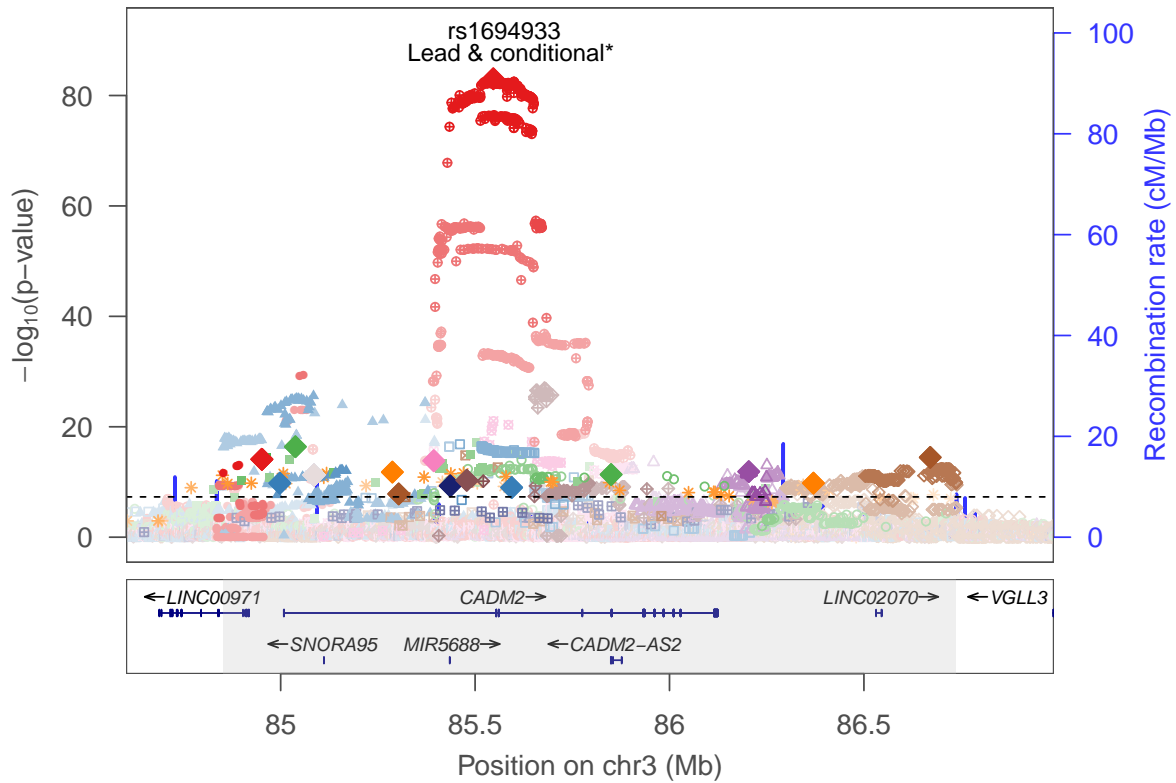

\*All other reference SNPs are Lead SNPs only.

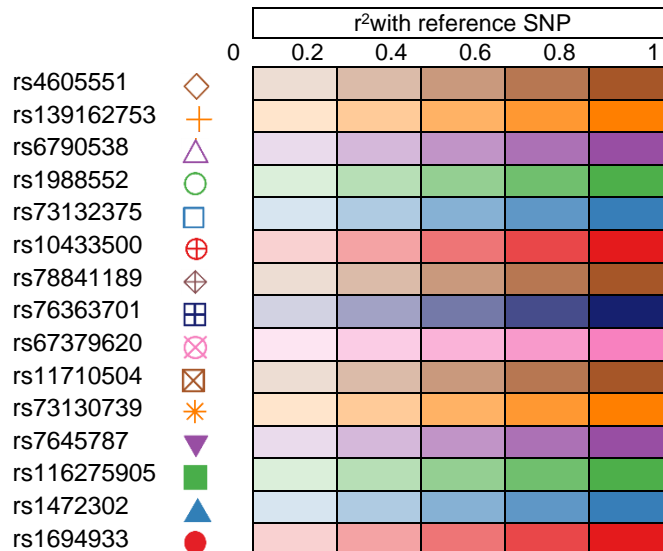

# Adventurousness: Locus 35 [chr 3: 114.134–114.342Mb]

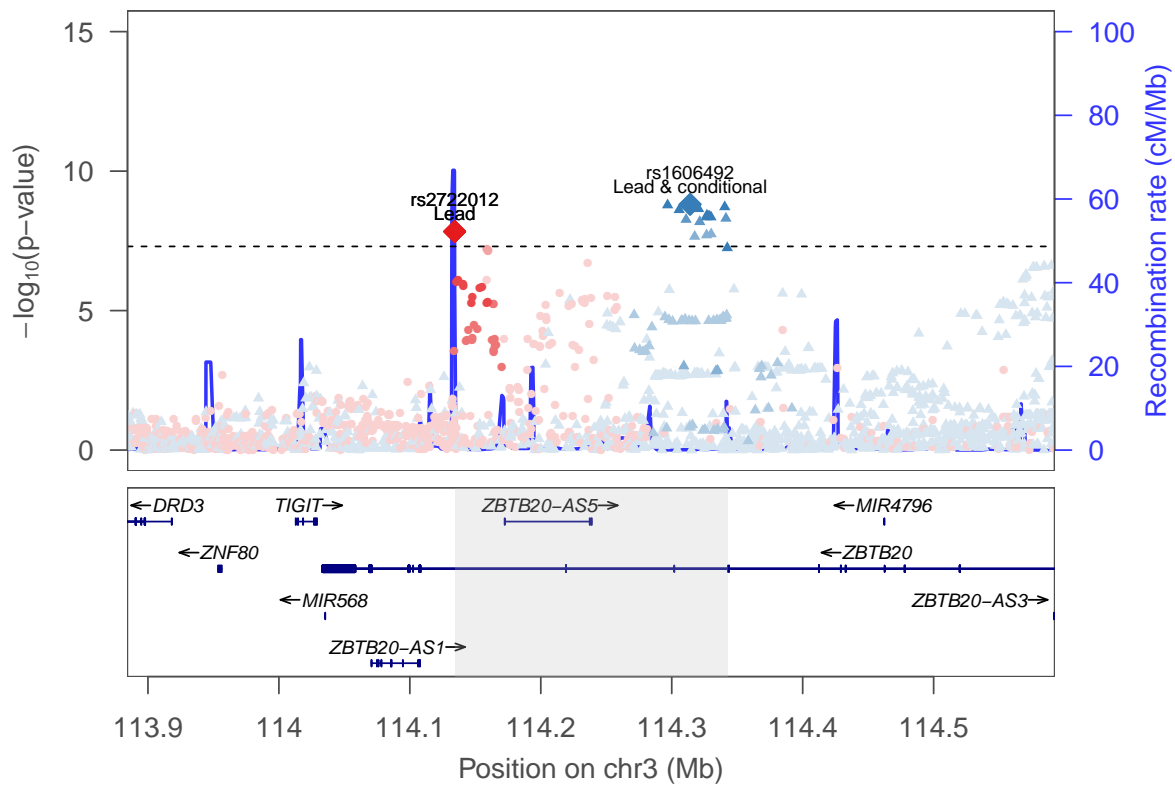

rs1606492 ▲  
rs2722012 ●

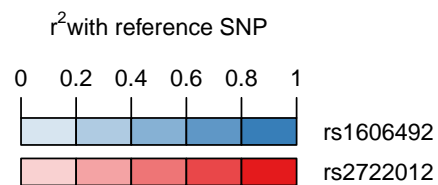

# Adventurousness: locus 36 [chr 3:135.811–136.486Mb]

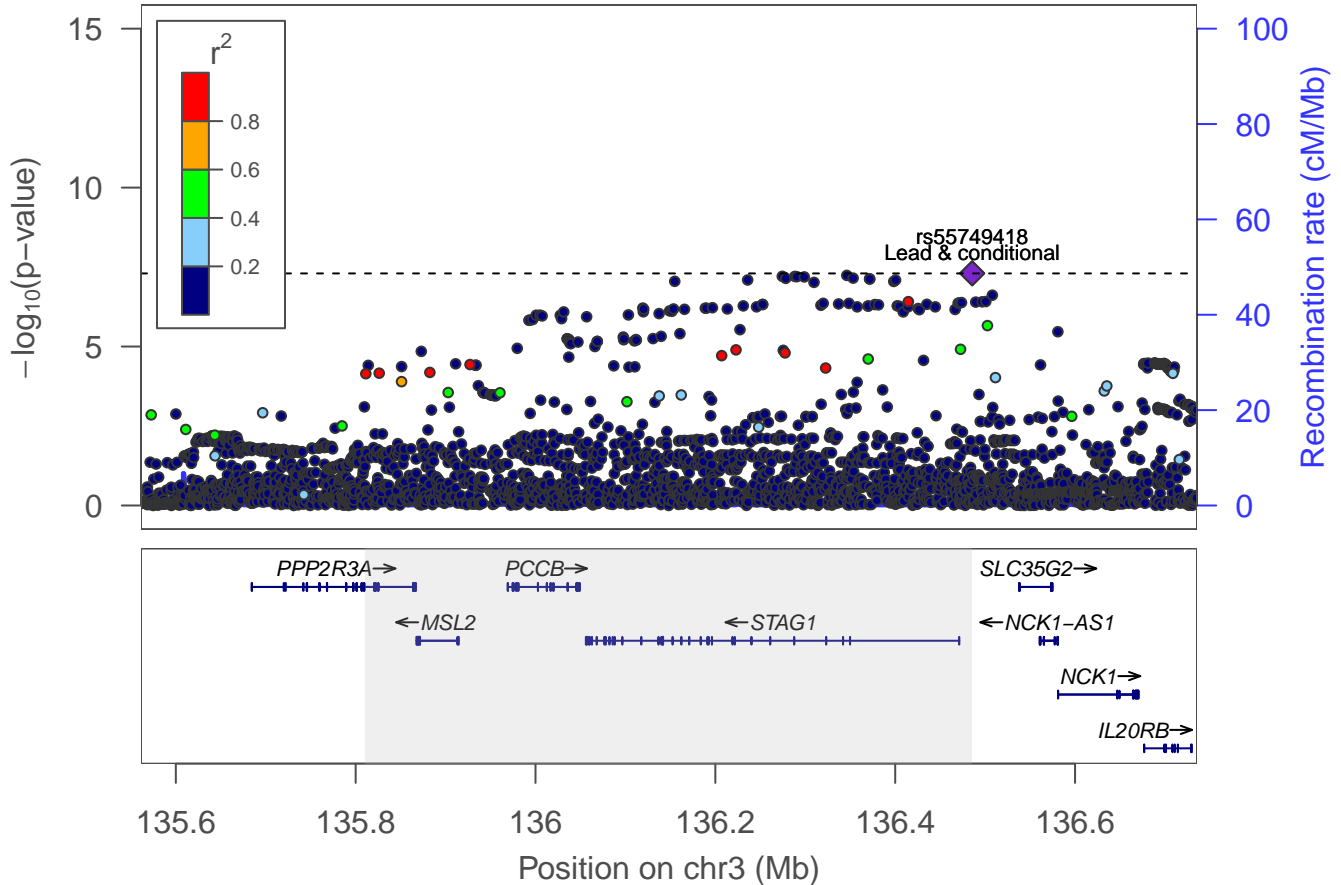

# Adventurousness: locus 37 [chr 3:160.939–161.140Mb]

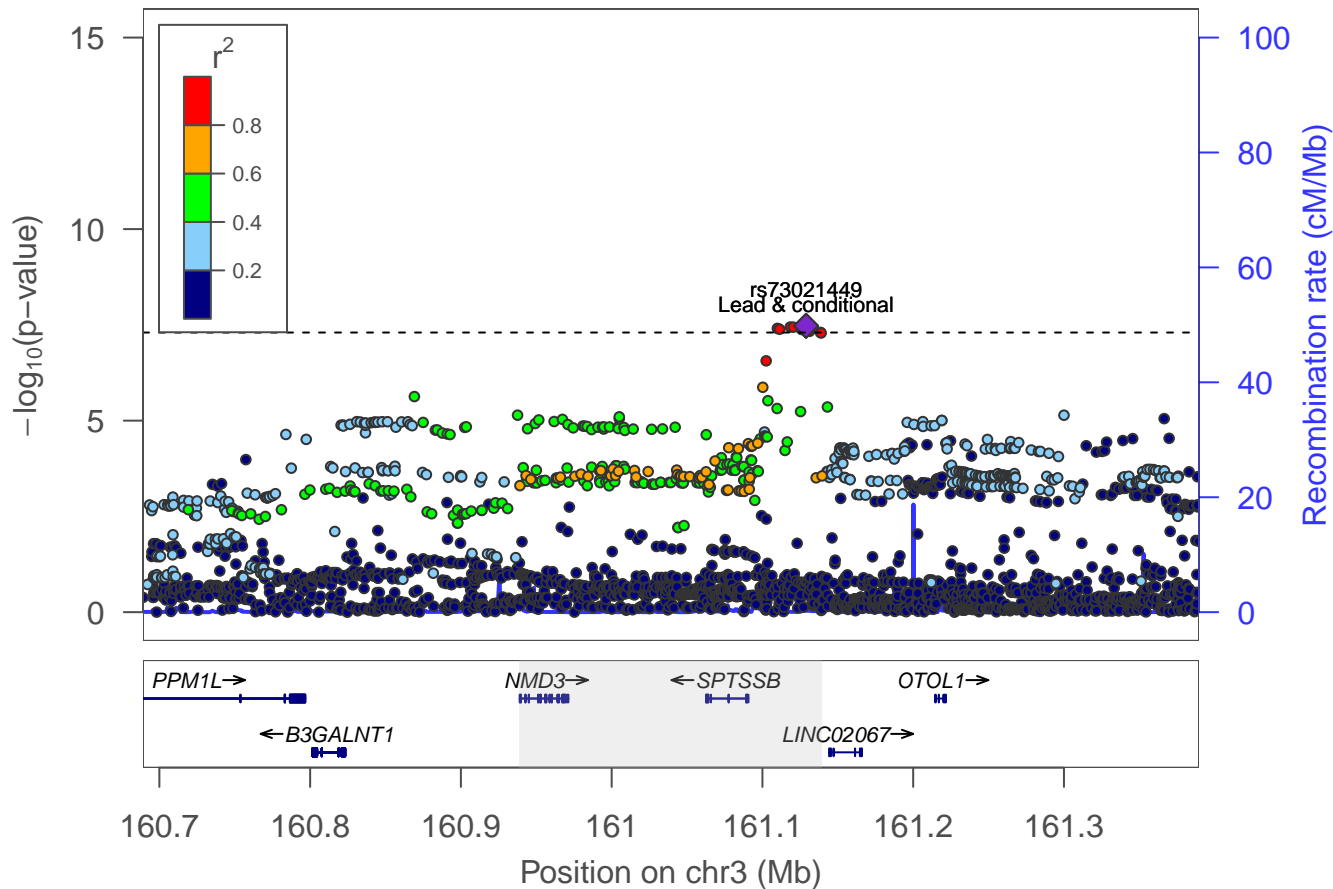

# Adventurousness: locus 38 [chr 3:173.633–173.752Mb]

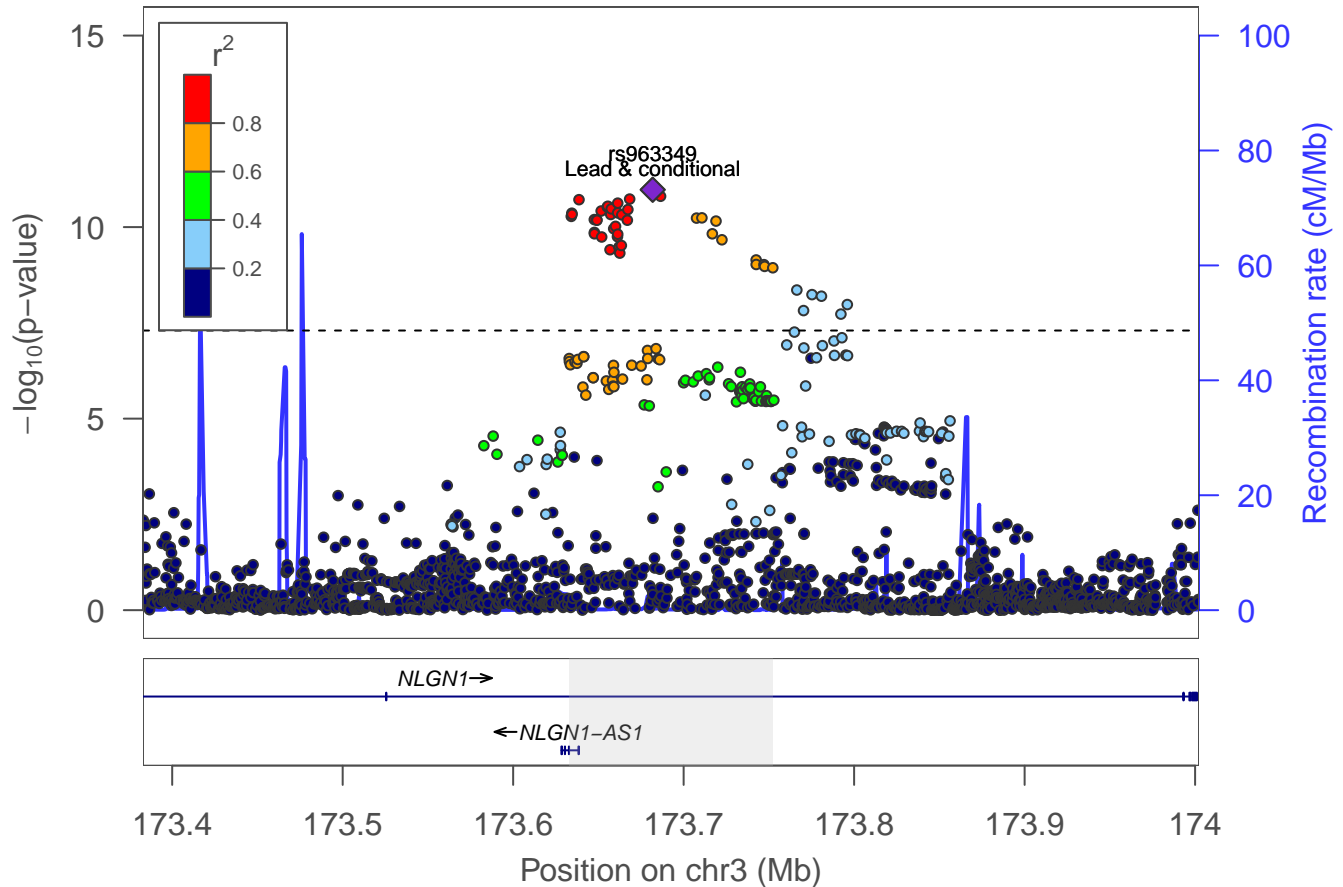

# Adventurousness: Locus 39 [chr 4: 30.809–31.205Mb]

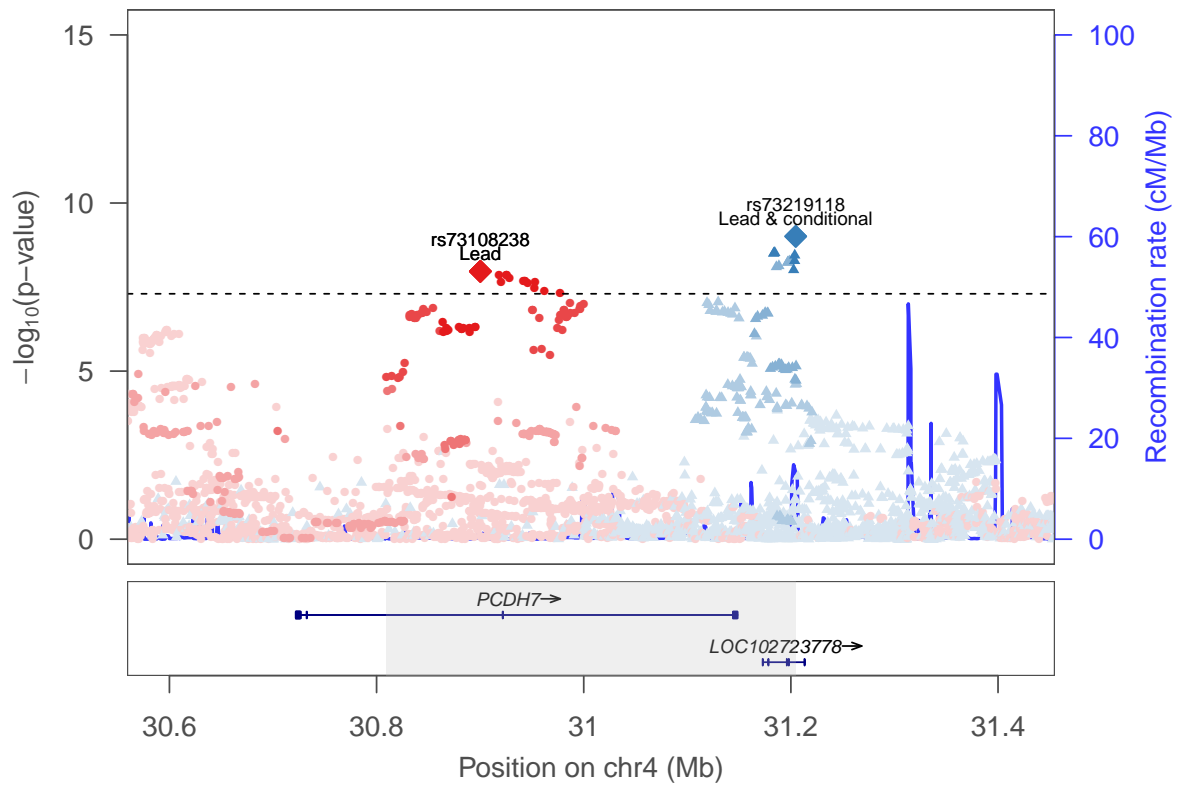

rs73219118 ▲  
rs73108238 ●

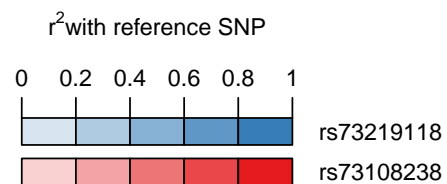

# Adventurousness: locus 40 [chr 4:46.191–46.362Mb]

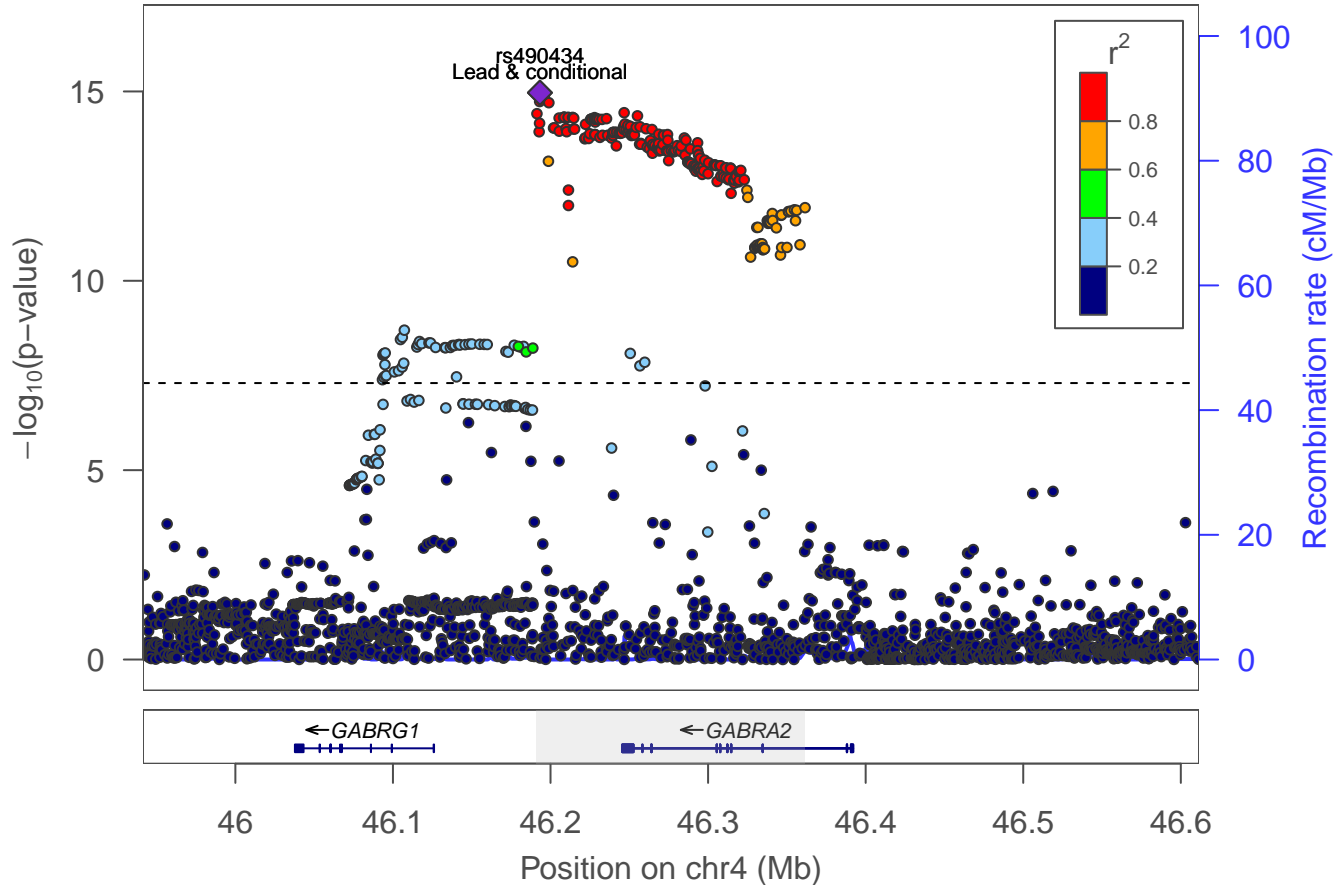

# Adventurousness: locus 41 [chr 4:47.014–47.055Mb]

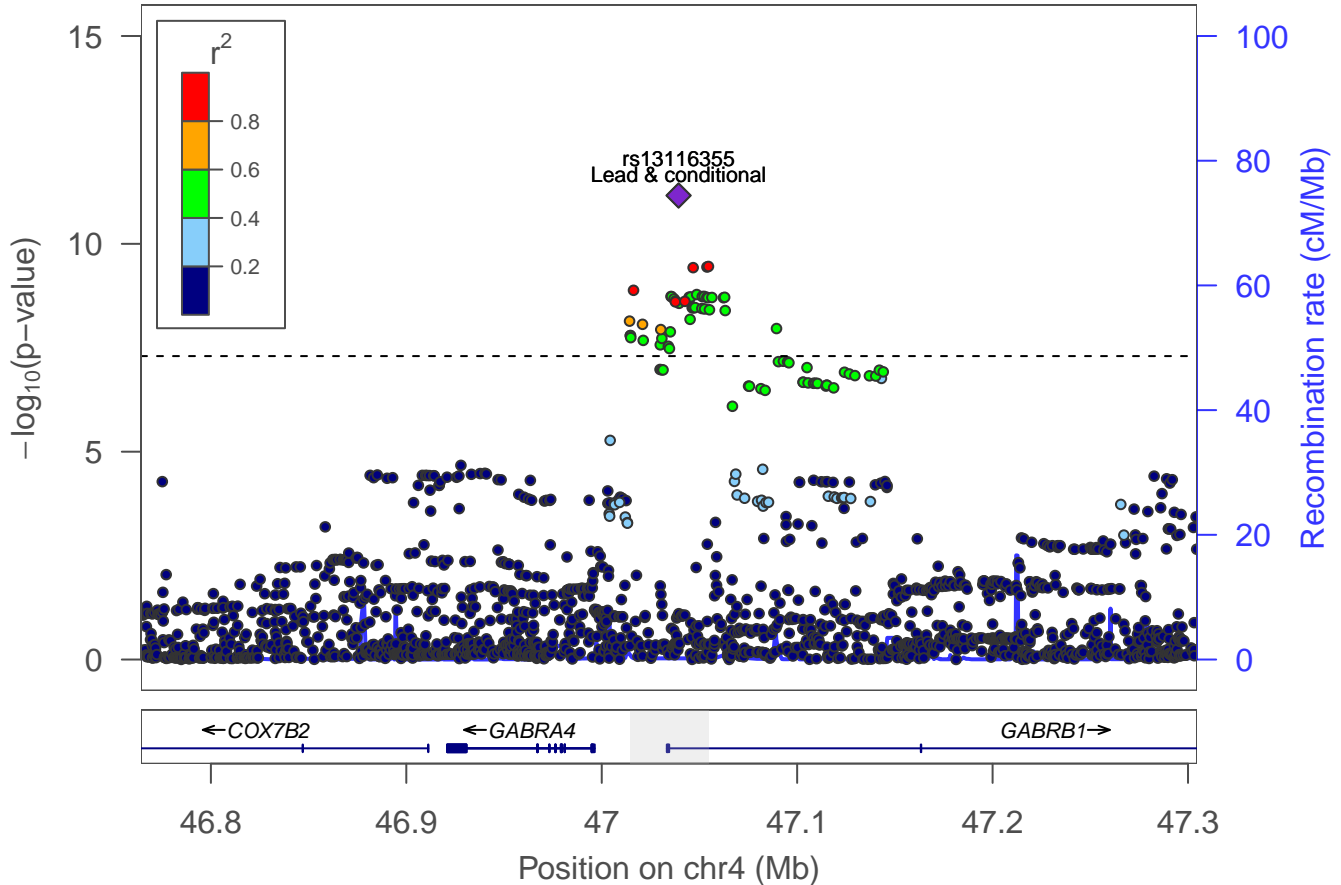



# Adventurousness: locus 42 [chr 4:57.718–57.893Mb]

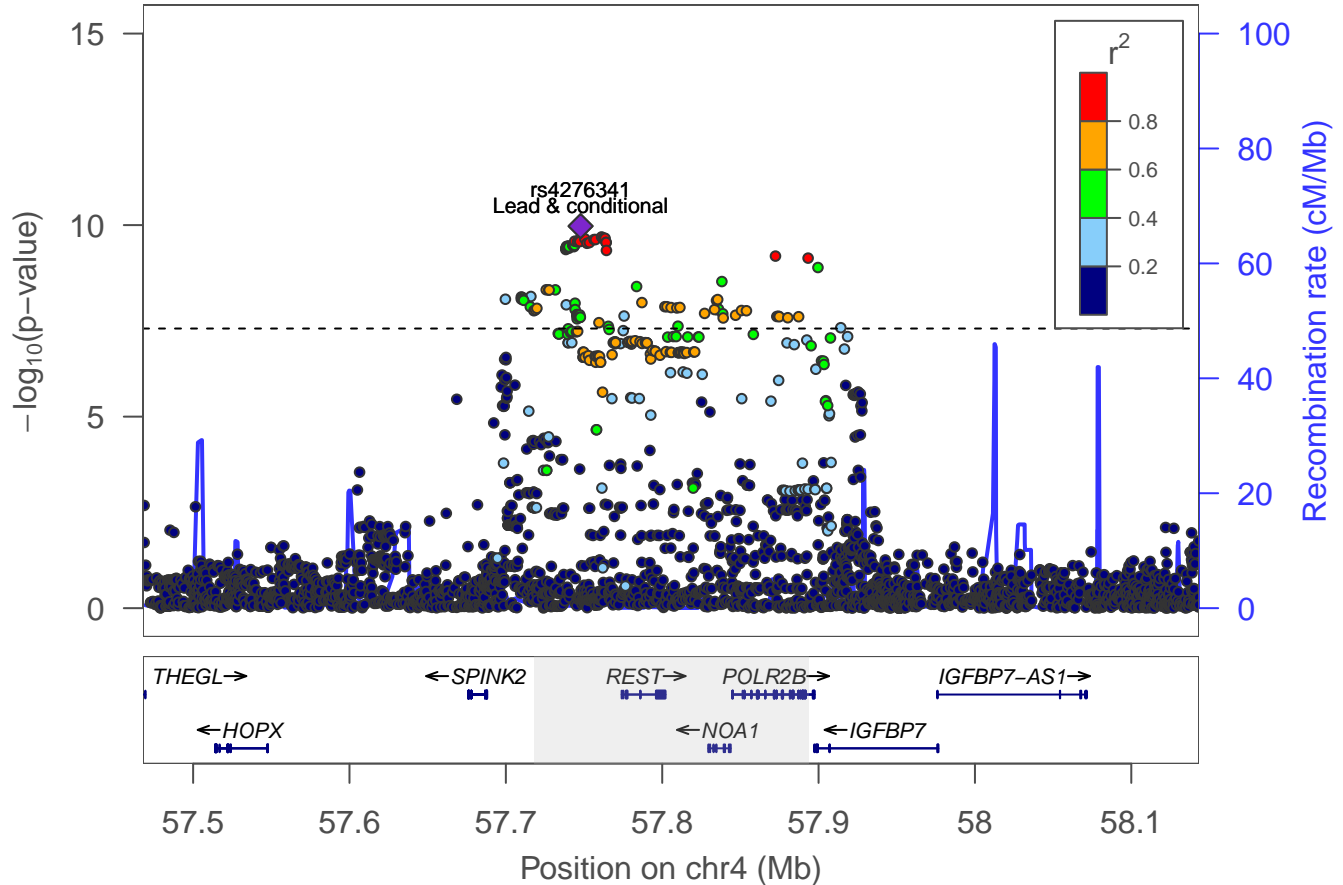

# Adventurousness: locus 43 [chr 4:62.744–62.754Mb]

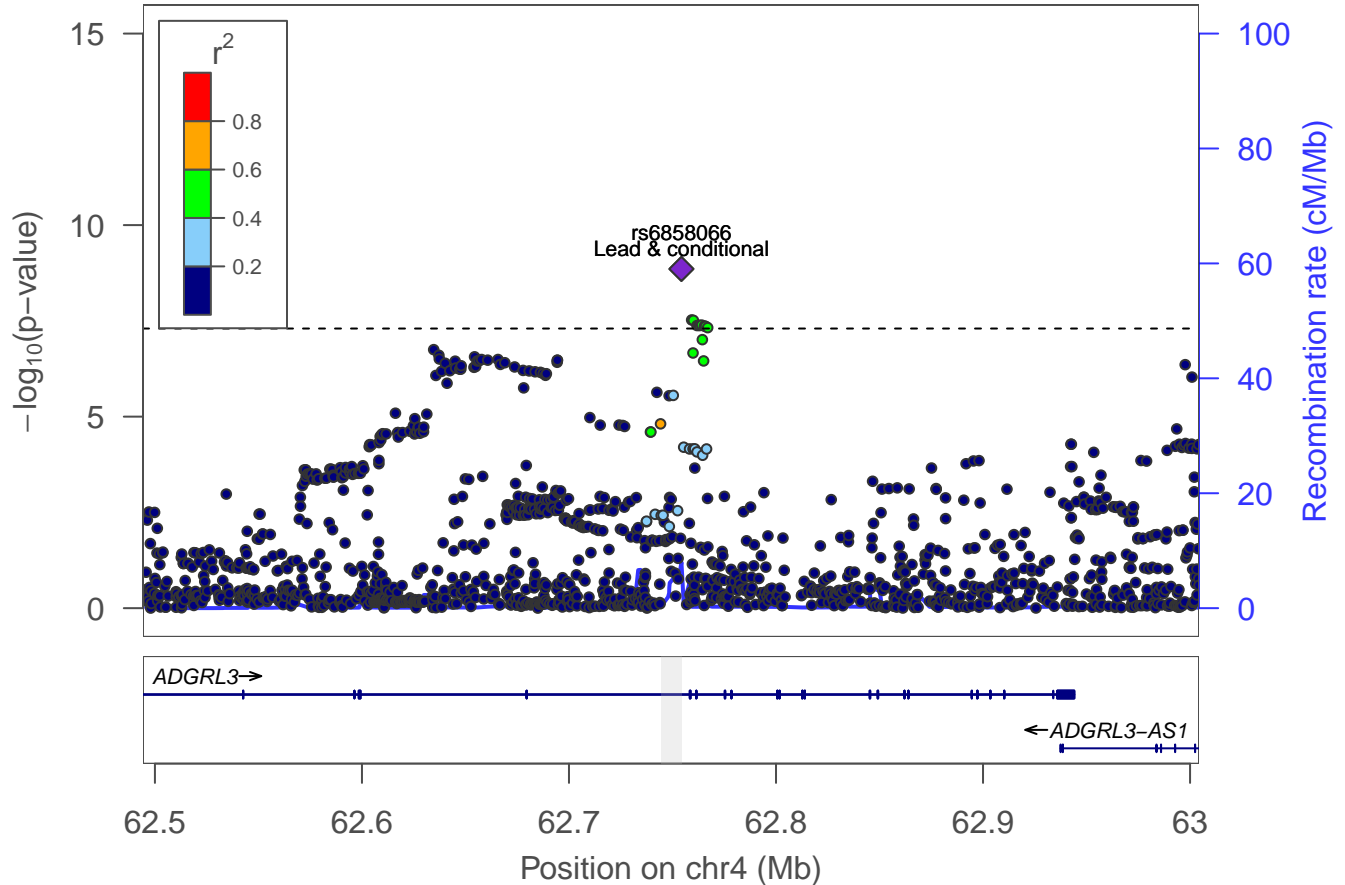

# Adventurousness: locus 44 [chr 4:98.055–98.278Mb]

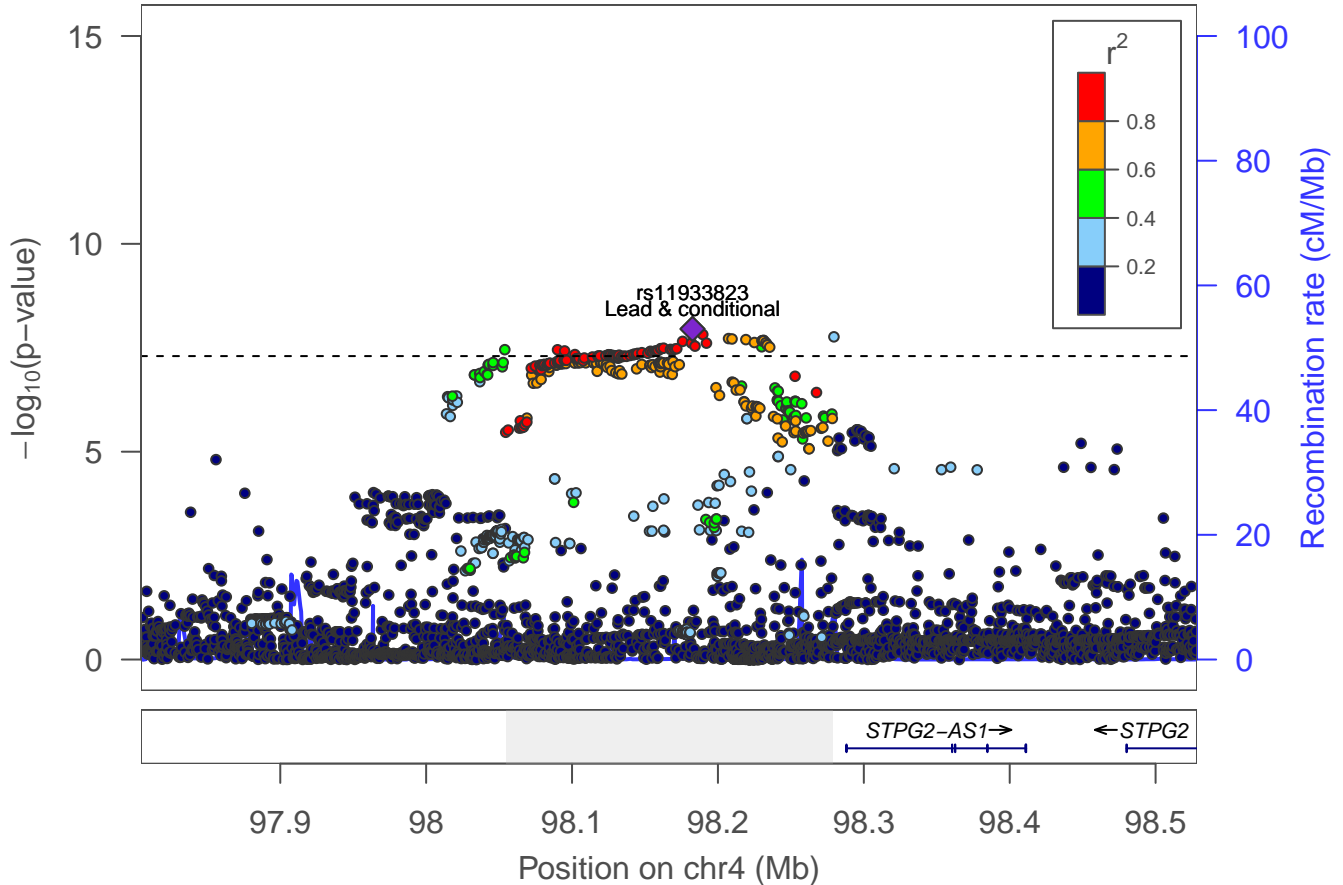

# Adventurousness: Locus 45 [chr 4: 102.770–103.283Mb]

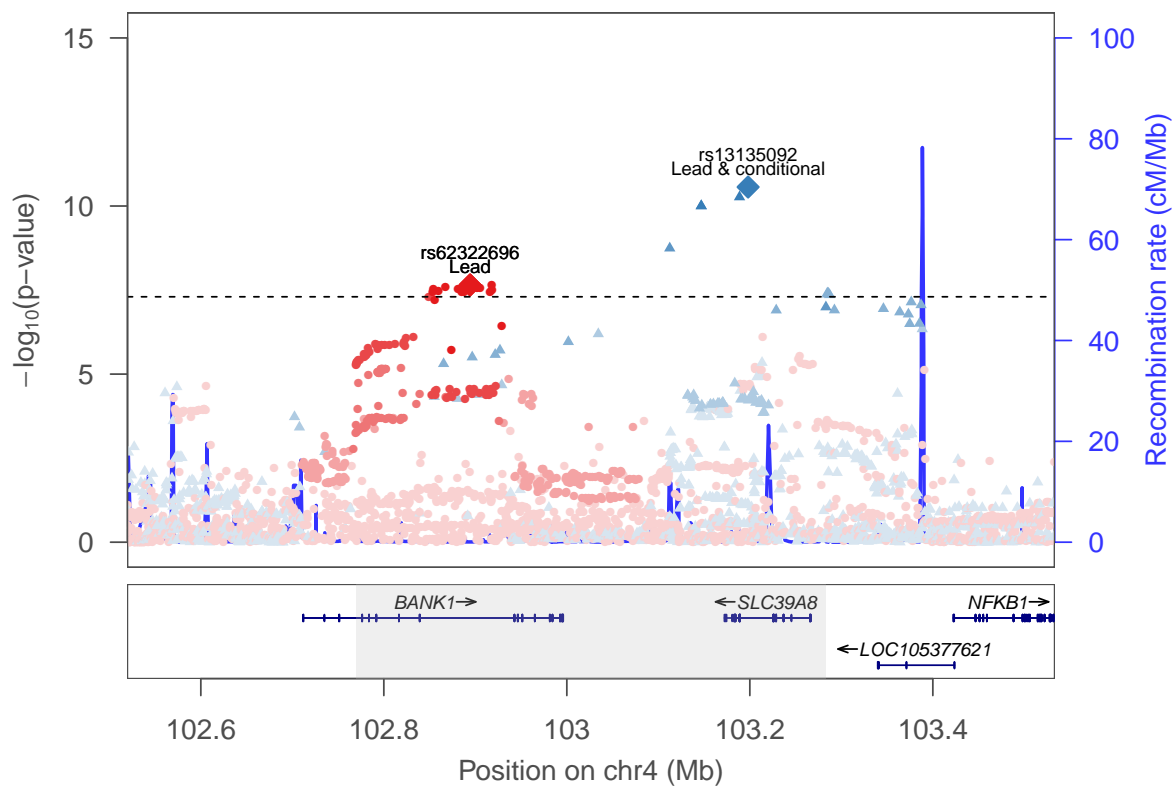

rs13135092 ▲  
rs62322696 ●

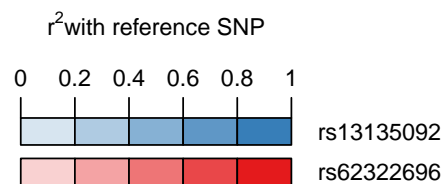

# Adventurousness: locus 46 [chr 4:106.049–106.265Mb]

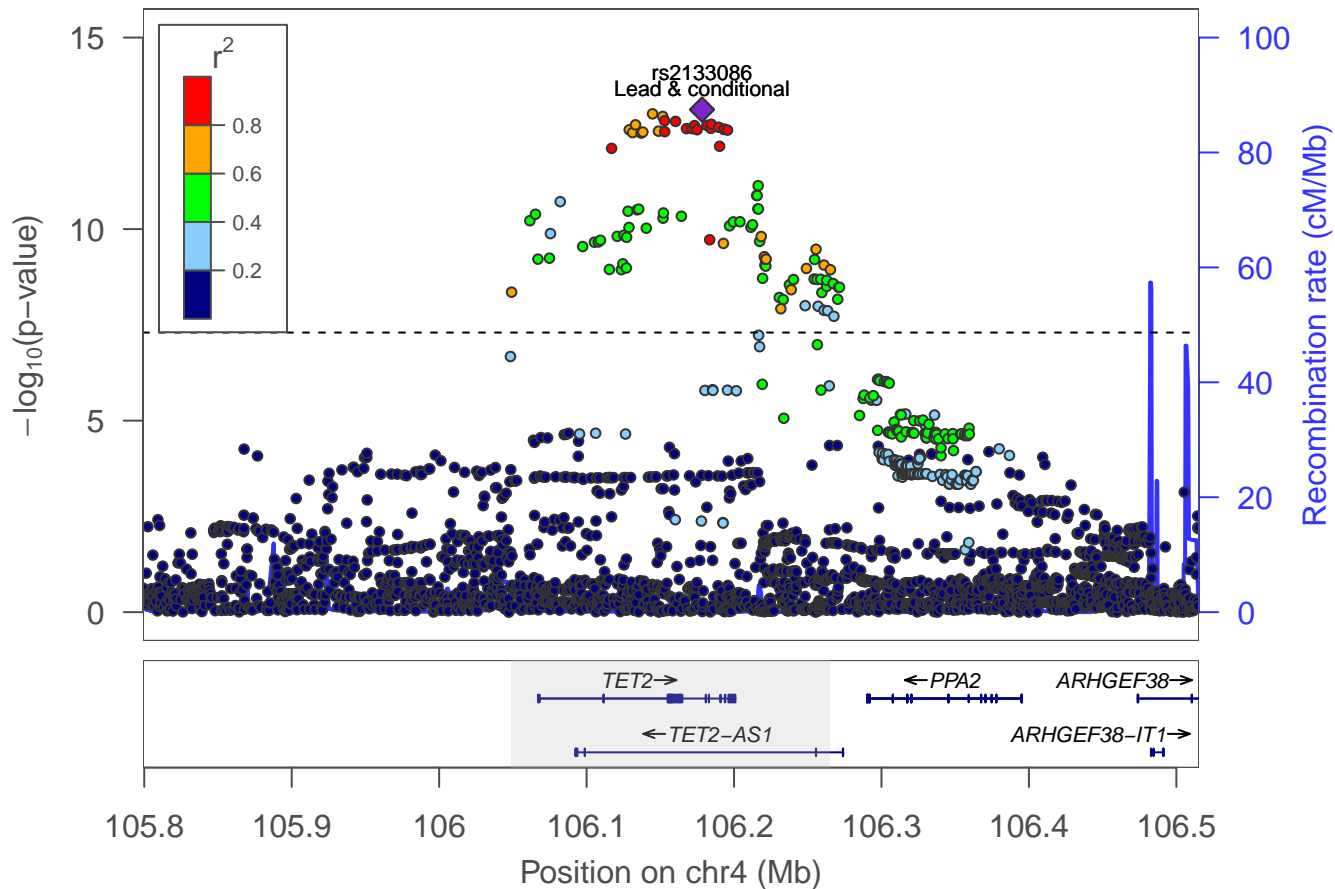

# Adventurousness: locus 47 [chr 4:143.617–143.785Mb]

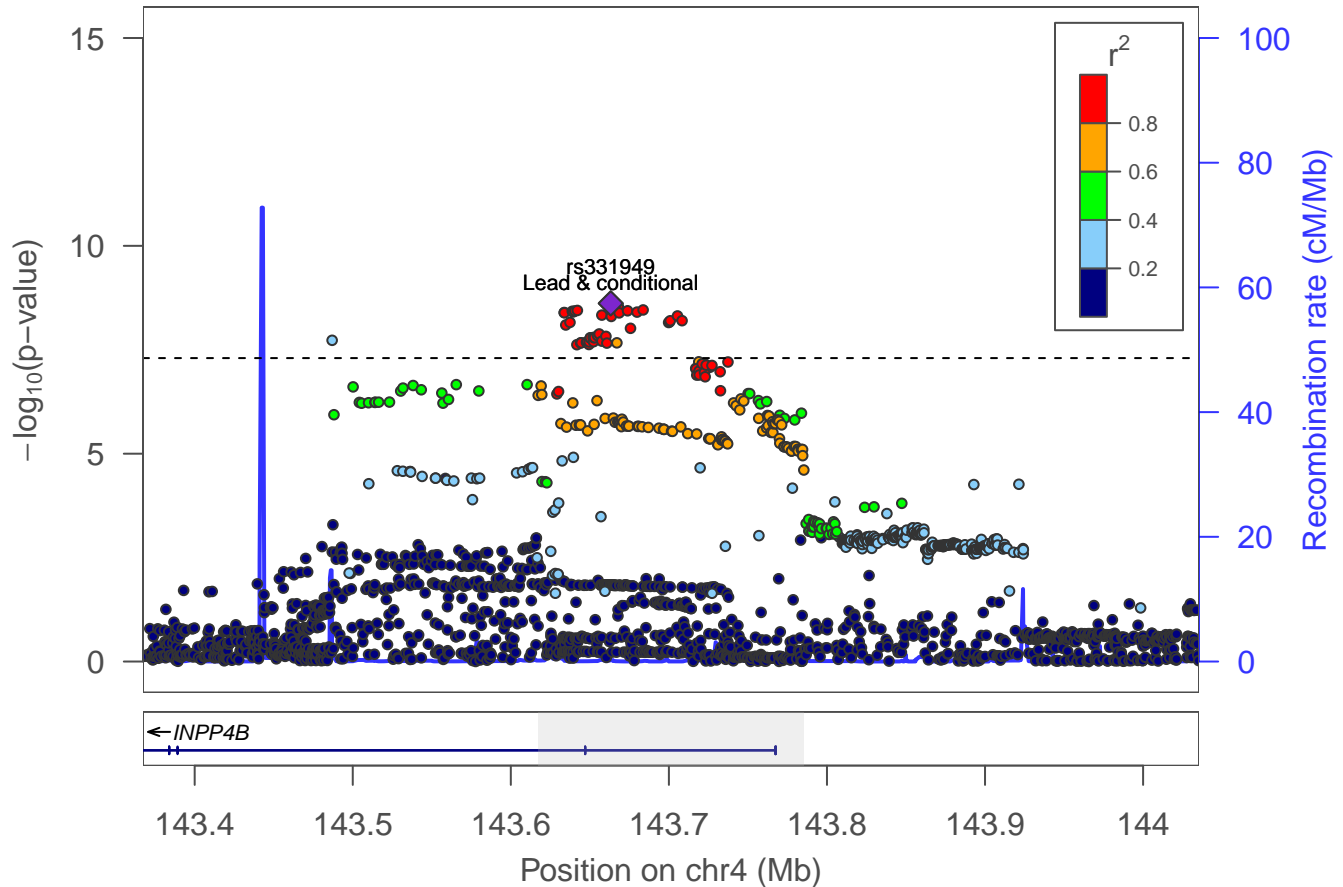

# Adventurousness: locus 48 [chr 5:26.013–26.071Mb]

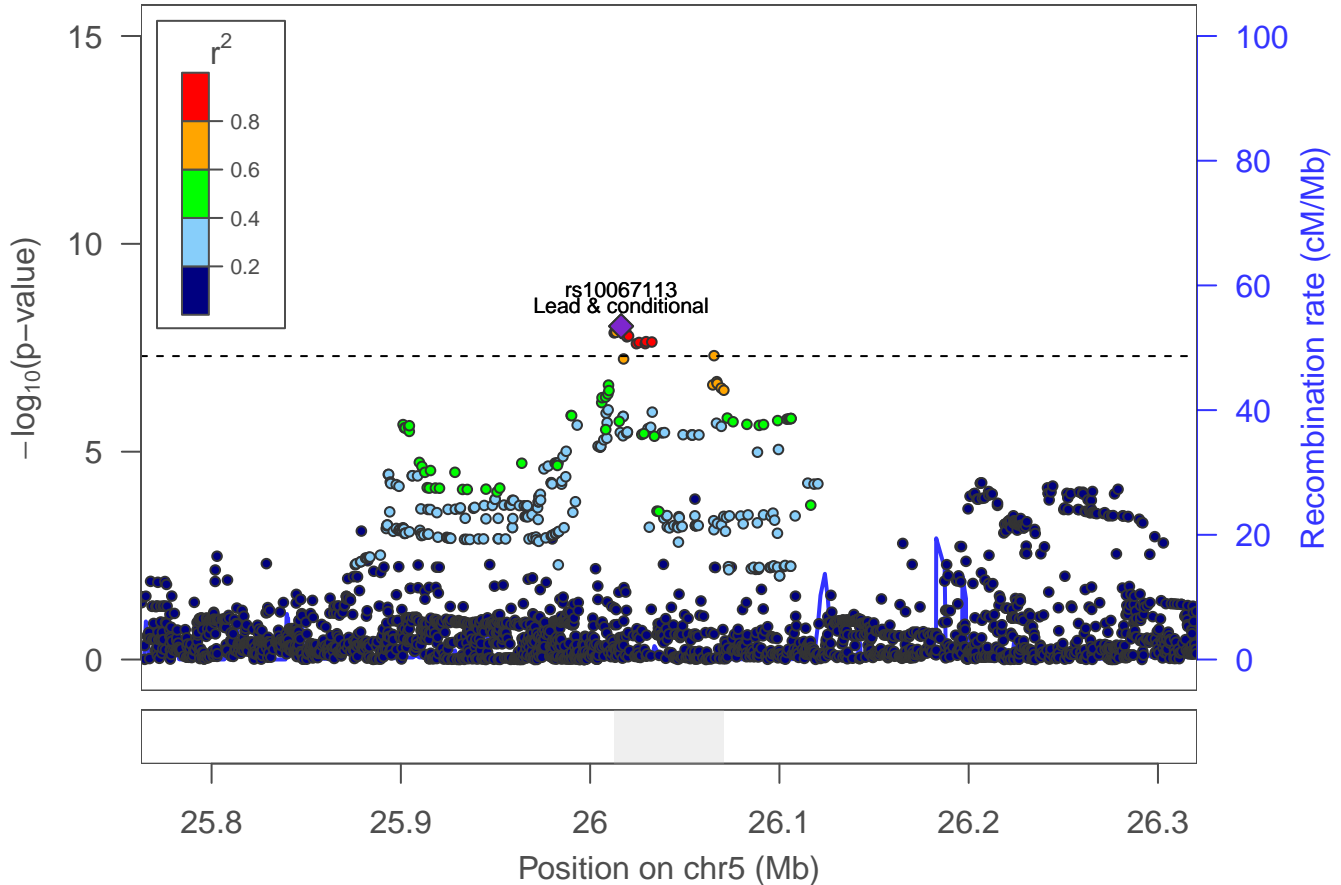

# Adventurousness: locus 49 [chr 5:29.979–30.114Mb]

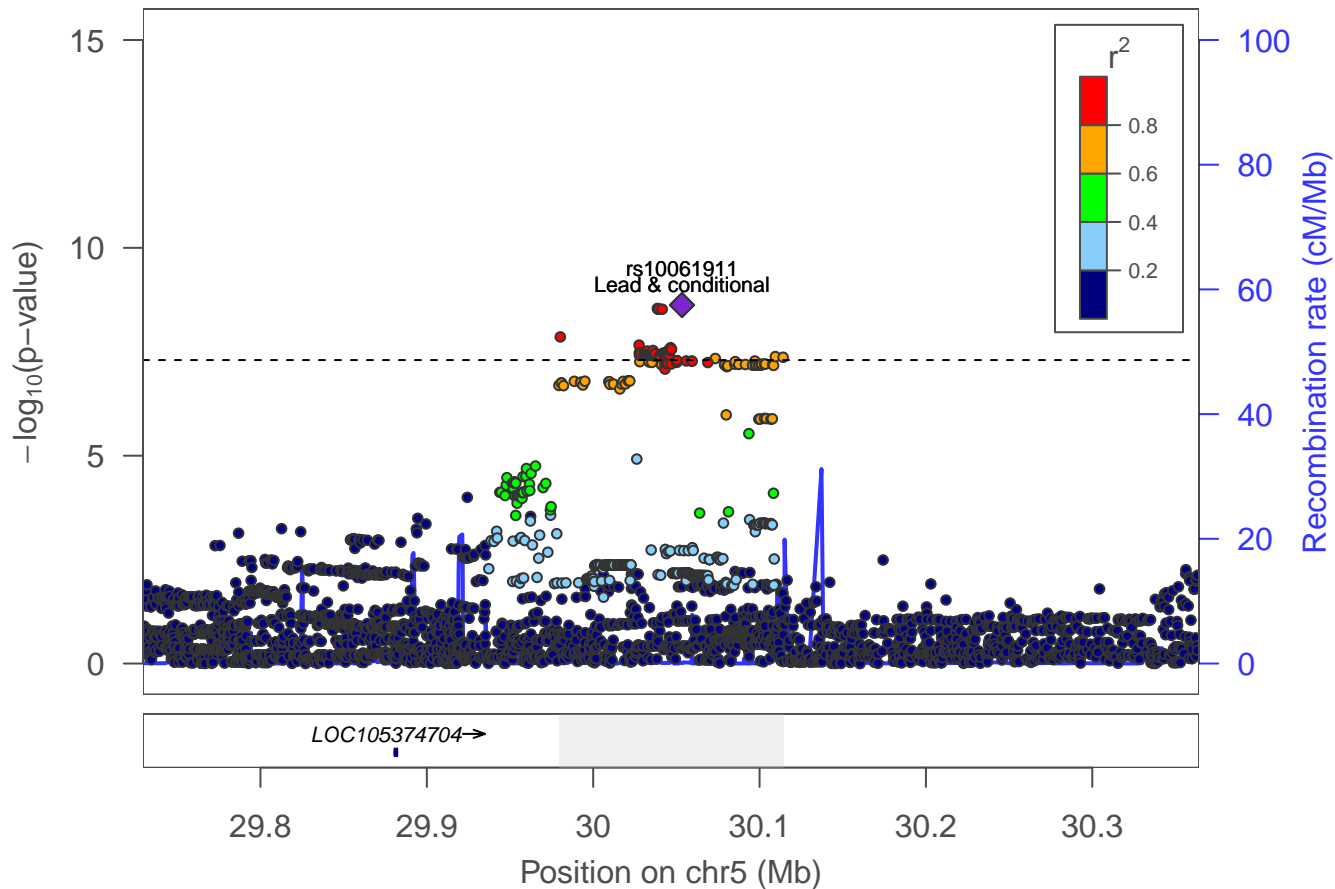



# Adventurousness: locus 50 [chr 5:45.507–46.219Mb]

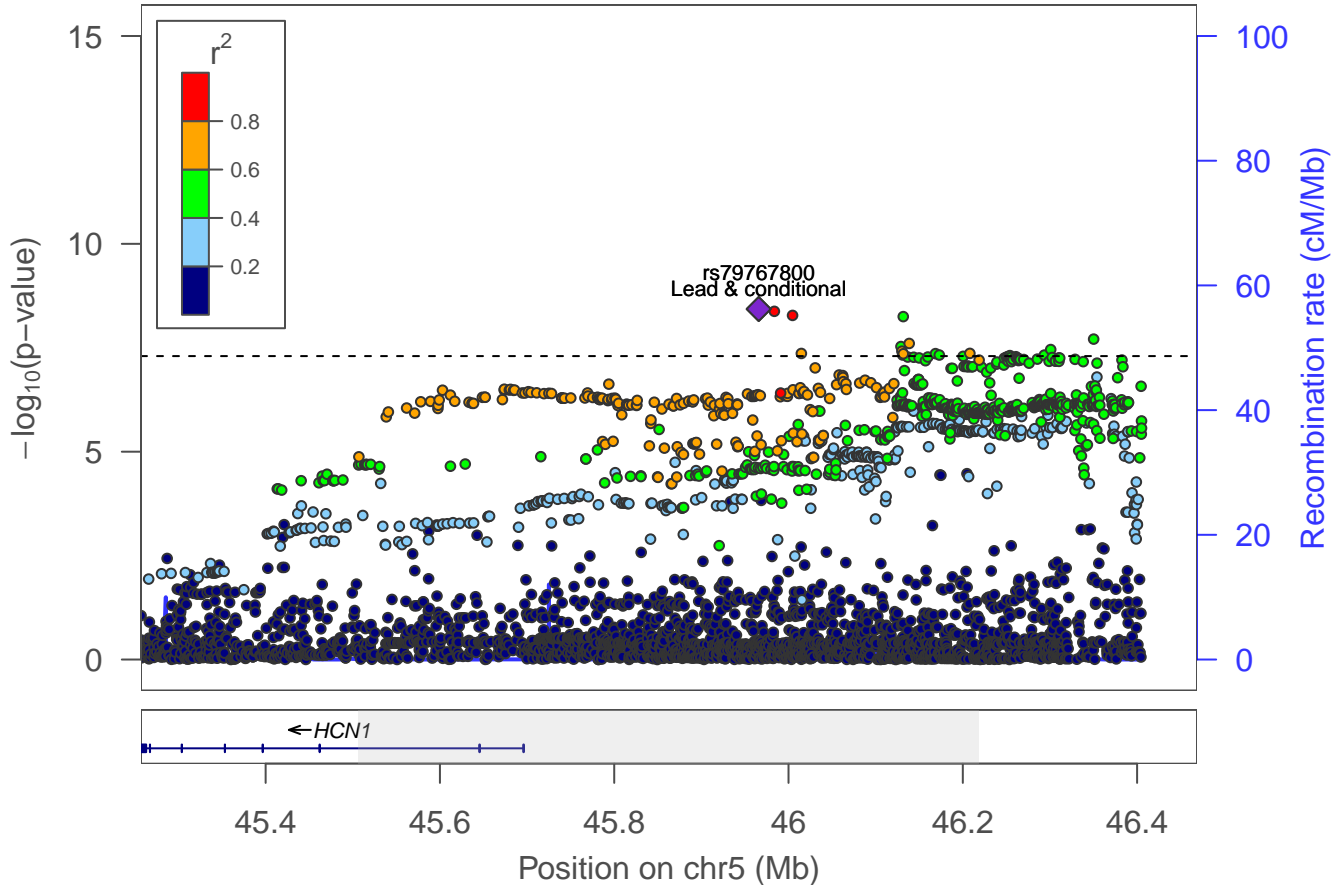

# Adventurousness: locus 51 [chr 5:61.543–61.953Mb]

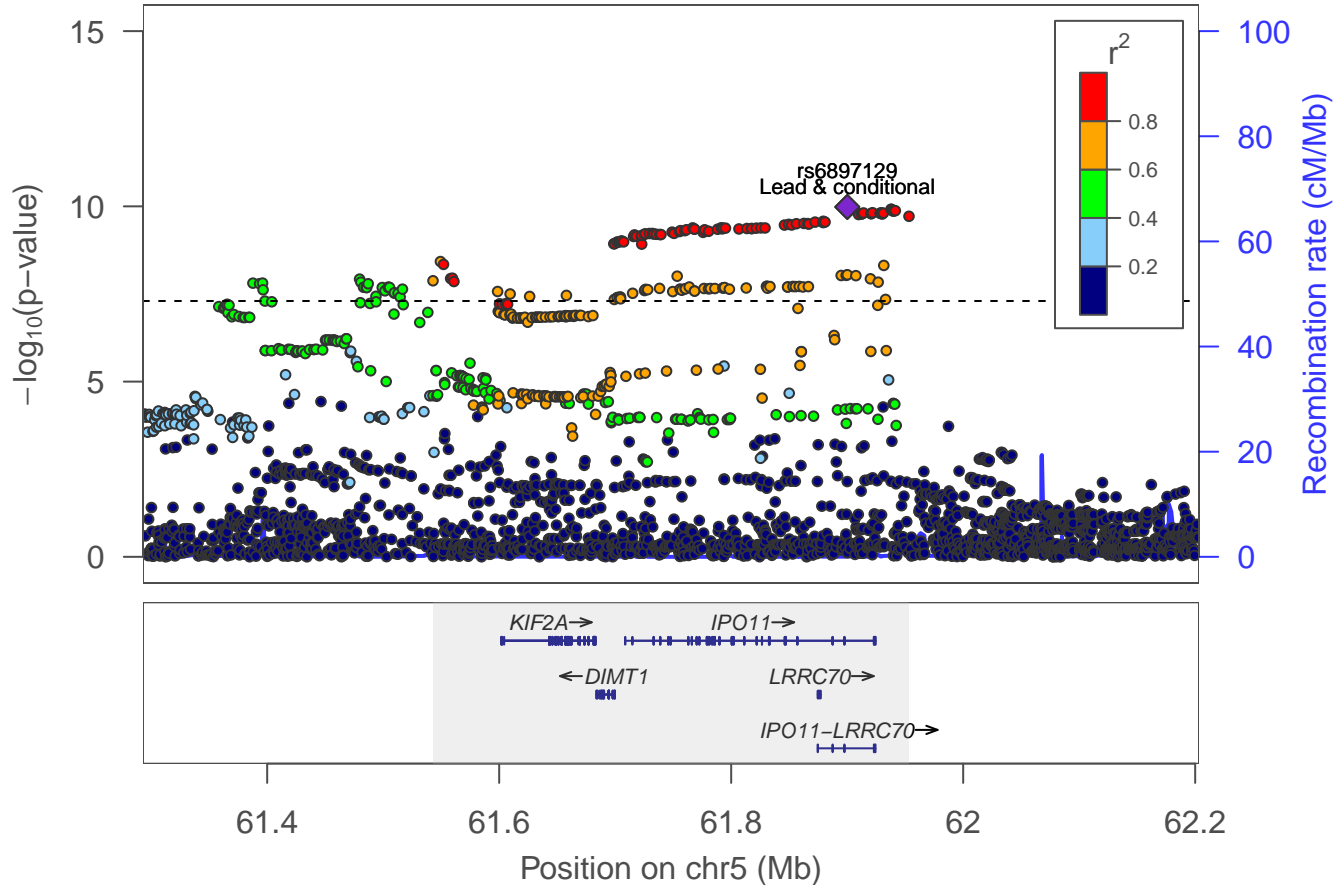

# Adventurousness: Locus 52 [chr 5: 80.240–80.364Mb]

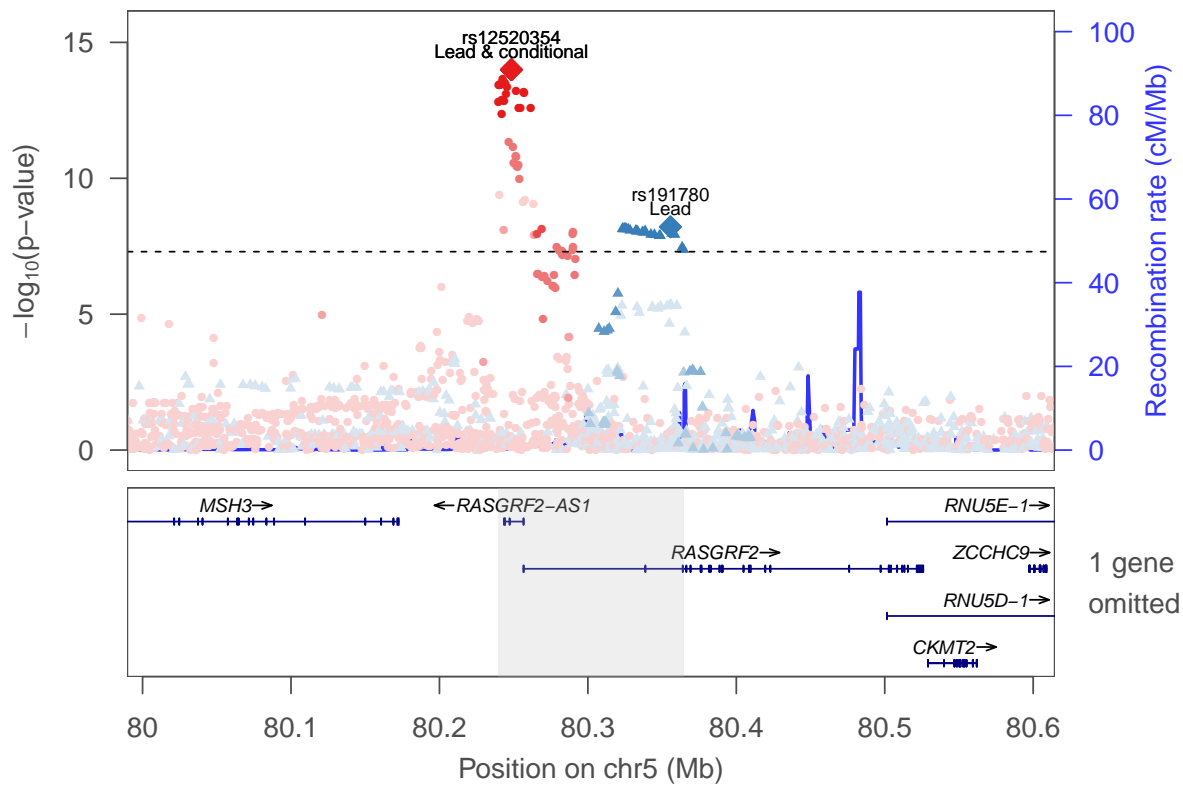

rs191780 ▲  
rs12520354 ●

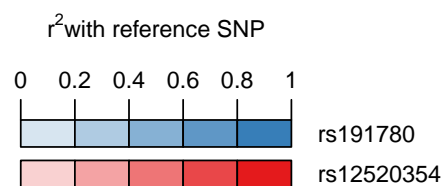

# Adventurousness: locus 53 [chr 5:81.183–81.247Mb]

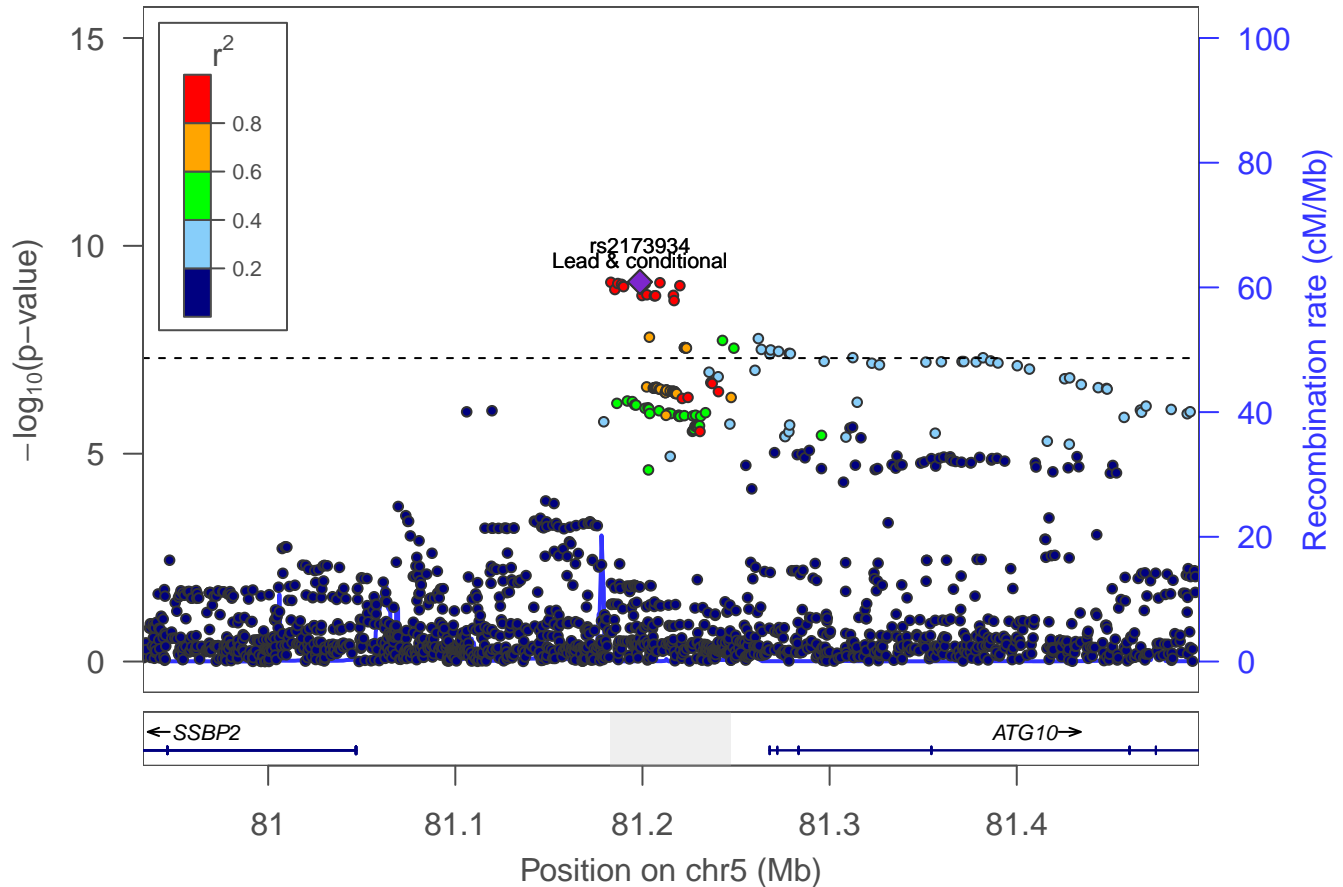

# Adventurousness: locus 54 [chr 5:102.596–102.686Mb]

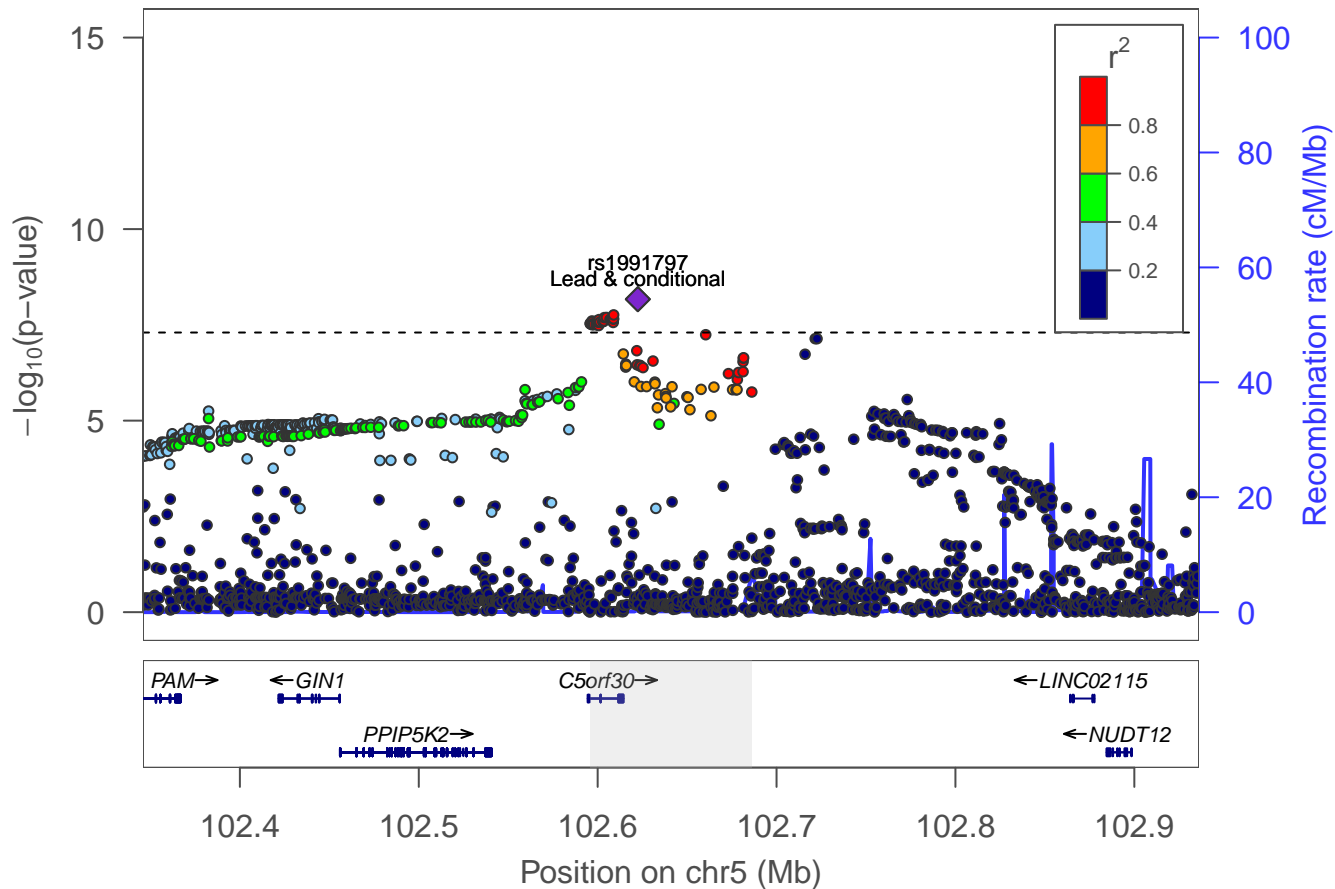

# Adventurousness: locus 55 [chr 5:123.847–123.864Mb]

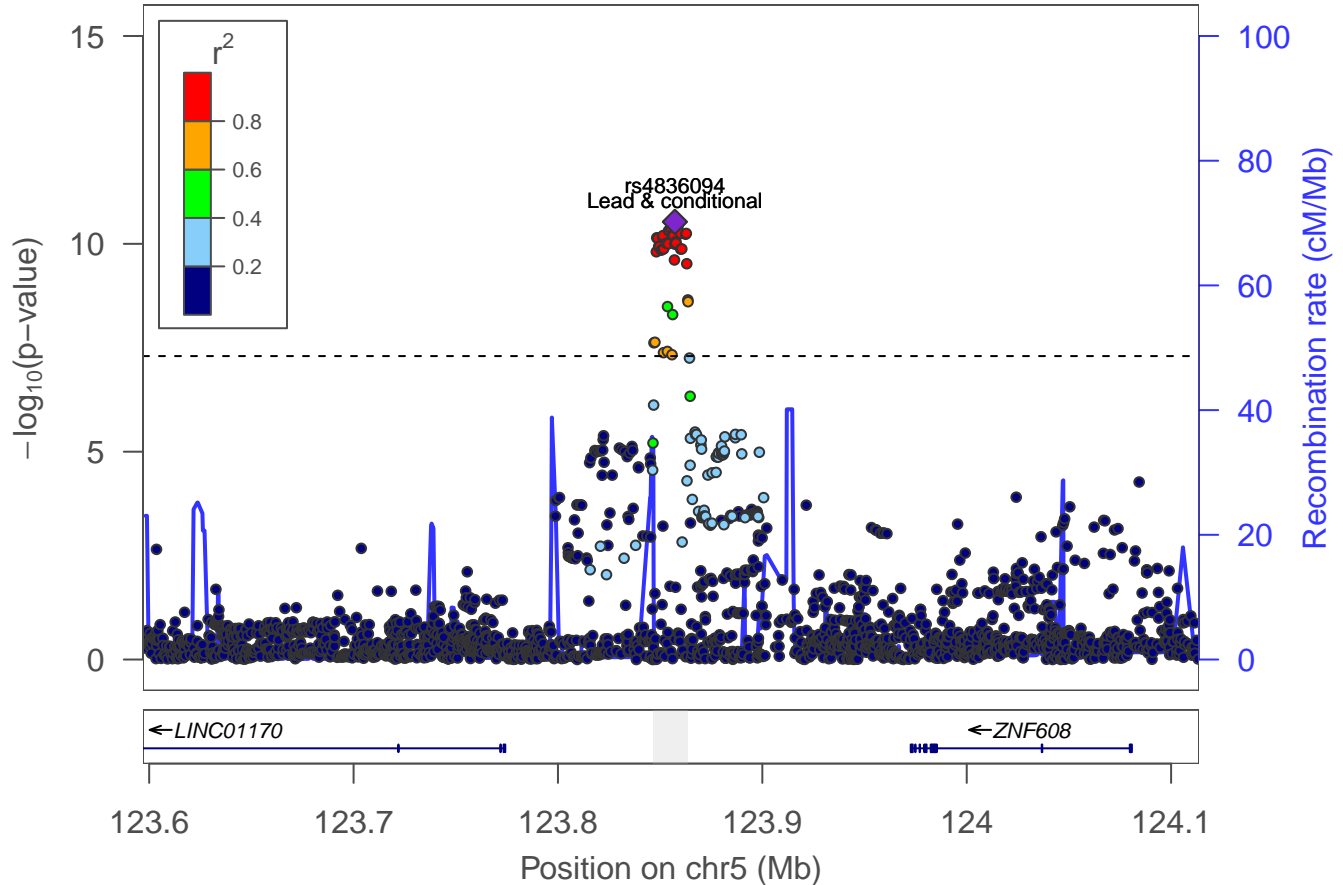

# Adventurousness: locus 56 [chr 5:158.113–158.364Mb]

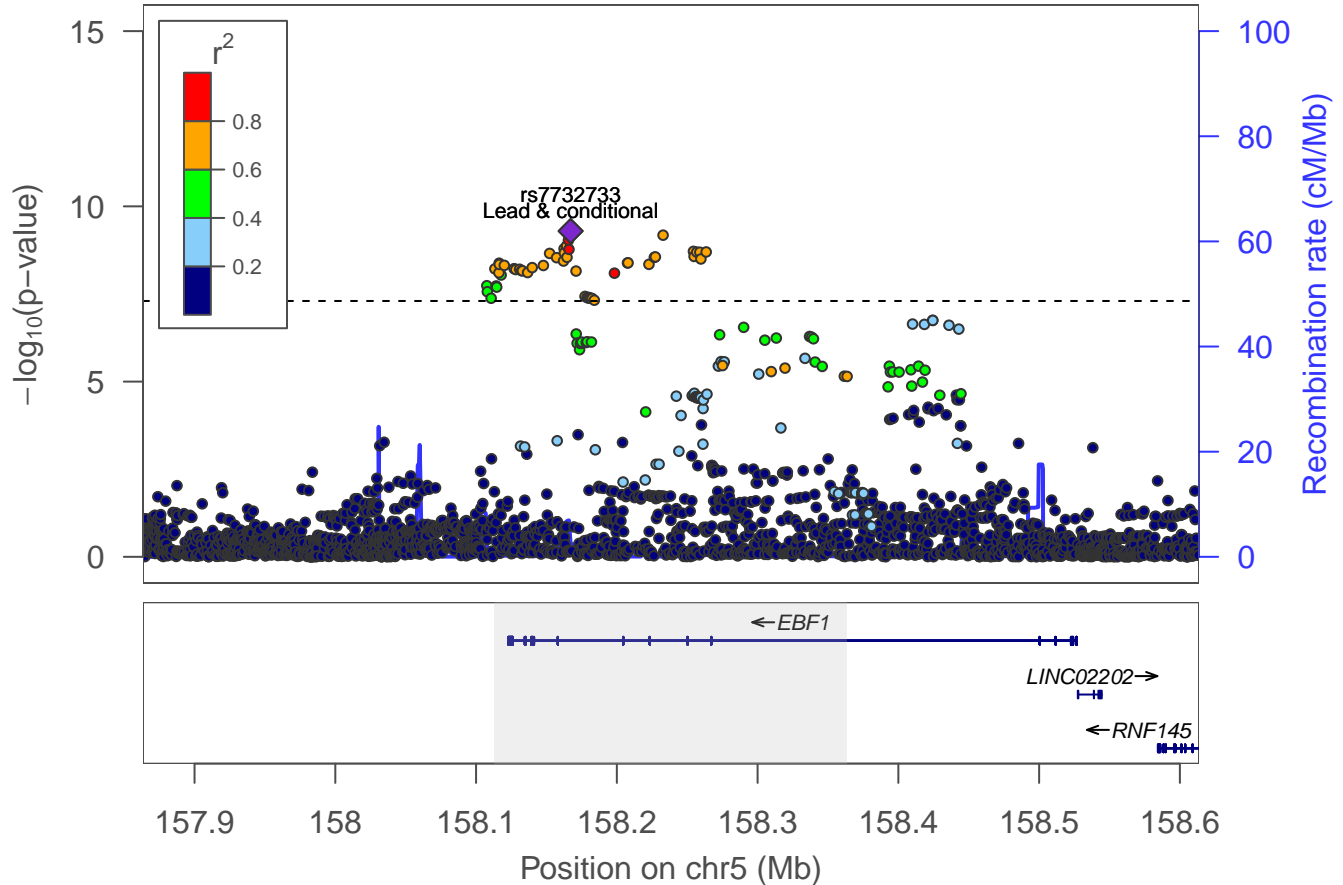

# Adventurousness: locus 57 [chr 6:29.116–29.341Mb]

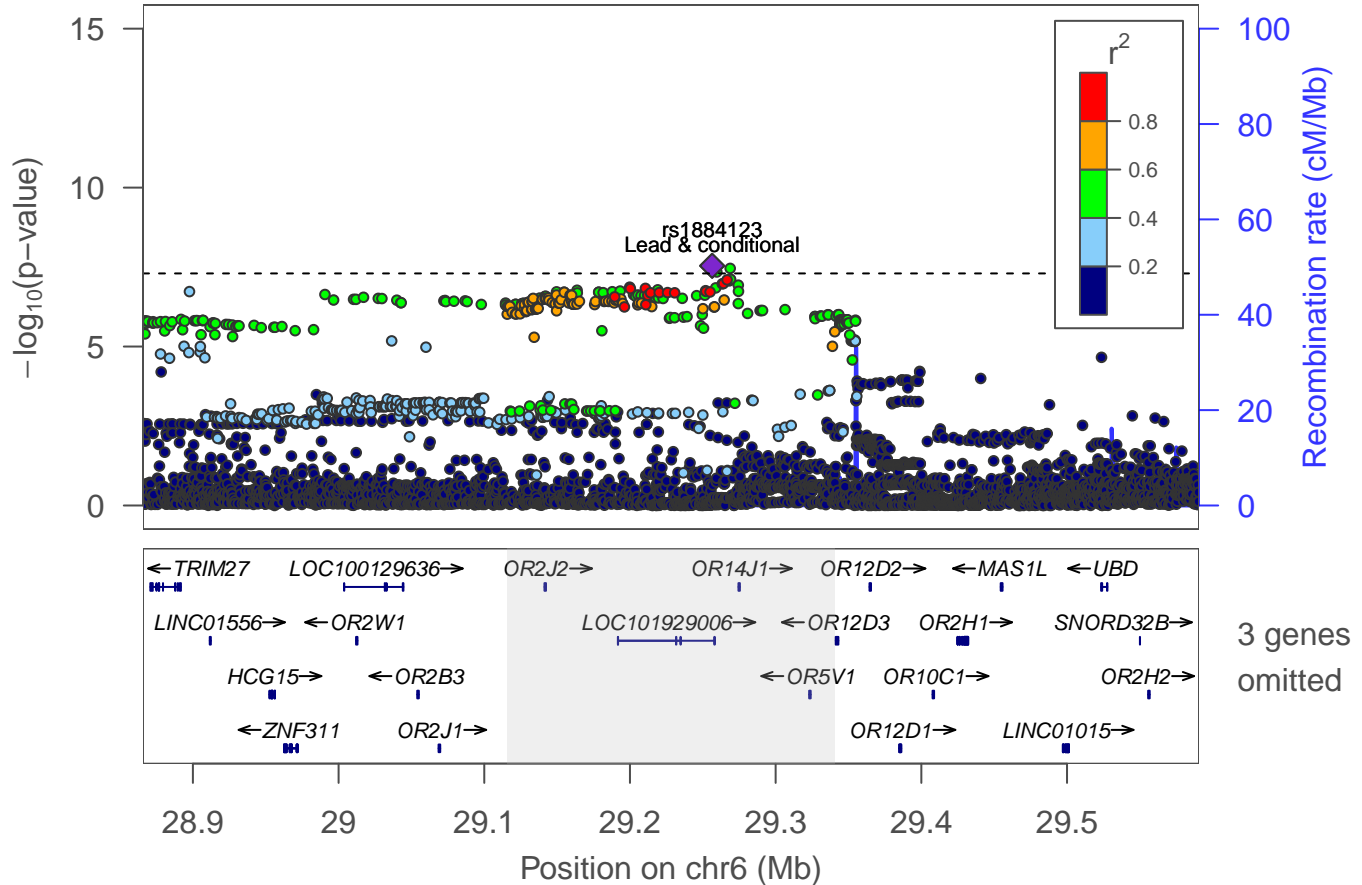



# Adventurousness: locus 58 [chr 6:40.376–40.381Mb]

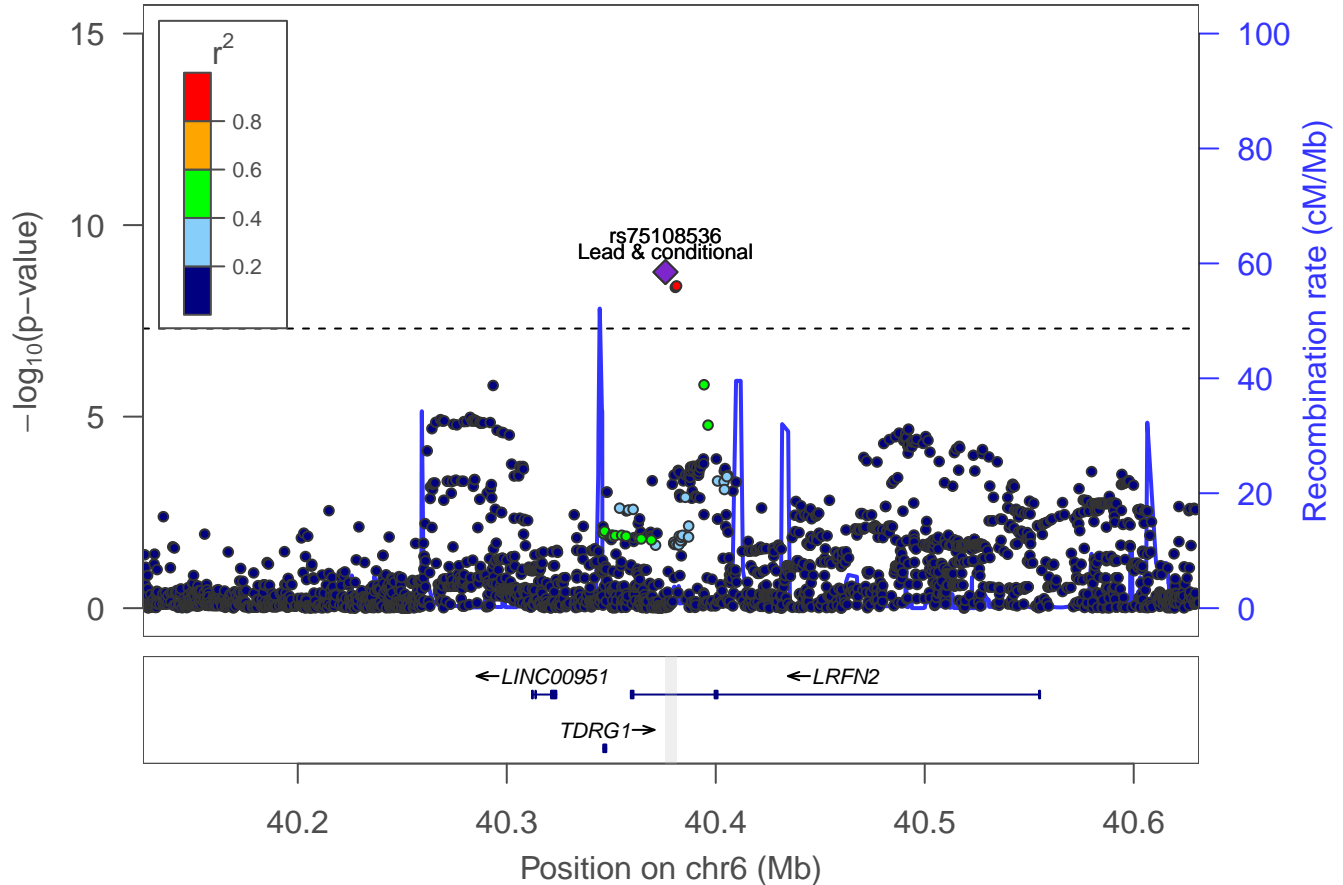

# Adventurousness: locus 59 [chr 6:67.406–67.555Mb]

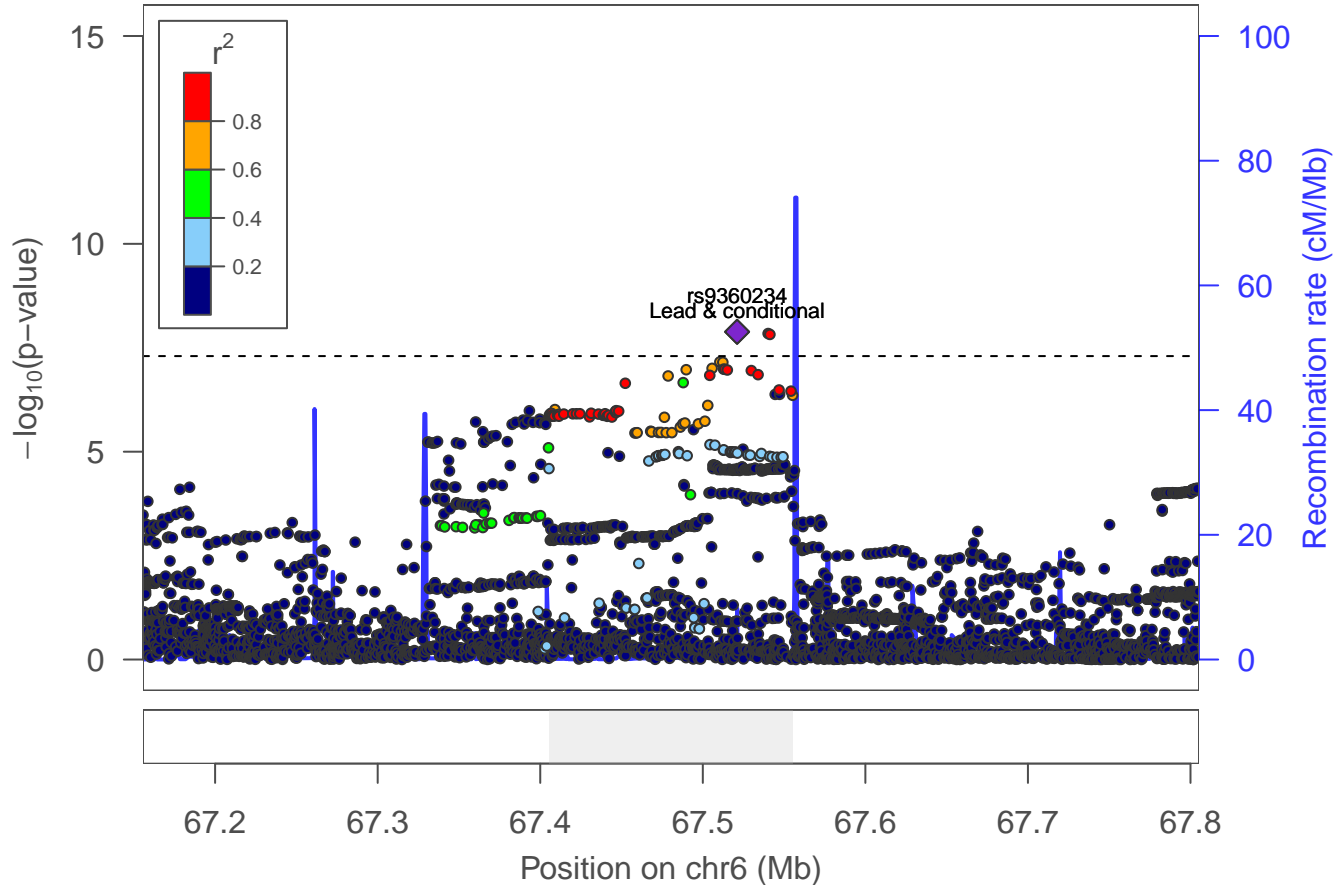

# Adventurousness: locus 60 [chr 6:93.382–93.422Mb]

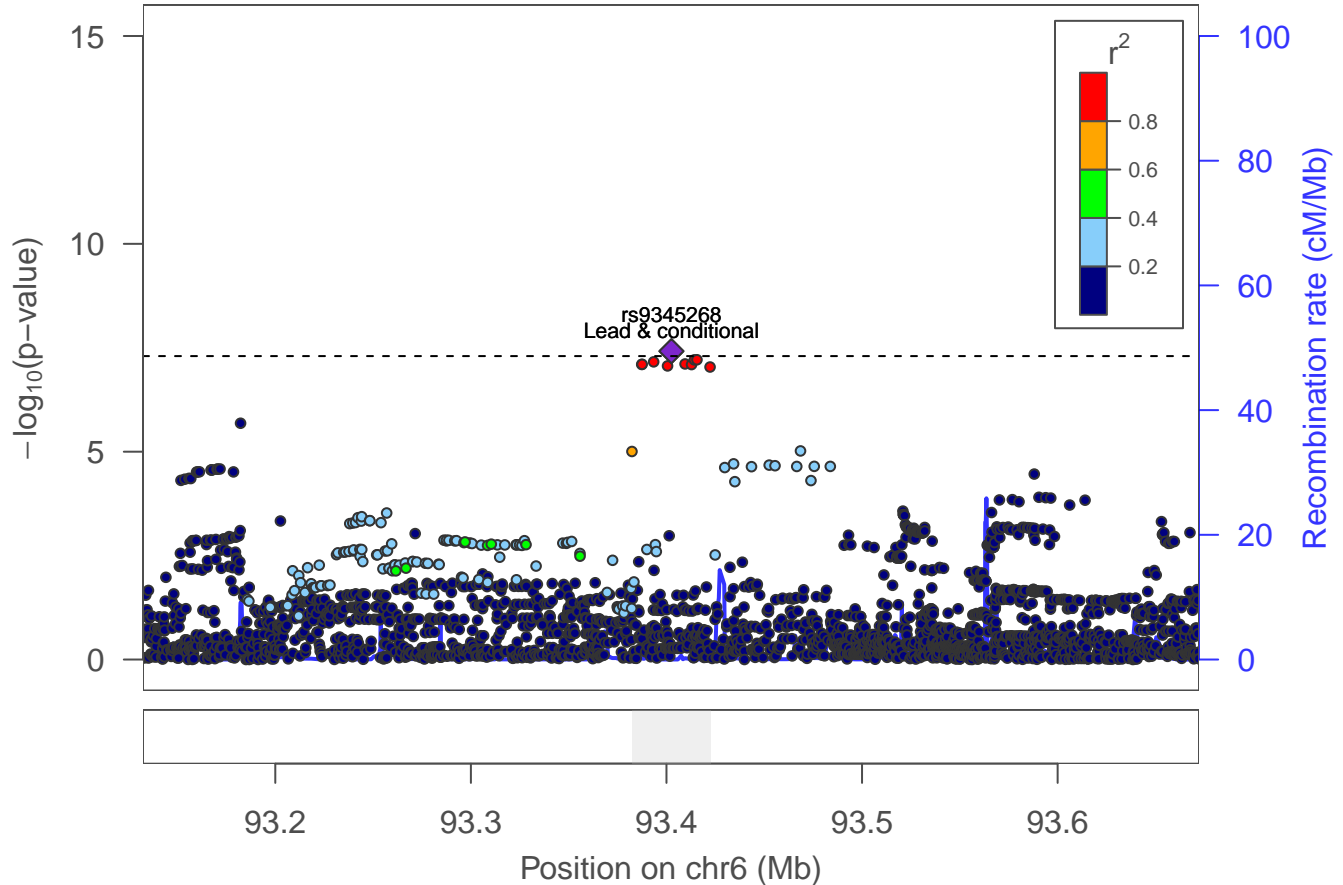

# Adventurousness: locus 61 [chr 7:3.845–3.952Mb]

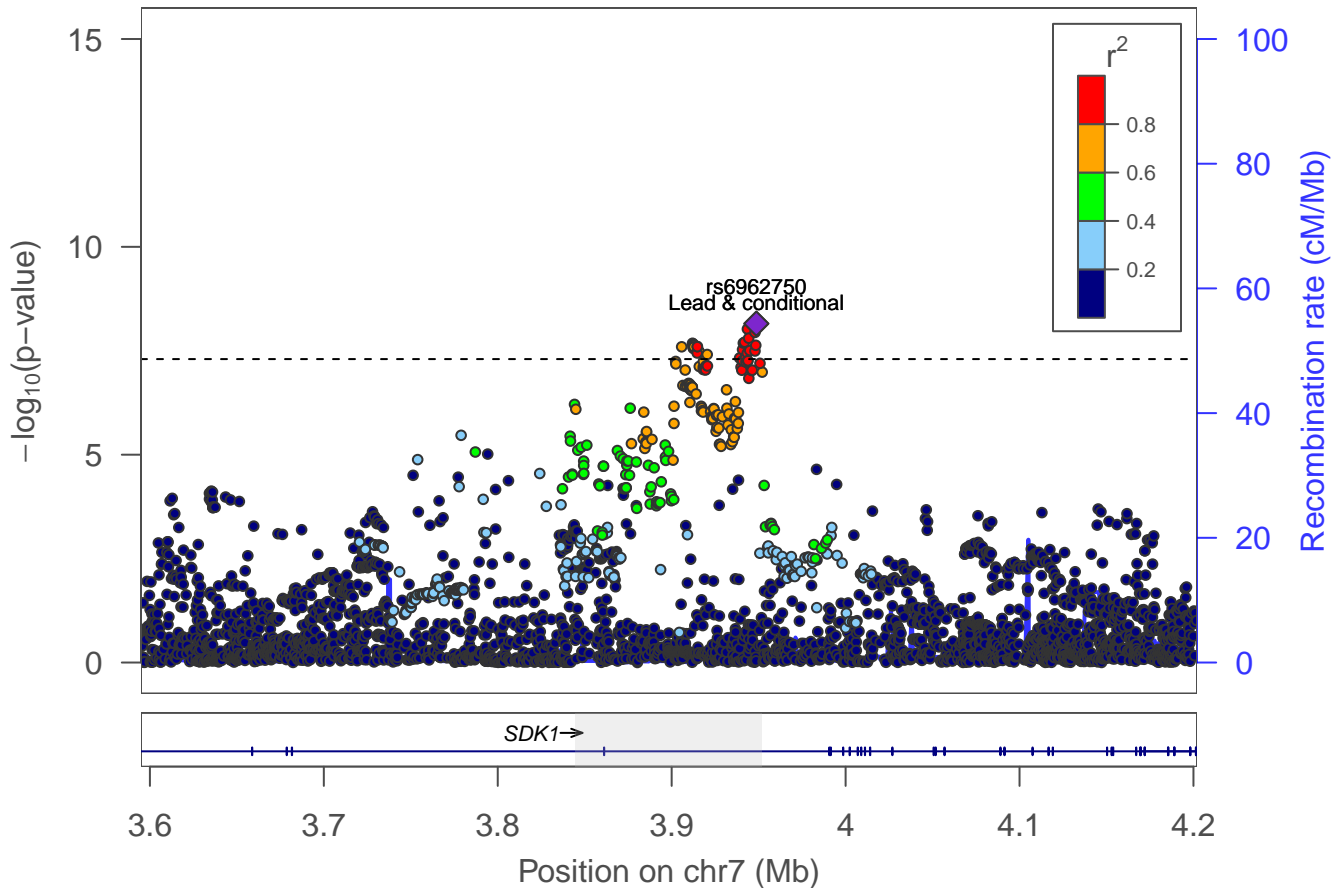

# Adventurousness: locus 62 [chr 7:27.556–27.878Mb]

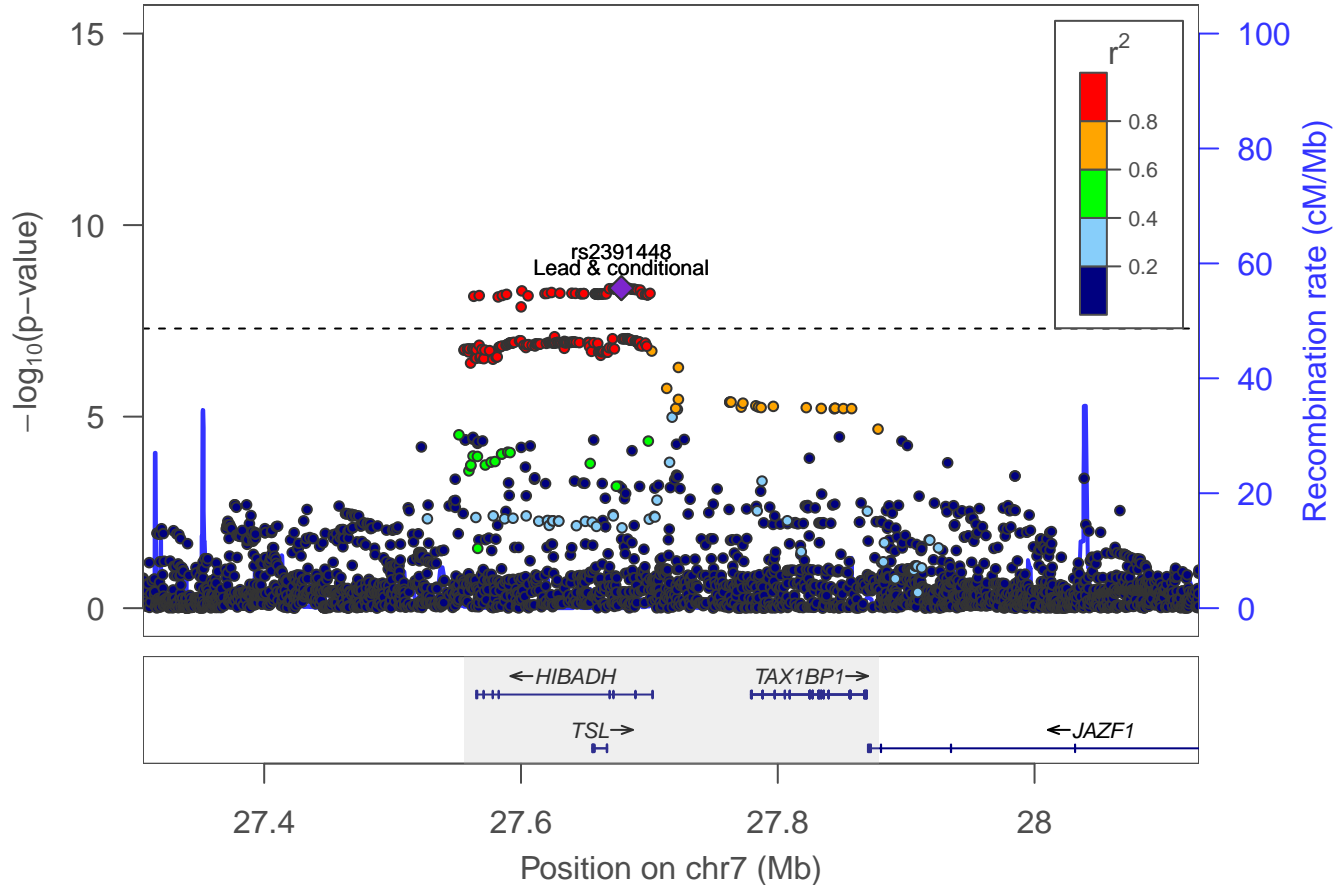

# Adventurousness: Locus 63 [chr 7: 68.923–69.926Mb]

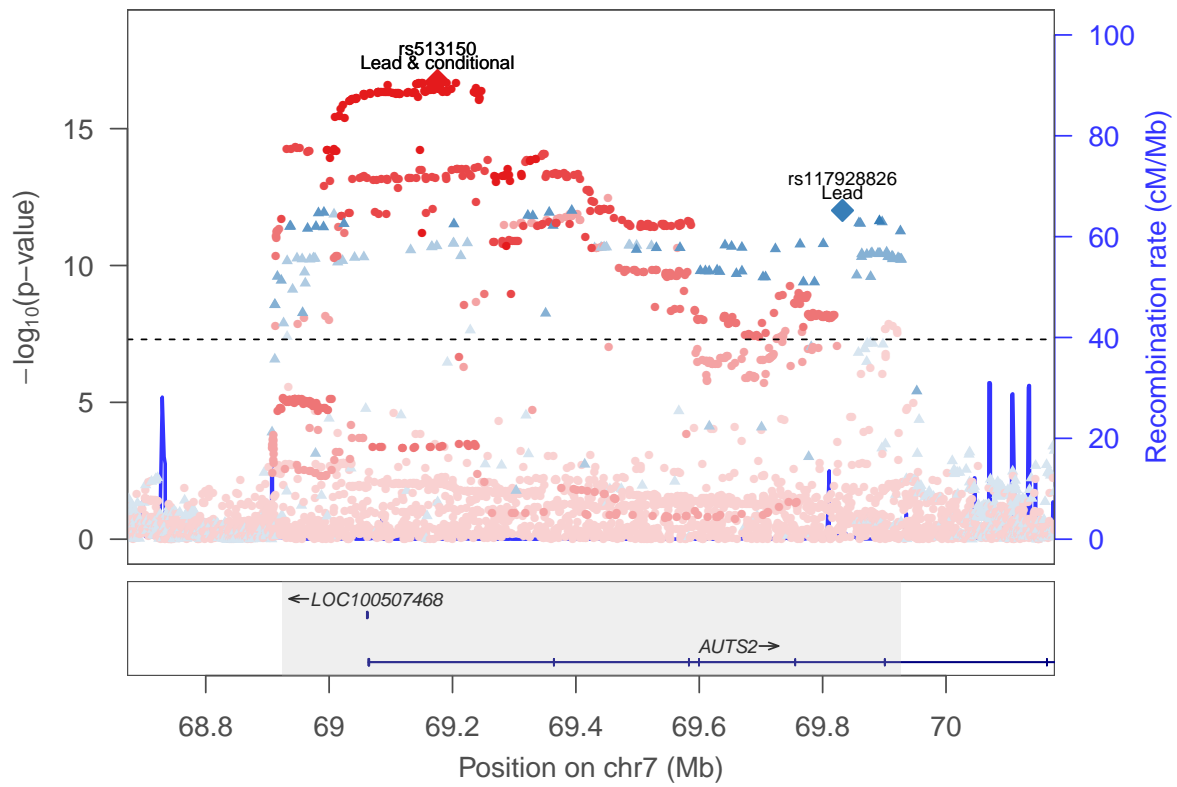

rs117928826 ▲  
rs513150 ●

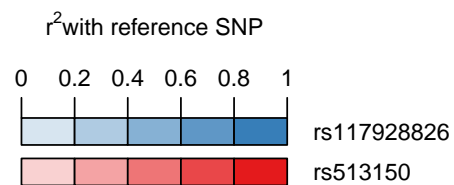

# Adventurousness: locus 64 [chr 7:97.348–97.384Mb]

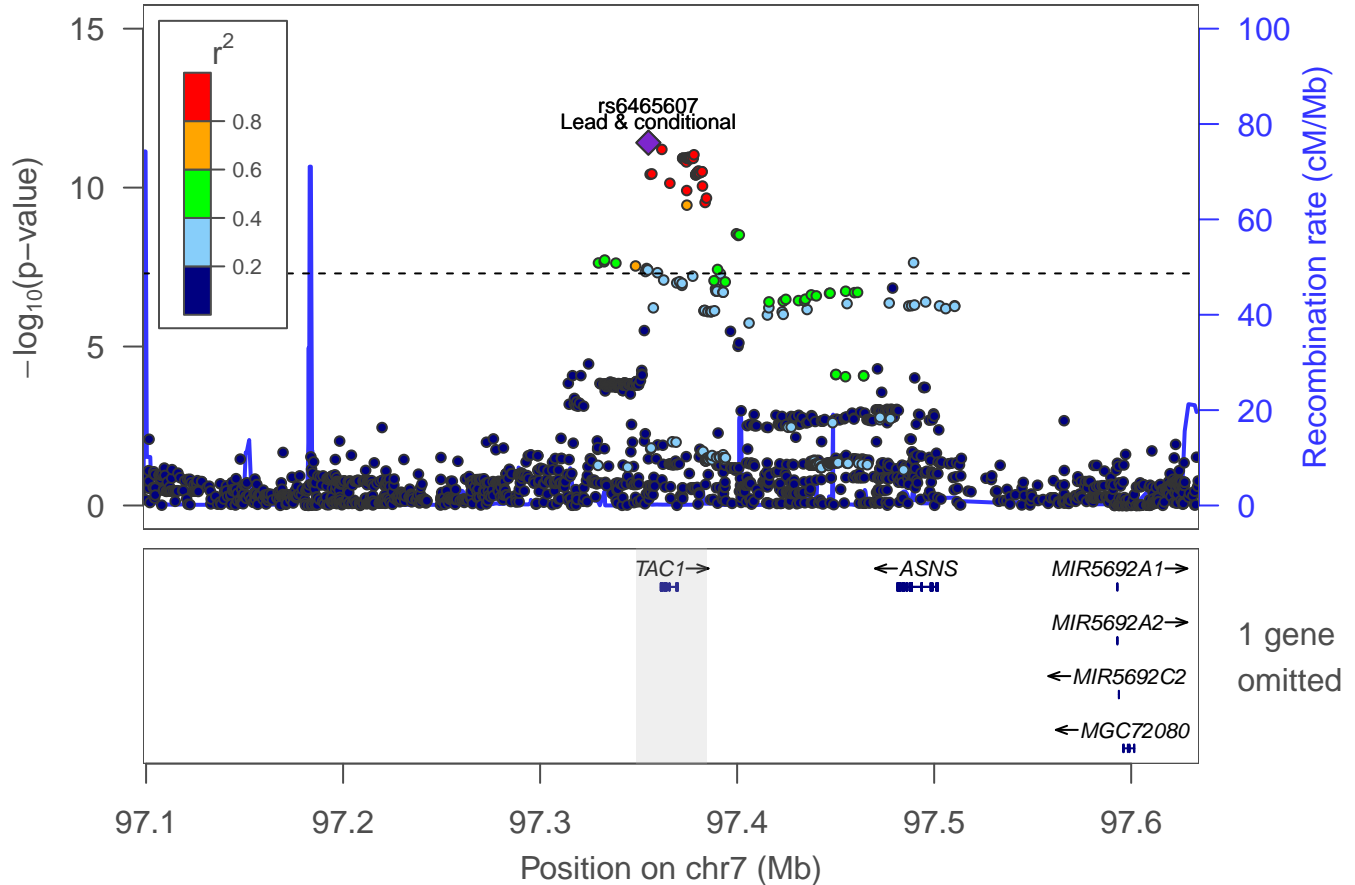

# Adventurousness: locus 65 [chr 7:114.016–114.195Mb]

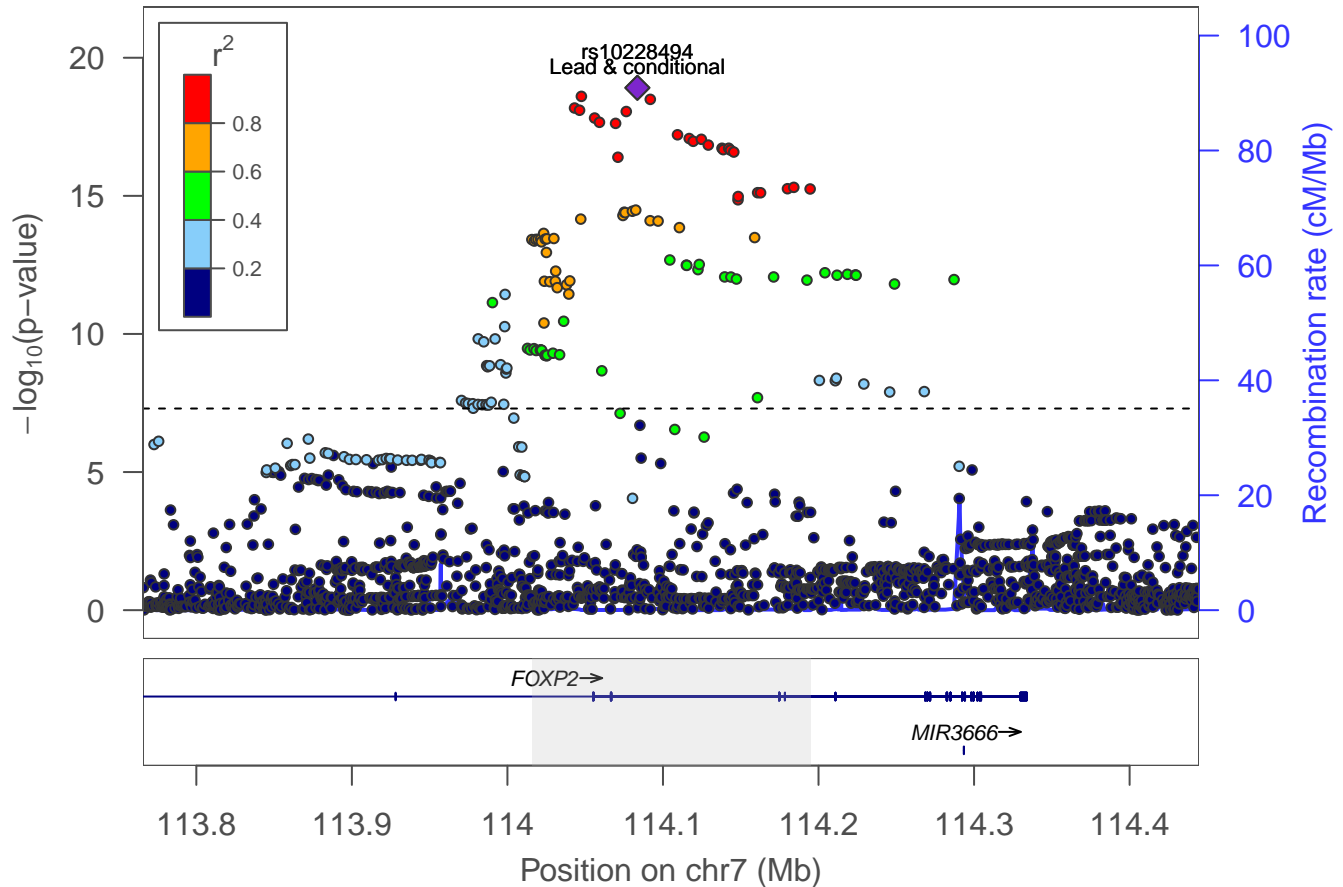



# Adventurousness: locus 66 [chr 7:114.946–115.113Mb]

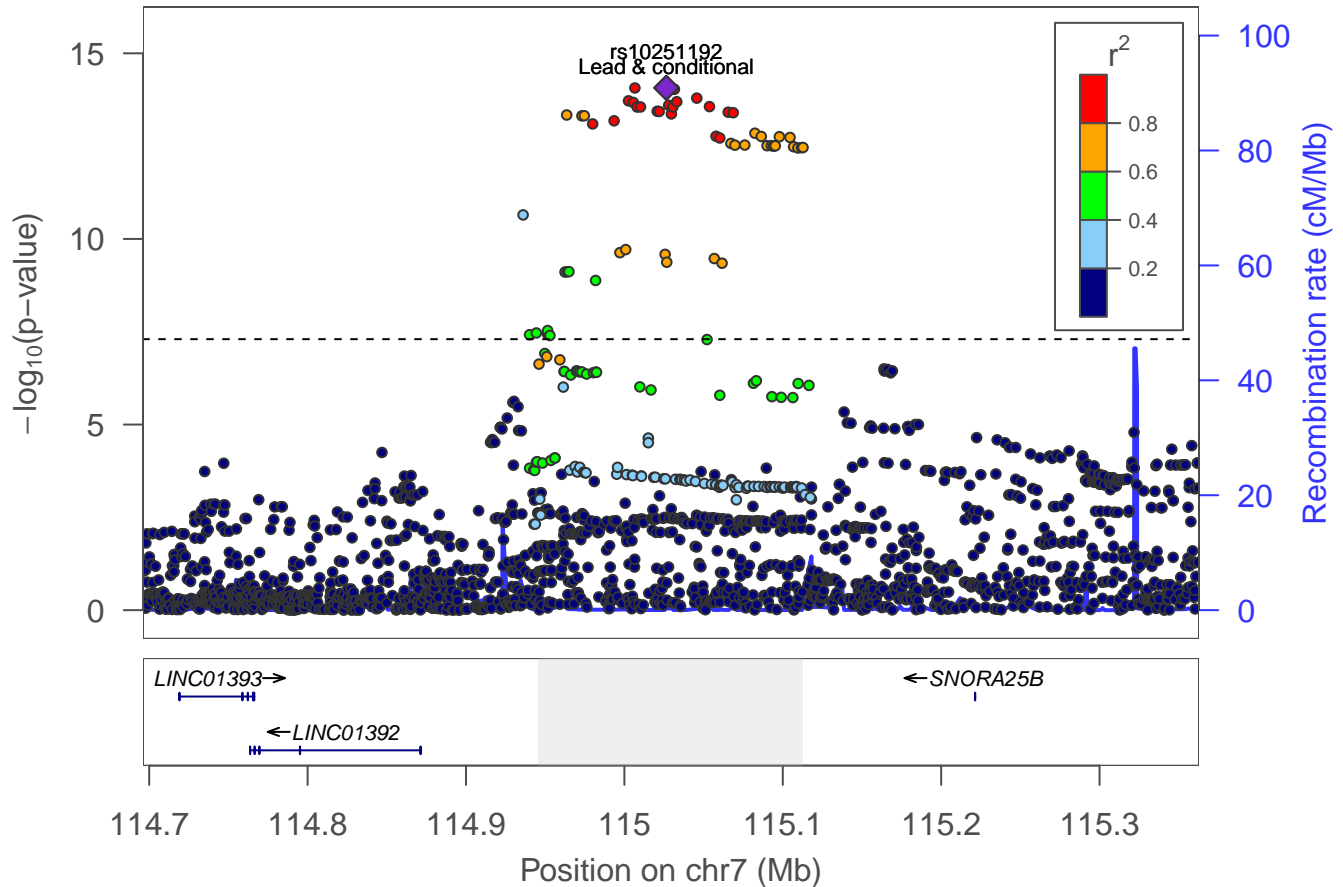

# Adventurousness: Locus 67 [chr 7: 127.596–127.766Mb]

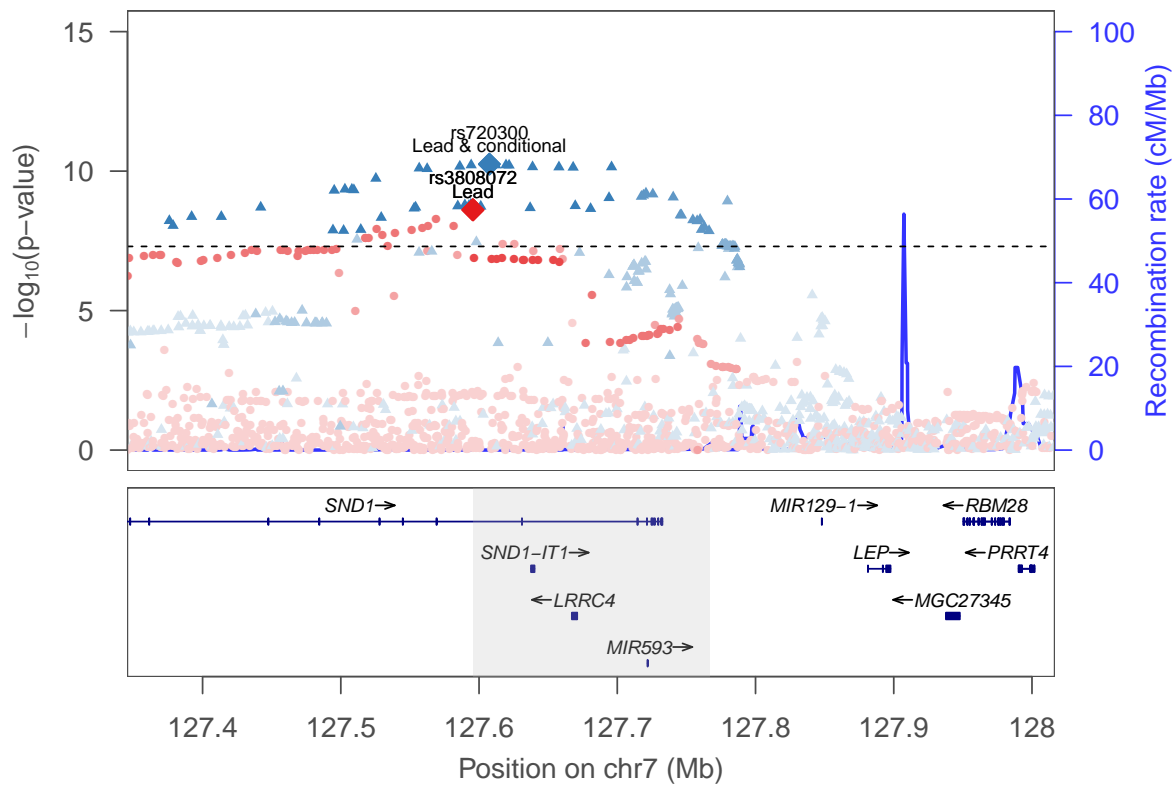

rs720300 ▲  
rs3808072 ●

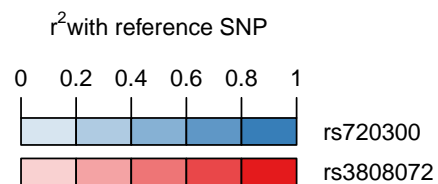

# Adventurousness: locus 68 [chr 7:137.042–137.085Mb]

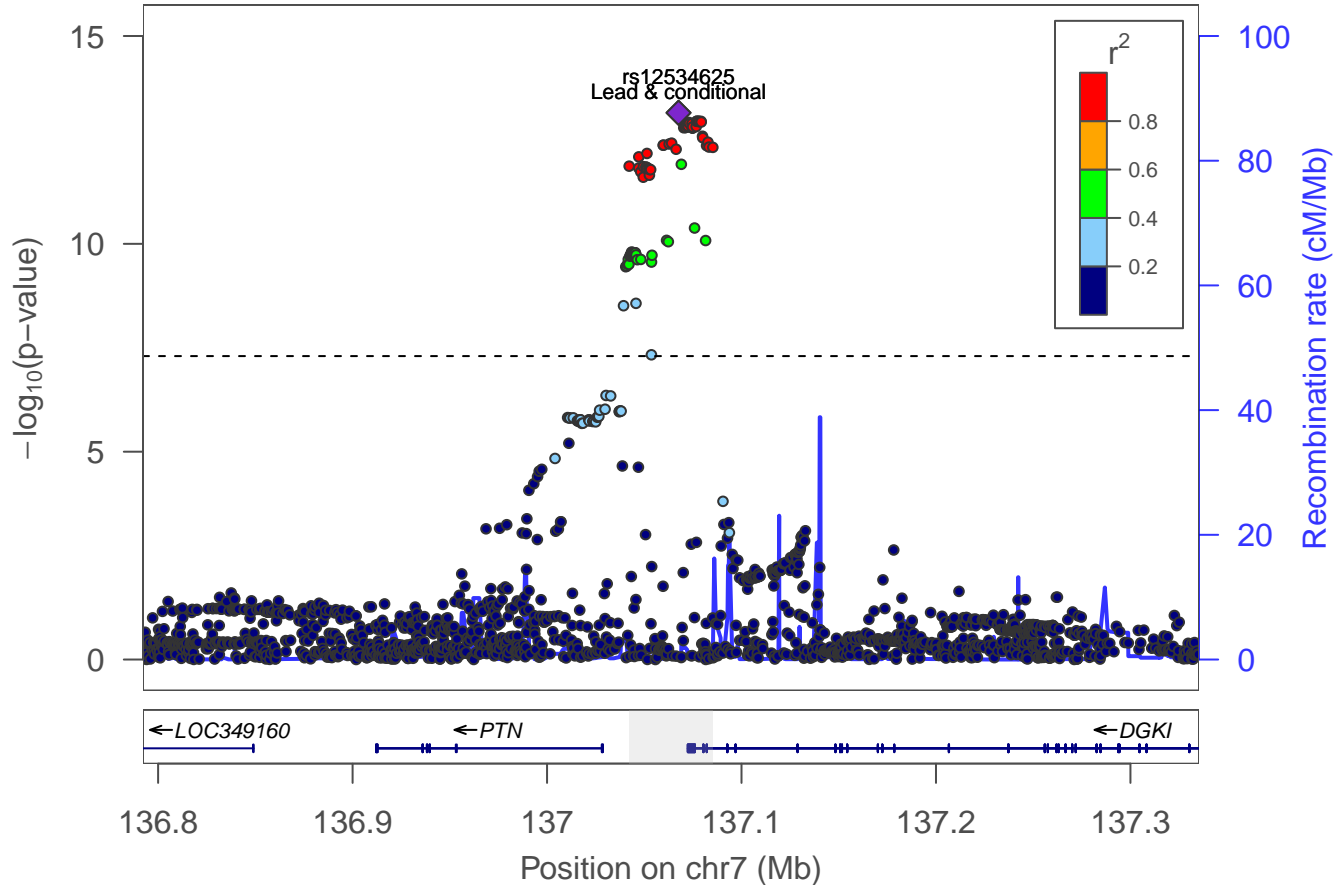

# Adventurousness: locus 69 [chr 8:8.527–8.732Mb]

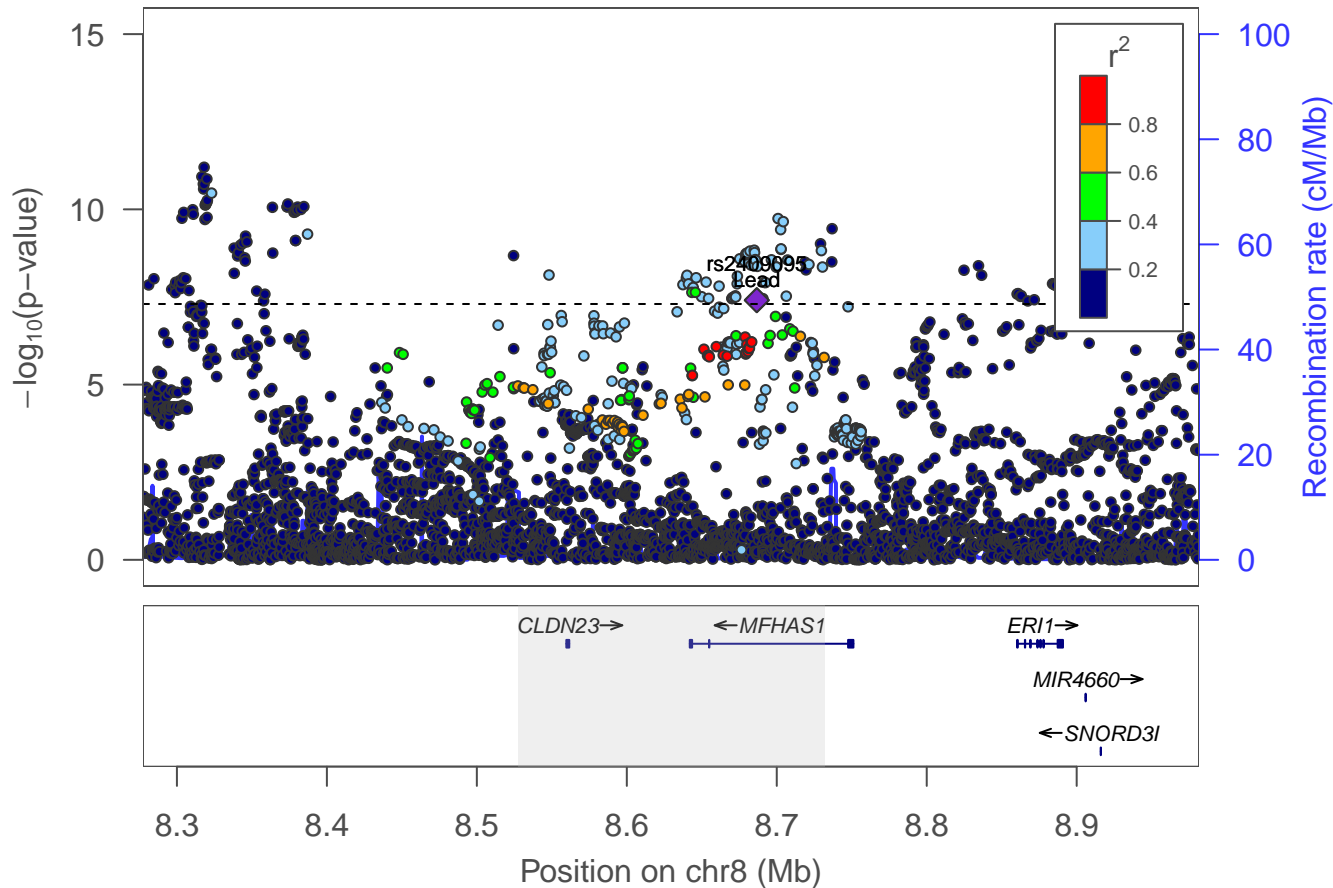

# Adventurousness: locus 70 [chr 8:10.571–10.771Mb]

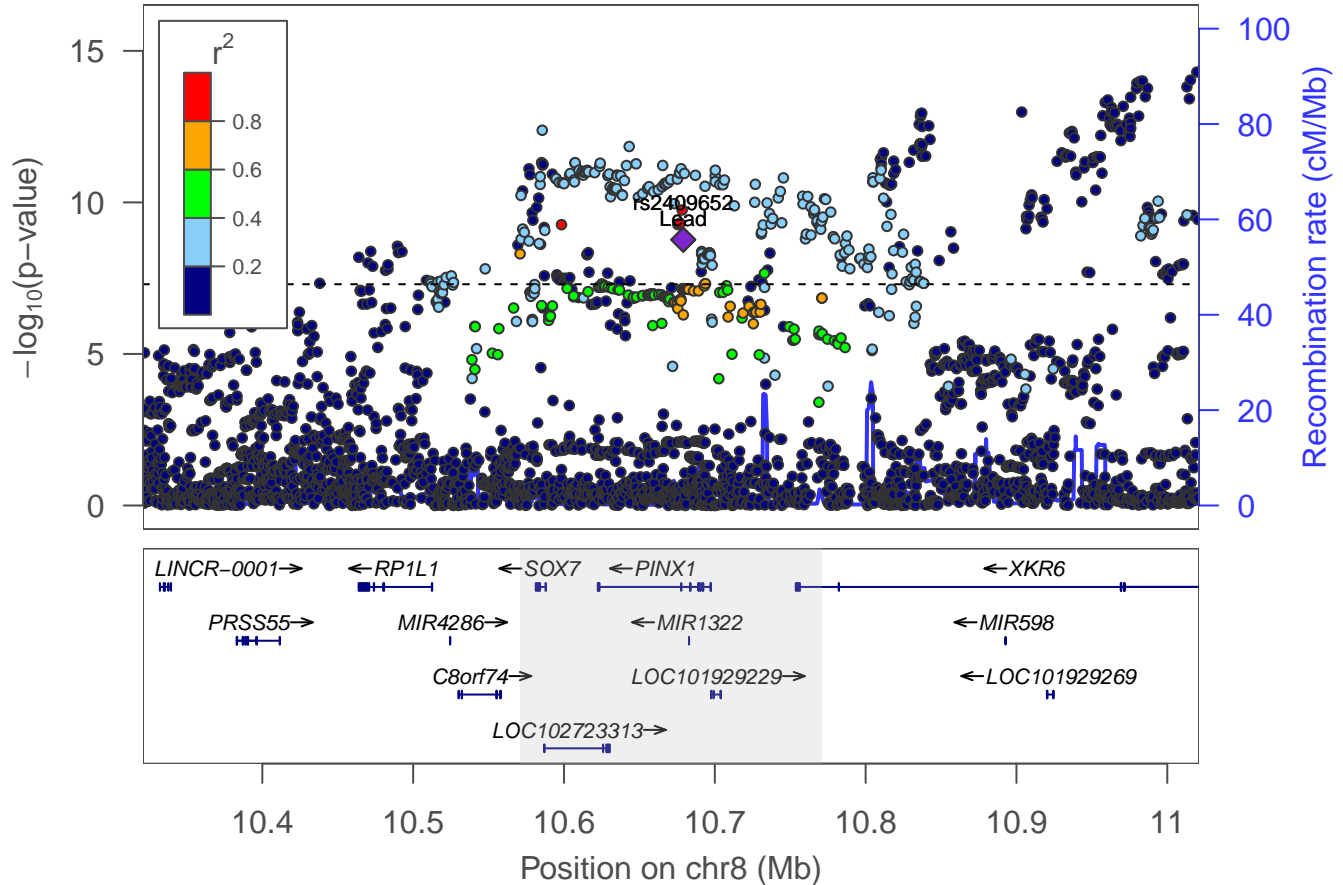

# Adventurousness: Locus 71 [chr 8: 11.036–11.128Mb]

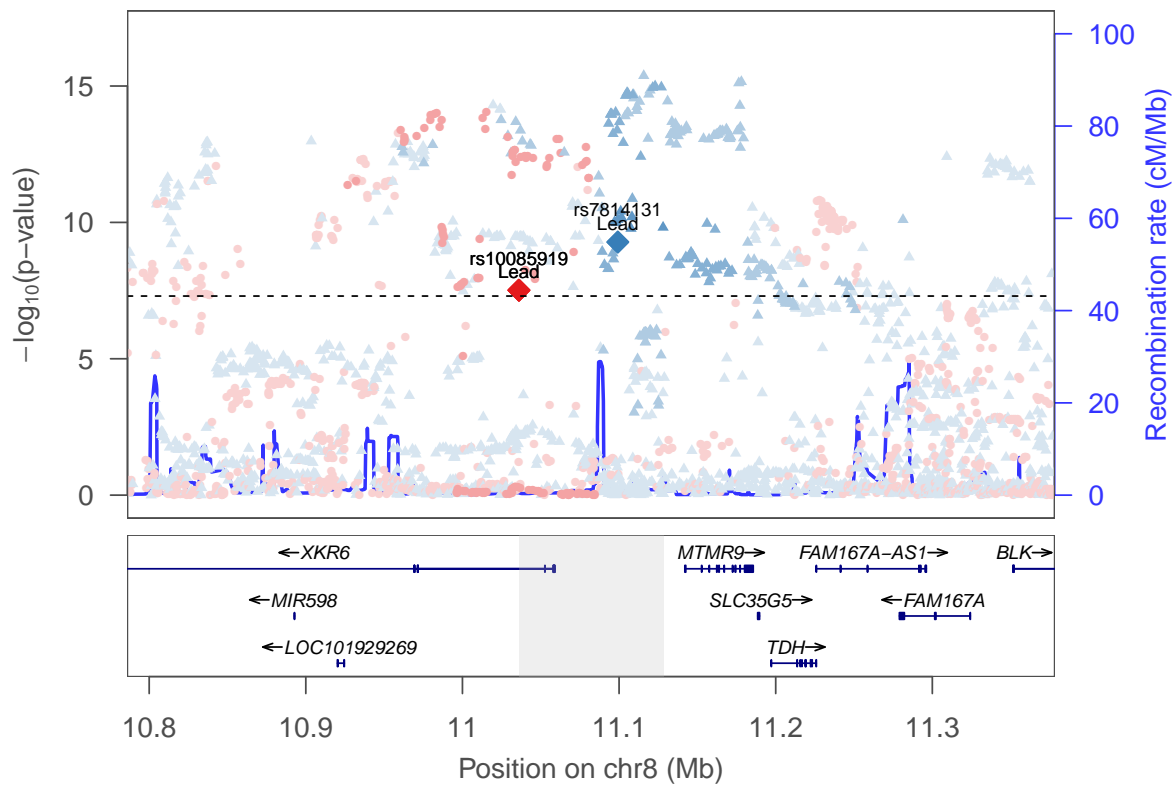

rs7814131 ▲  
rs10085919 ●

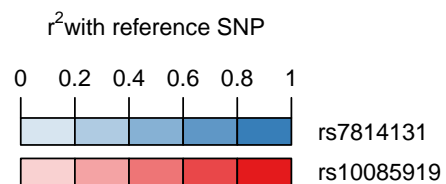

# Adventurousness: locus 72 [chr 8:11.430–11.463Mb]

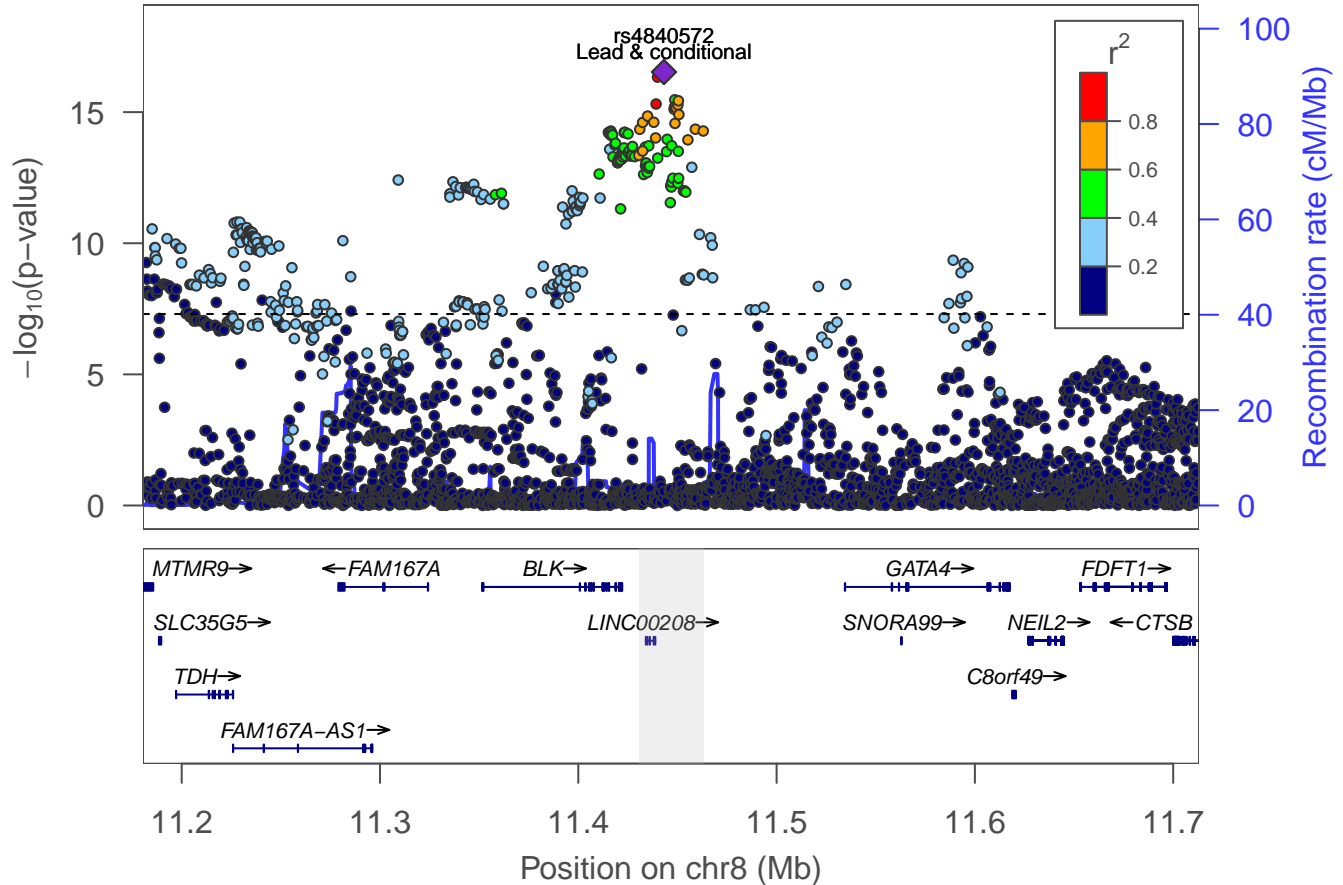

# Adventurousness: locus 73 [chr 8:65.438–65.534Mb]

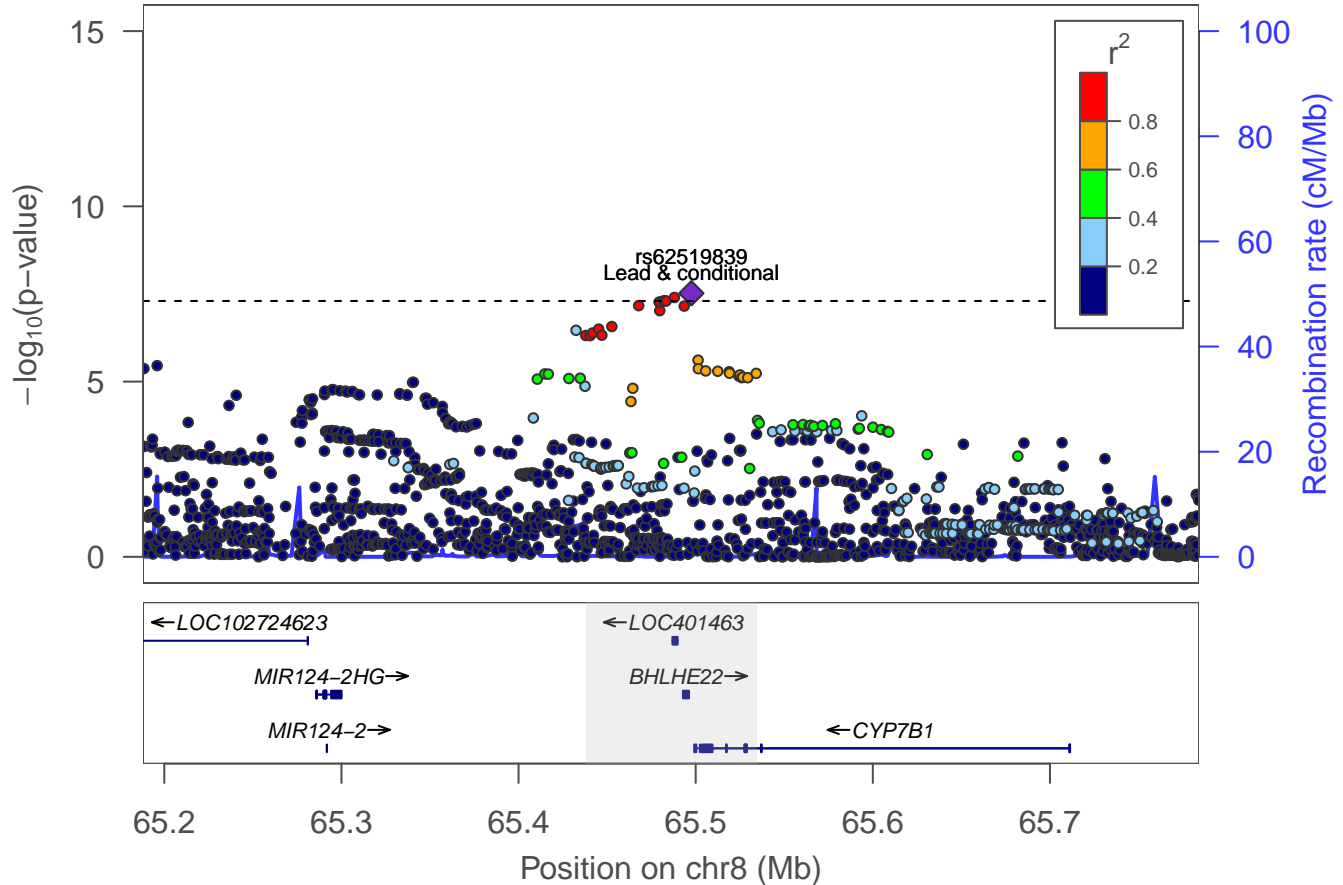



# Adventurousness: locus 74 [chr 8:101.934–101.999Mb]

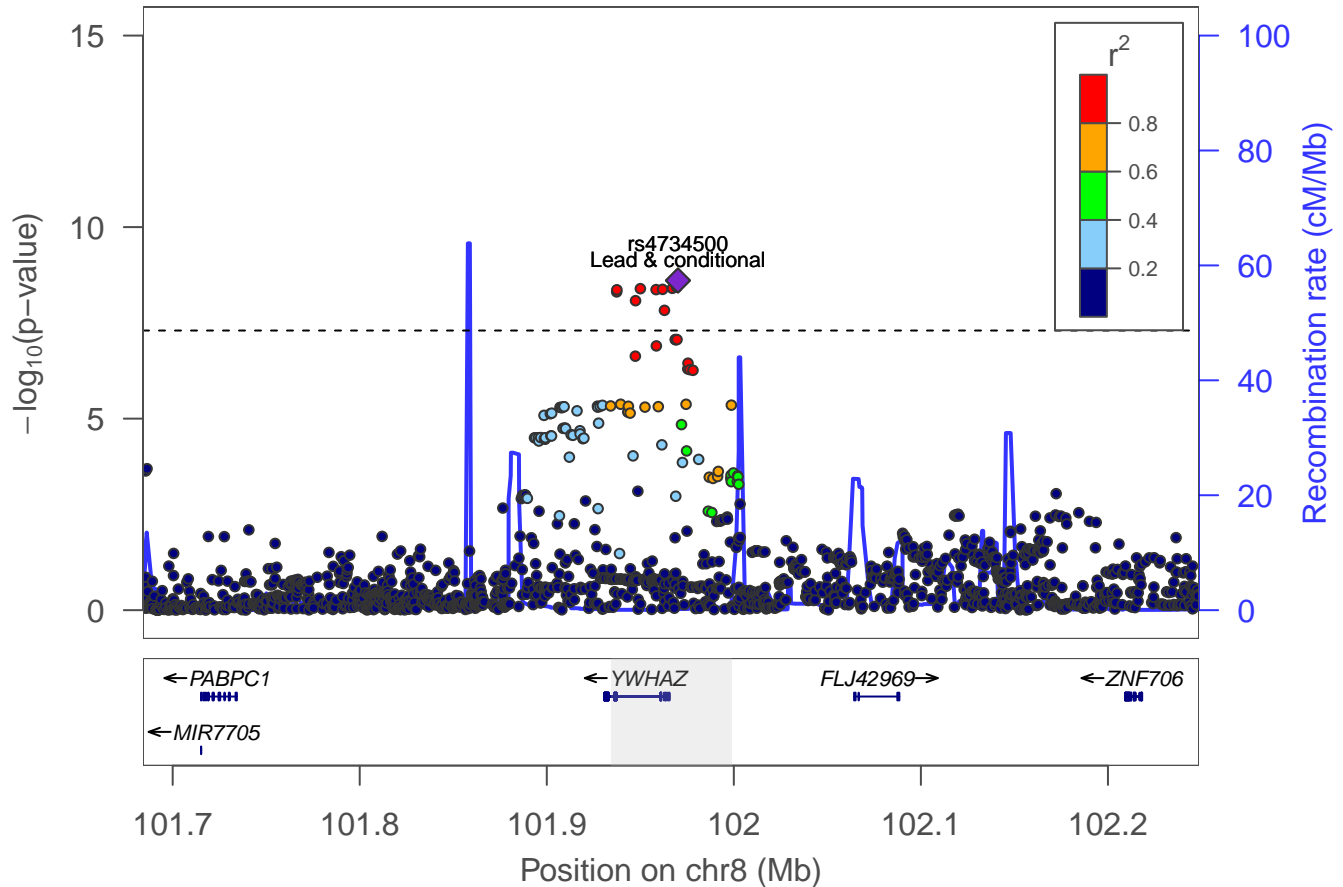

# Adventurousness: locus 75 [chr 8:112.362–112.613Mb]

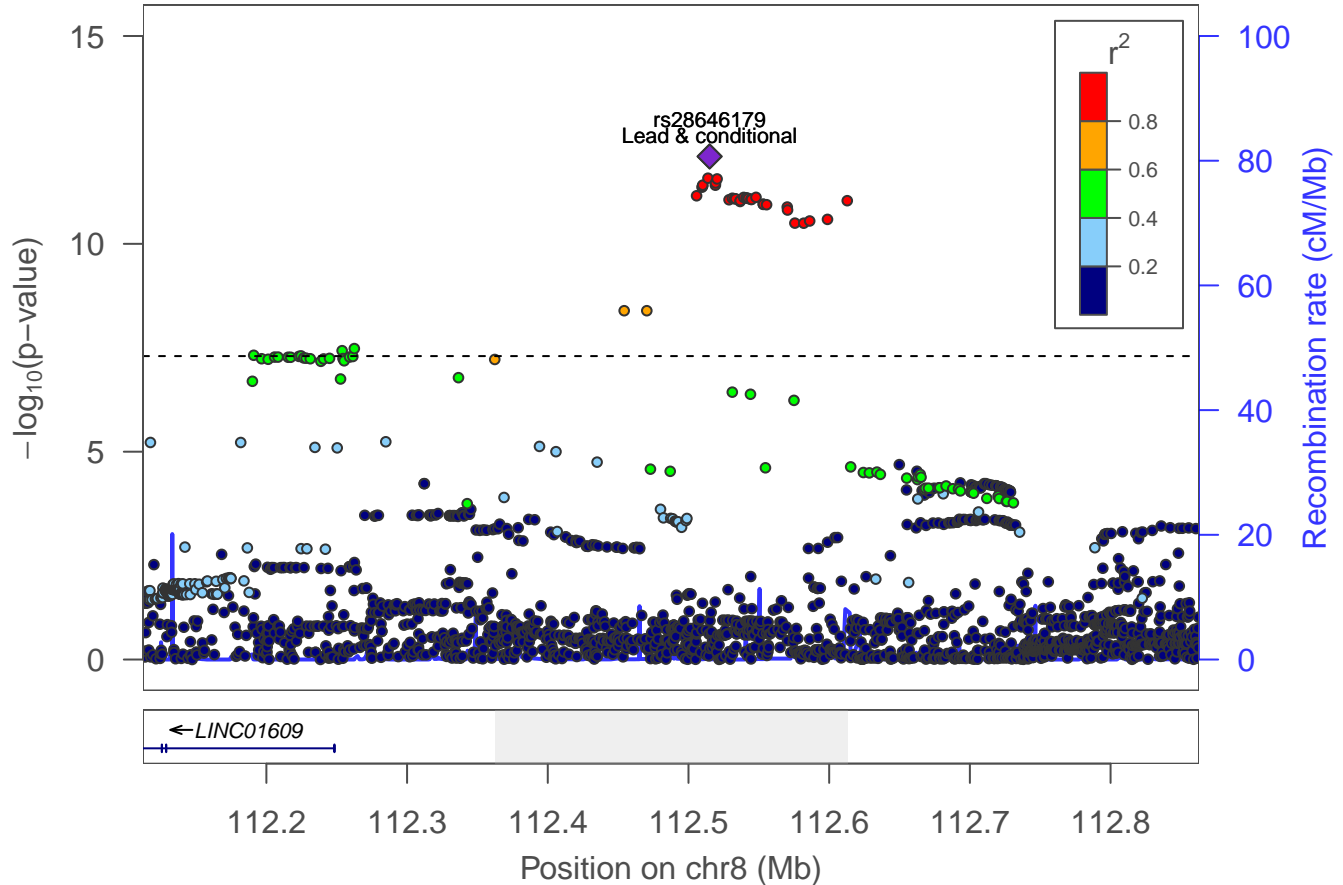

# Adventurousness: locus 76 [chr 8:143.363–143.404Mb]

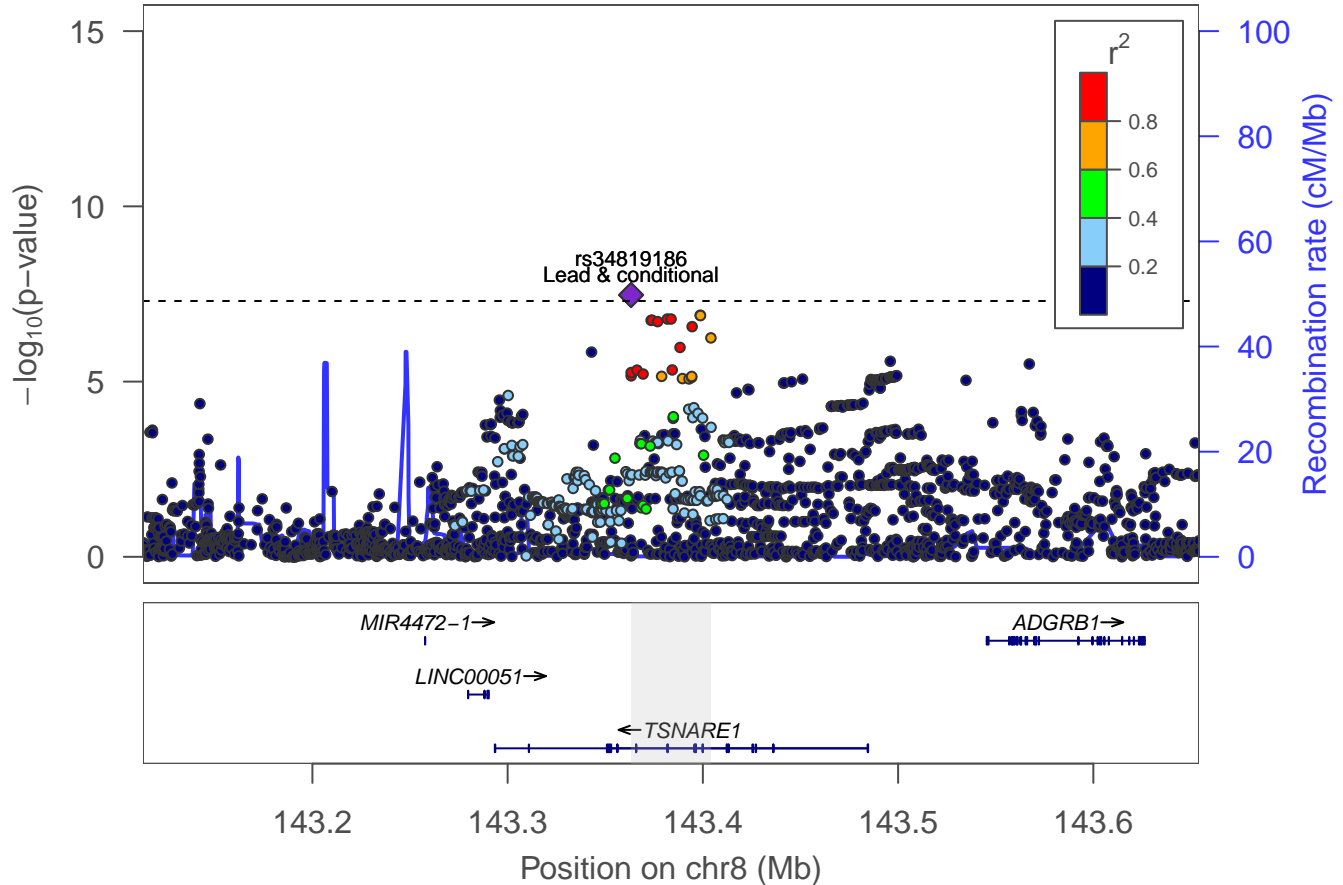

# Adventurousness: locus 77 [chr 9:15.898–16.054Mb]

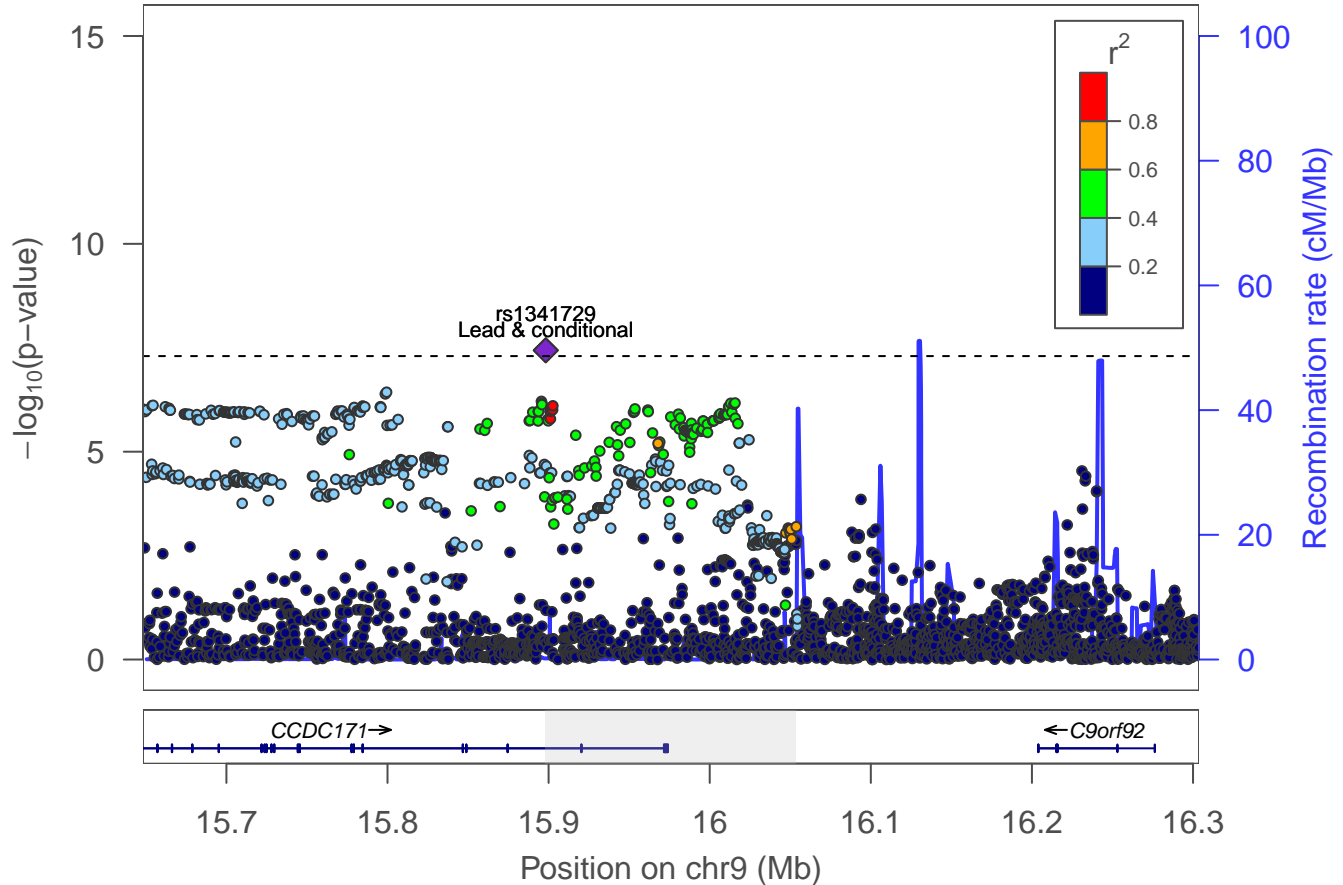

# Adventurousness: locus 78 [chr 9:16.338–16.354Mb]

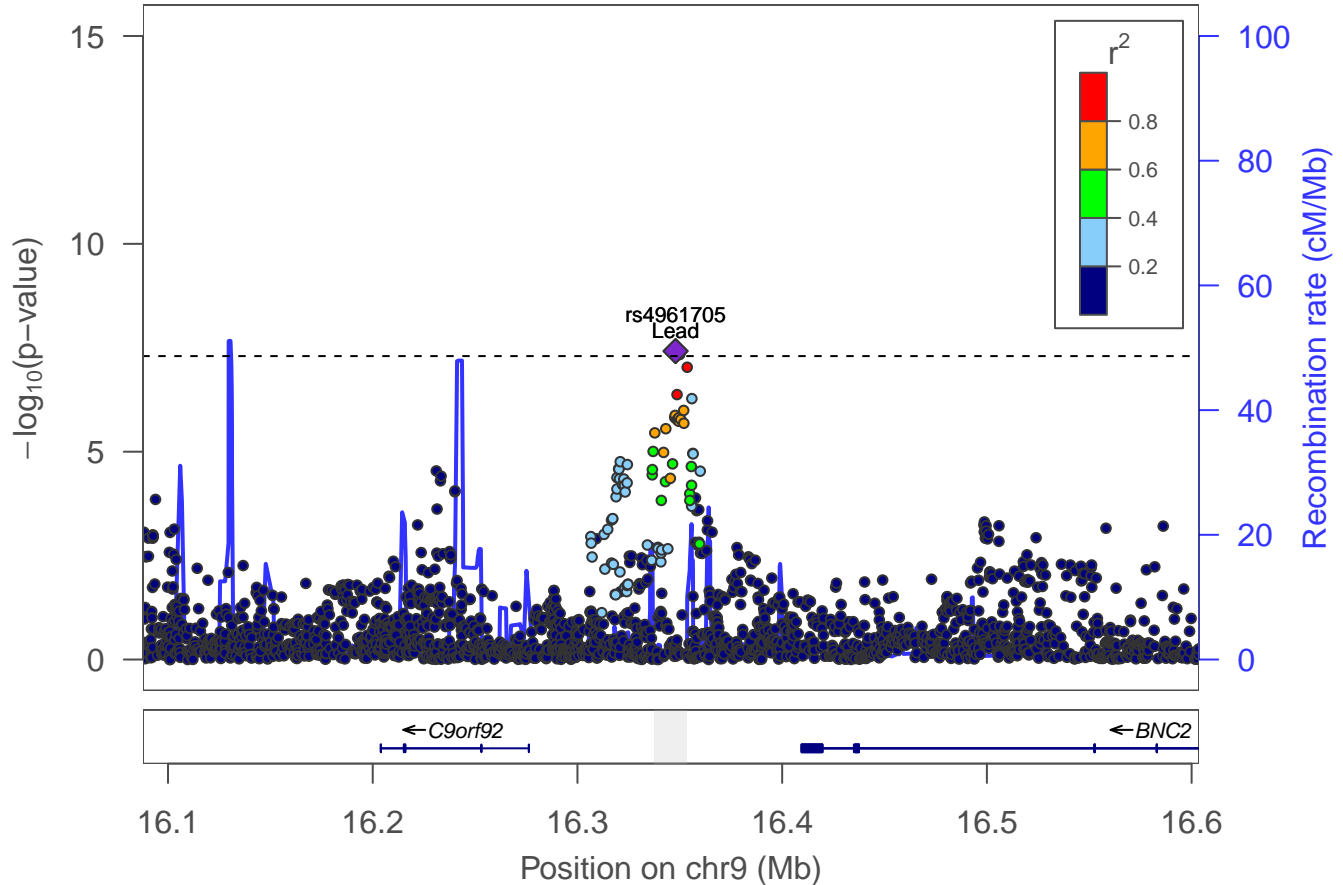

# Adventurousness: locus 79 [chr 9:16.677–16.677Mb]

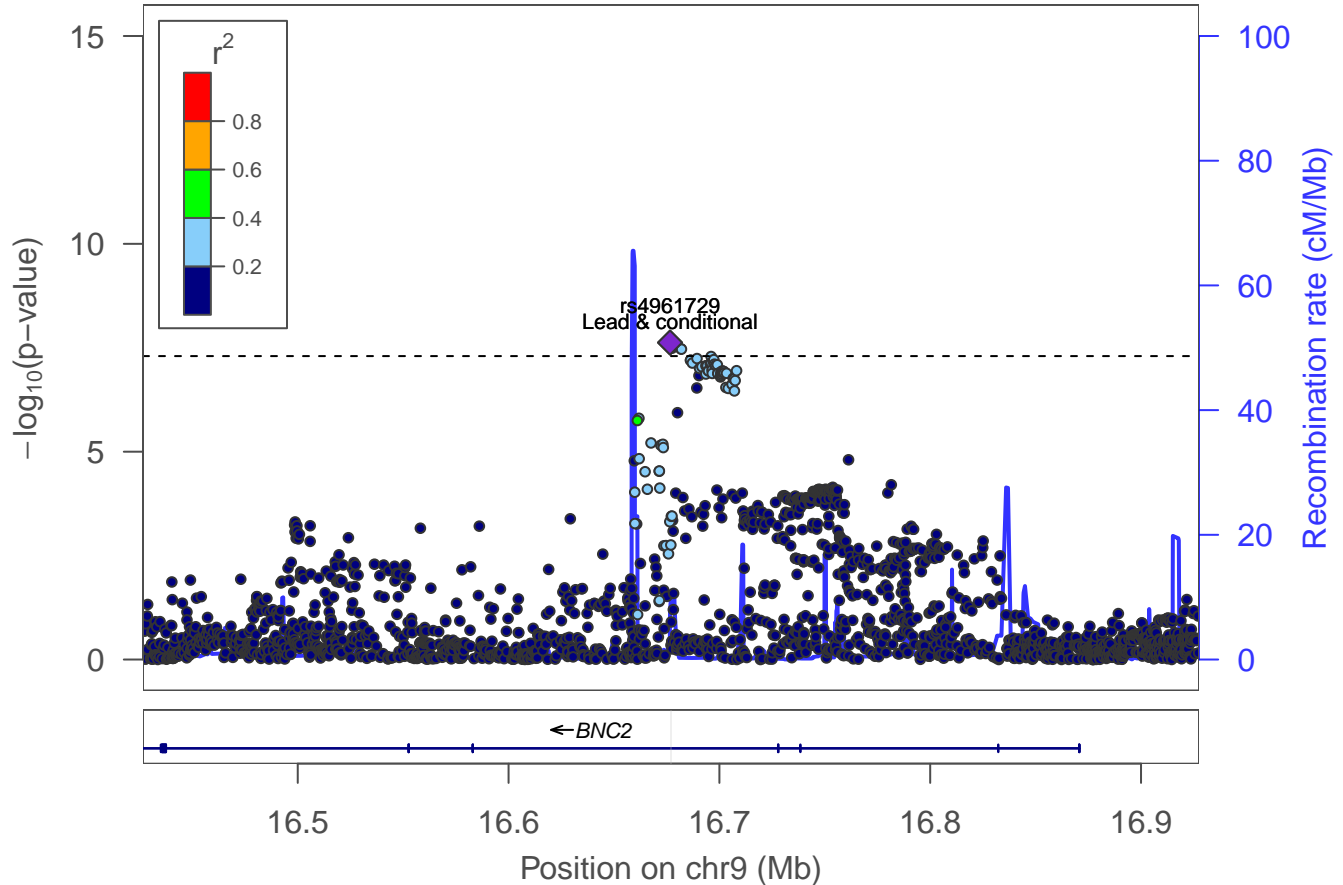

# Adventurousness: locus 80 [chr 9:19.688–19.719Mb]

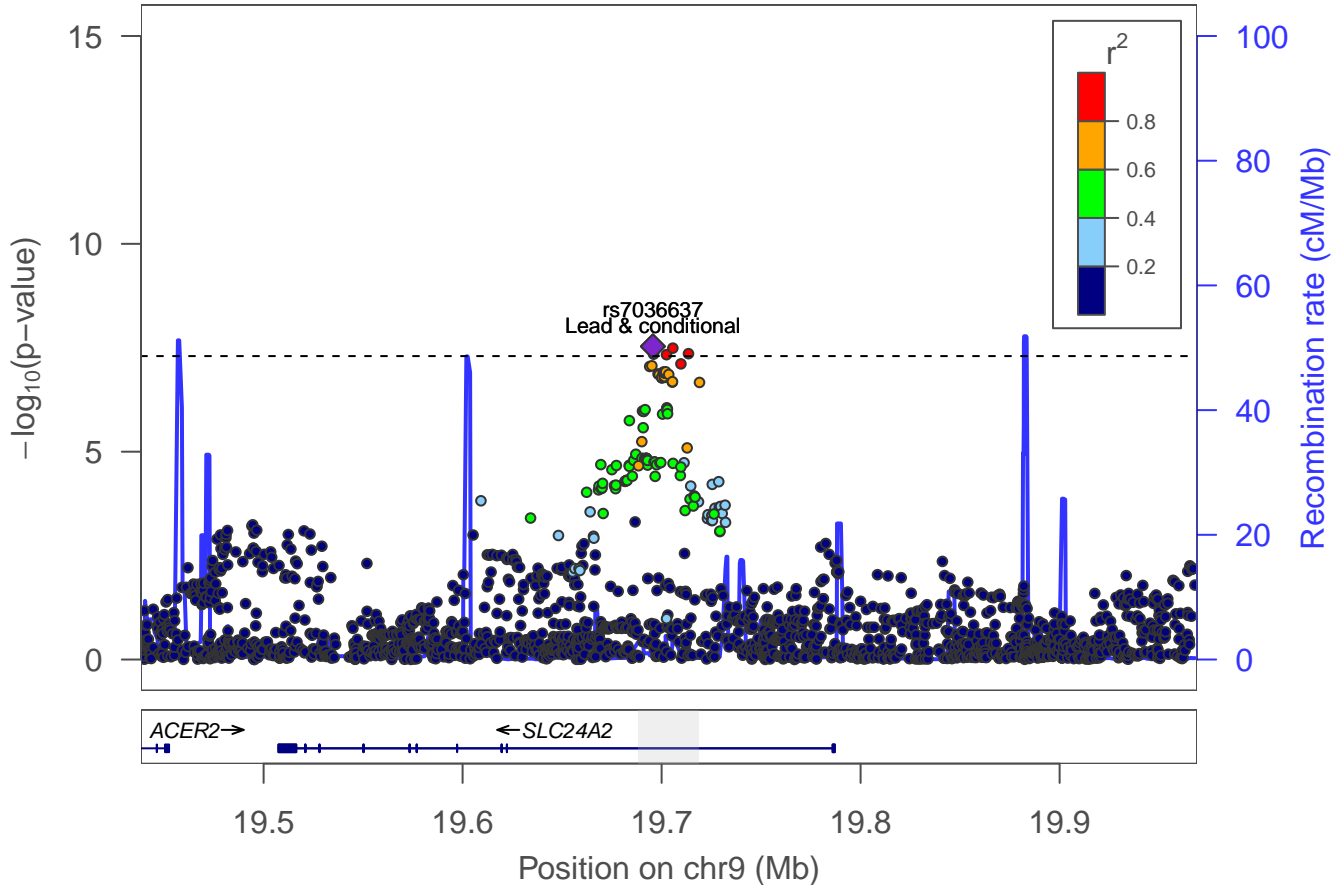

# Adventurousness: locus 81 [chr 9:22.934–22.943Mb]

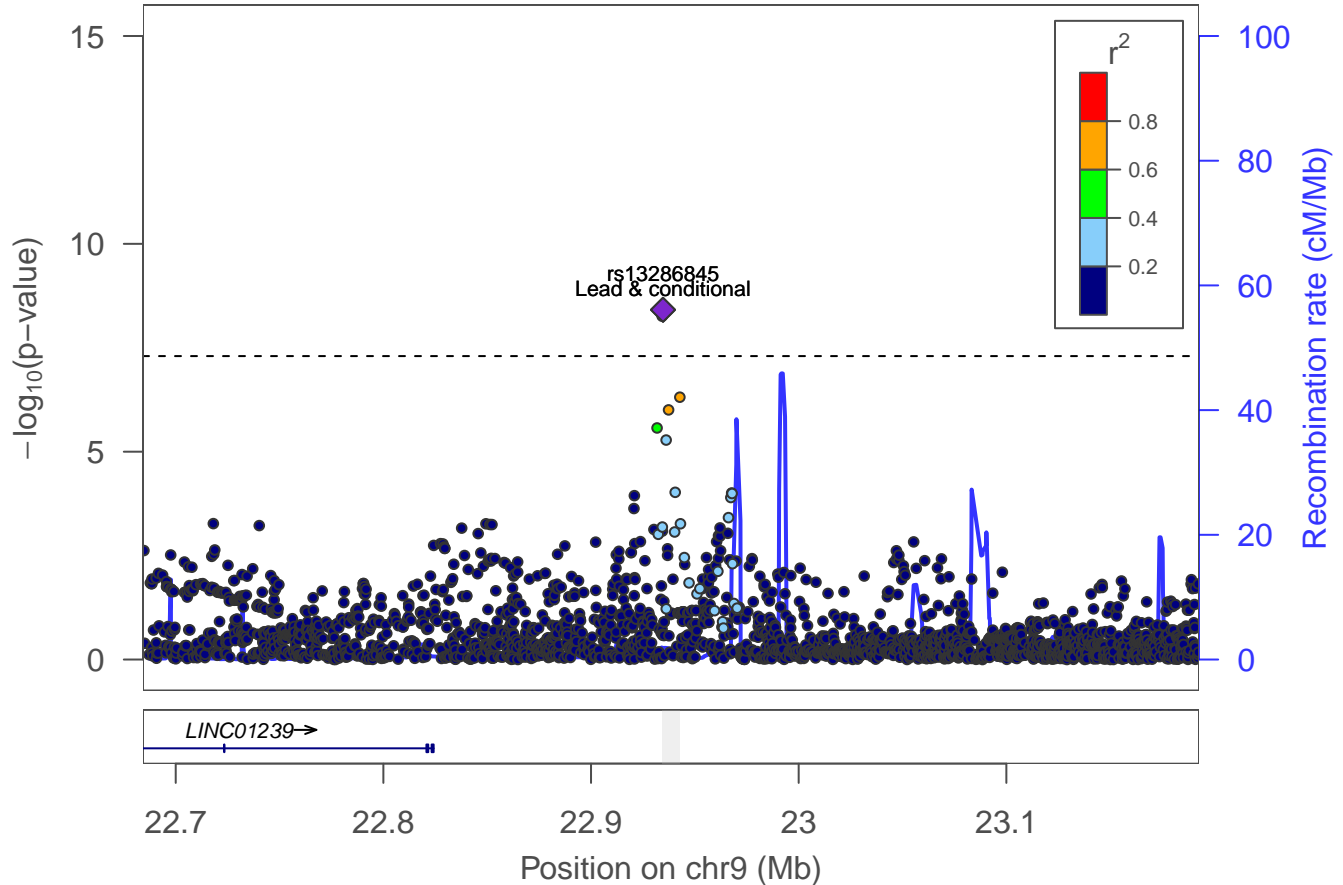



# Adventurousness: locus 82 [chr 9:98.211–98.314Mb]

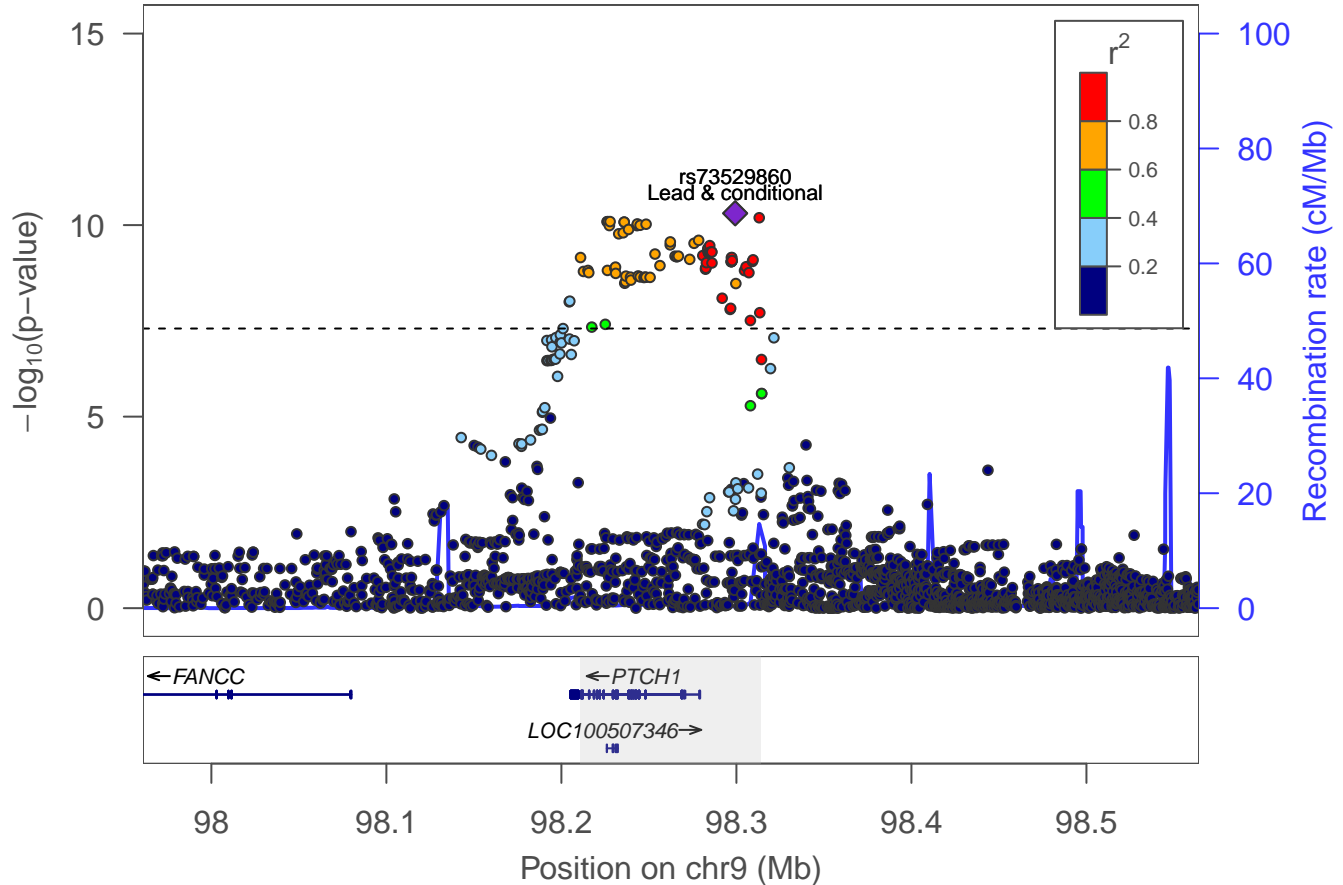

# Adventurousness: locus 83 [chr 9:116.507–116.628Mb]

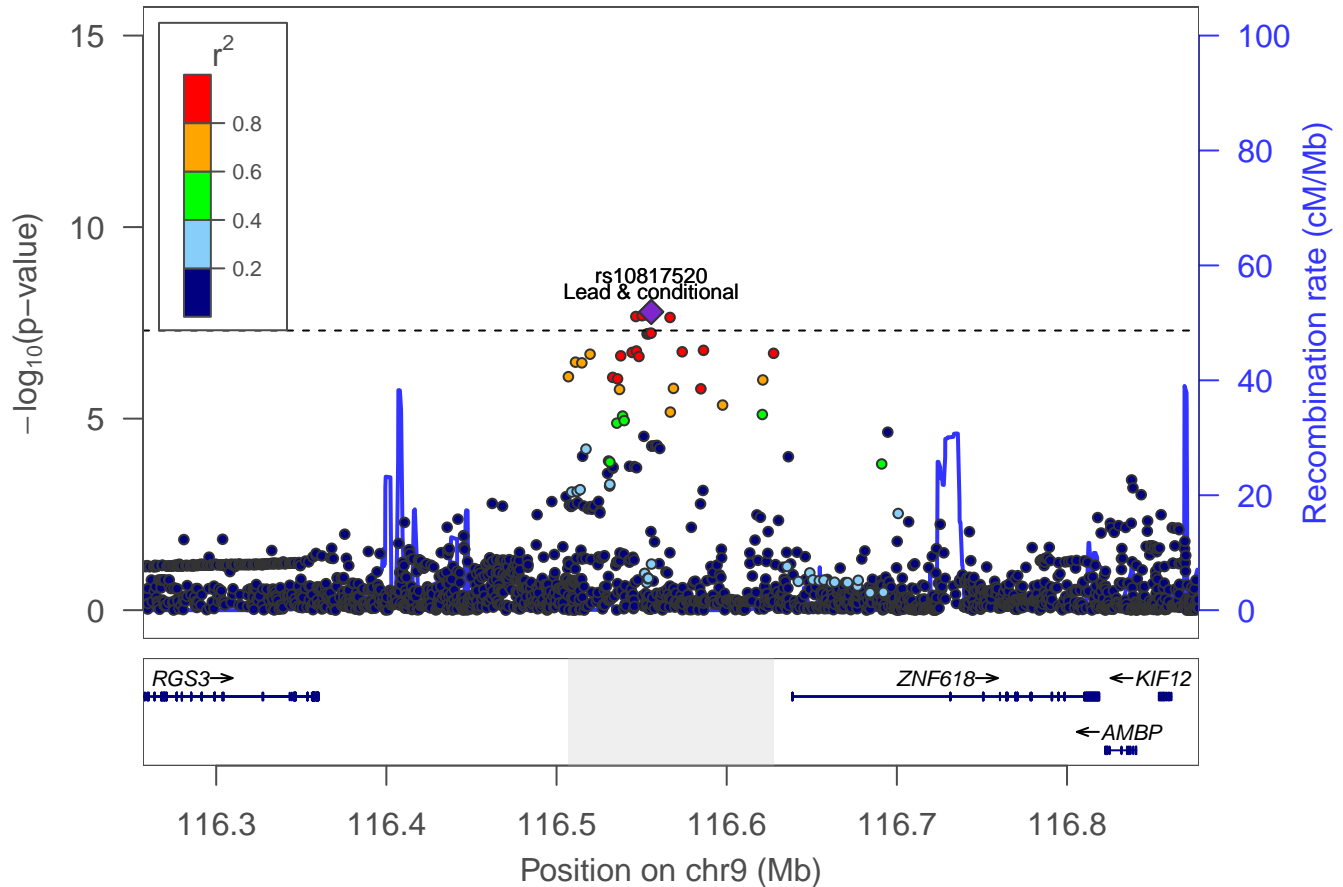

# Adventurousness: locus 84 [chr 9:126.196–126.286Mb]

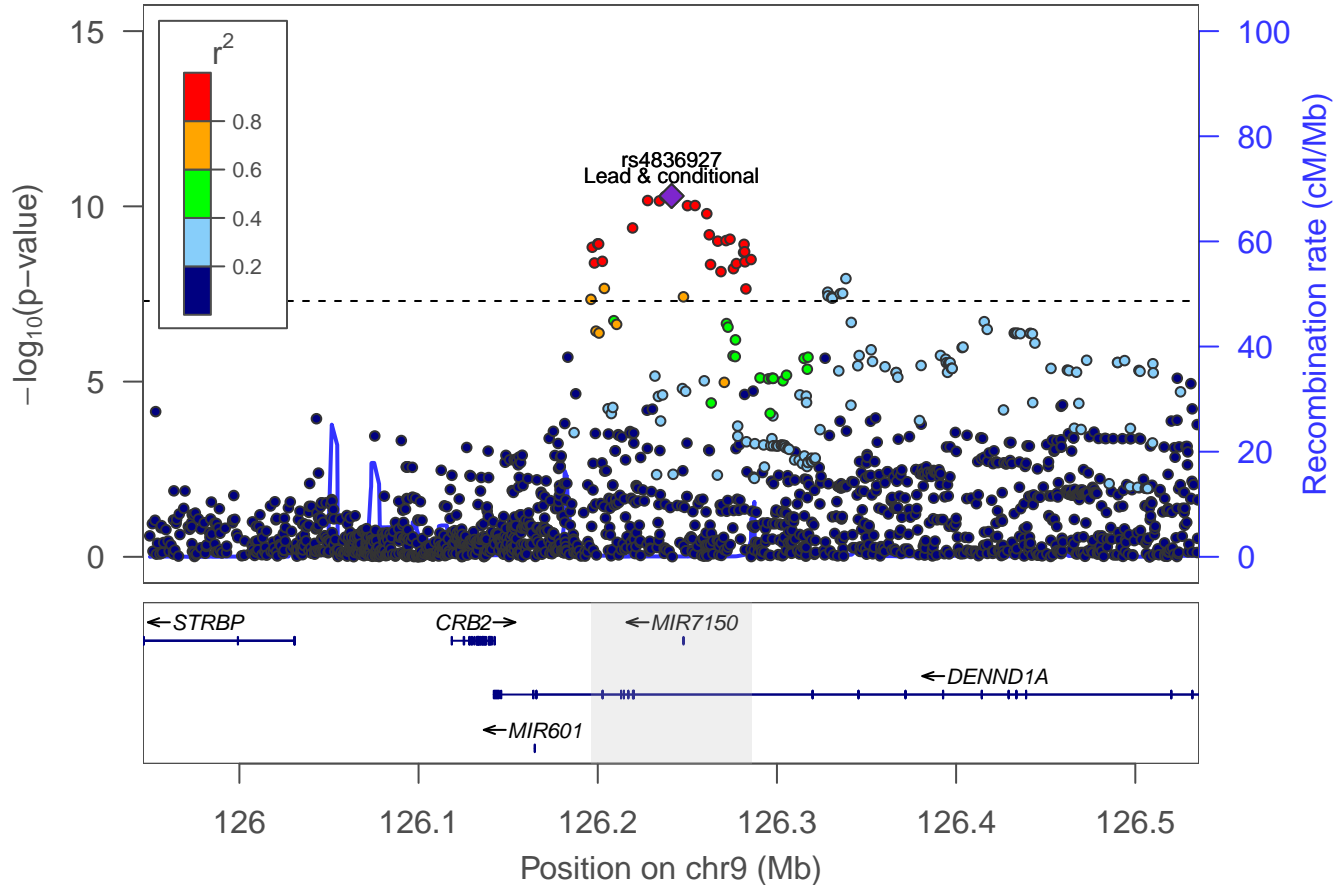

# Adventurousness: locus 85 [chr 9:129.082–129.233Mb]

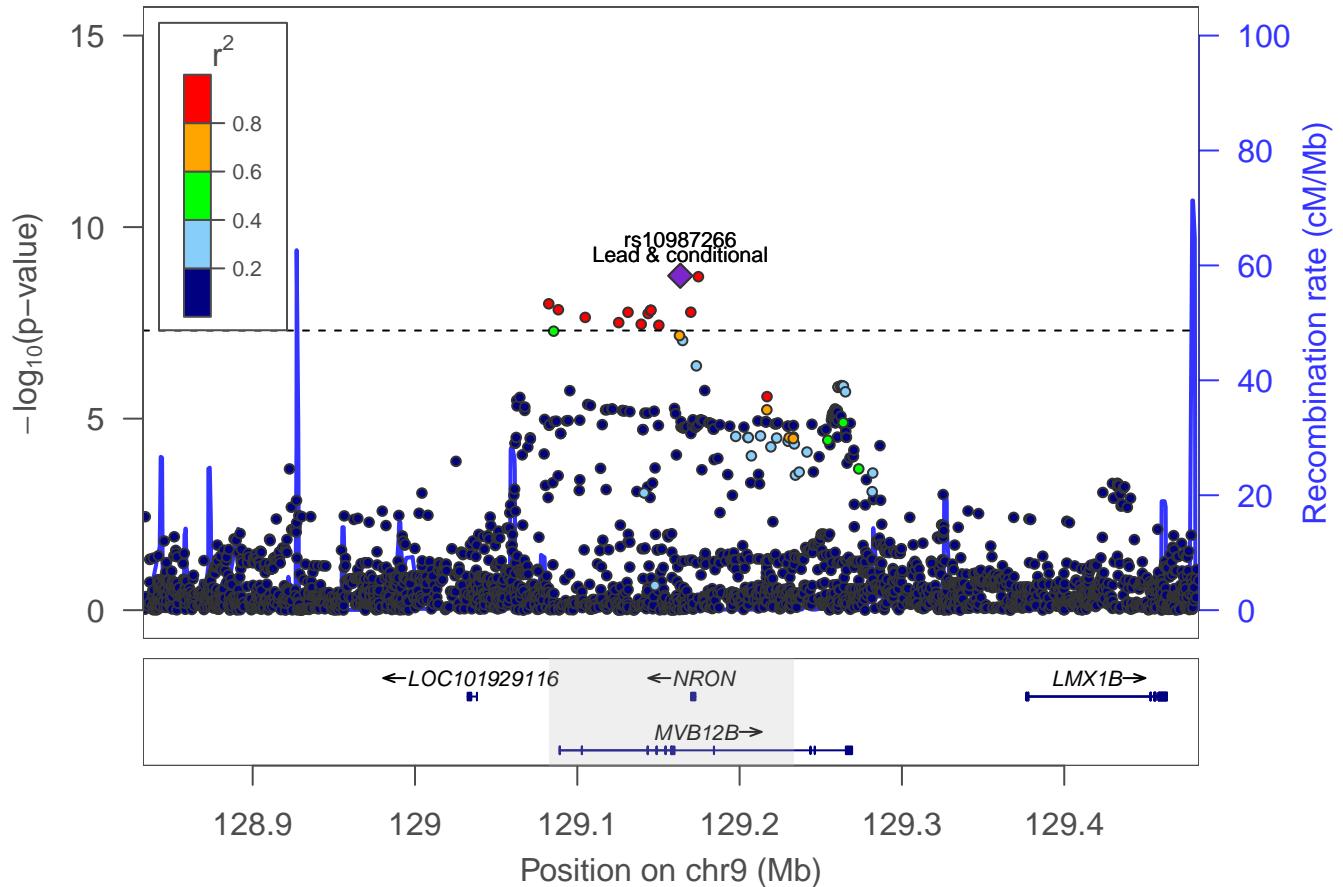

# Adventurousness: locus 86 [chr 10:9.966–10.081Mb]

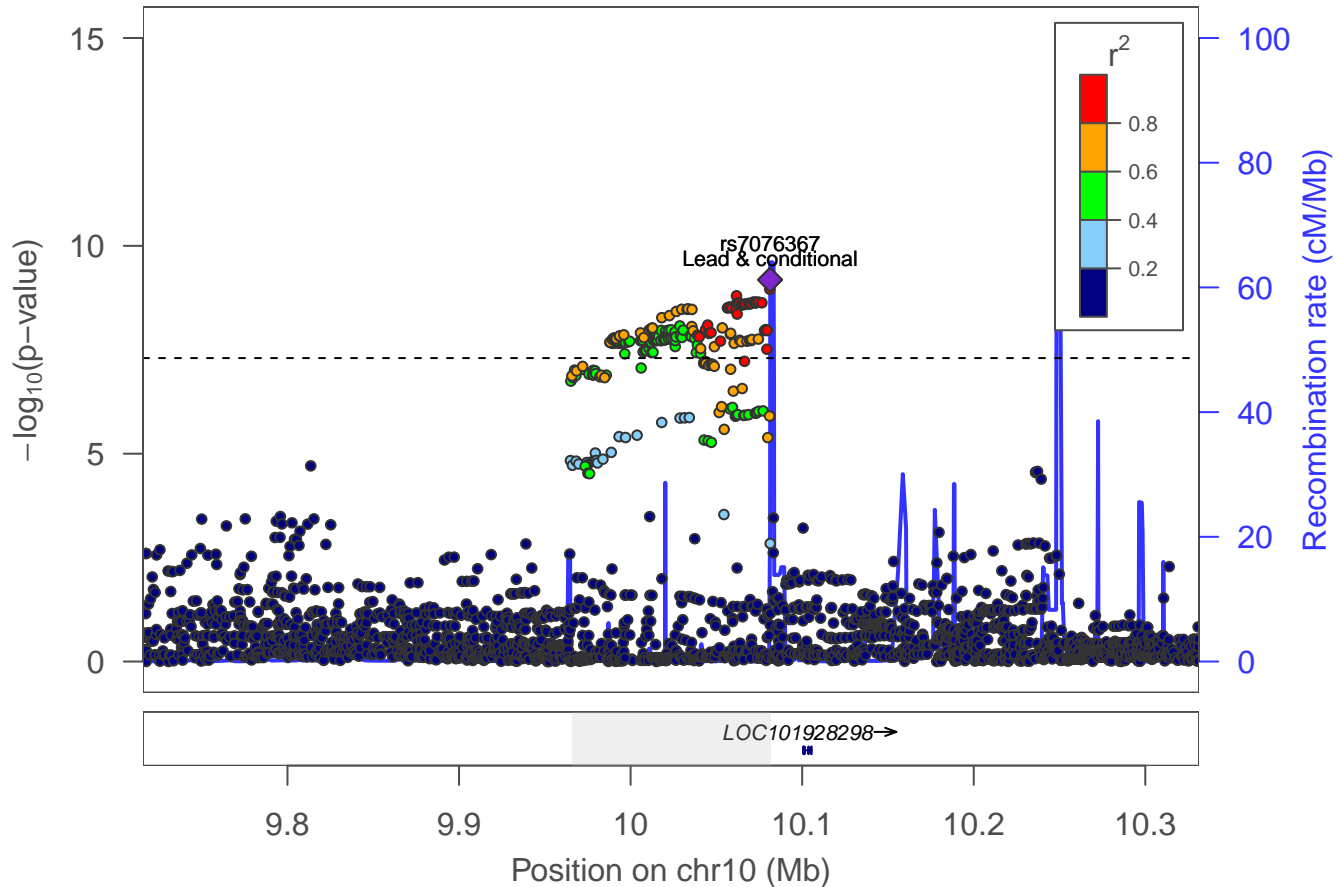

# Adventurousness: locus 87 [chr 10:61.631–61.711Mb]

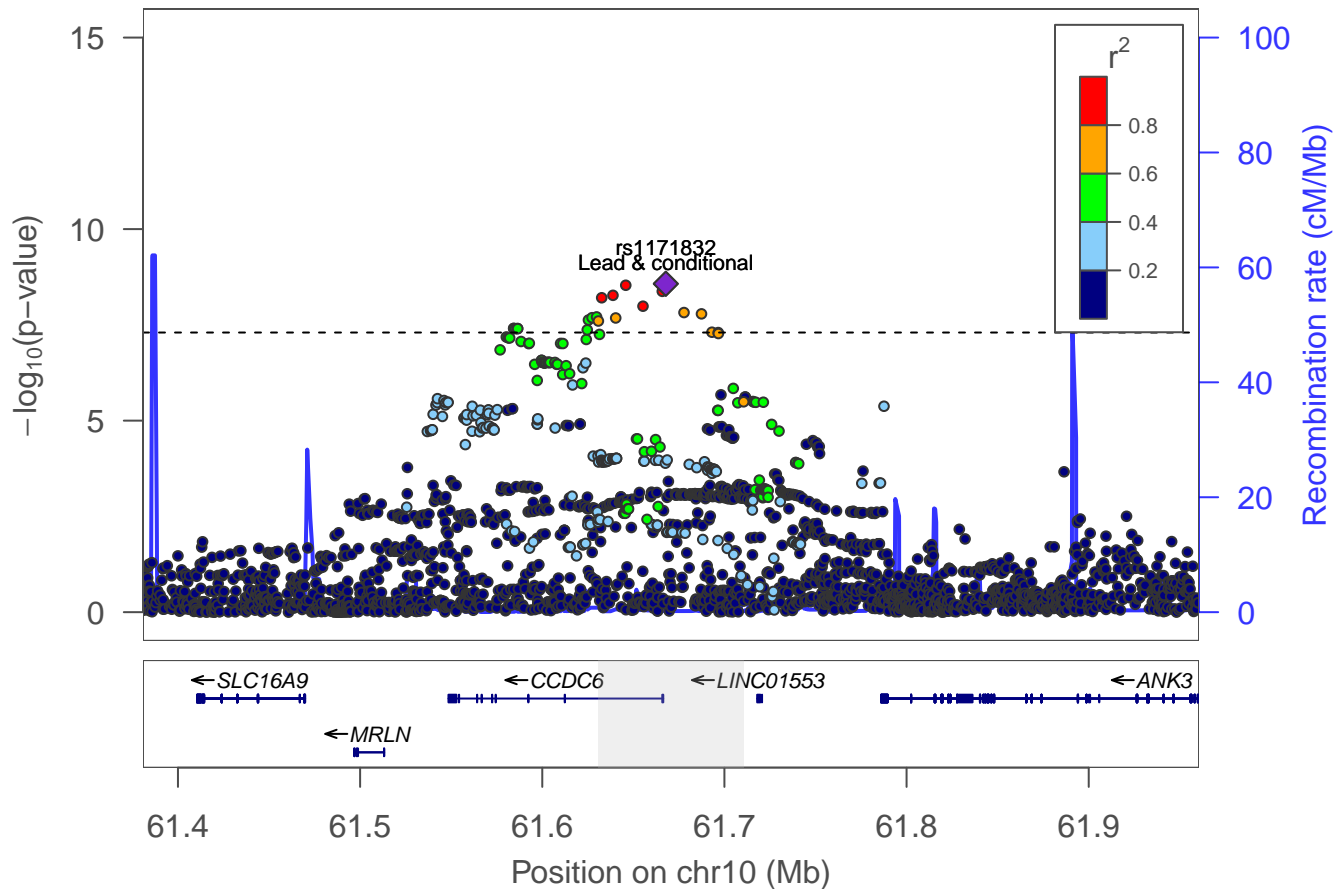

# Adventurousness: locus 88 [chr 10:64.649–64.759Mb]

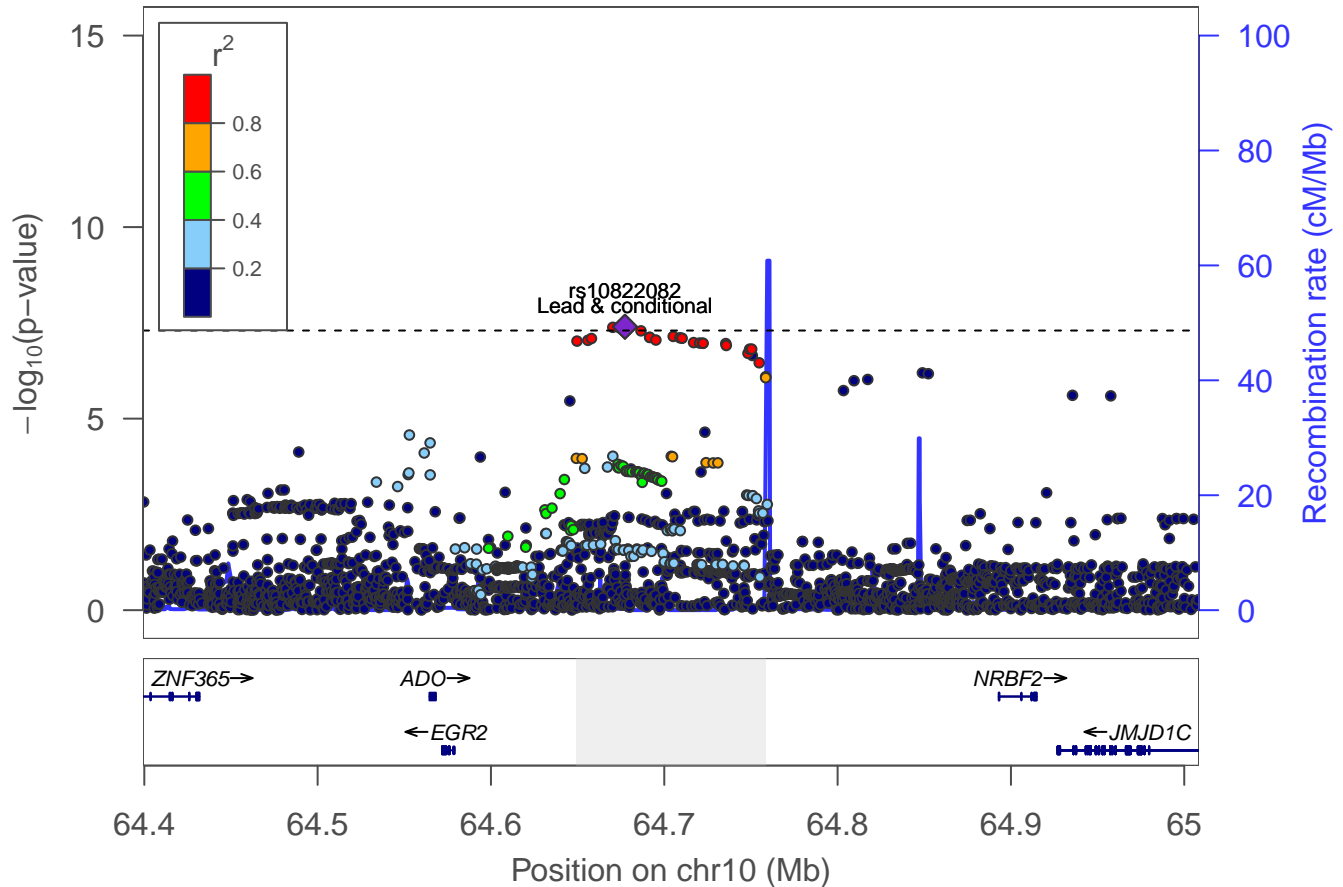

# Adventurousness: Locus 89 [chr 10: 66.652–66.903Mb]

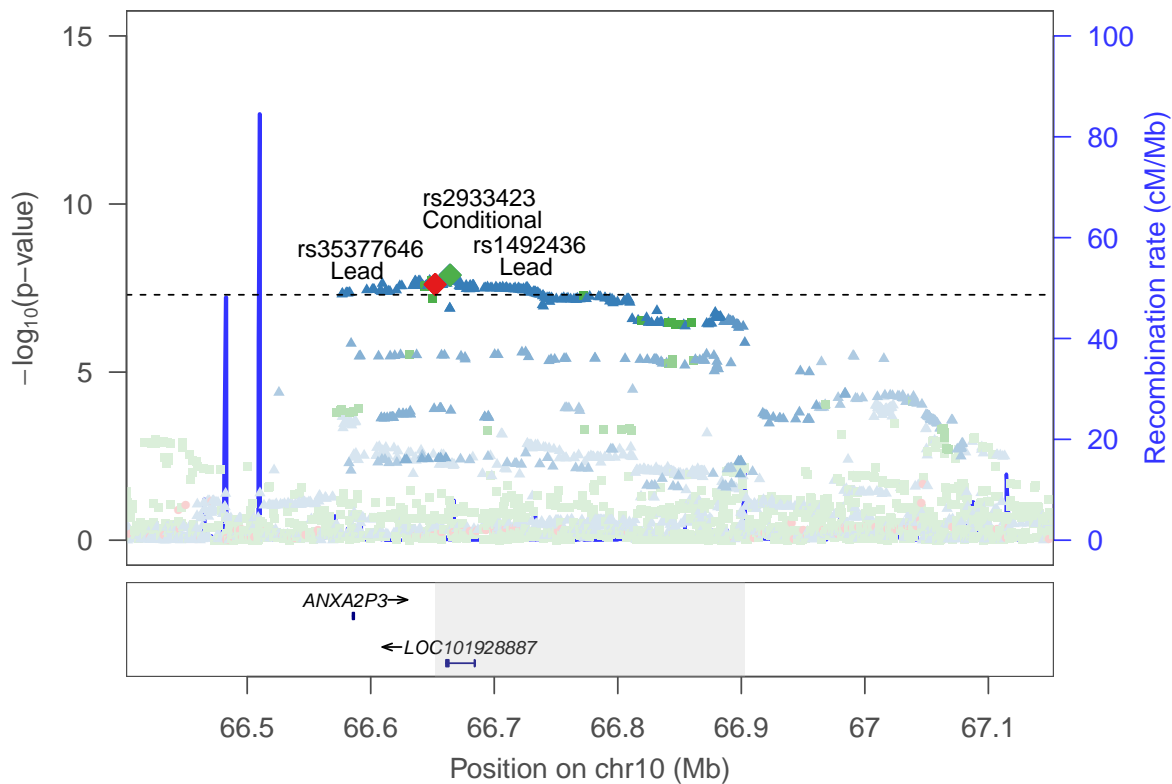

rs2933423   ■  
rs1492436   ▲  
rs35377646   ●

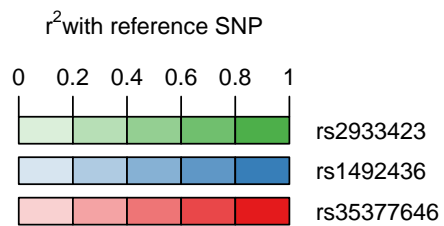



# Adventurousness: locus 90 [chr 10:98.975–99.099Mb]

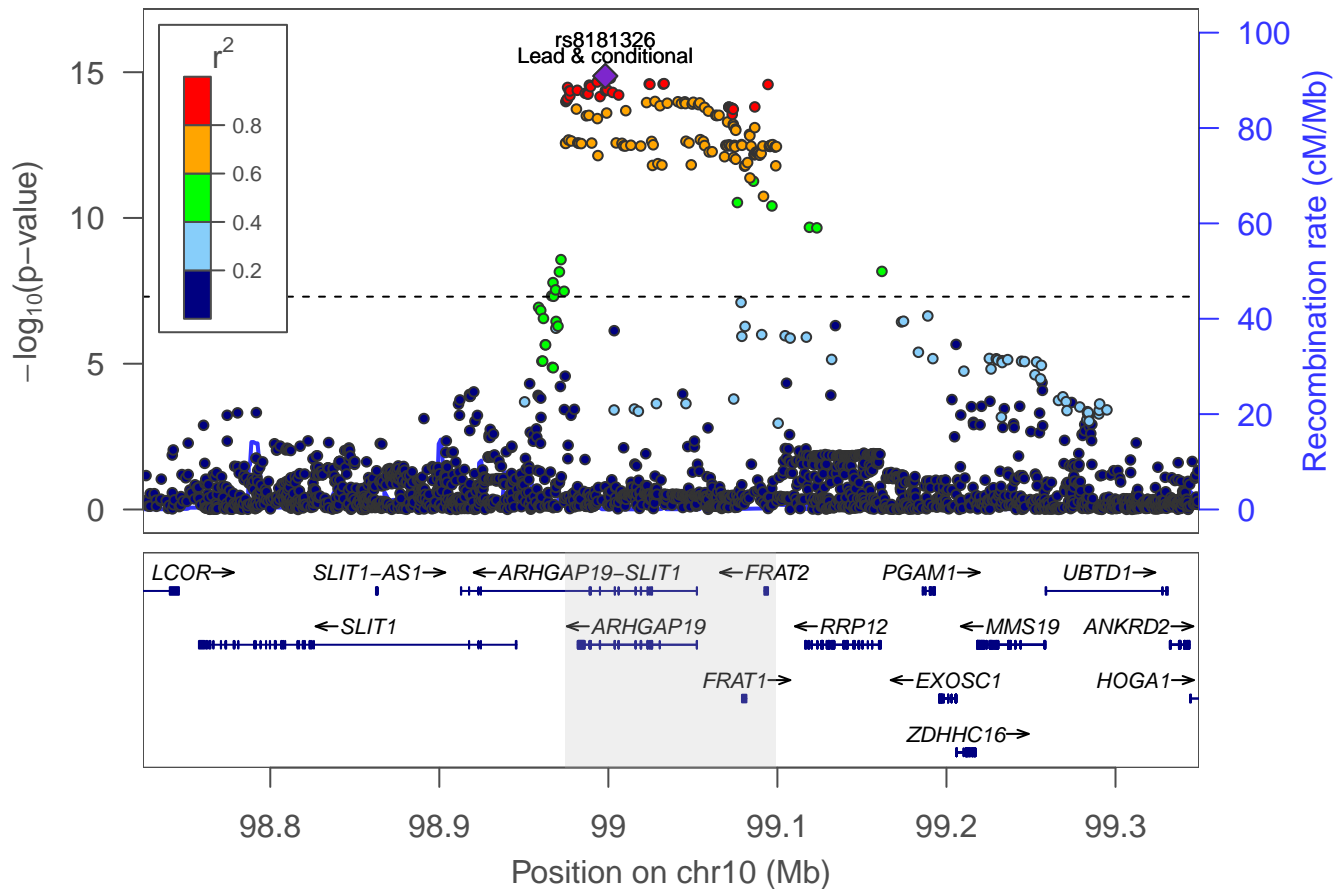

# Adventurousness: locus 91 [chr 11:28.847–29.129Mb]

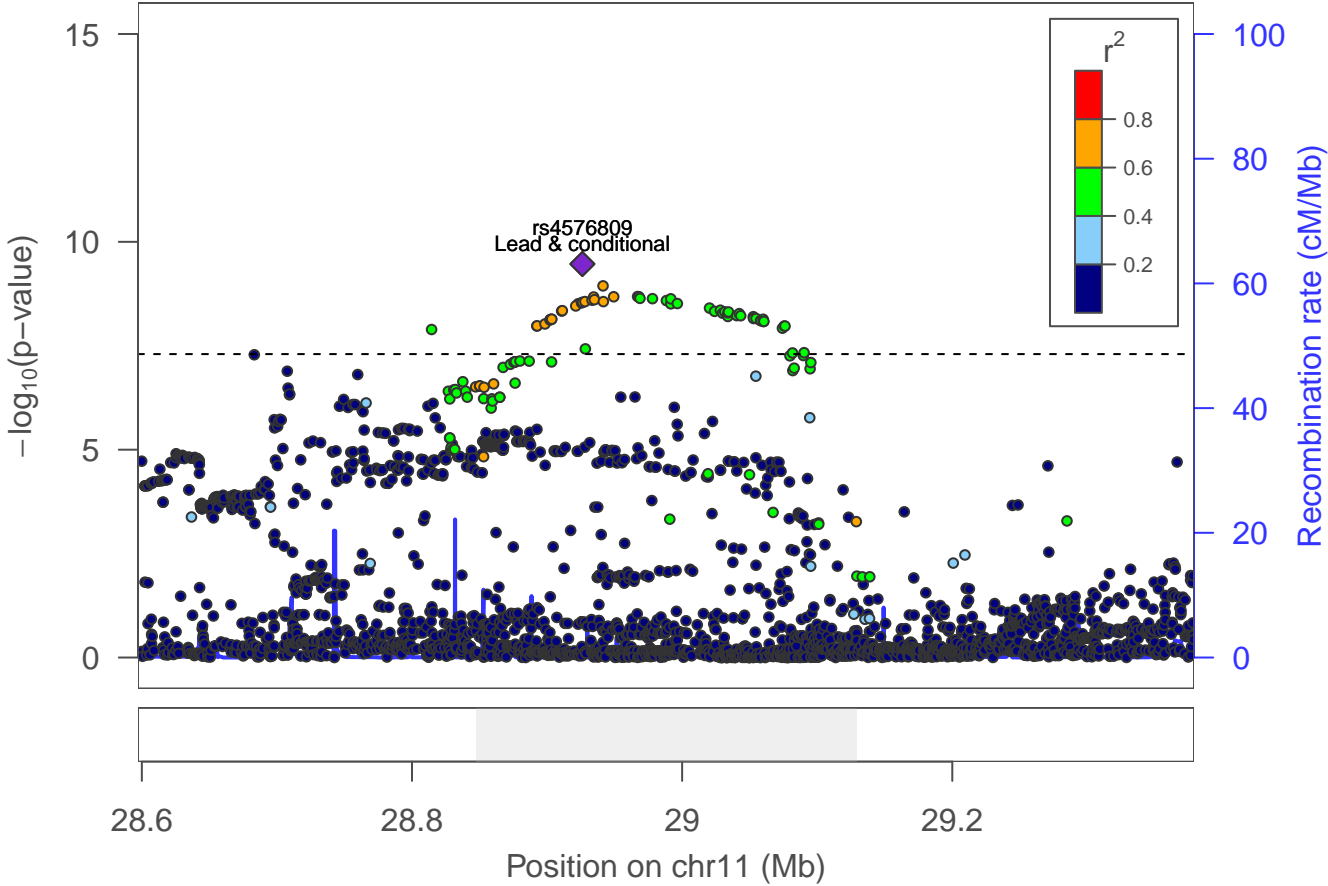

# Adventurousness: Locus 92 [chr 11: 30.442–30.685Mb]

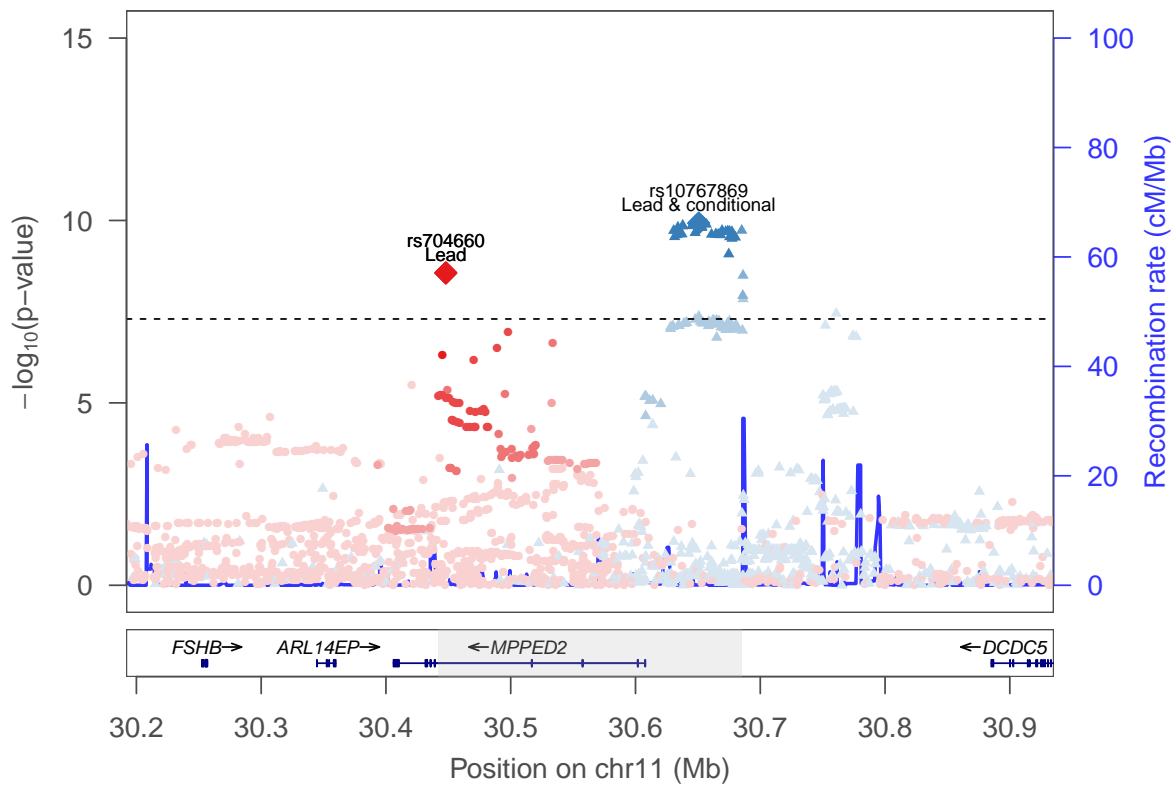

rs10767869 ▲  
rs704660 ●

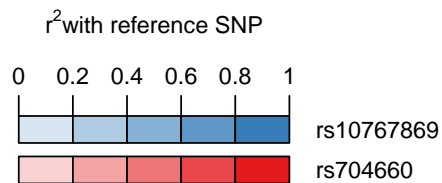

# Adventurousness: locus 93 [chr 11:45.932–46.050Mb]

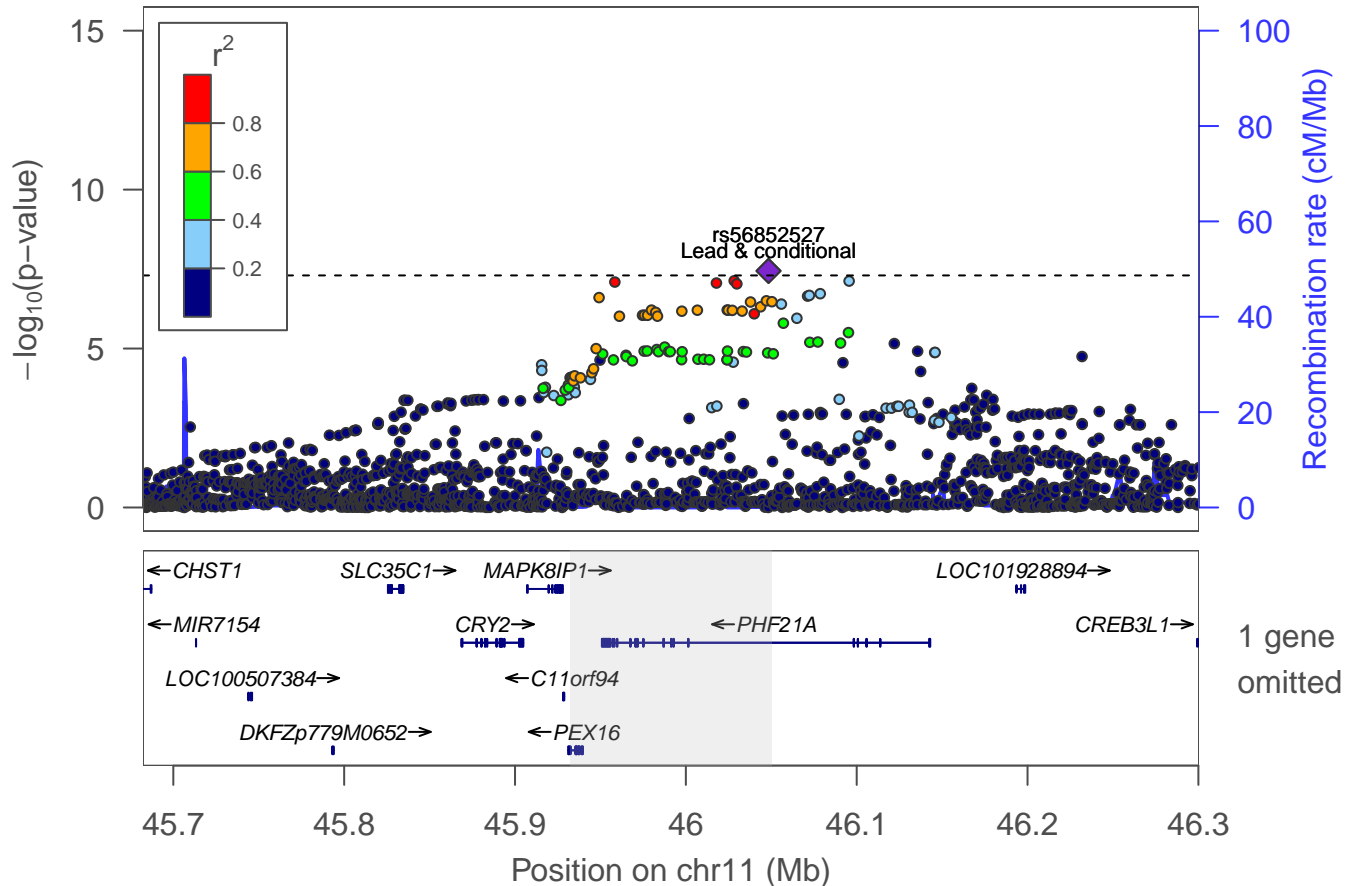

# Adventurousness: locus 94 [chr 11:66.486–66.715Mb]

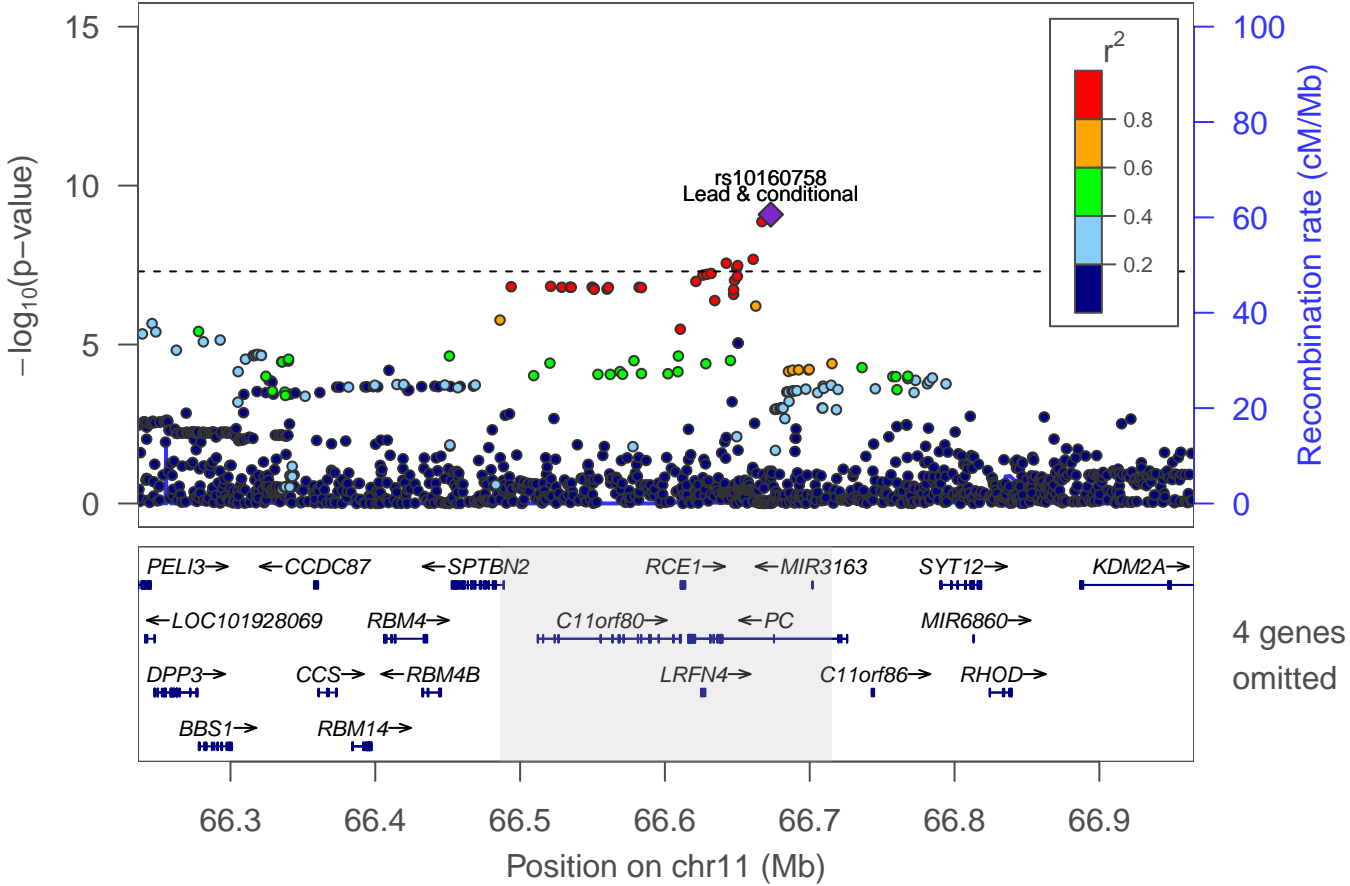

# Adventurousness: locus 95 [chr 11:101.890–101.893Mb]

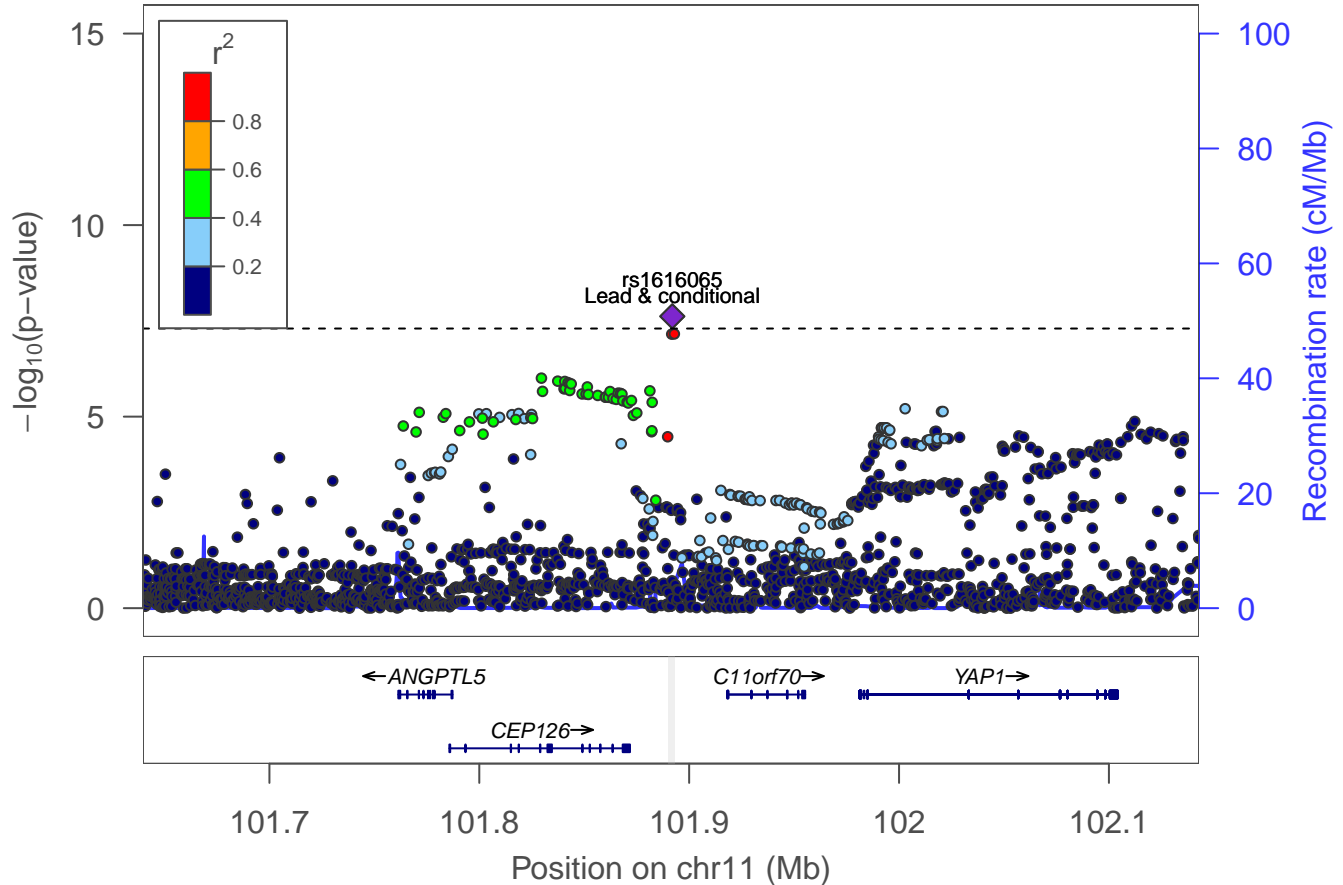

# Adventurousness: locus 96 [chr 11:116.131–116.139Mb]

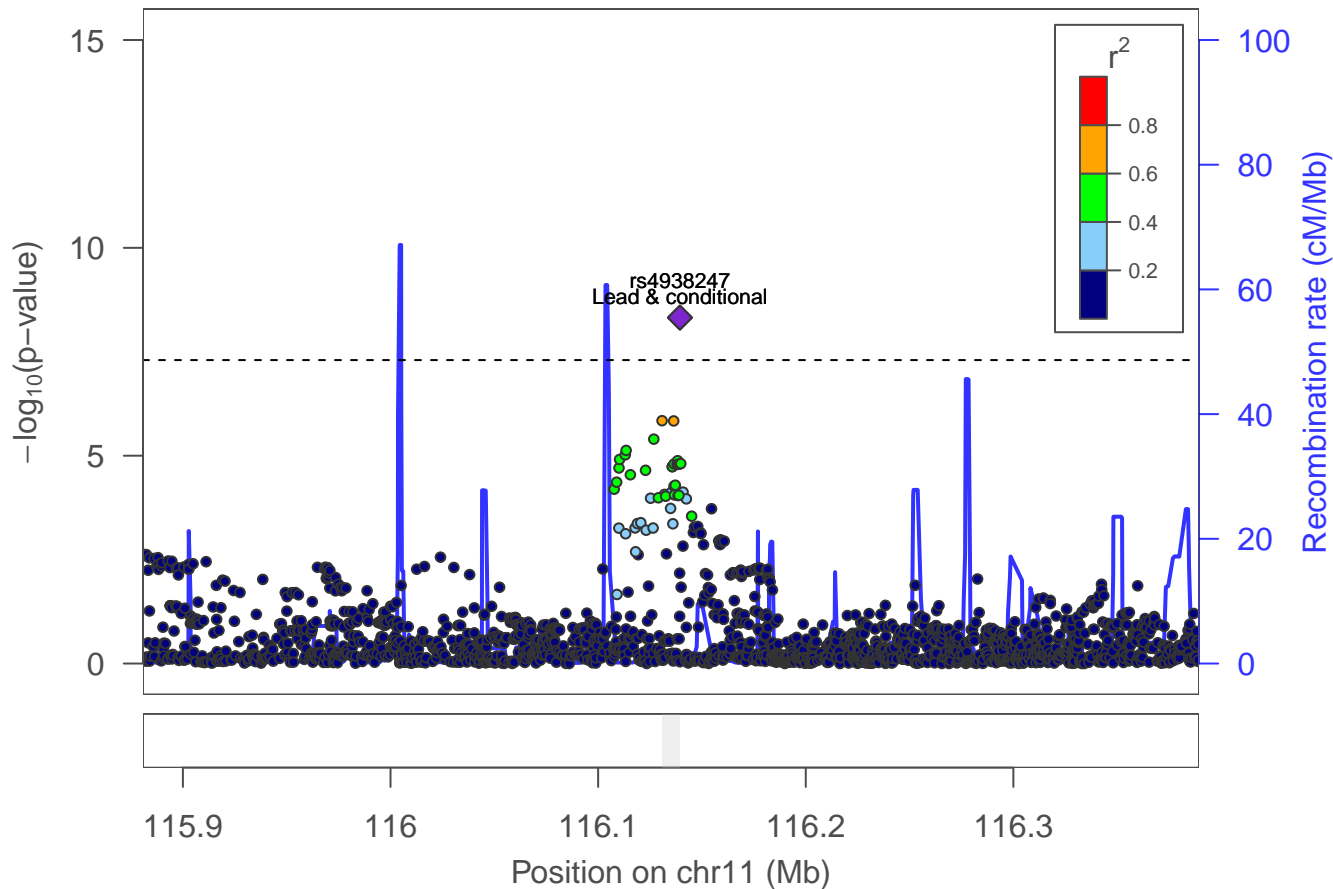

# Adventurousness: locus 97 [chr 12:2.293–2.414Mb]

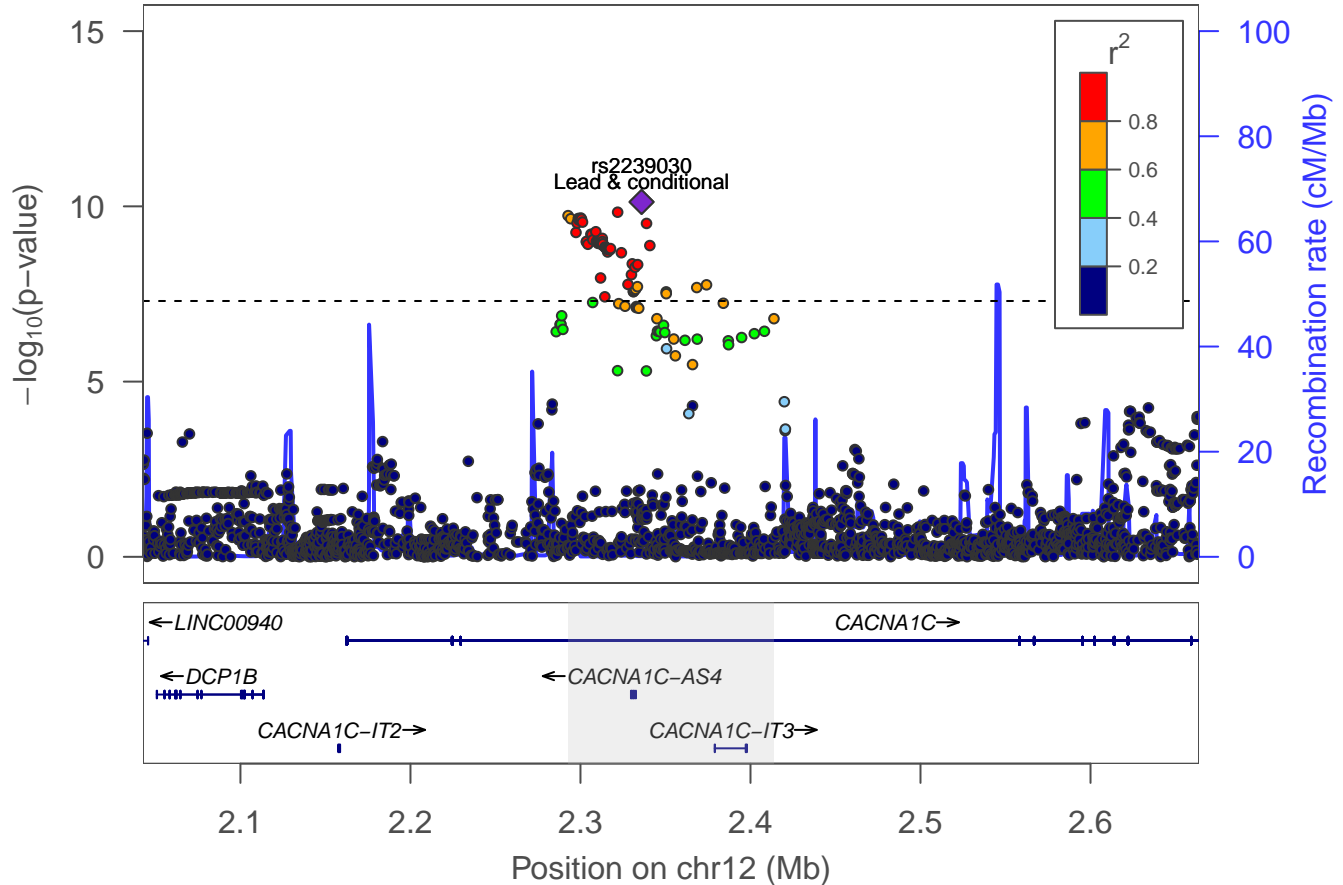



# Adventurousness: locus 98 [chr 12:13.732–13.811Mb]

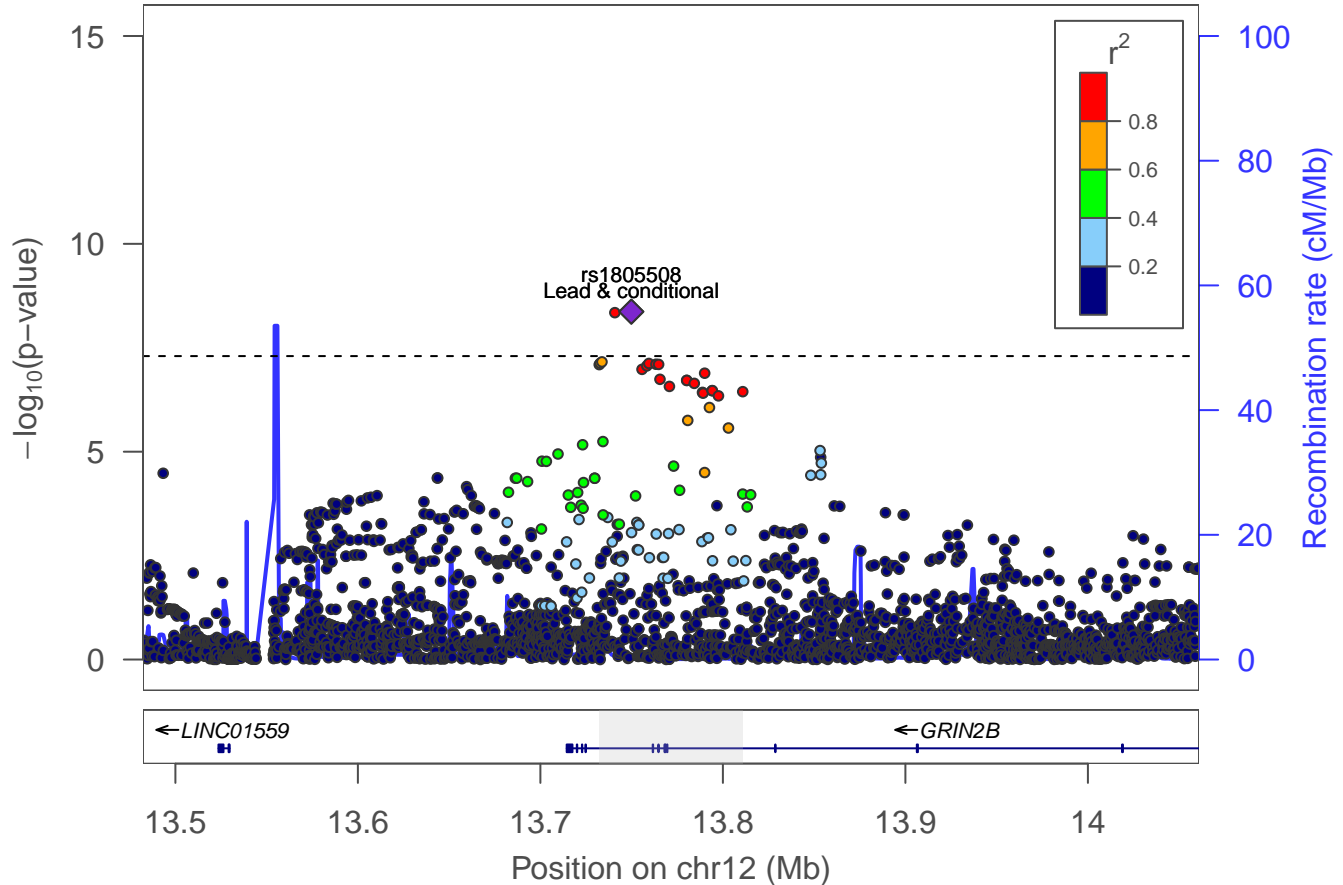

# Adventurousness: locus 99 [chr 12:24.702–24.756Mb]

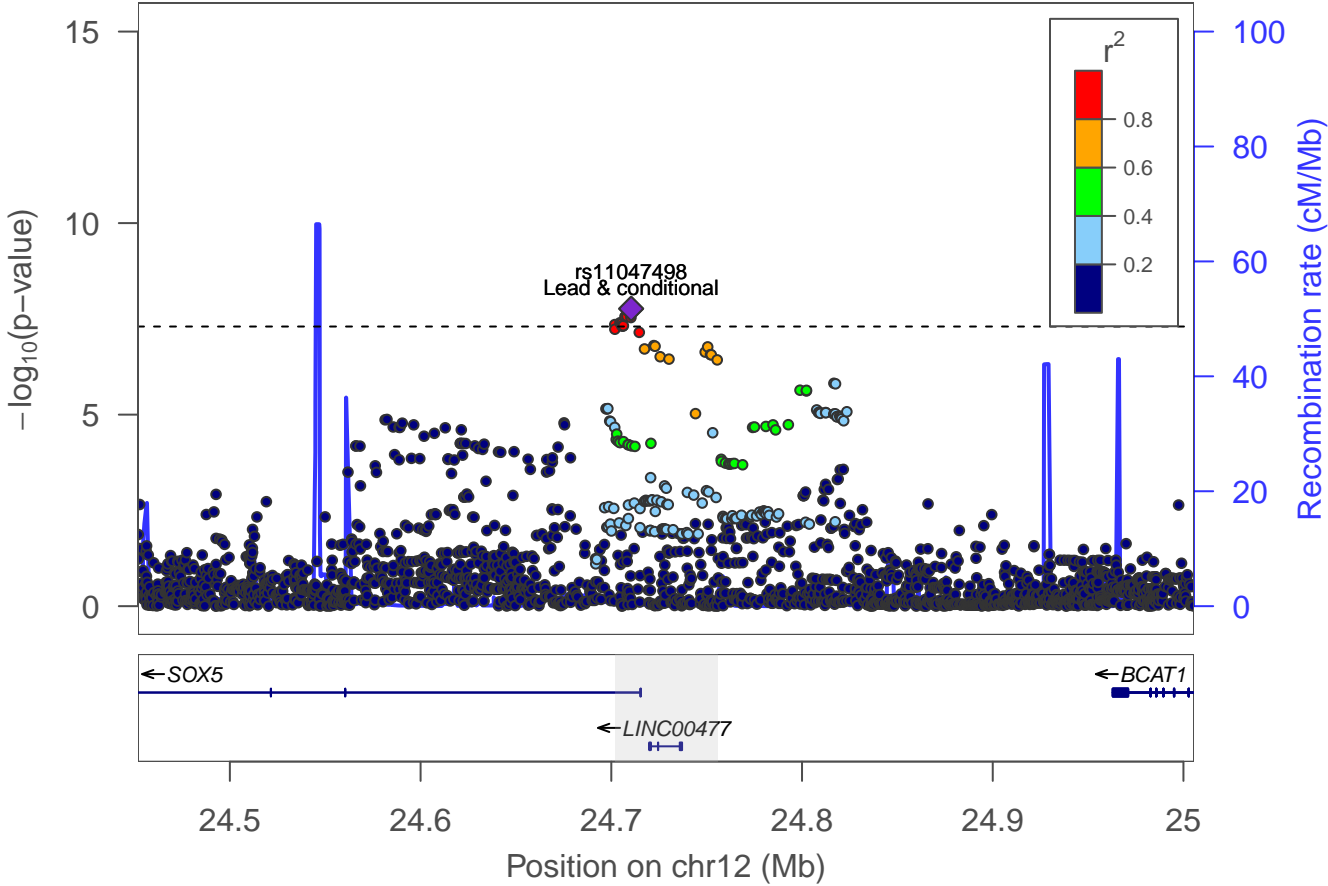

# Adventurousness: locus 100 [chr 12:60.281–60.470Mb]

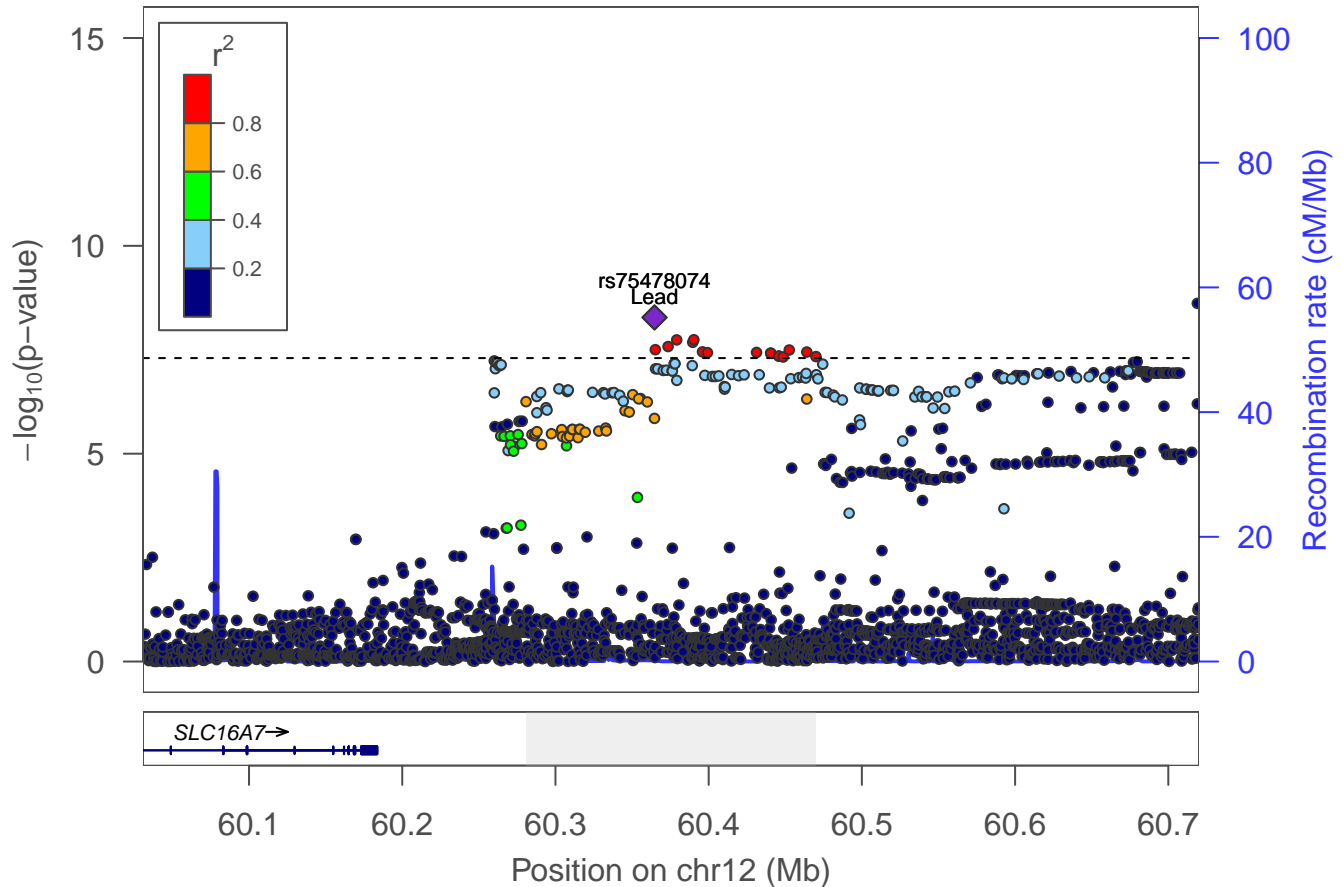

# Adventurousness: locus 101 [chr 12:60.862–61.267Mb]

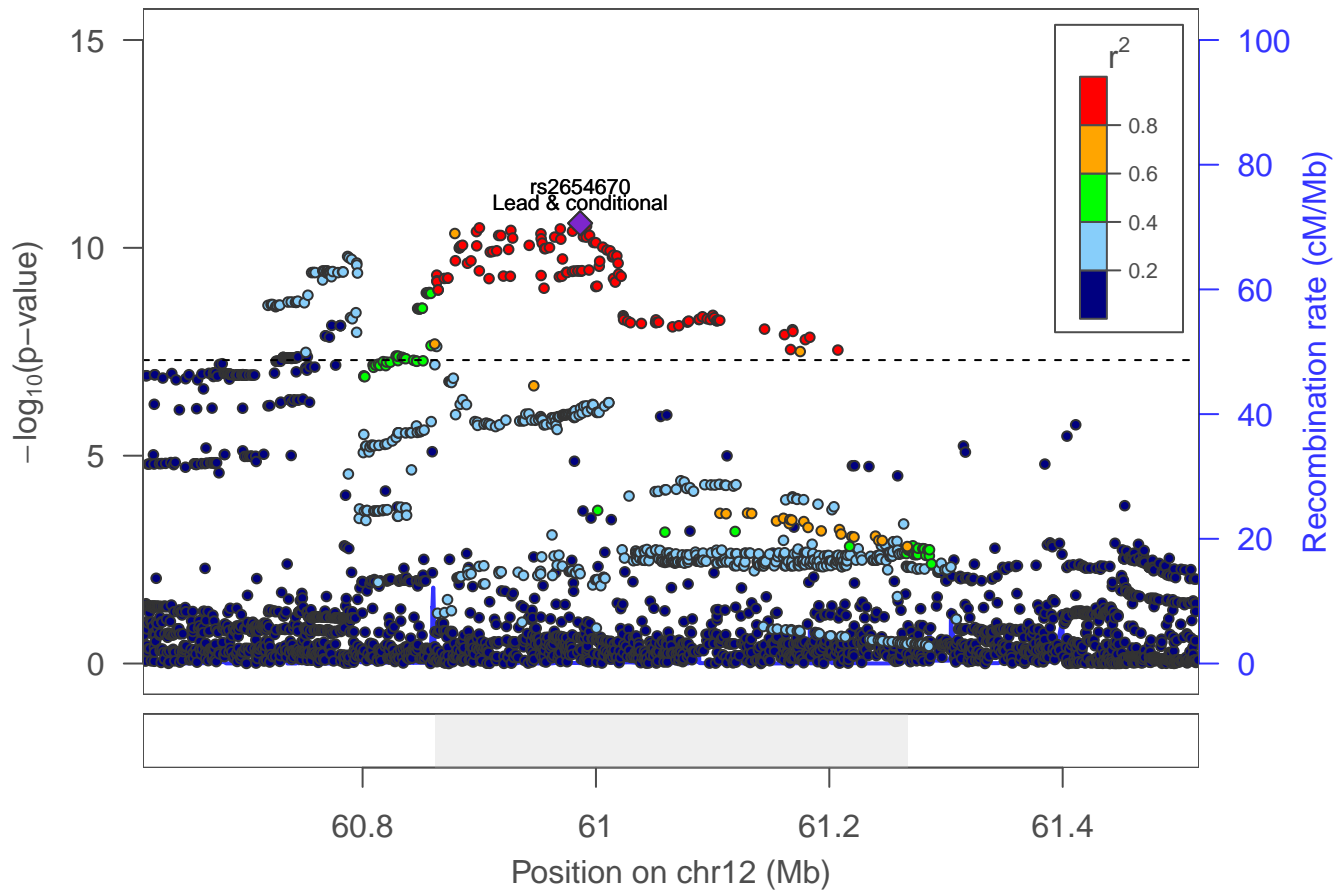

# Adventurousness: locus 102 [chr 12:97.548–97.610Mb]

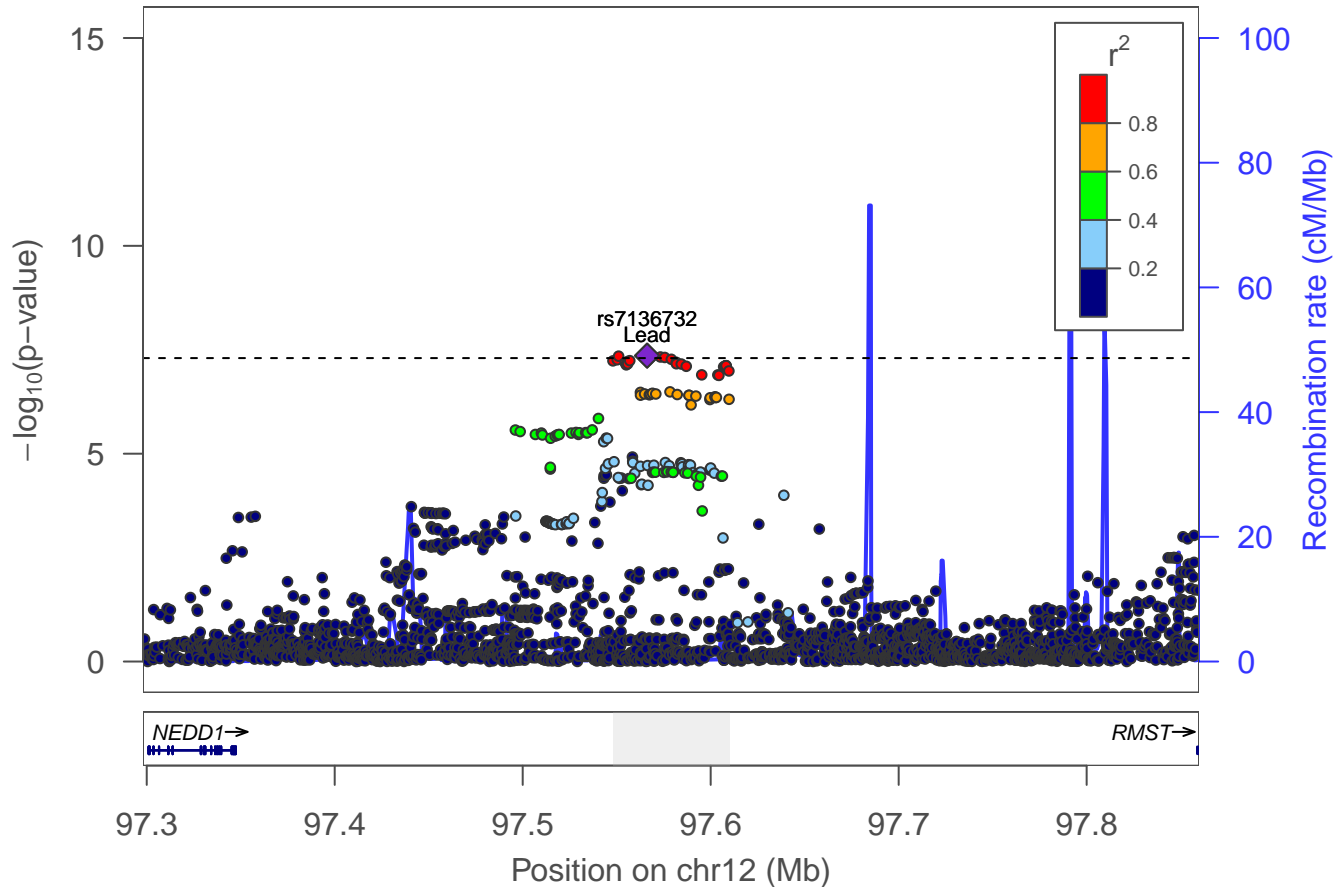

# Adventurousness: locus 103 [chr 12:102.395–102.867Mb]

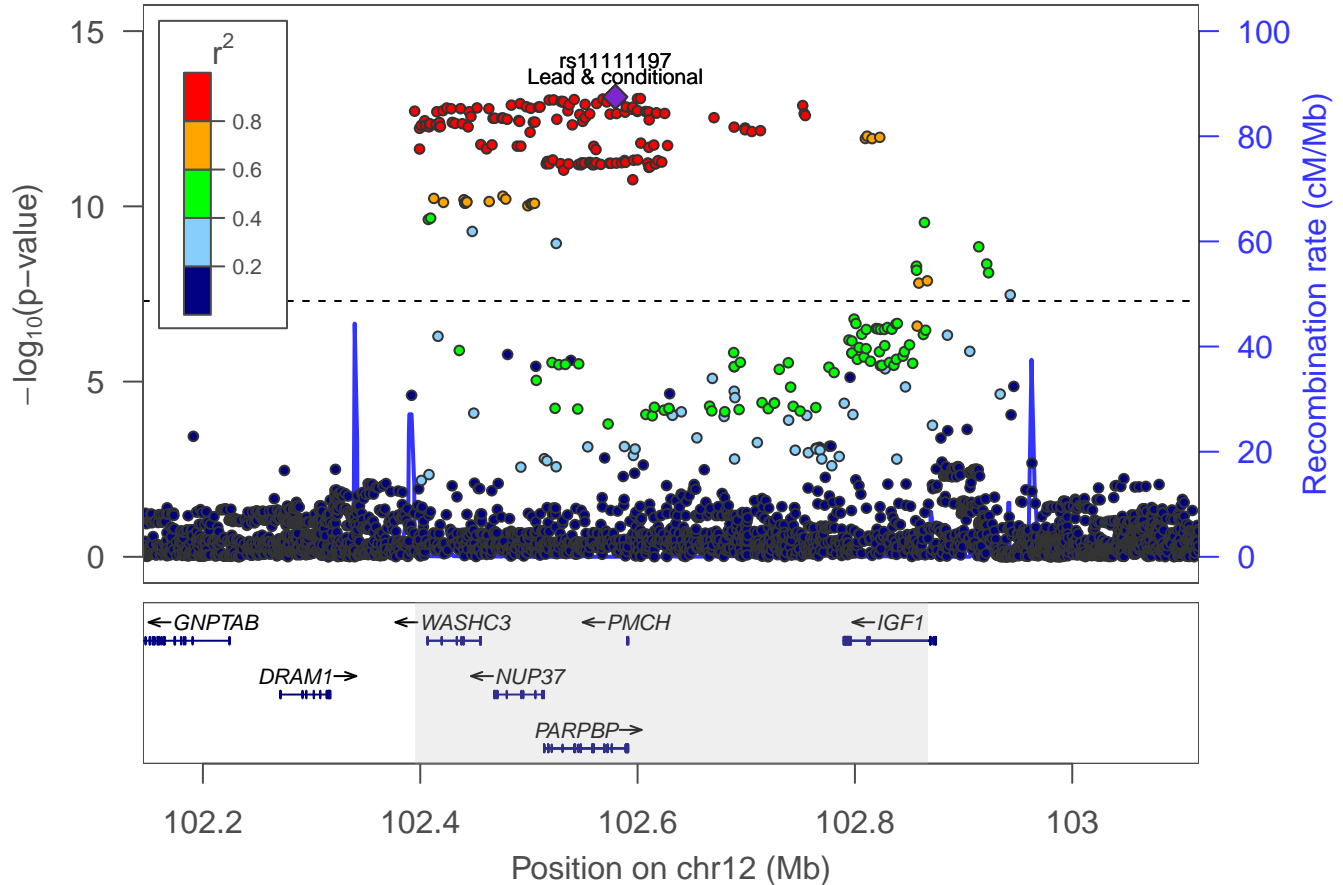

# Adventurousness: locus 104 [chr 13:54.067–54.076Mb]

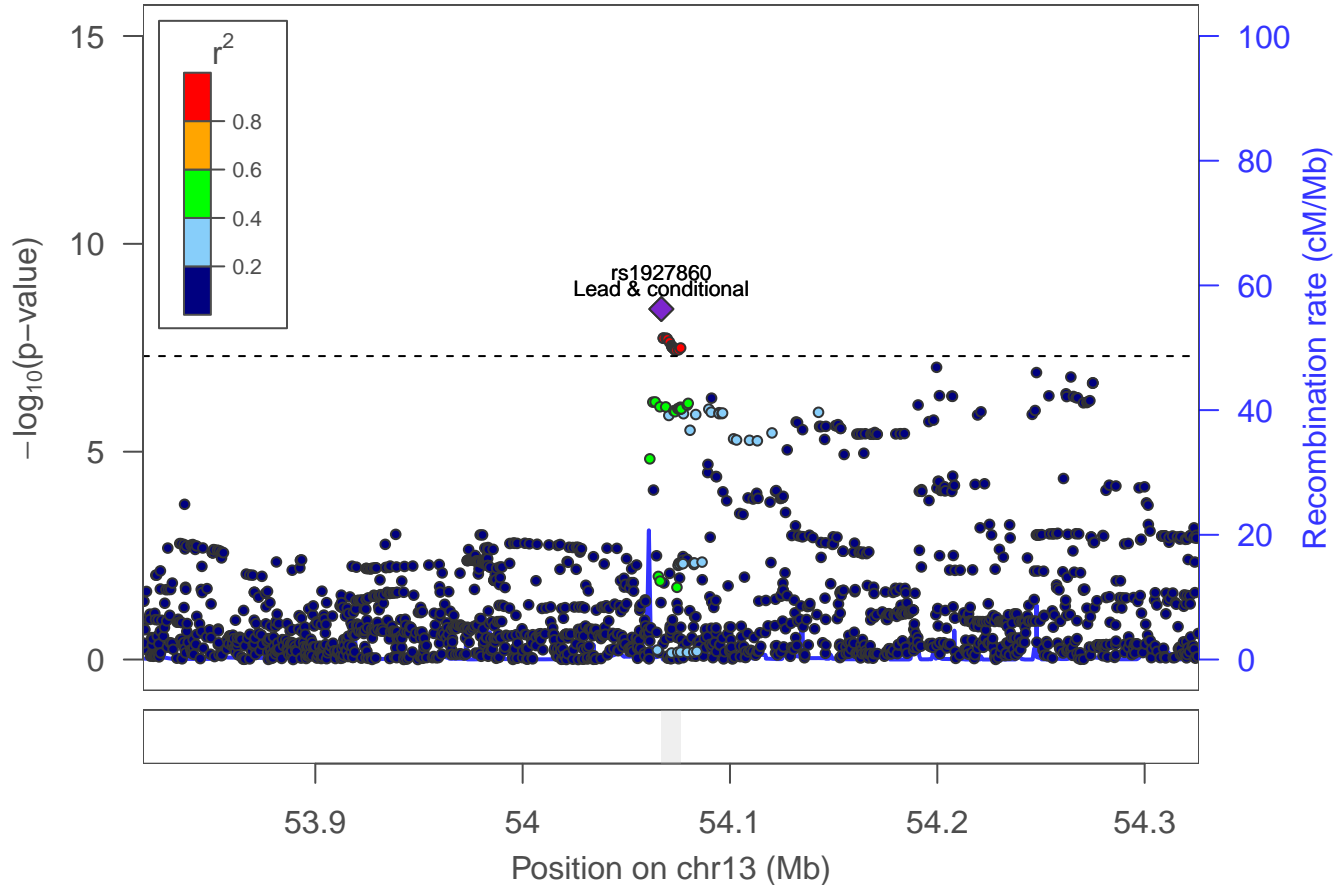

# Adventurousness: locus 105 [chr 13:80.912–80.930Mb]

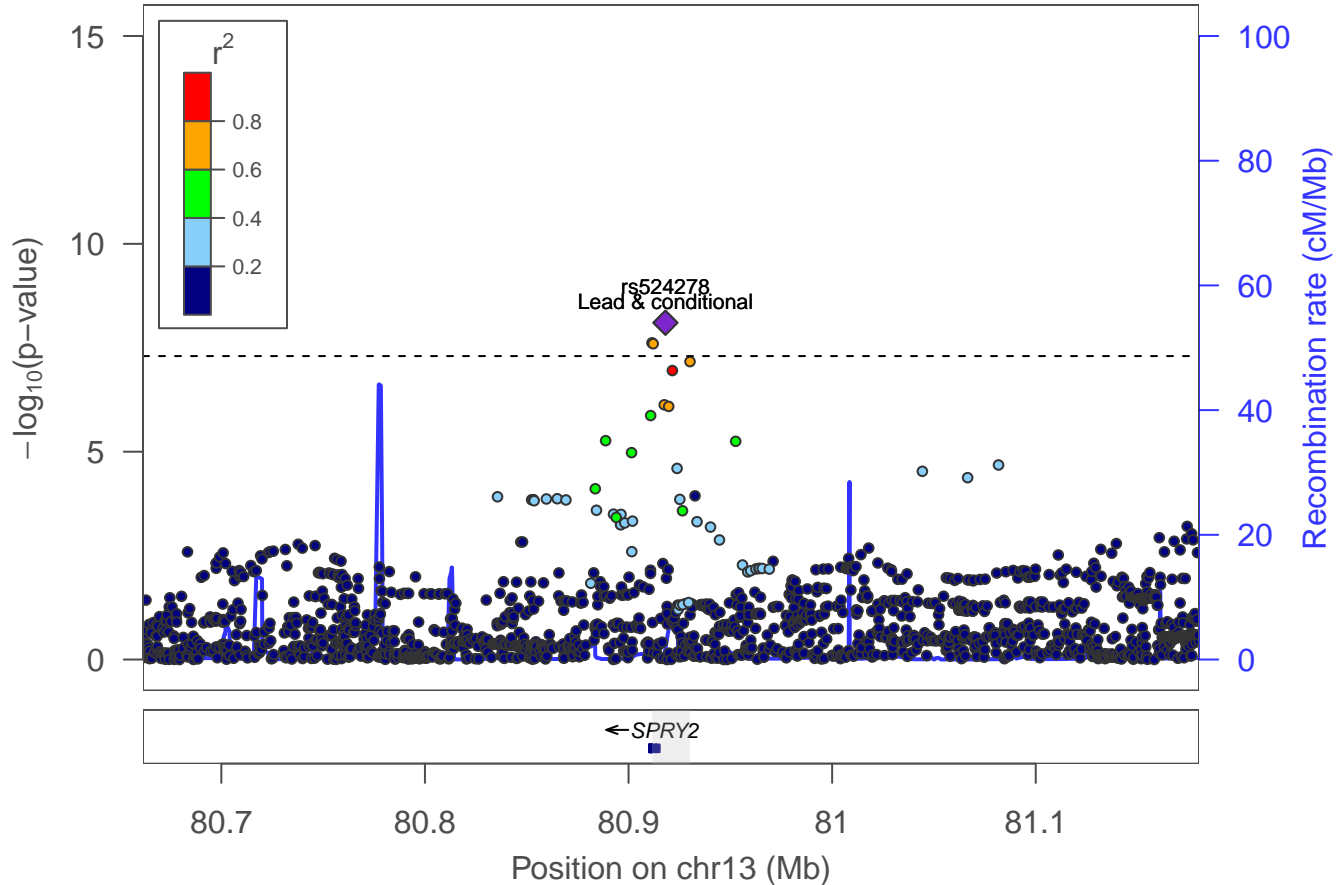



# Adventurousness: locus 106 [chr 13:99.099–99.101Mb]

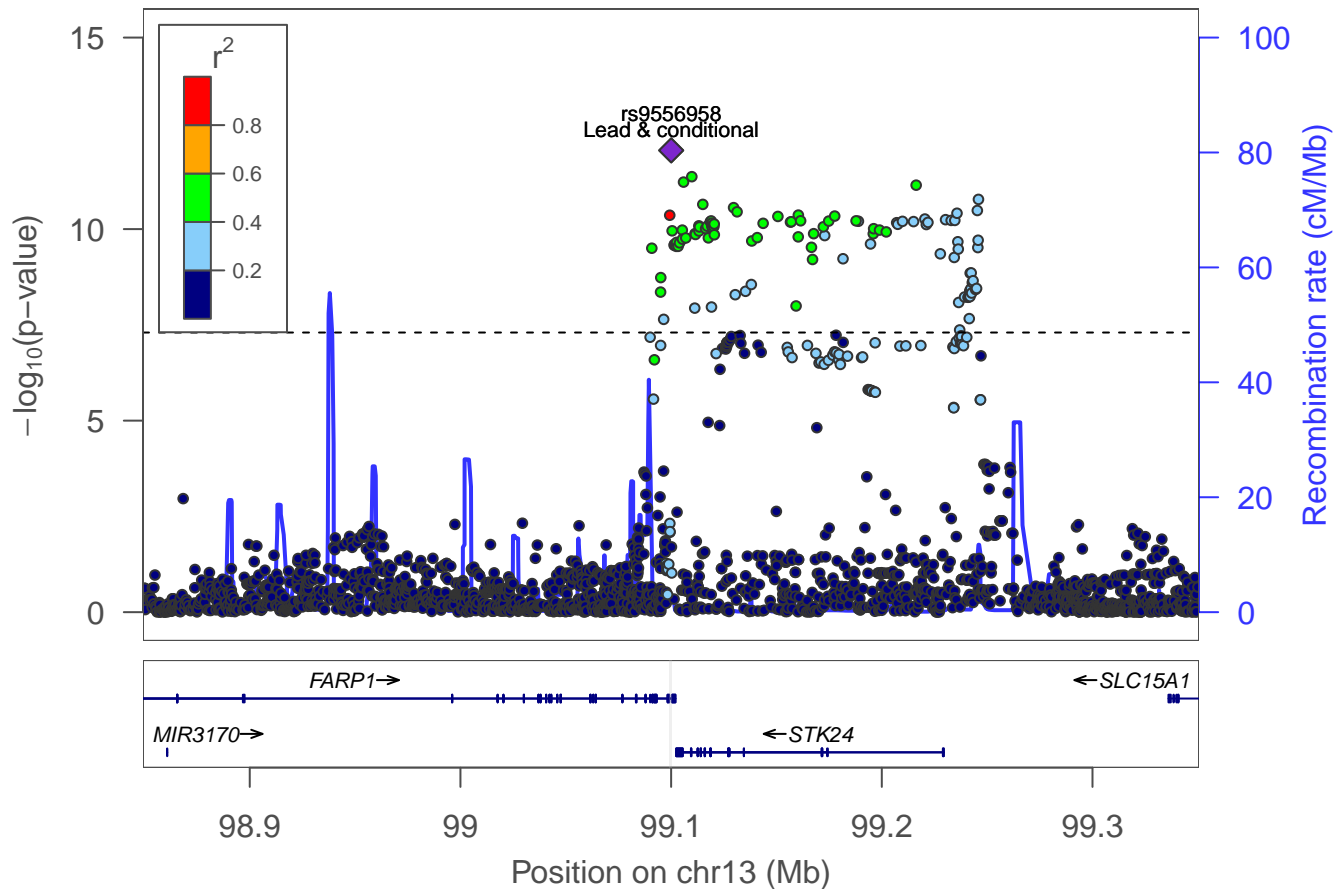

# Adventurousness: locus 107 [chr 14:42.721–42.721Mb]

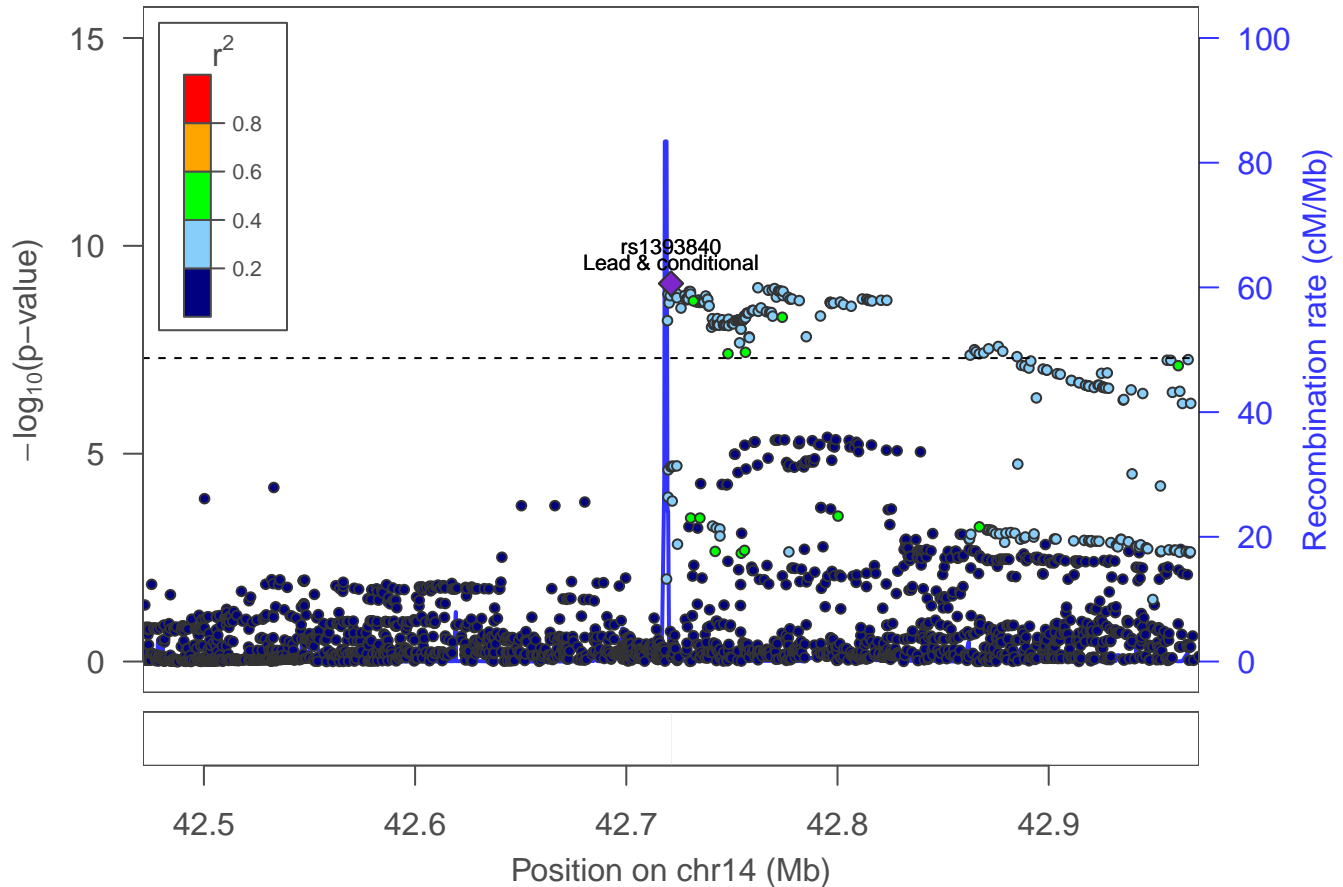

# Adventurousness: locus 108 [chr 14:72.710–72.850Mb]

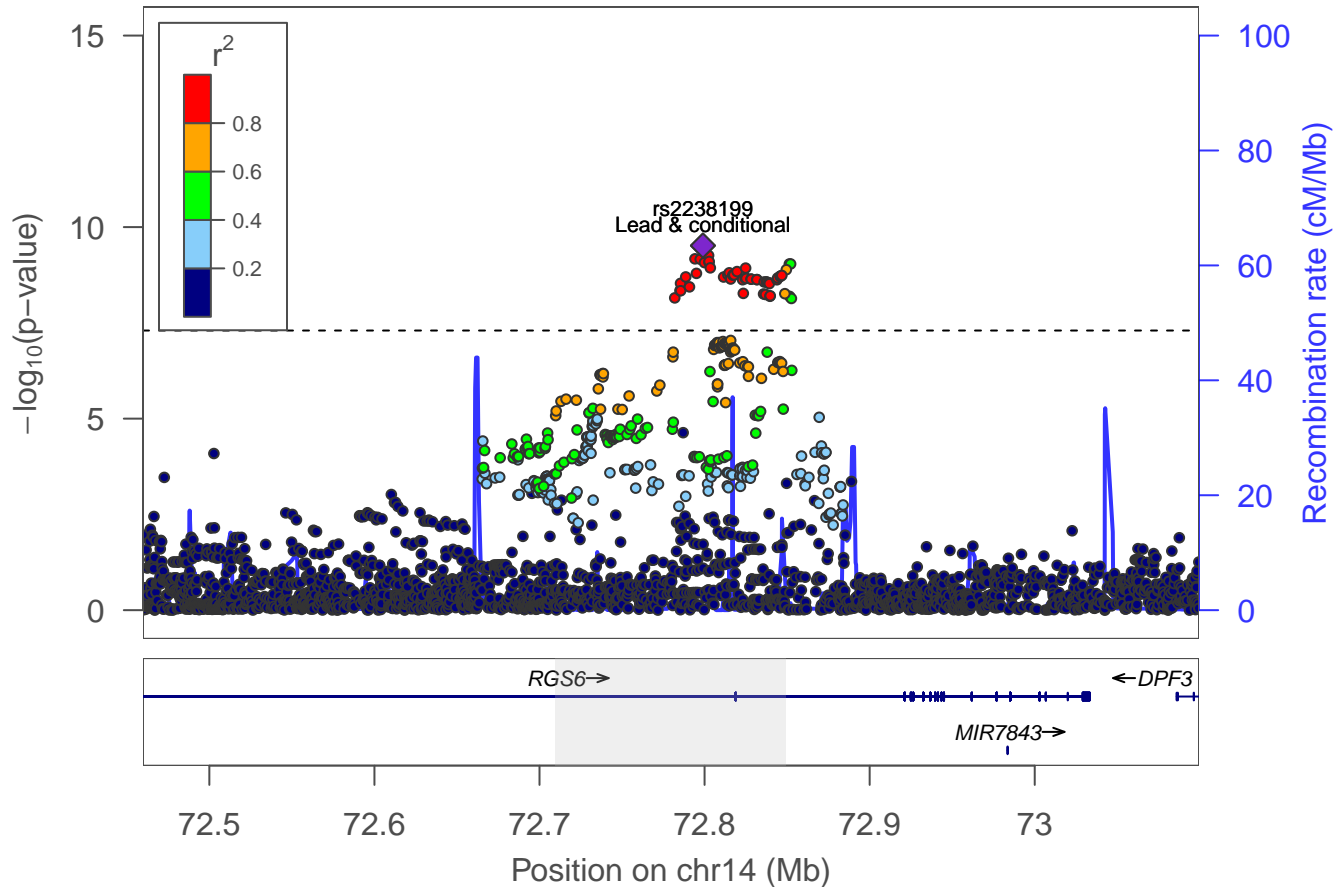

# Adventurousness: locus 109 [chr 14:98.533–98.641Mb]

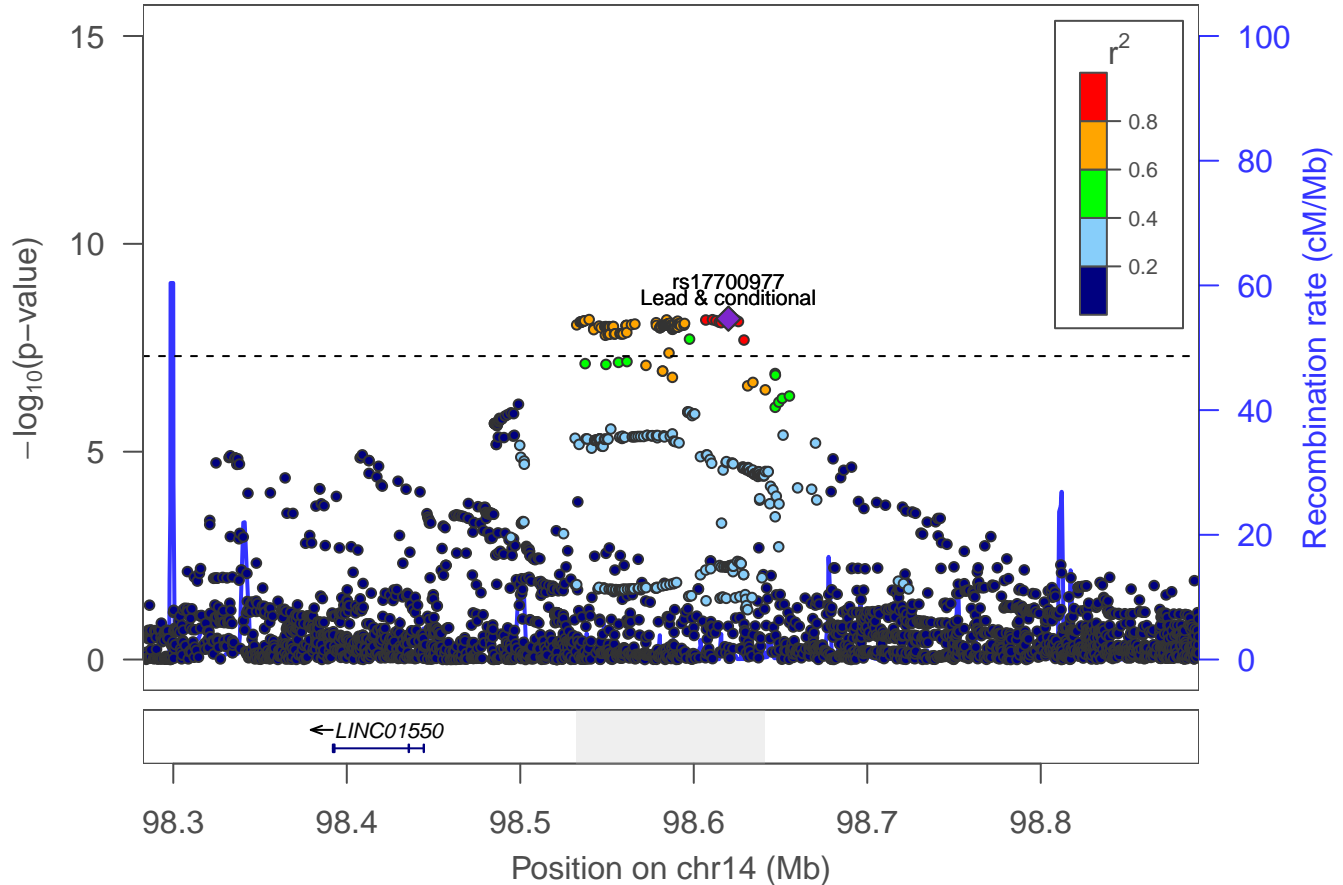

# Adventurousness: locus 110 [chr 14:99.708–99.719Mb]

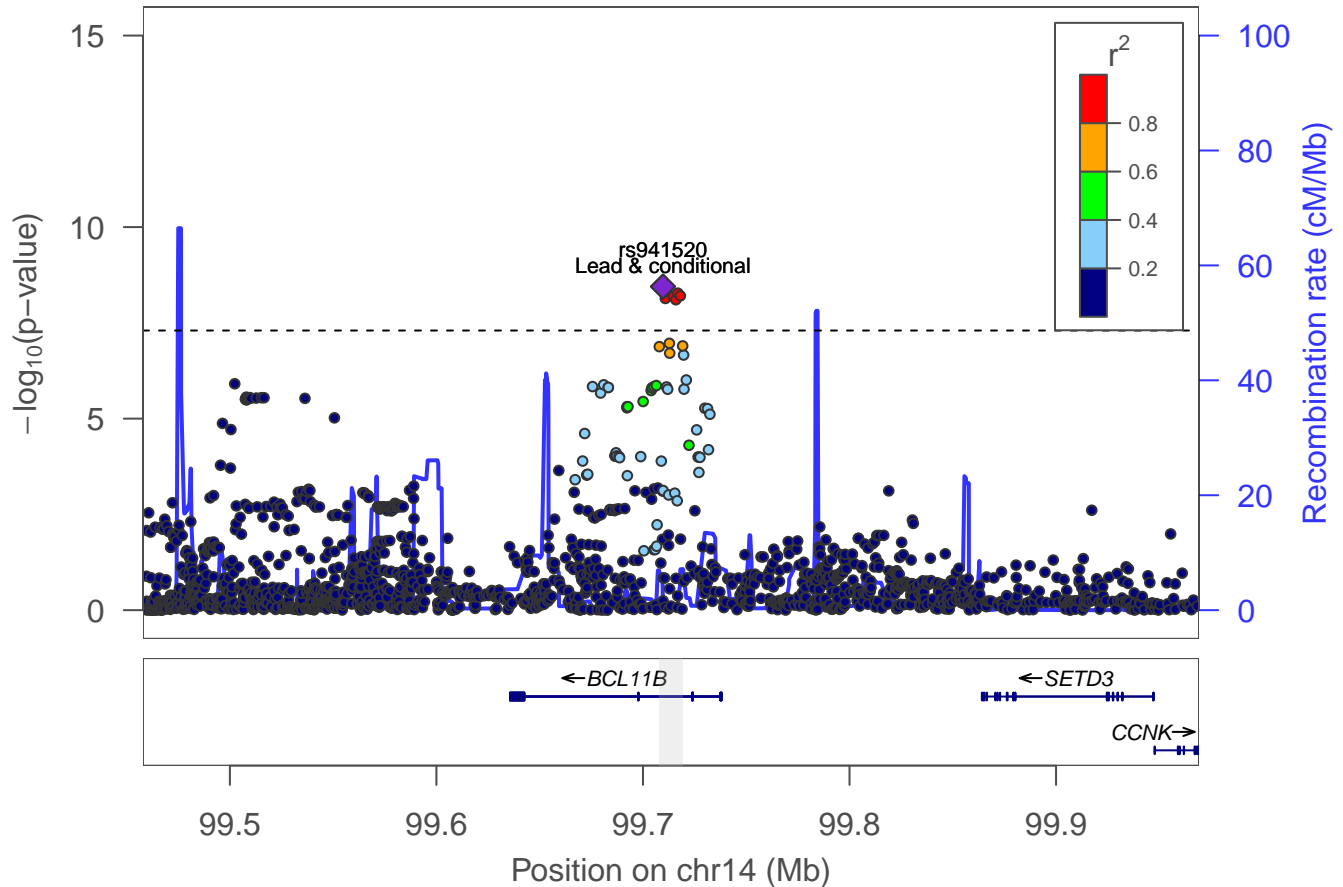

# Adventurousness: locus 111 [chr 15:47.896–47.981Mb]

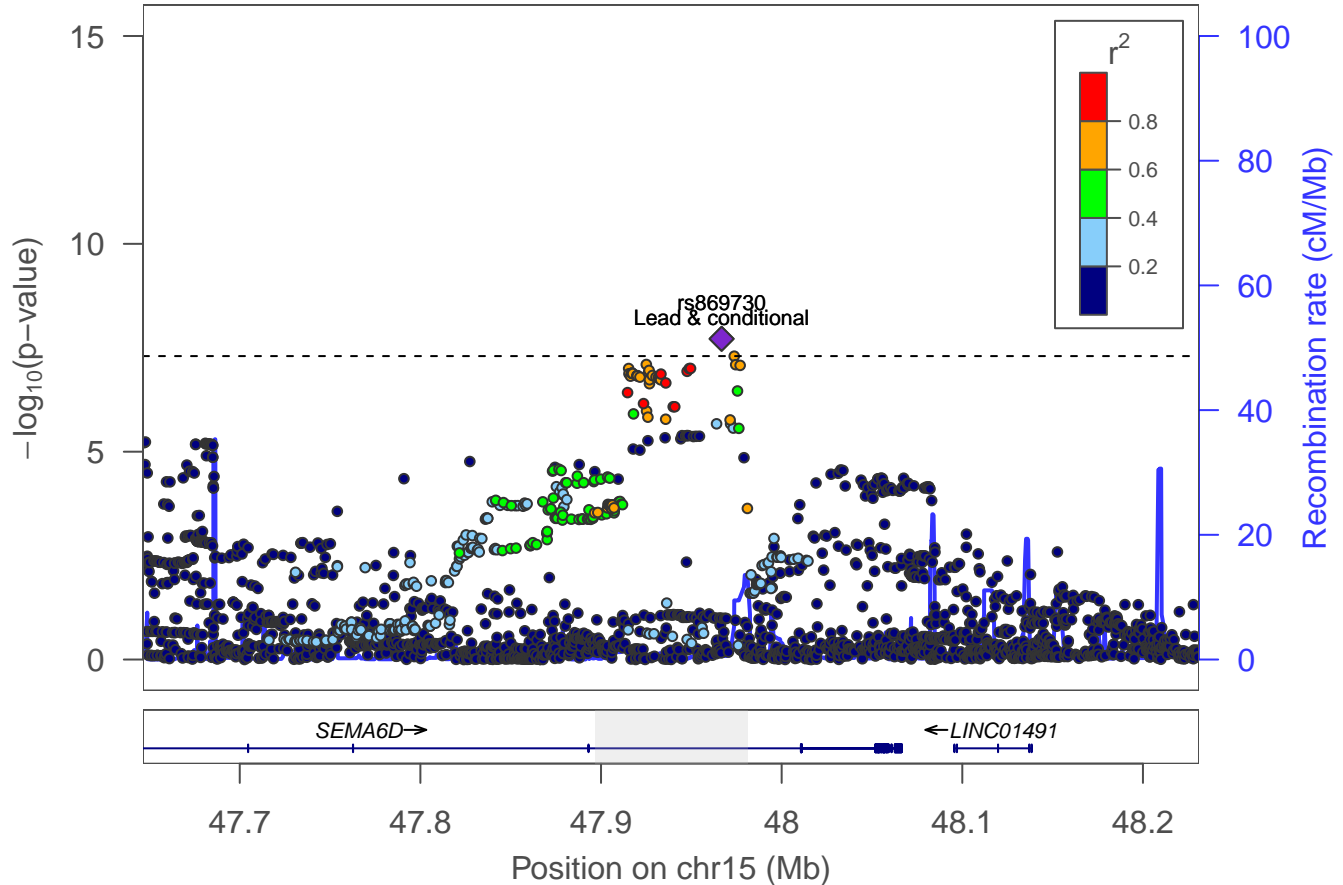

# Adventurousness: locus 112 [chr 15:73.330–73.627Mb]

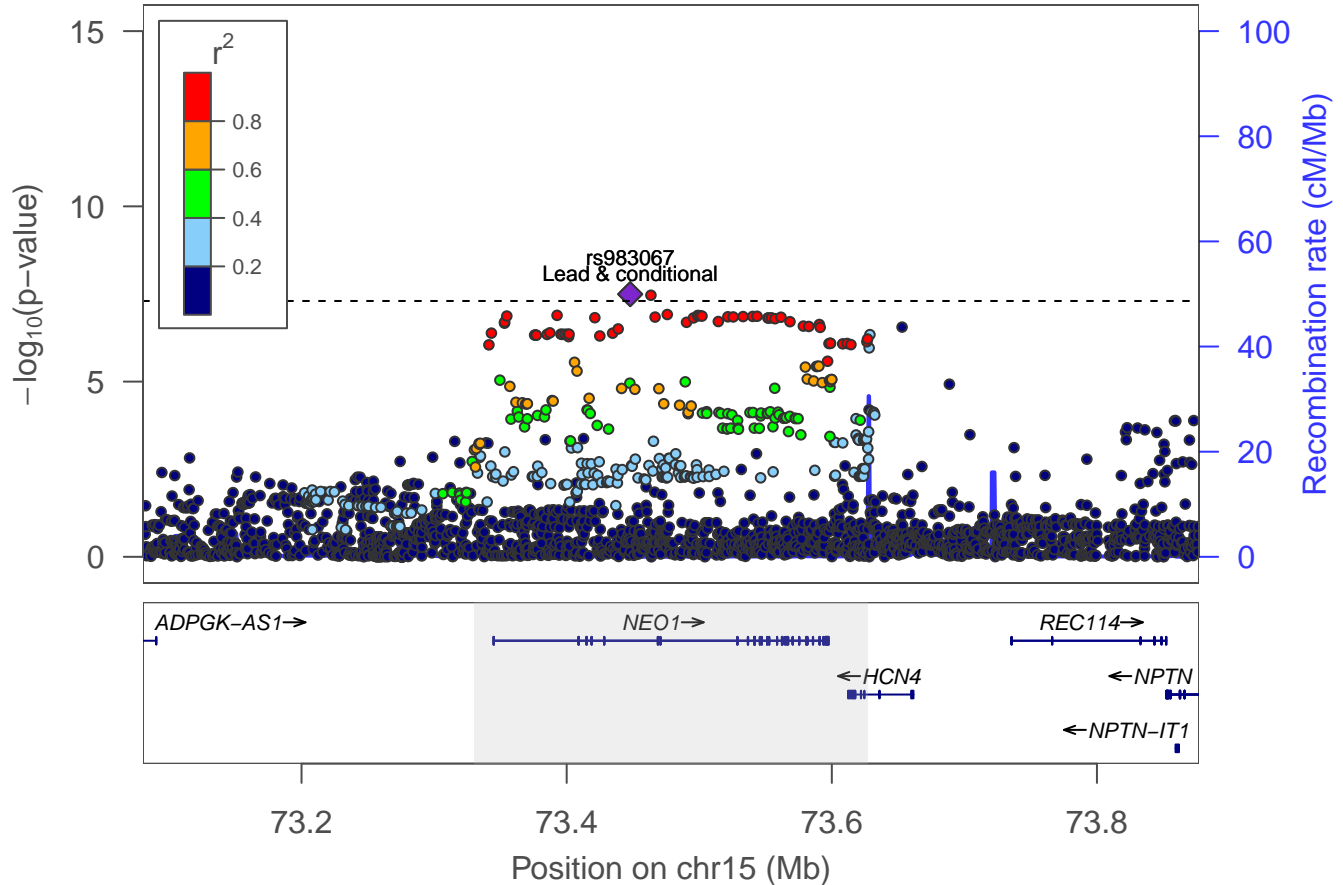

# Adventurousness: locus 113 [chr 15:96.003–96.043Mb]

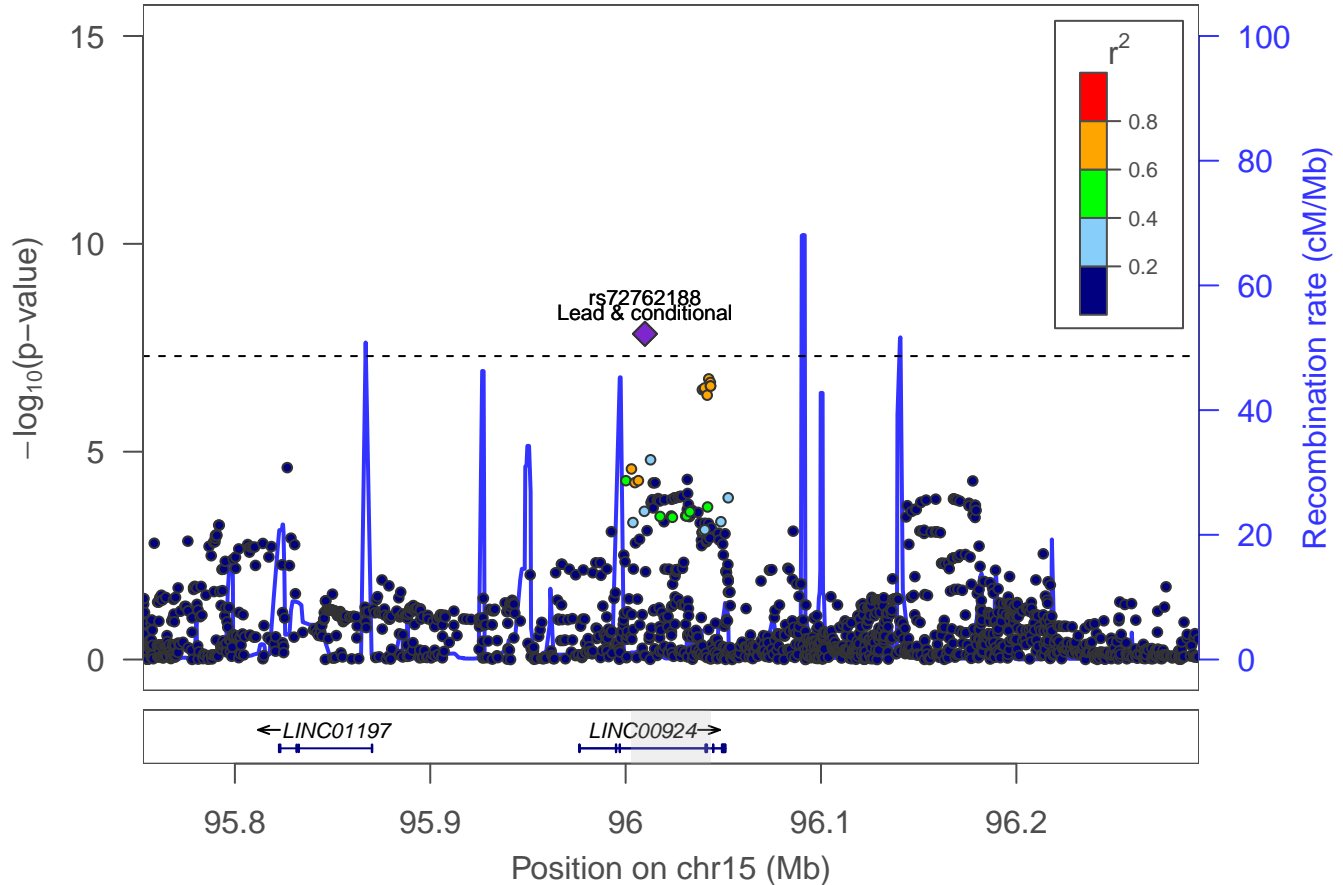



# Adventurousness: locus 114 [chr 16:7.325–7.417Mb]

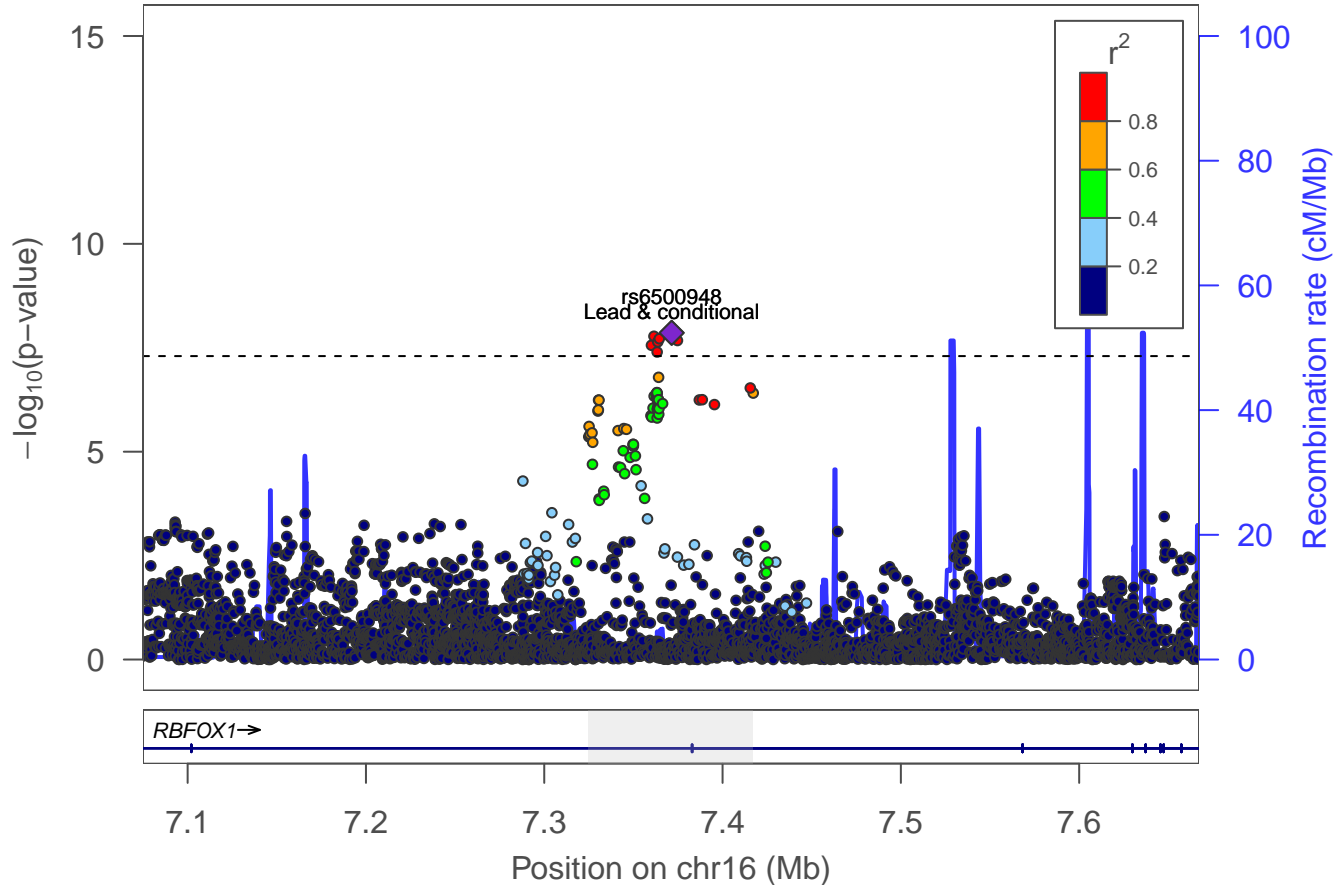

# Adventurousness: locus 115 [chr 16:28.826–29.008Mb]

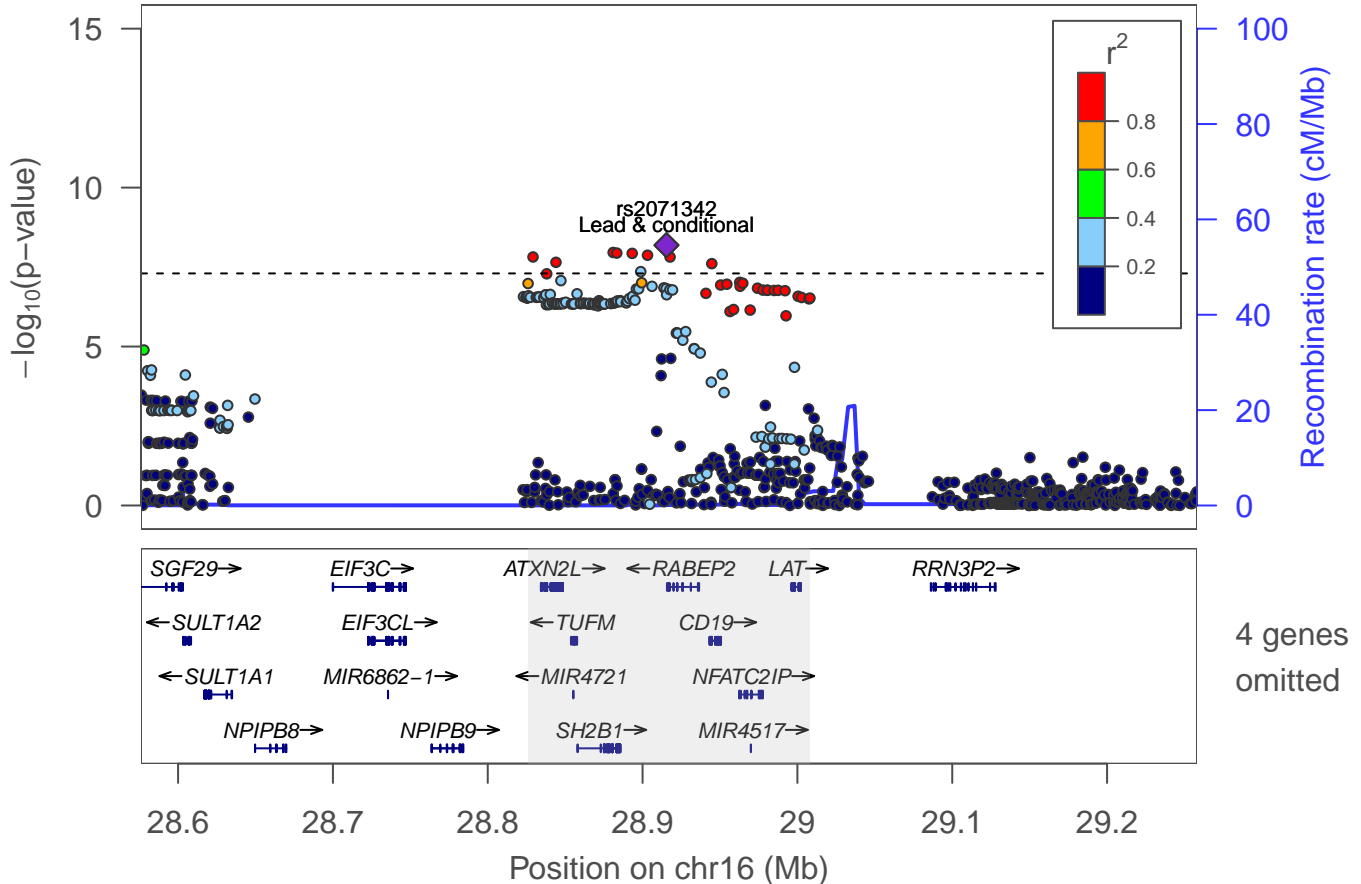

# Adventurousness: locus 116 [chr 16:29.979–30.081Mb]

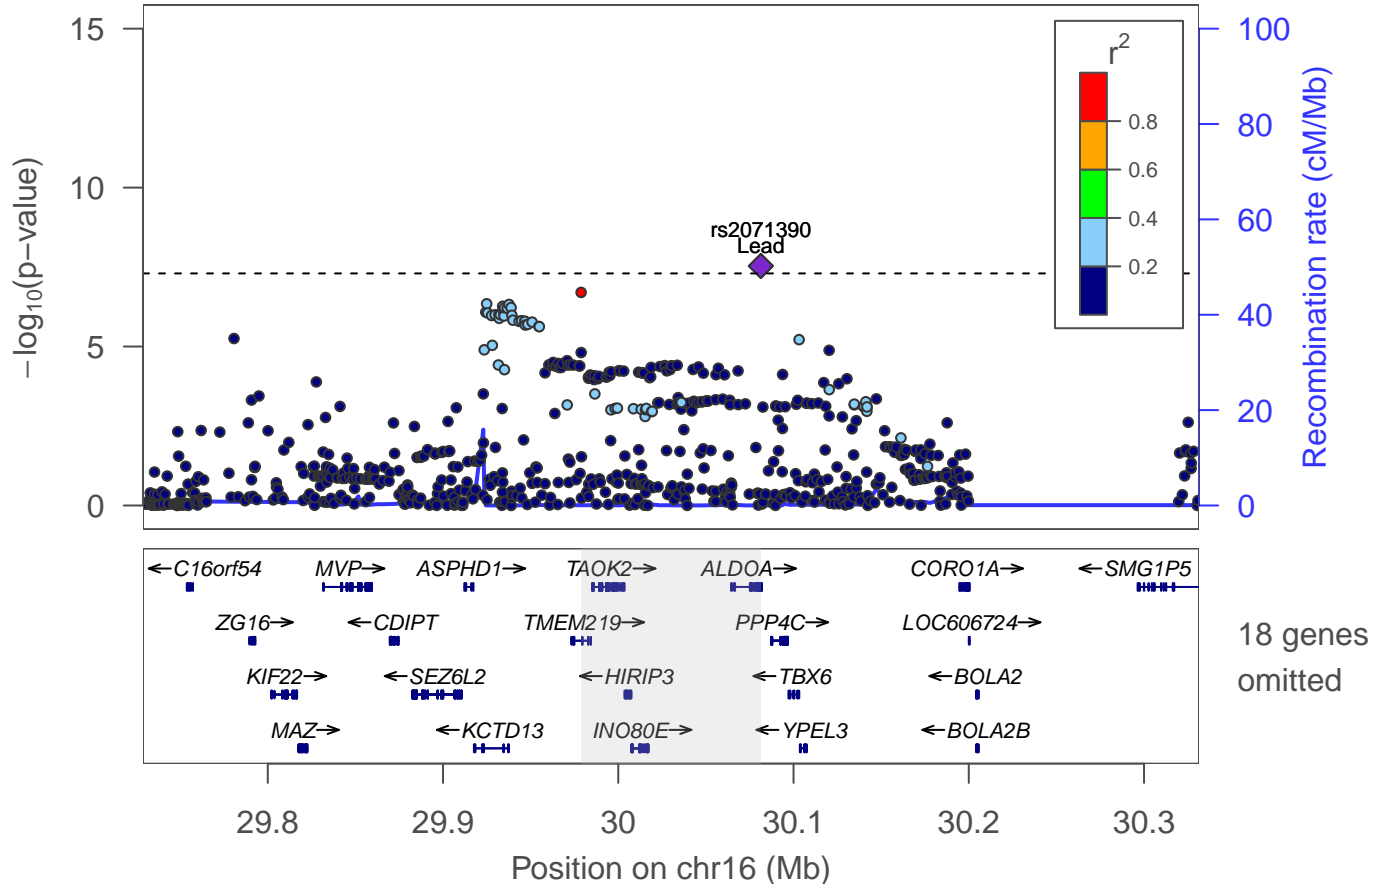

# Adventurousness: locus 117 [chr 16:50.913–50.988Mb]

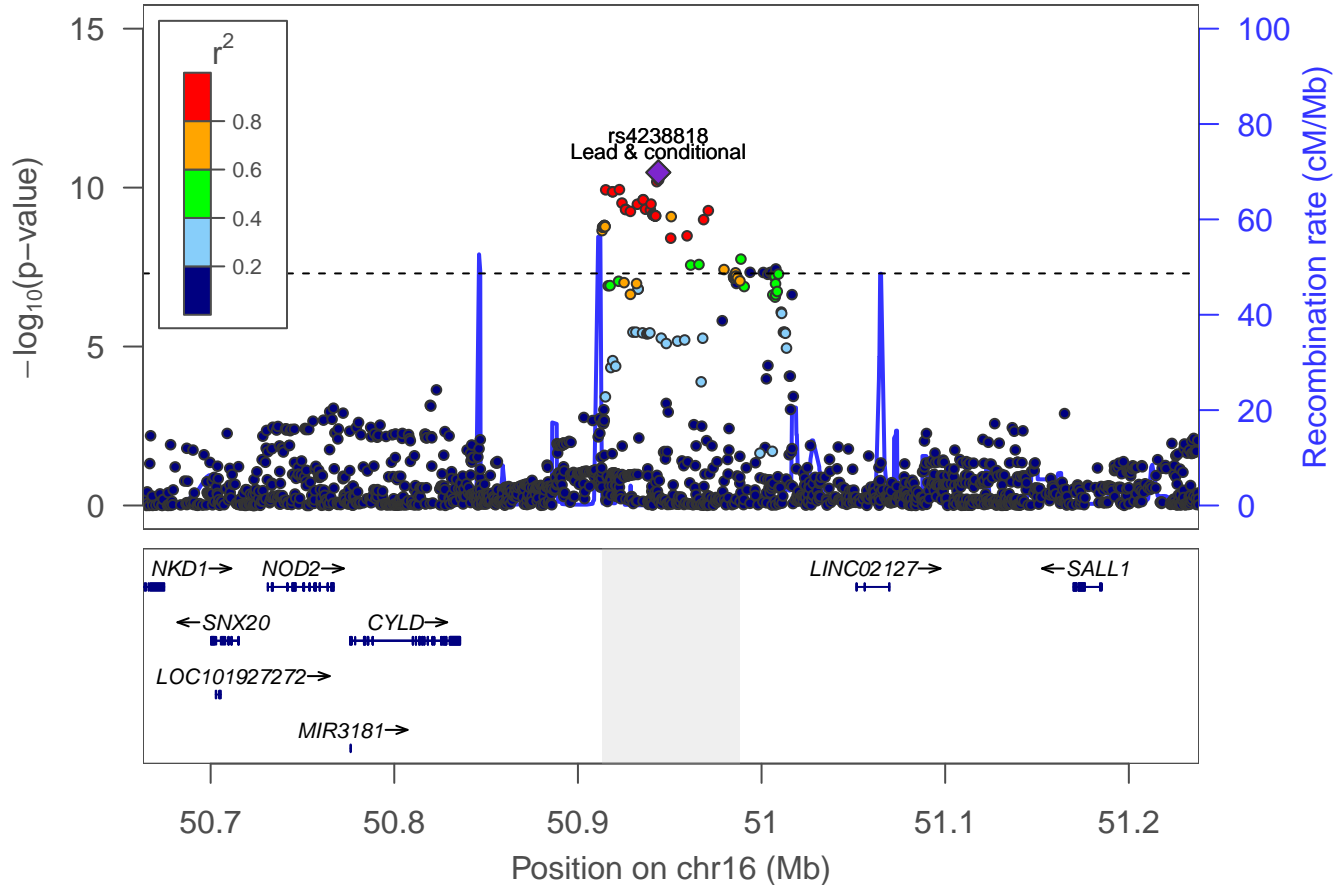

# Adventurousness: locus 118 [chr 16:51.443–51.456Mb]

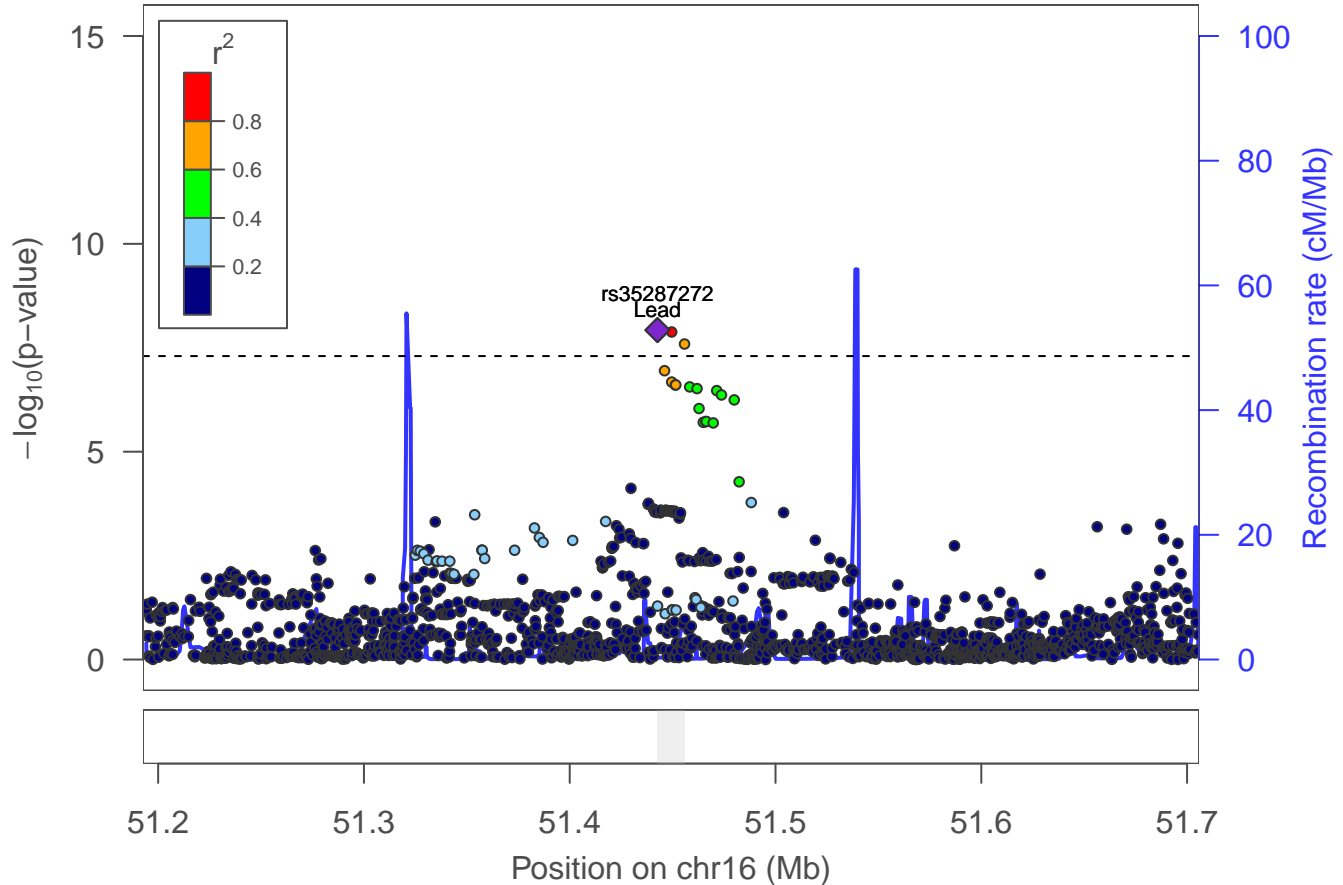

# Adventurousness: locus 119 [chr 16:52.093–52.166Mb]

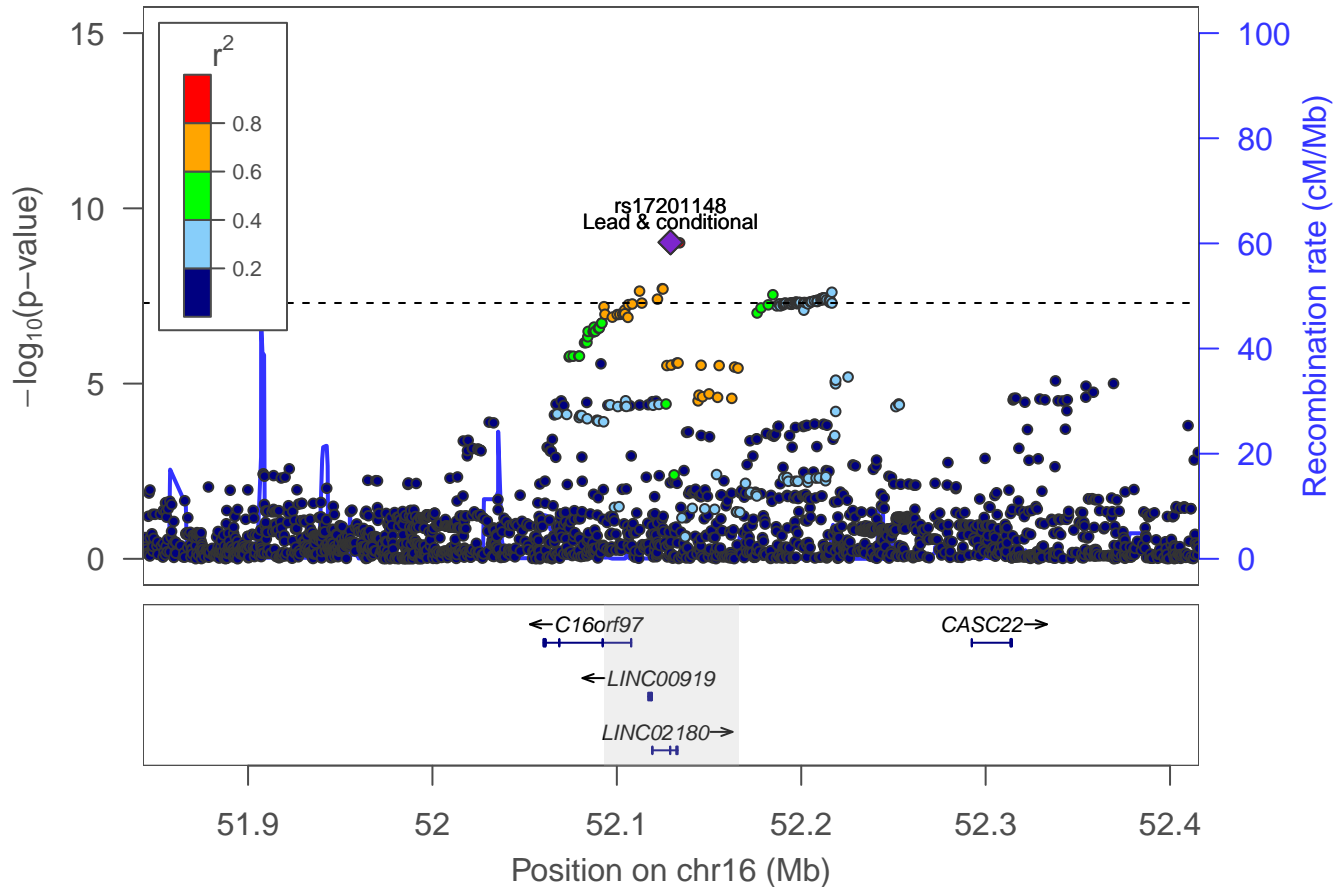

# Adventurousness: locus 120 [chr 16:54.547–54.547Mb]

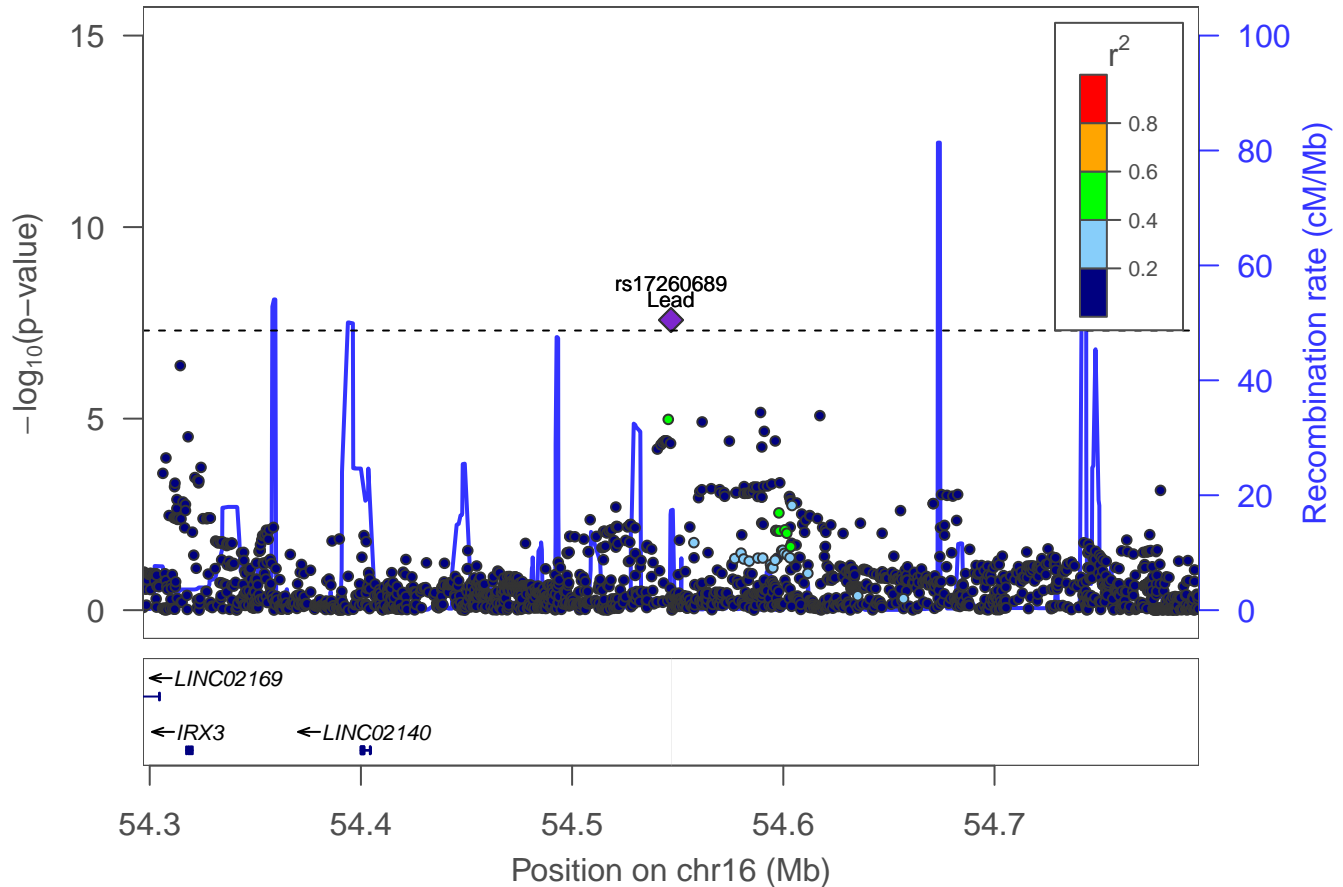

# Adventurousness: Locus 121 [chr 16: 61.647–61.835Mb]

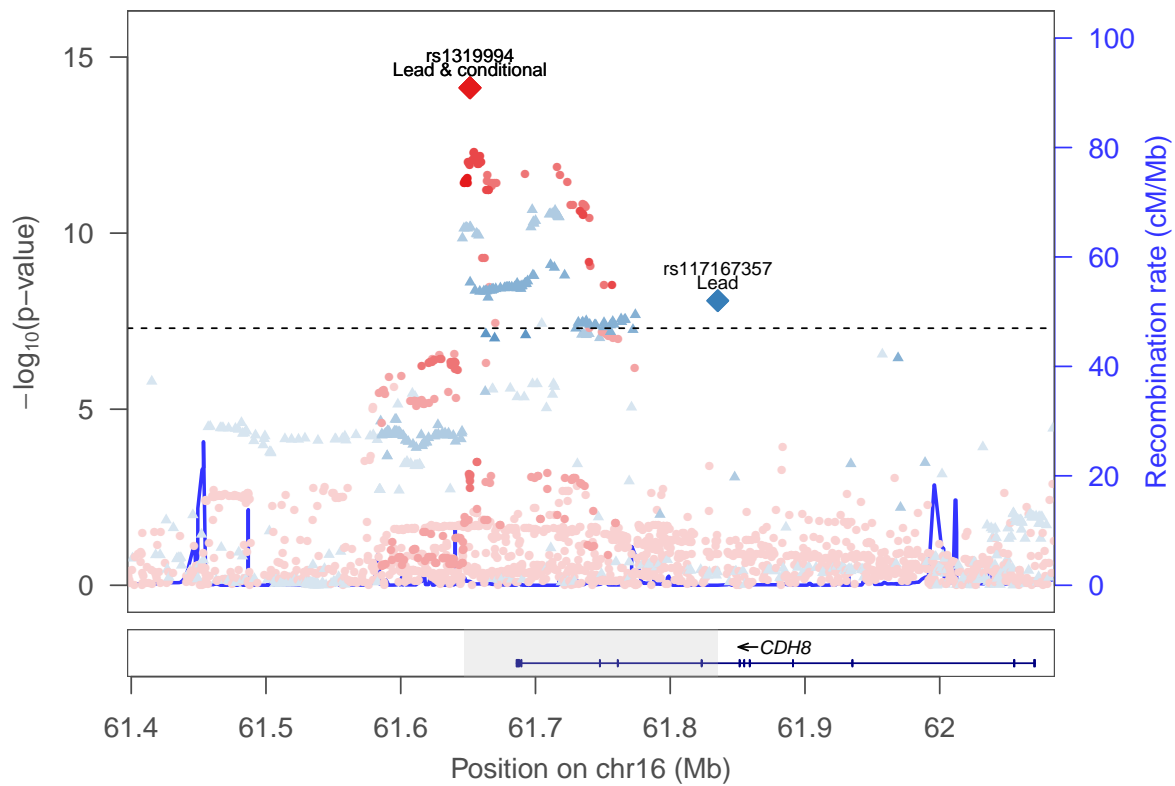

rs117167357 ▲  
rs1319994 ●

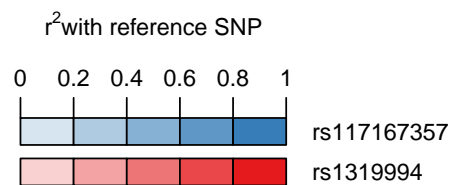



# Adventurousness: locus 122 [chr 17:11.197–11.211Mb]

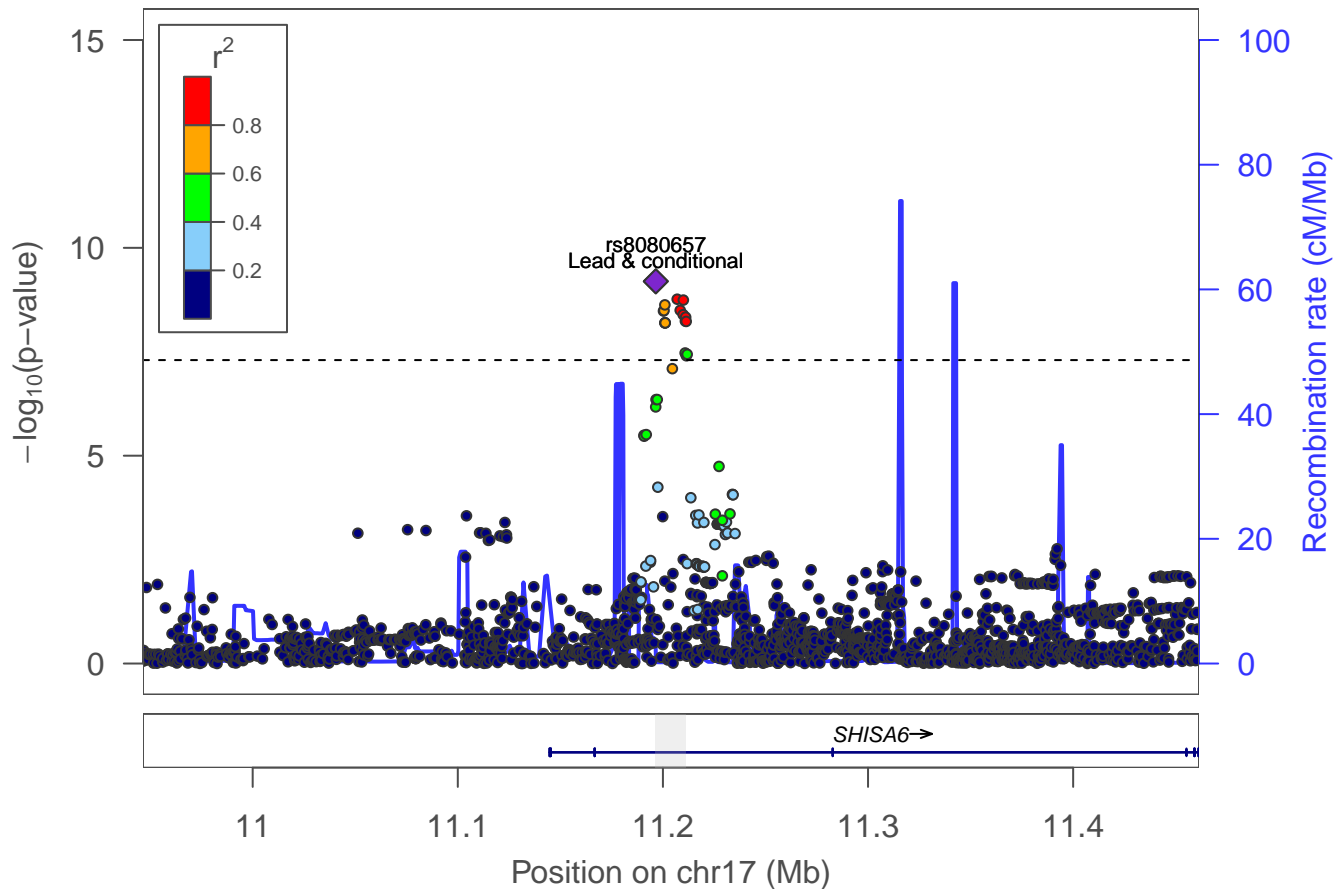

# Adventurousness: locus 123 [chr 17:16.132–16.264Mb]

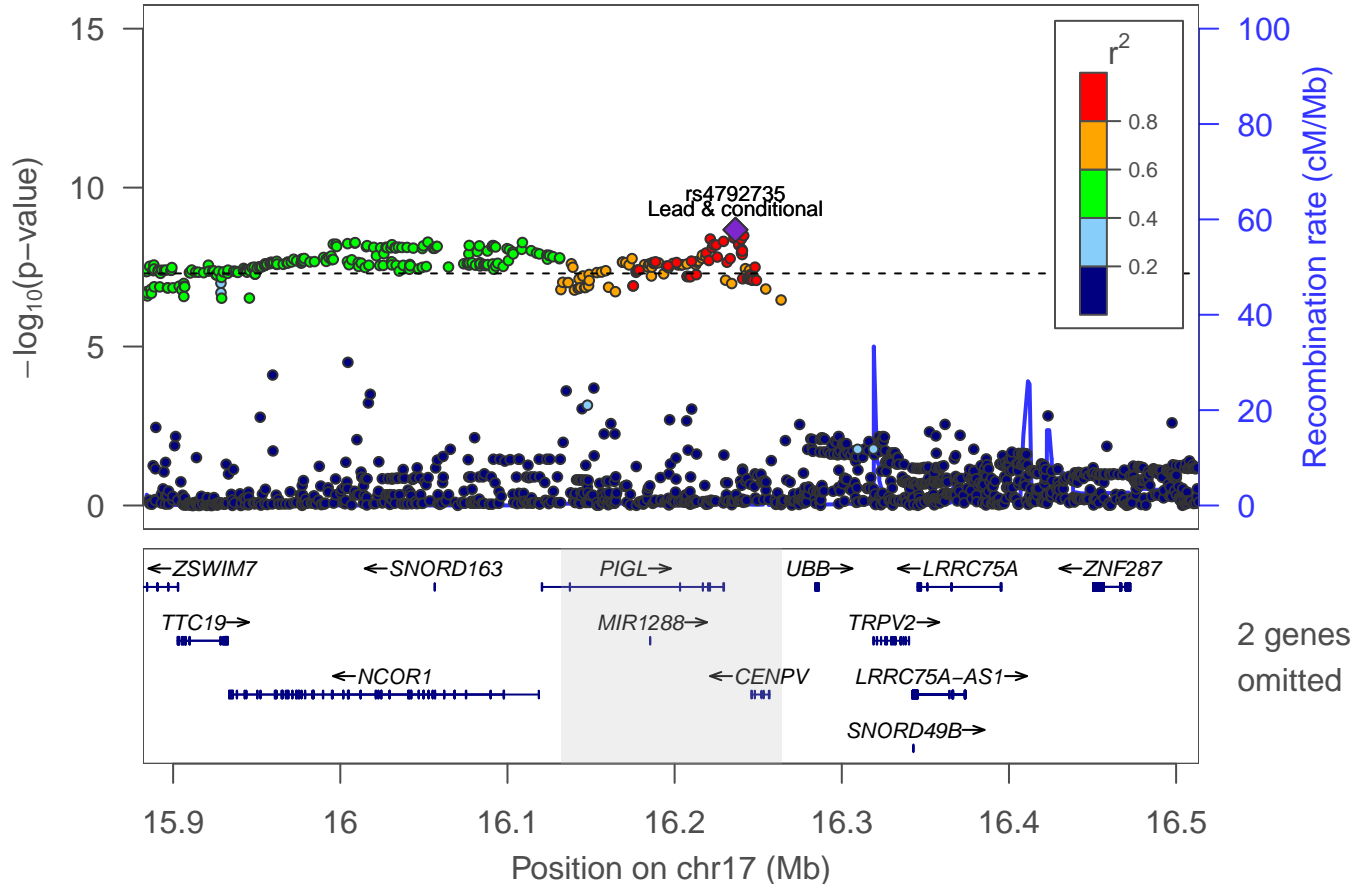

# Adventurousness: Locus 124 [chr 17: 29.398–29.754Mb]

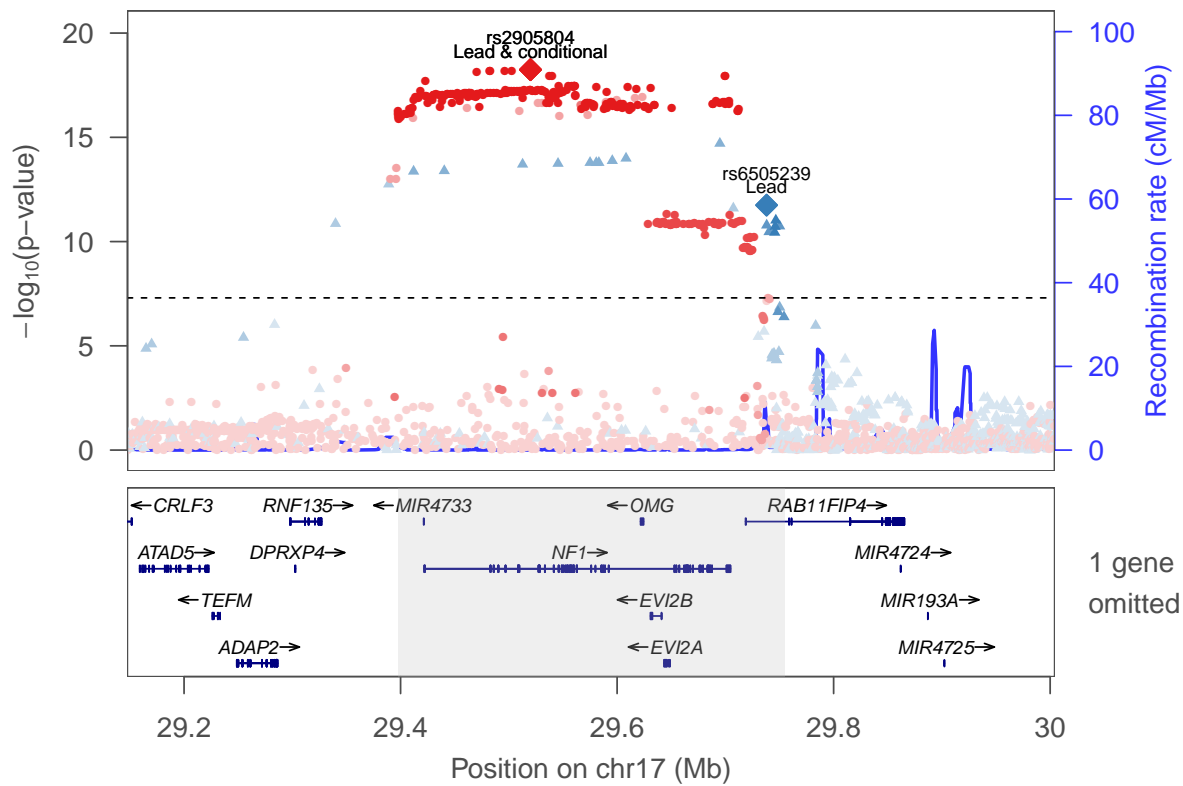

rs6505239 ▲  
rs2905804 ●

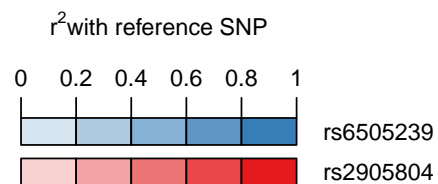

# Adventurousness: Locus 125 [chr 17: 48.625–48.653Mb]

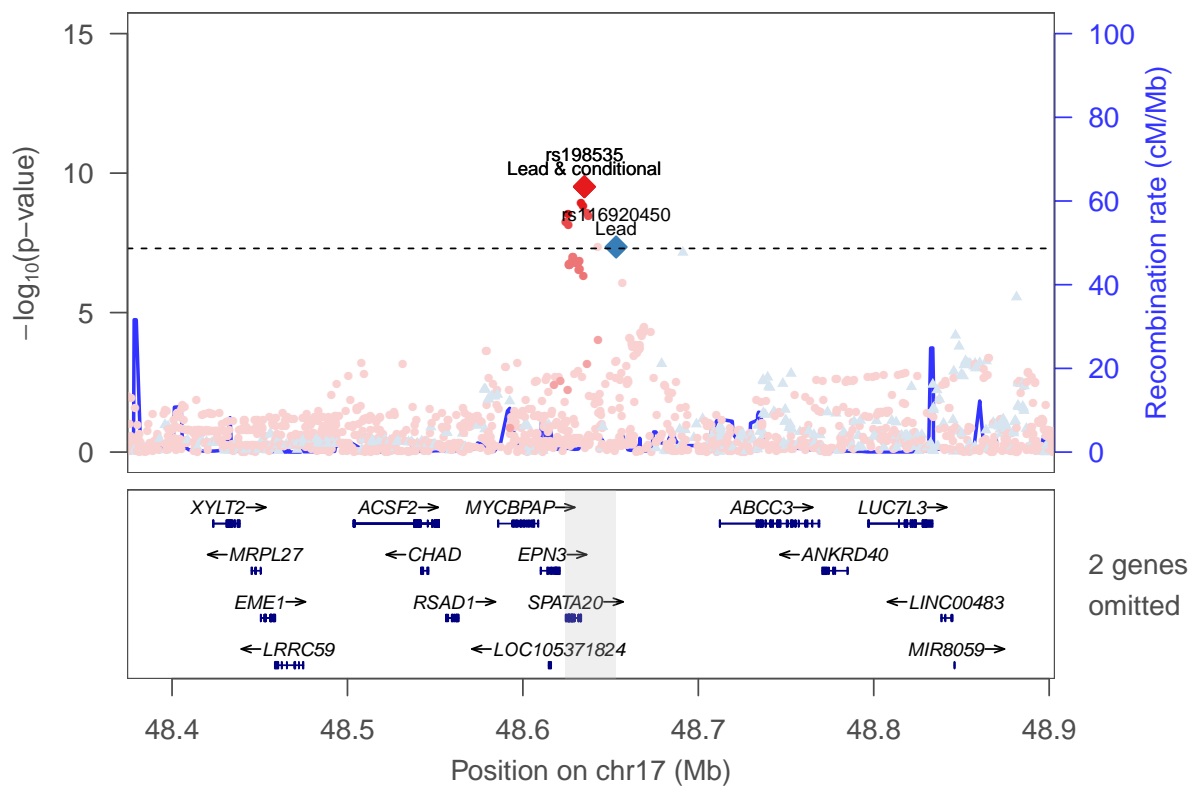

rs116920450 ▲  
 rs198535 ●

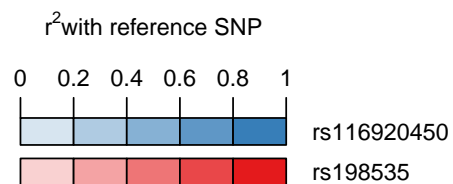

# Adventurousness: locus 126 [chr 17:61.205–61.543Mb]

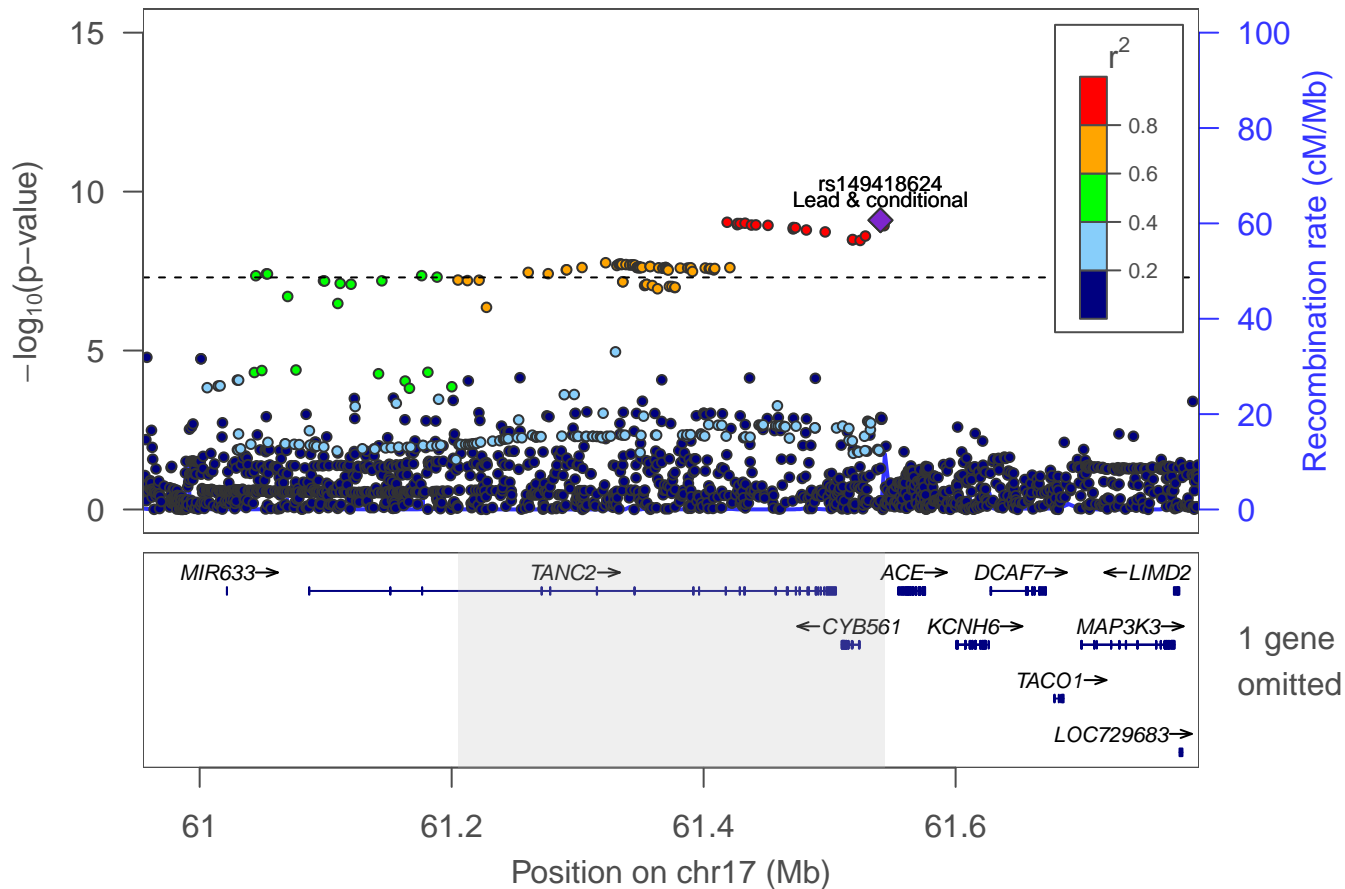

# Adventurousness: locus 127 [chr 17:71.875–71.902Mb]

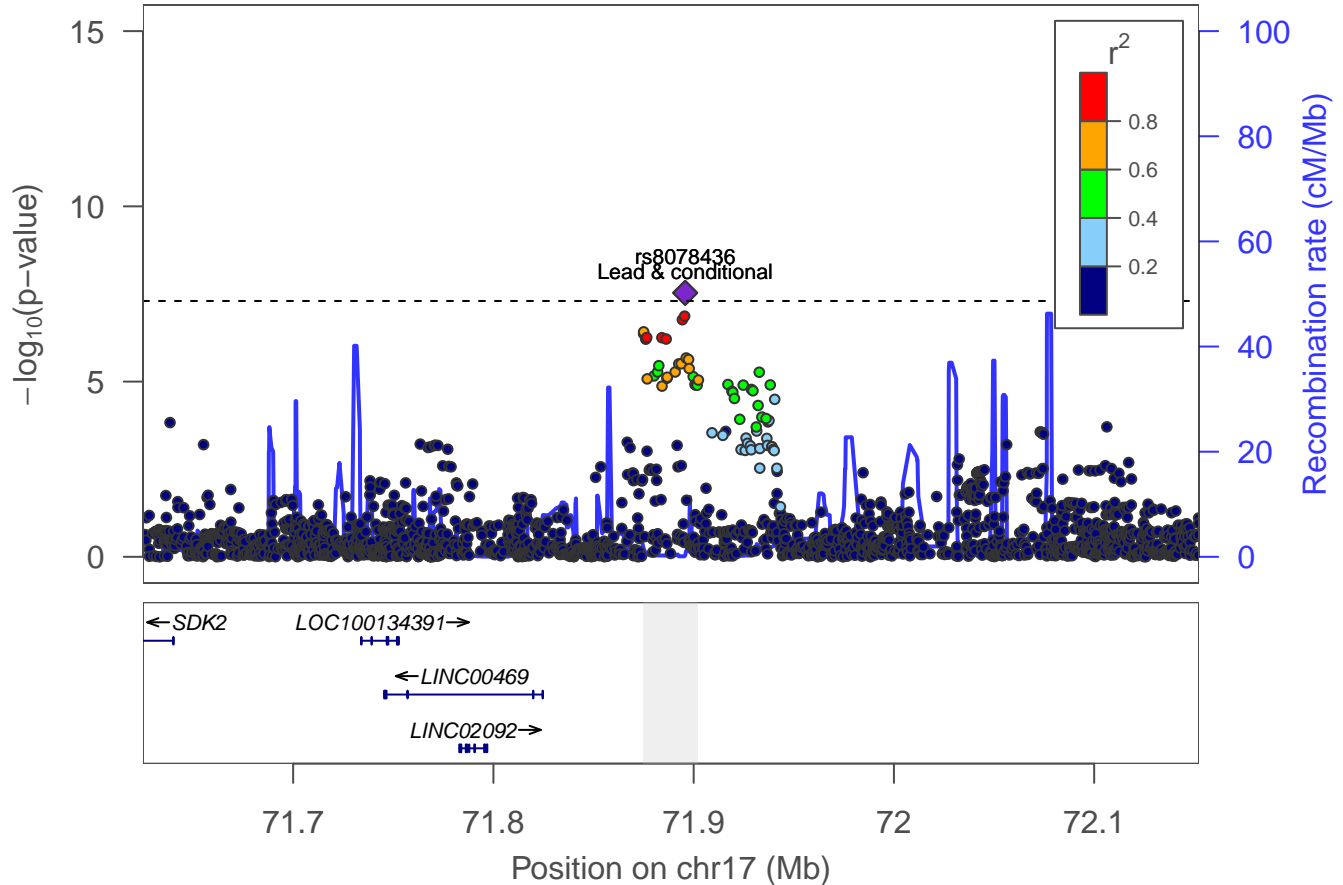

# Adventurousness: locus 128 [chr 18:52.972–53.116Mb]

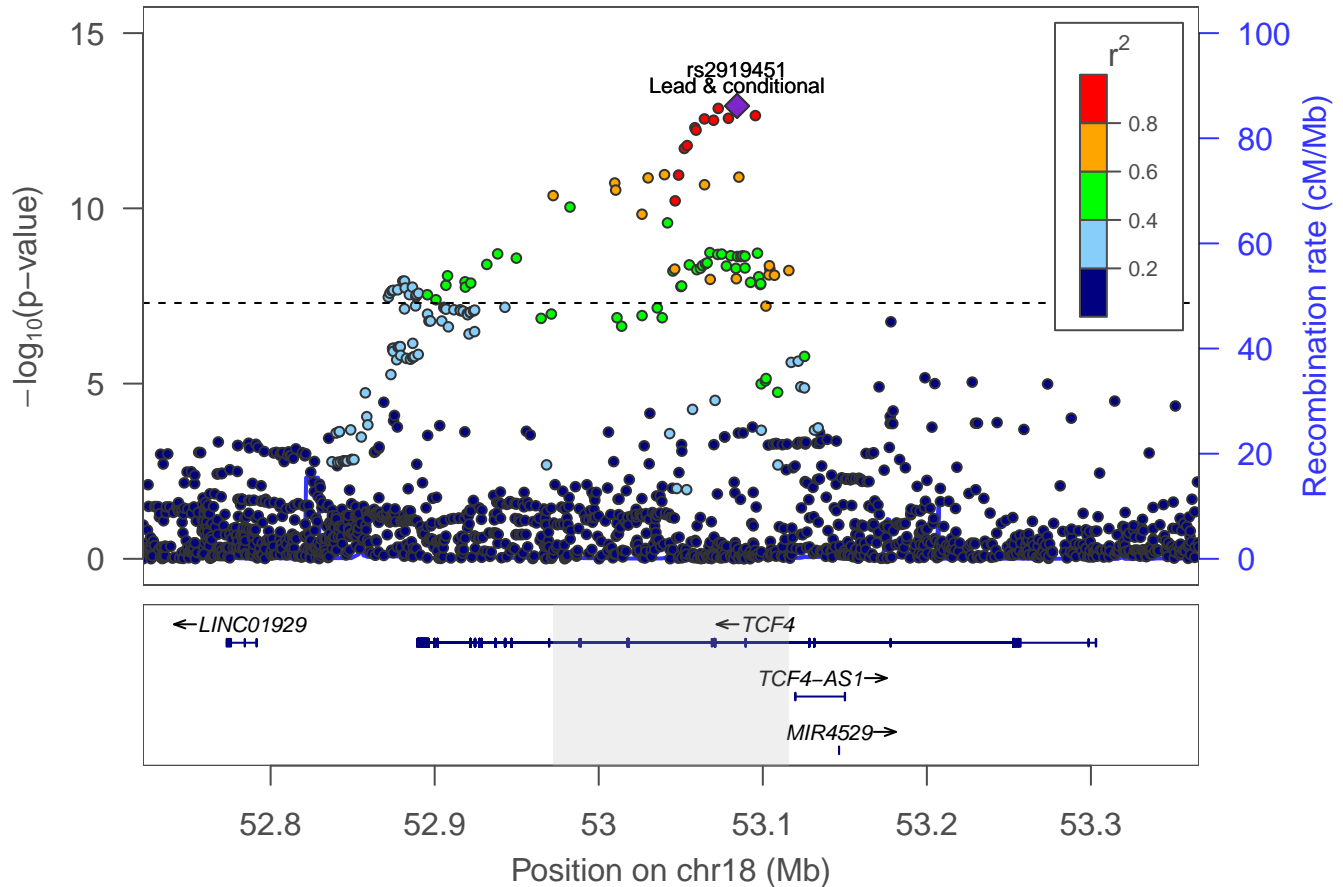

# Adventurousness: locus 129 [chr 18:53.480–53.510Mb]

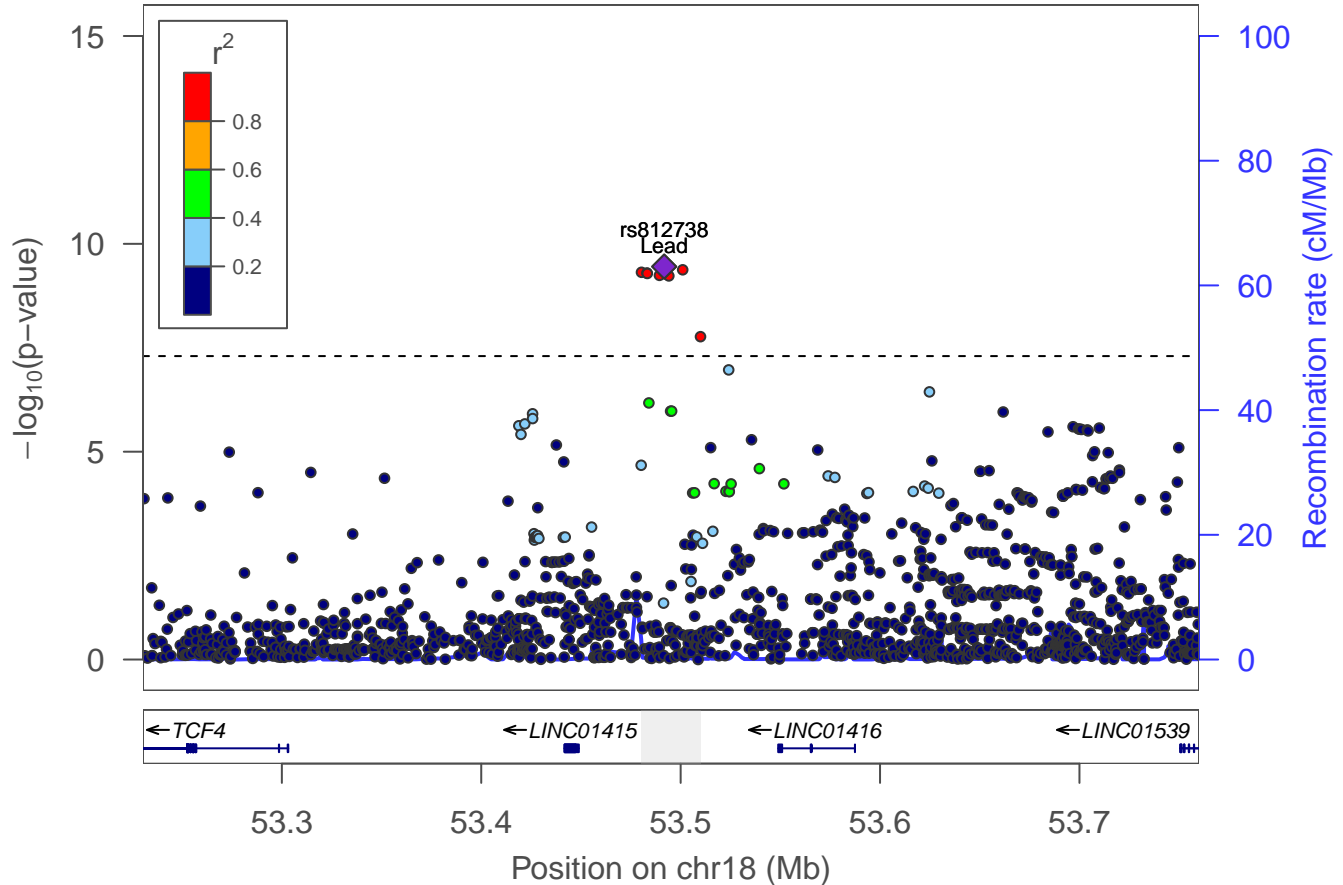



# Adventurousness: locus 130 [chr 19:14.607–14.657Mb]

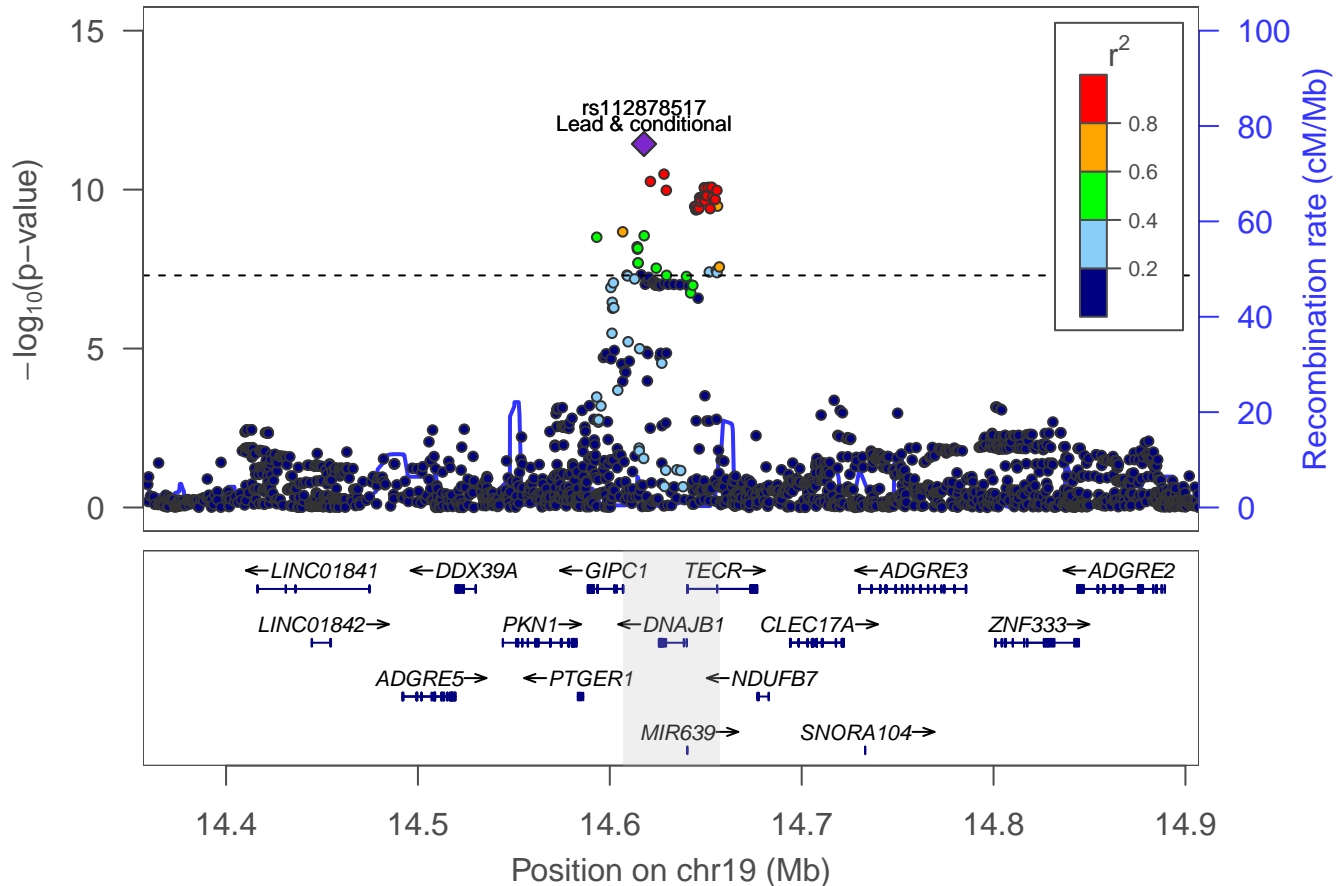

# Adventurousness: locus 131 [chr 19:31.830–31.940Mb]

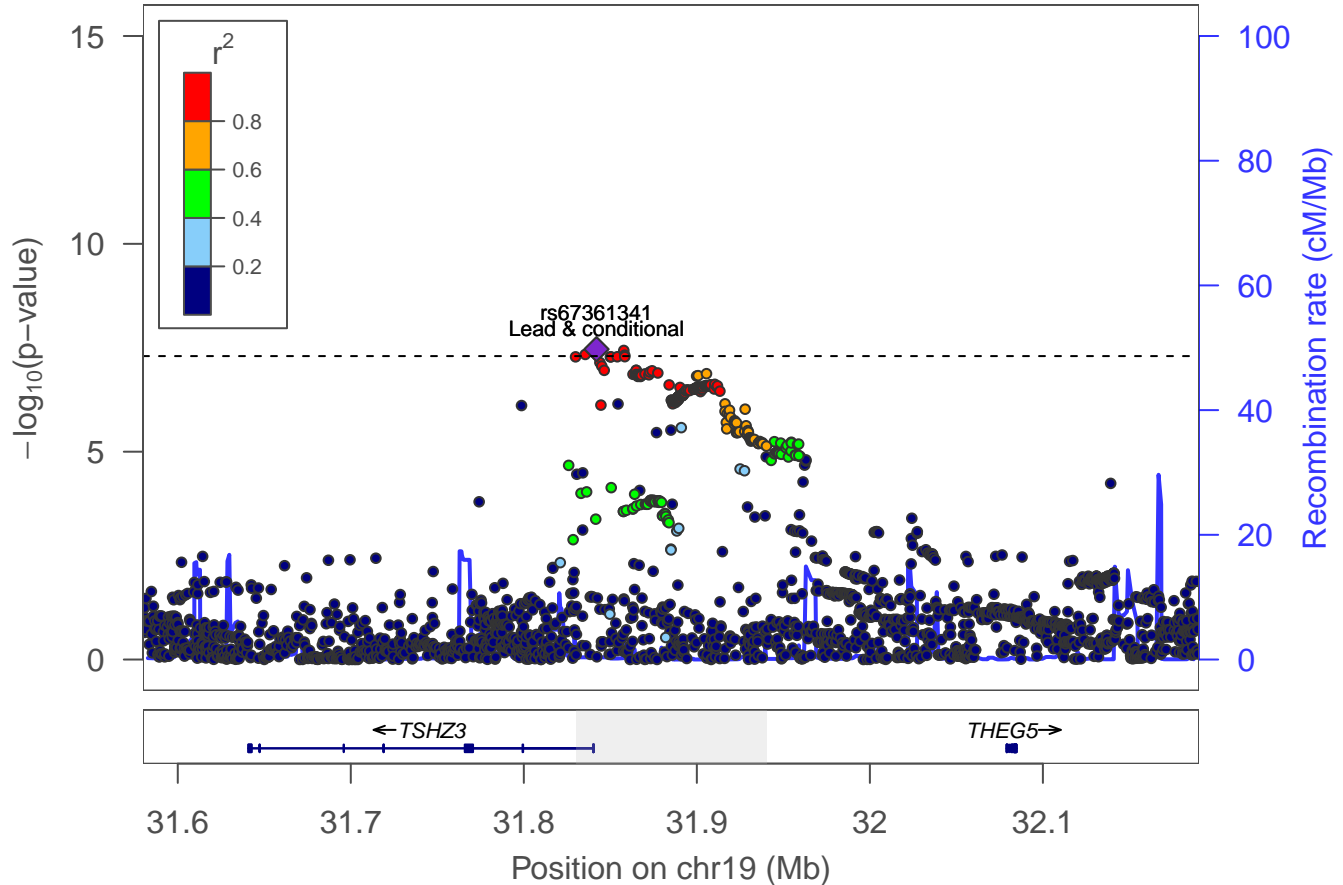

# Adventurousness: locus 132 [chr 20:15.740–15.802Mb]

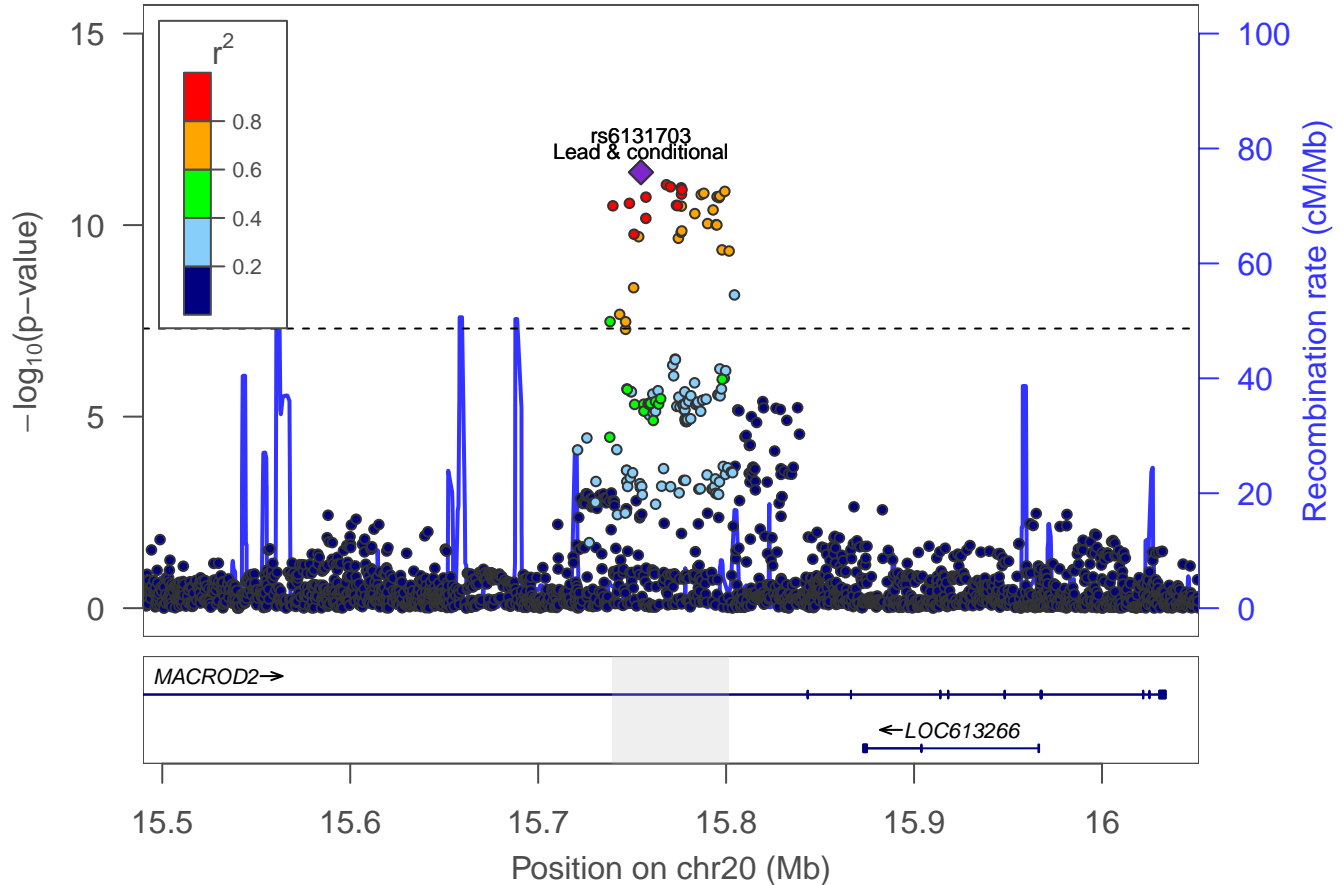

# Adventurousness: locus 133 [chr 20:51.601–51.631Mb]

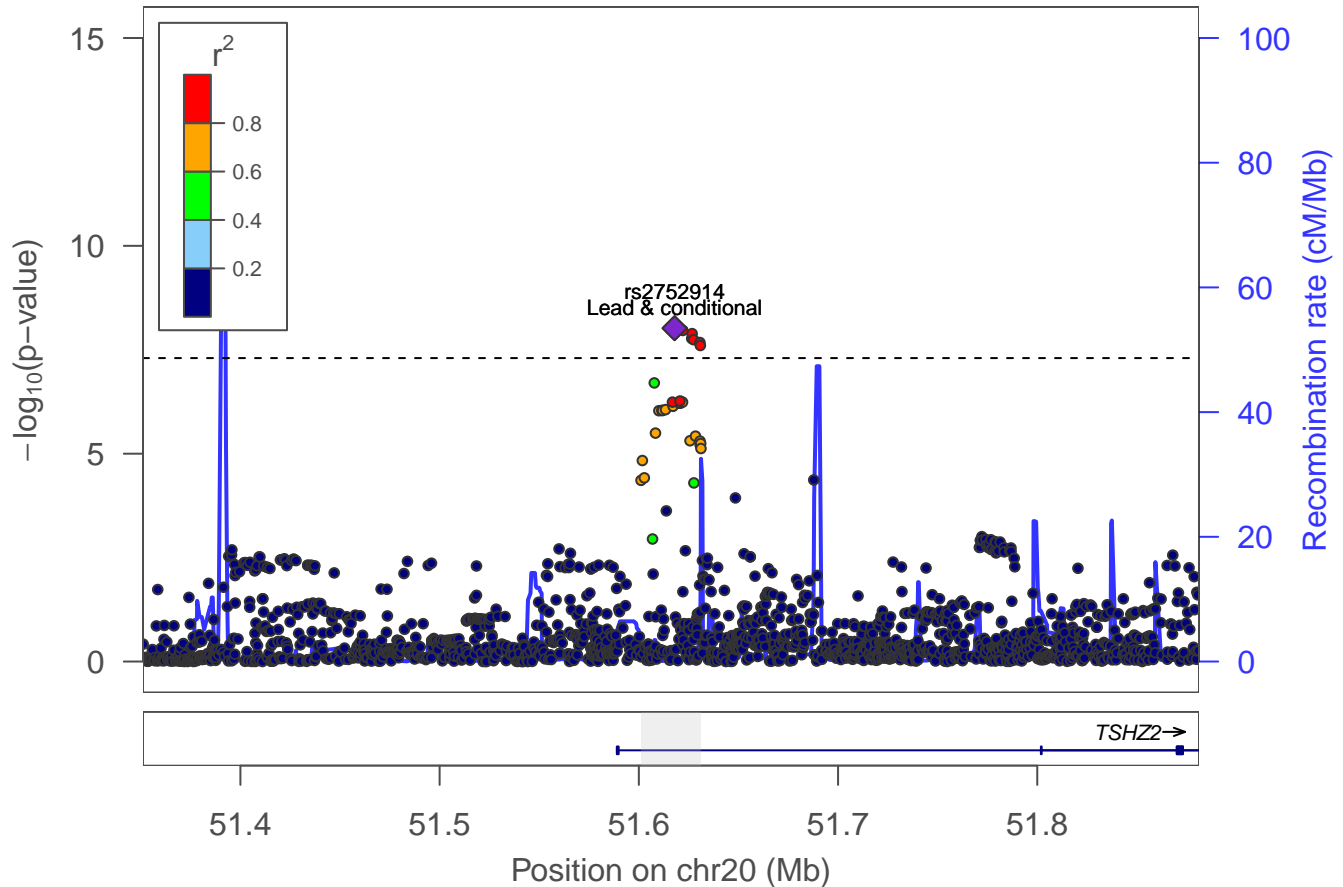

# Adventurousness: locus 134 [chr 20:52.547–52.558Mb]

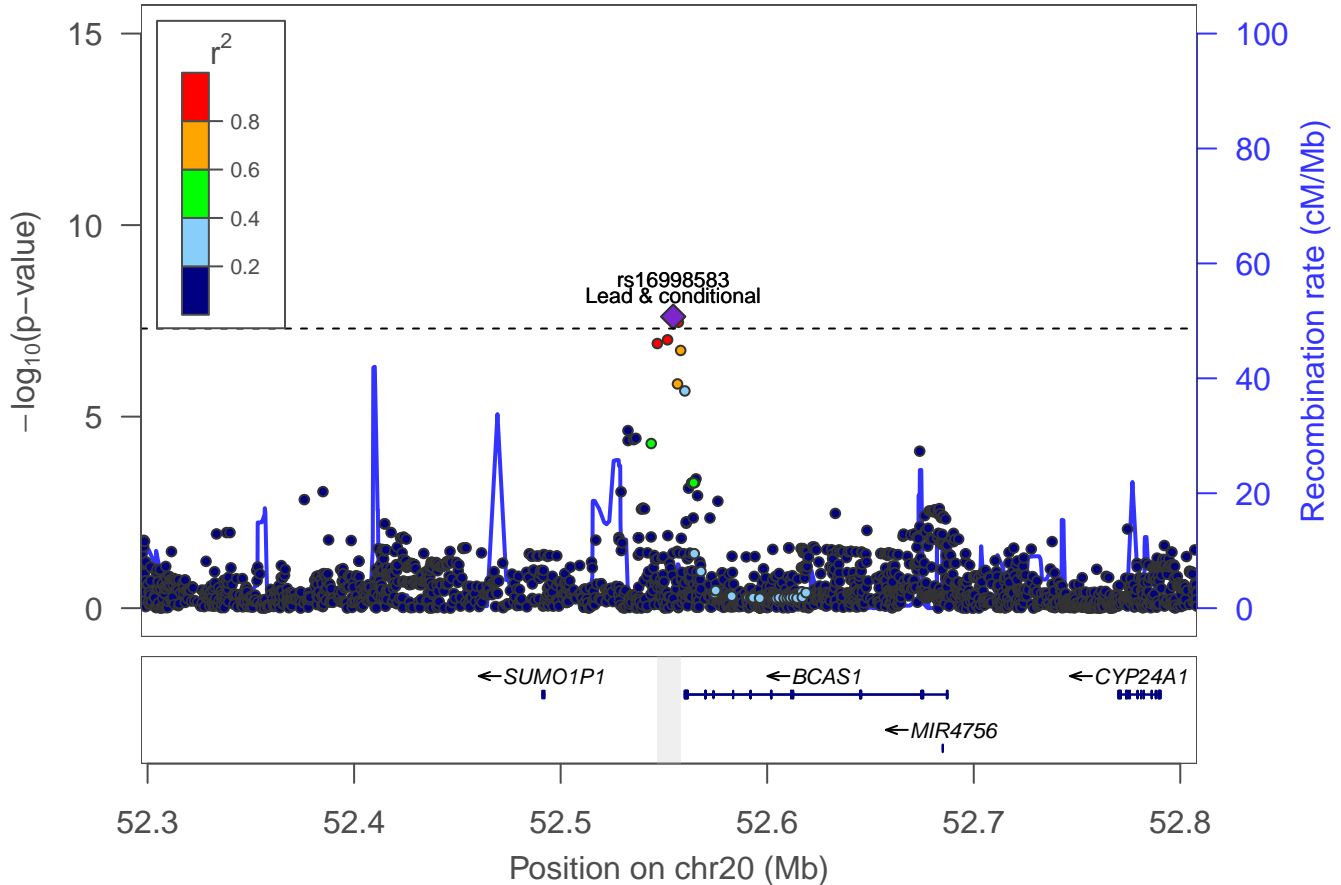

# Adventurousness: locus 135 [chr 20:62.692–62.713Mb]

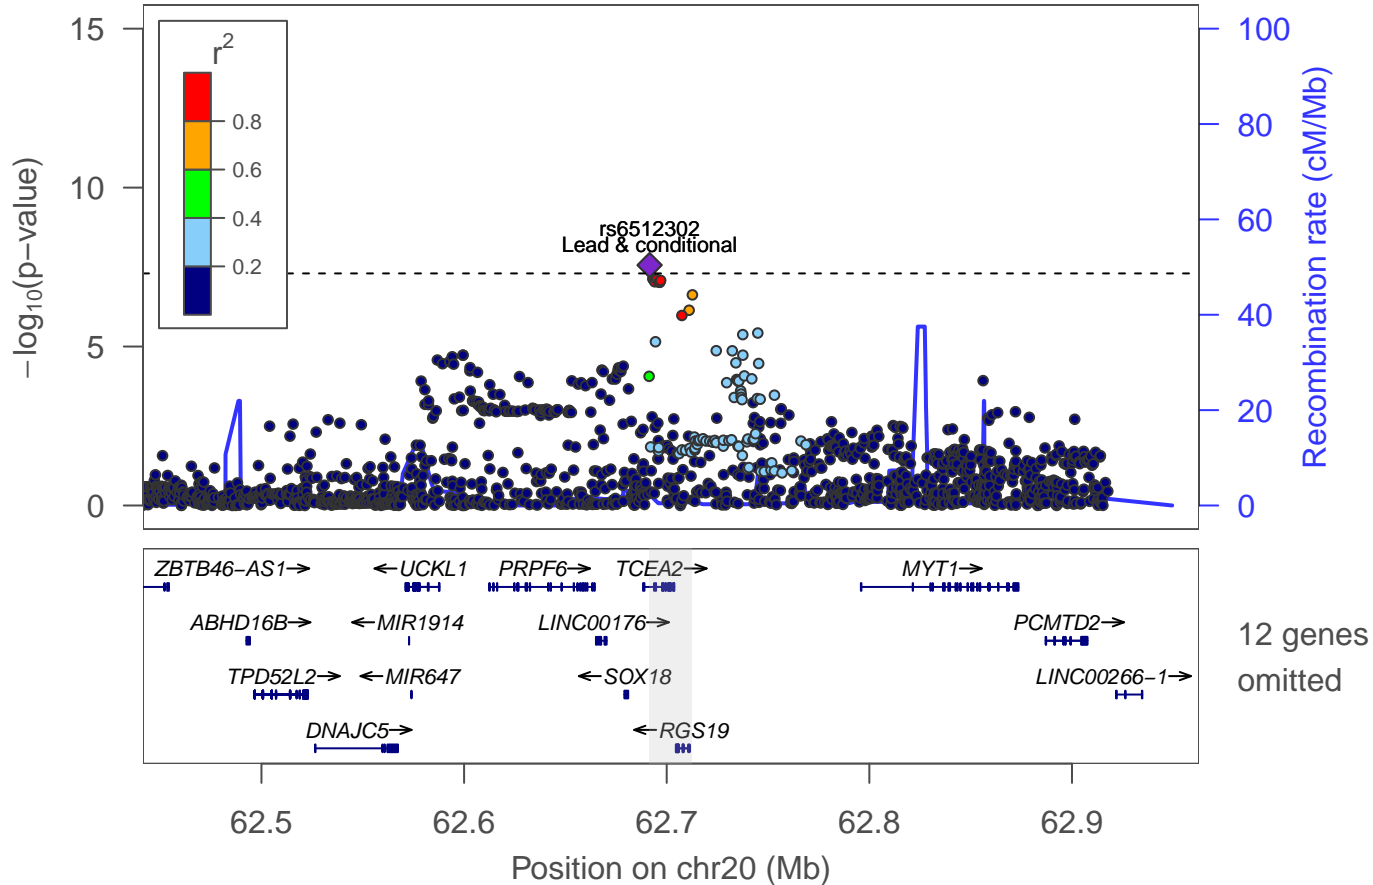

# Adventurousness: locus 136 [chr 22:22.105–22.333Mb]

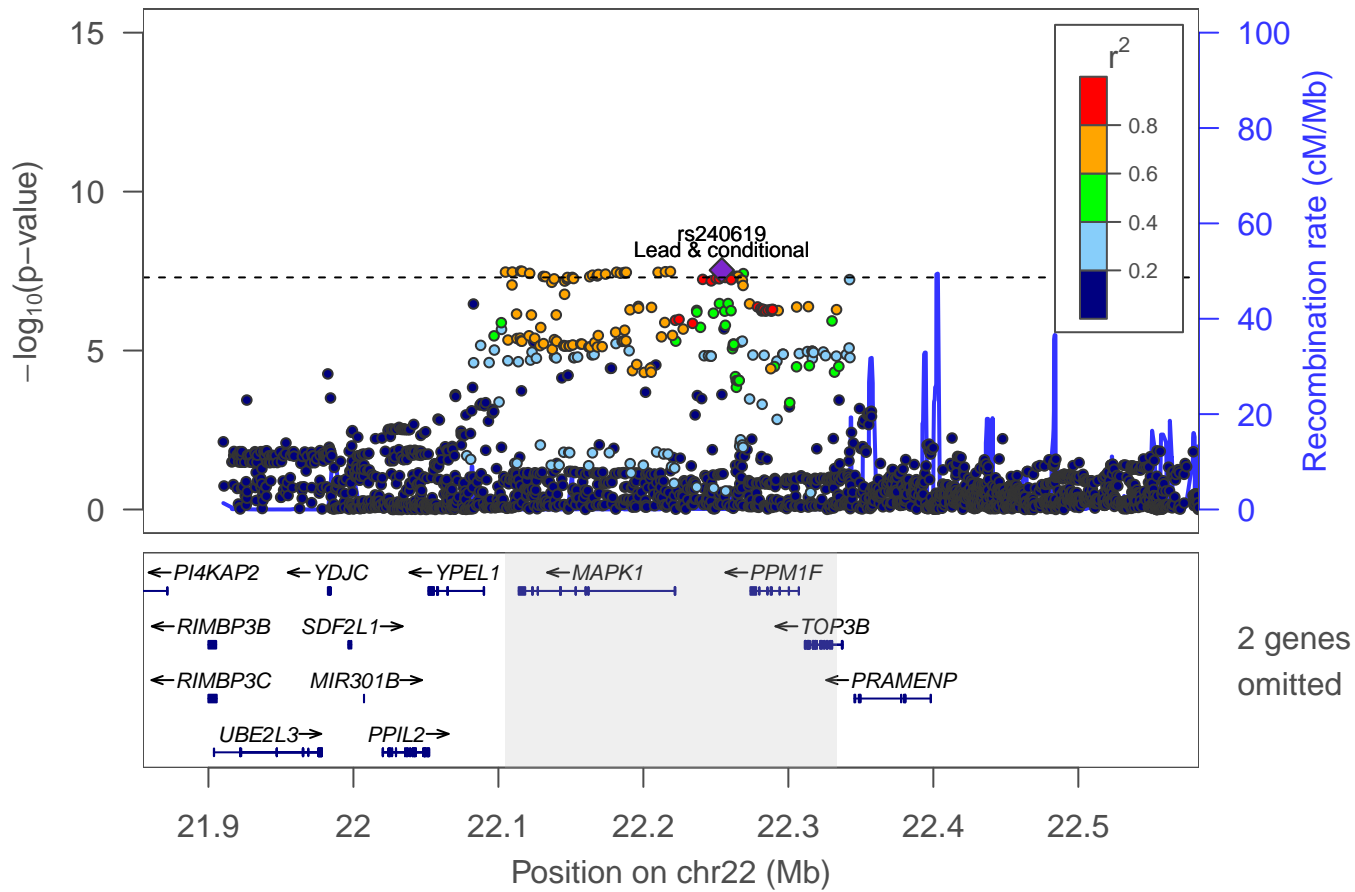

# Adventurousness: Locus 137 [chr 22: 41.547–41.715Mb]

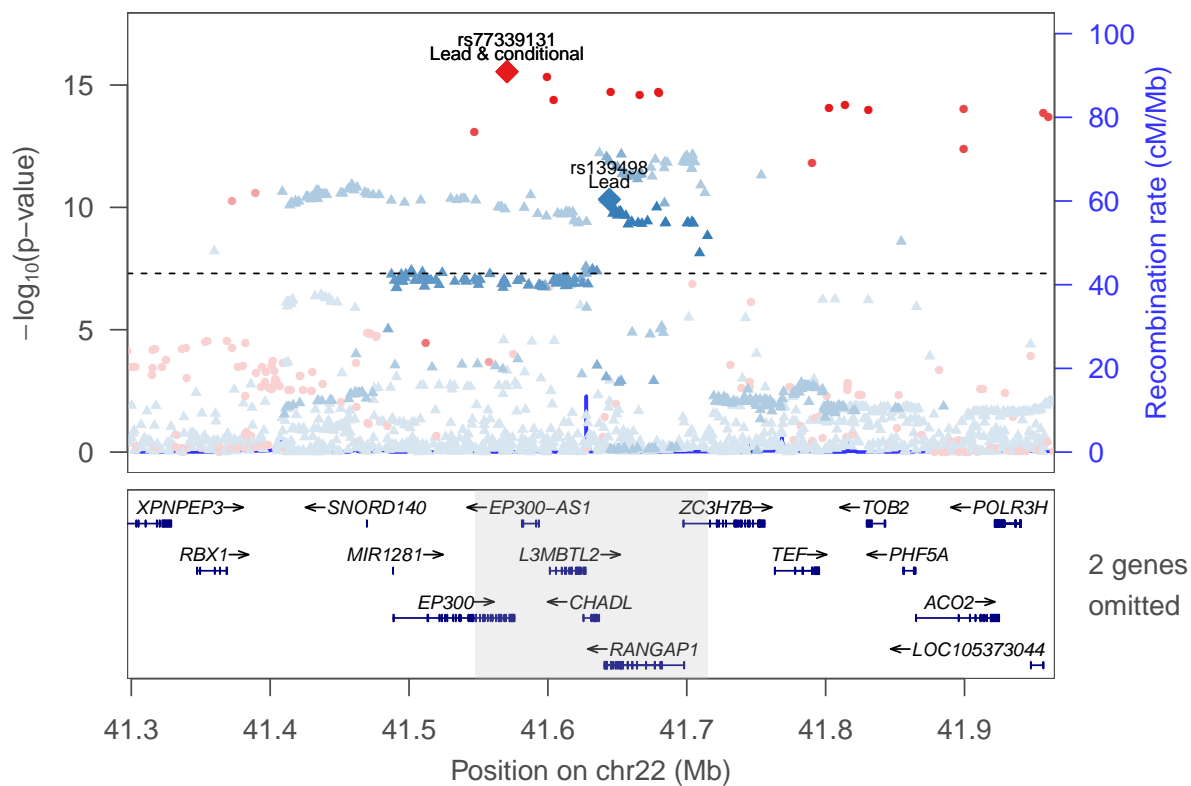

rs139498 ▲  
 rs77339131 ●

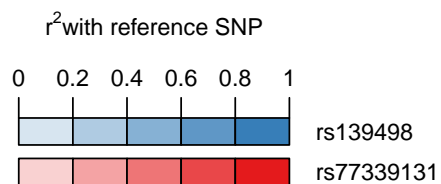



LocusZoom plots for the 36 loci identified  
in the GWAS of automobile speeding  
propensity

---

# Auto. speeding propensity: locus 1 [chr 1:67.008–67.130Mb]

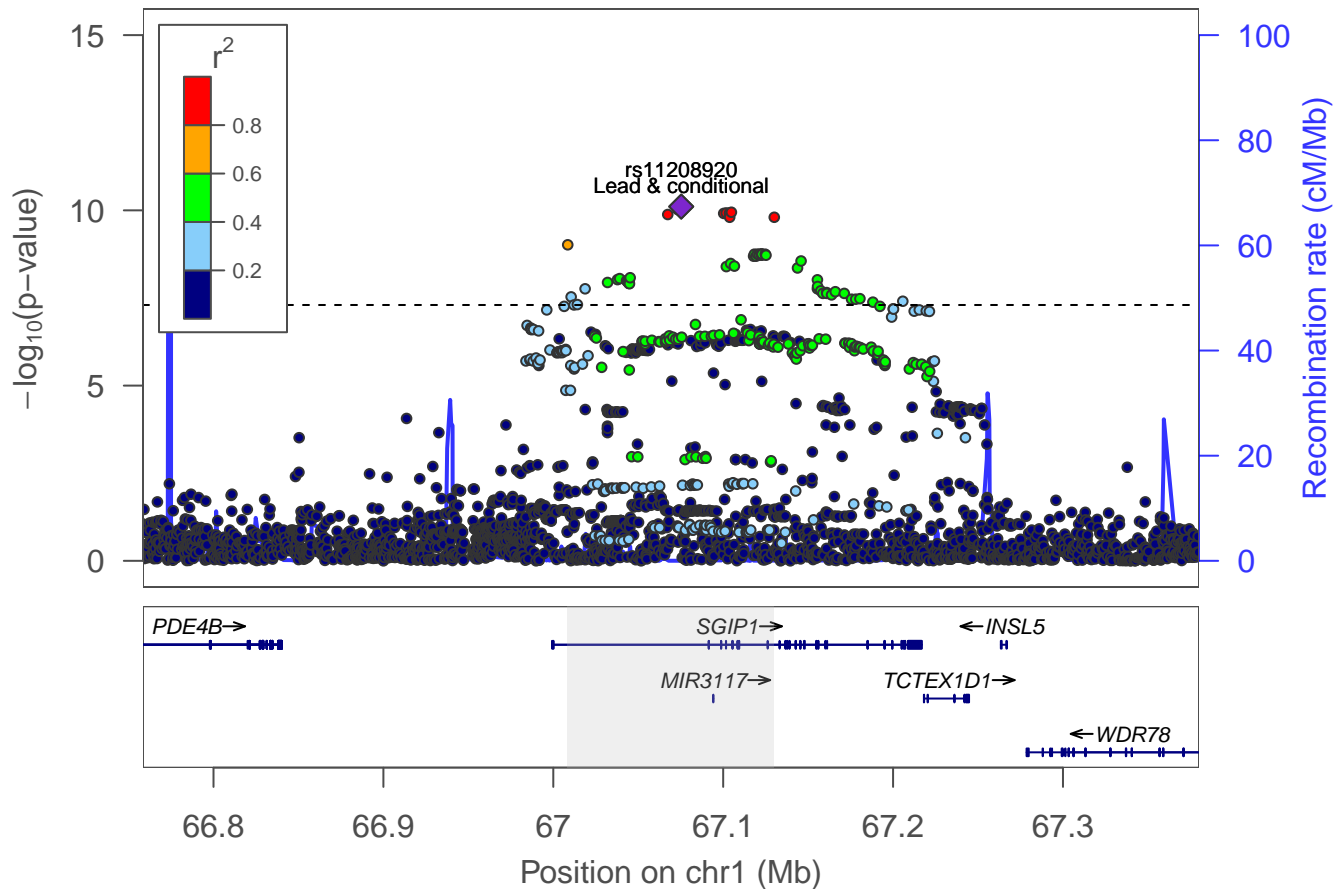

# Auto. speeding propensity: locus 2 [chr 1:176.522–176.675Mb]

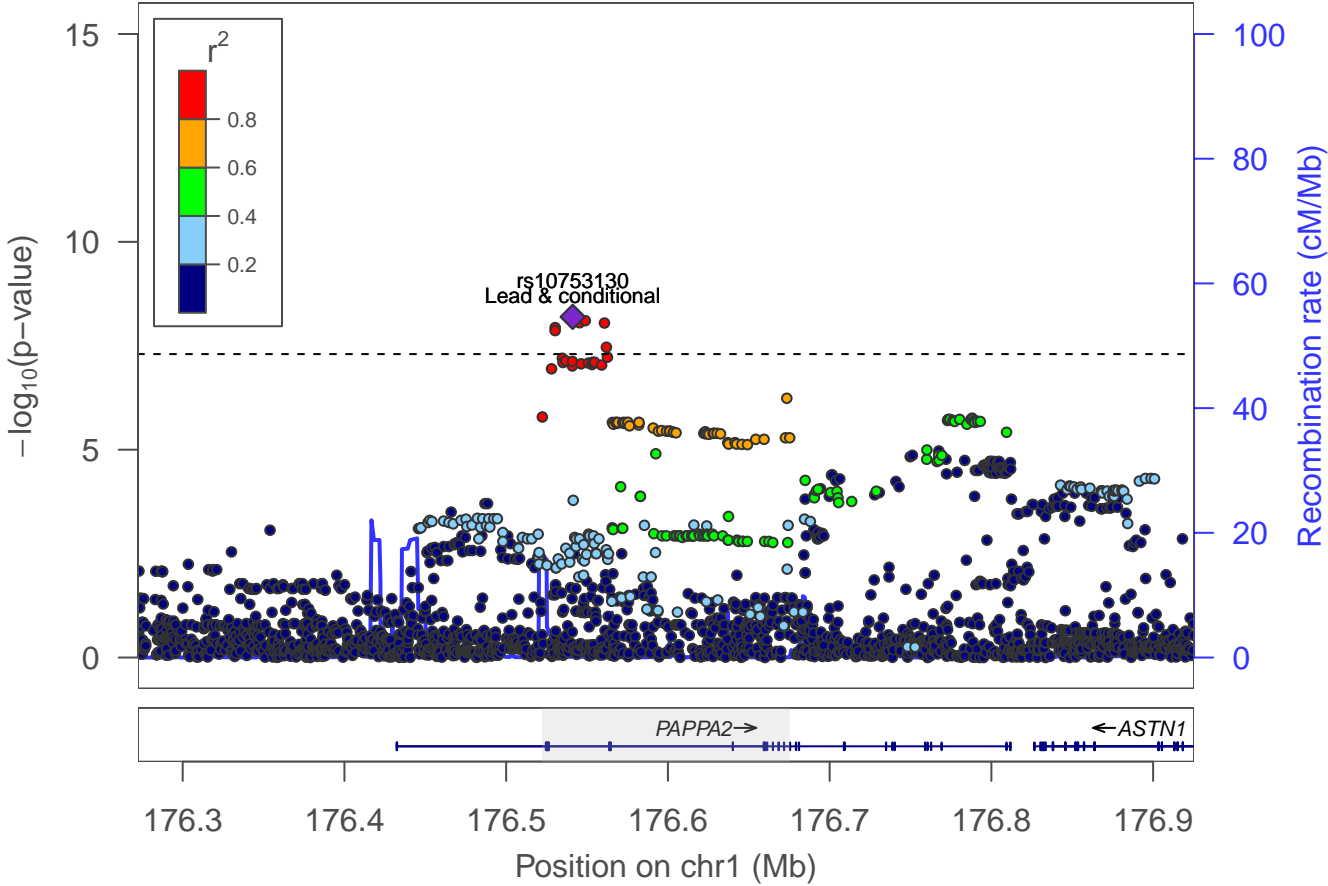

# Auto. speeding propensity: locus 3 [chr 1:207.915–208.048Mb]

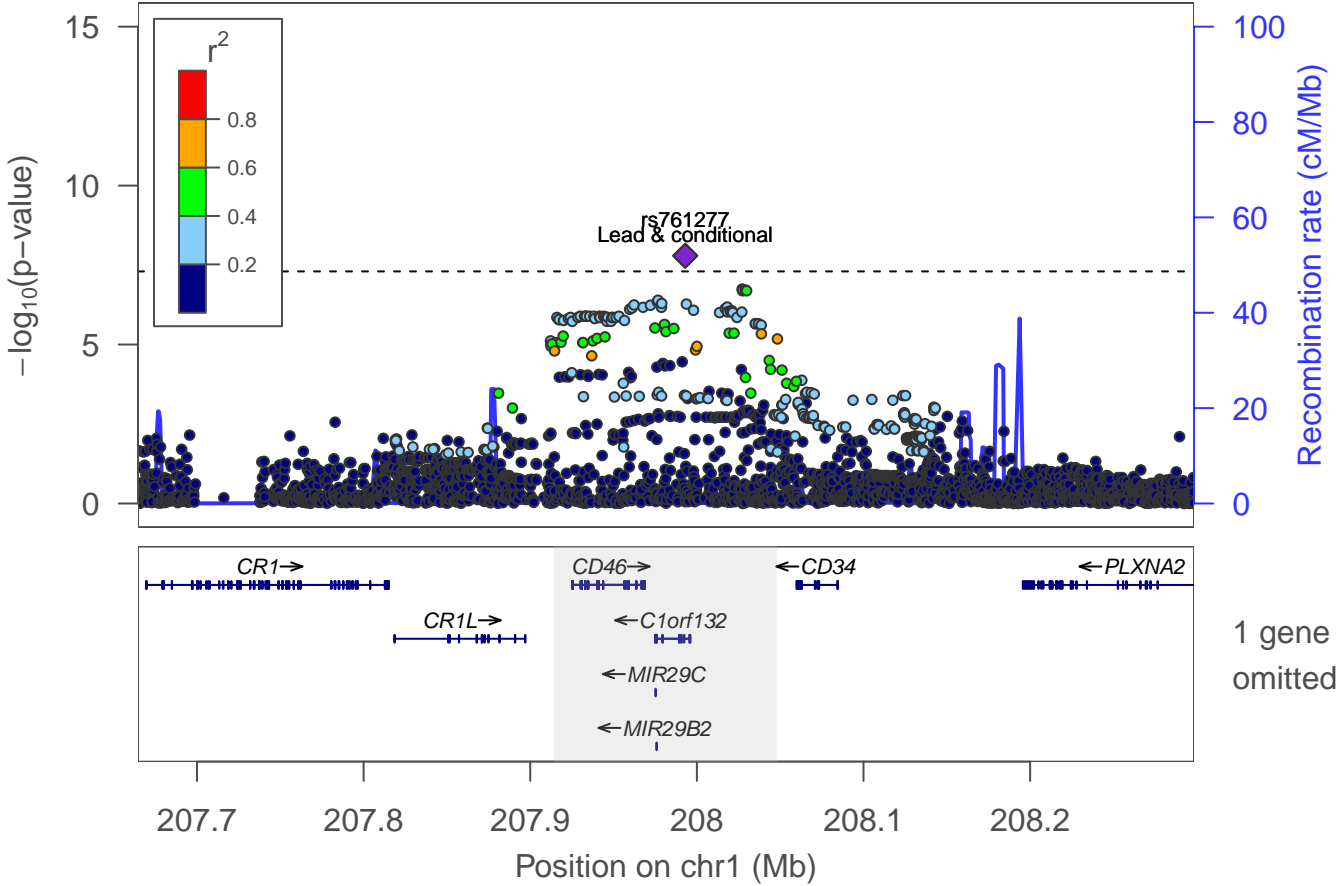

# Auto. speeding propensity: Locus 4 [chr 2: 5.831–5.895Mb]

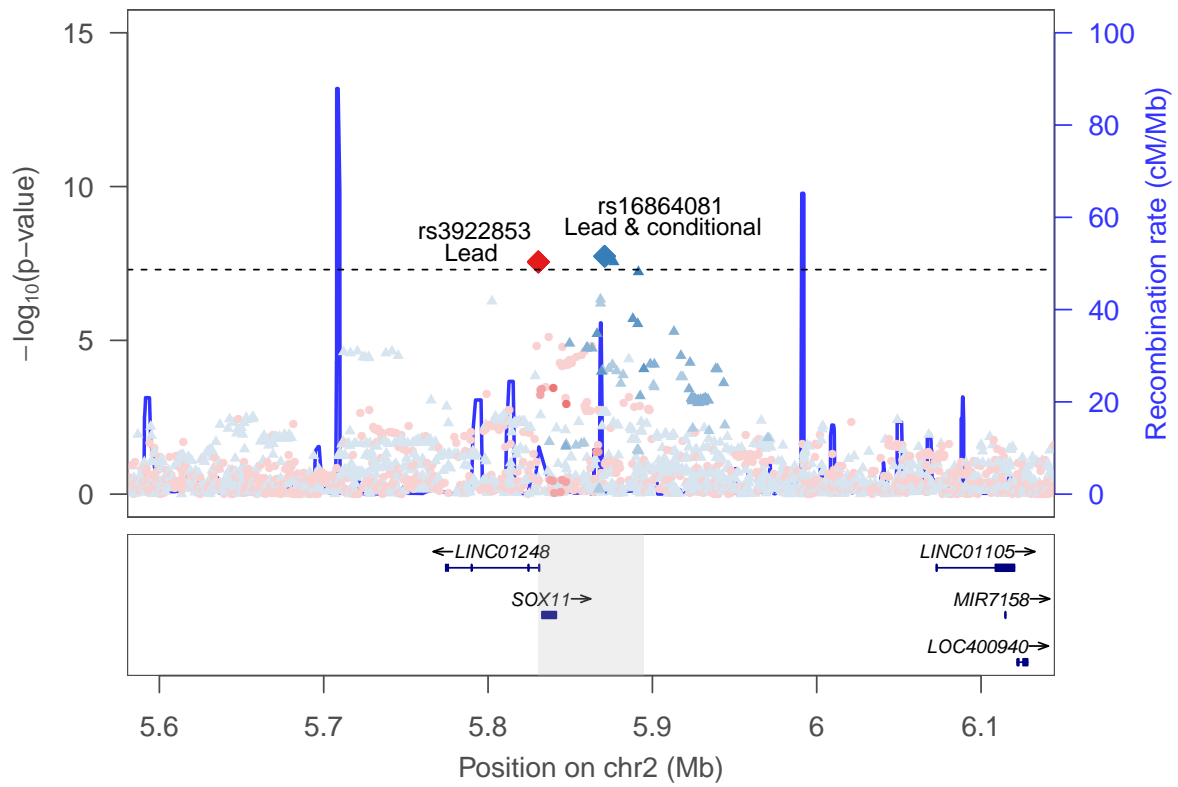

rs16864081 ▲  
rs3922853 ●

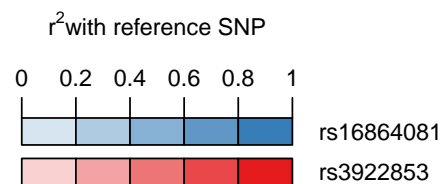

# Auto. speeding propensity: locus 5 [chr 2:155.655–156.109Mb]

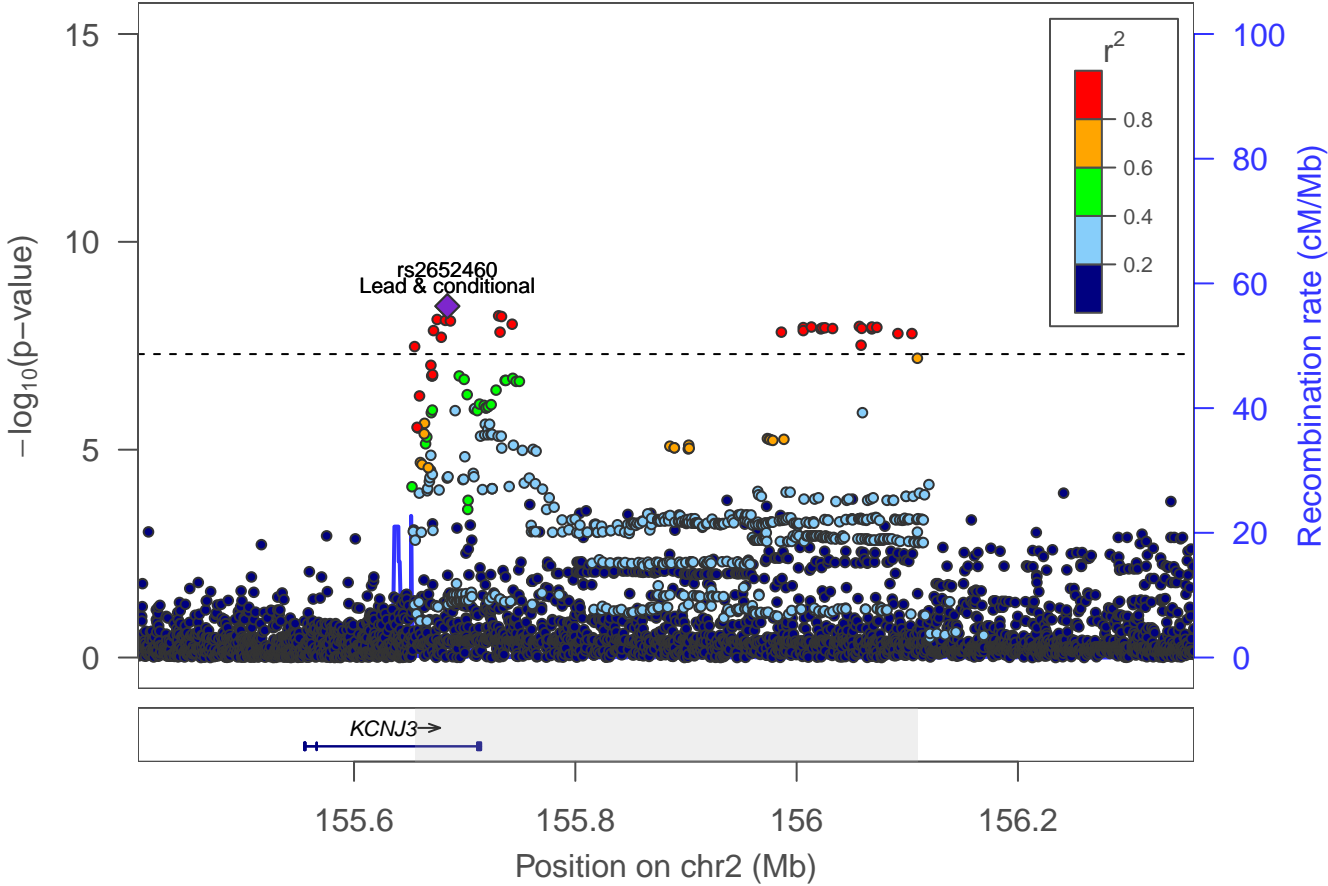

# Auto. speeding propensity: locus 6 [chr 3:52.541–52.848Mb]

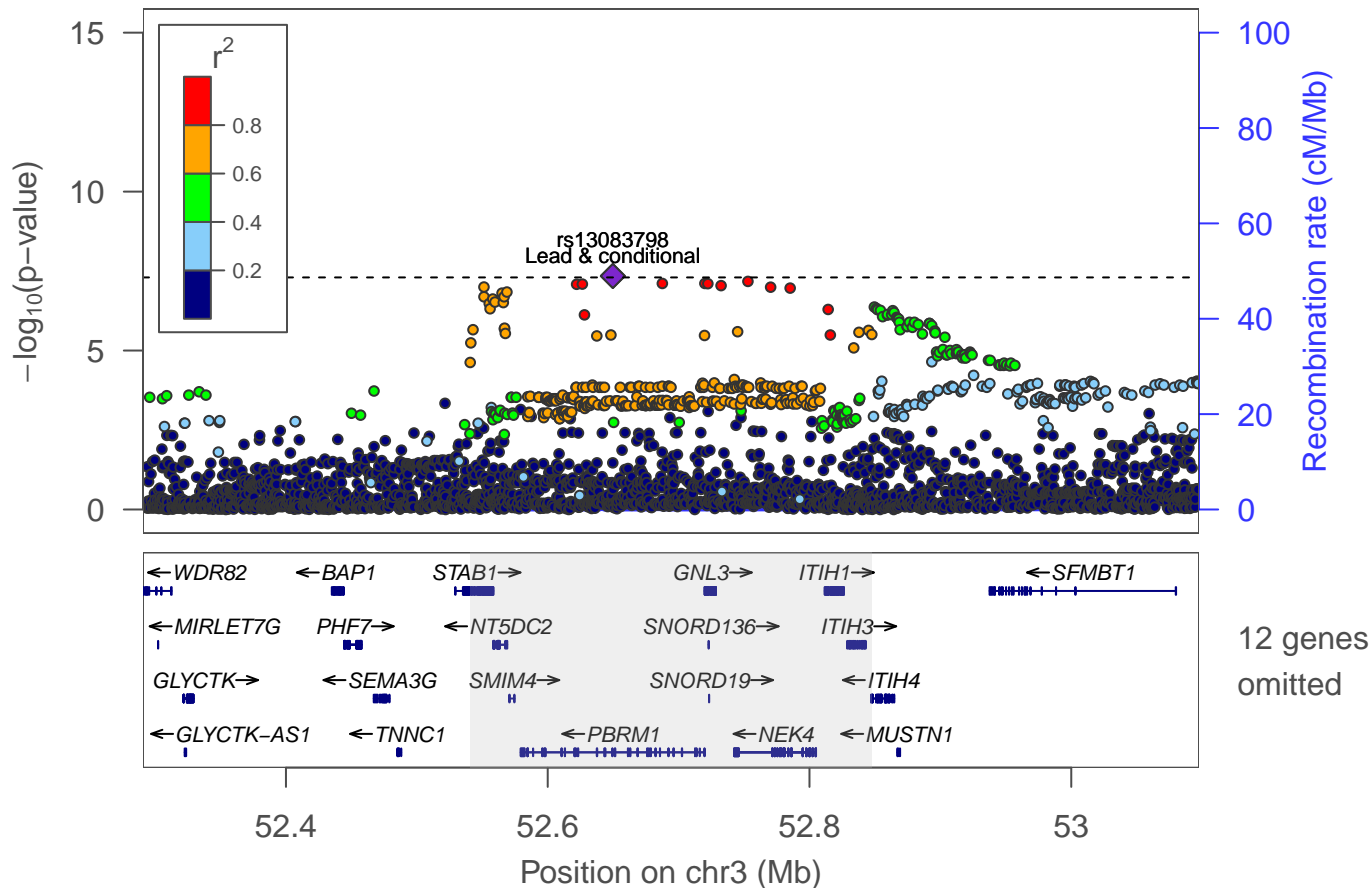

# Auto. speeding propensity: Locus 7 [chr 3: 71.026–71.160Mb]

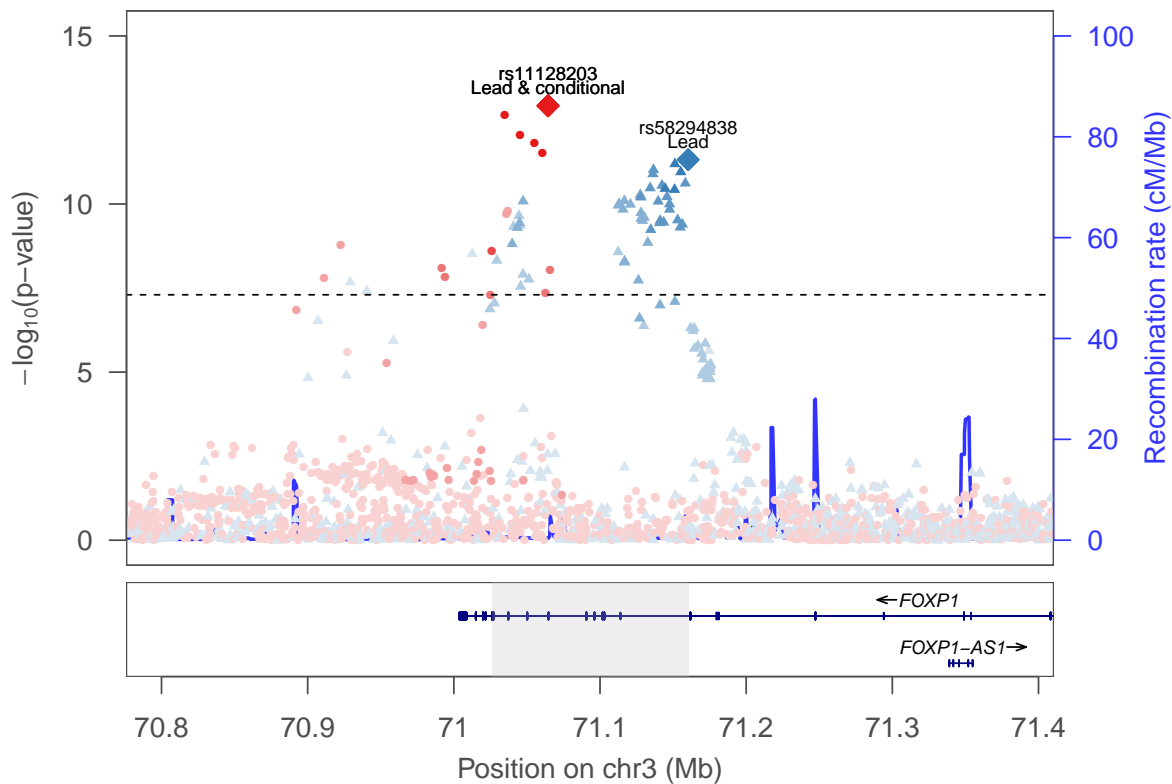

rs58294838 ▲  
rs11128203 ●

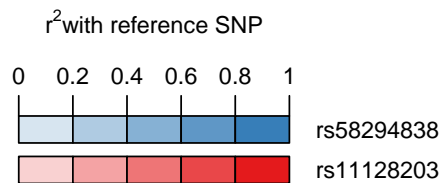



# Auto. speeding propensity: Locus 8 [chr 3: 85.072–85.672Mb]

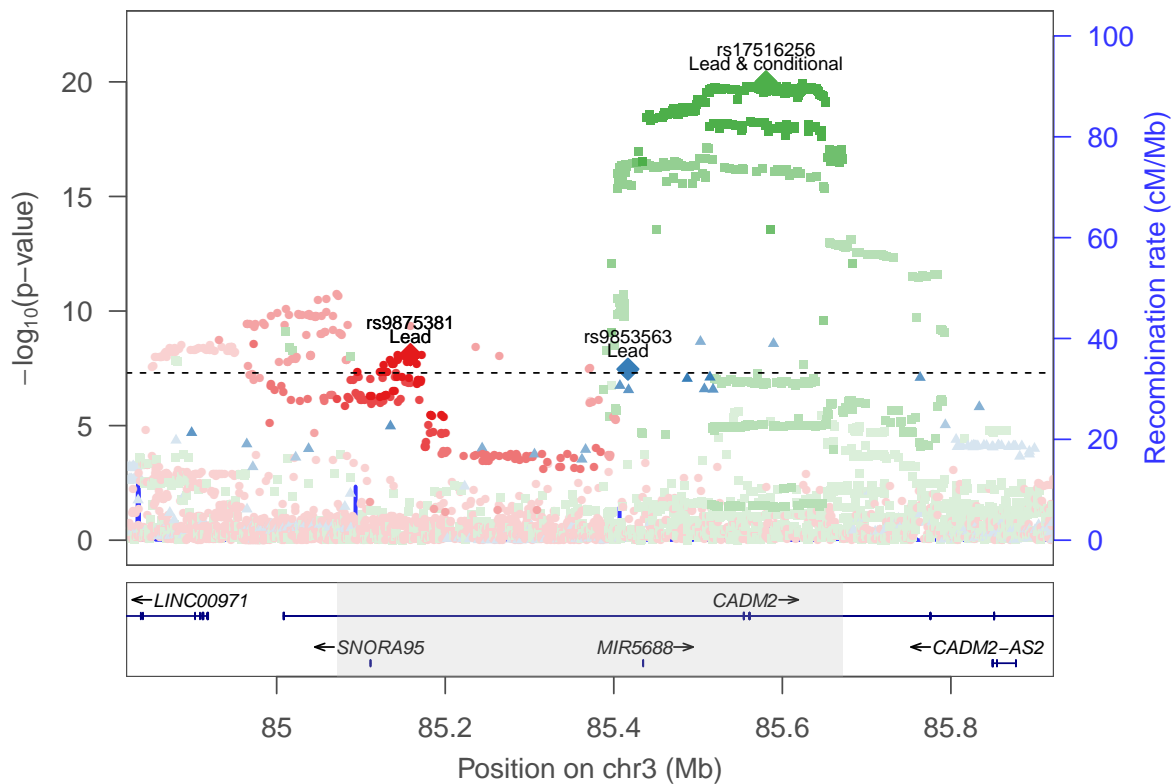

rs17516256 ■  
 rs9853563 ▲  
 rs9875381 ●

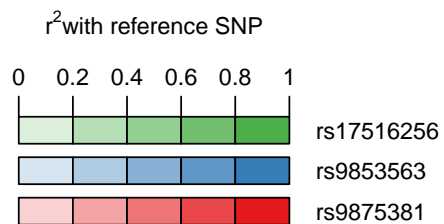

# Auto. speeding propensity: locus 9 [chr 3:143.636–143.837Mb]

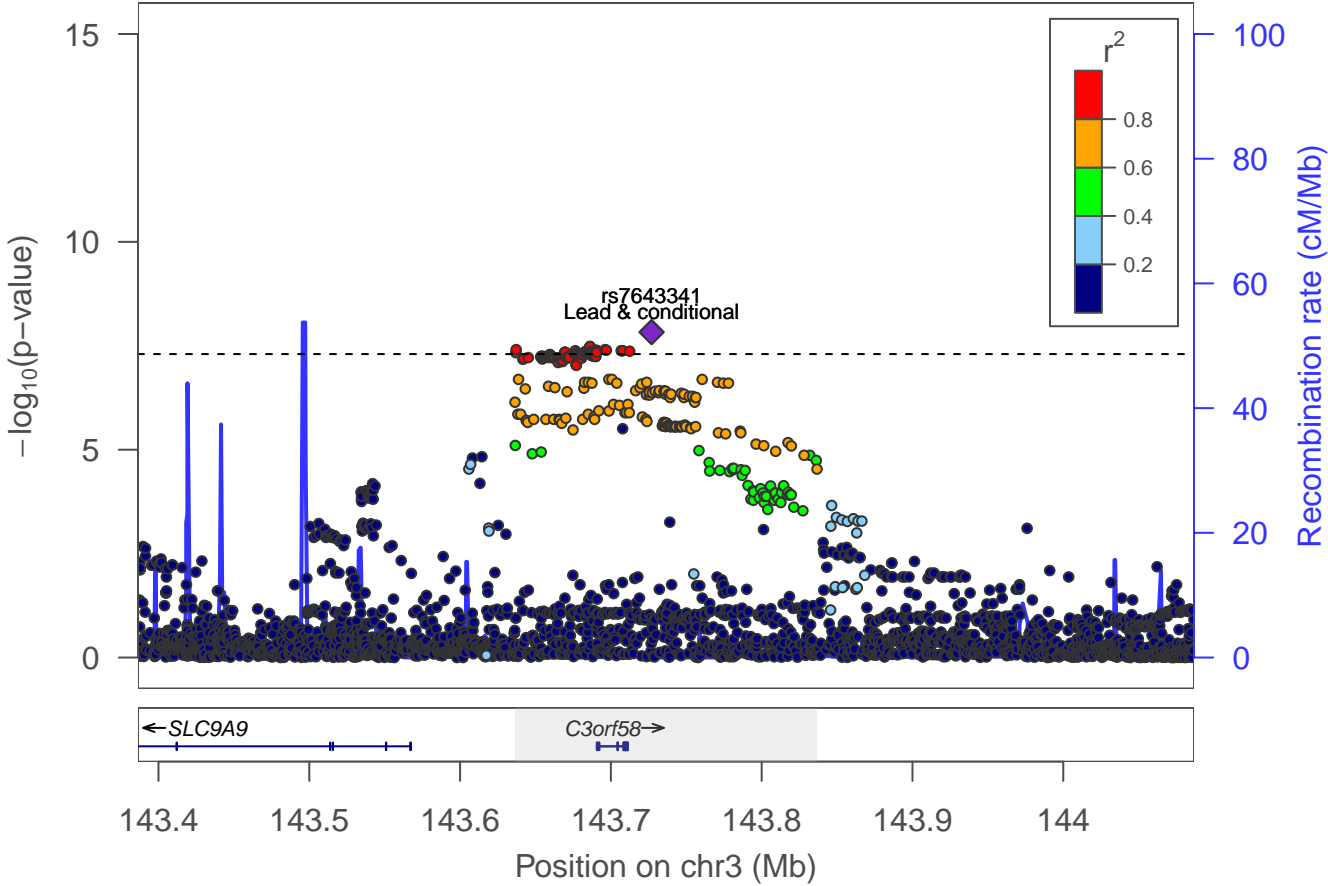

# Auto. speeding propensity: locus 10 [chr 4:3.242–3.273Mb]

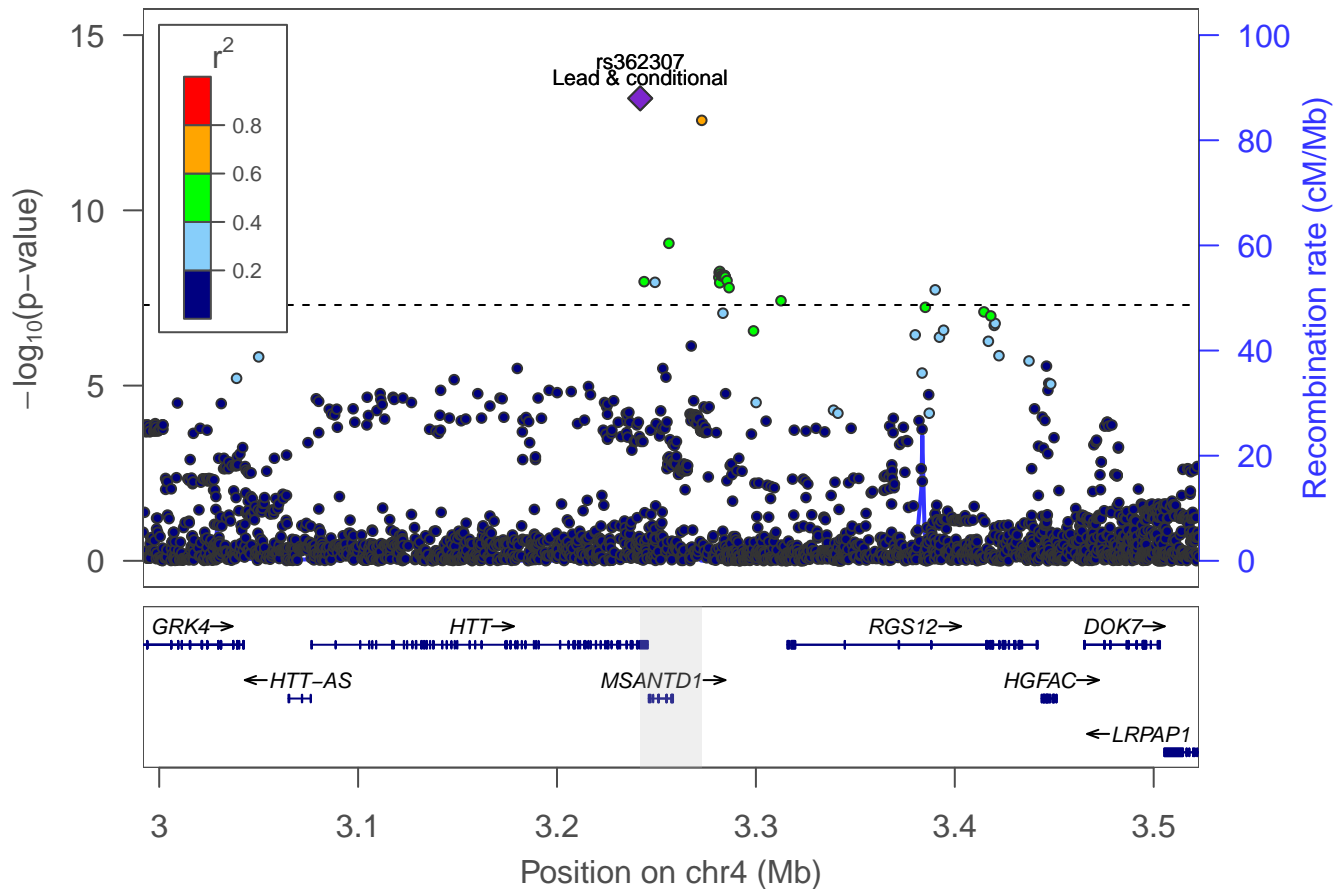

# Auto. speeding propensity: locus 11 [chr 4:57.745–57.900Mb]

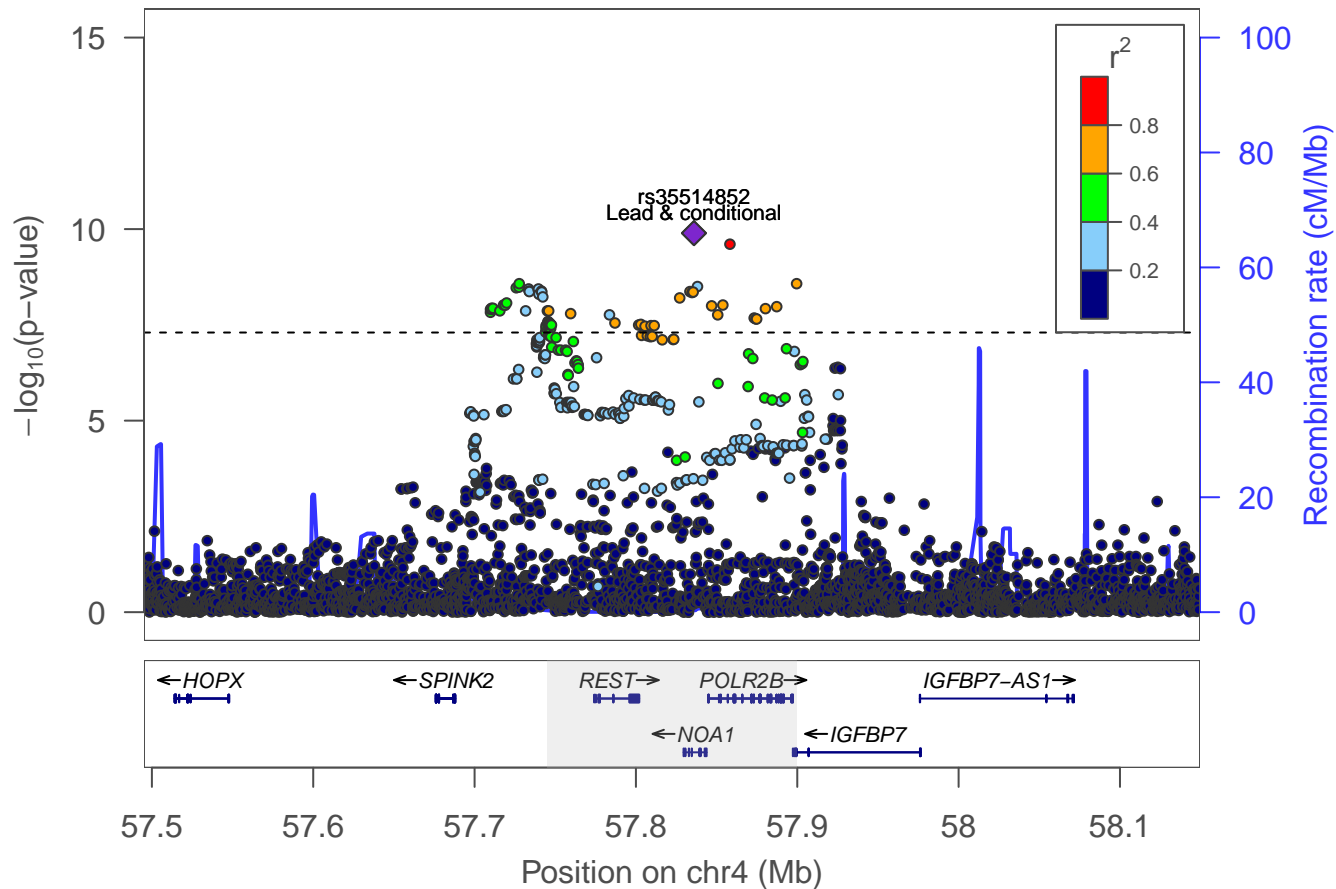

# Auto. speeding propensity: locus 12 [chr 5:50.742–50.974Mb]

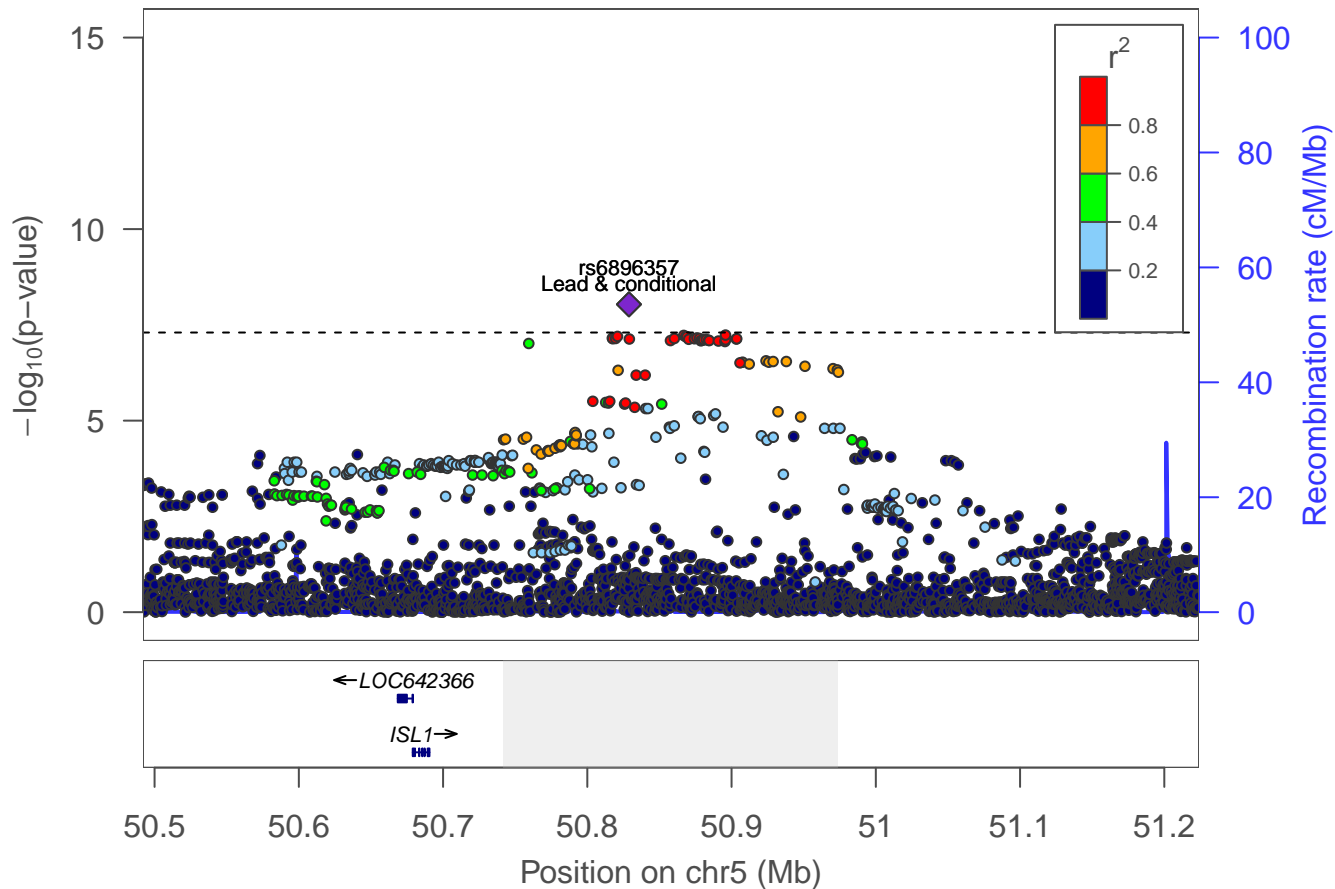

# Auto. speeding propensity: Locus 13 [chr 6: 19.024–19.191Mb]

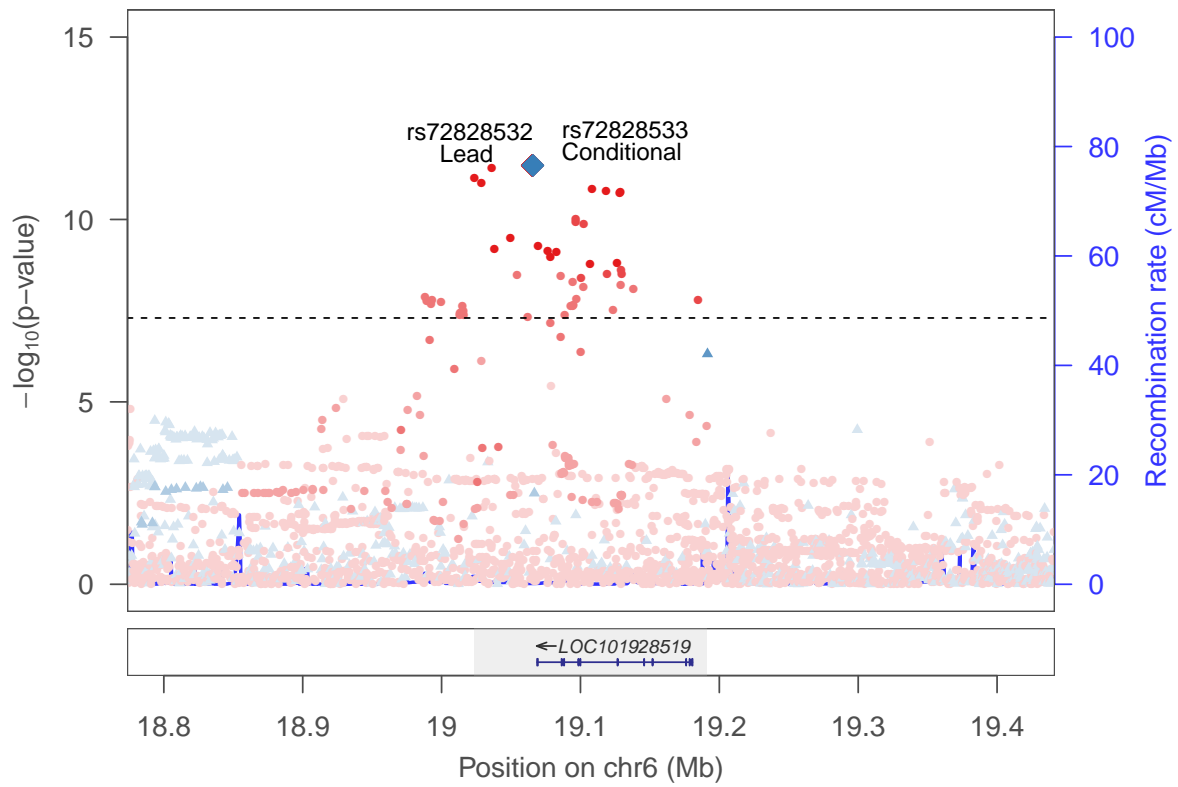

rs72828533 ▲  
rs72828532 ●

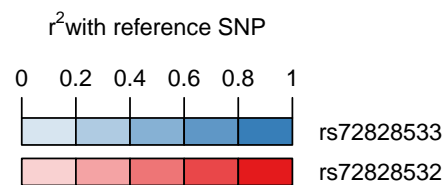

# Auto. speeding propensity: locus 14 [chr 6:31.083–31.093Mb]

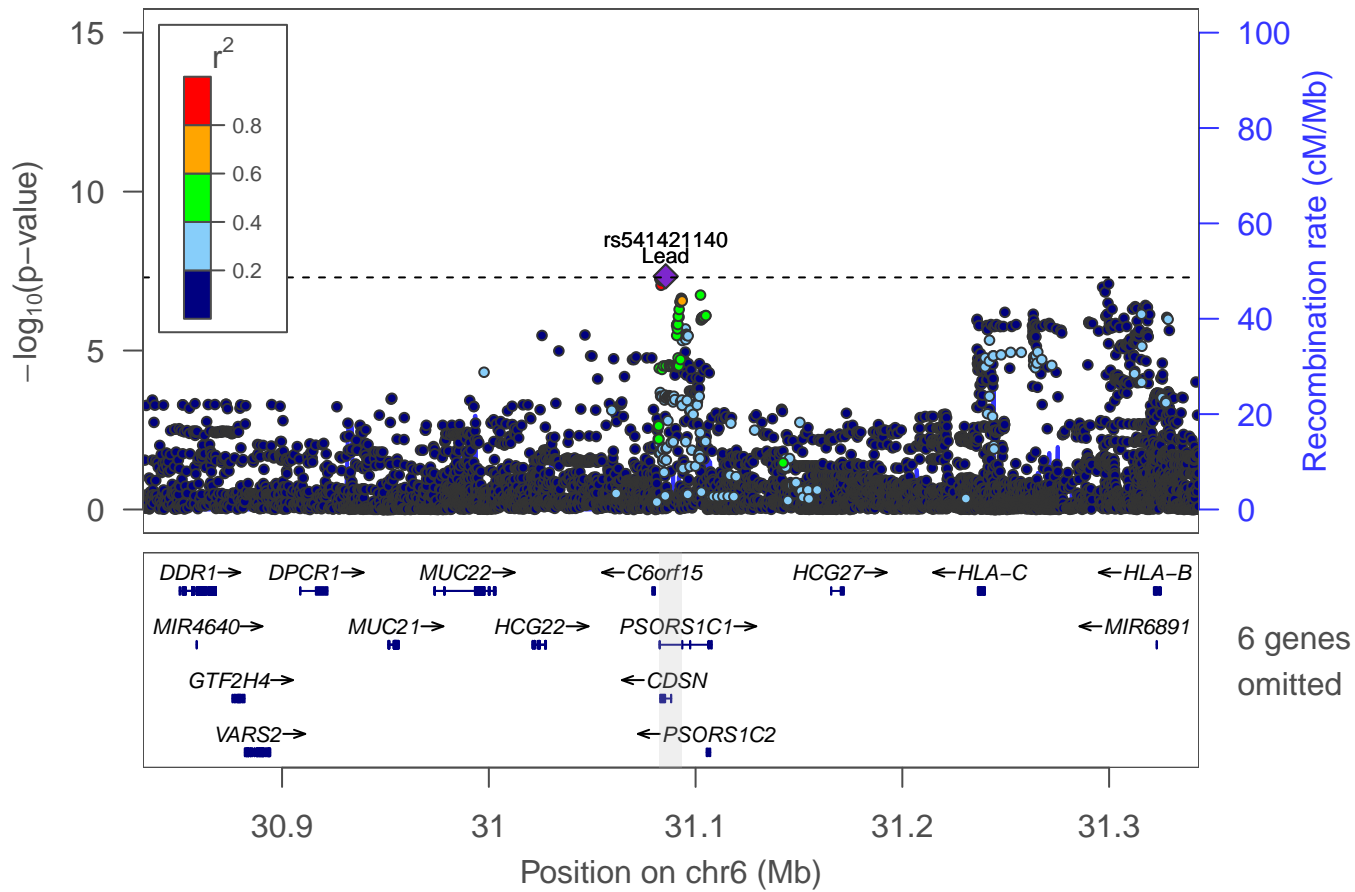

# Auto. speeding propensity: Locus 15 [chr 6: 31.893–32.095Mb]

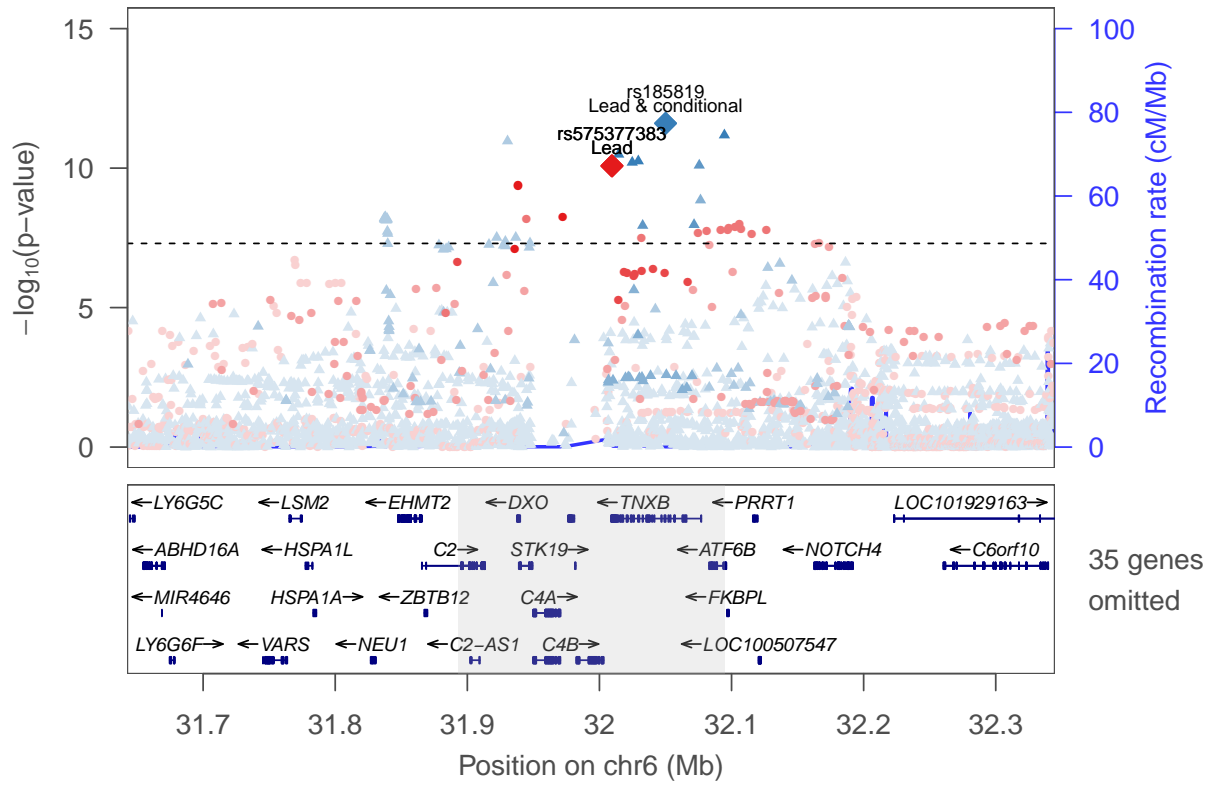

rs185819 ▲  
 rs575377383 ●

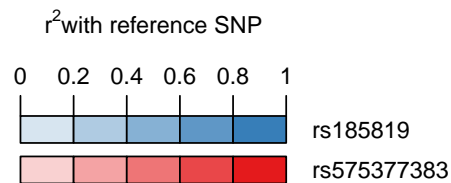



# Auto. speeding propensity: Locus 16 [chr 6: 32.429–32.665Mb]

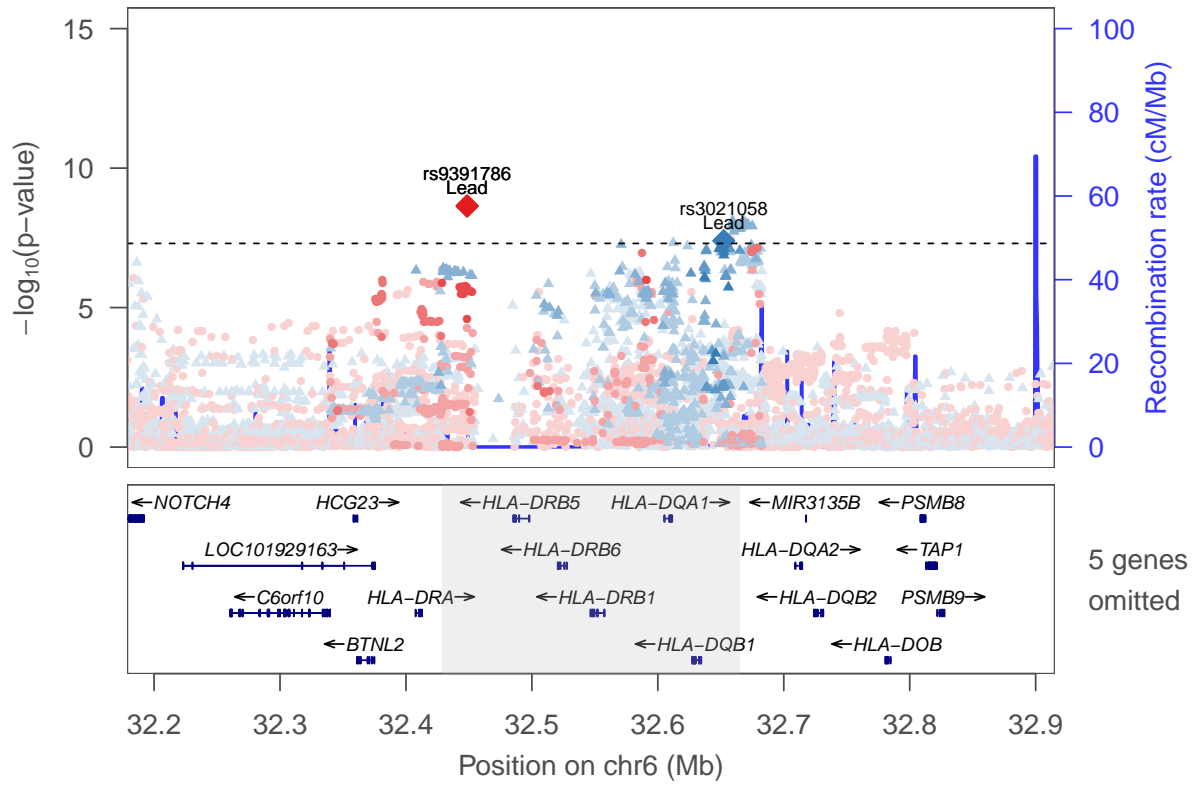

rs3021058 ▲  
 rs9391786 ●

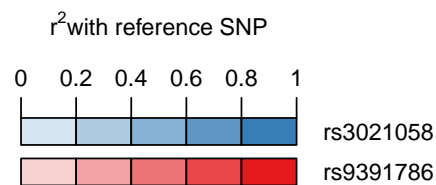

# Auto. speeding propensity: locus 17 [chr 6:43.146–43.234Mb]

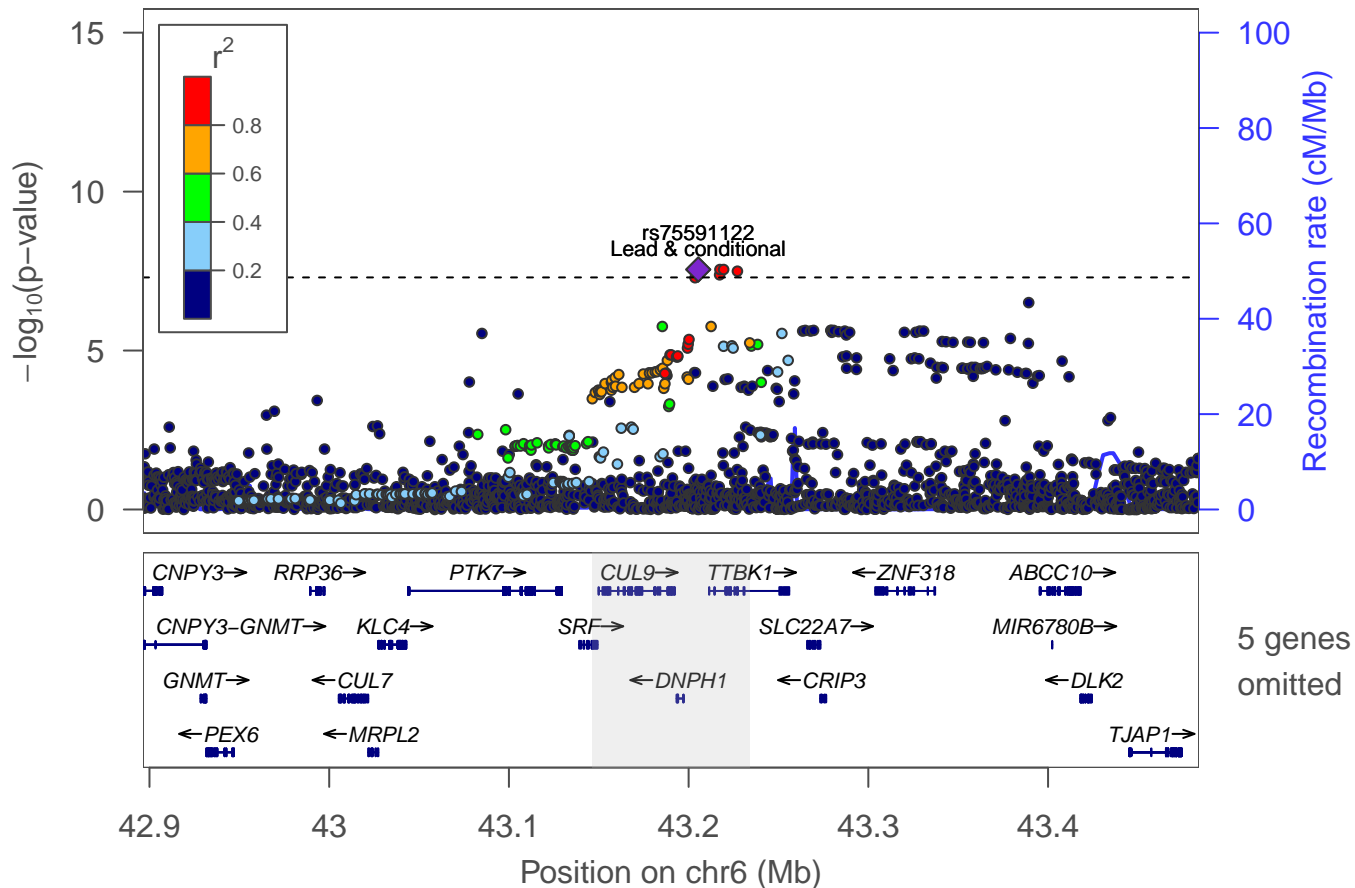

# Auto. speeding propensity: locus 18 [chr 6:98.298–98.547Mb]

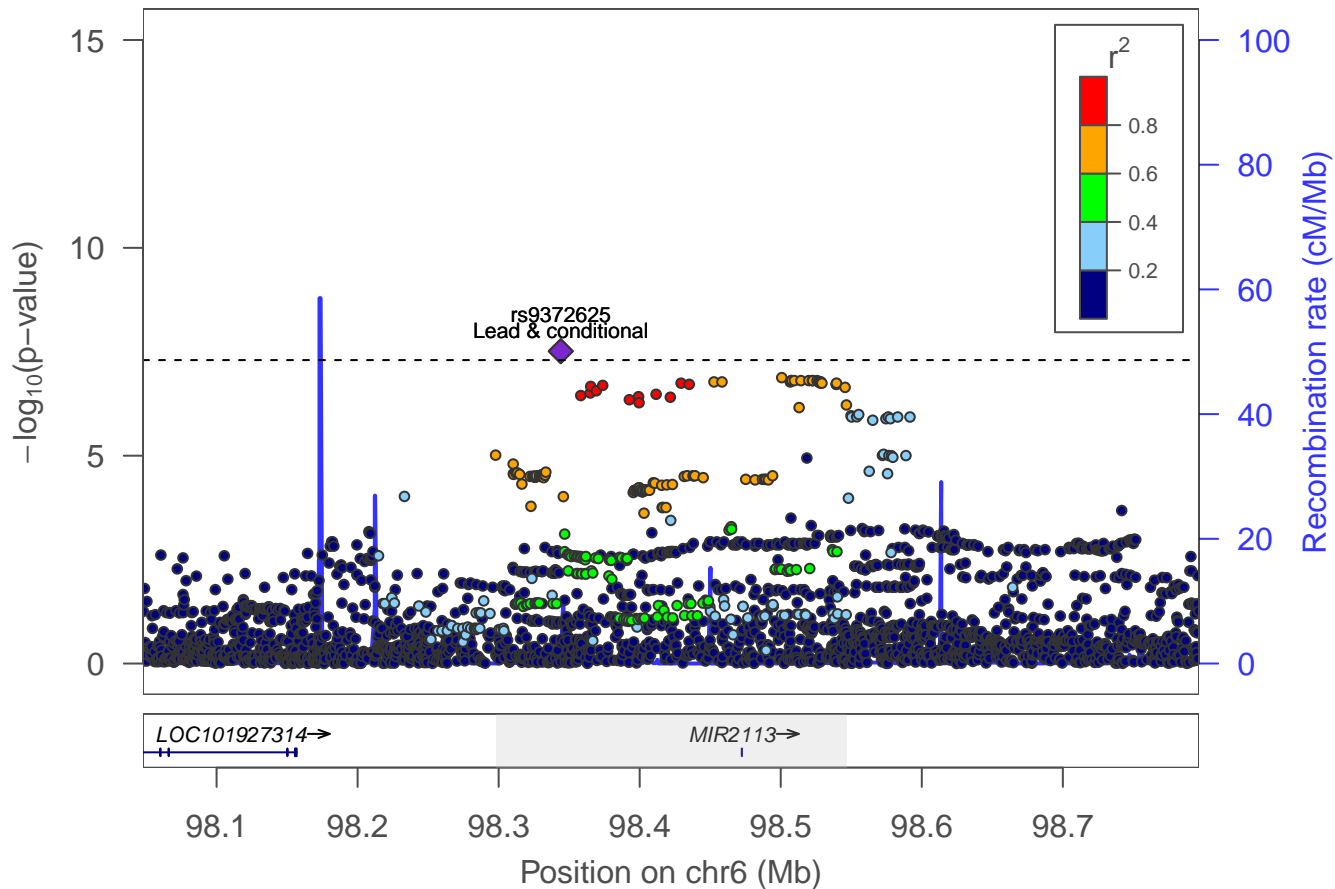

# Auto. speeding propensity: locus 19 [chr 8:10.788–11.450Mb]

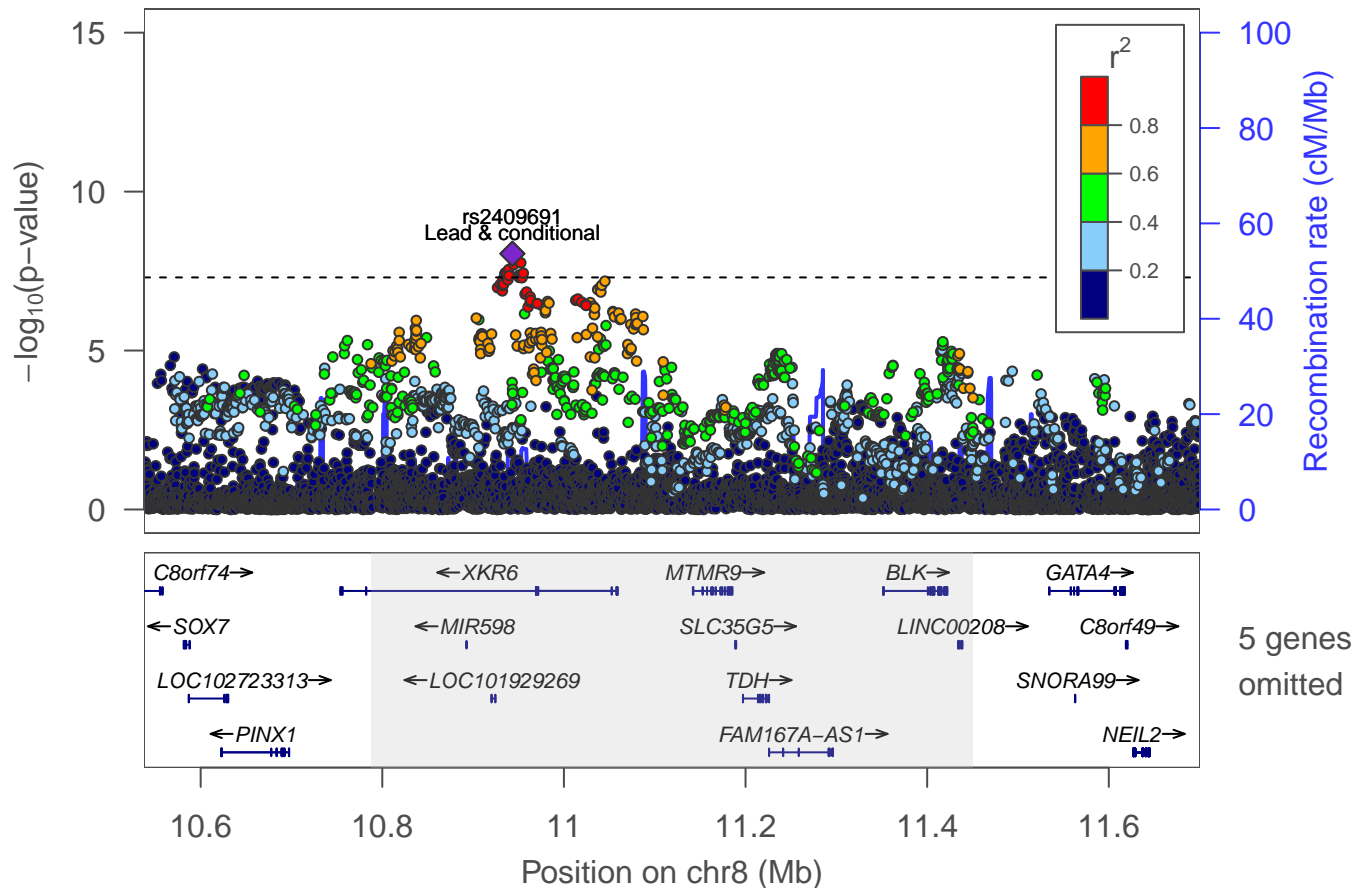

# Auto. speeding propensity: locus 20 [chr 8:65.465–65.746Mb]

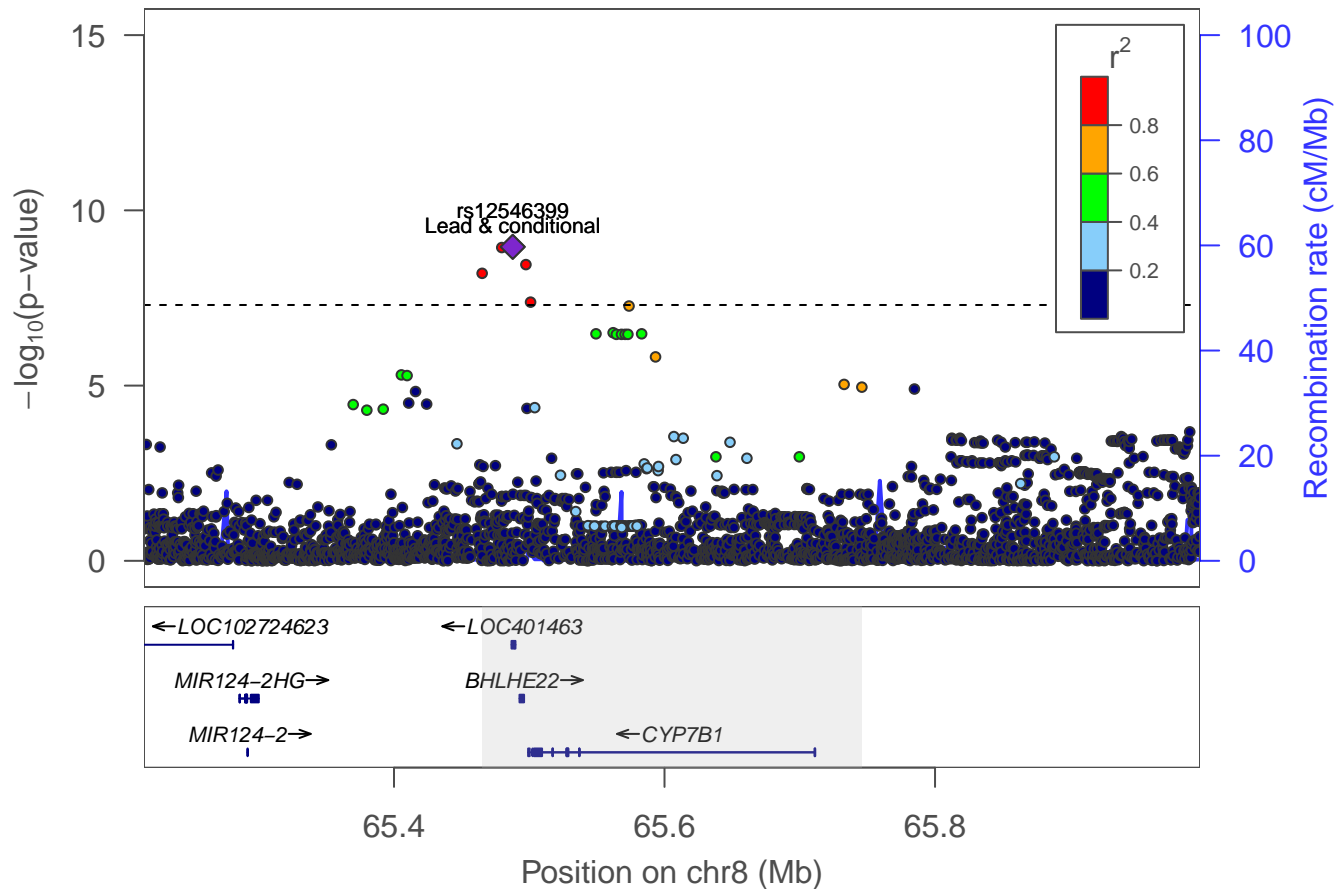

# Auto. speeding propensity: locus 21 [chr 8:143.626–143.657Mb]

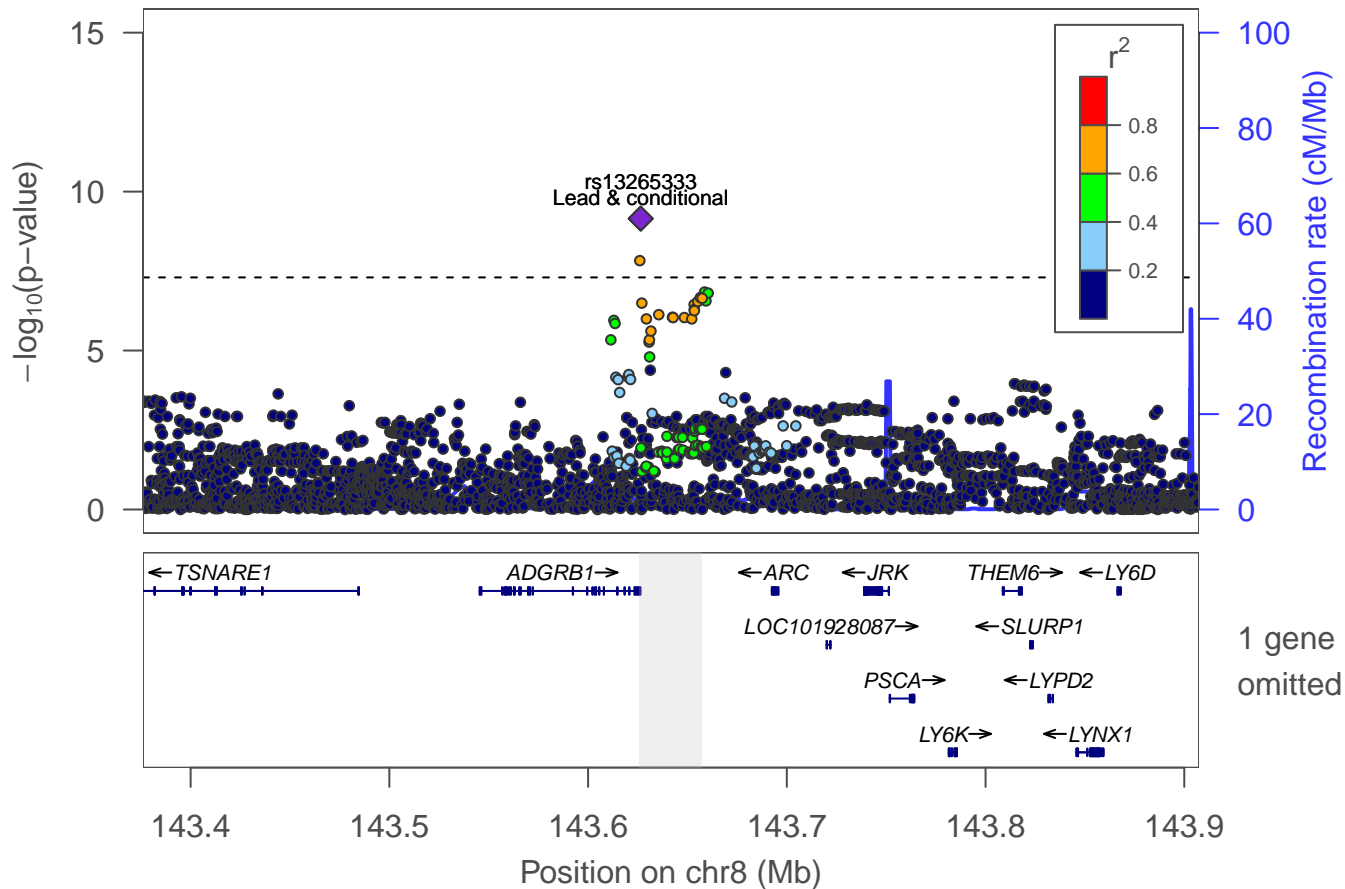

# Auto. speeding propensity: locus 22 [chr 9:92.178–92.225Mb]

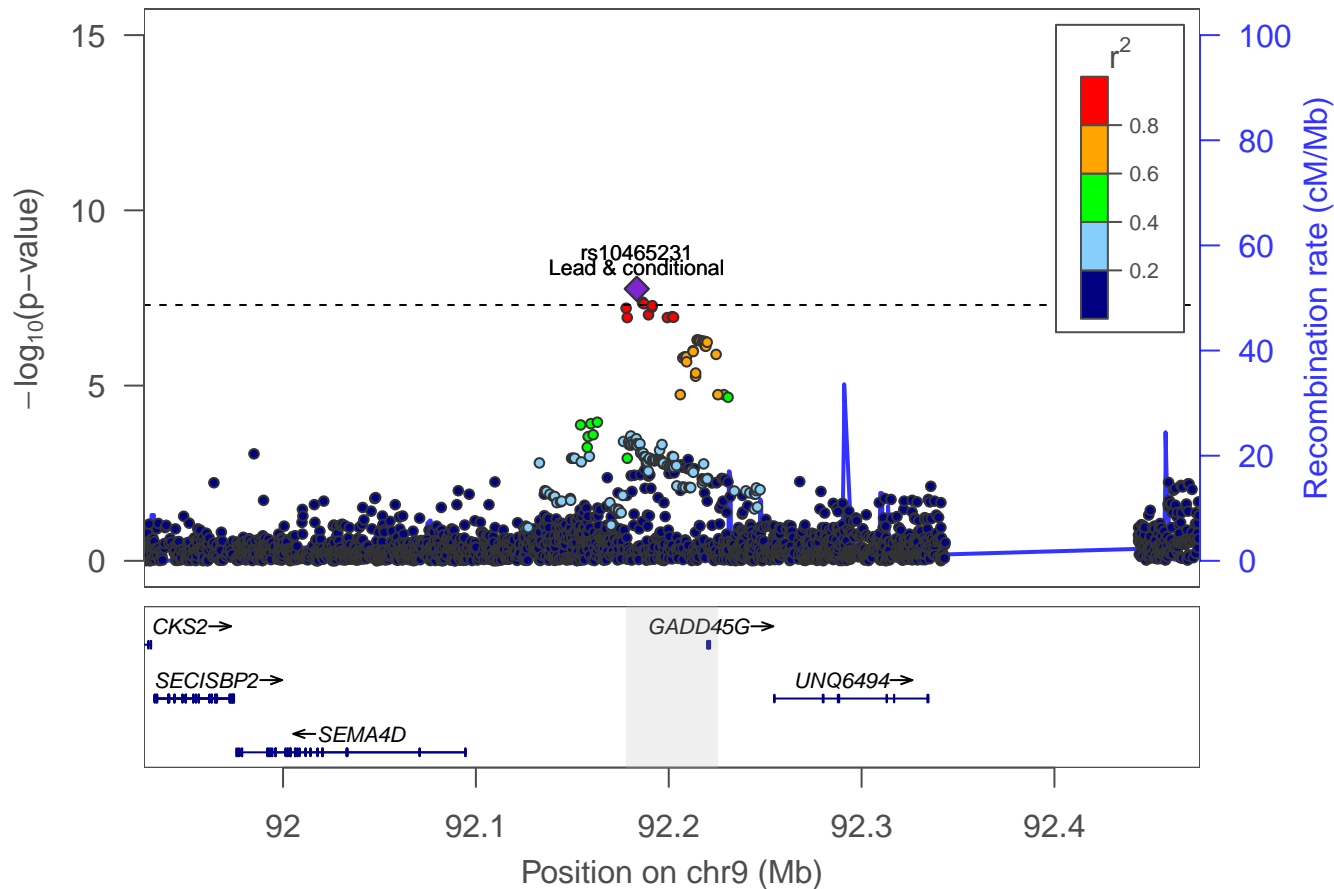

# Auto. speeding propensity: locus 23 [chr 10:63.558–63.579Mb]

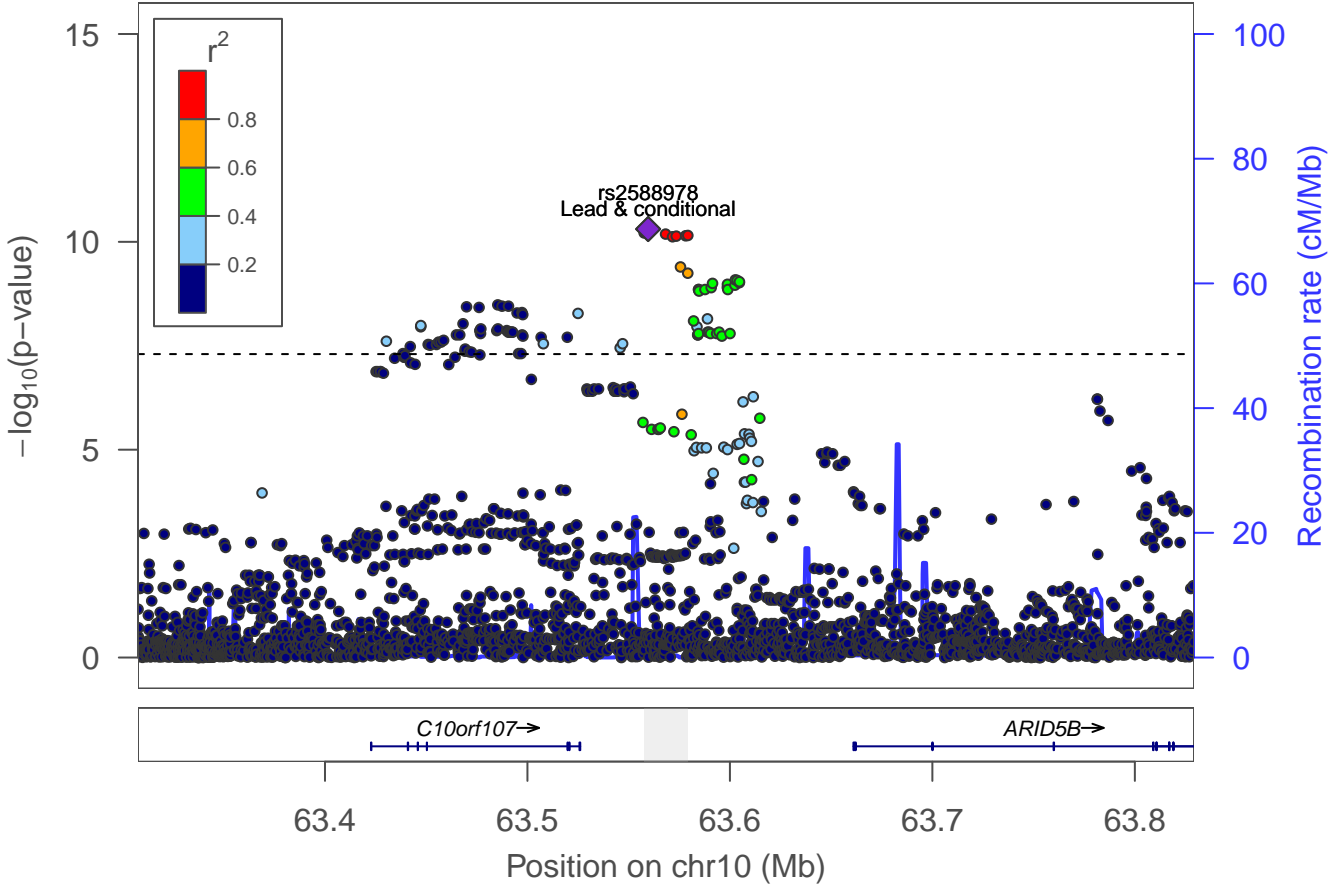



# Auto. speeding propensity: locus 24 [chr 11:30.608–30.620Mb]

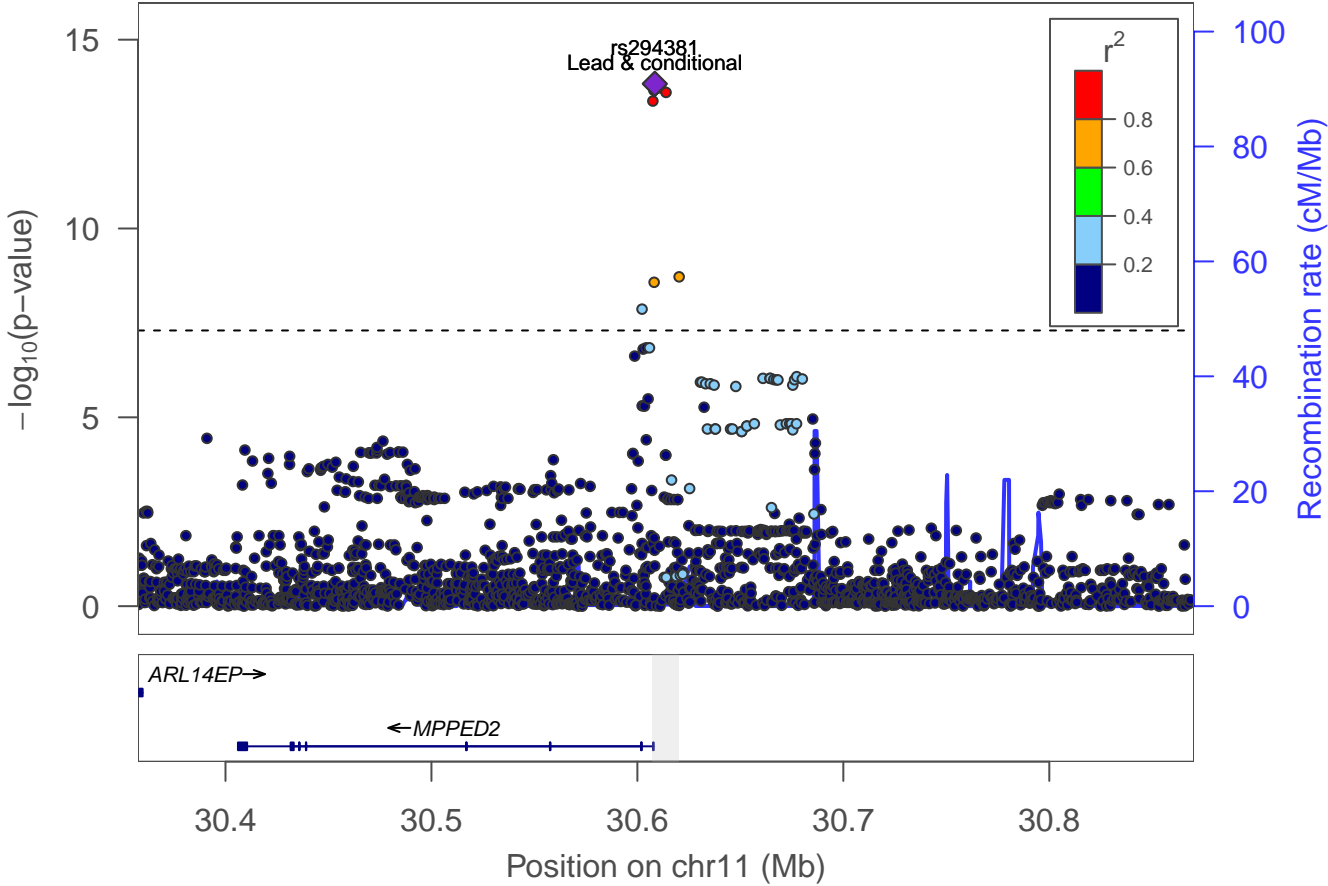

# Auto. speeding propensity: locus 25 [chr 12:23.016–23.076Mb]

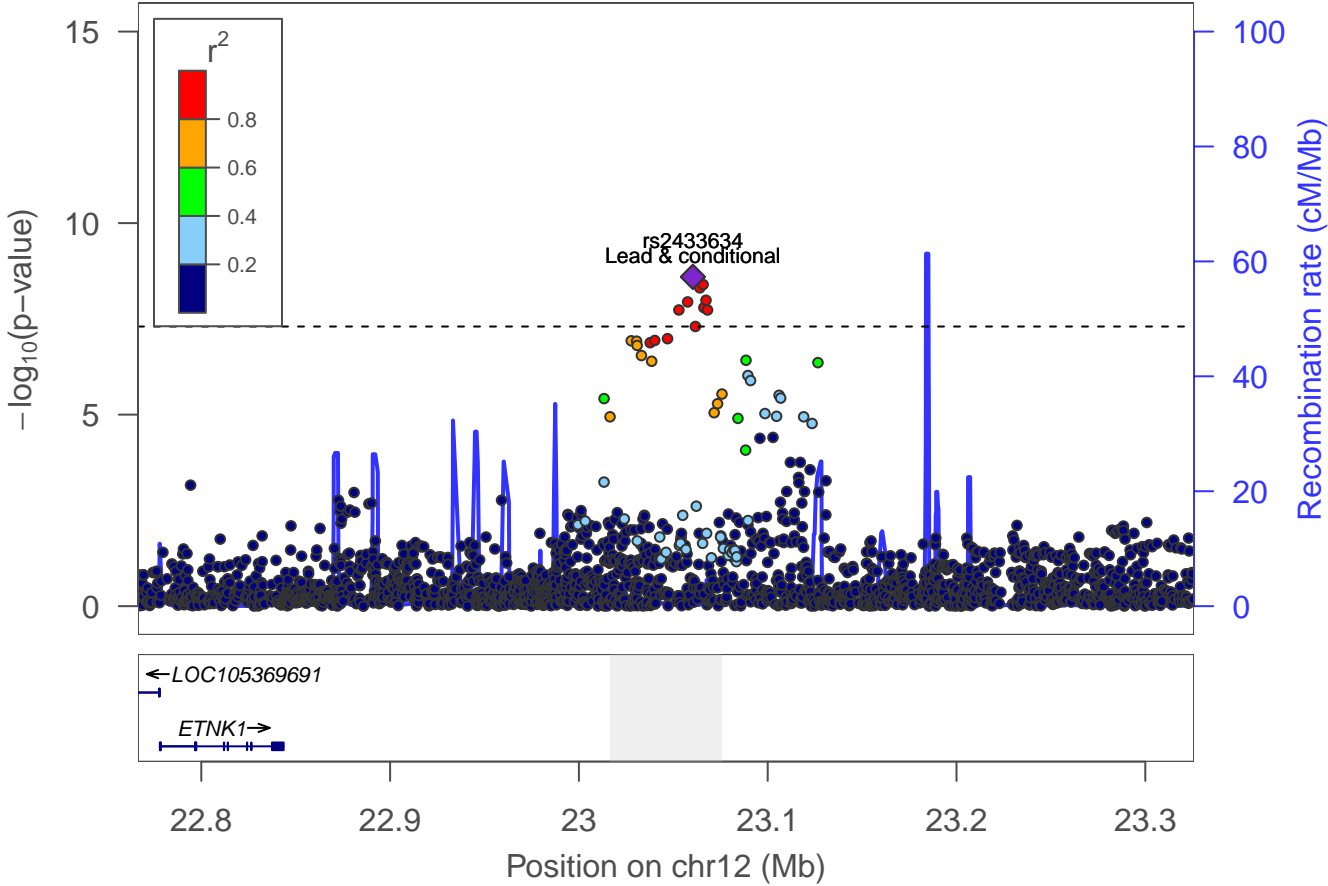

# Auto. speeding propensity: locus 26 [chr 12:90.125–90.228Mb]

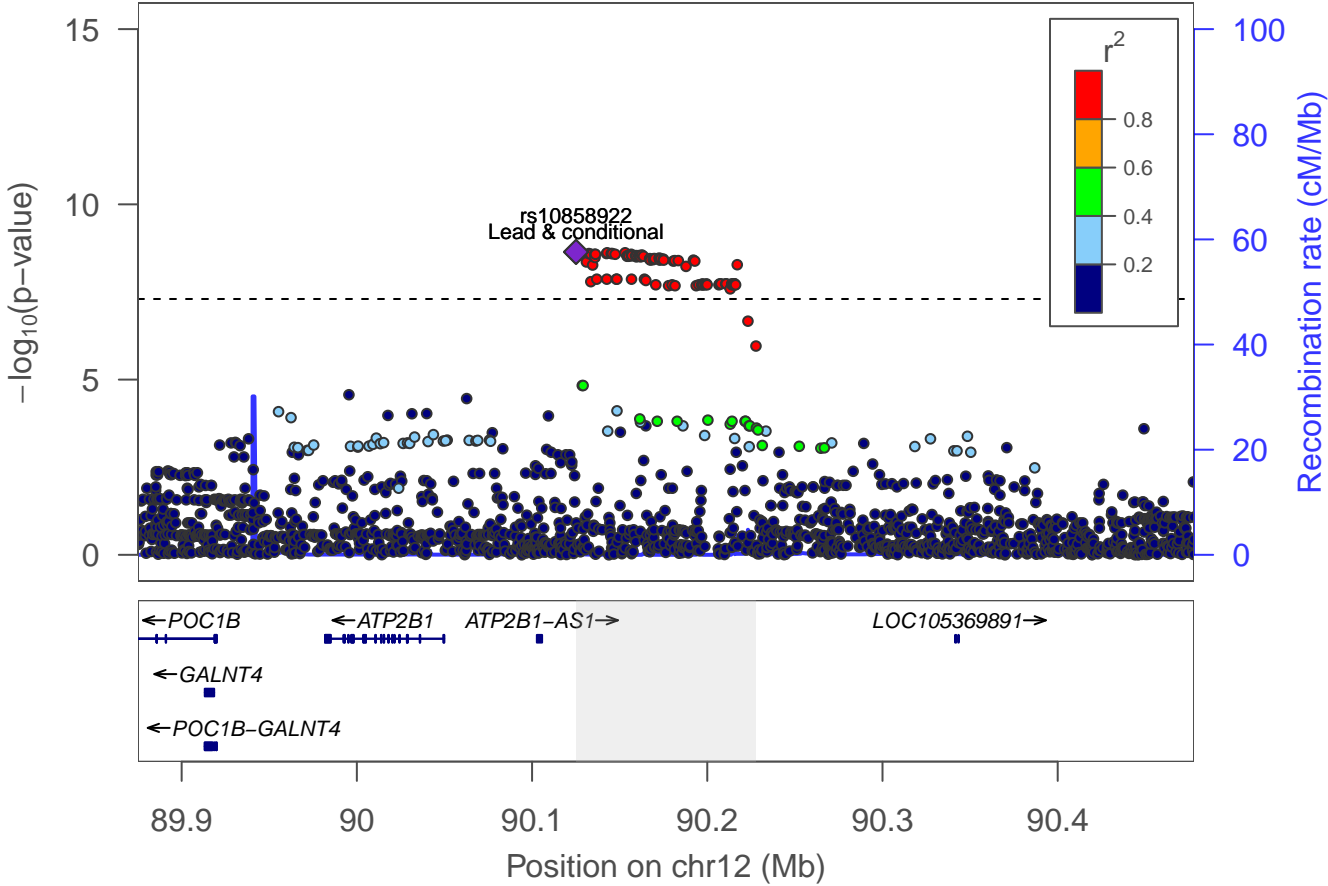

auto. speeding propensity: Locus 27 [chr 12: 110.508–111.251Mk

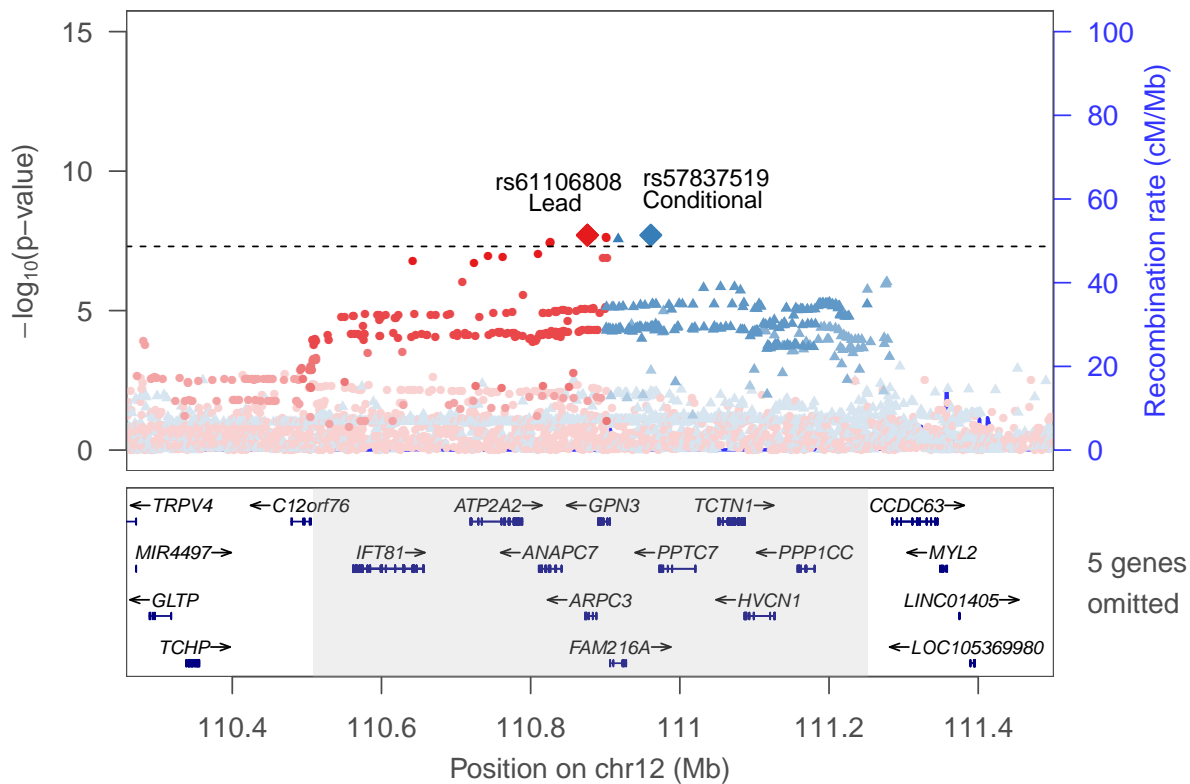

rs57837519 ▲  
rs61106808 ●

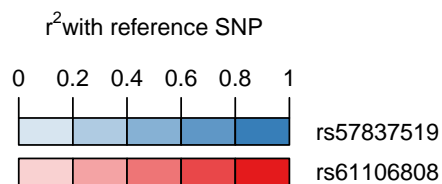

# Auto. speeding propensity: locus 28 [chr 16:59.242–59.454Mb]

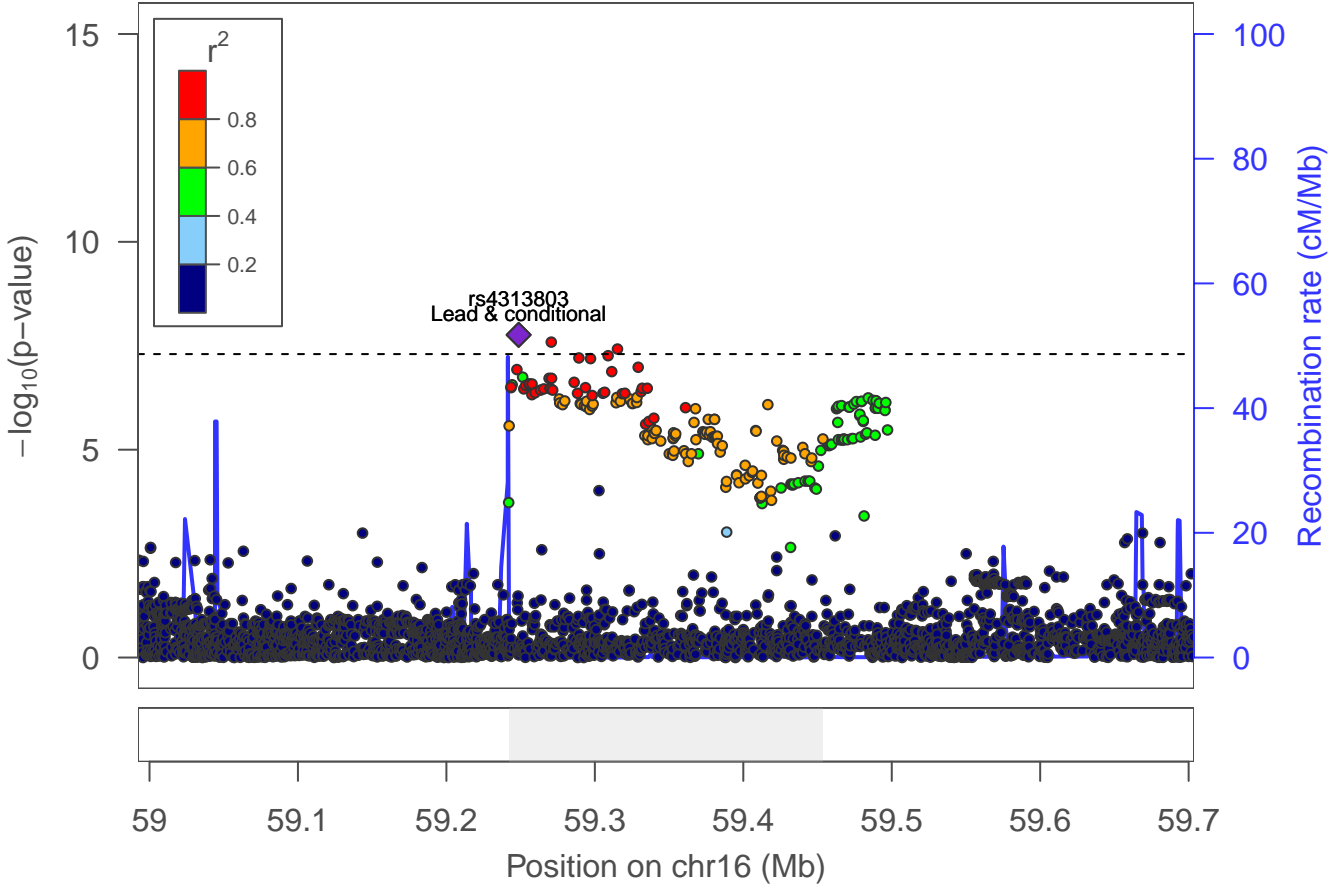

# Auto. speeding propensity: locus 29 [chr 16:62.038–62.194Mb]

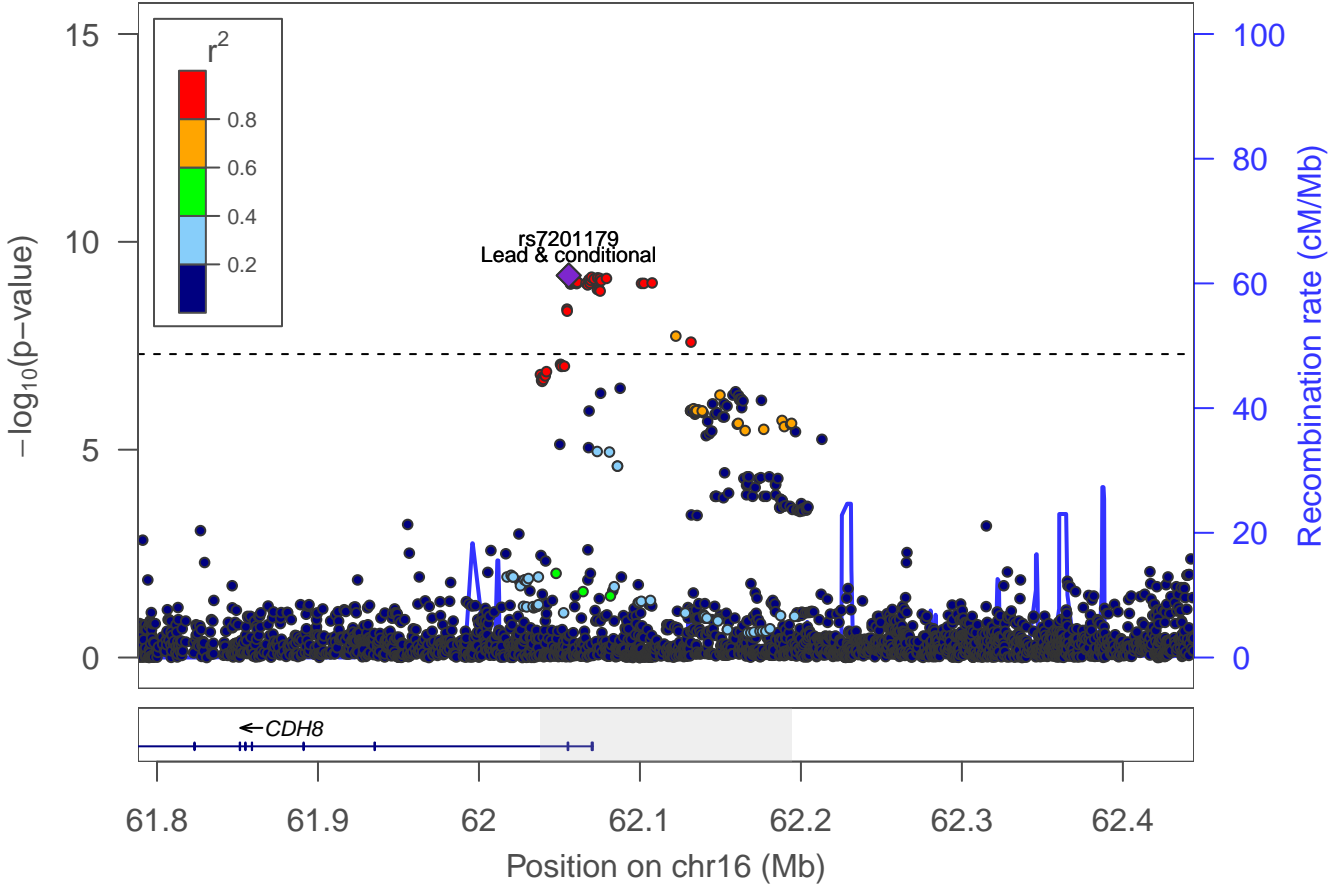

# Auto. speeding propensity: locus 30 [chr 17:43.463–44.865Mb]

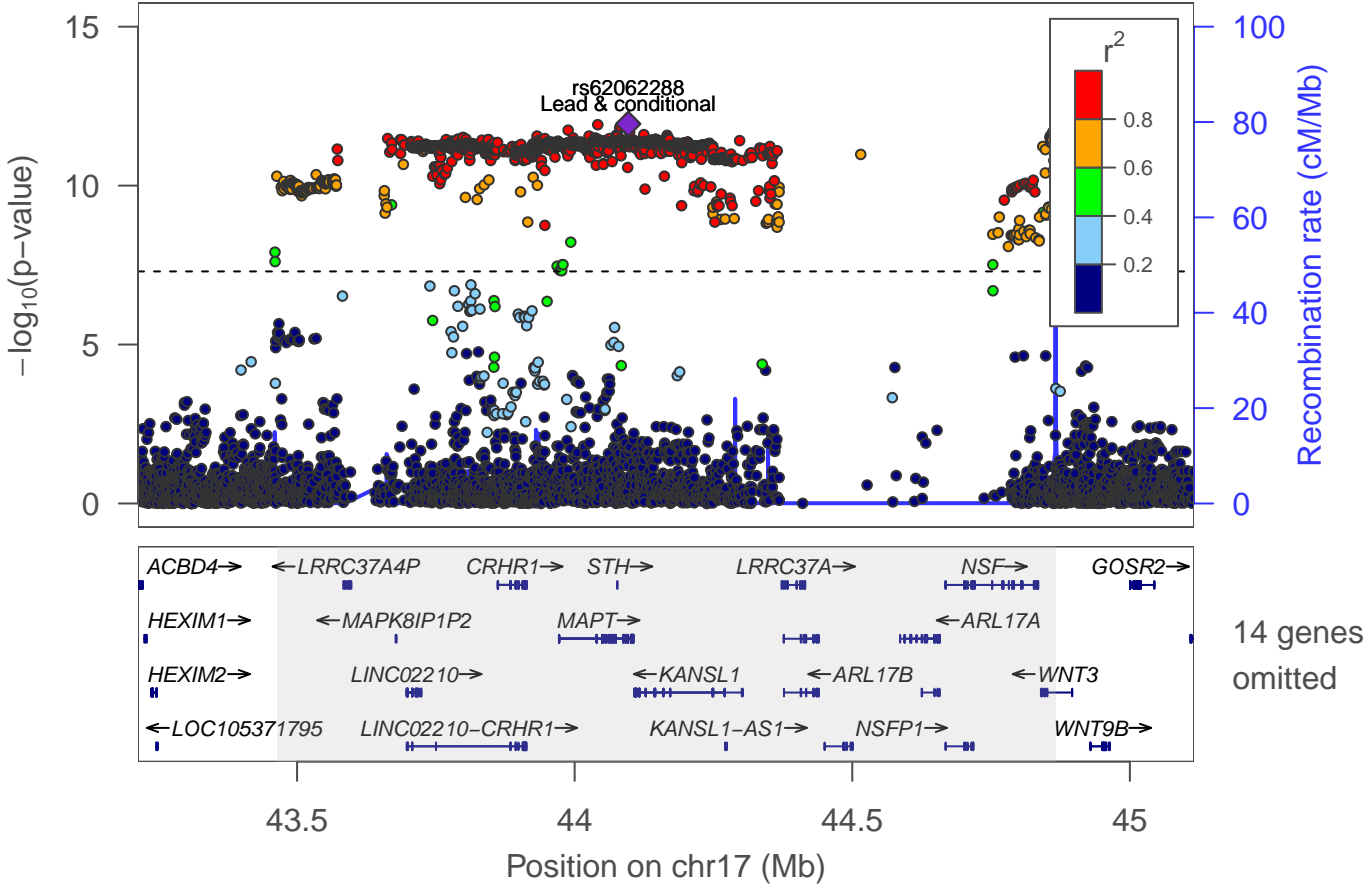

# Auto. speeding propensity: Locus 31 [chr 17: 46.958–47.048Mb]

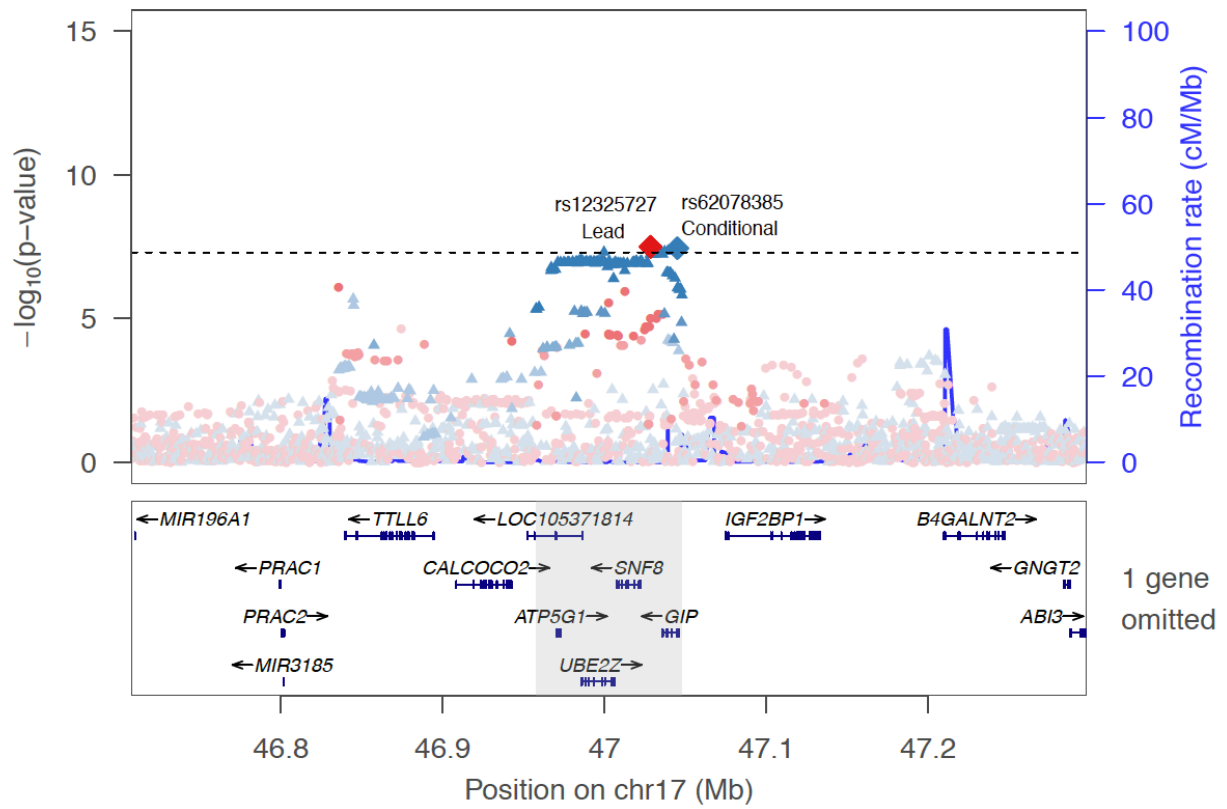

rs62078385 ▲  
 rs12325727 ●

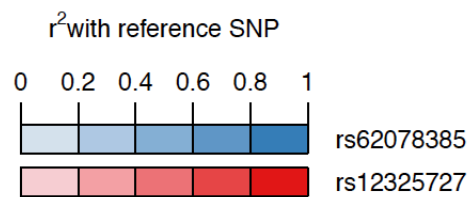



# Auto. speeding propensity: locus 32 [chr 18:46.198–46.205Mb]

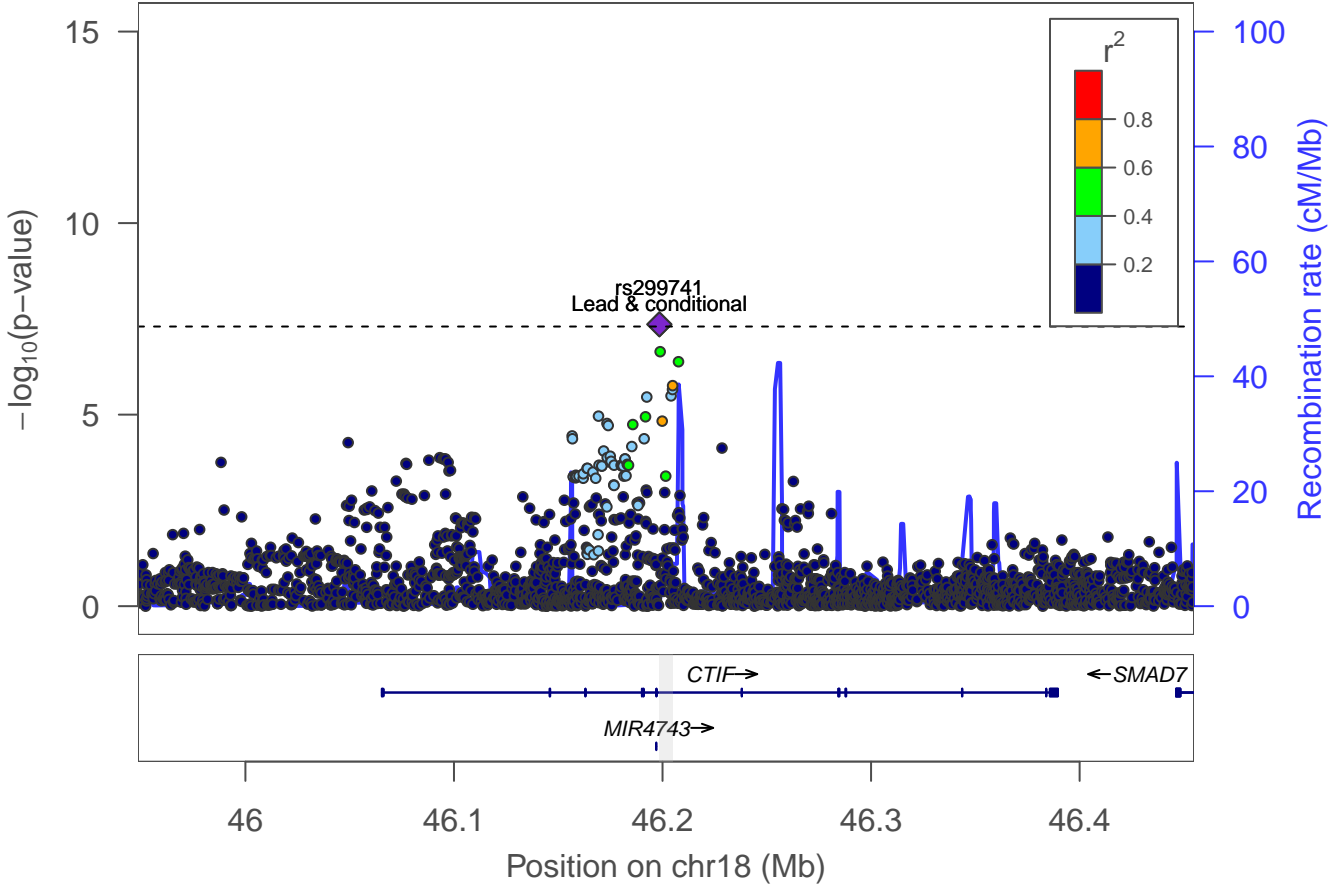

# Auto. speeding propensity: locus 33 [chr 18:52.837–52.922Mb]

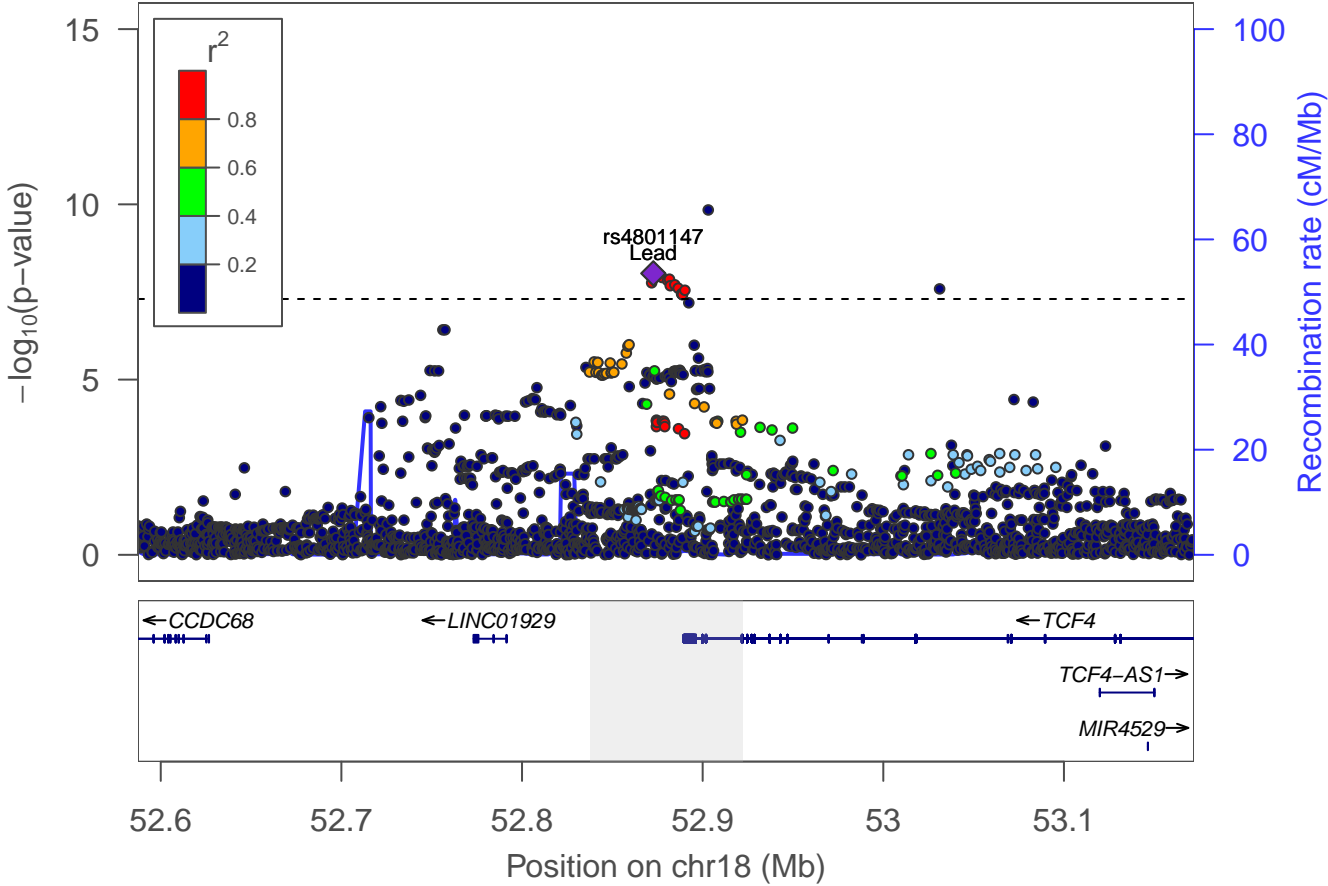

# Auto. speeding propensity: locus 34 [chr 18:53.199–53.413Mb]

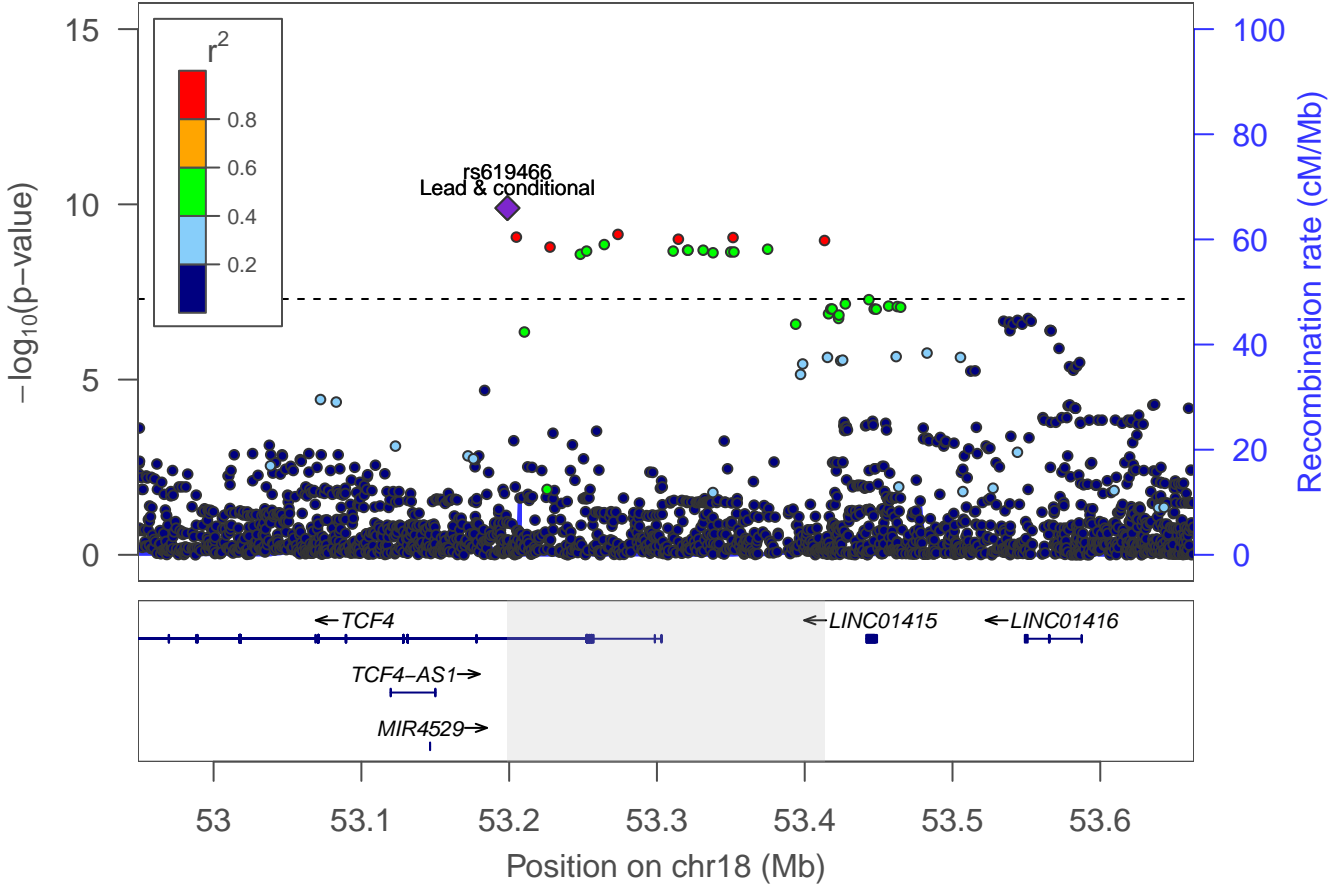

# Auto. speeding propensity: locus 35 [chr 19:3.349–3.363Mb]

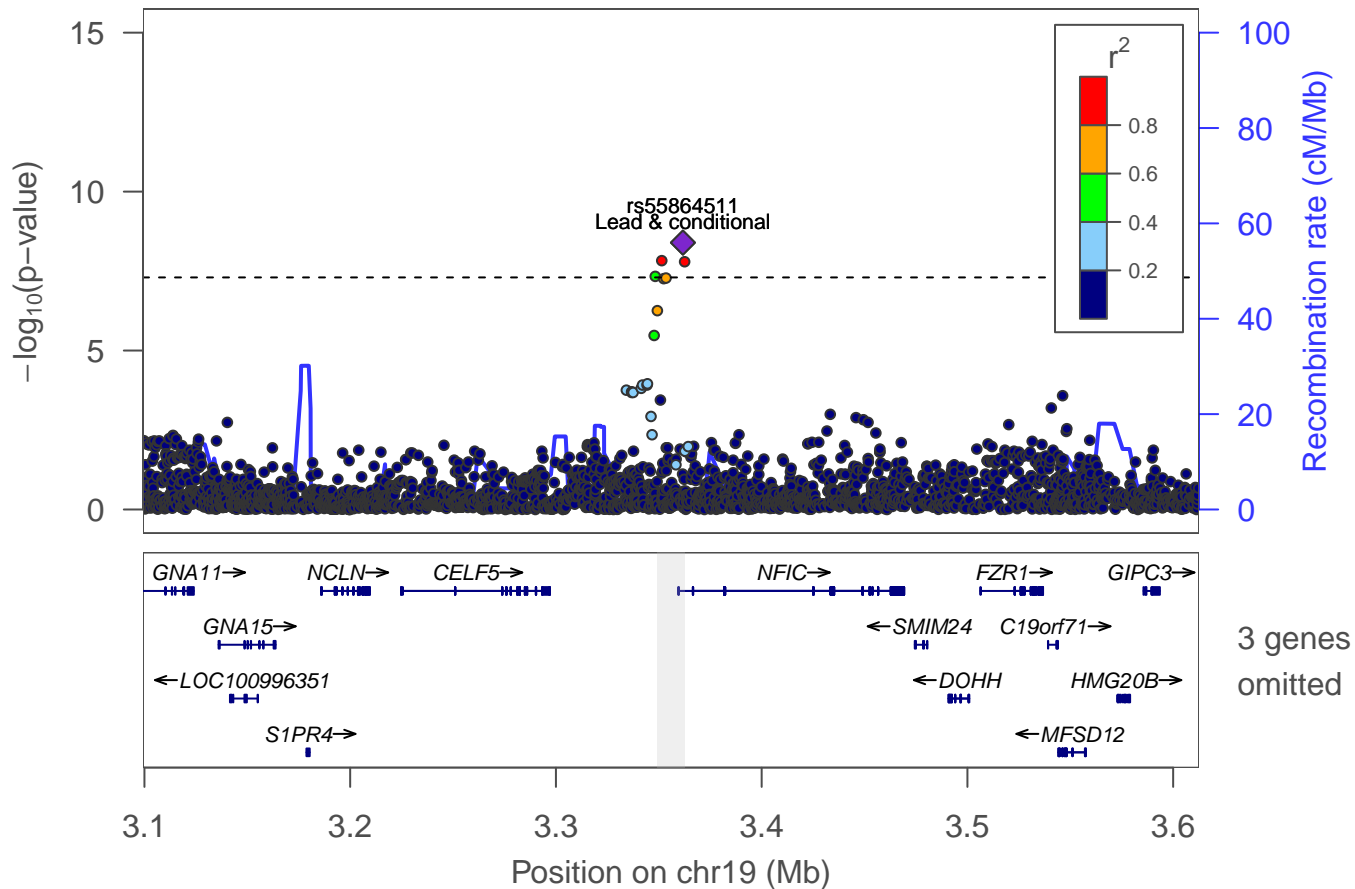

# Auto. speeding propensity: locus 36 [chr 22:38.822–38.856Mb]

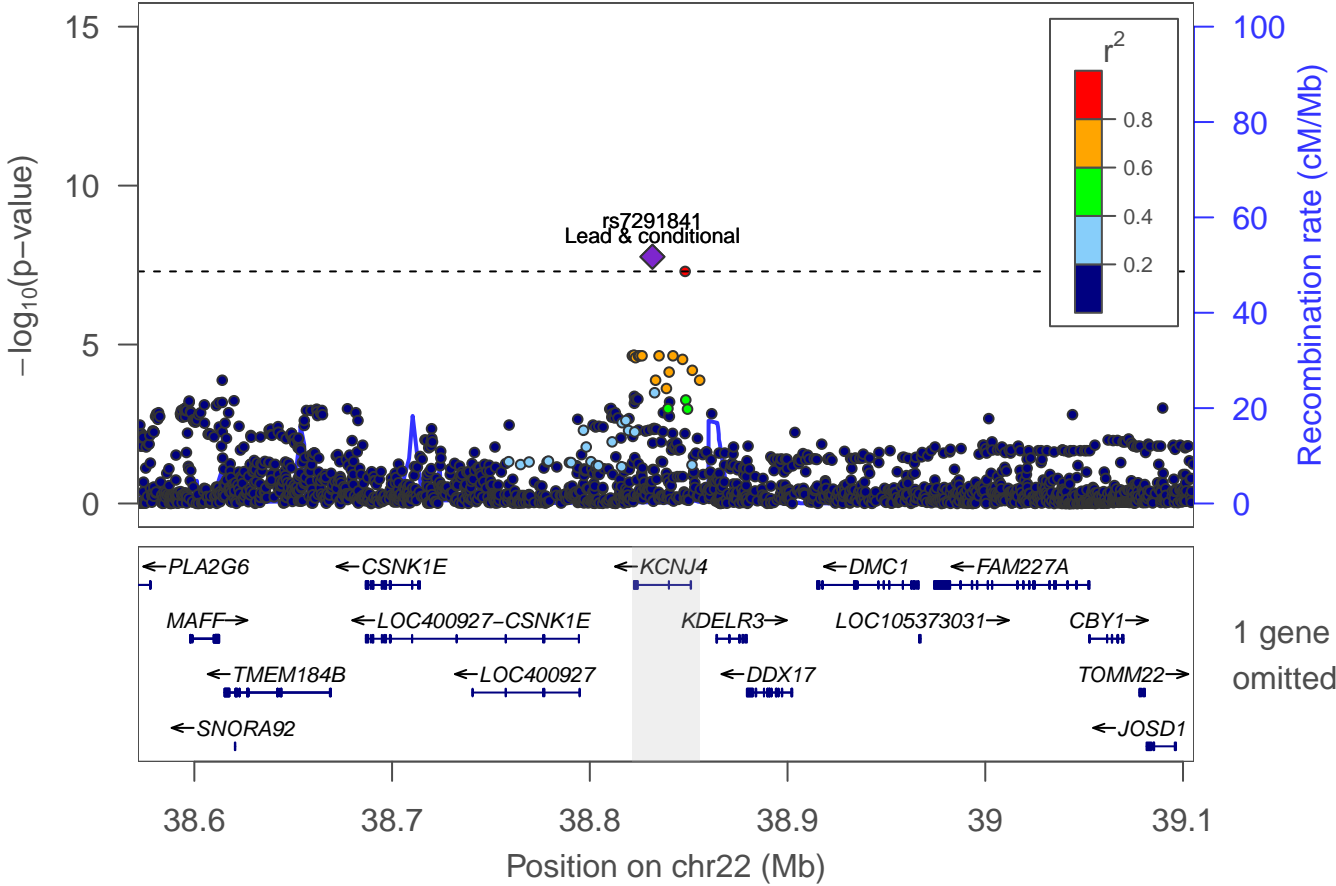

LocusZoom plots for the 62 loci identified  
in the GWAS of drinks per week

---

# Drinks per week: locus 1 [chr 1:4.569–4.574Mb]

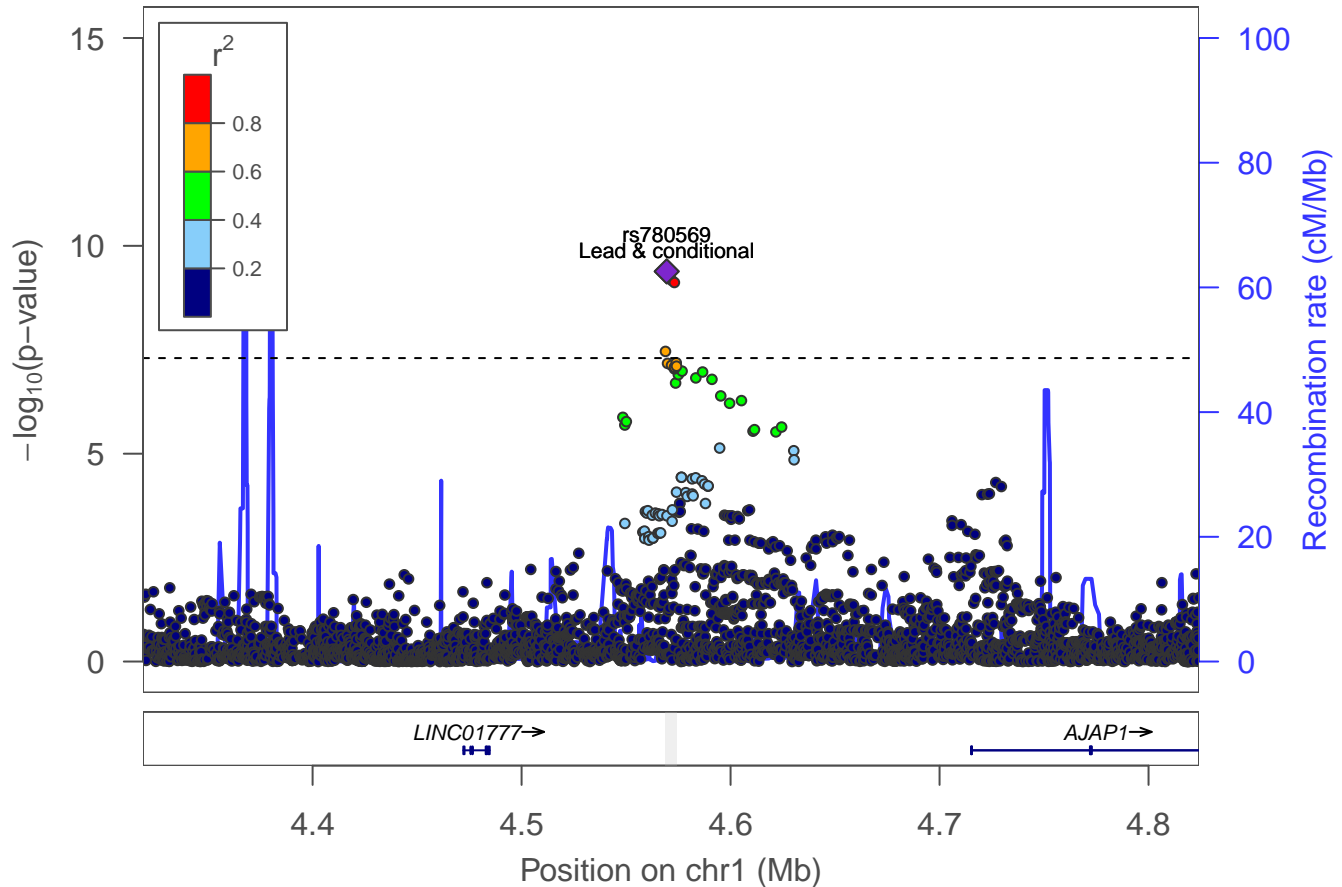

# Drinks per week: locus 2 [chr 1:72.461–72.904Mb]

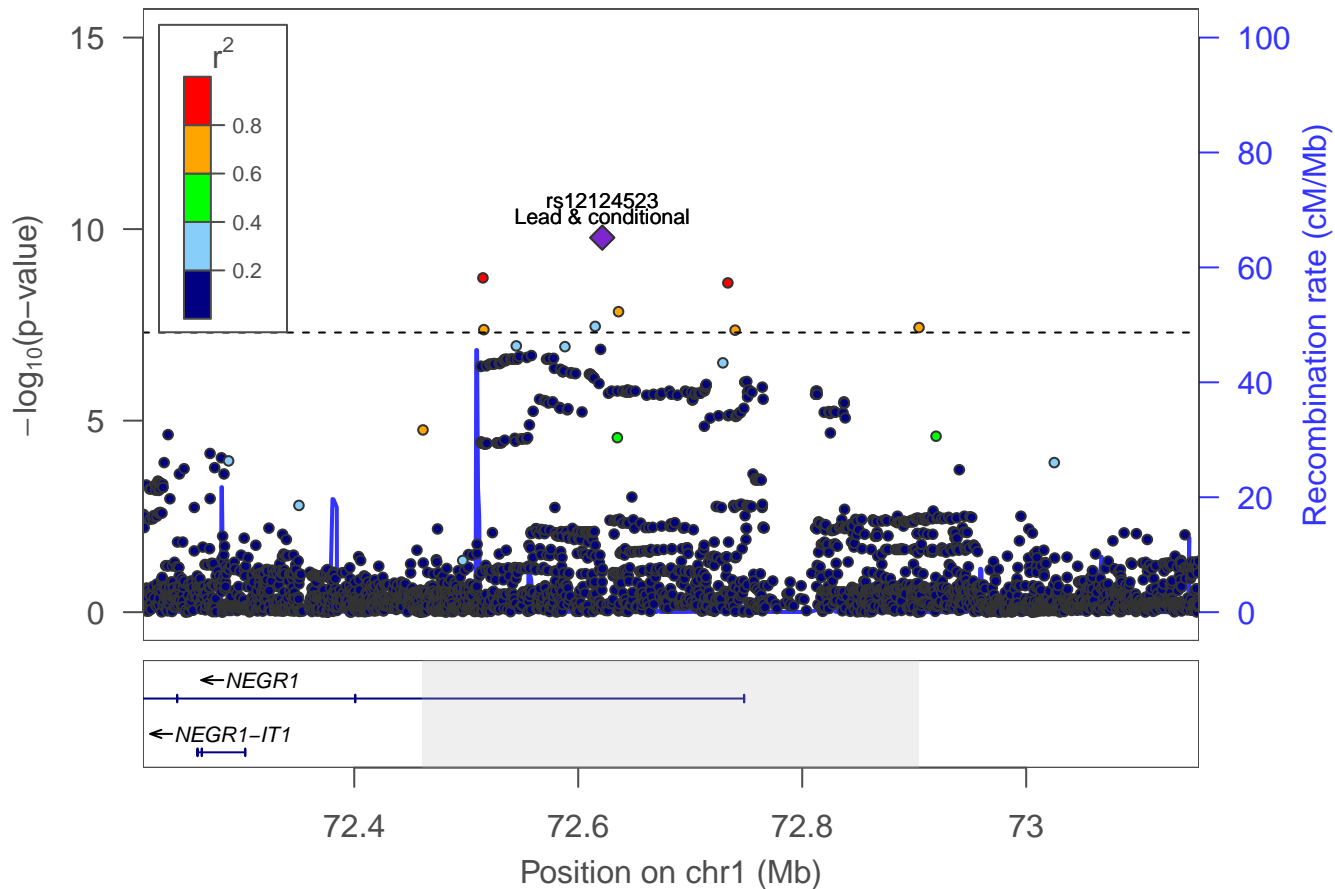



# Drinks per week: Locus 3 [chr 2: 27.598–28.277Mb]

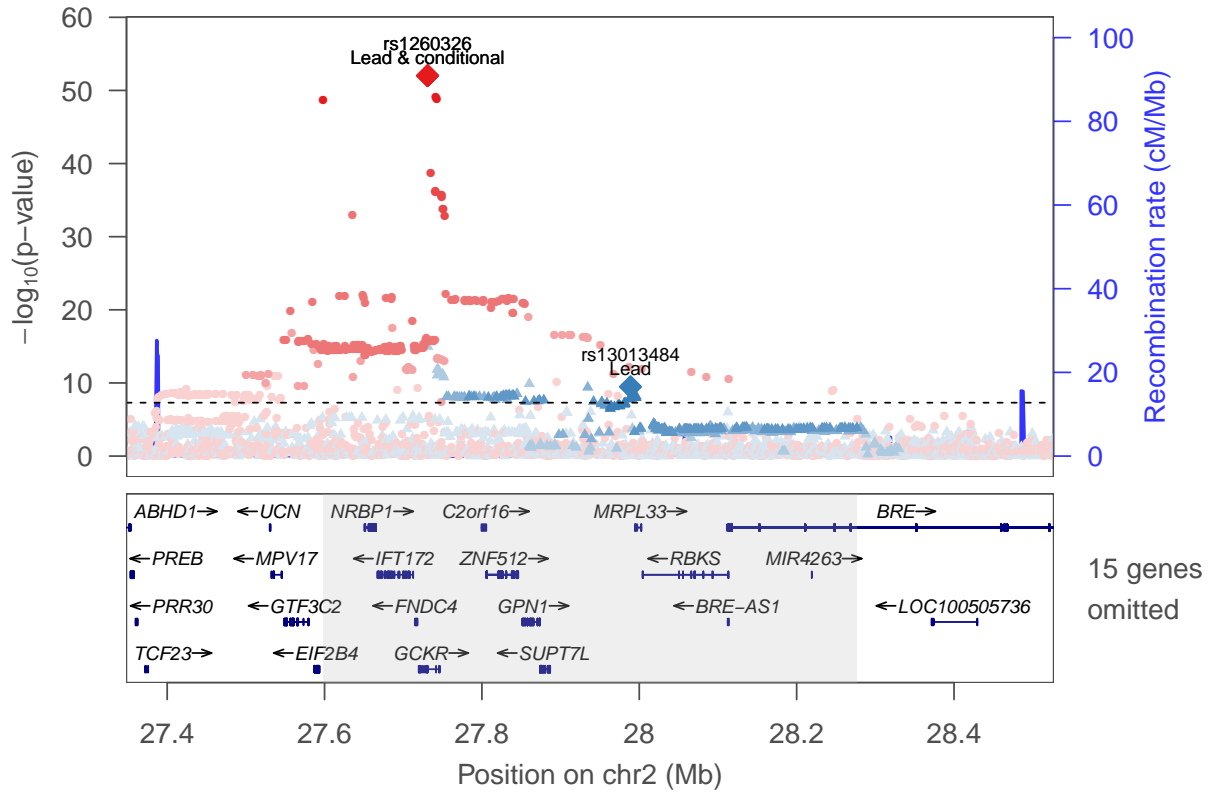

rs13013484 ▲  
rs1260326 ●

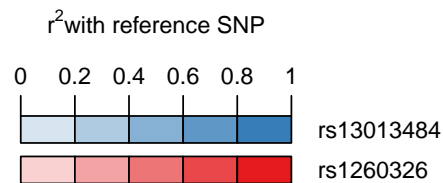

# Drinks per week: locus 4 [chr 2:44.296–44.300Mb]

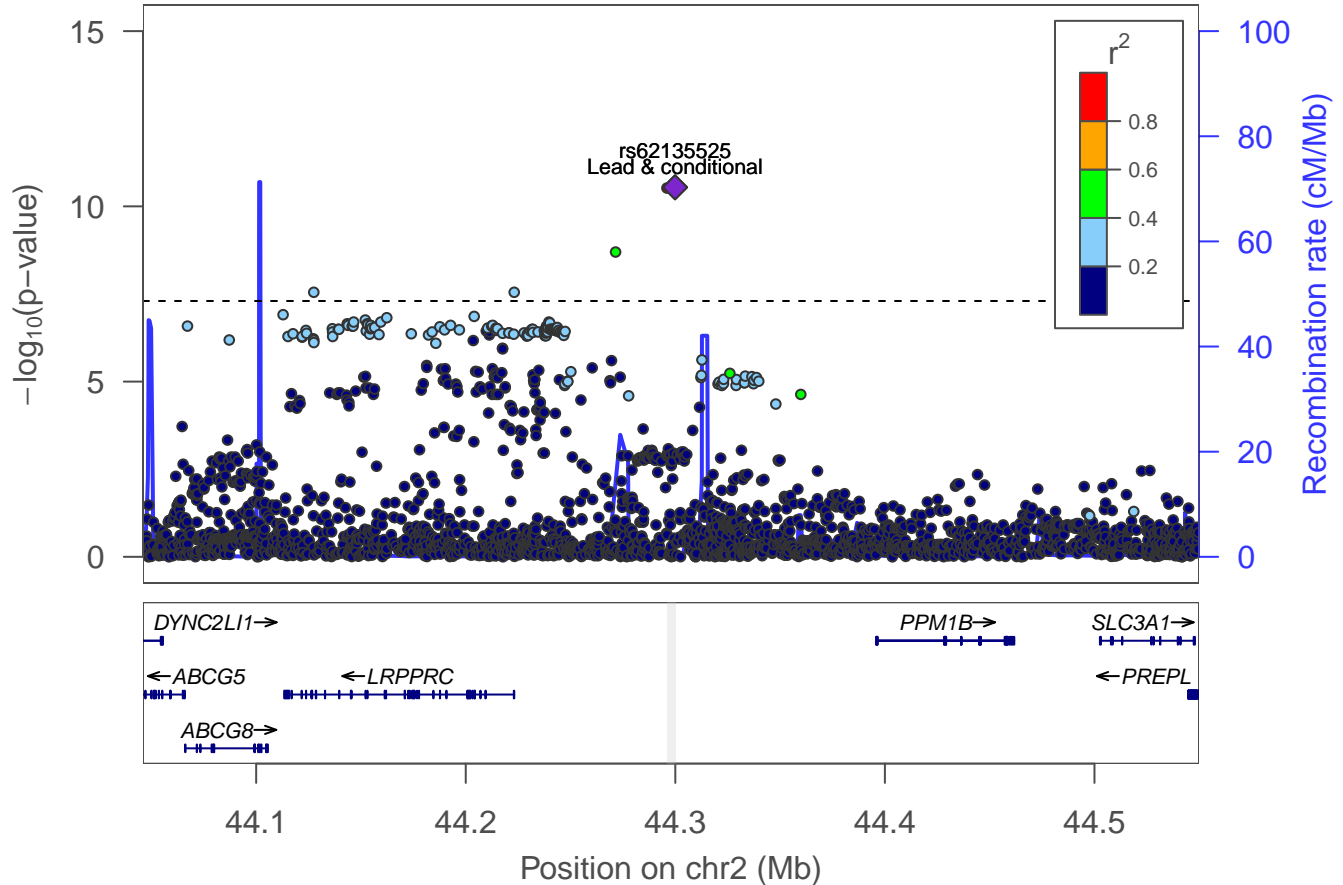

# Drinks per week: locus 5 [chr 2:45.121–45.176Mb]

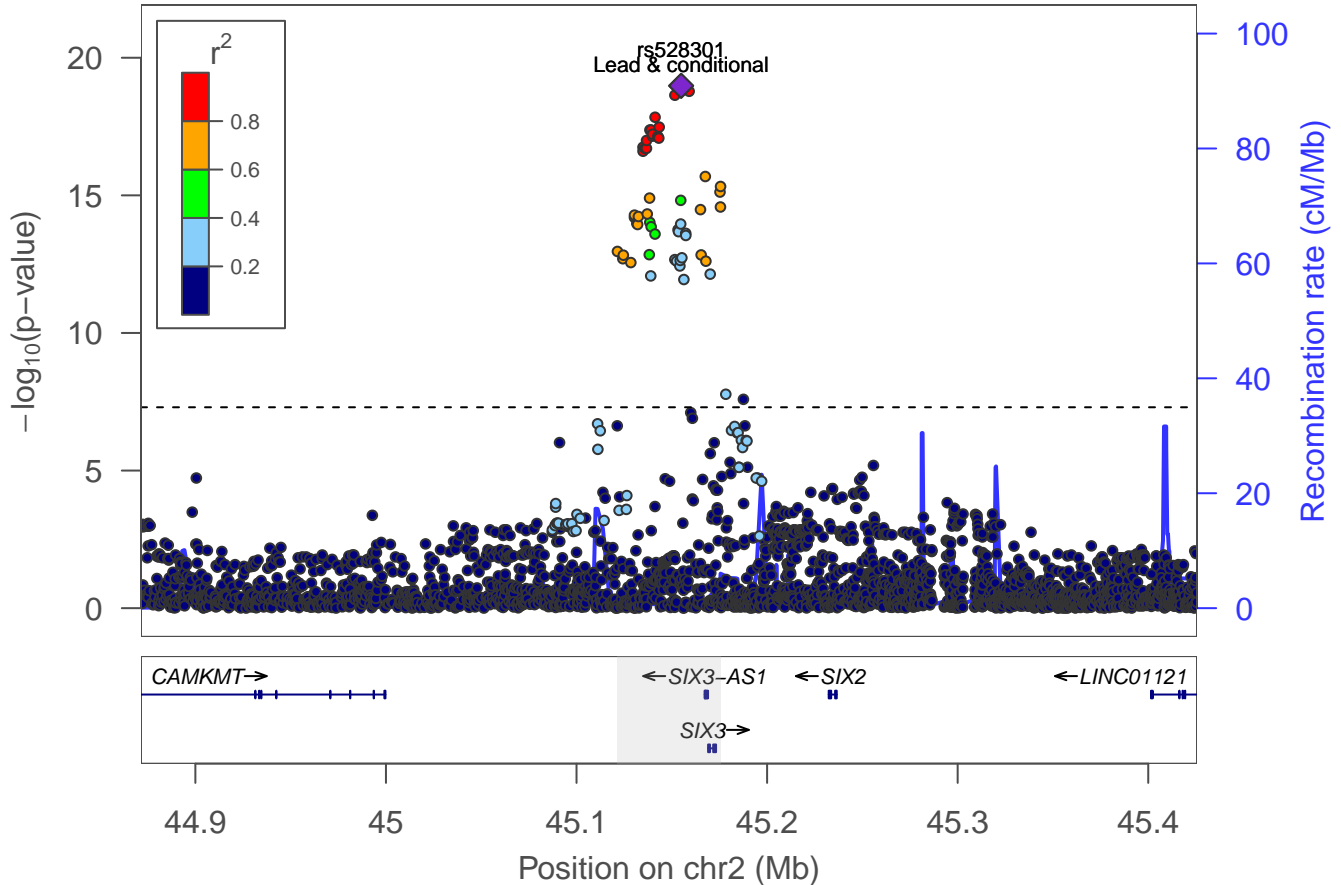

# Drinks per week: locus 6 [chr 2:57.943–58.484Mb]

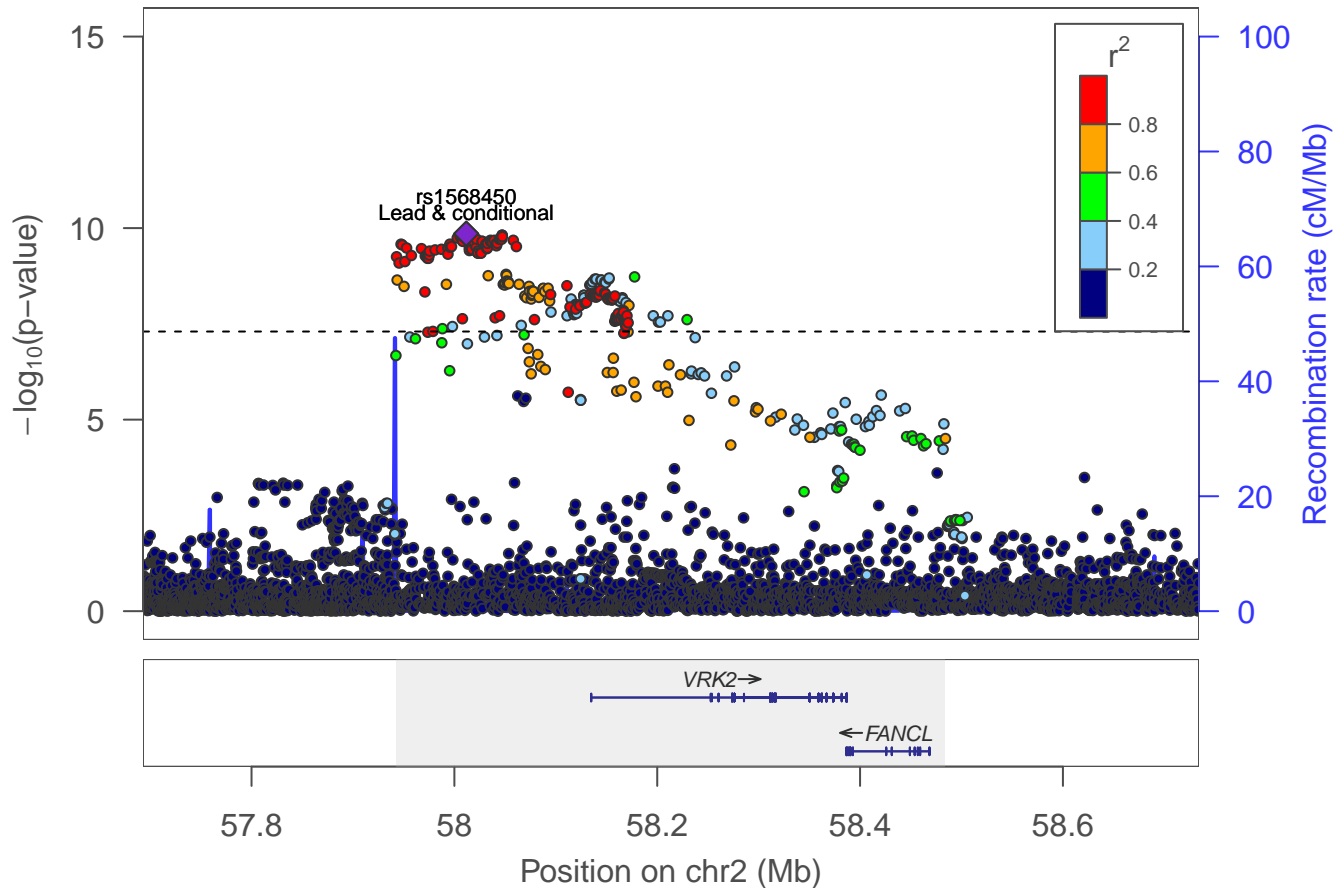

# Drinks per week: locus 7 [chr 2:97.595–98.599Mb]

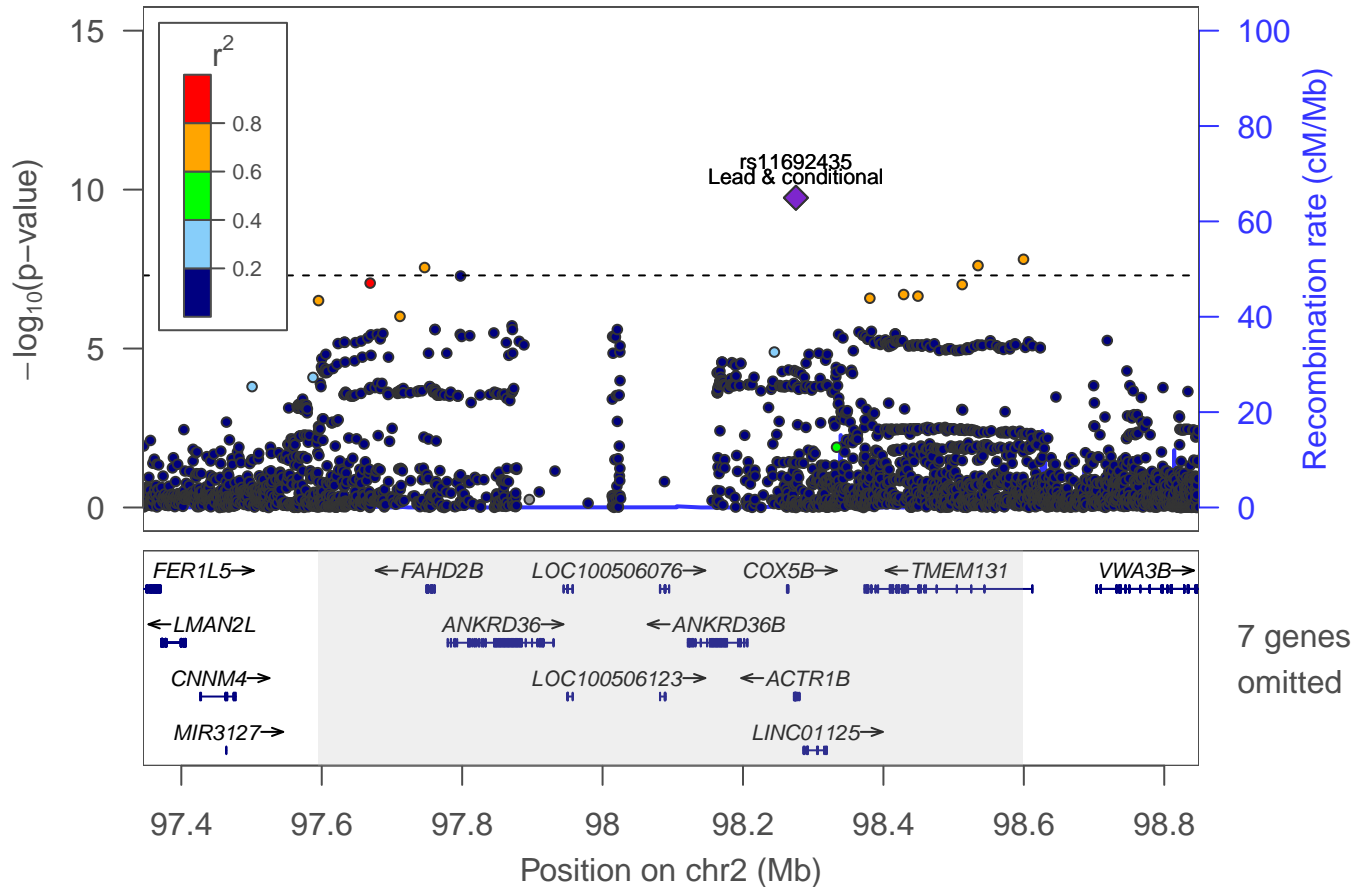

# Drinks per week: locus 8 [chr 2:144.153–144.263Mb]

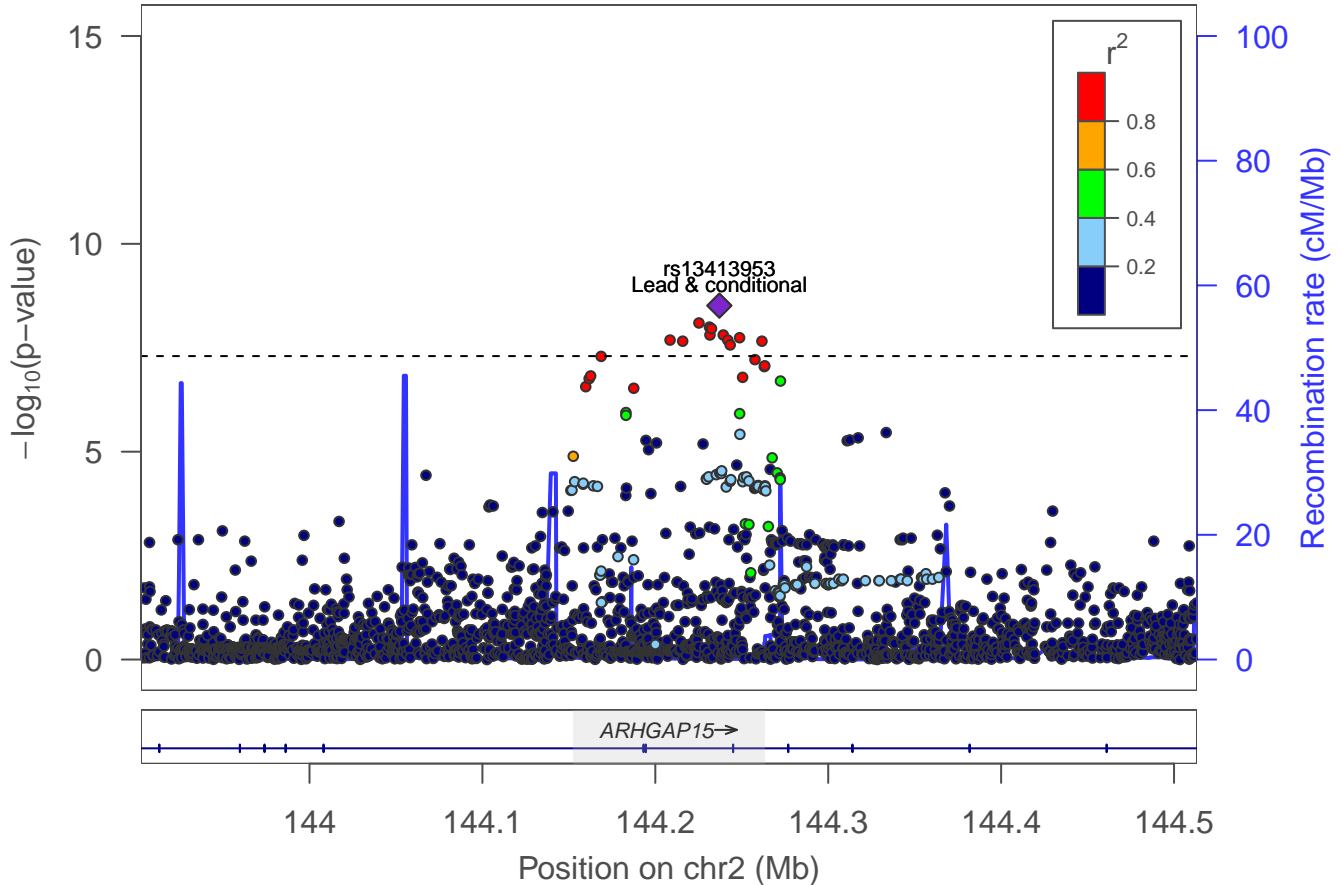

# Drinks per week: locus 9 [chr 3:38.435–38.574Mb]

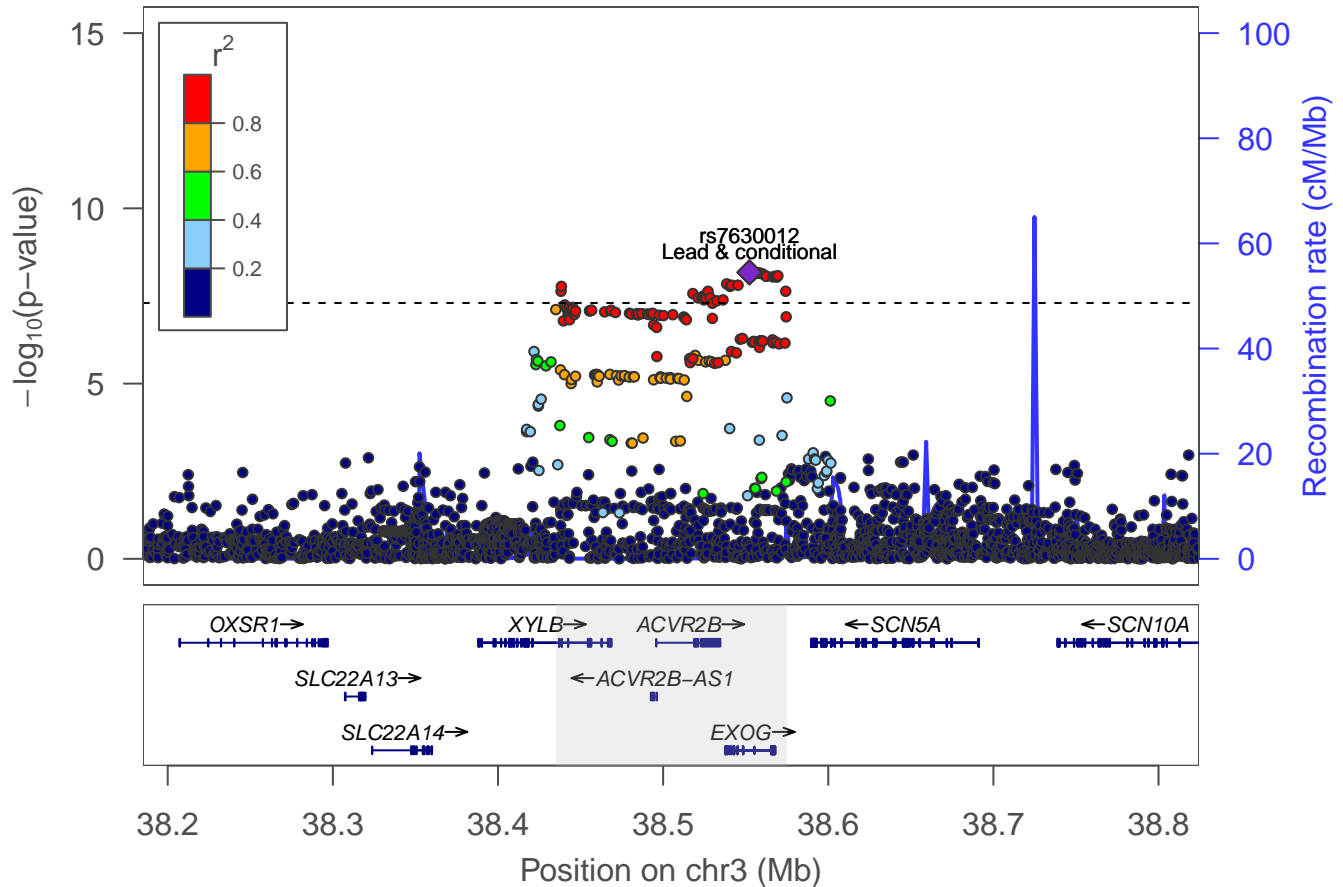

# Drinks per week: locus 10 [chr 3:84.966–85.147Mb]

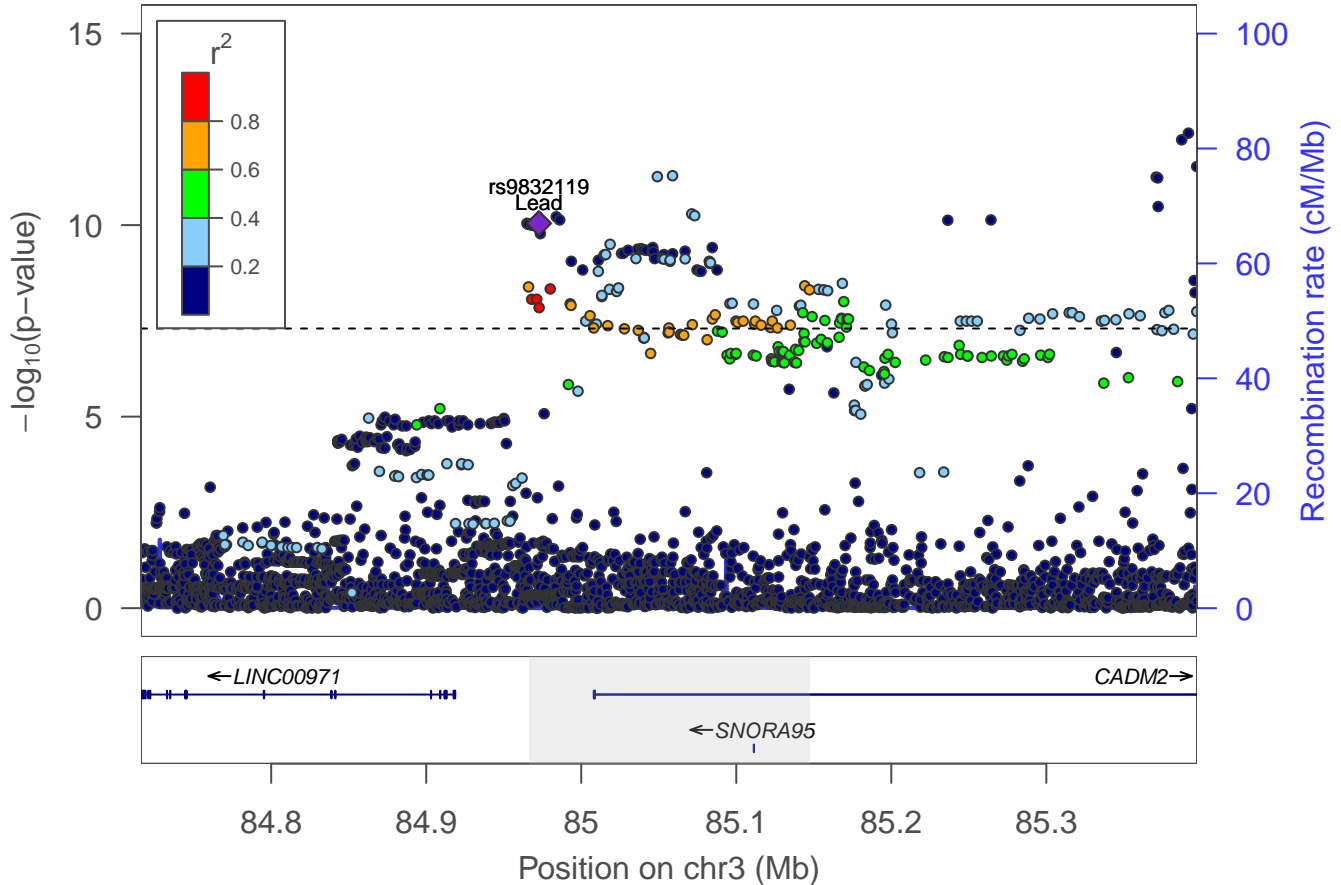



# Drinks per week: locus 11 [chr 3:85.404–85.784Mb]

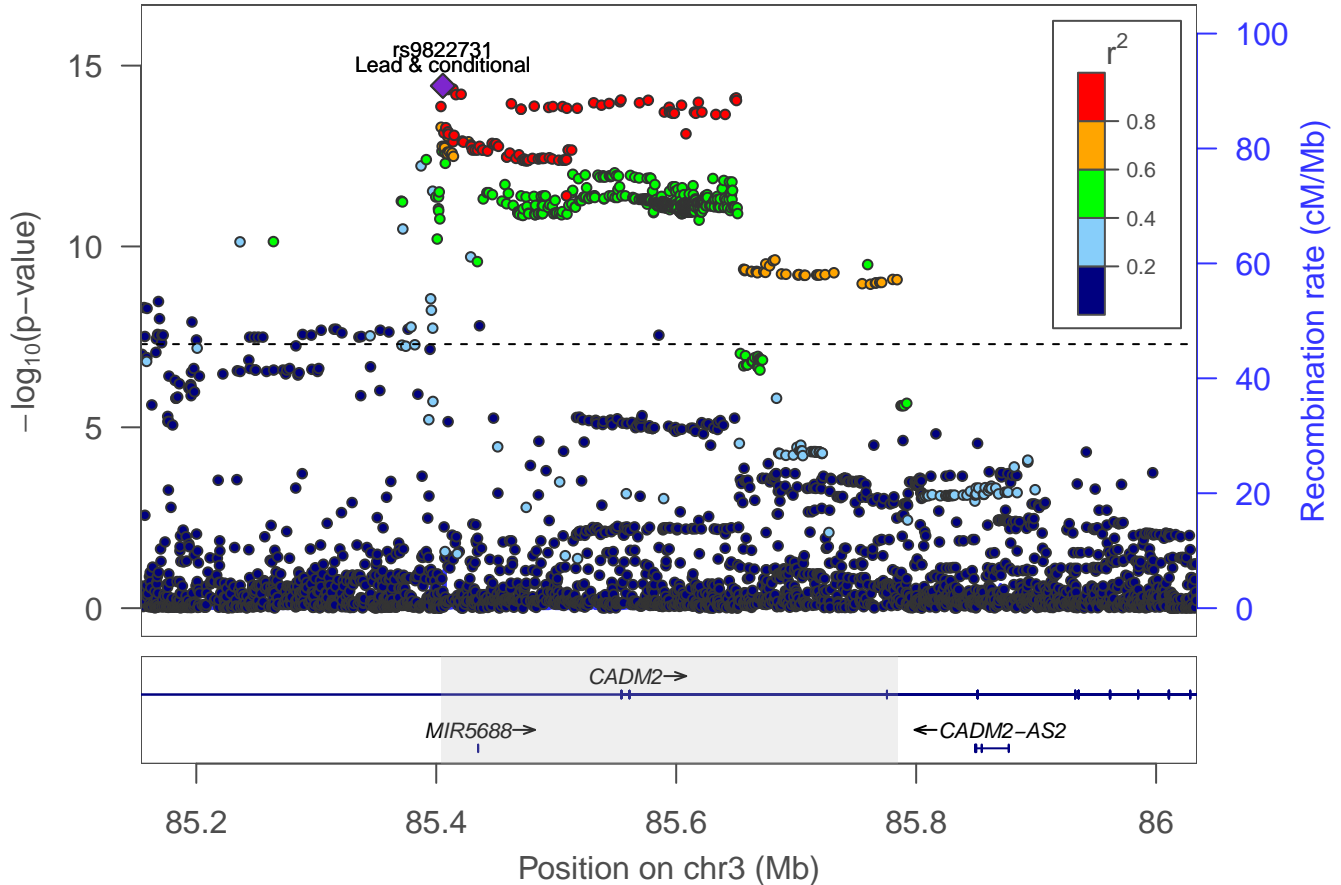

# Drinks per week: locus 12 [chr 3:100.893–101.206Mb]

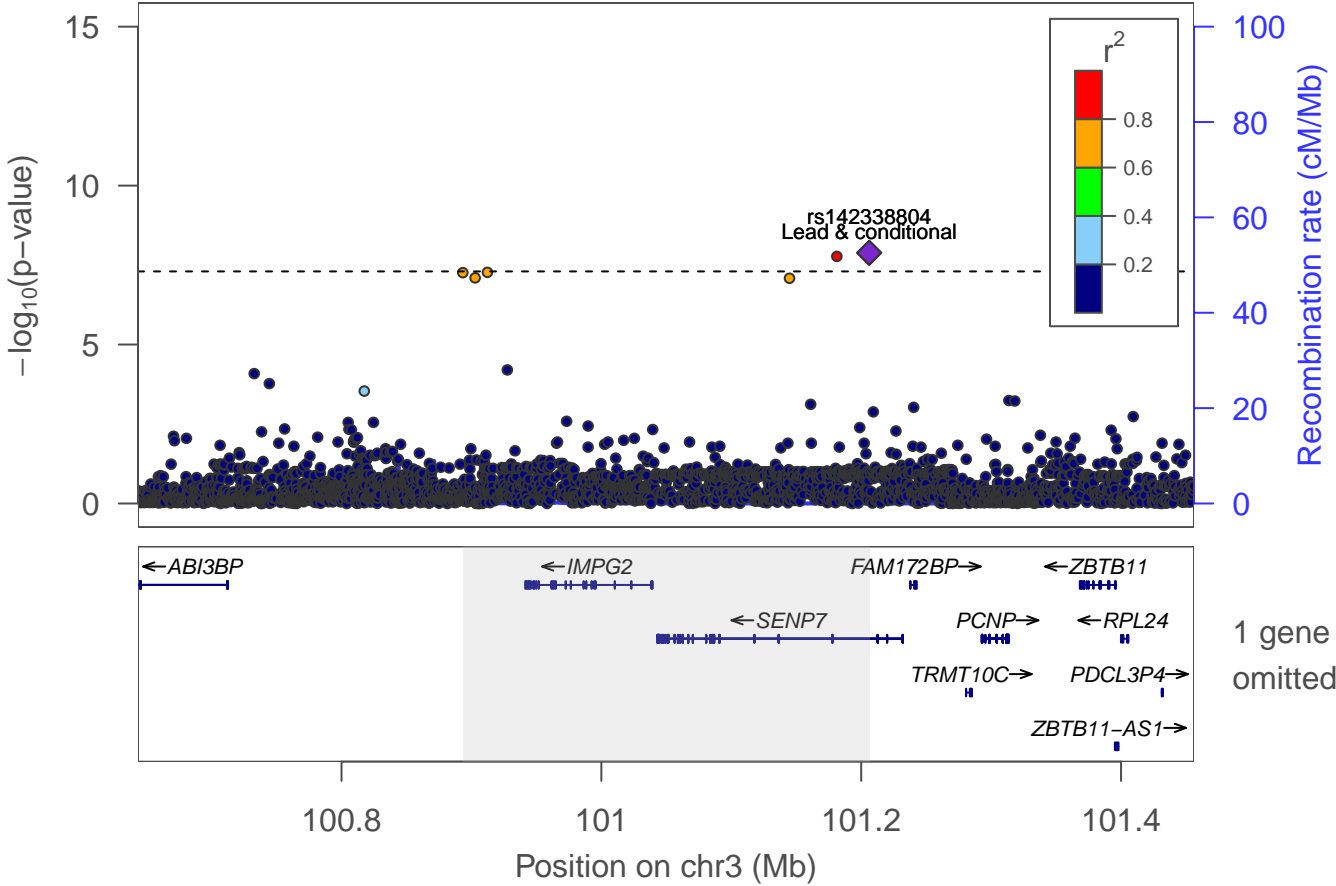

# Drinks per week: locus 13 [chr 3:161.149–161.376Mb]

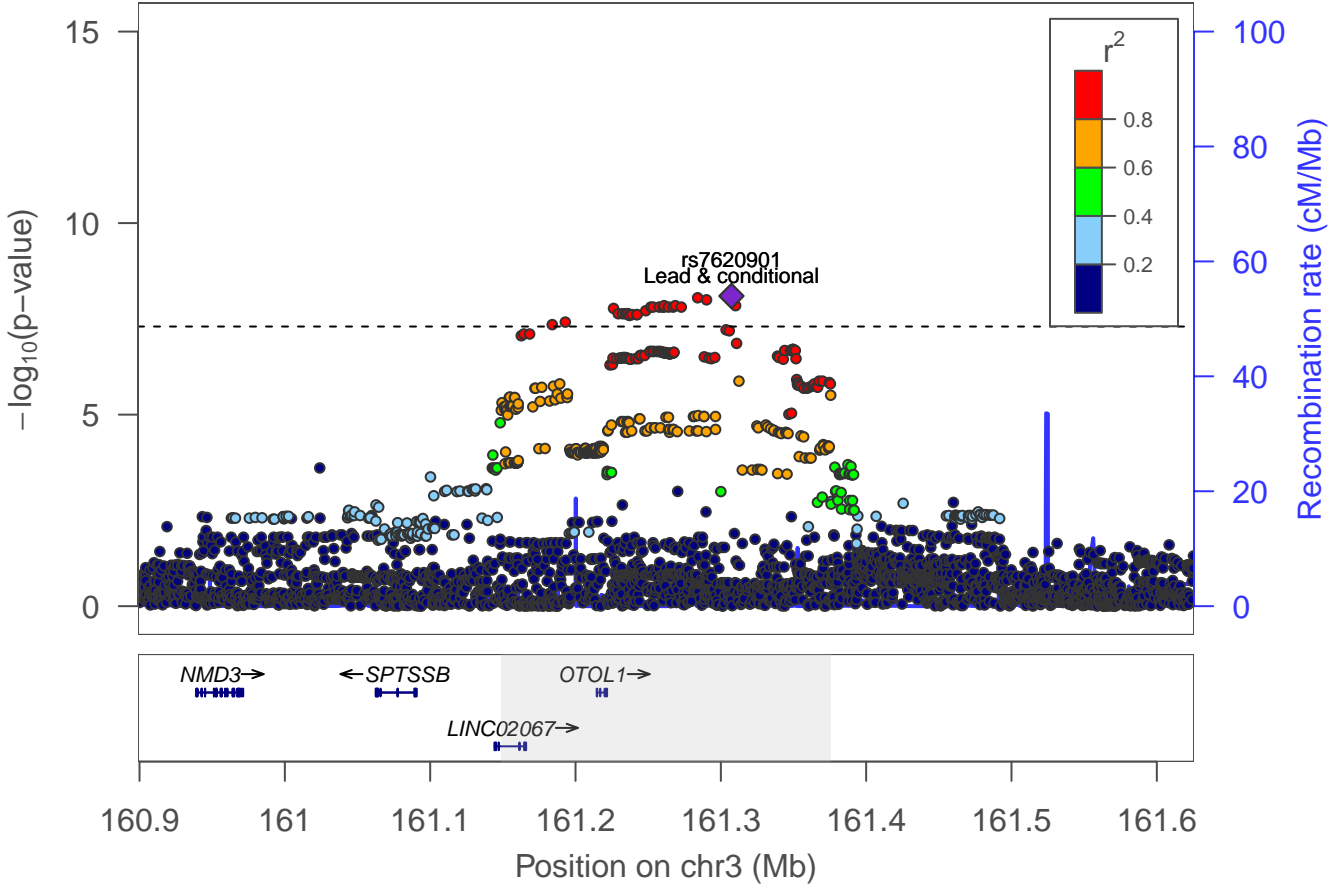

# Drinks per week: locus 14 [chr 4:3.267–3.285Mb]

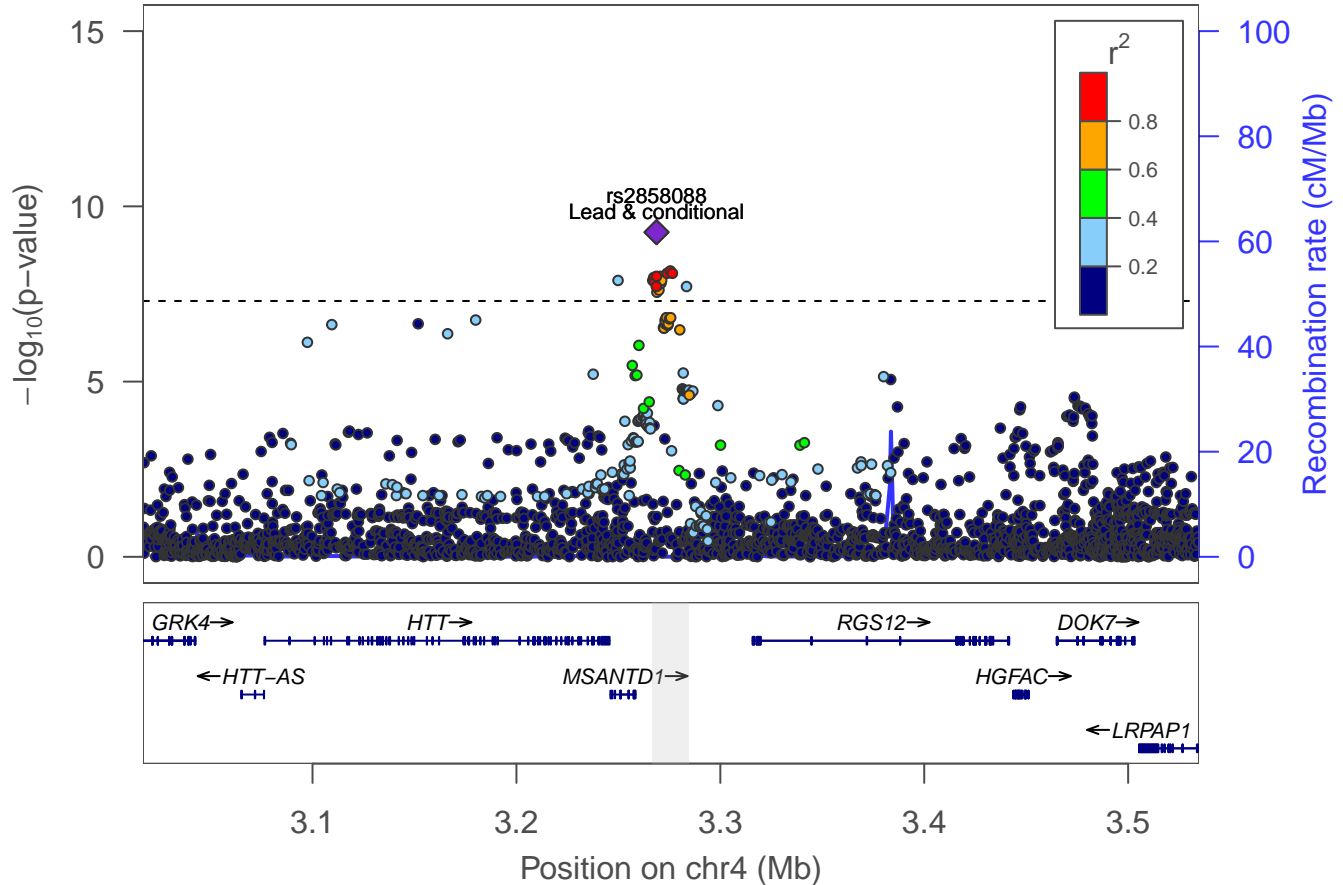

# Drinks per week: Locus 15 [chr 4: 39.414–39.440Mb]

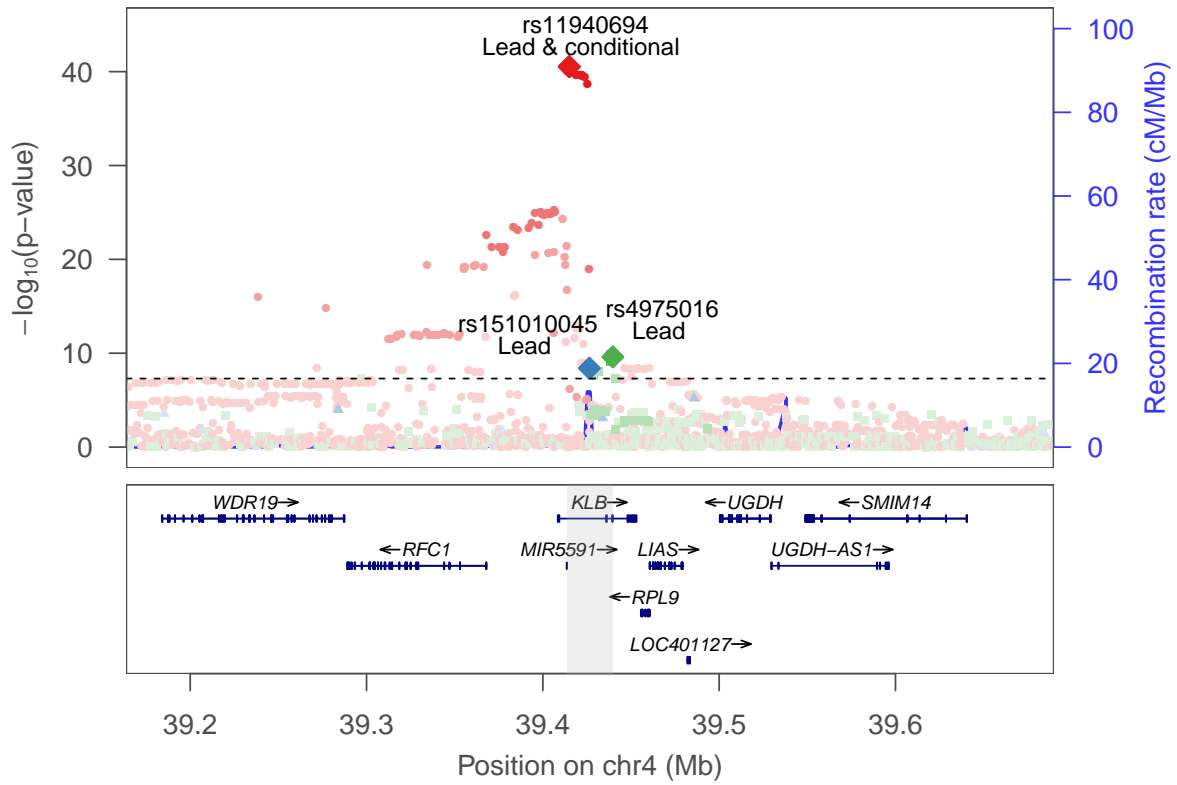

rs4975016     ■  
 rs151010045     ▲  
 rs11940694     ●

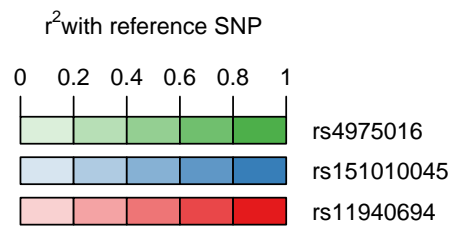

# Drinks per week: Locus 16 [chr 4: 99.465–100.438Mb]

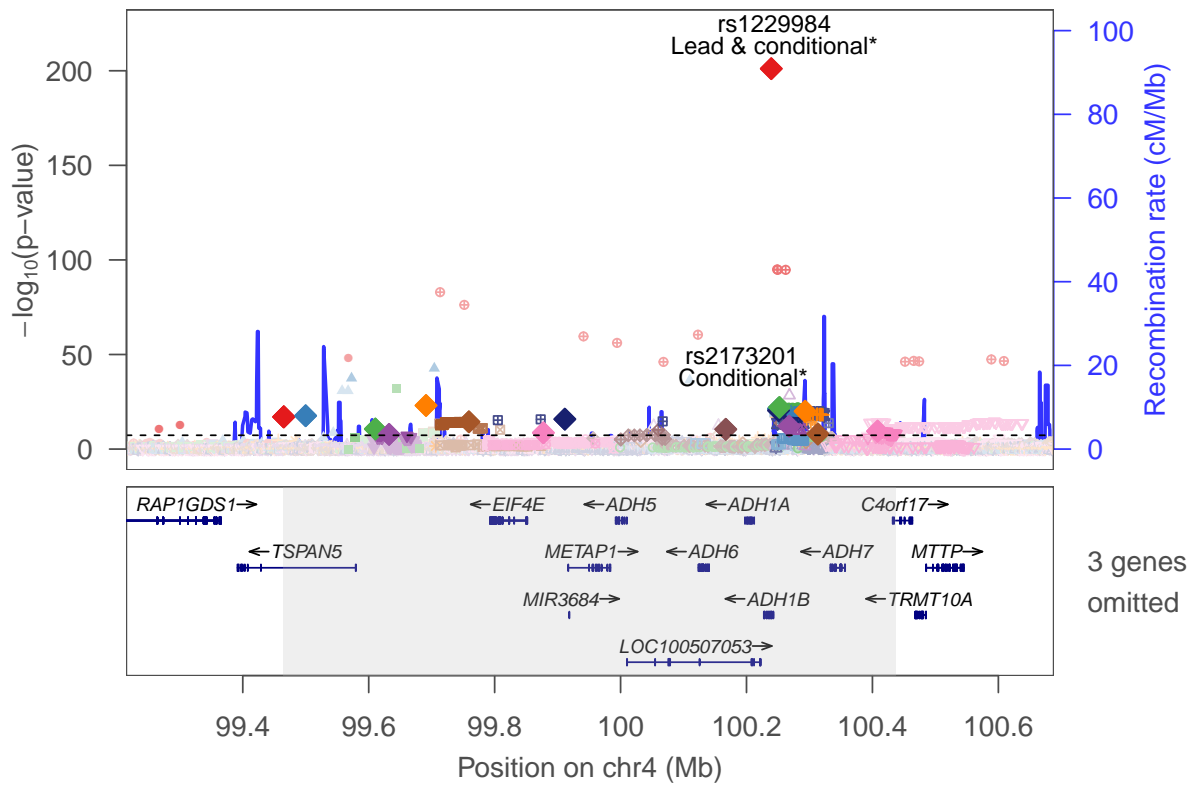

\* All other reference SNPs are Lead SNPs only.

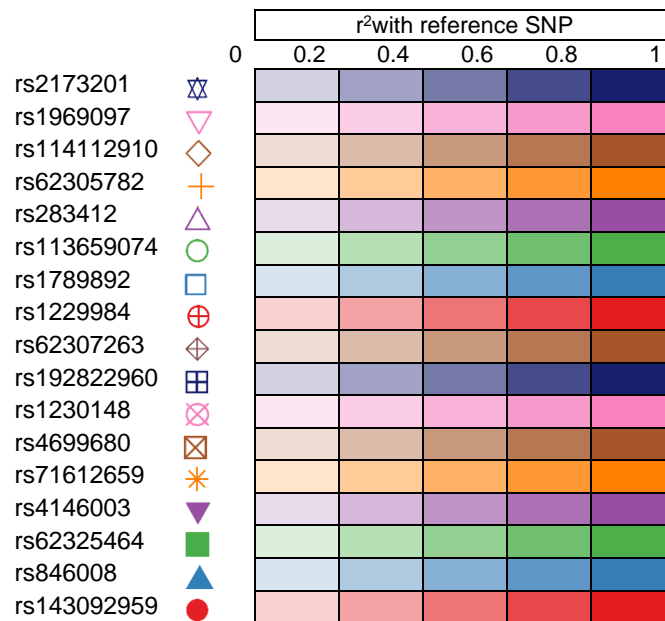

# Drinks per week: Locus 17 [chr 4: 101.085–101.183Mb]

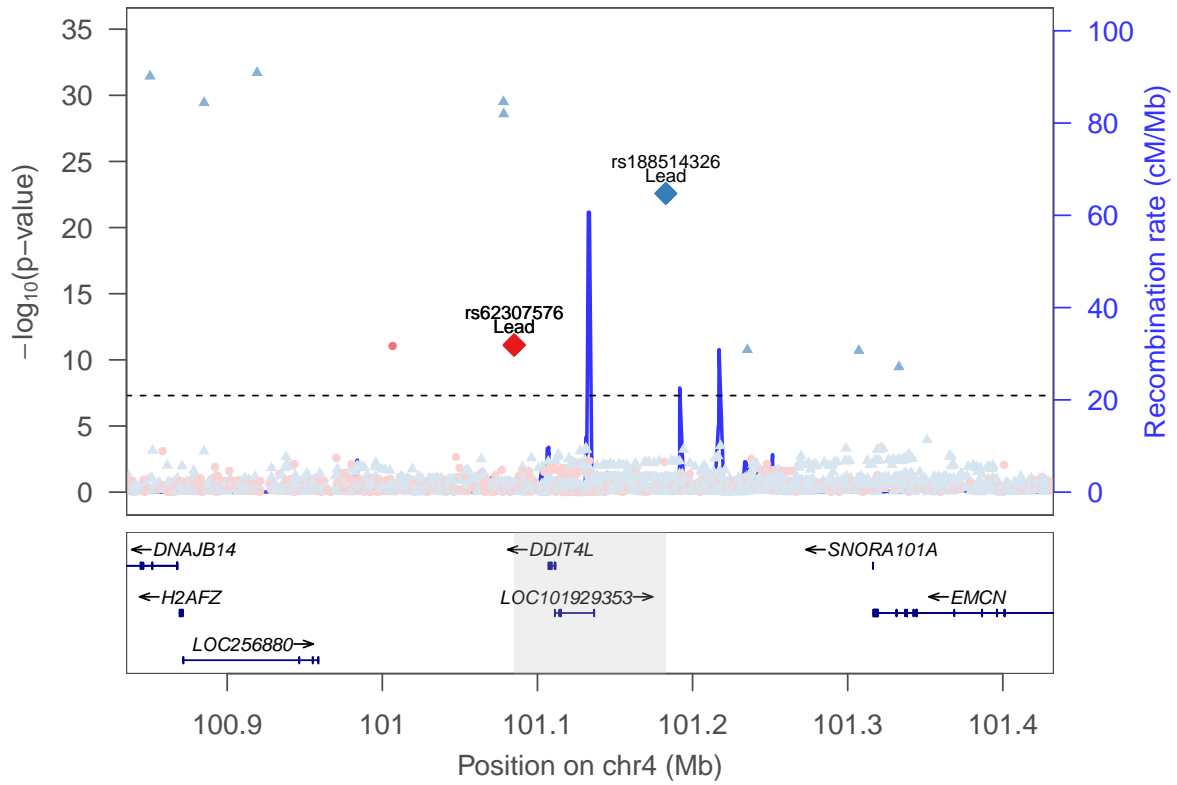

rs188514326 ▲  
 rs62307576 ●

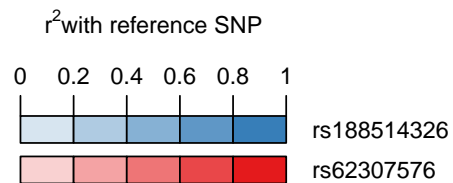

# Drinks per week: Locus 18 [chr 4: 103.002–103.198Mb]

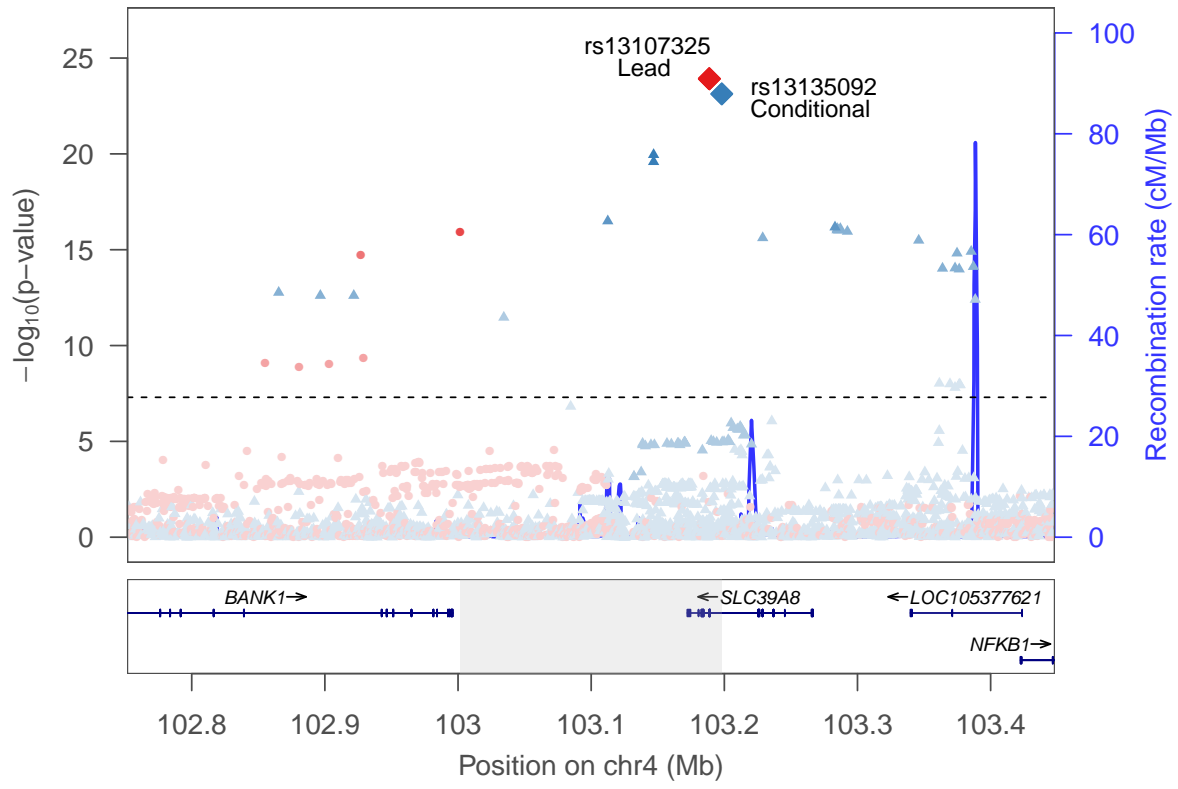

rs13135092 ▲  
rs13107325 ●

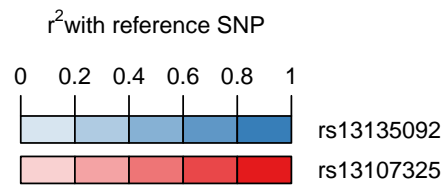



# Drinks per week: Locus 19 [chr 4: 143.487–143.623Mb]

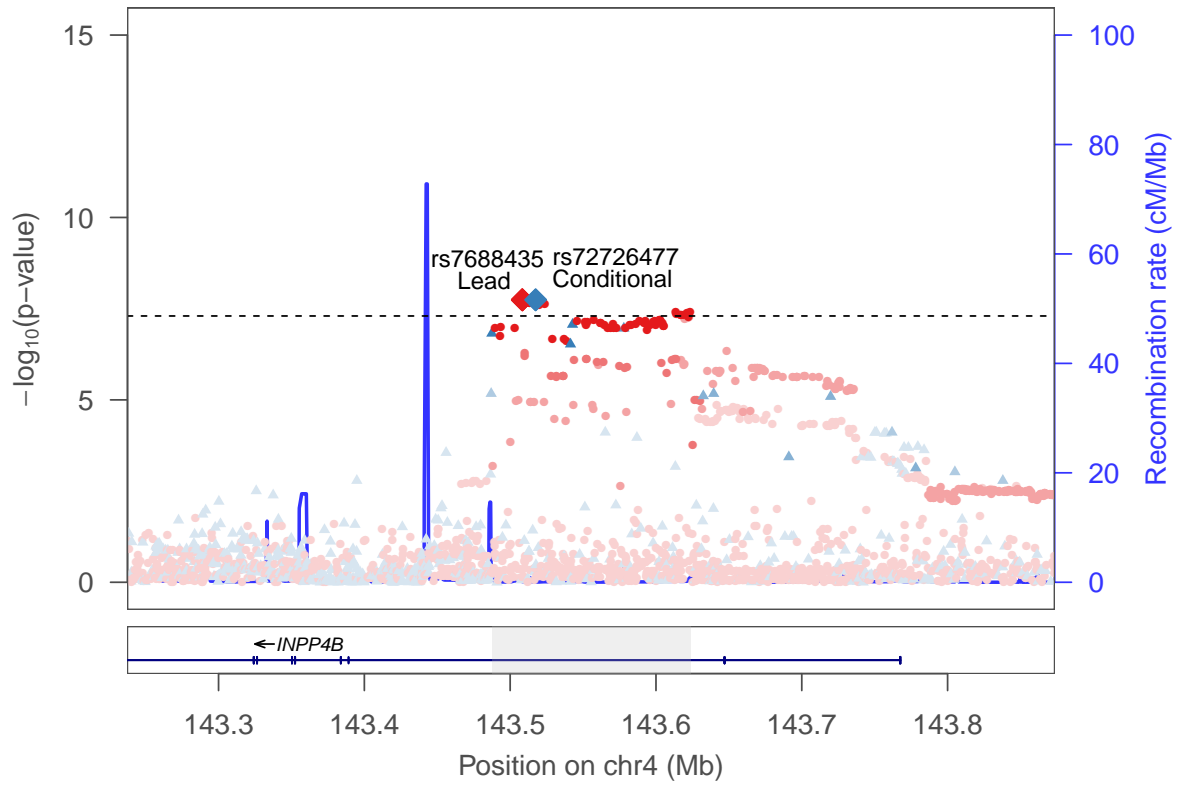

rs72726477 ▲  
rs7688435 ●

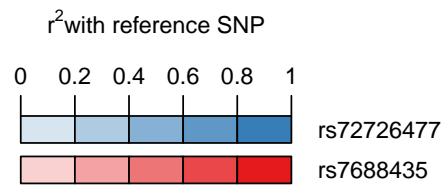

# Drinks per week: Locus 20 [chr 5: 87.467–87.933Mb]

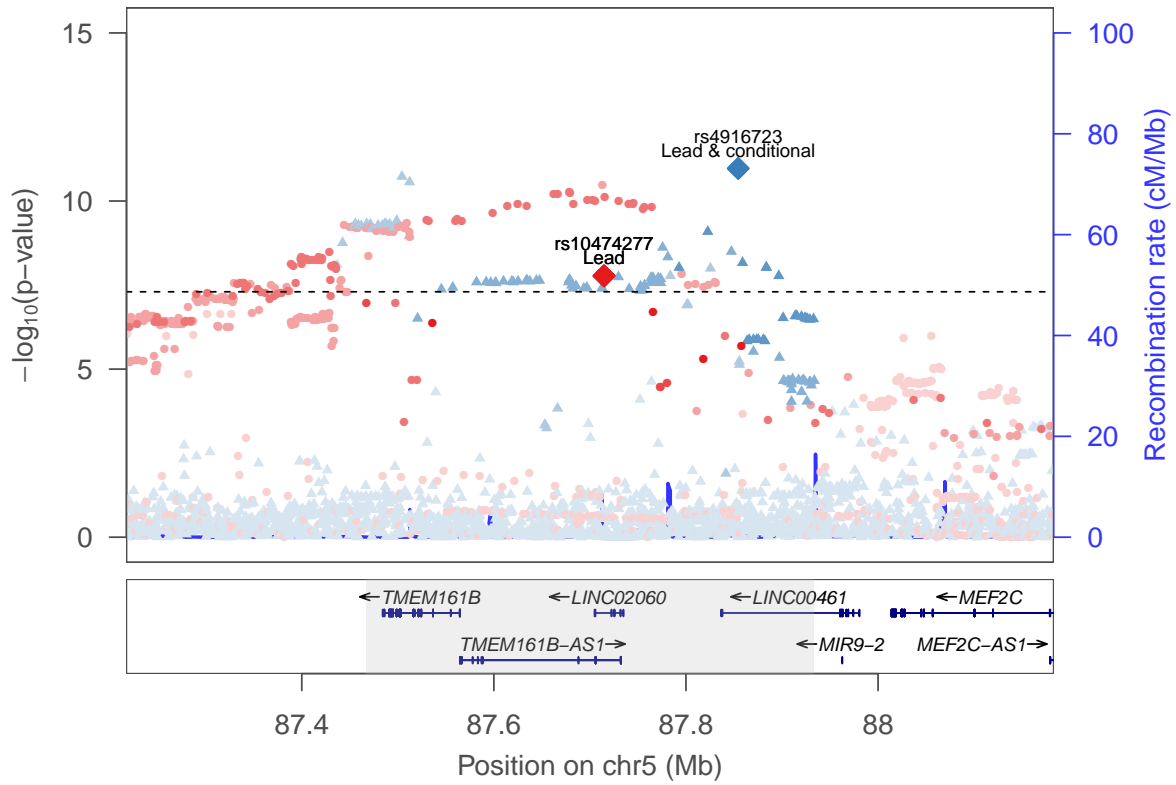

rs4916723 ▲  
rs10474277 ●

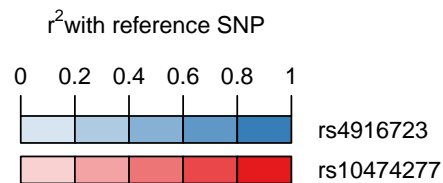

# Drinks per week: locus 21 [chr 5:143.910–144.372Mb]

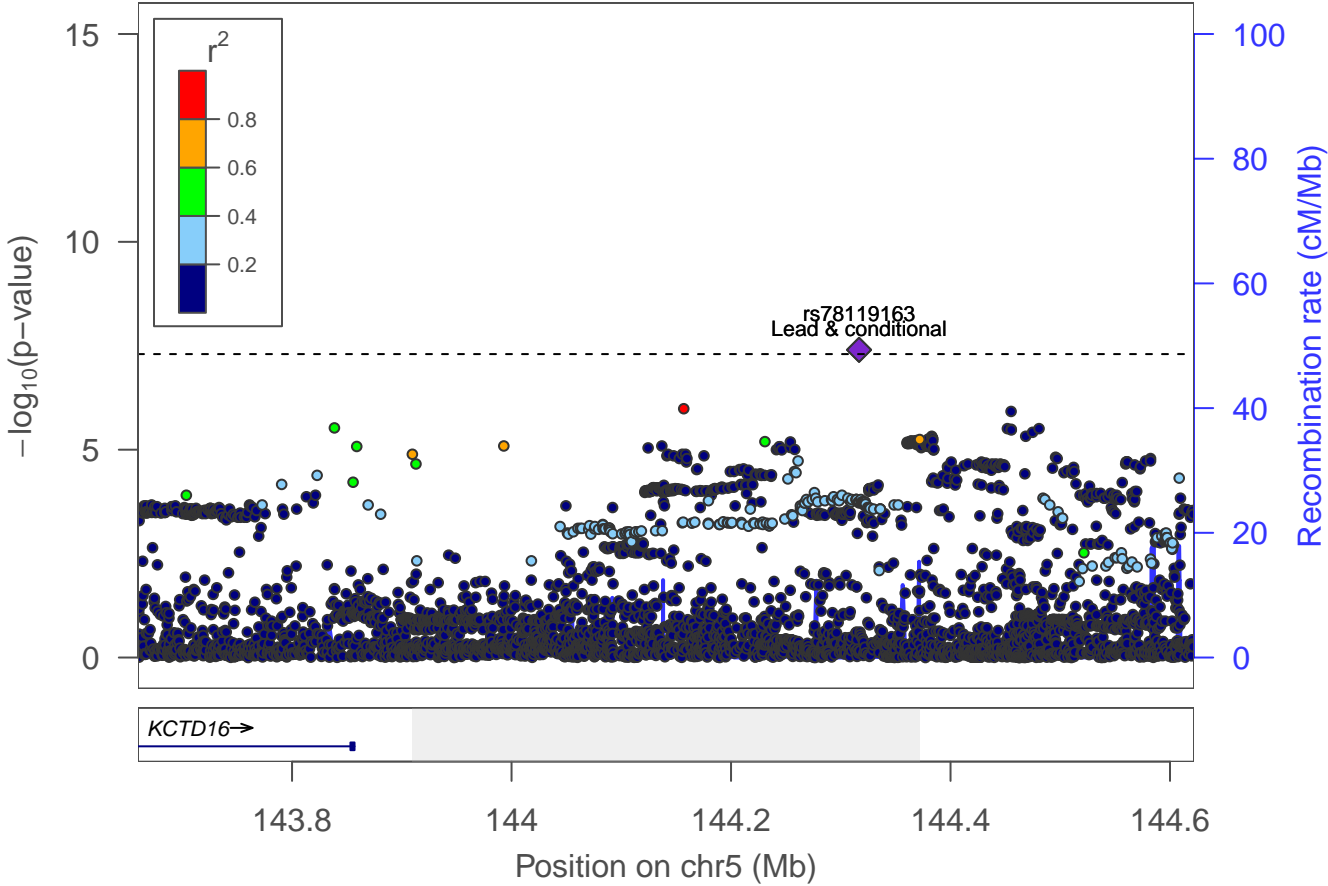

# Drinks per week: locus 22 [chr 6:12.904–12.904Mb]

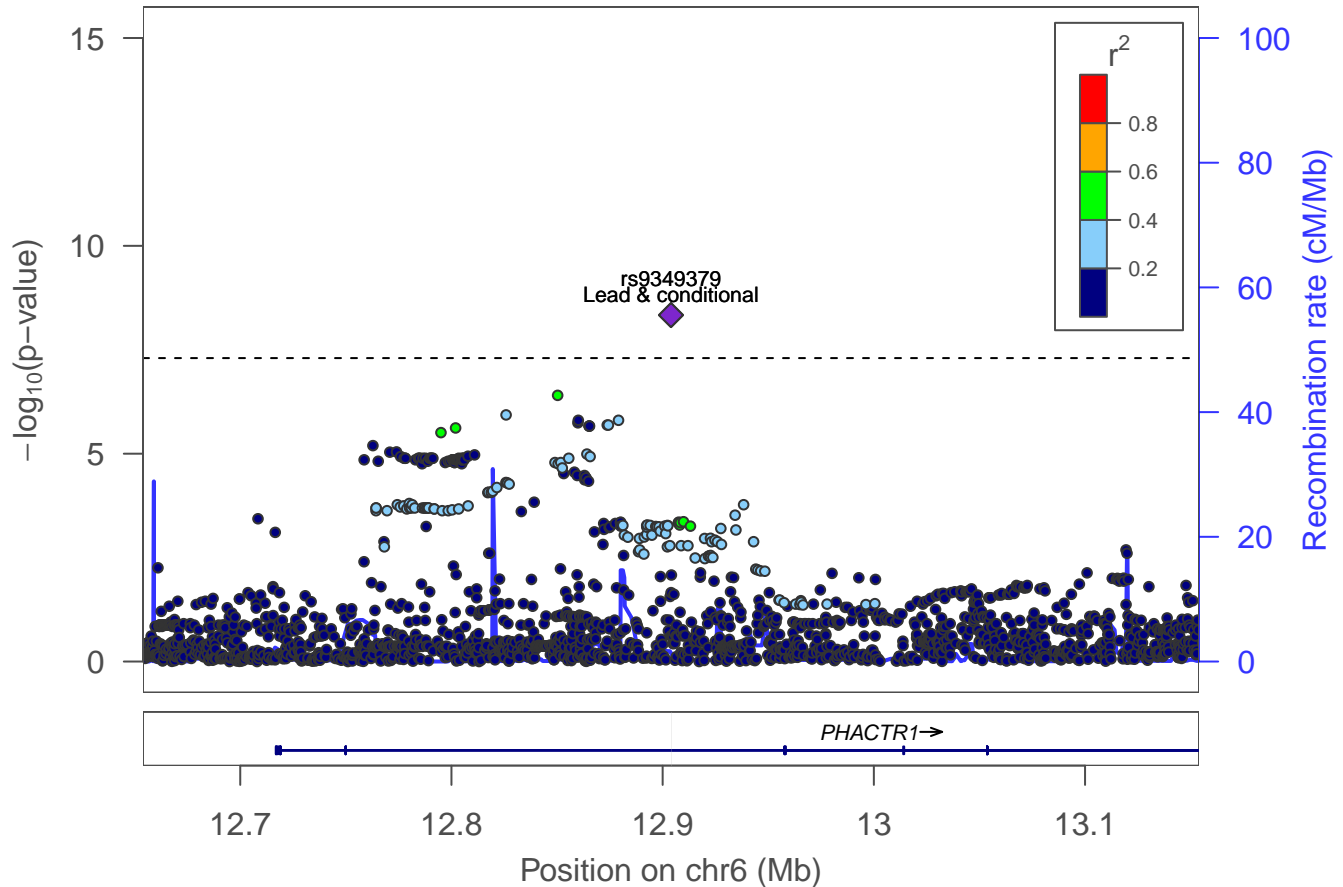

# Drinks per week: locus 23 [chr 7:1.874–2.111Mb]

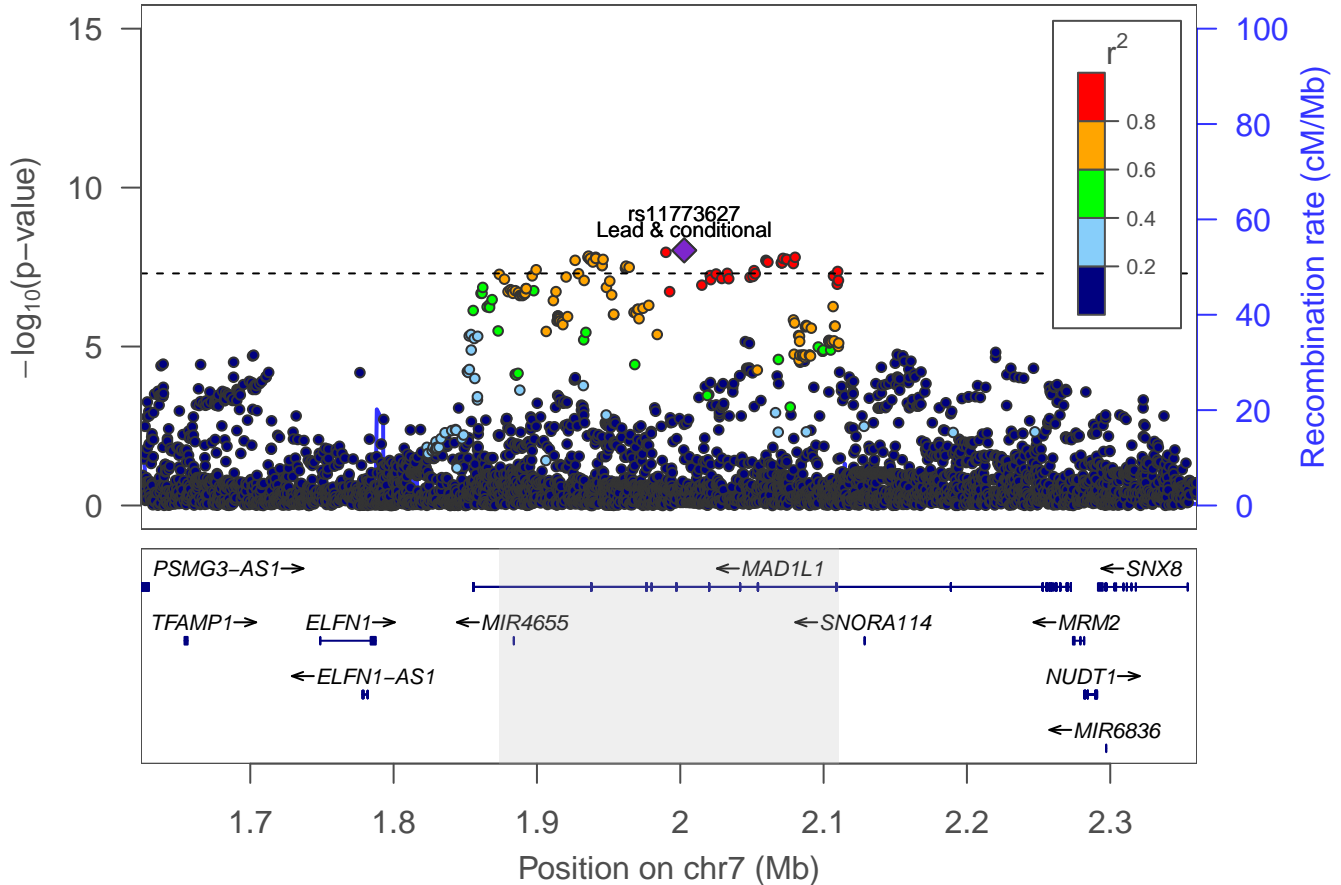

# Drinks per week: locus 24 [chr 7:20.818–20.826Mb]

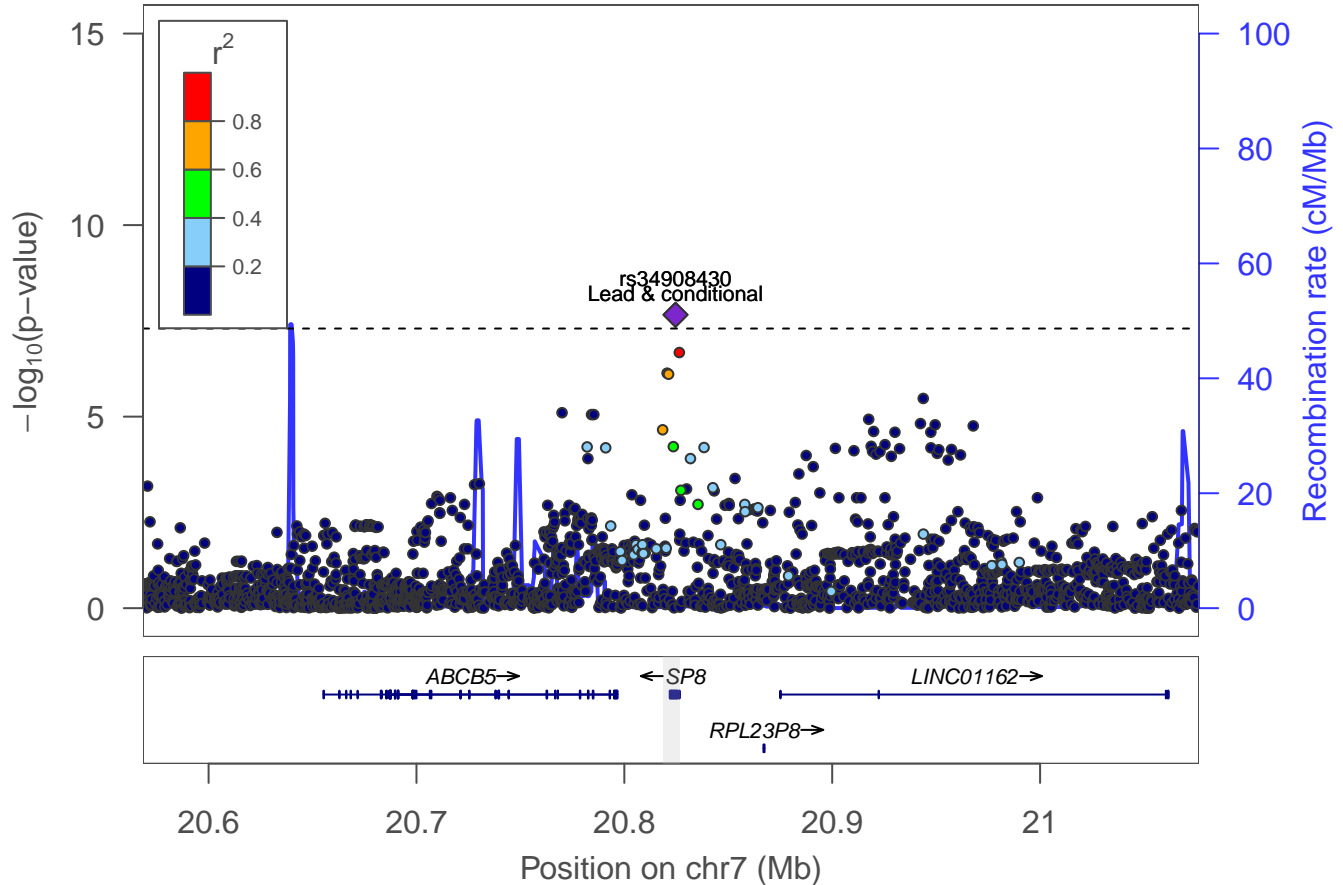

# Drinks per week: locus 25 [chr 7:27.556–27.878Mb]

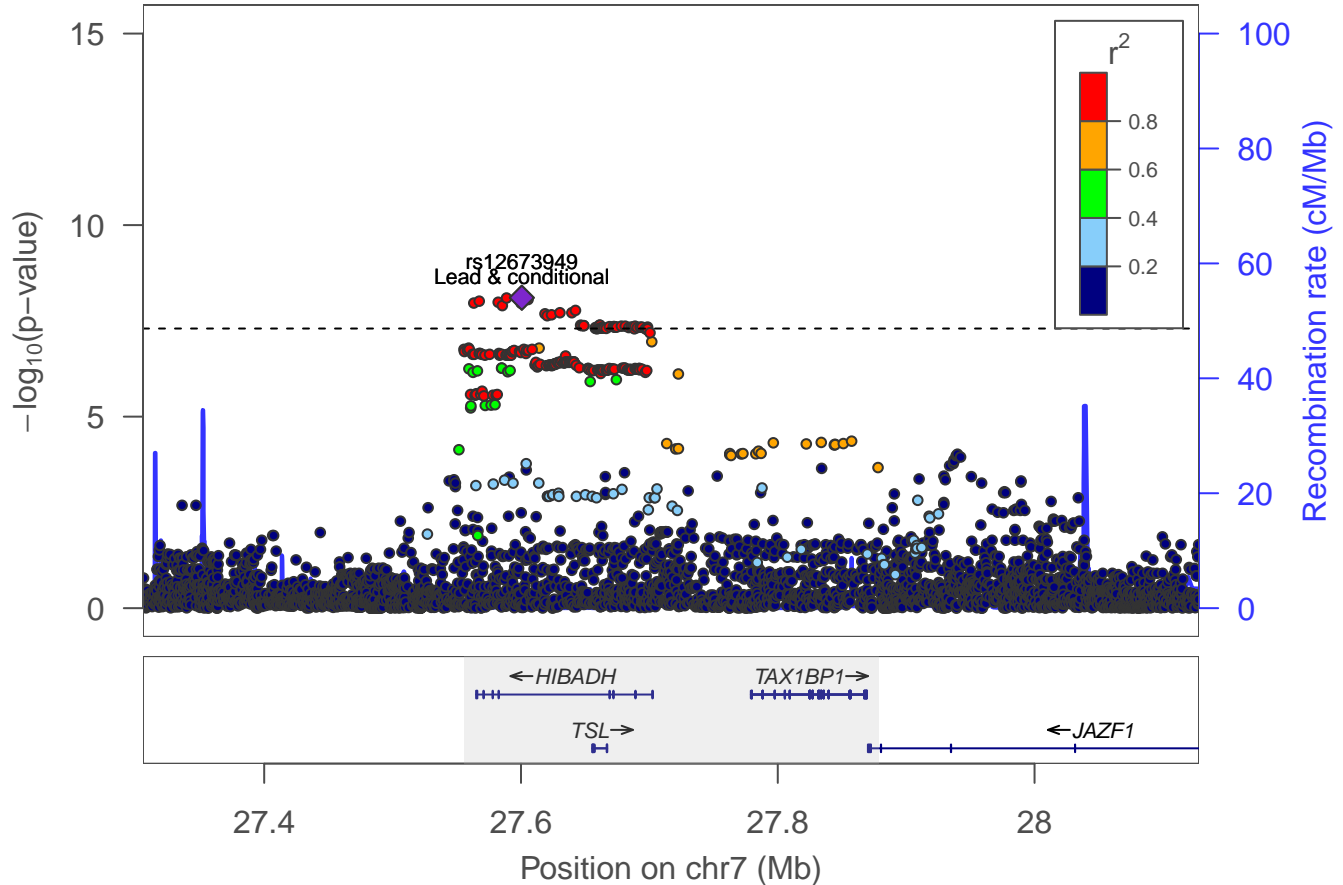

# Drinks per week: locus 26 [chr 7:72.850–73.057Mb]

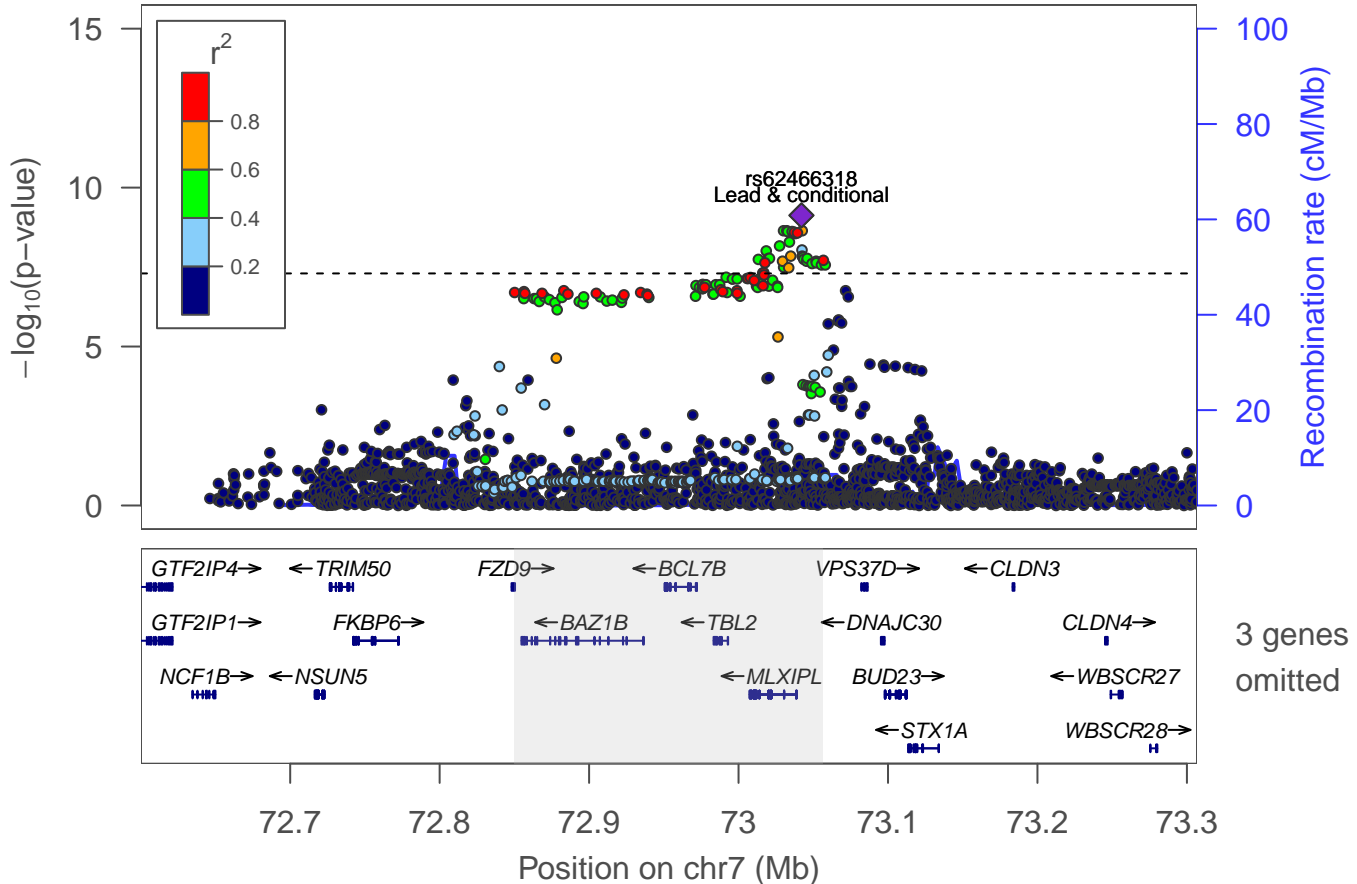



# Drinks per week: locus 27 [chr 7:103.673–103.870Mb]

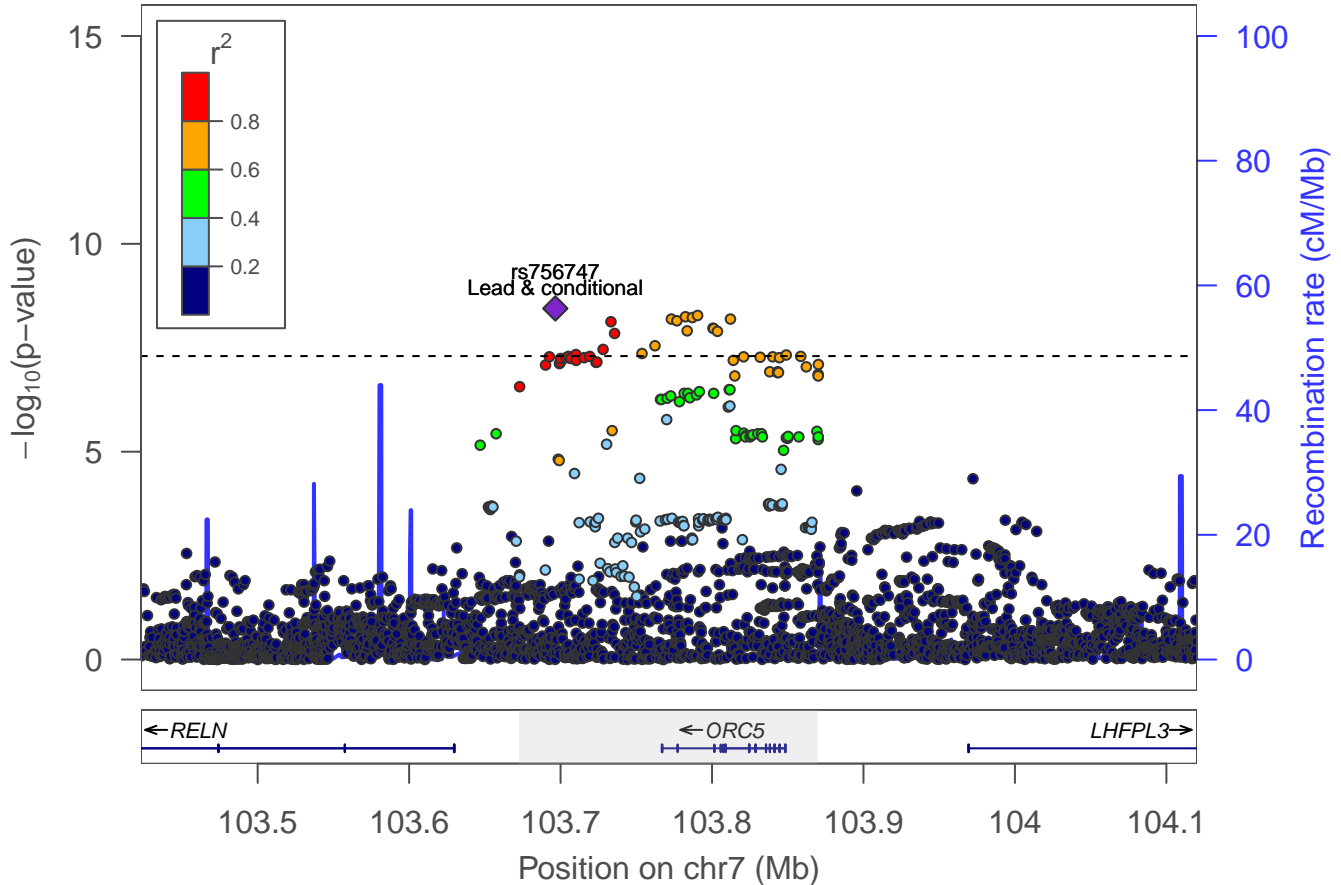

# Drinks per week: locus 28 [chr 7:127.677–127.788Mb]

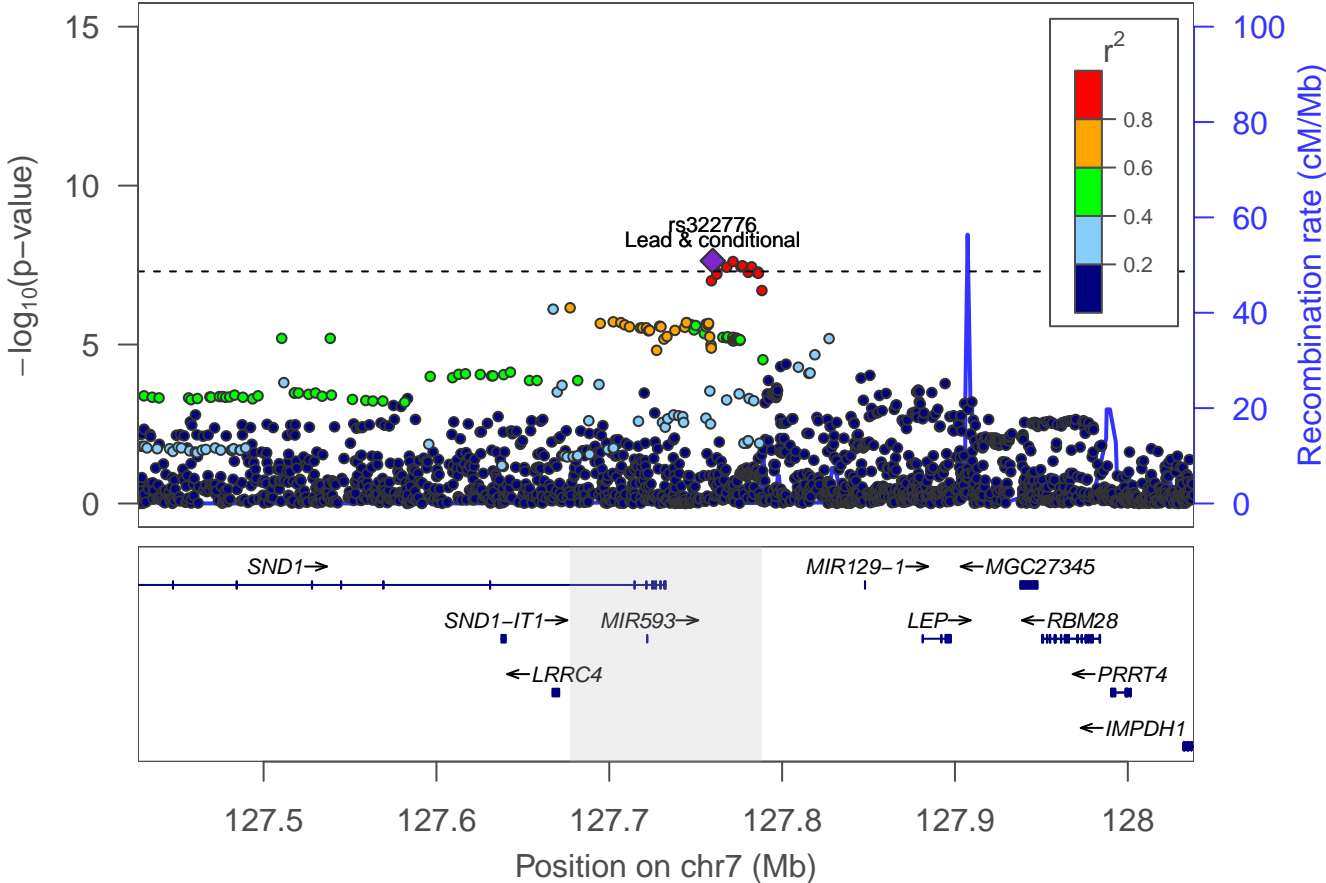

# Drinks per week: locus 29 [chr 7:153.462–153.497Mb]

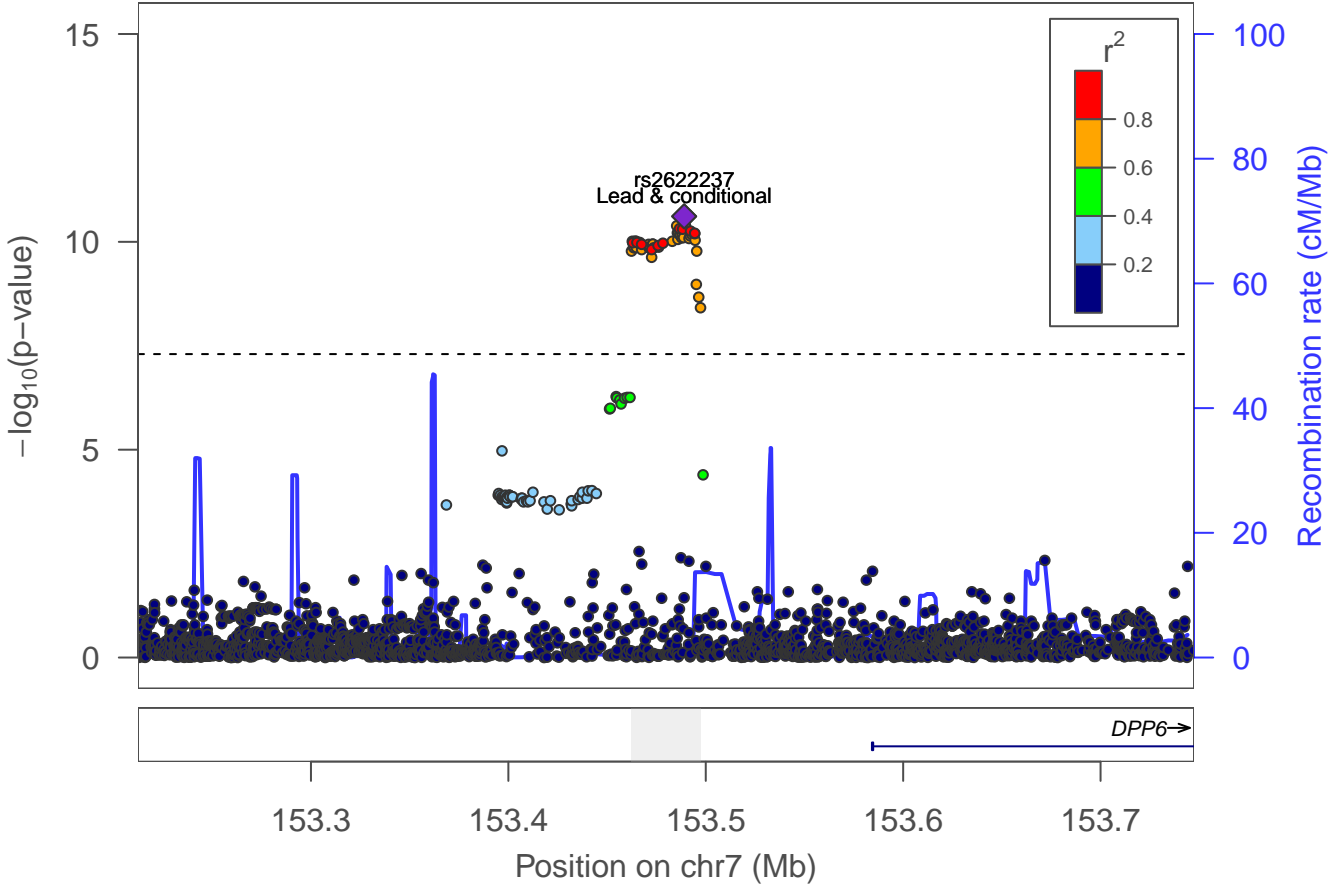

# Drinks per week: locus 30 [chr 9:77.074–77.074Mb]

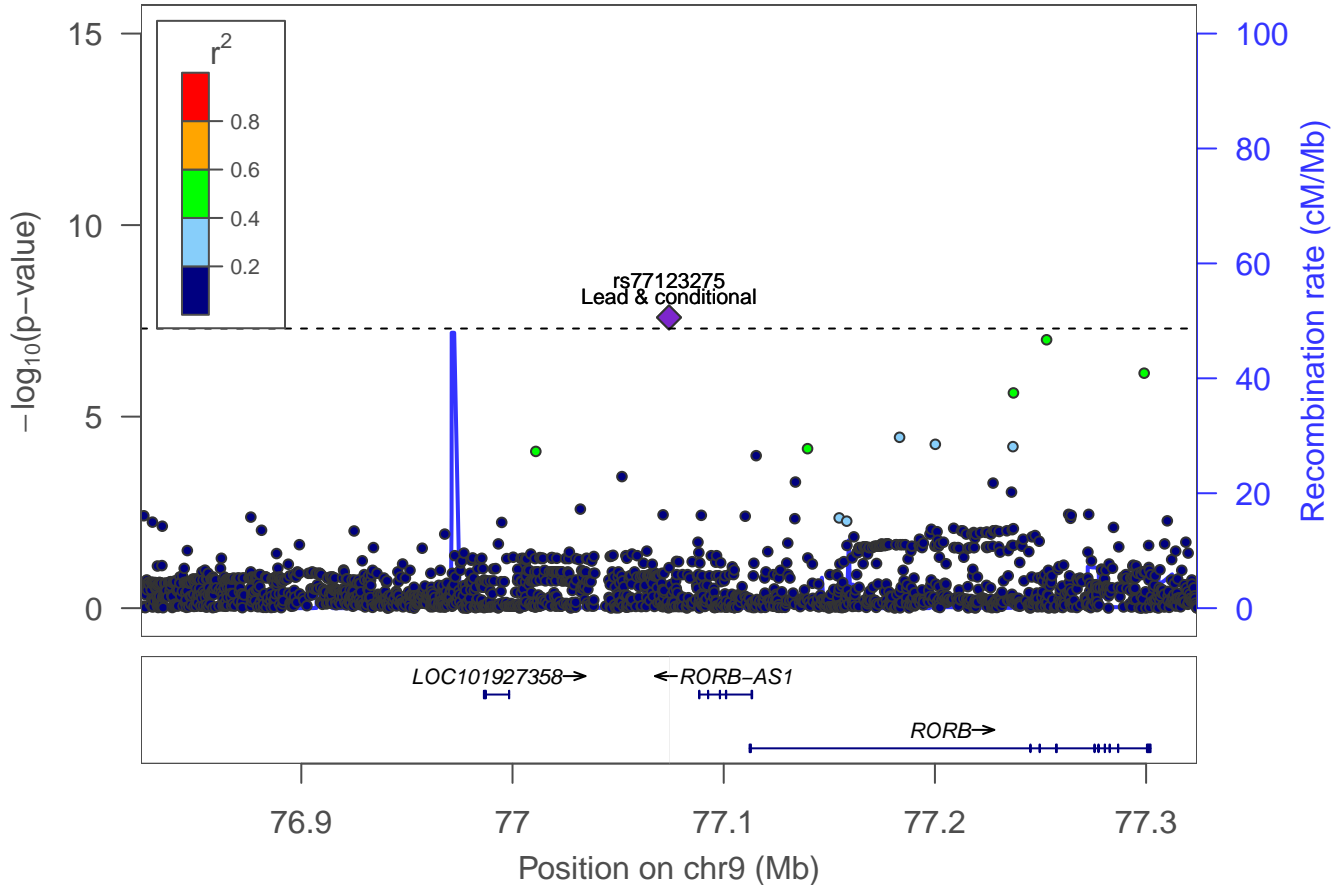

# Drinks per week: locus 31 [chr 9:108.756–108.756Mb]

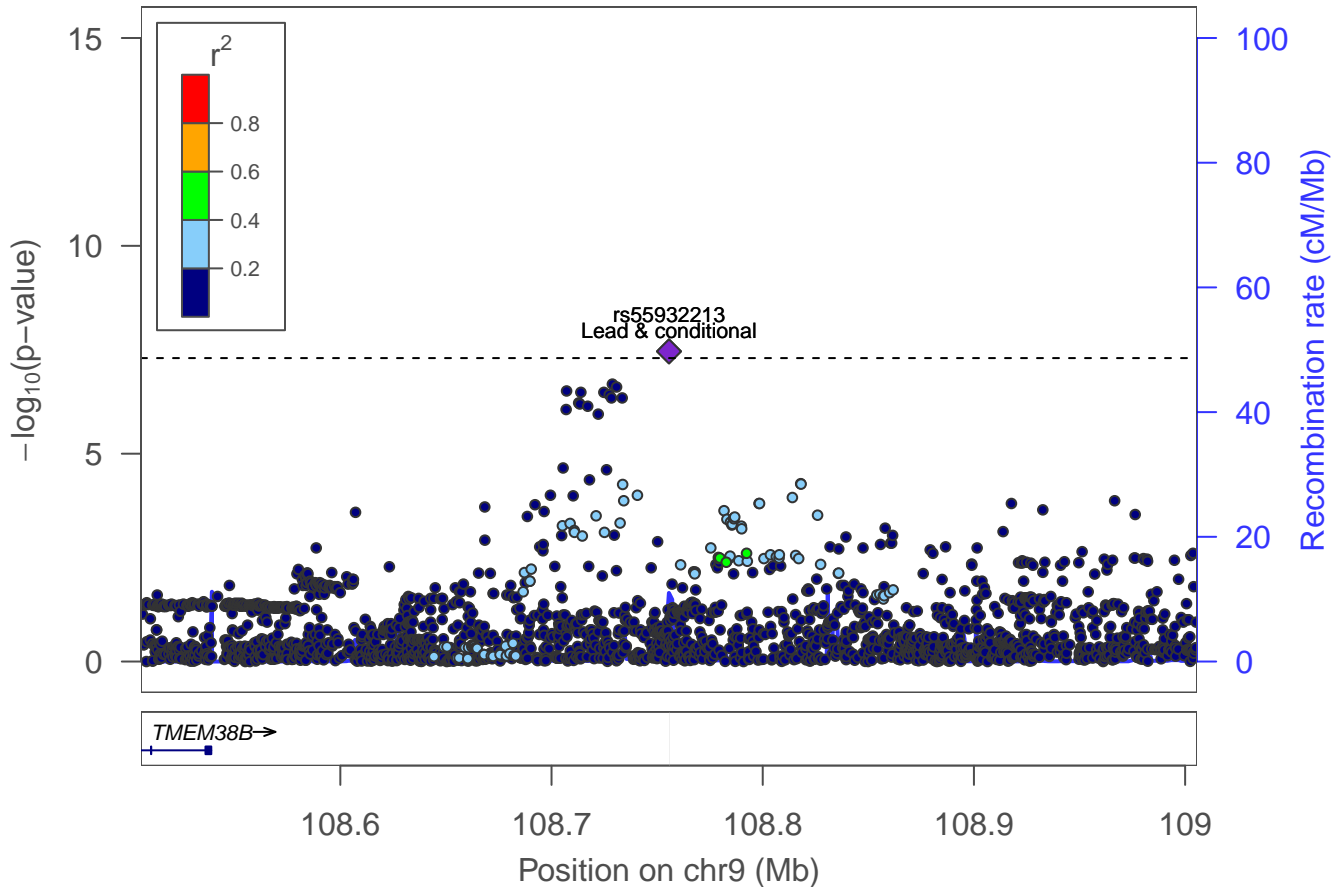

# Drinks per week: locus 32 [chr 9:129.954–129.954Mb]

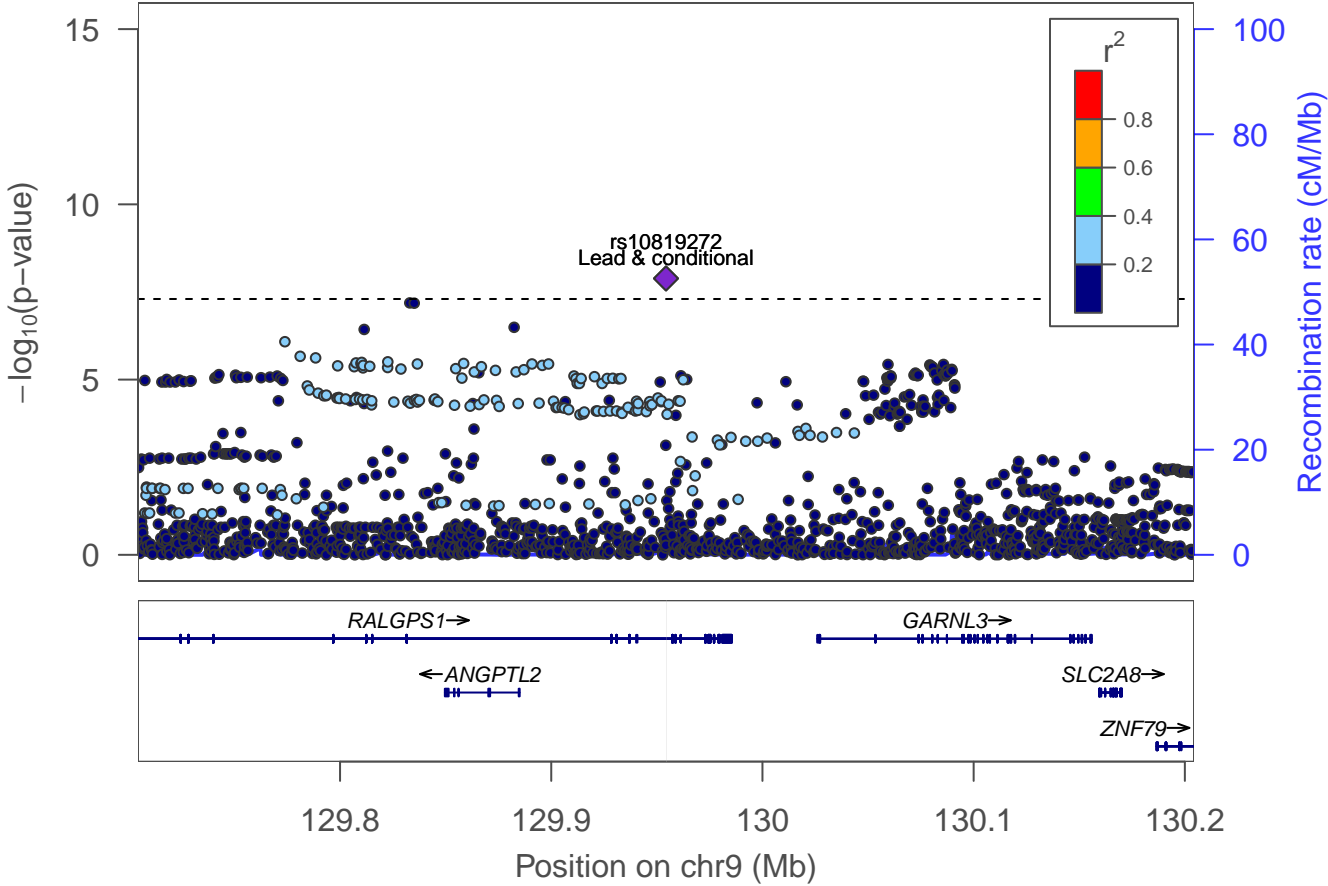

# Drinks per week: locus 33 [chr 9:136.876–136.926Mb]

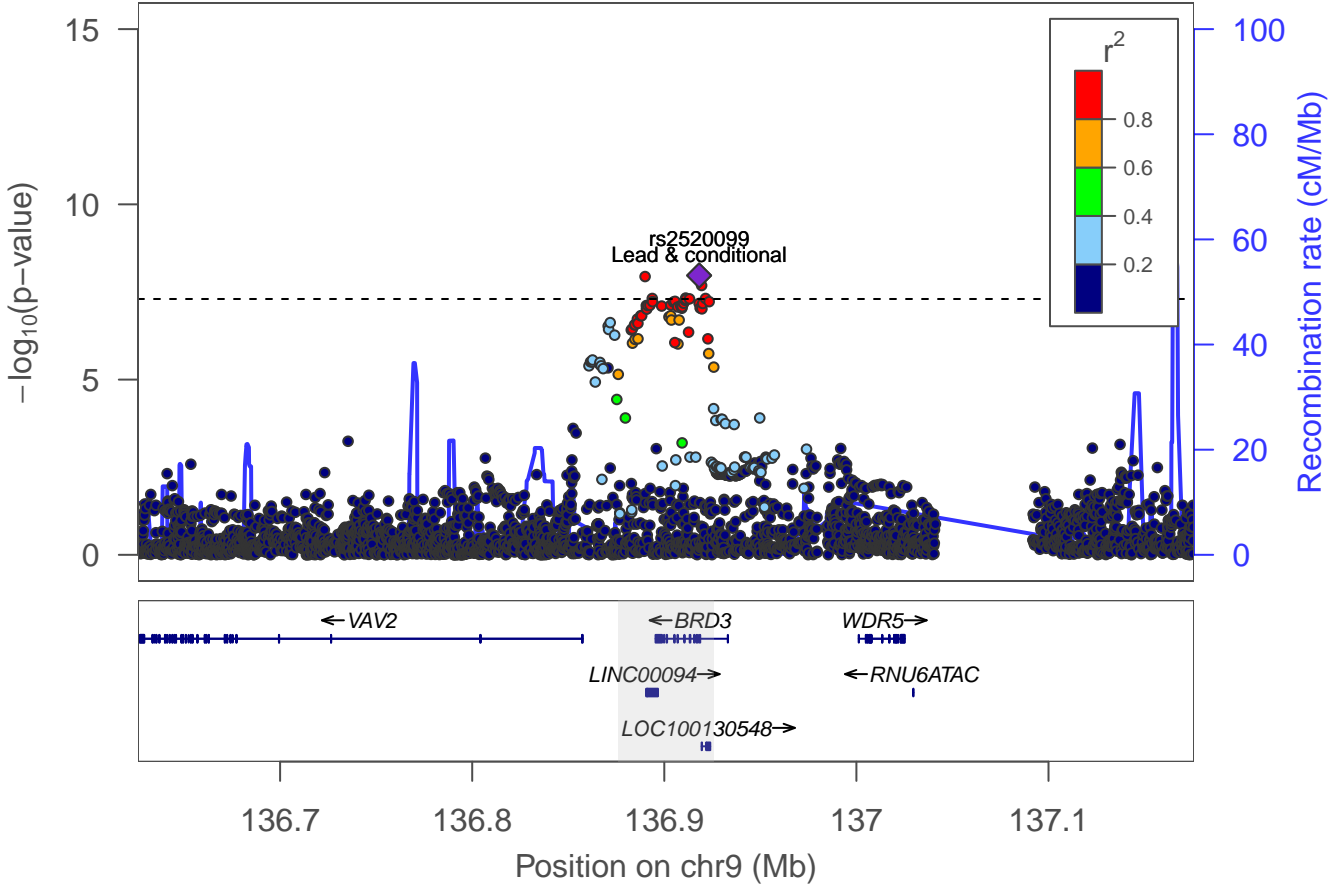

# Drinks per week: locus 34 [chr 10:102.627–102.627Mb]

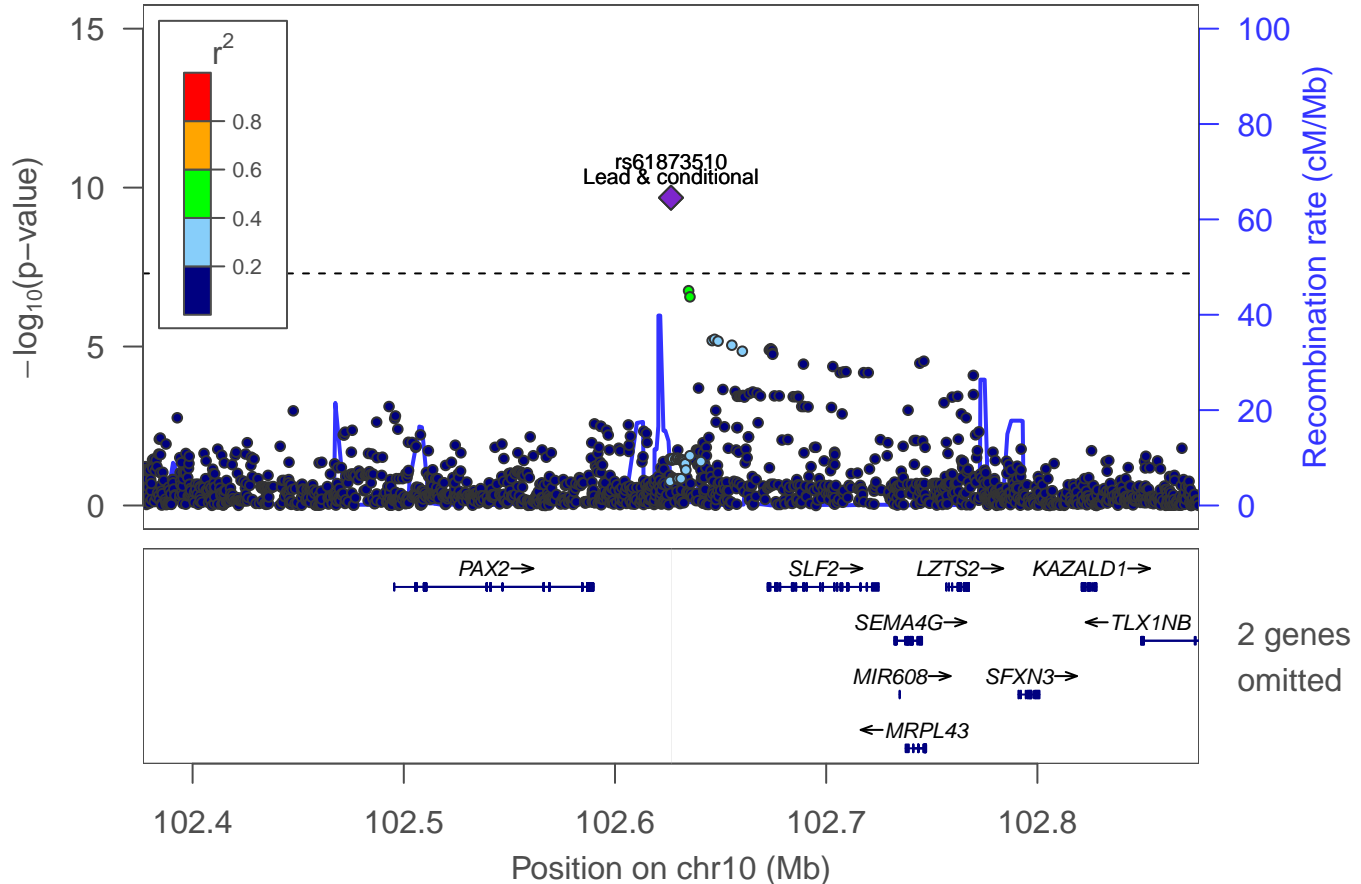



# Drinks per week: locus 35 [chr 10:110.462–110.759Mb]

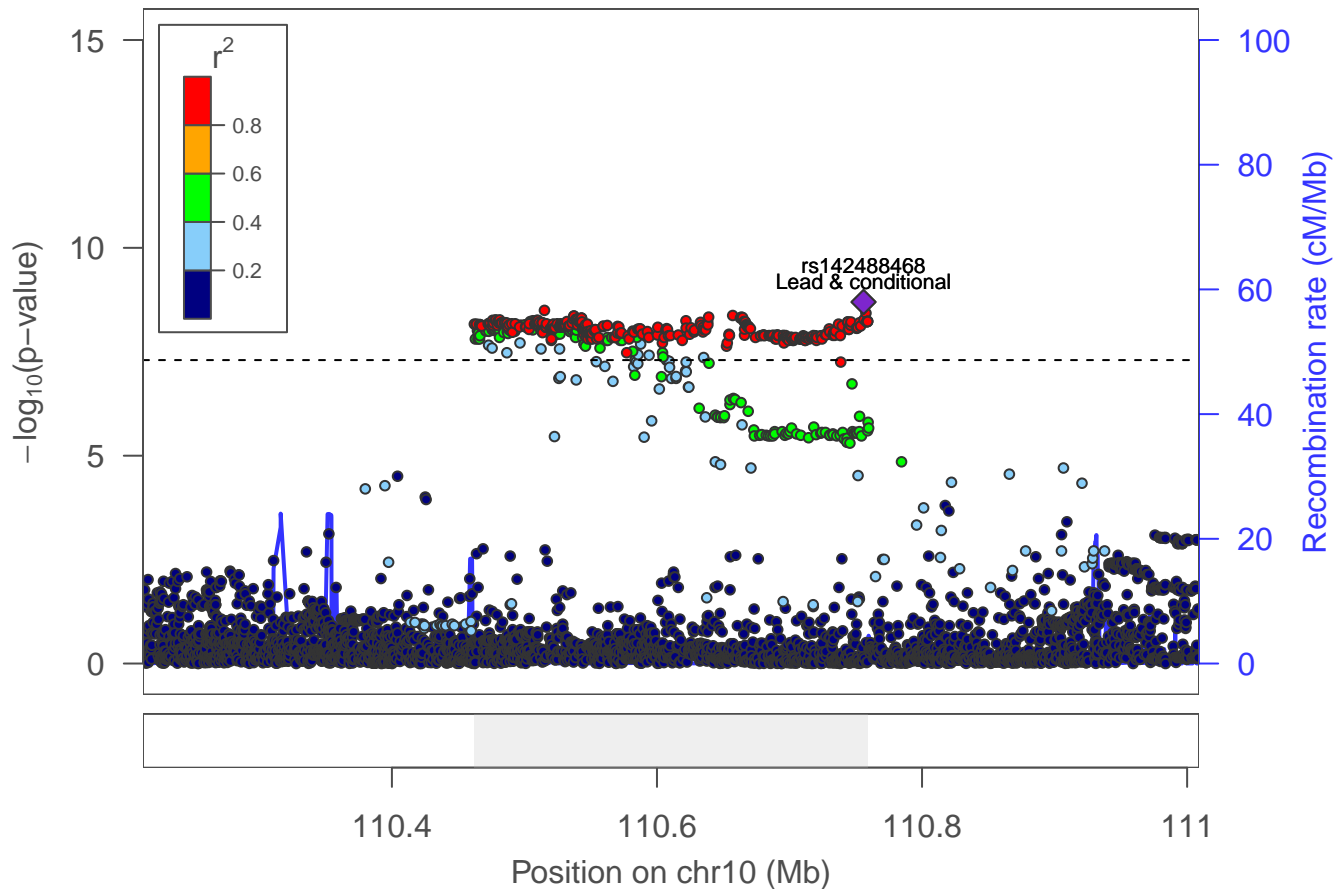

# Drinks per week: locus 36 [chr 11:17.805–17.852Mb]

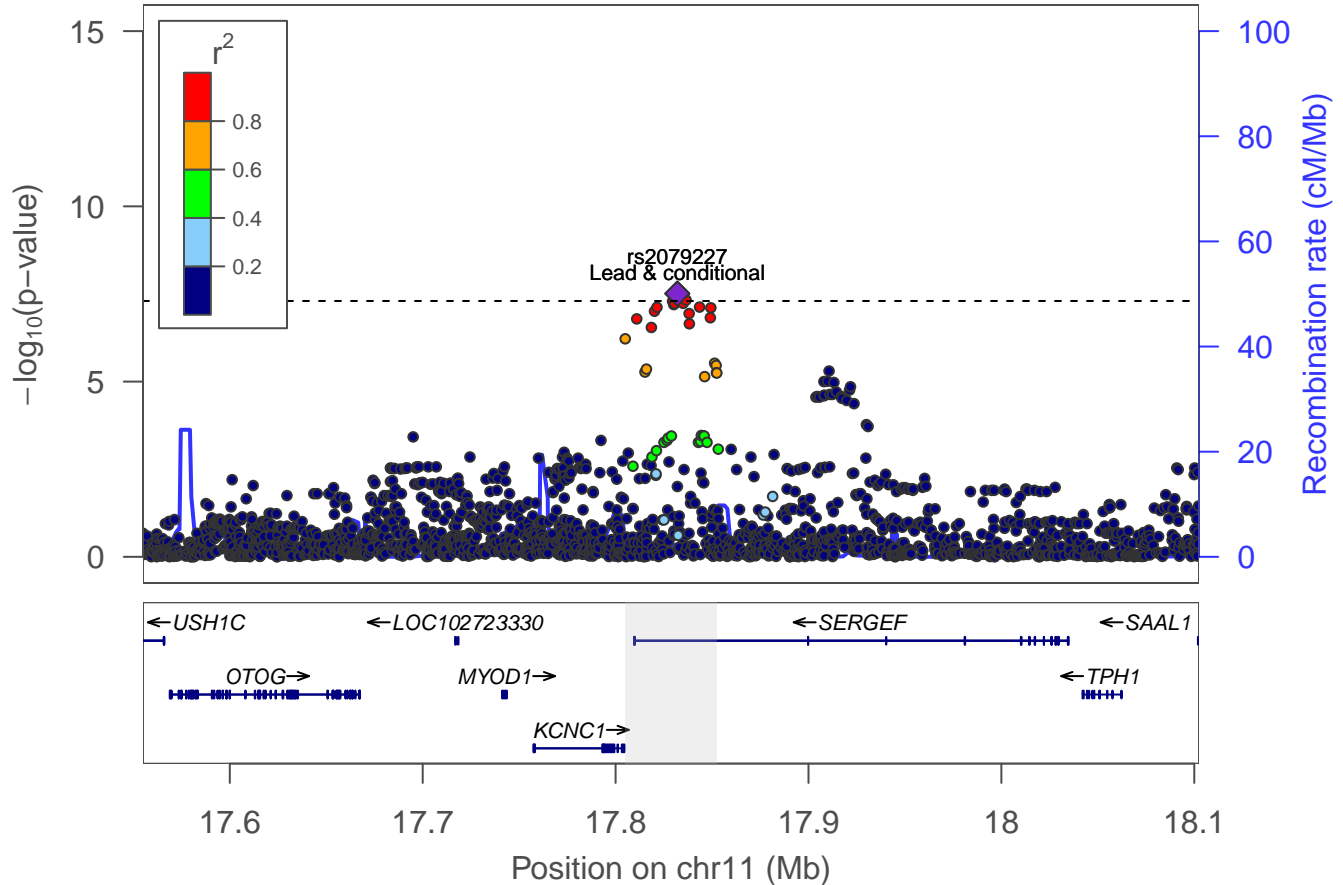

# Drinks per week: locus 37 [chr 11:47.360–47.947Mb]

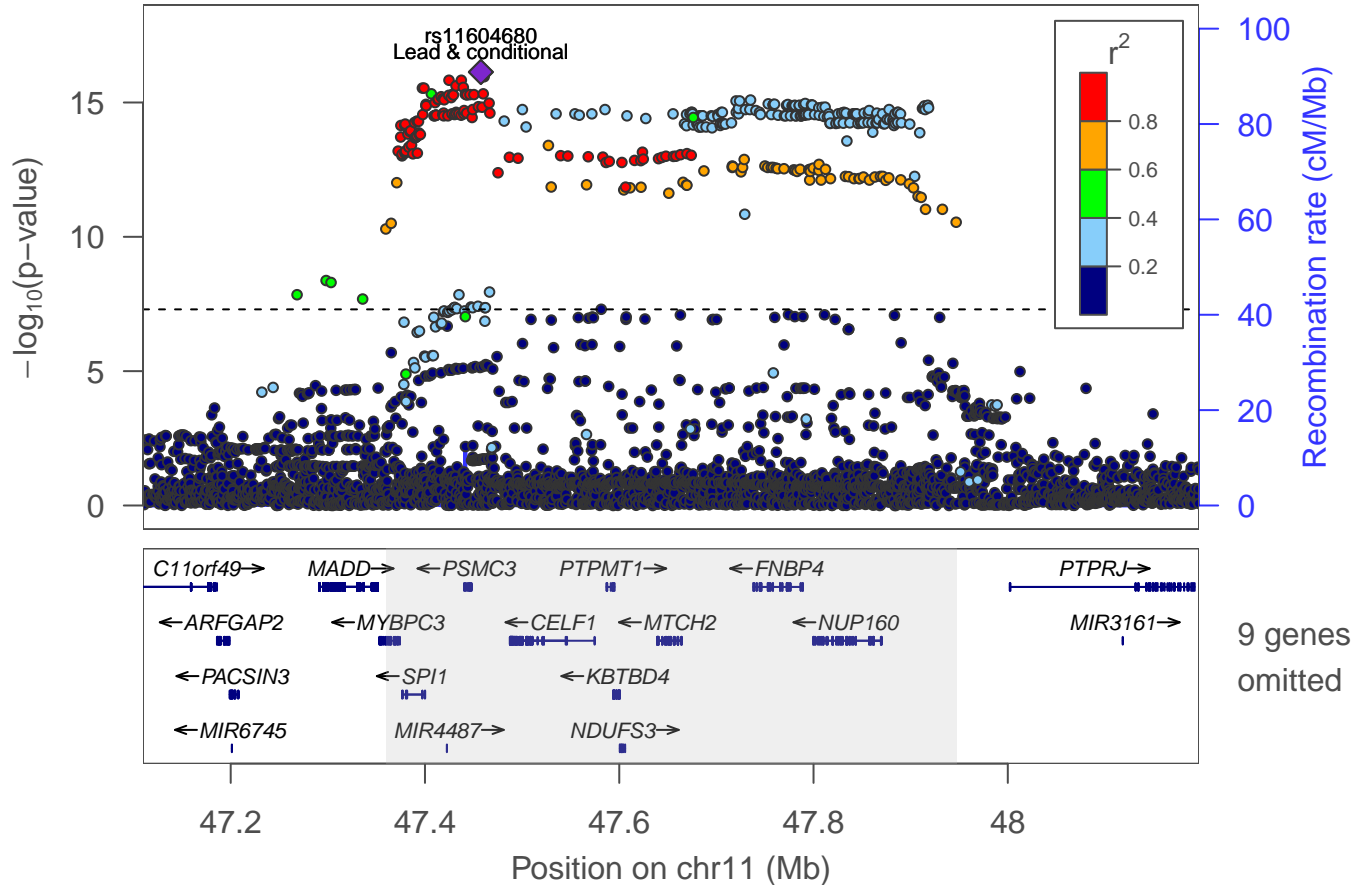

# Drinks per week: Locus 38 [chr 11: 113.199–113.749Mb]

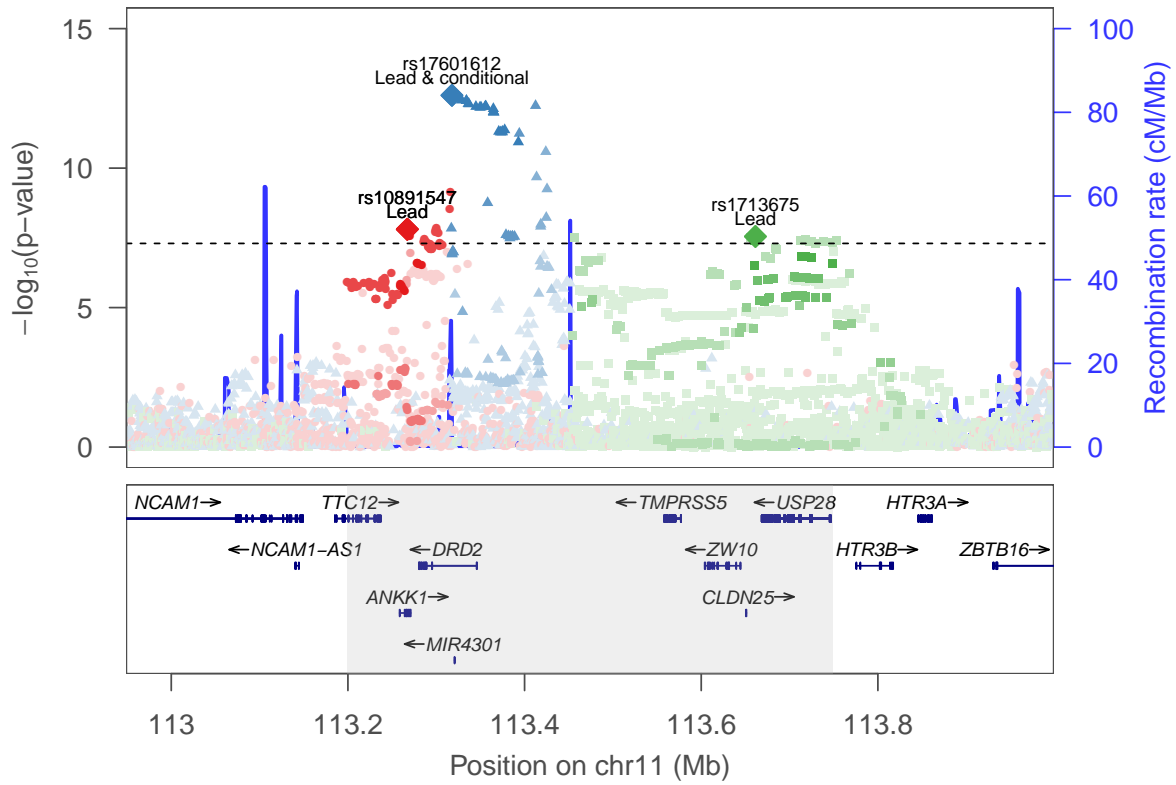

rs1713675 ■  
 rs17601612 ▲  
 rs10891547 ●

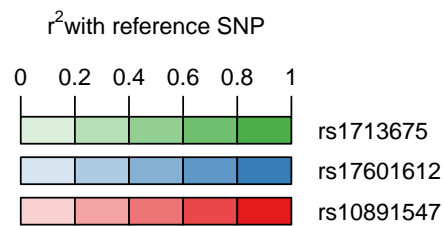

# Drinks per week: locus 39 [chr 11:116.074–116.102Mb]

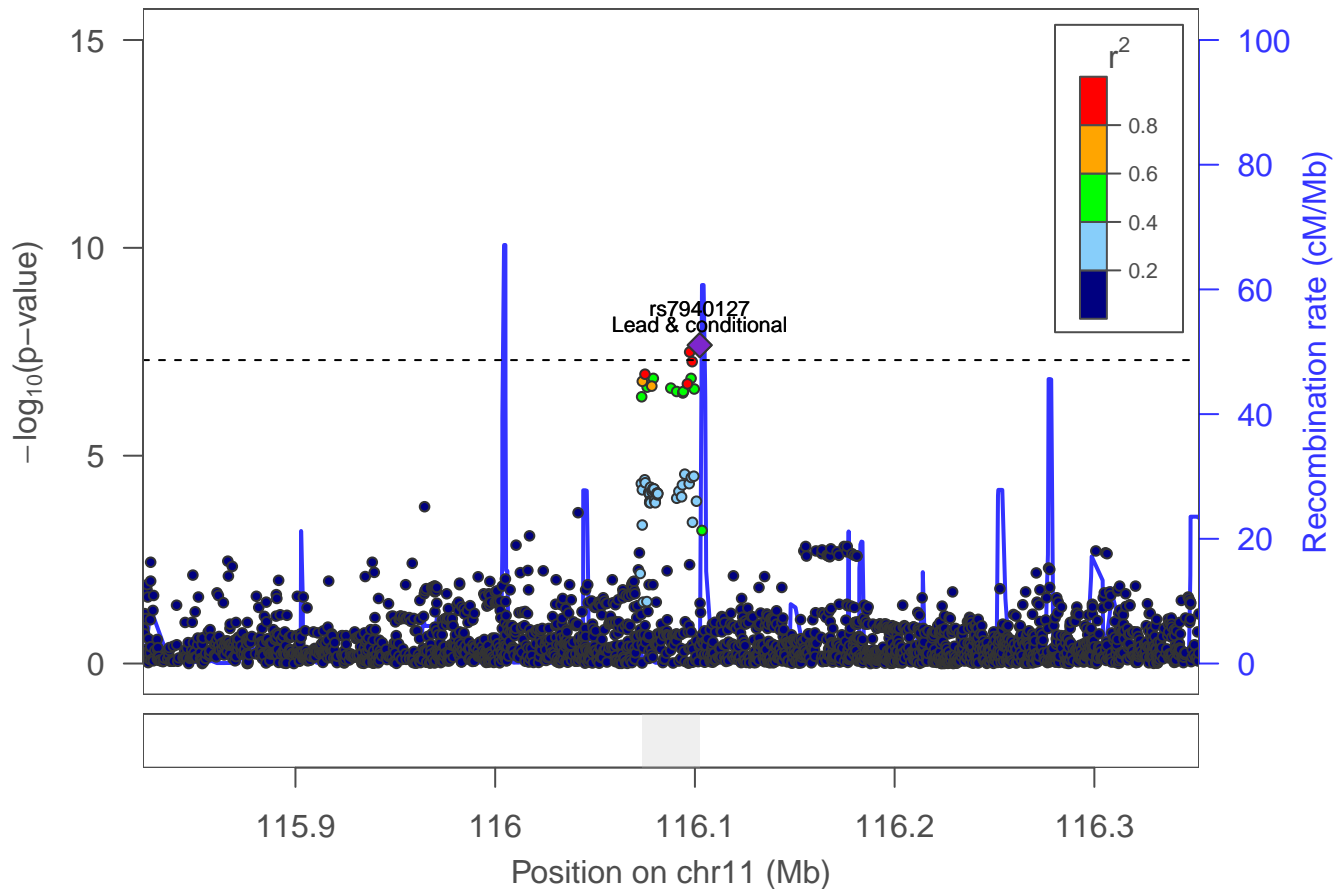

# Drinks per week: locus 40 [chr 11:121.523–121.553Mb]

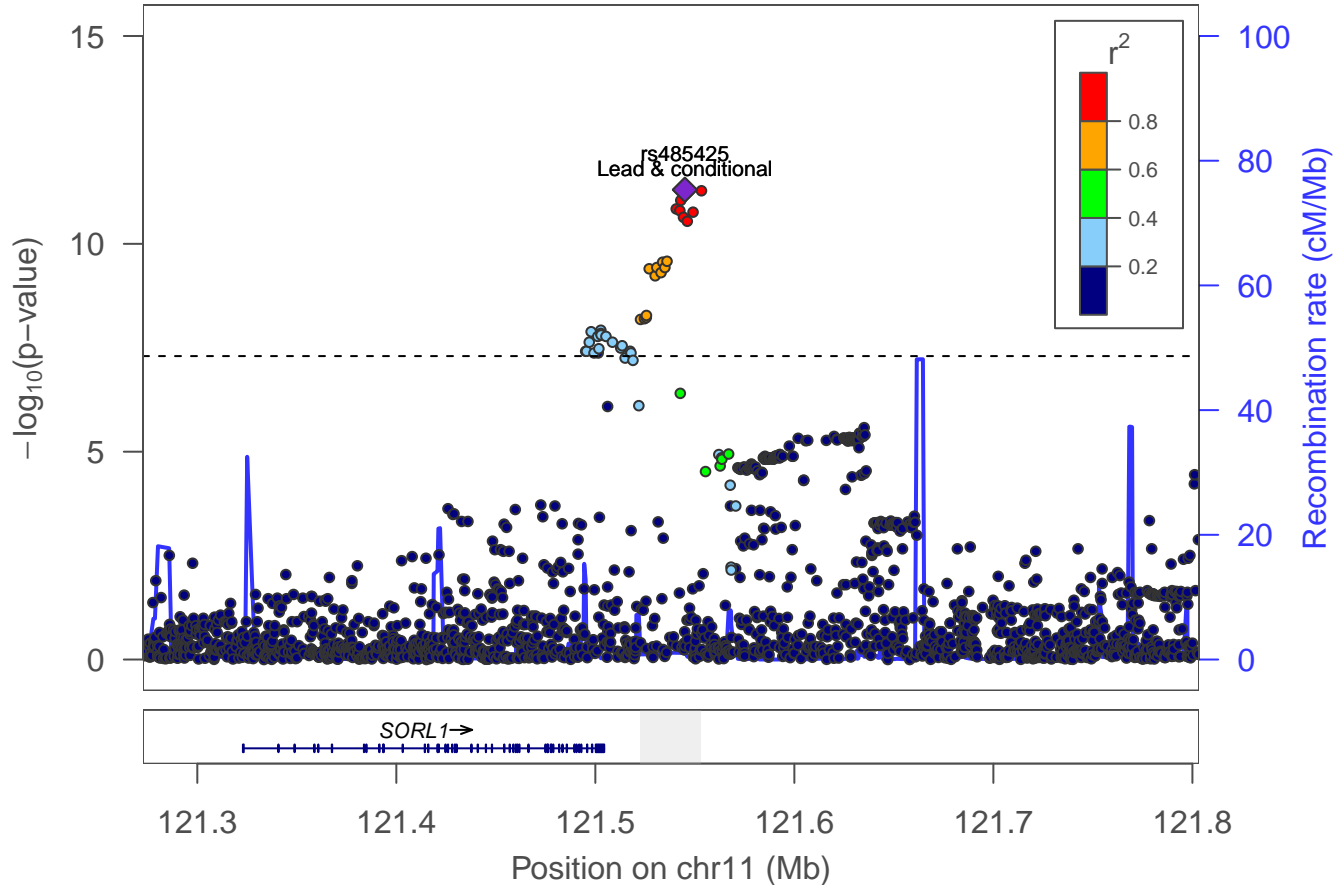

# Drinks per week: locus 41 [chr 12:50.208–50.286Mb]

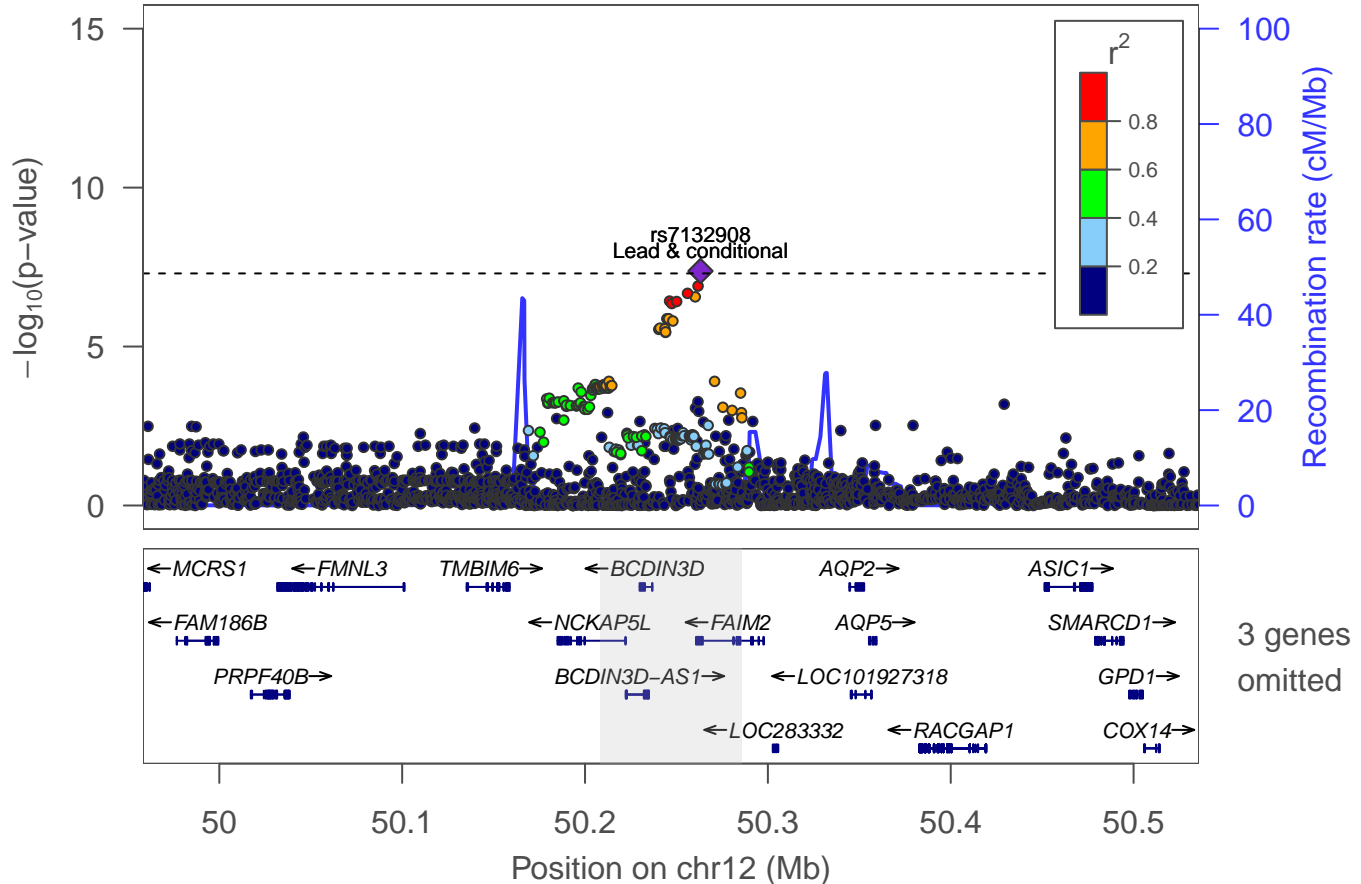

# Drinks per week: locus 42 [chr 14:57.270–57.293Mb]

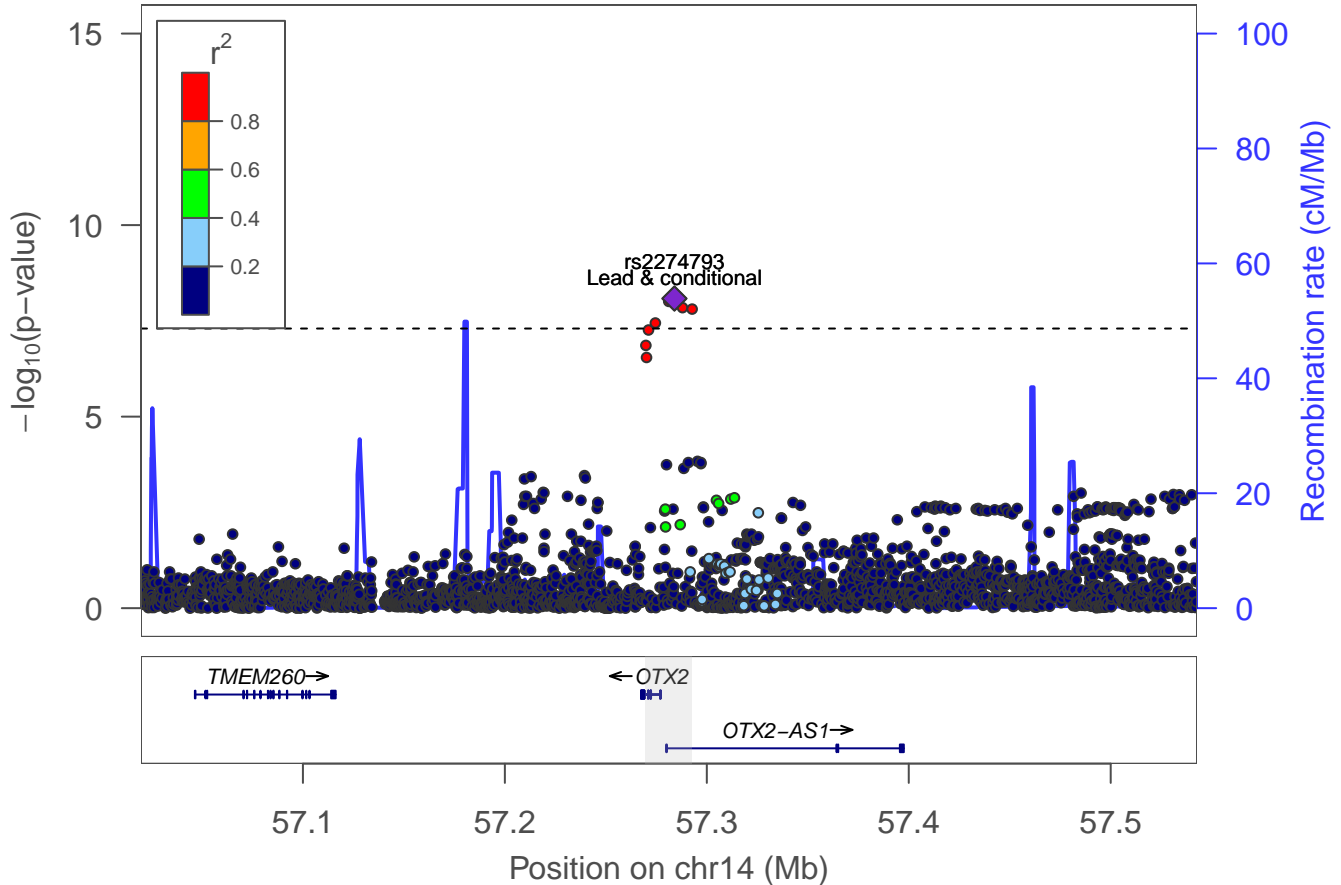



# Drinks per week: locus 43 [chr 14:94.838–94.845Mb]

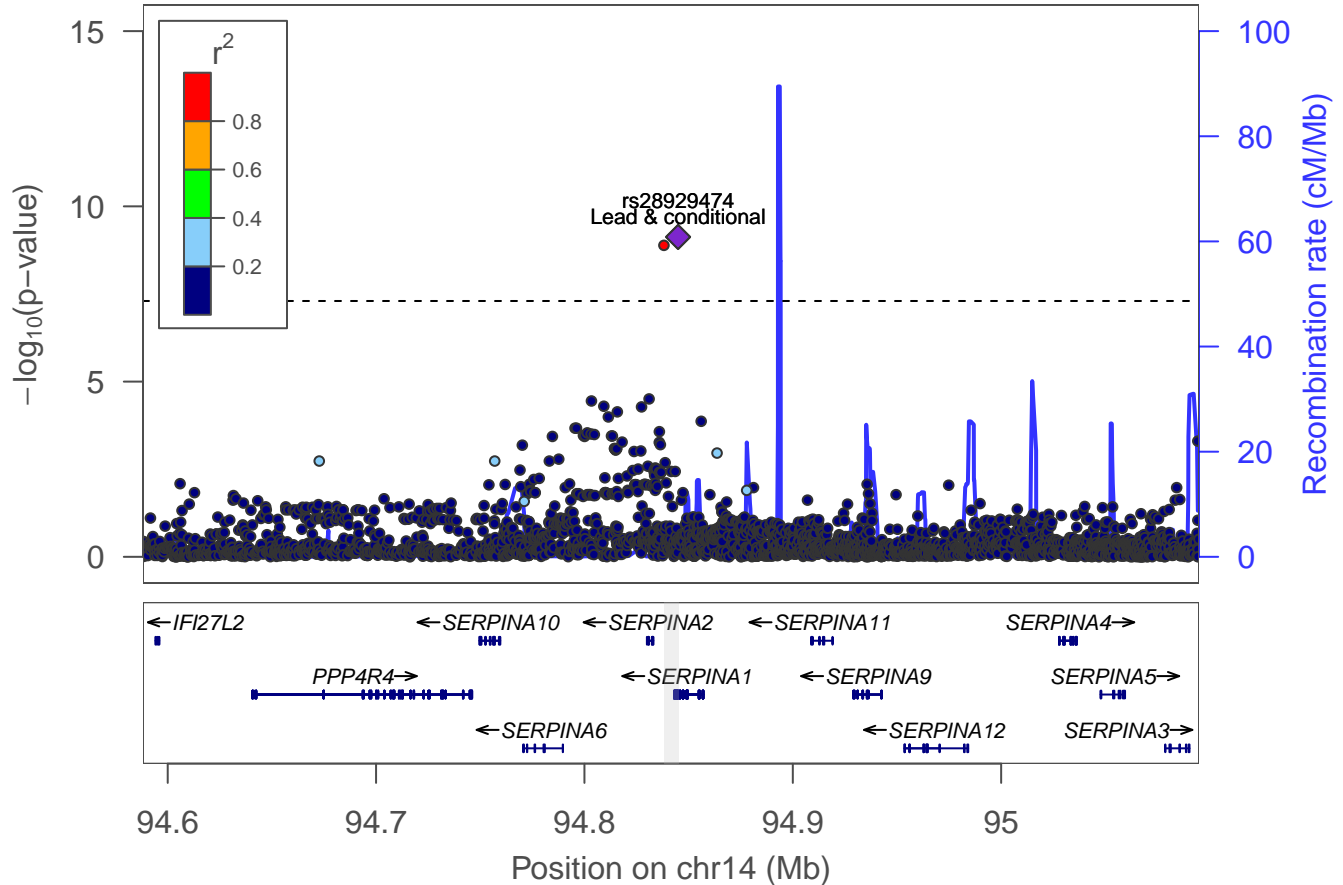

# Drinks per week: locus 44 [chr 15:49.261–49.677Mb]

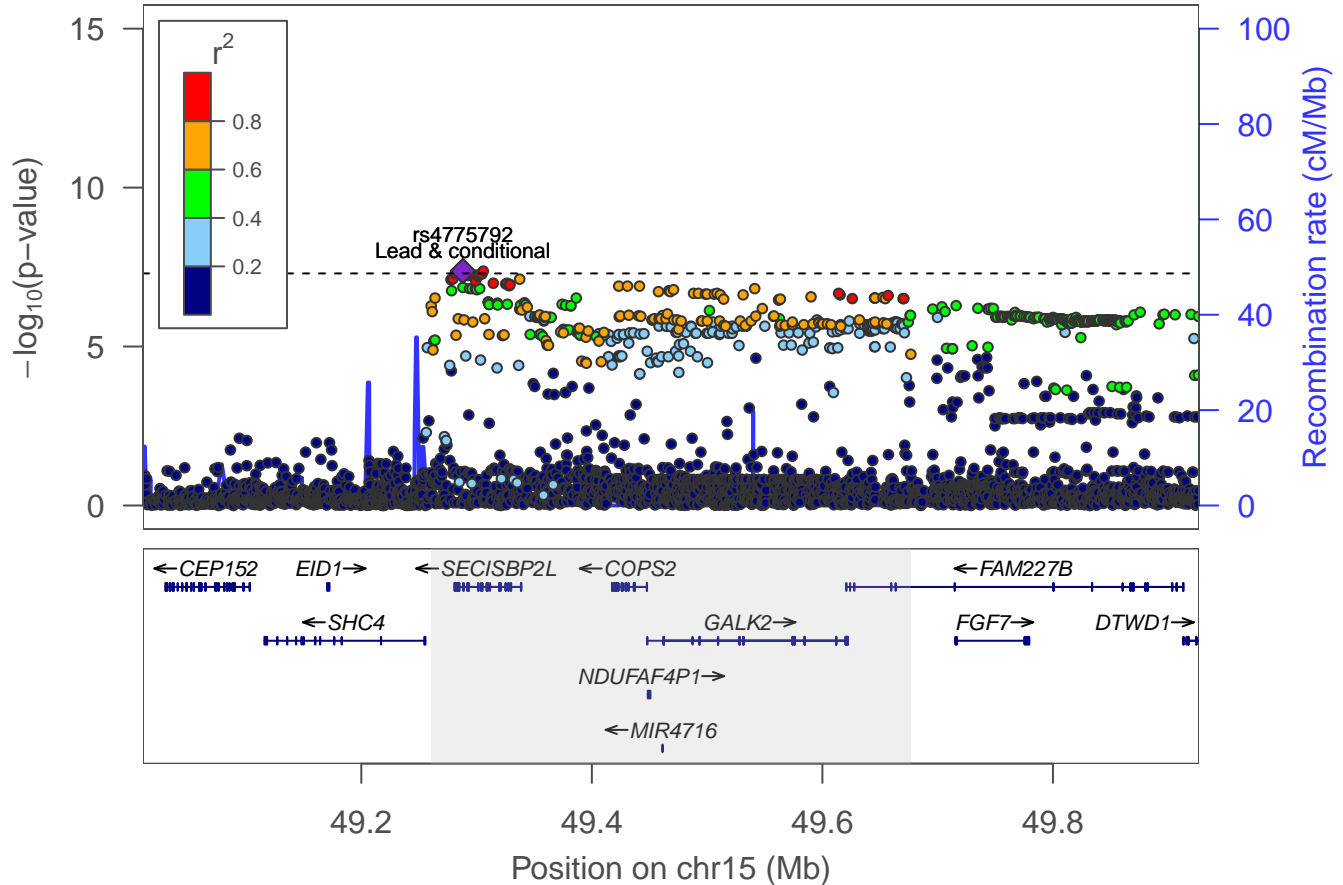

# Drinks per week: locus 45 [chr 15:56.845–57.261Mb]

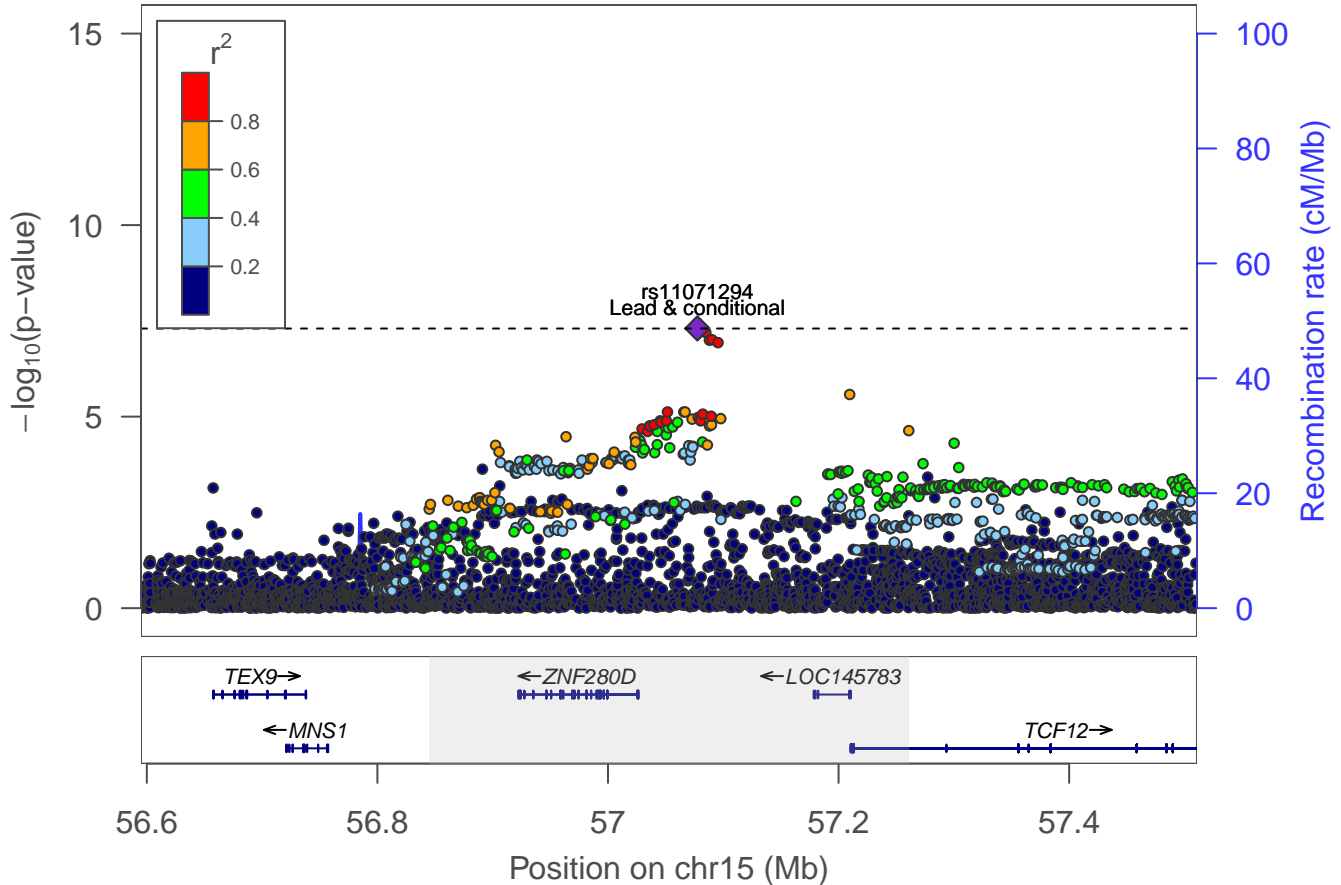

# Drinks per week: locus 46 [chr 15:74.593–74.672Mb]

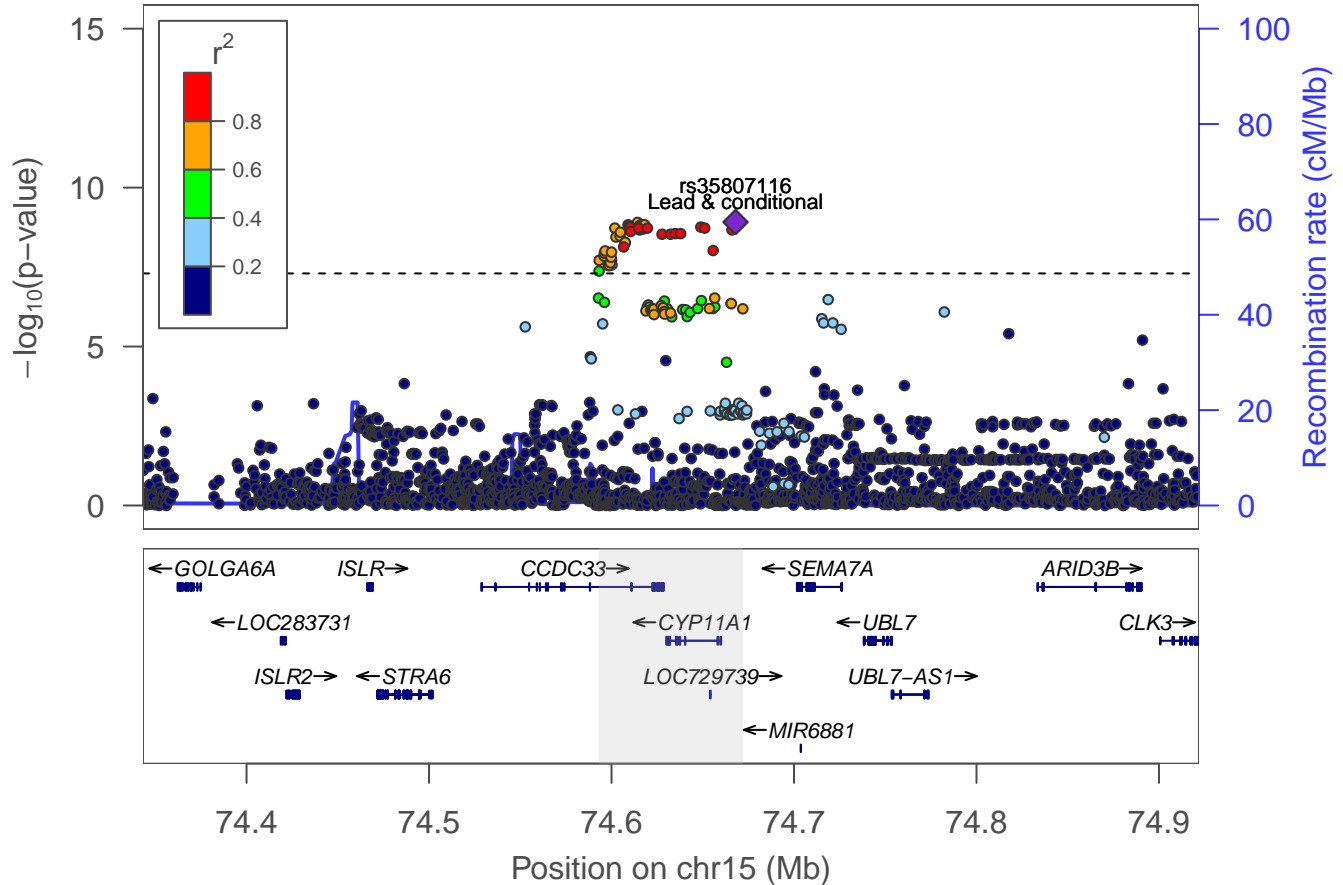

# Drinks per week: locus 47 [chr 16:7.325–7.354Mb]

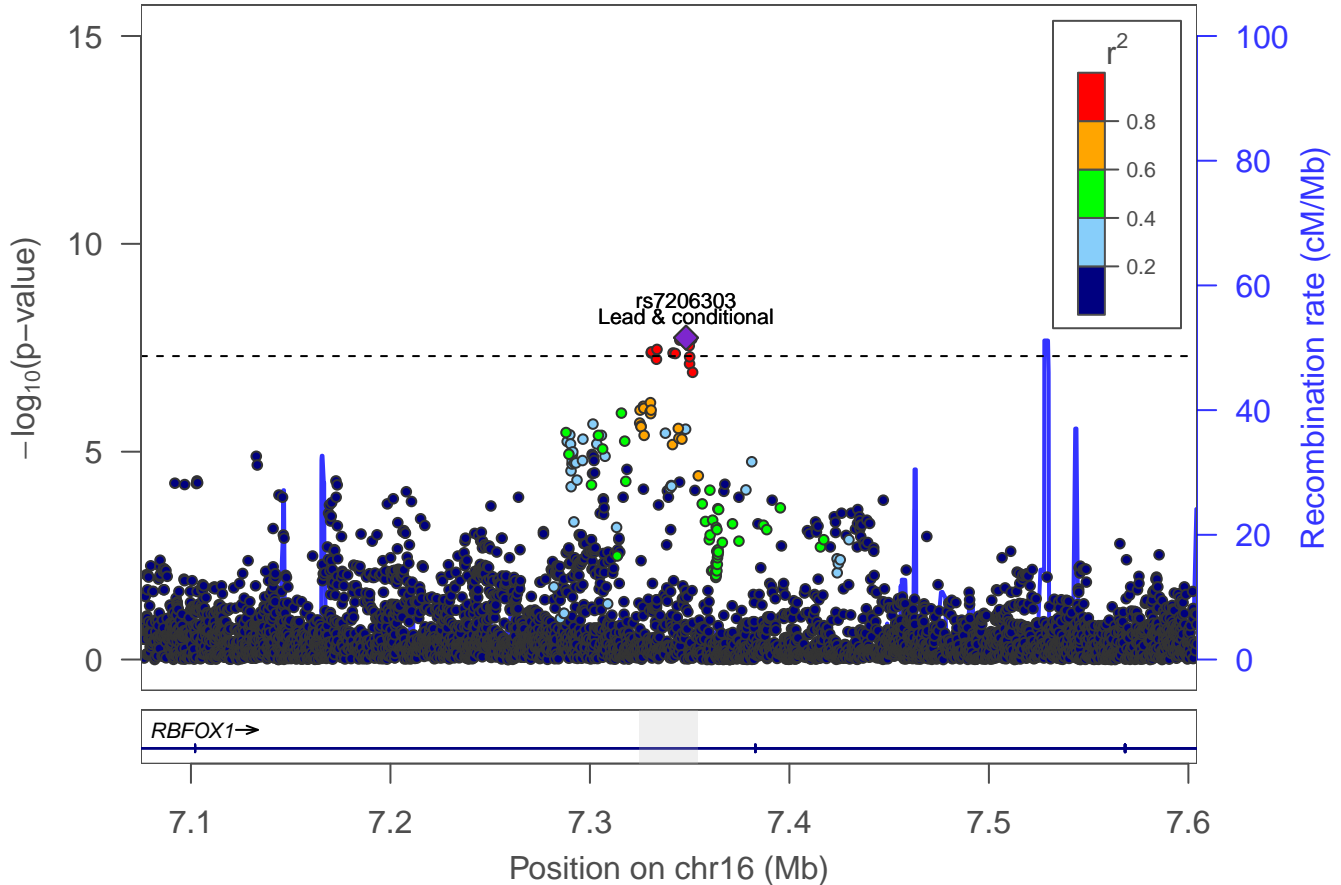

# Drinks per week: Locus 48 [chr 16: 13.731–13.761Mb]

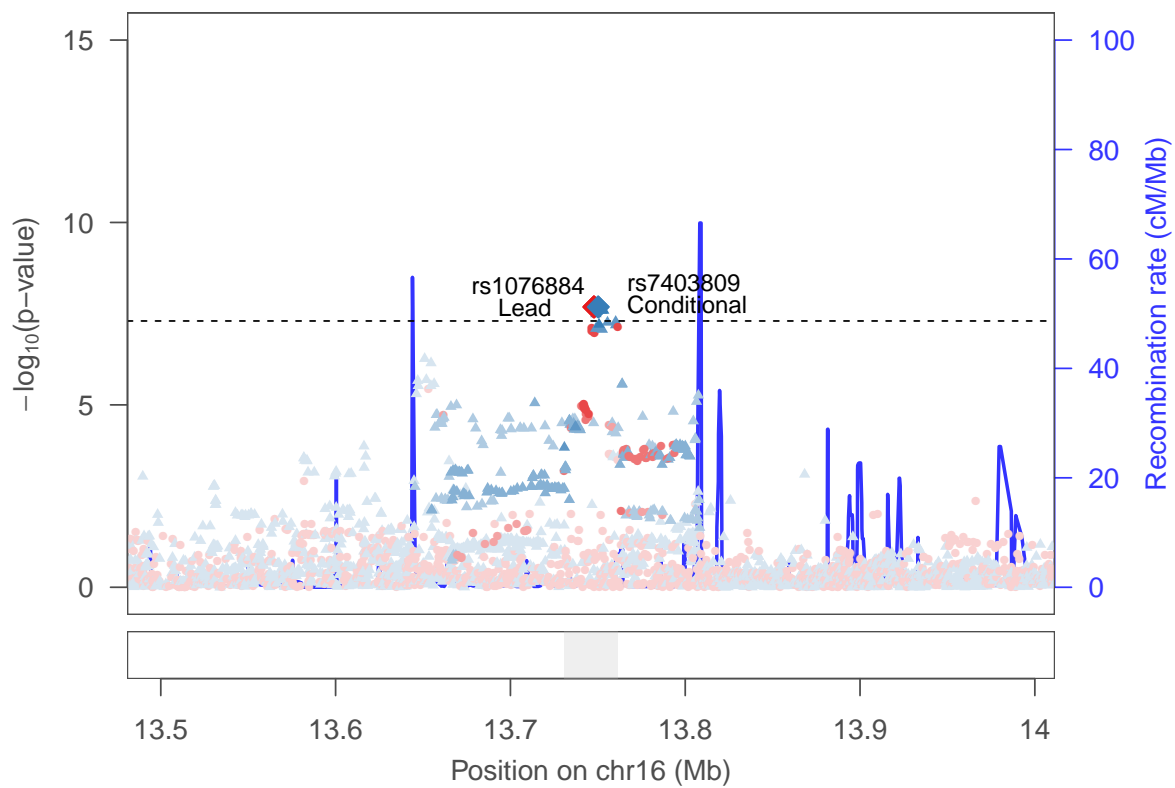

rs7403809 ▲  
rs1076884 ●

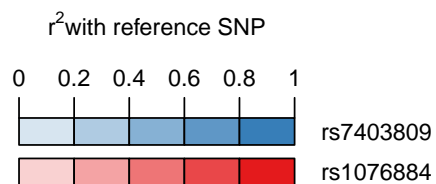

# Drinks per week: locus 49 [chr 16:24.682–24.811Mb]

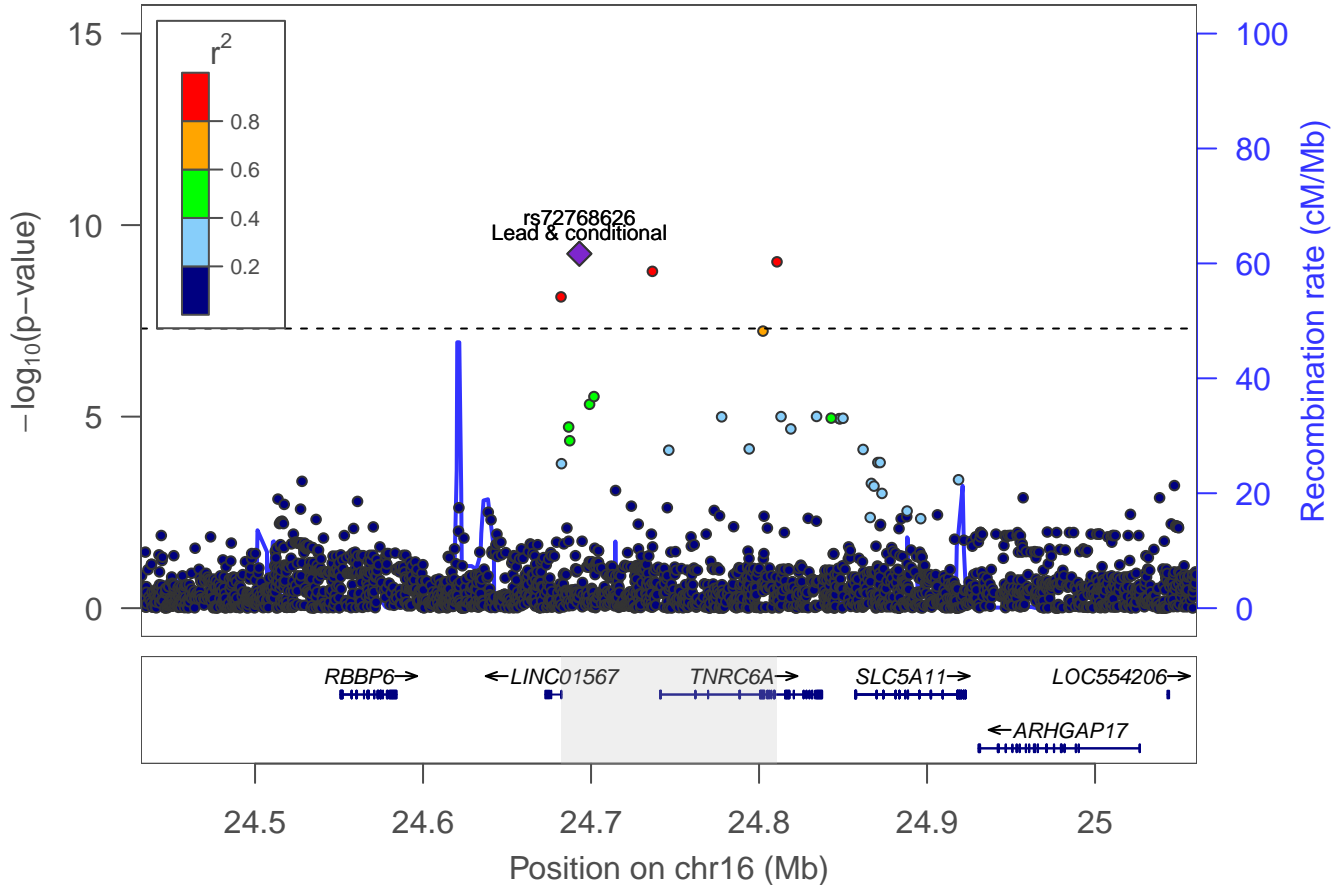

# Drinks per week: Locus 50 [chr 16: 28.338–28.953Mb]

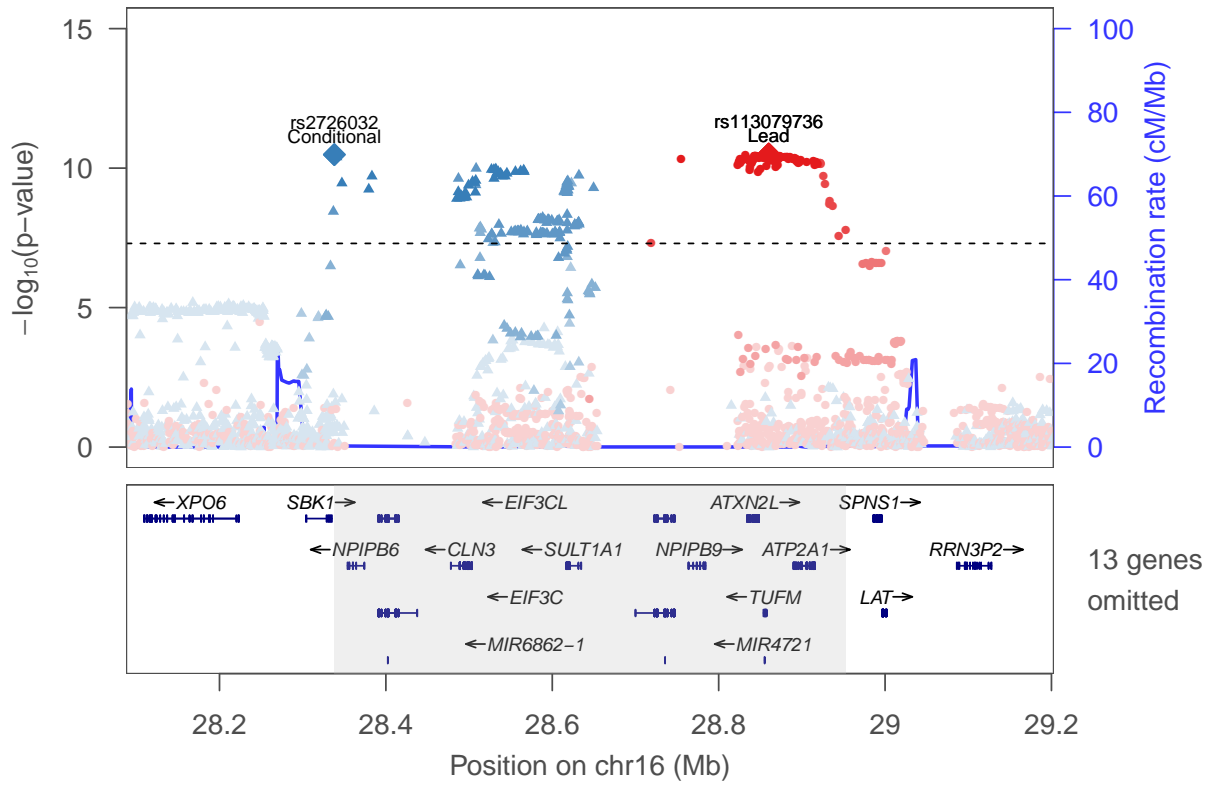

rs2726032 ▲  
 rs113079736 ●

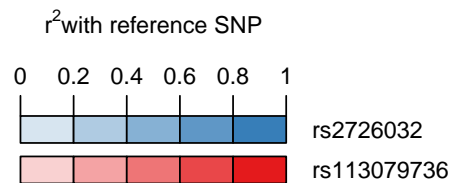



# Drinks per week: locus 51 [chr 16:29.878–29.911Mb]

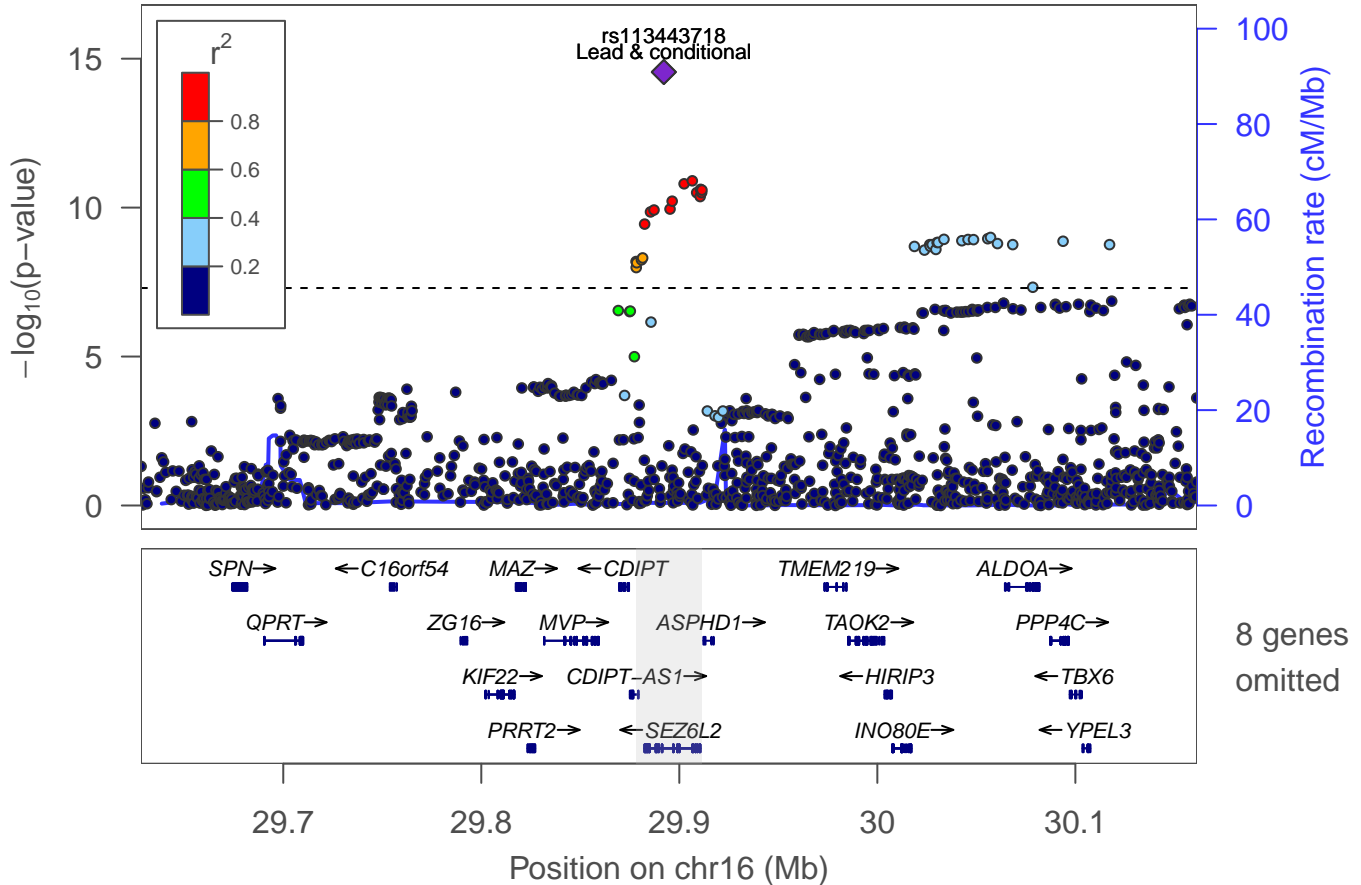

# Drinks per week: locus 52 [chr 17:7.439–7.456Mb]

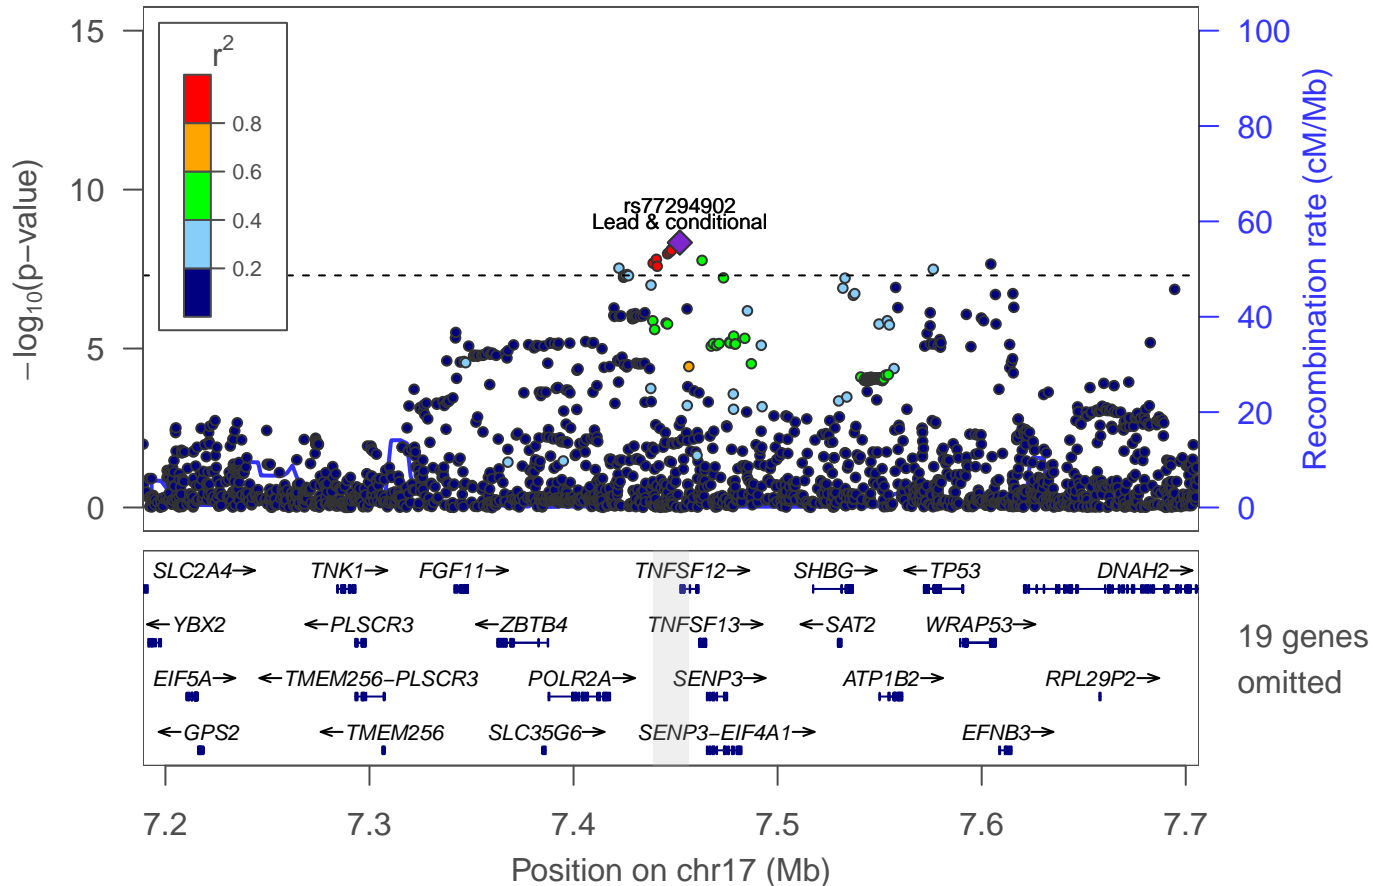

# Drinks per week: locus 53 [chr 17:7.732–7.759Mb]

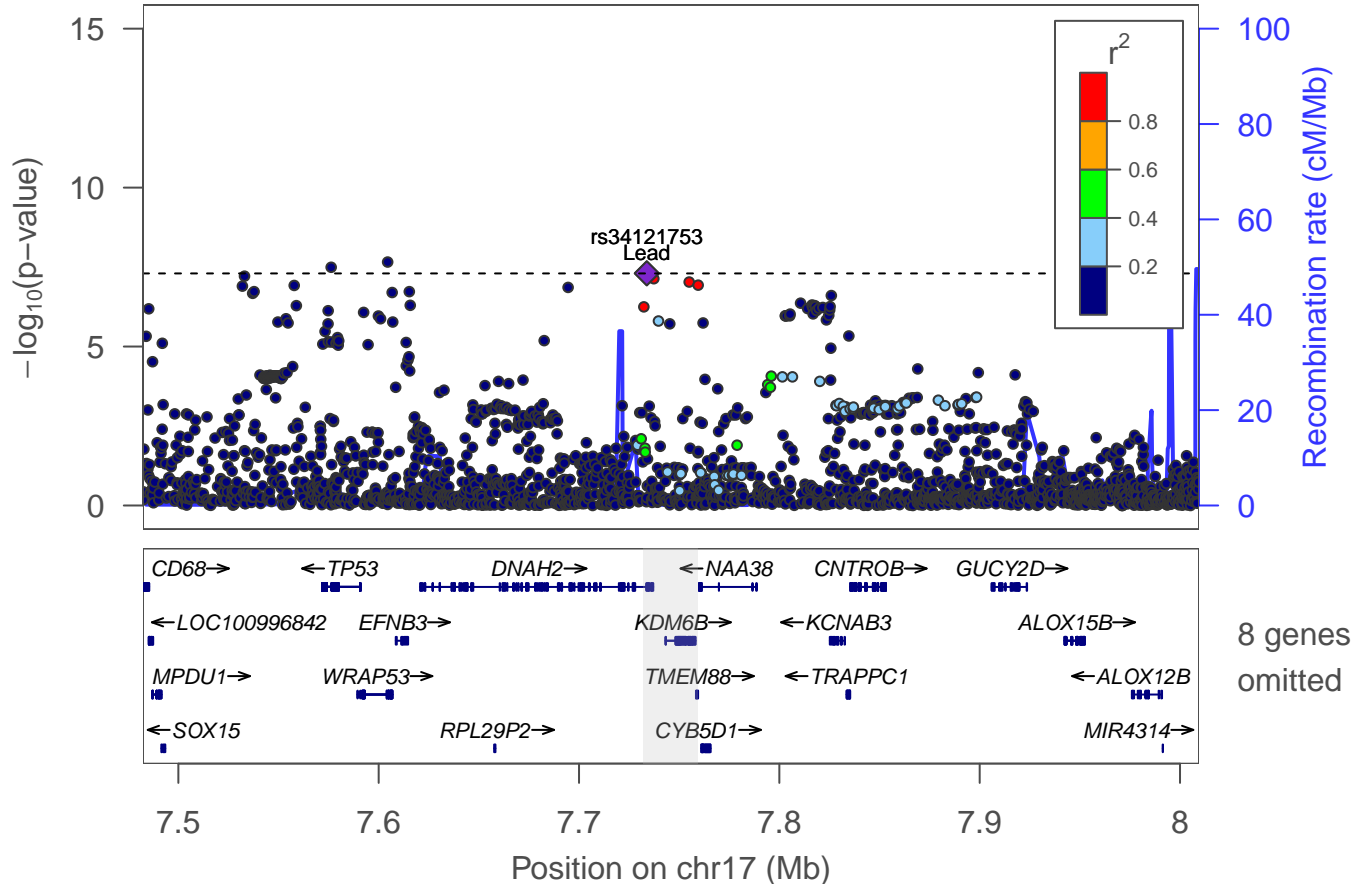

# Drinks per week: locus 54 [chr 17:43.463–44.866Mb]

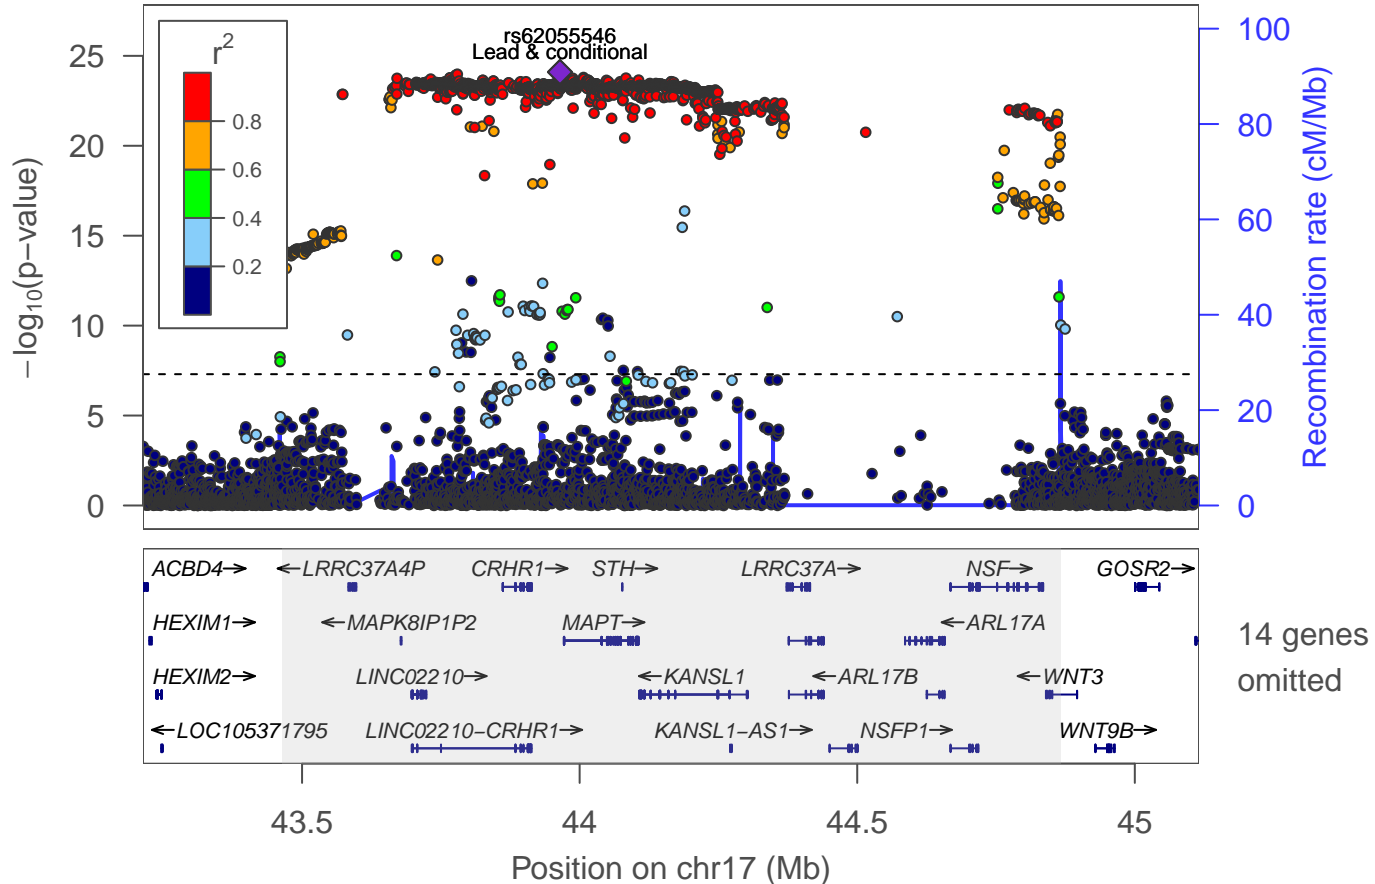

# Drinks per week: locus 55 [chr 17:79.409–79.427Mb]

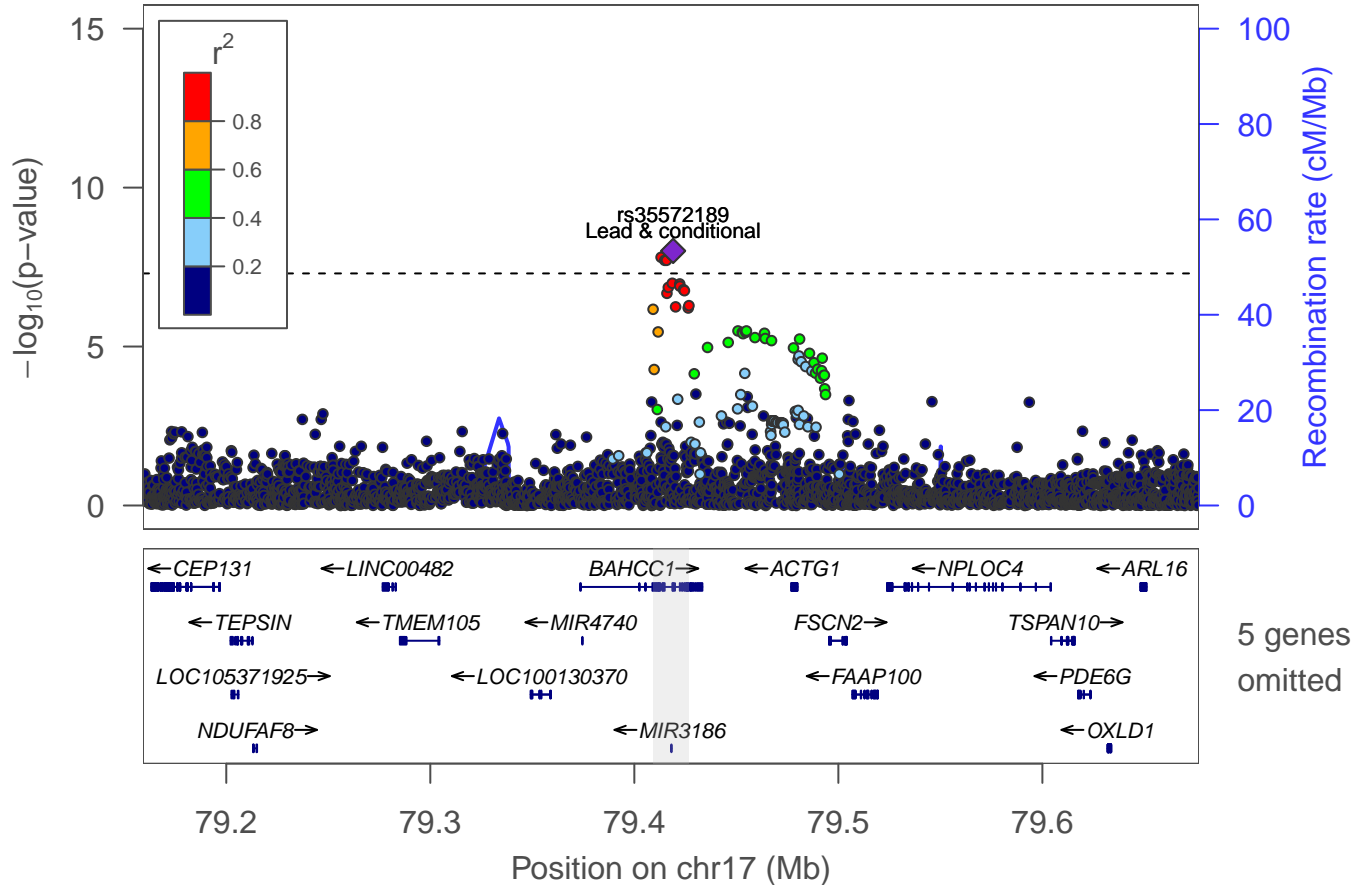

# Drinks per week: locus 56 [chr 18:21.074–21.165Mb]

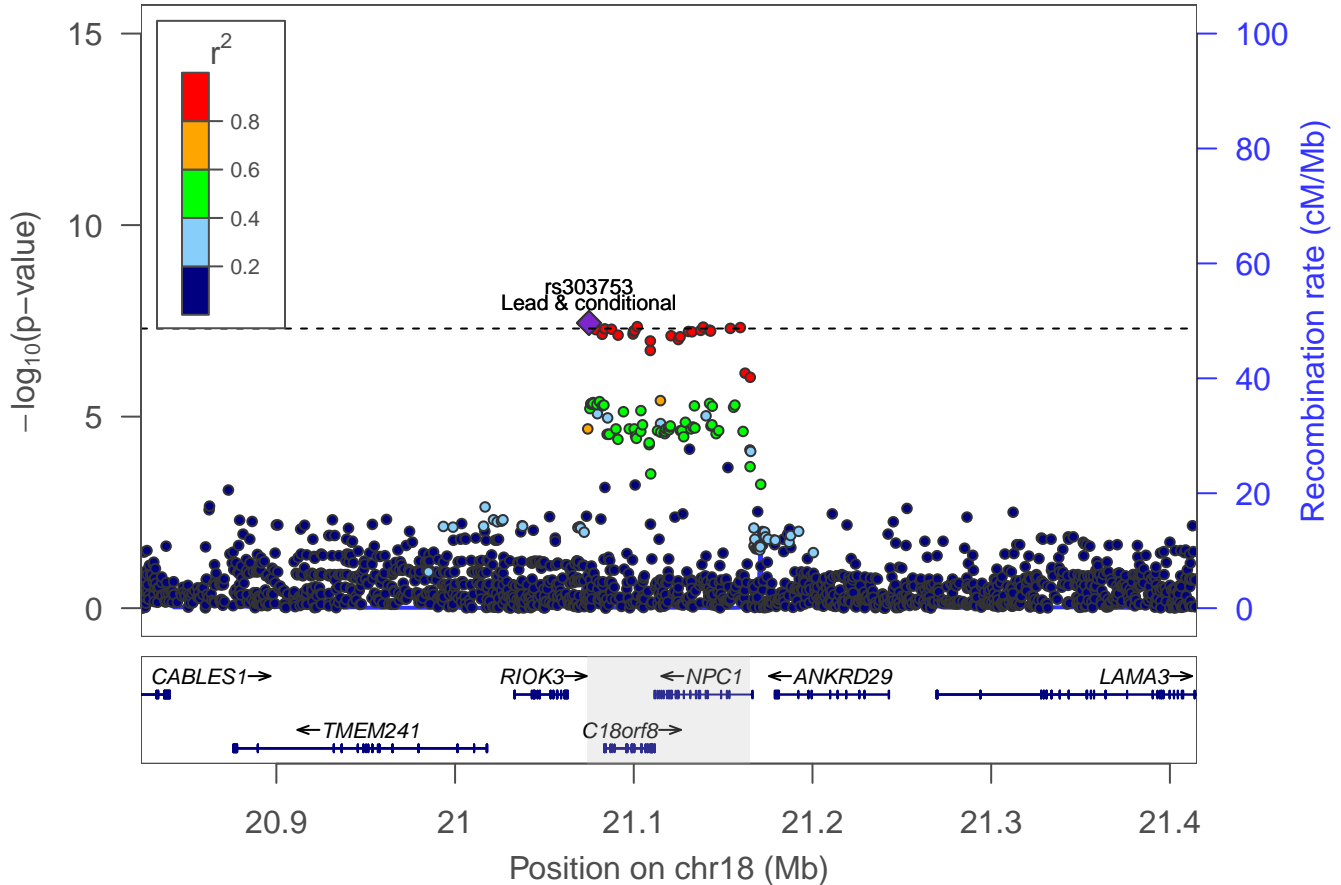

# Drinks per week: locus 57 [chr 18:52.943–53.085Mb]

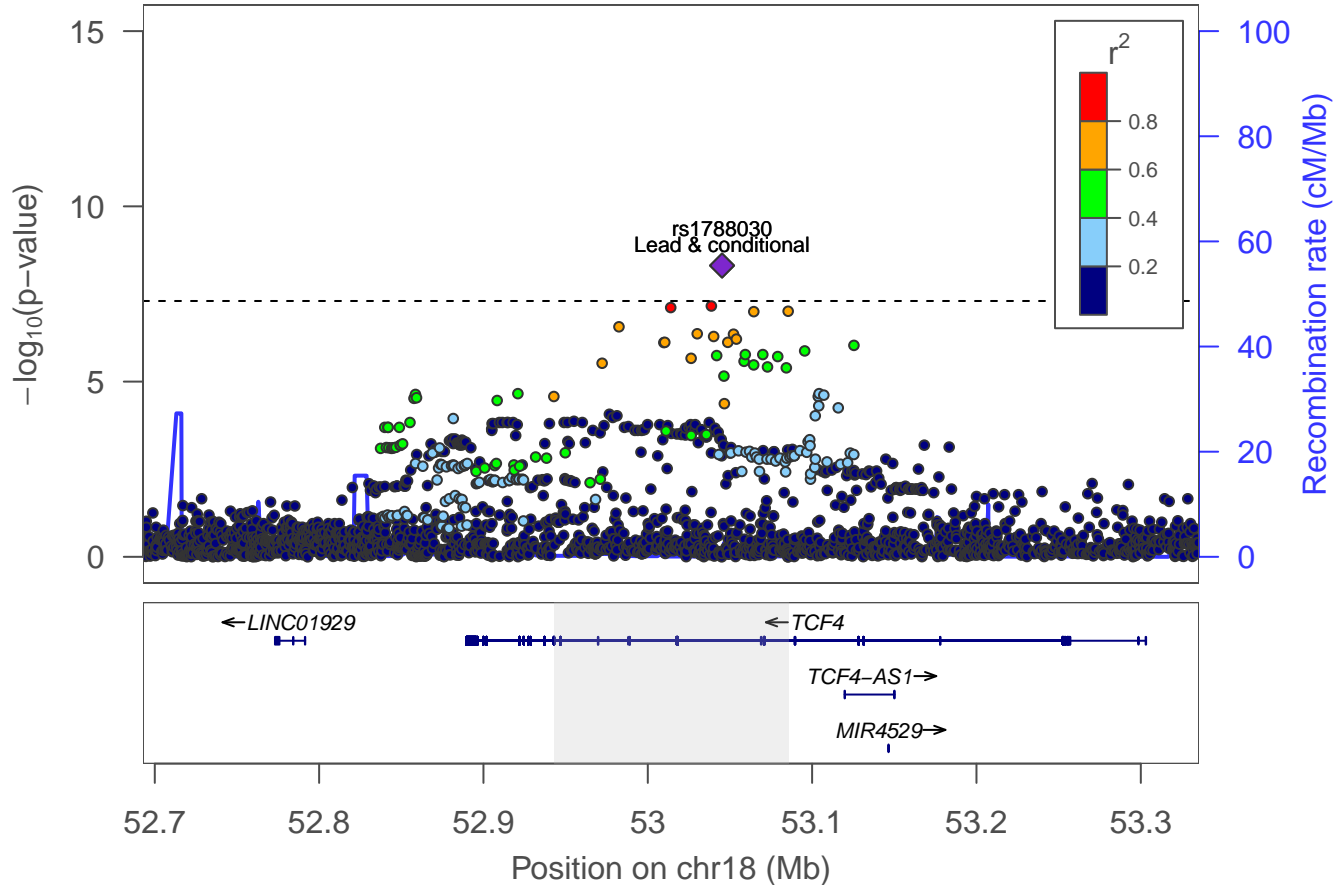

# Drinks per week: locus 58 [chr 19:42.500–42.736Mb]

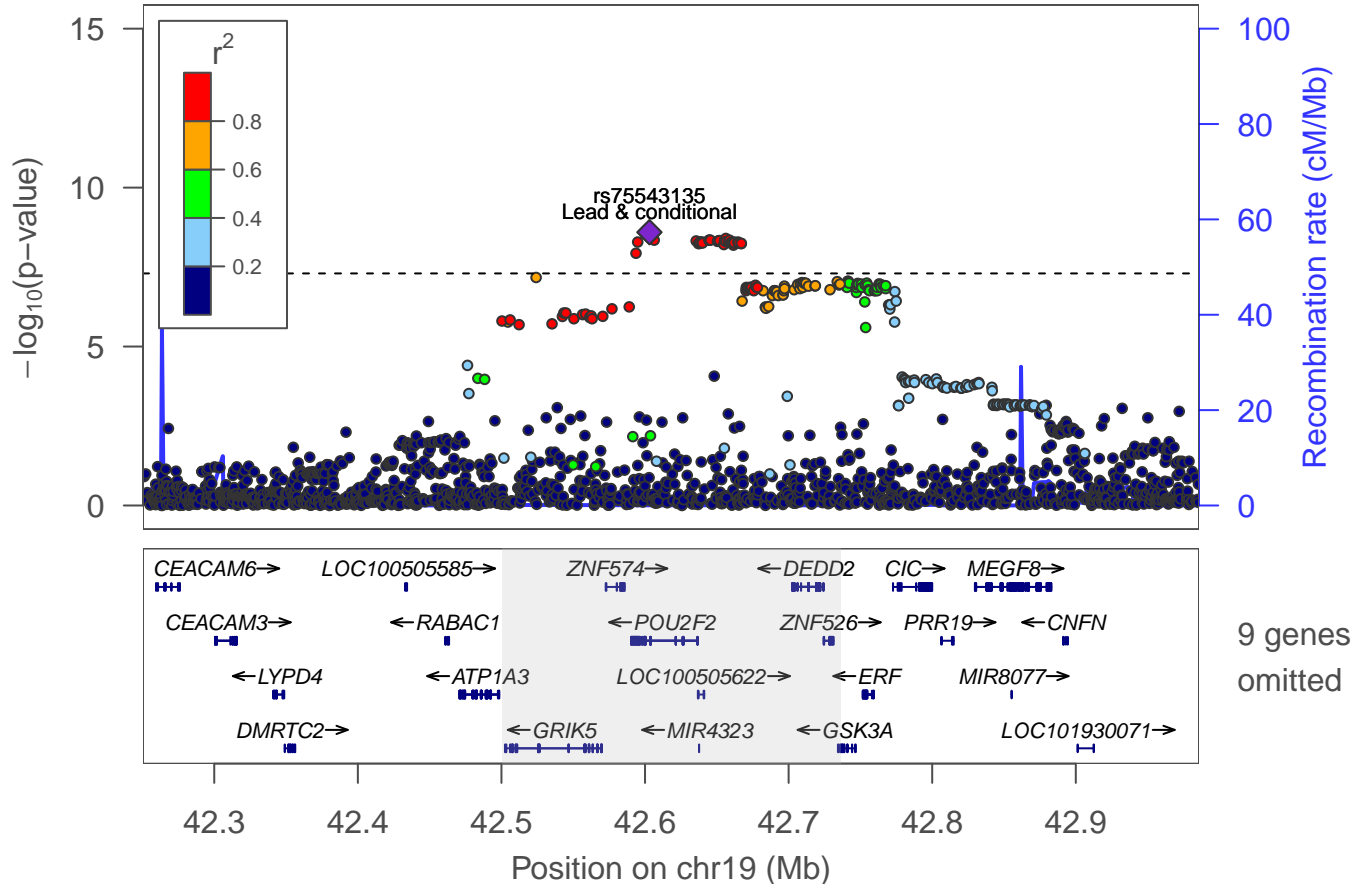



# Drinks per week: locus 59 [chr 19:49.206–49.260Mb]

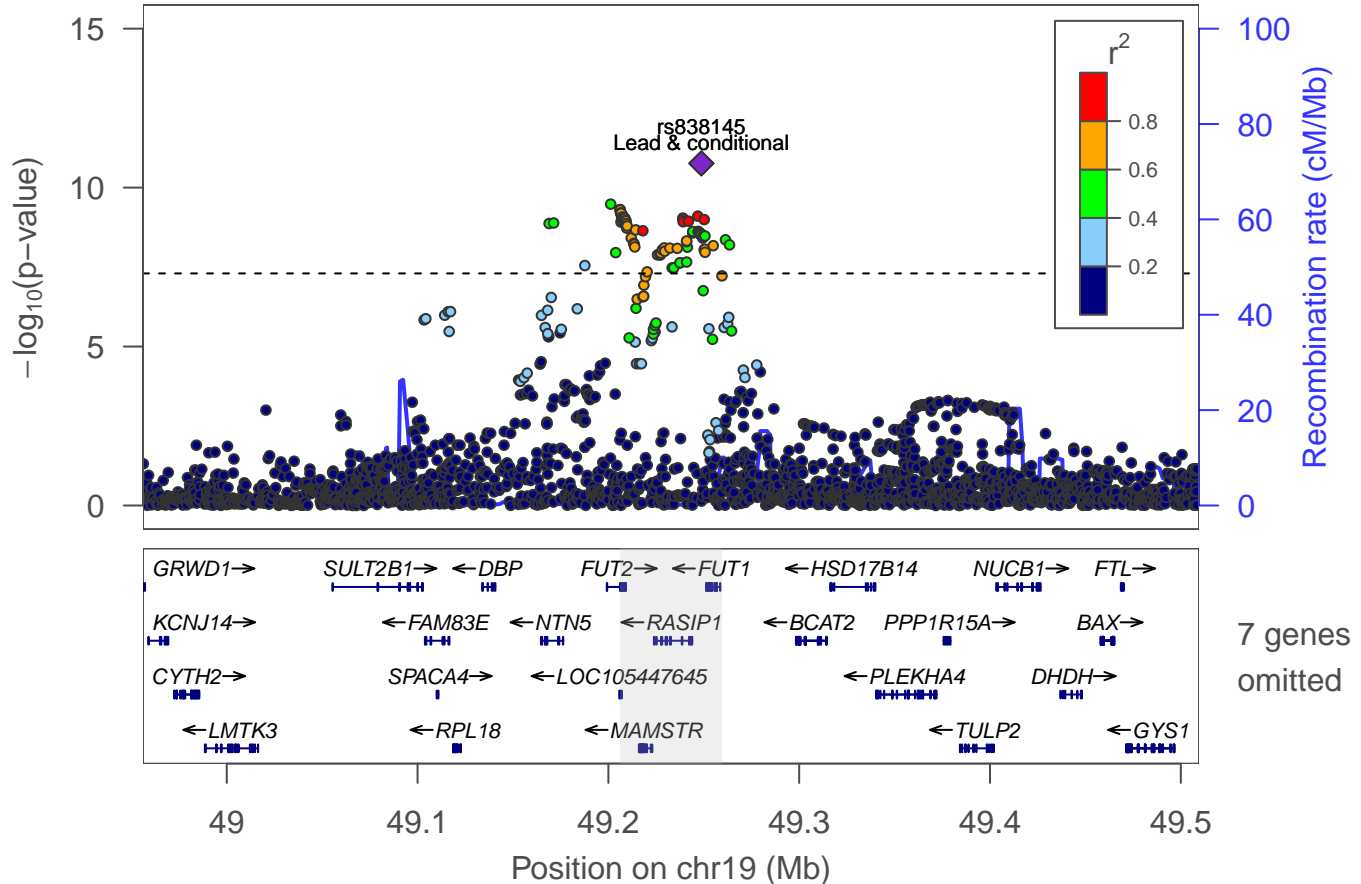

# Drinks per week: Locus 60 [chr 20: 24.719–25.095Mb]

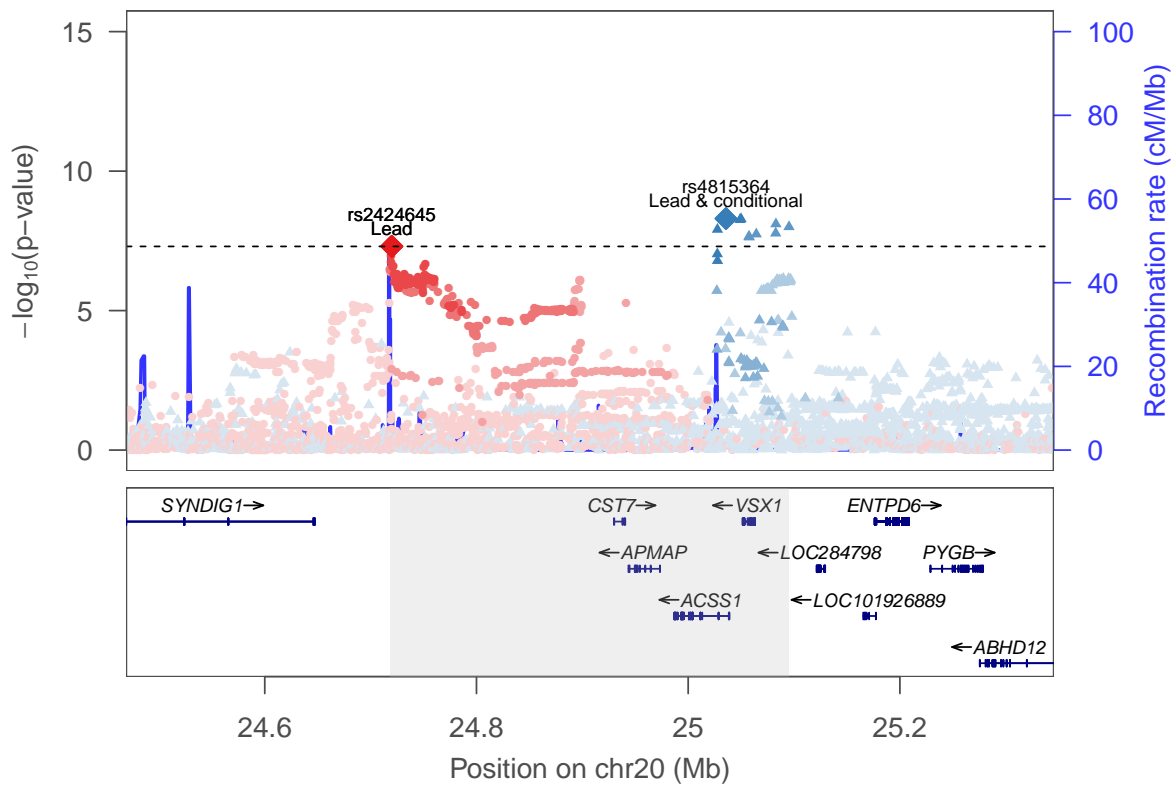

rs4815364 ▲  
rs2424645 ●

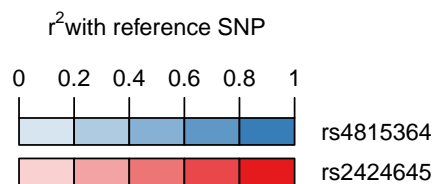

# Drinks per week: locus 61 [chr 22:41.719–42.216Mb]

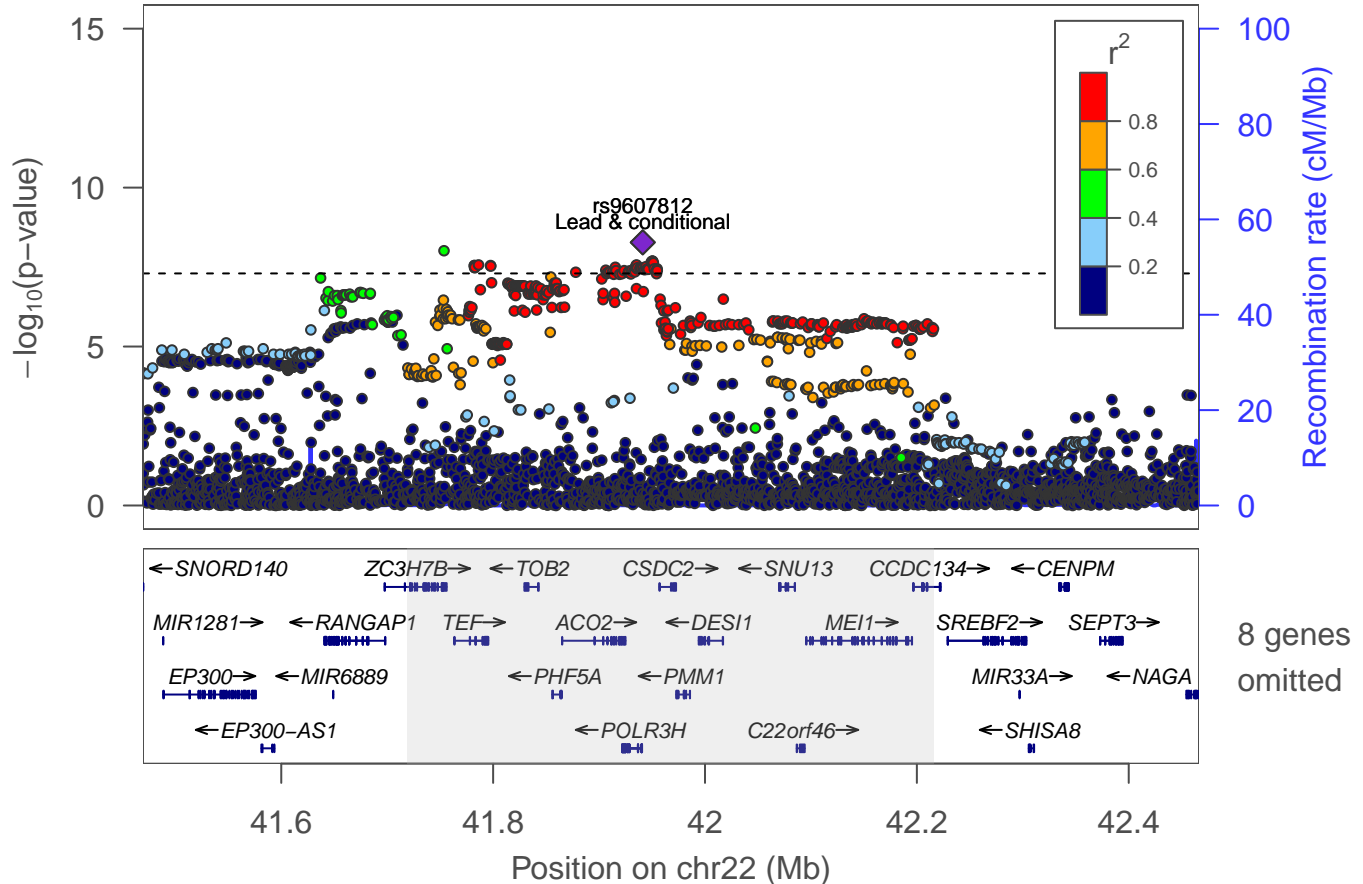

# Drinks per week: locus 62 [chr 22:46.481–46.482Mb]

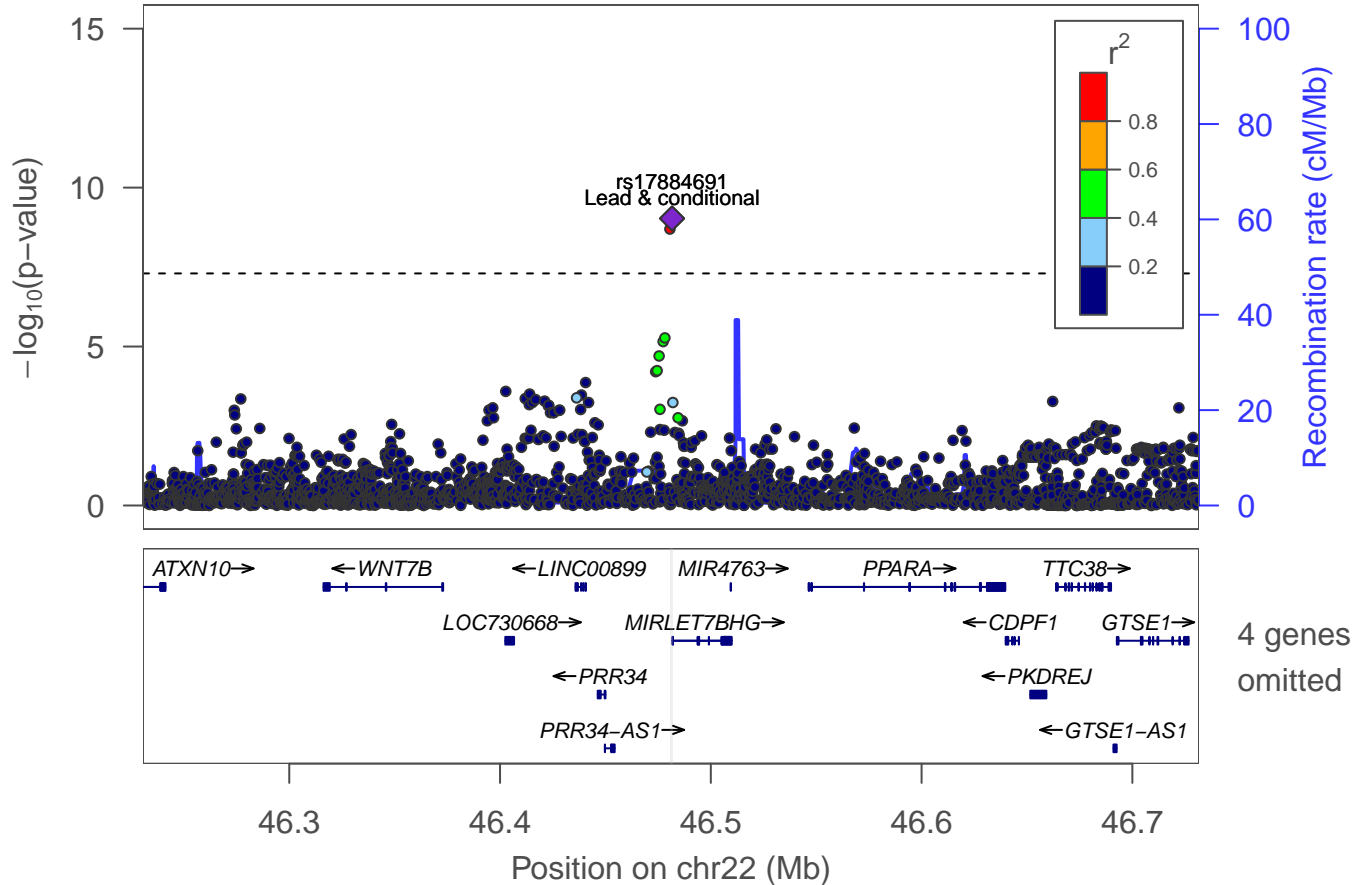

LocusZoom plots for the 183 loci identified  
in the GWAS of ever smoker

---

# Ever smoker: locus 1 [chr 1:8.432–8.739Mb]

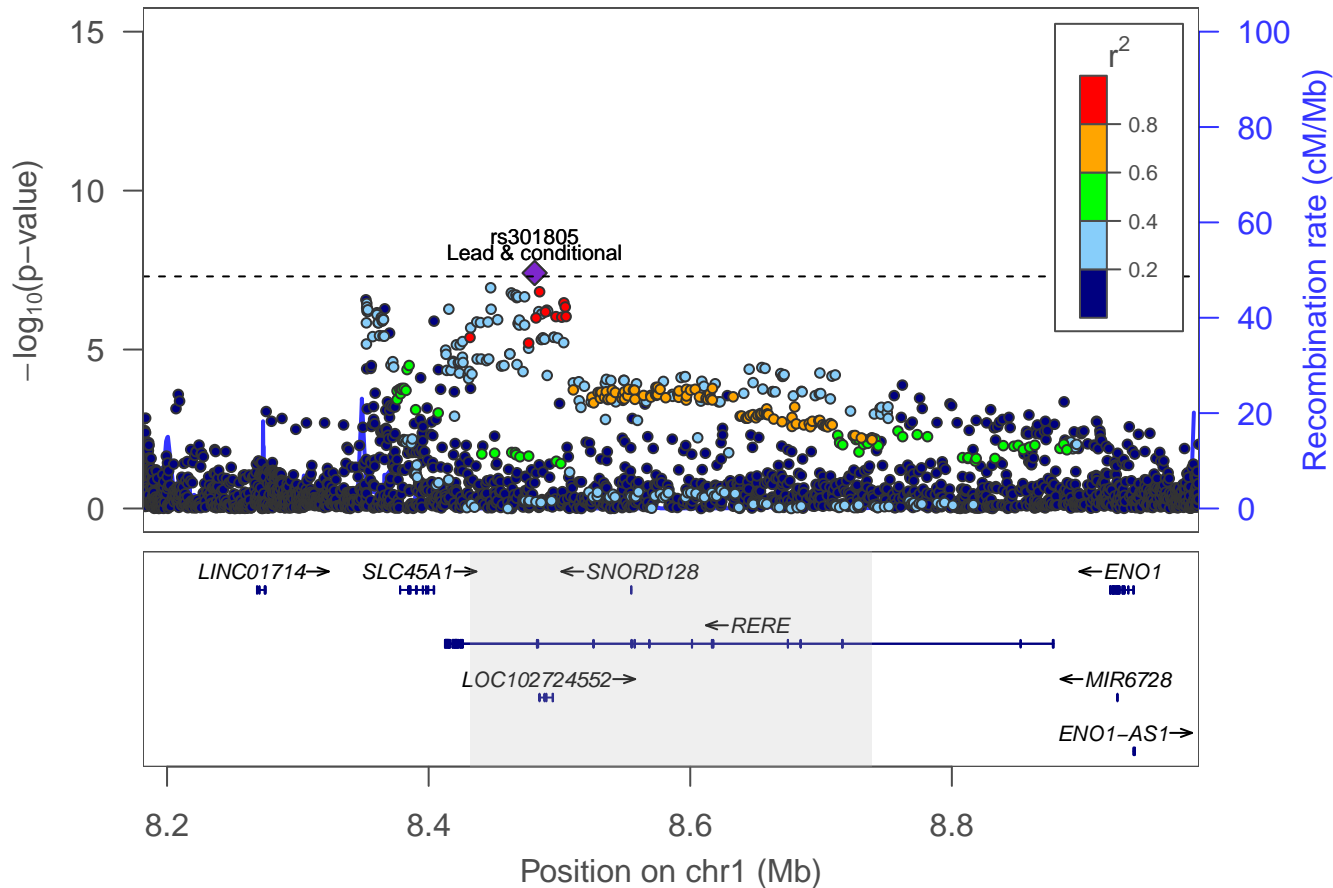

# Ever smoker: locus 2 [chr 1:32.163–32.248Mb]

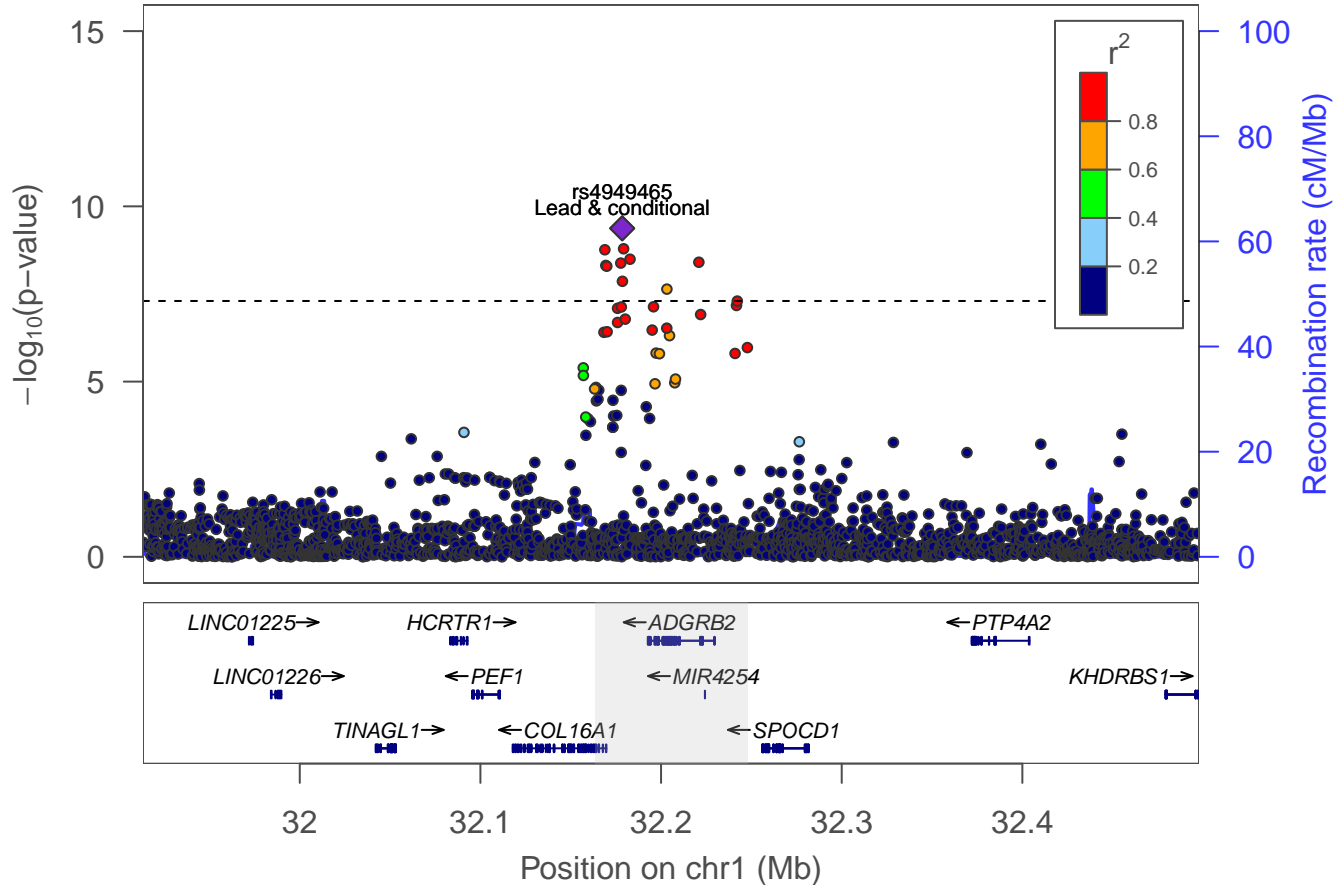

# Ever smoker: locus 3 [chr 1:33.776–33.916Mb]

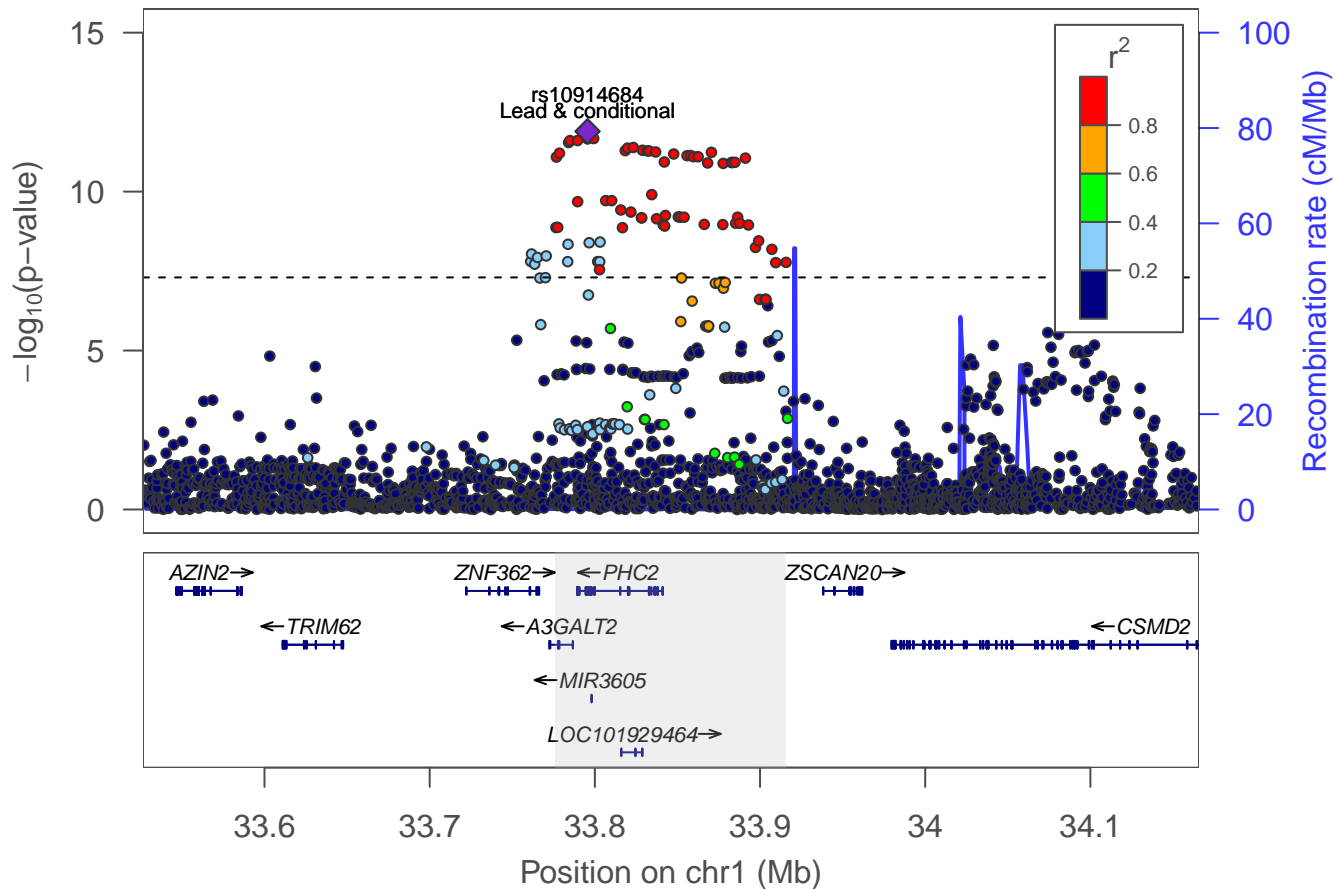



# Ever smoker: locus 4 [chr 1:41.752–41.819Mb]

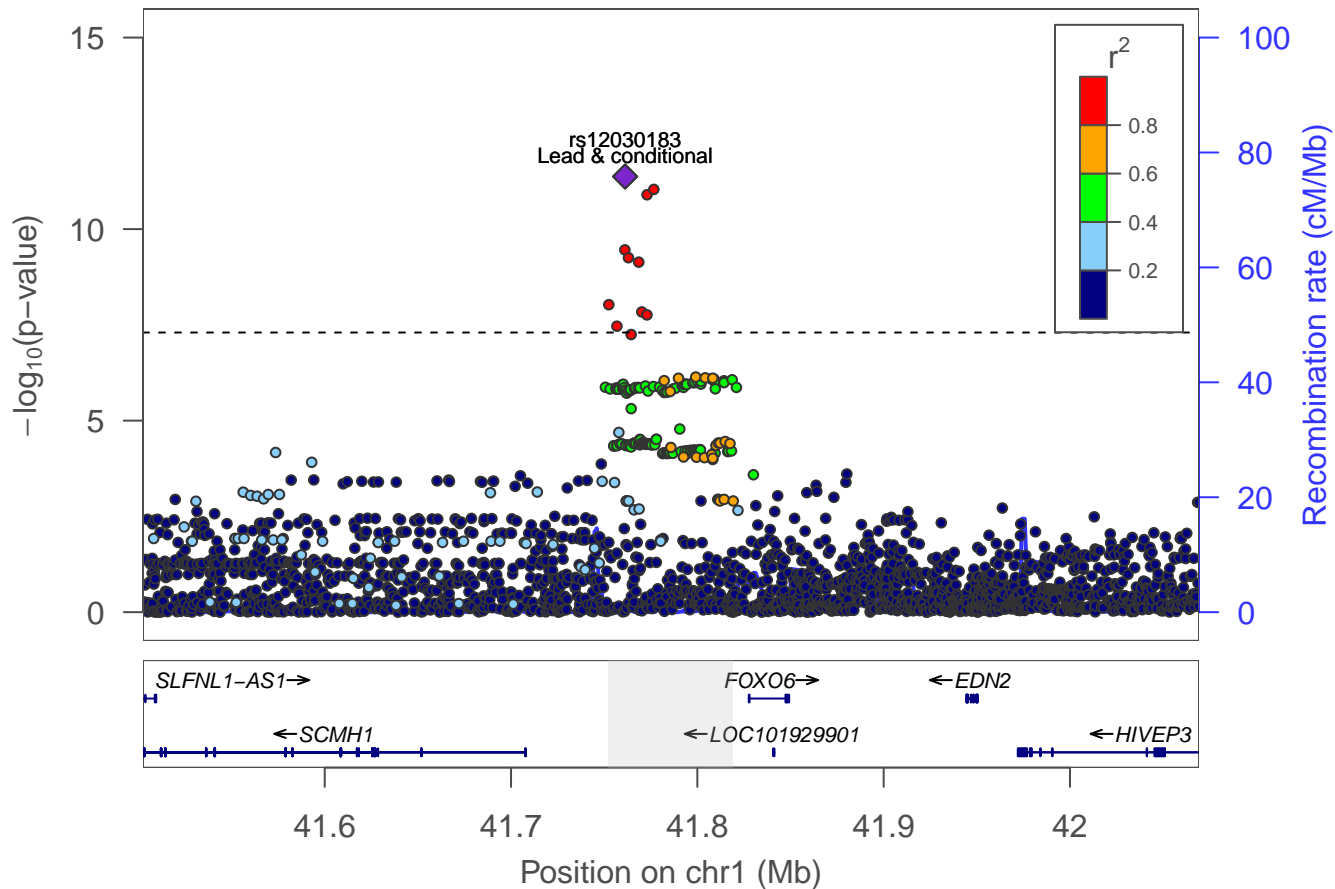

# Ever smoker: locus 5 [chr 1:44.029–44.128Mb]

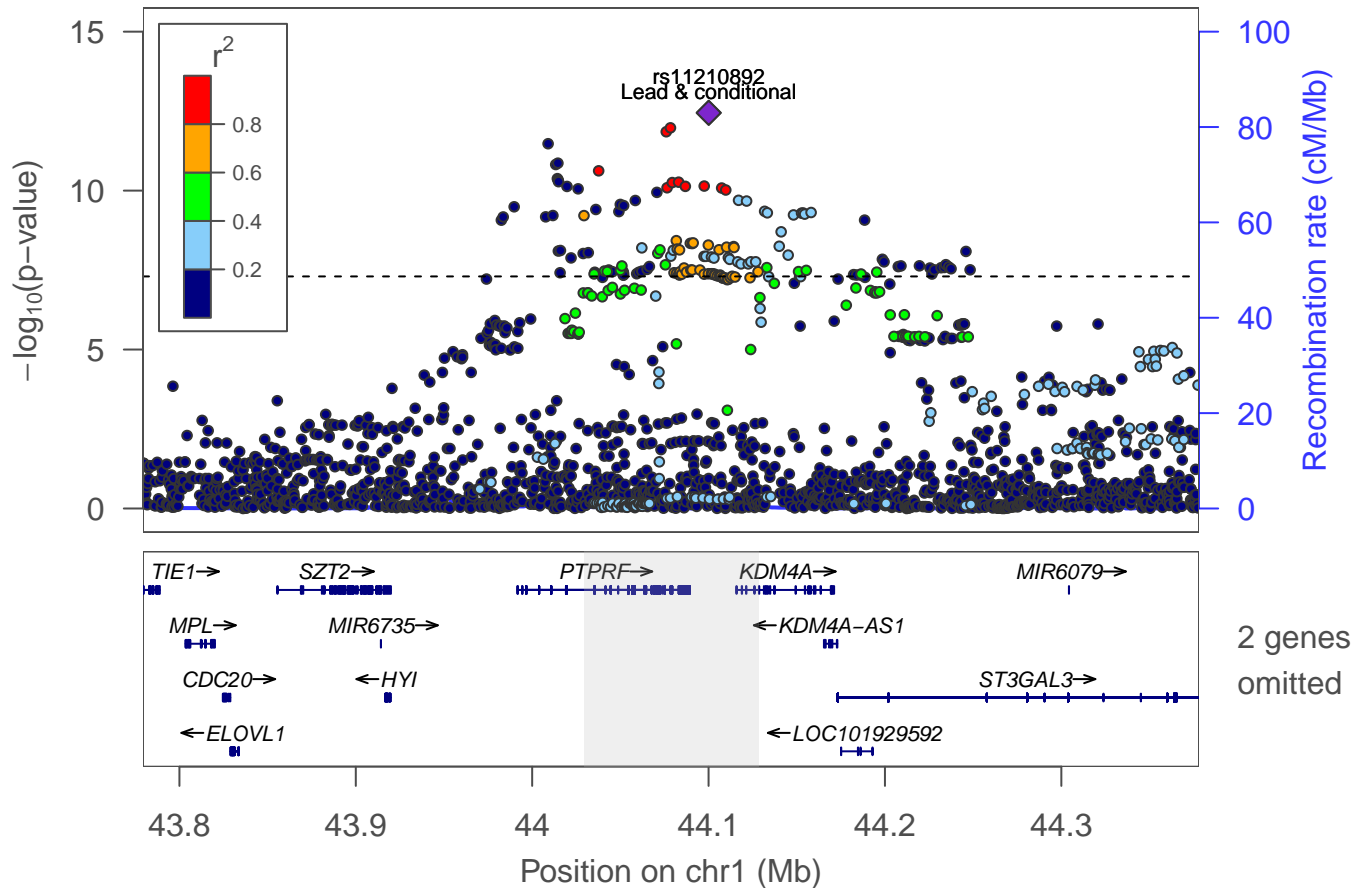

# Ever smoker: locus 6 [chr 1:50.595–50.637Mb]

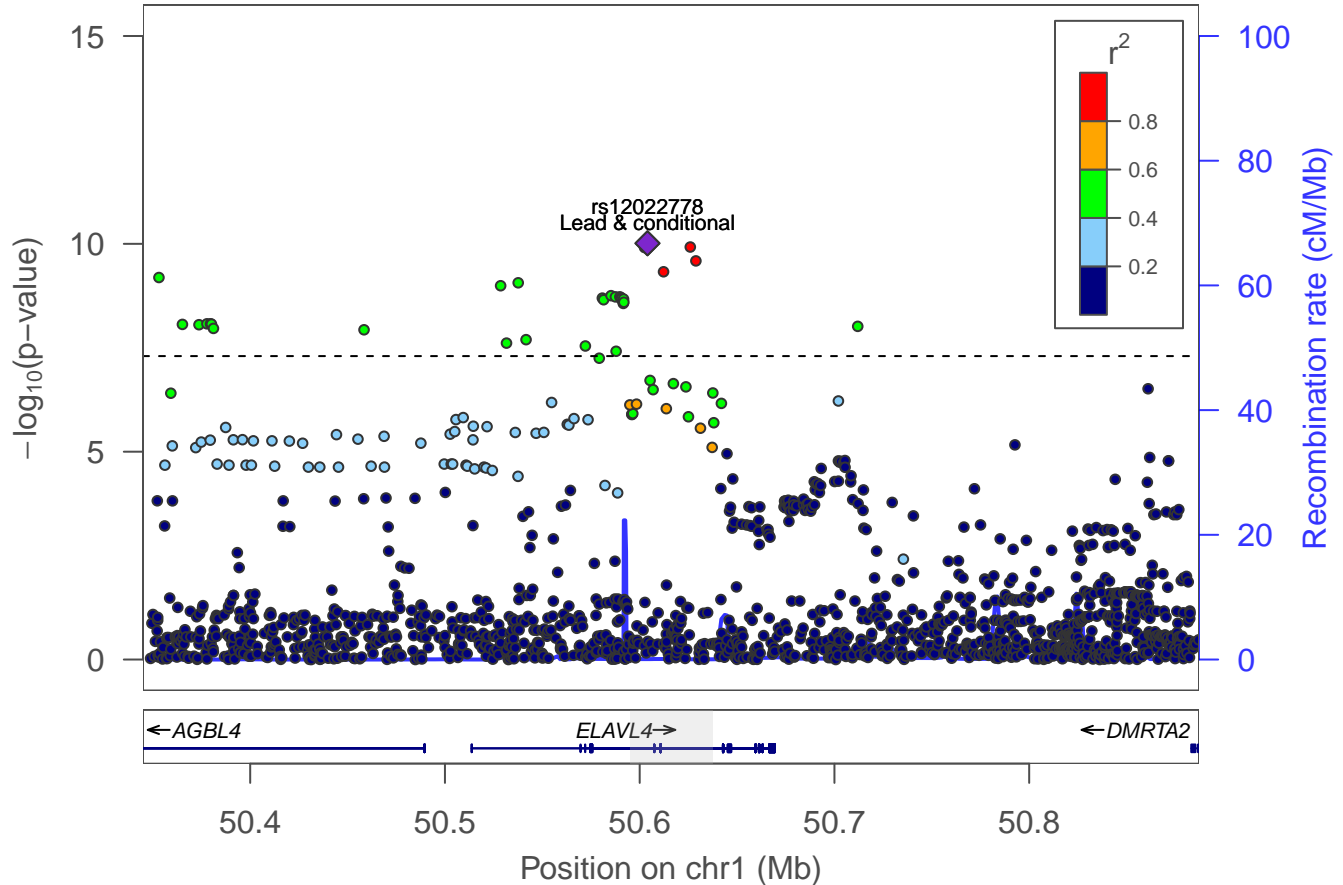

# Ever smoker: locus 7 [chr 1:66.389–66.538Mb]

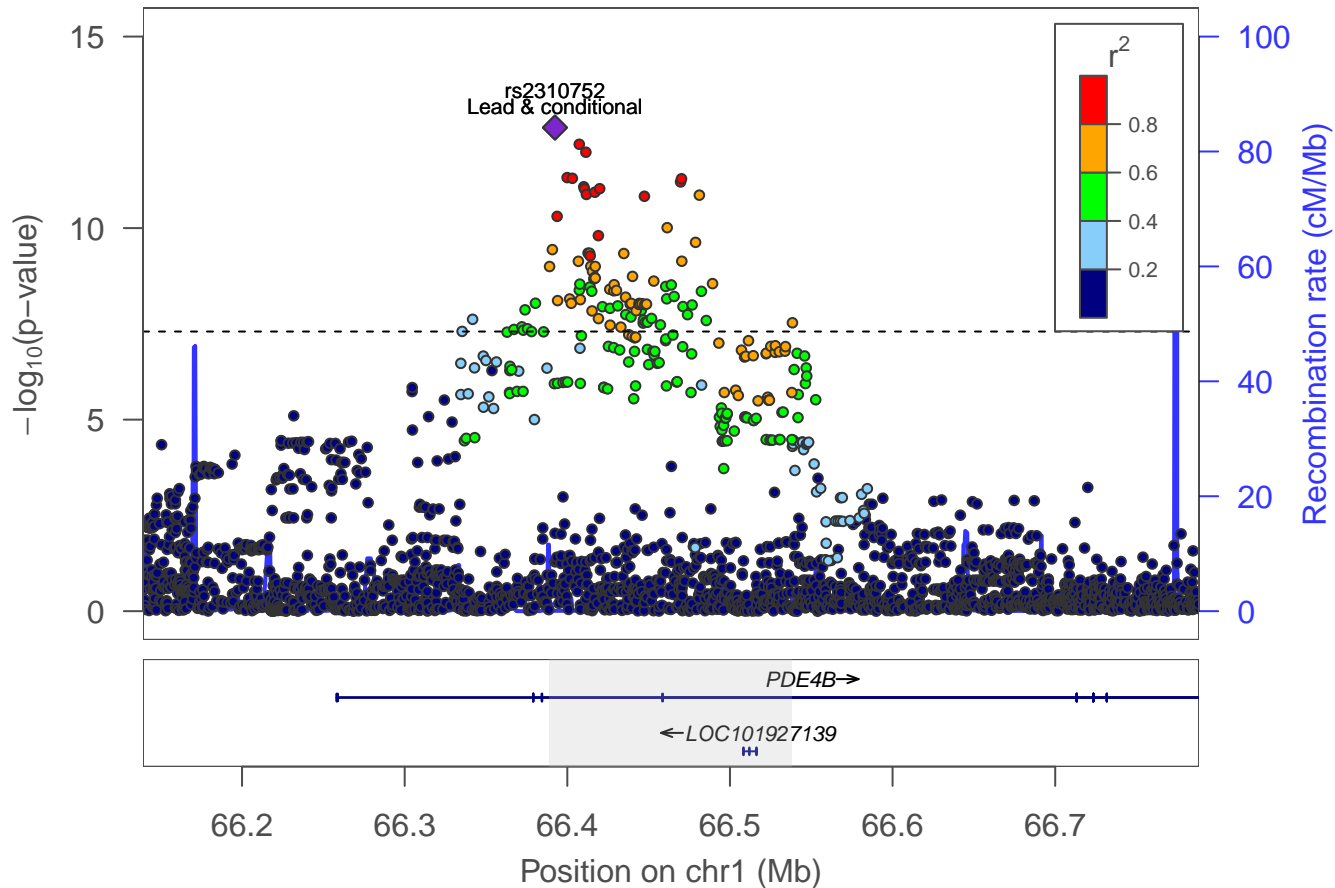

# Ever smoker: Locus 8 [chr 1: 72.961–73.066Mb]

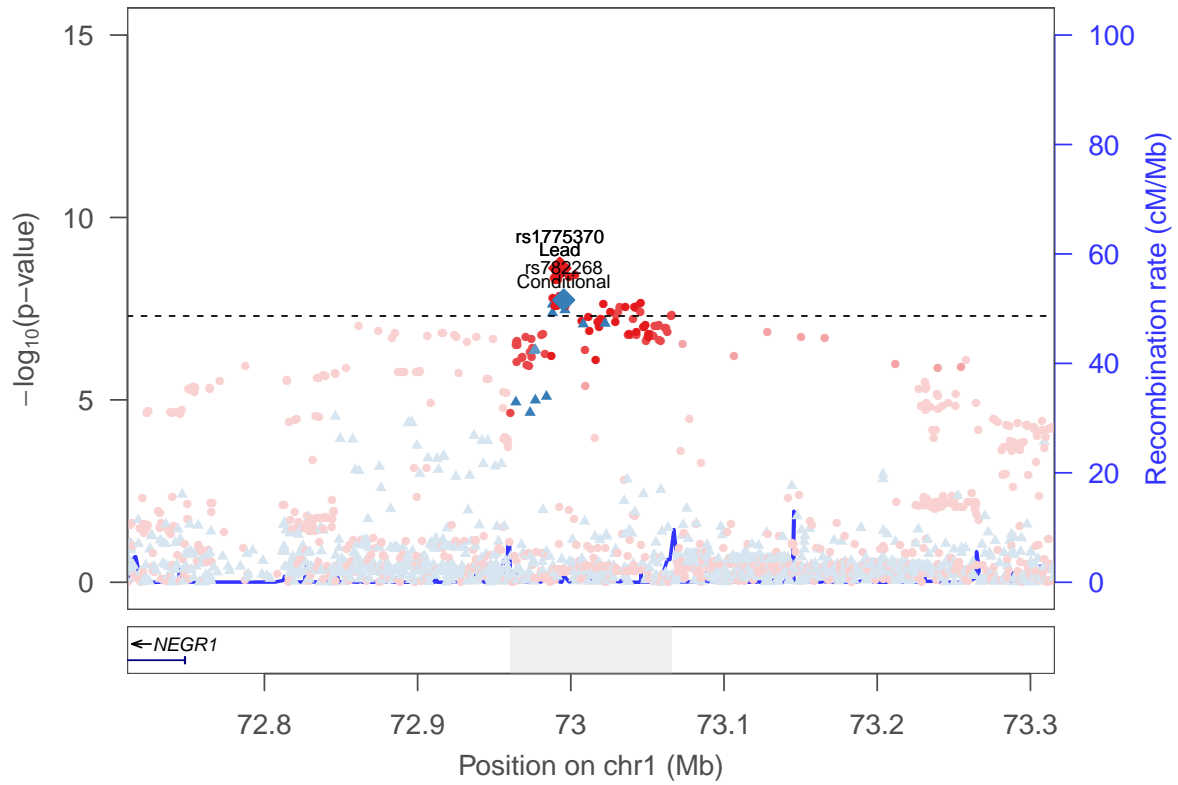

rs782268 ▲  
rs1775370 ●

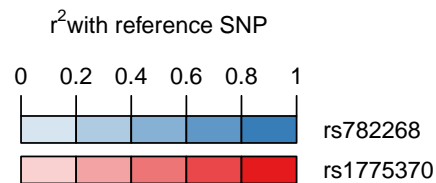

# Ever smoker: locus 9 [chr 1:73.731–73.992Mb]

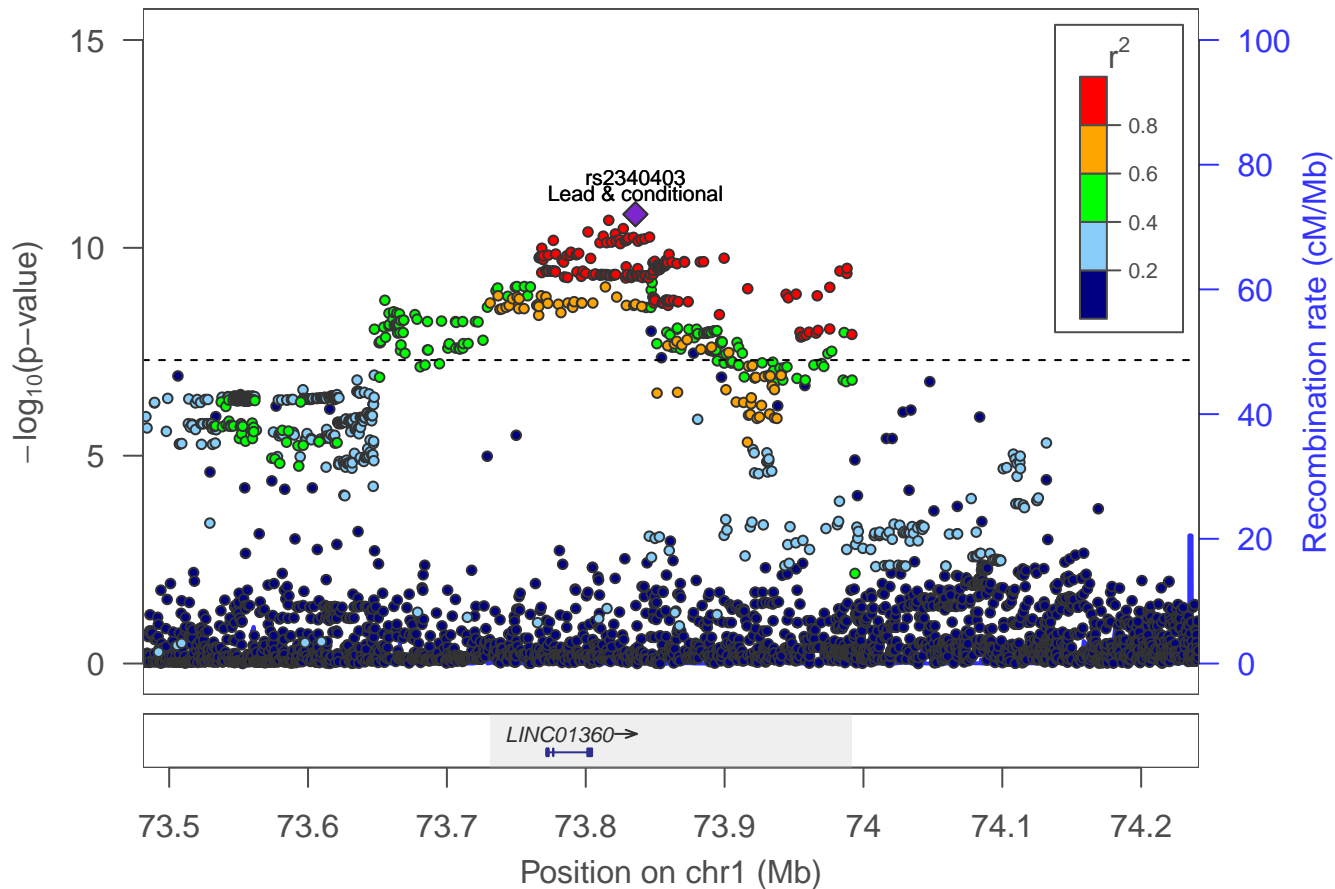

# Ever smoker: locus 10 [chr 1:74.977–75.015Mb]

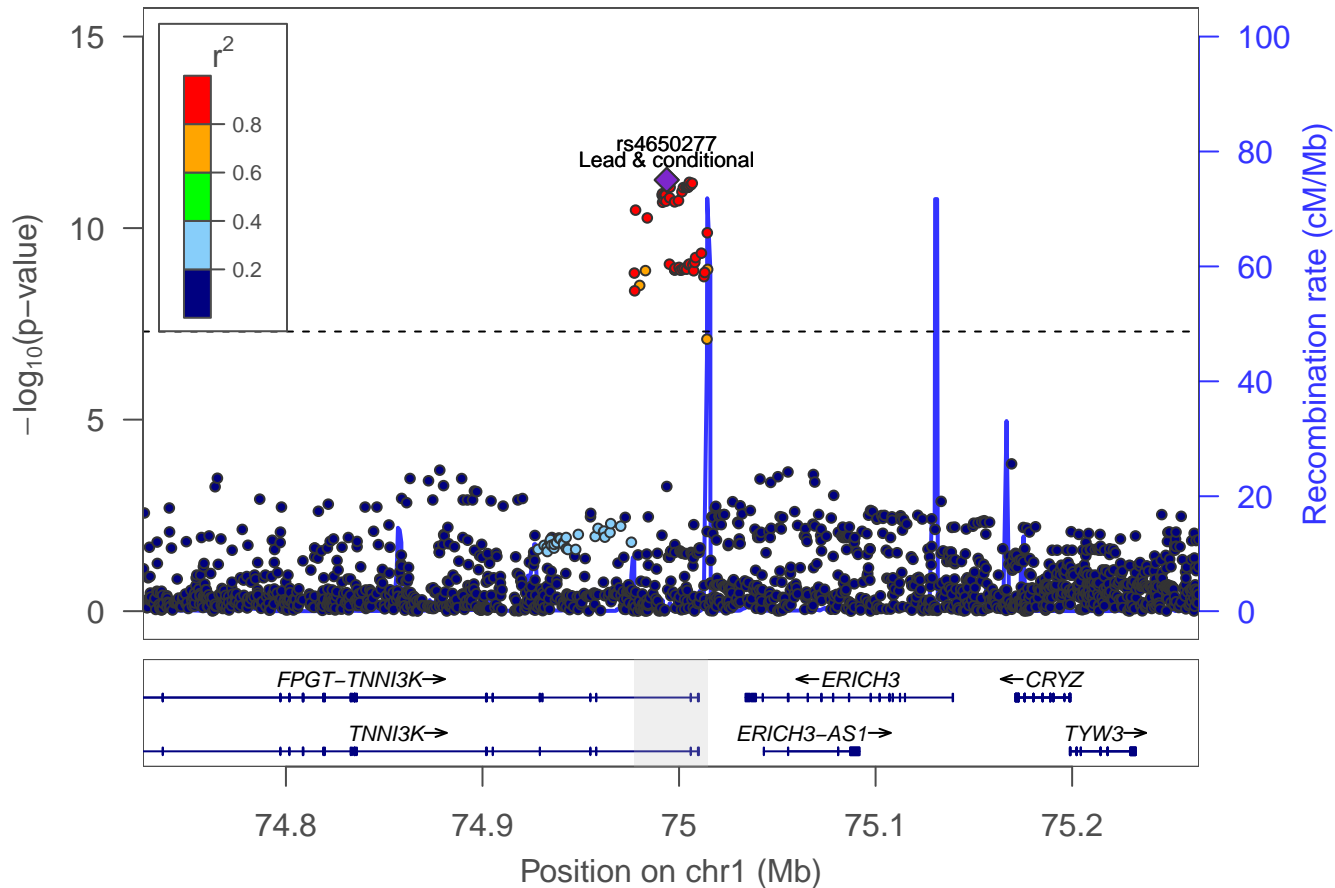

# Ever smoker: locus 11 [chr 1:91.190–91.215Mb]

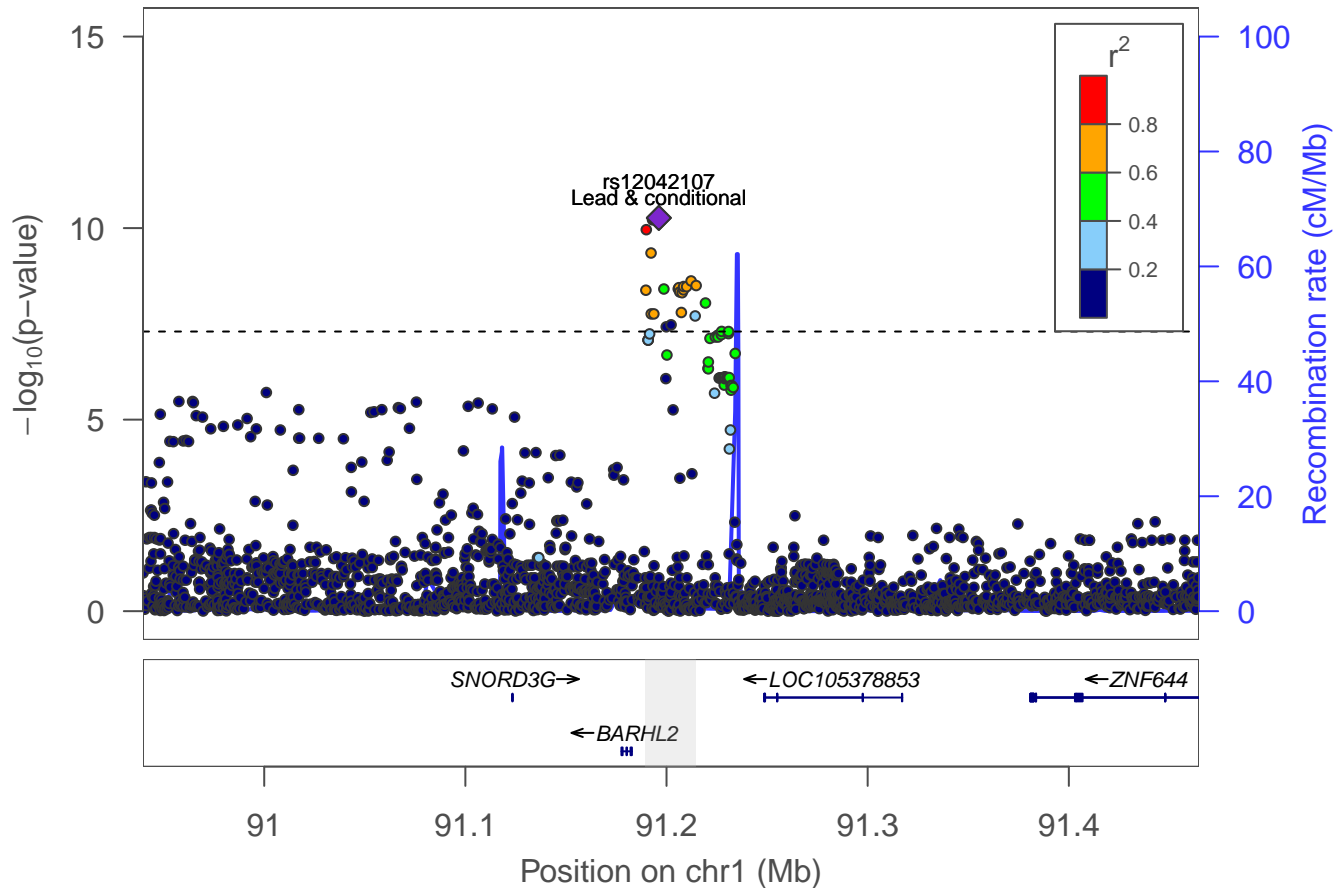



# Ever smoker: locus 12 [chr 1:96.357–96.450Mb]

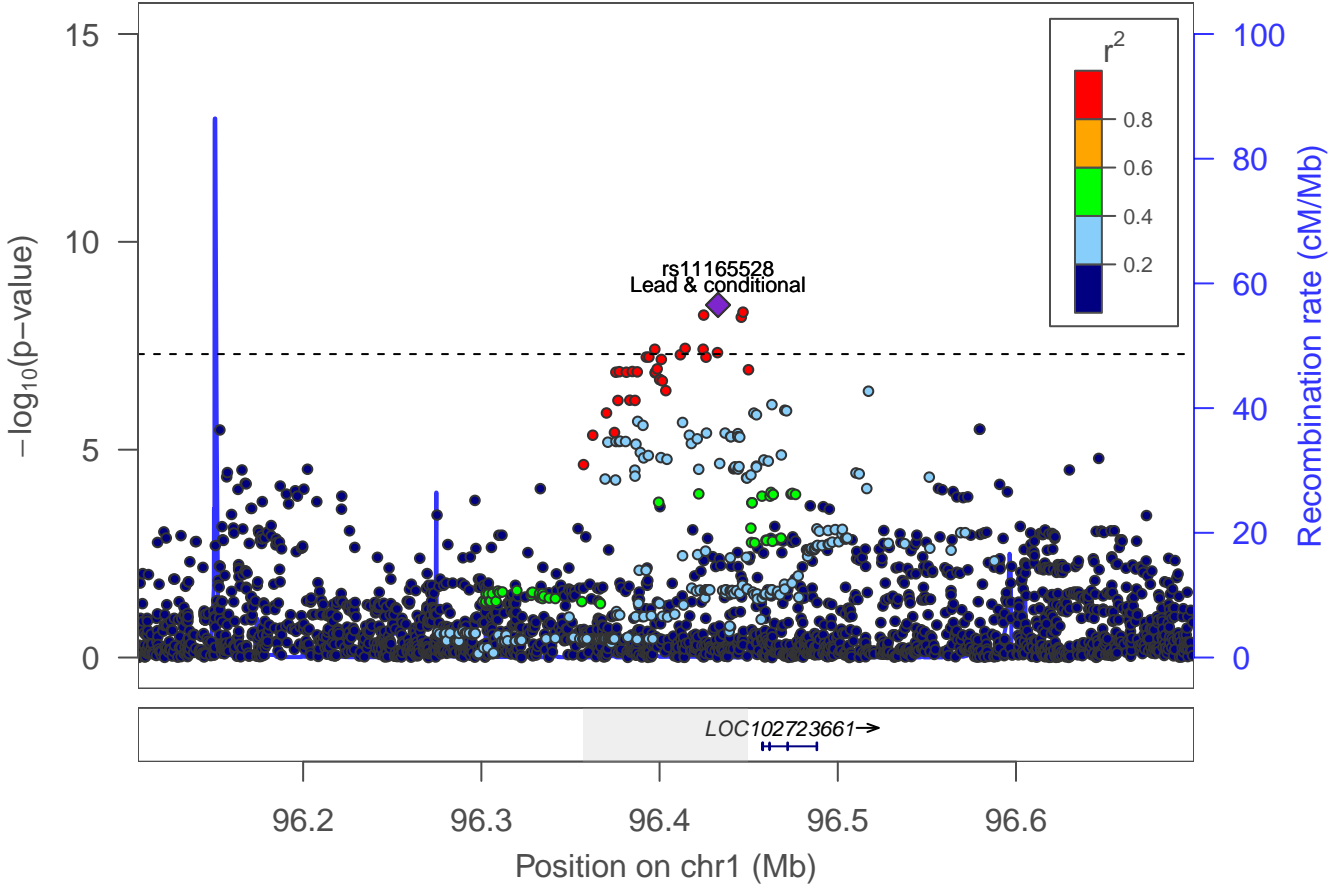

# Ever smoker: locus 13 [chr 1:96.887–97.003Mb]

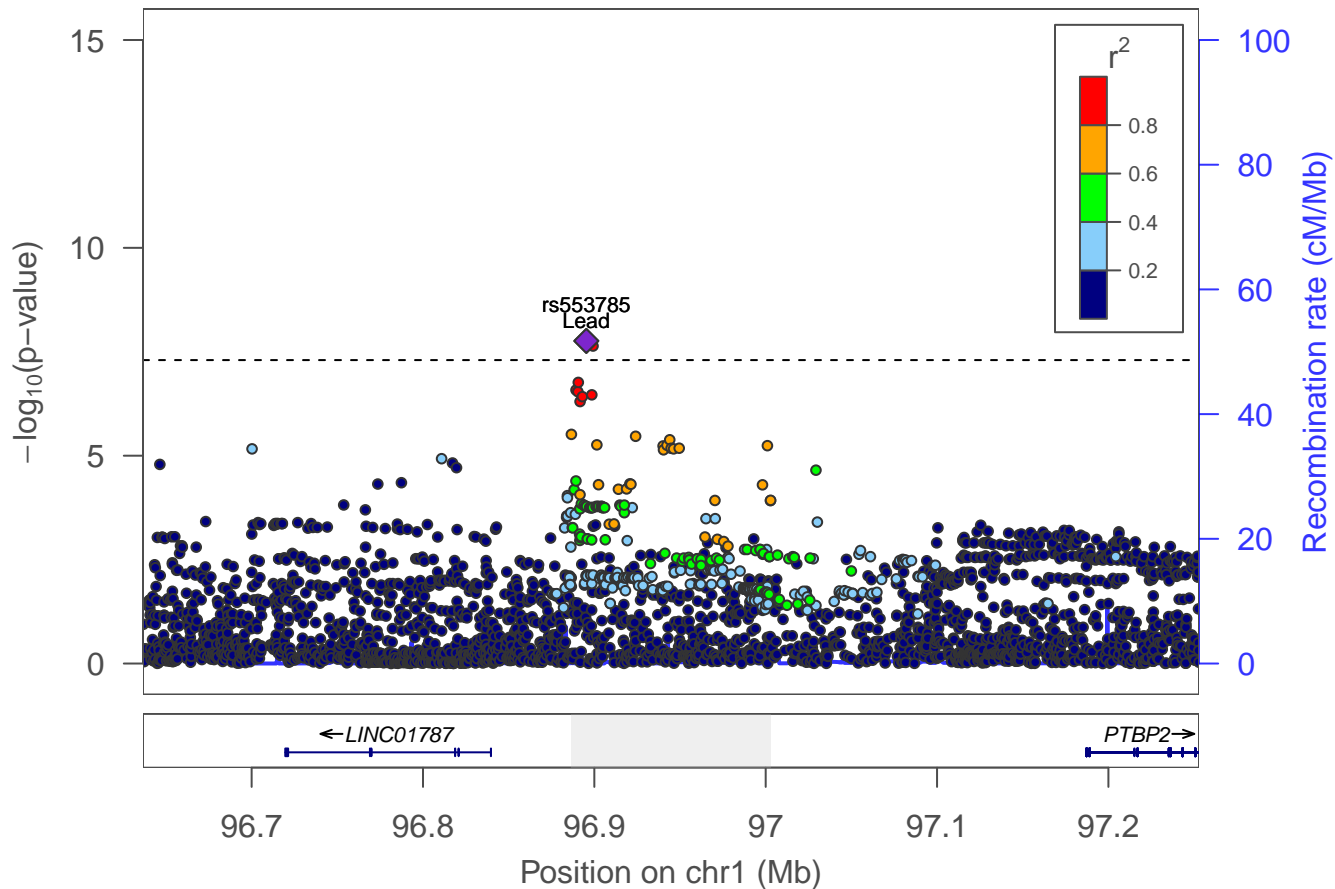

# Ever smoker: locus 14 [chr 1:99.425–99.530Mb]

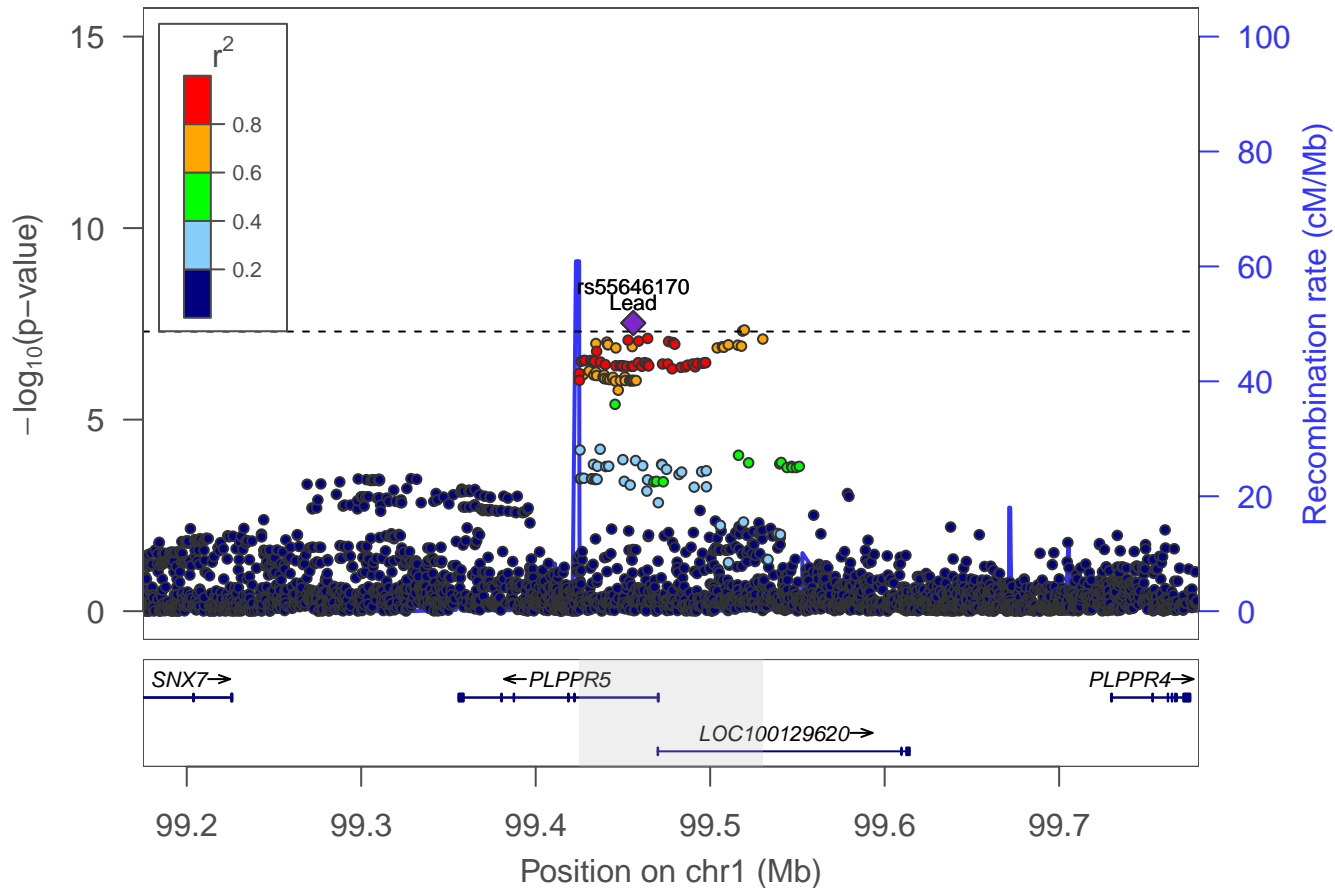

# Ever smoker: locus 15 [chr 1:153.993–154.269Mb]

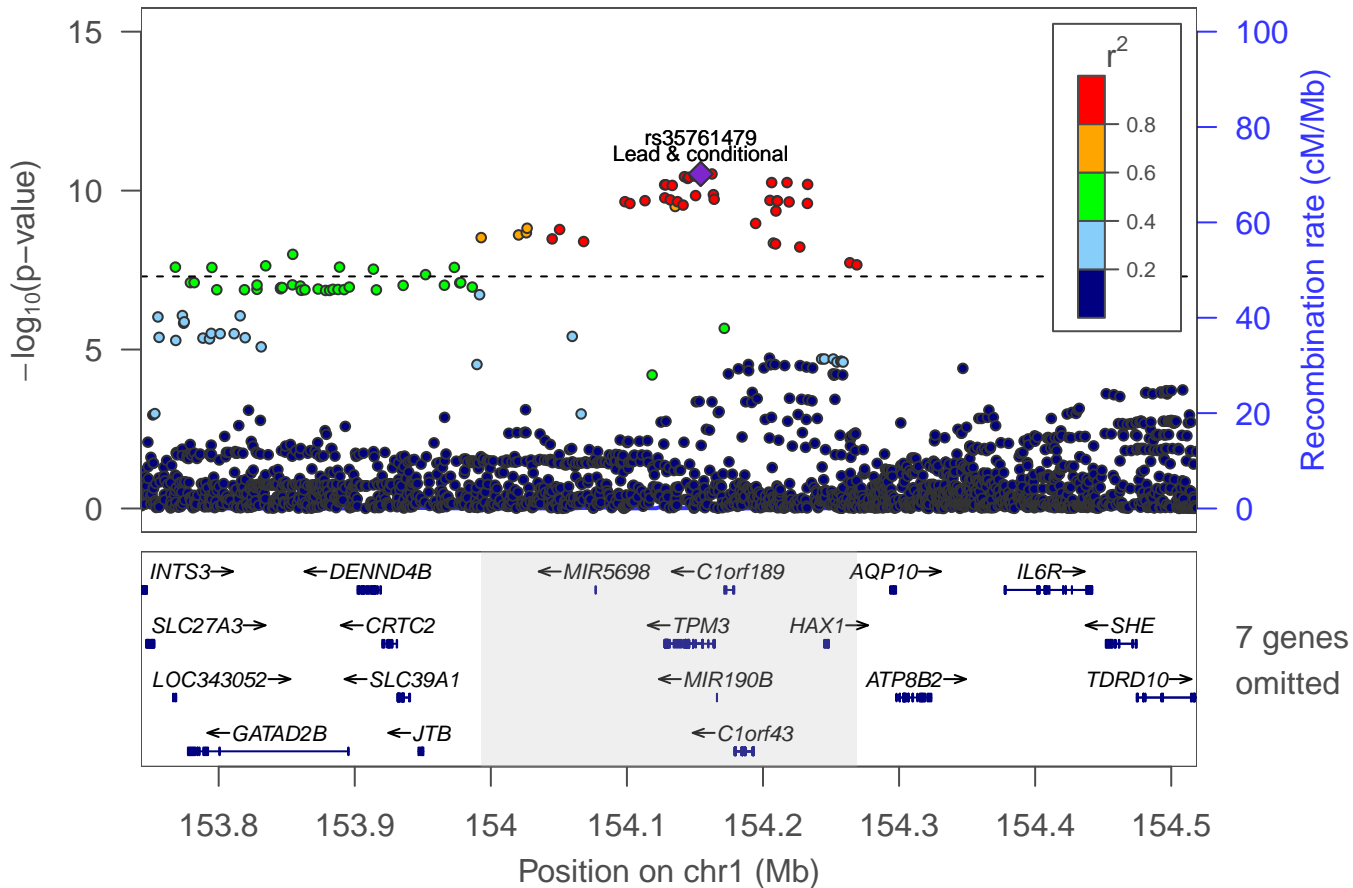

# Ever smoker: locus 16 [chr 1:208.709–208.730Mb]

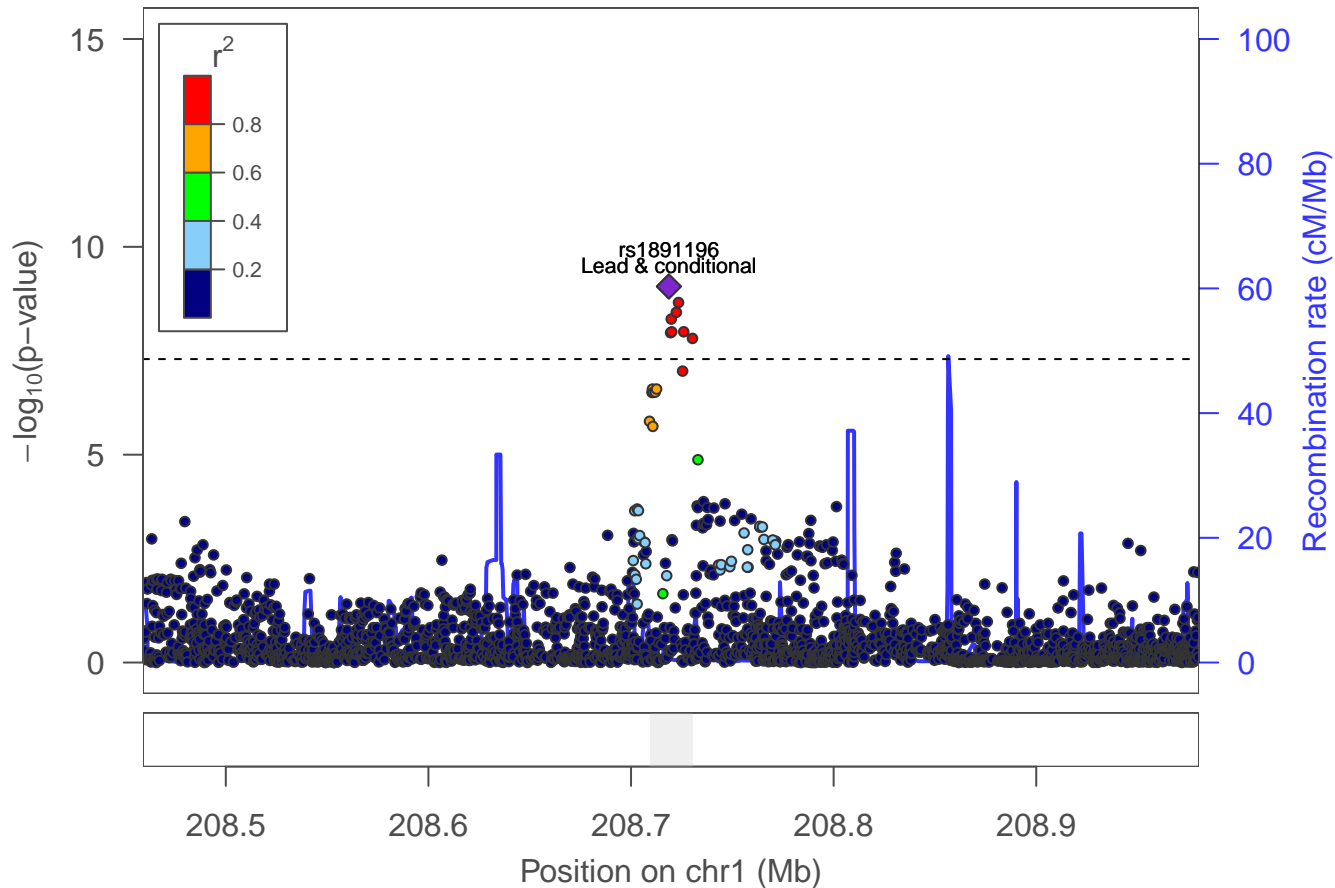

# Ever smoker: locus 17 [chr 1:210.176–210.423Mb]

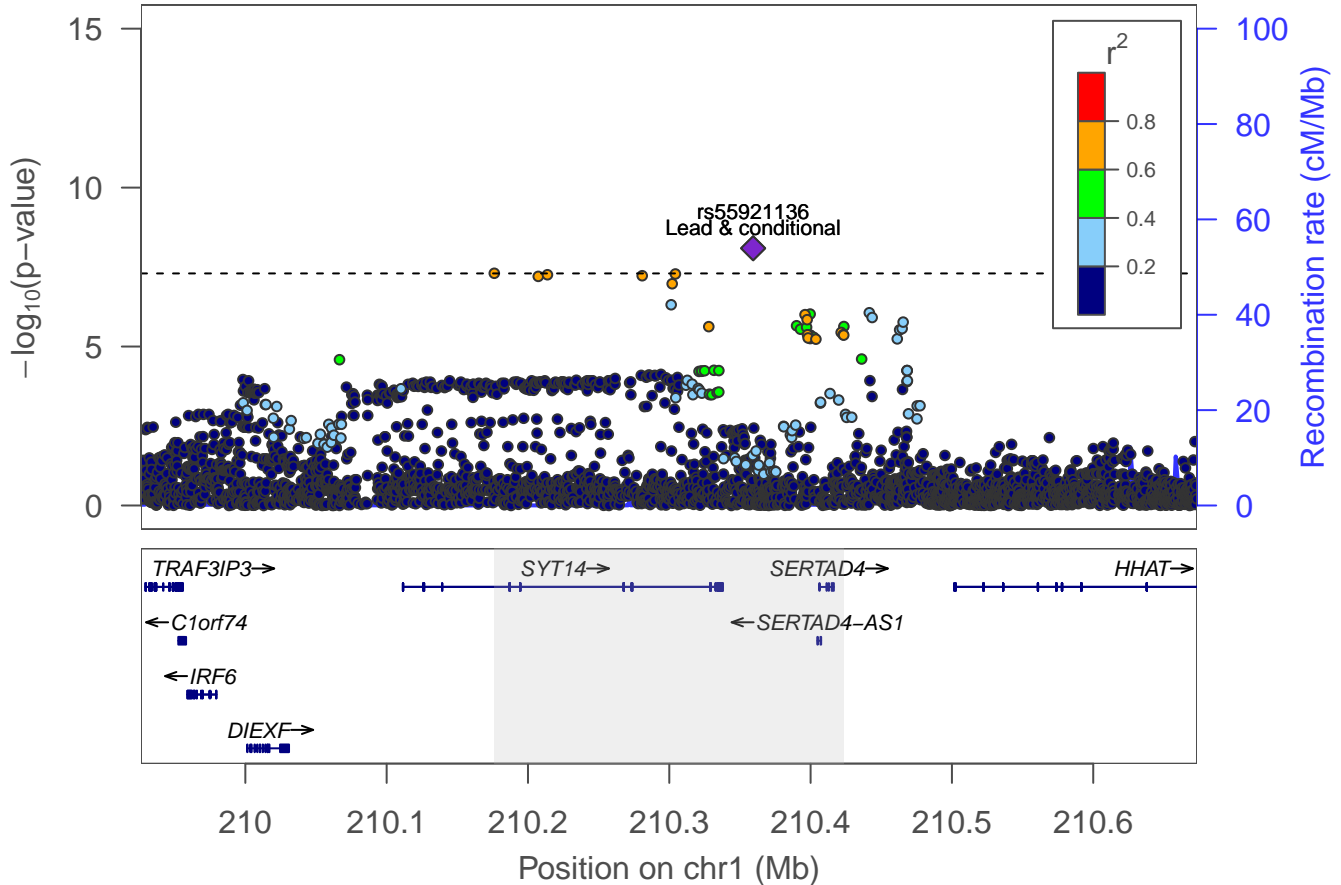

# Ever smoker: locus 18 [chr 1:216.859–216.923Mb]

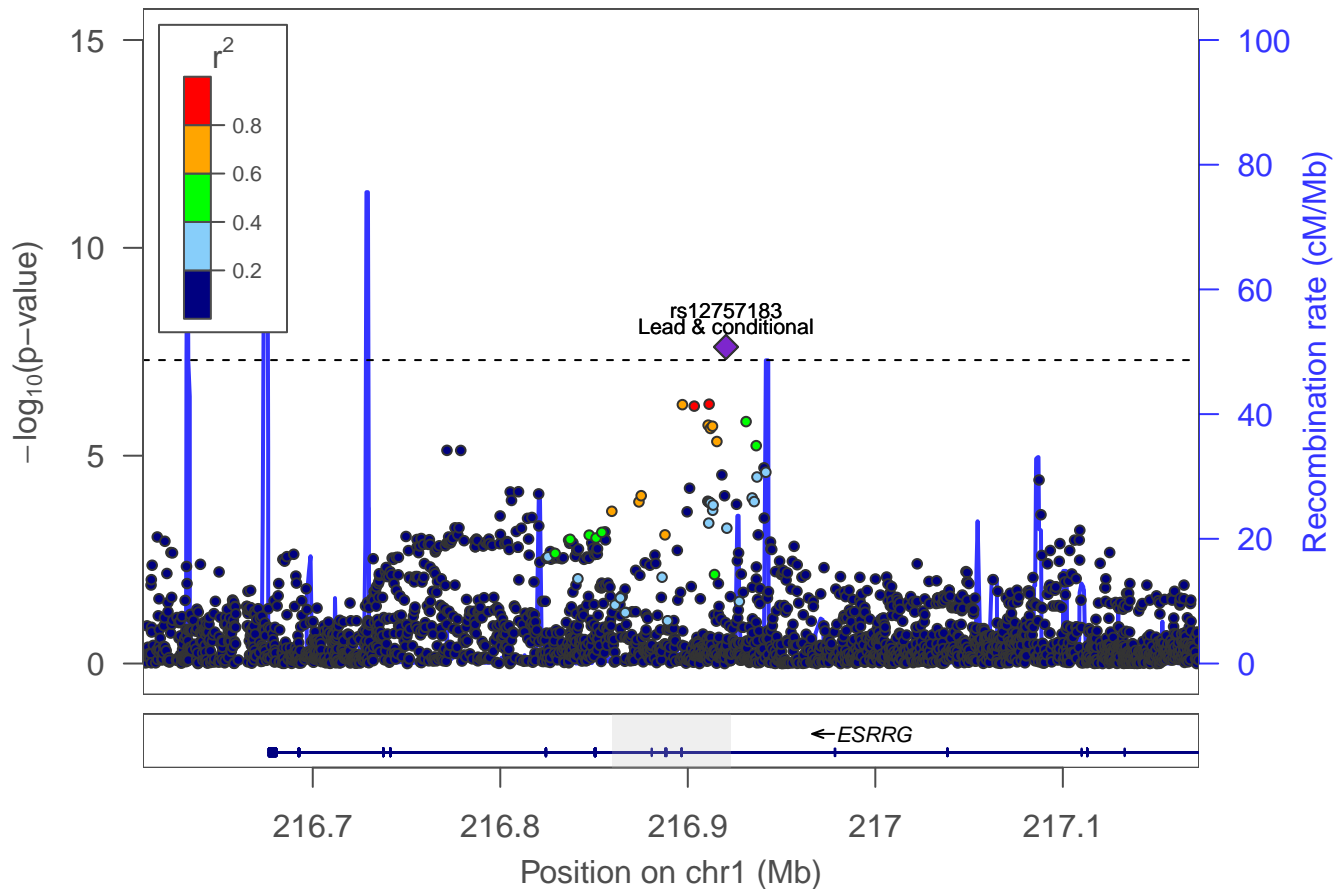

# Ever smoker: locus 19 [chr 1:227.220–227.619Mb]

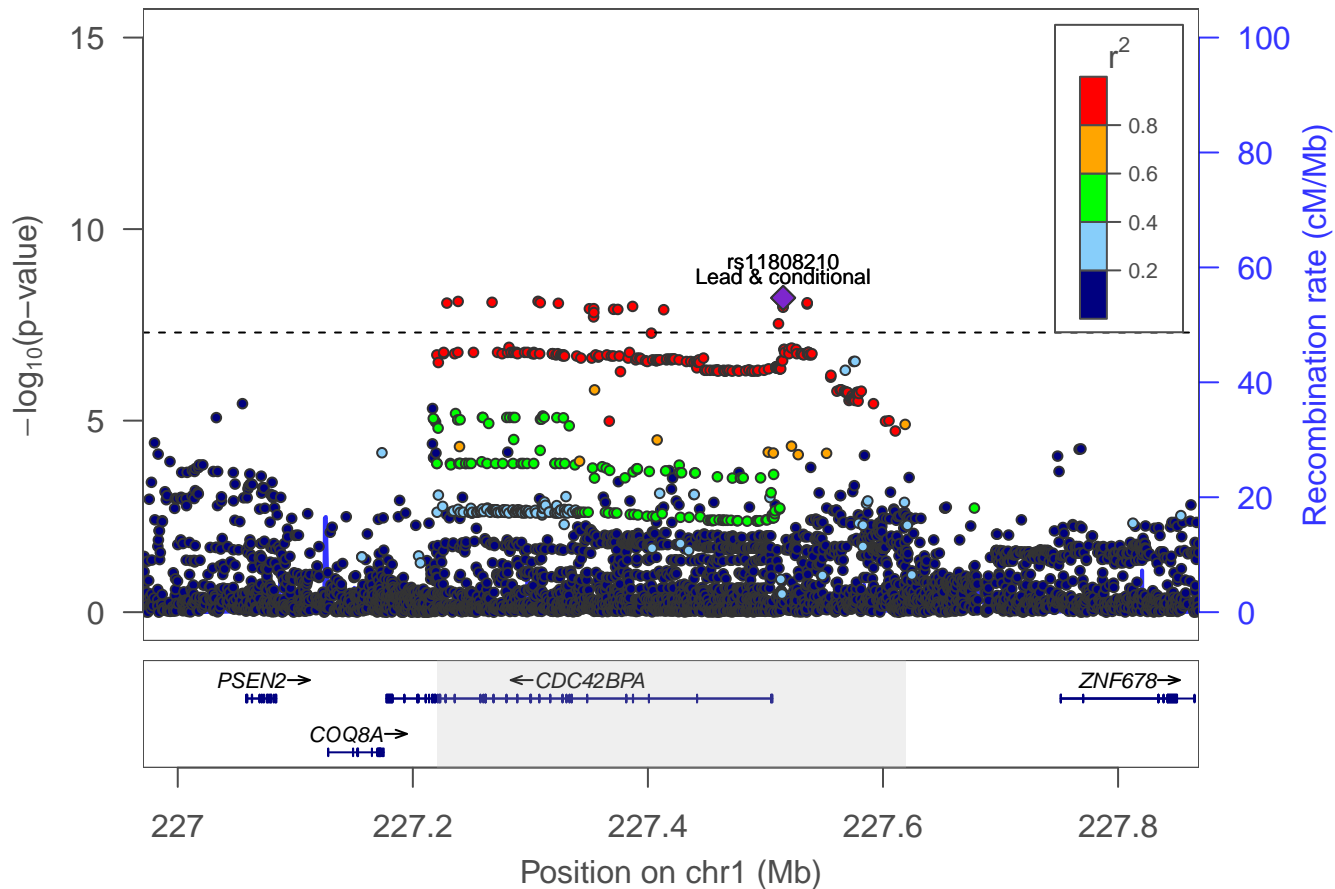



# Ever smoker: locus 20 [chr 2:0.601–0.654Mb]

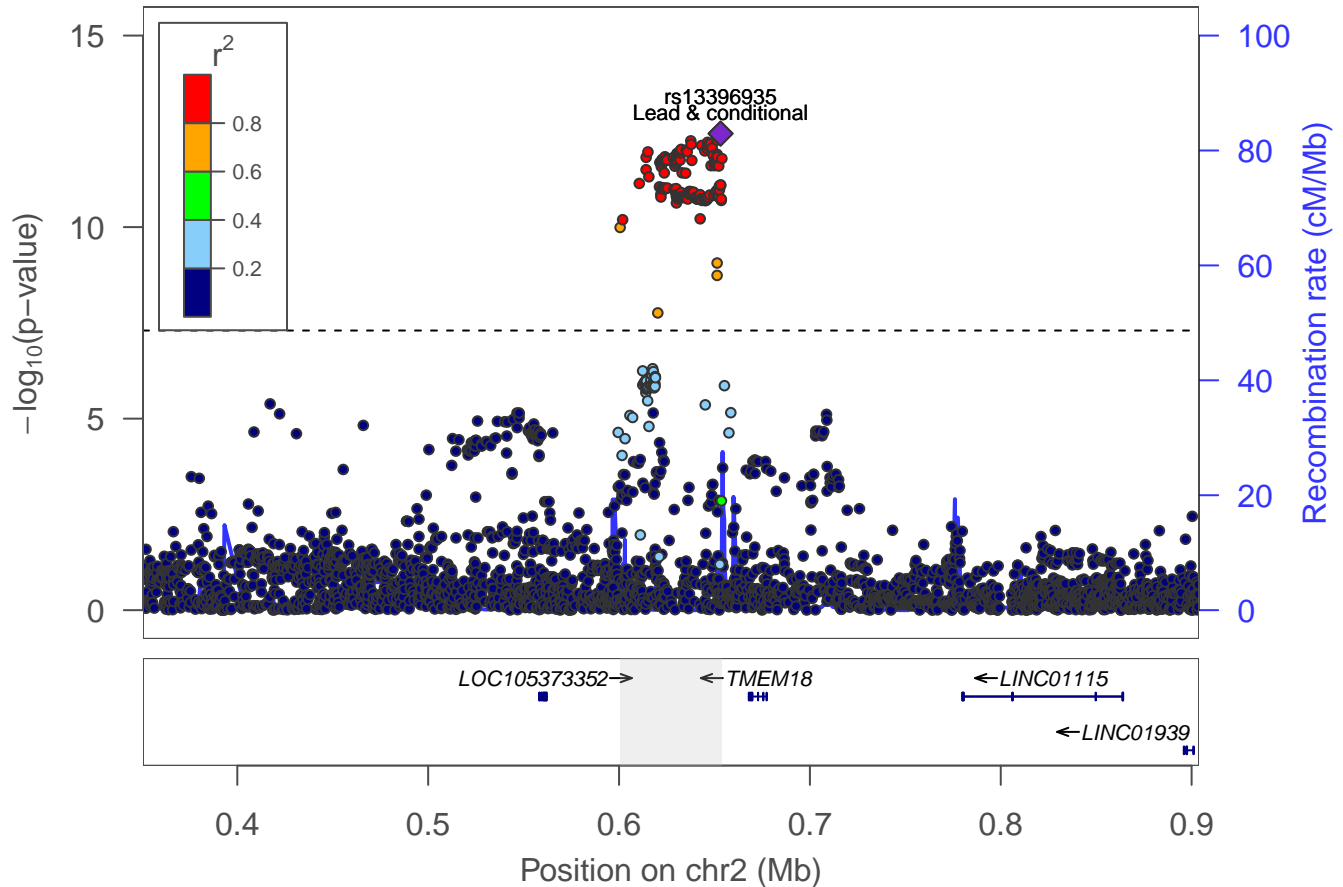

# Ever smoker: locus 21 [chr 2:44.113–44.250Mb]

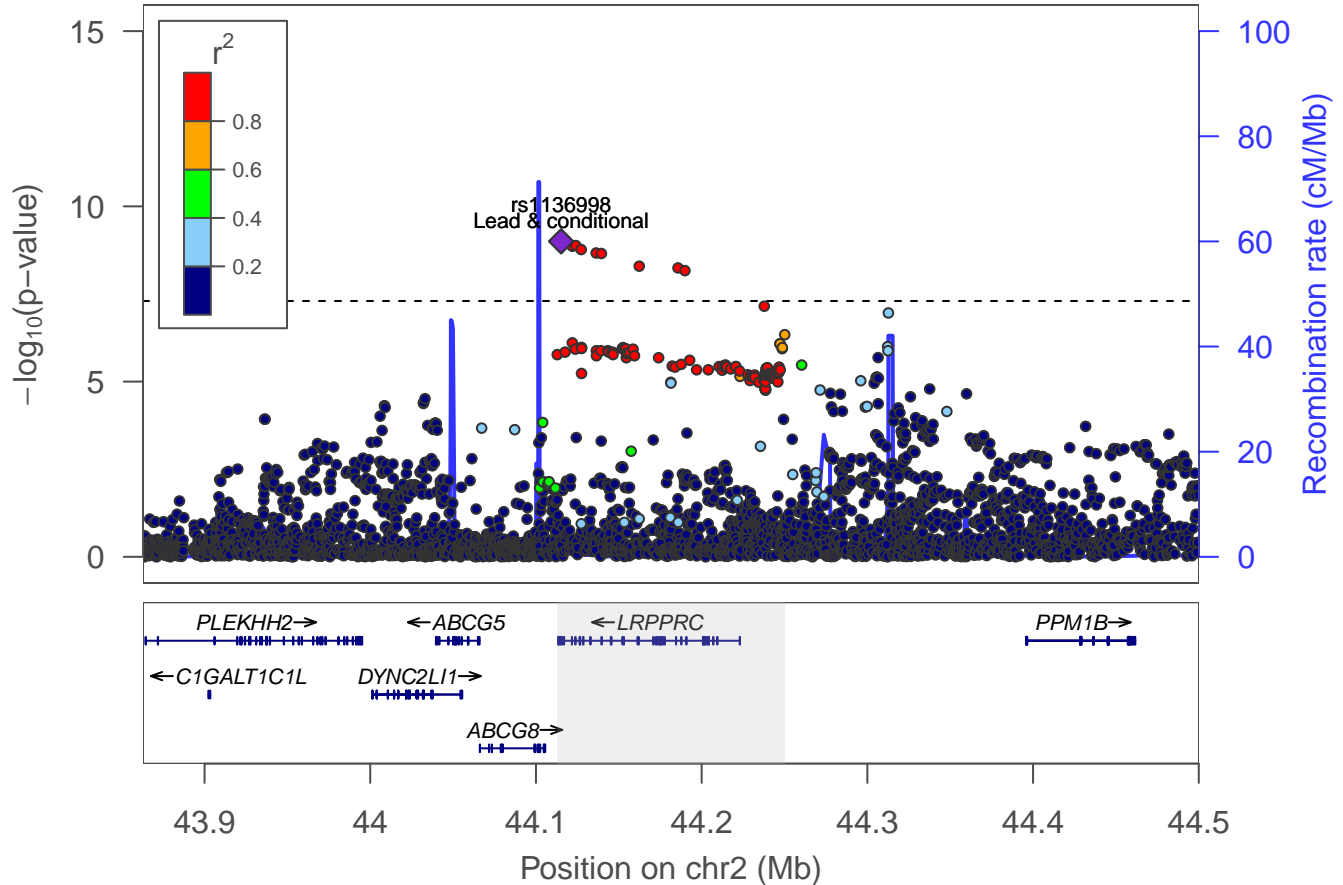

# Ever smoker: locus 22 [chr 2:45.121–45.176Mb]

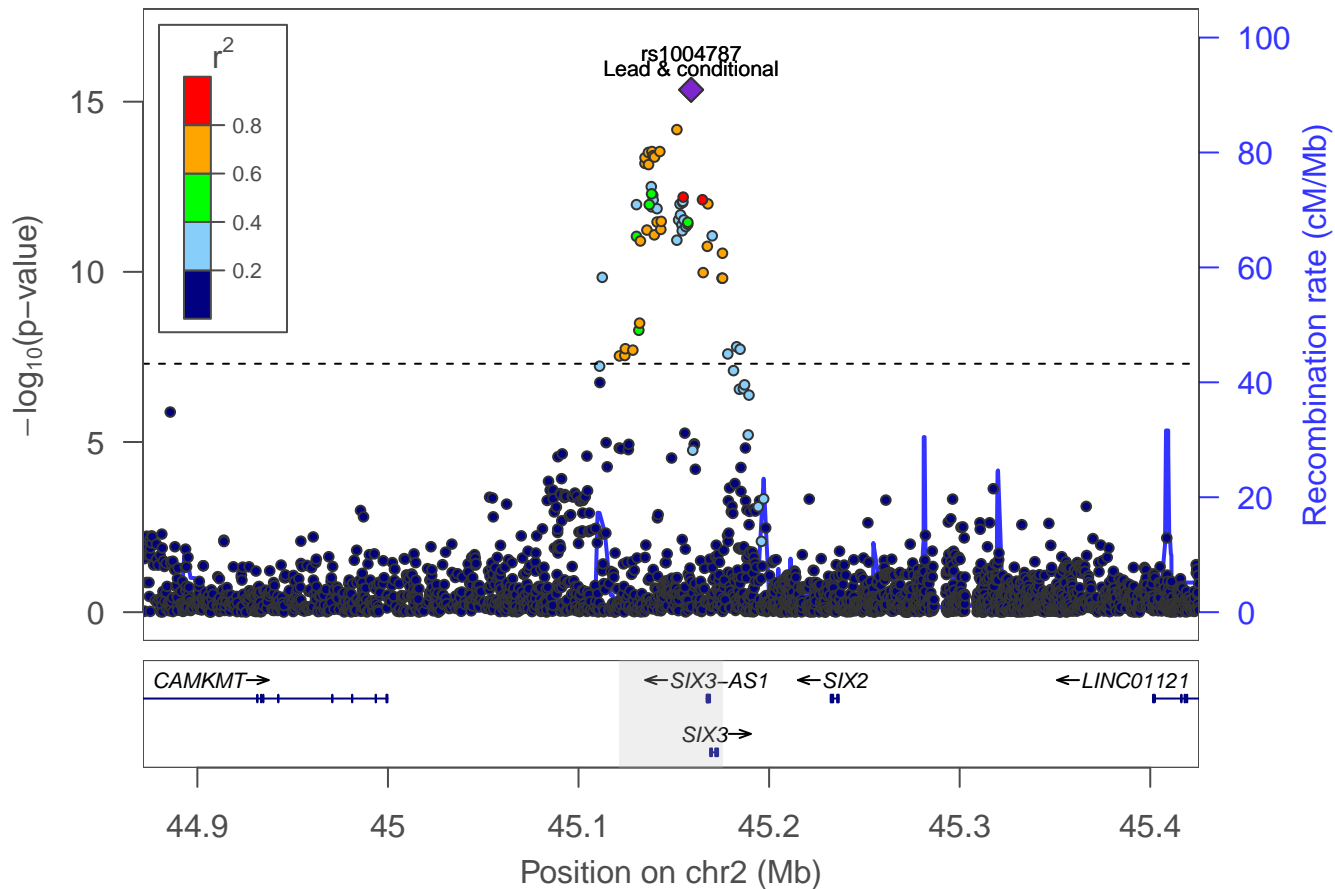

# Ever smoker: Locus 23 [chr 2: 59.277–59.326Mb]

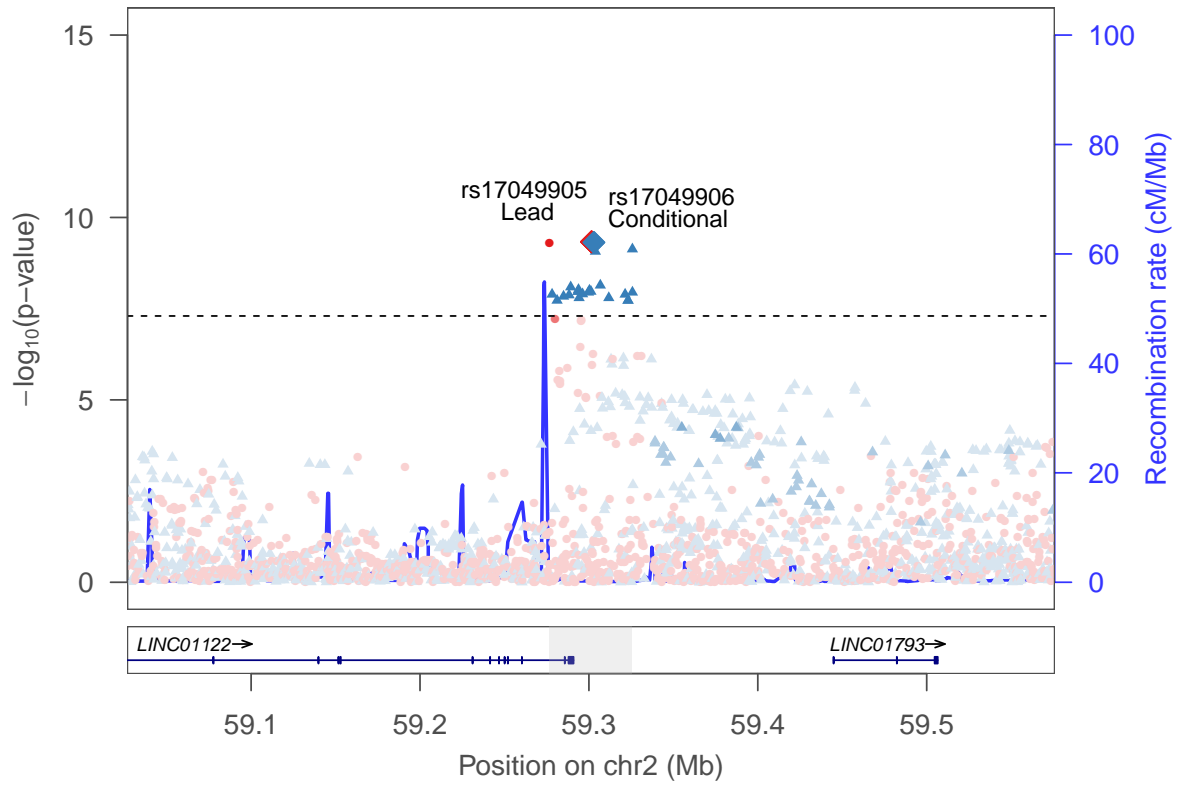

rs17049906 ▲  
rs17049905 ●

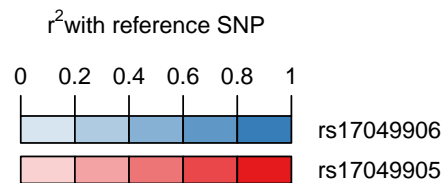

# Ever smoker: Locus 24 [chr 2: 60.000–60.532Mb]

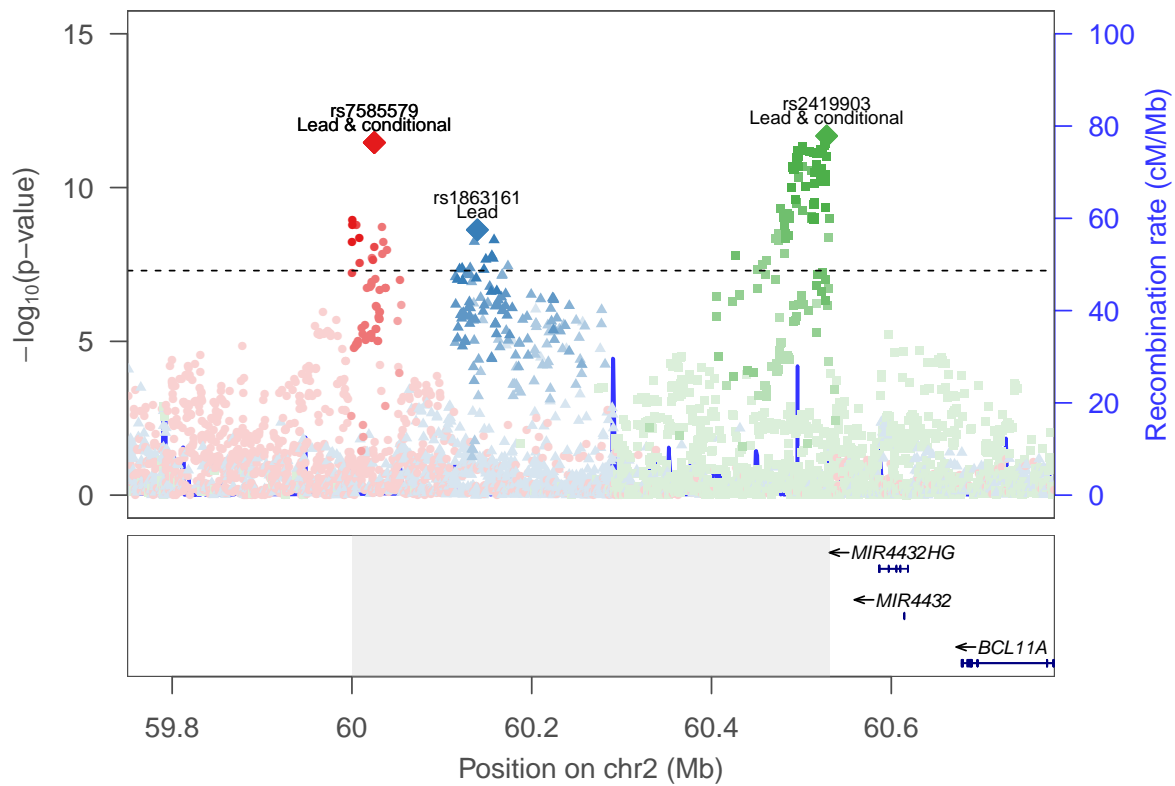

rs2419903 ■  
rs1863161 ▲  
rs7585579 ●

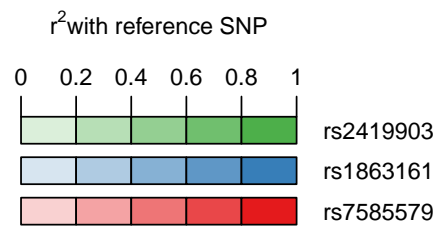

# Ever smoker: locus 25 [chr 2:63.235–64.093Mb]

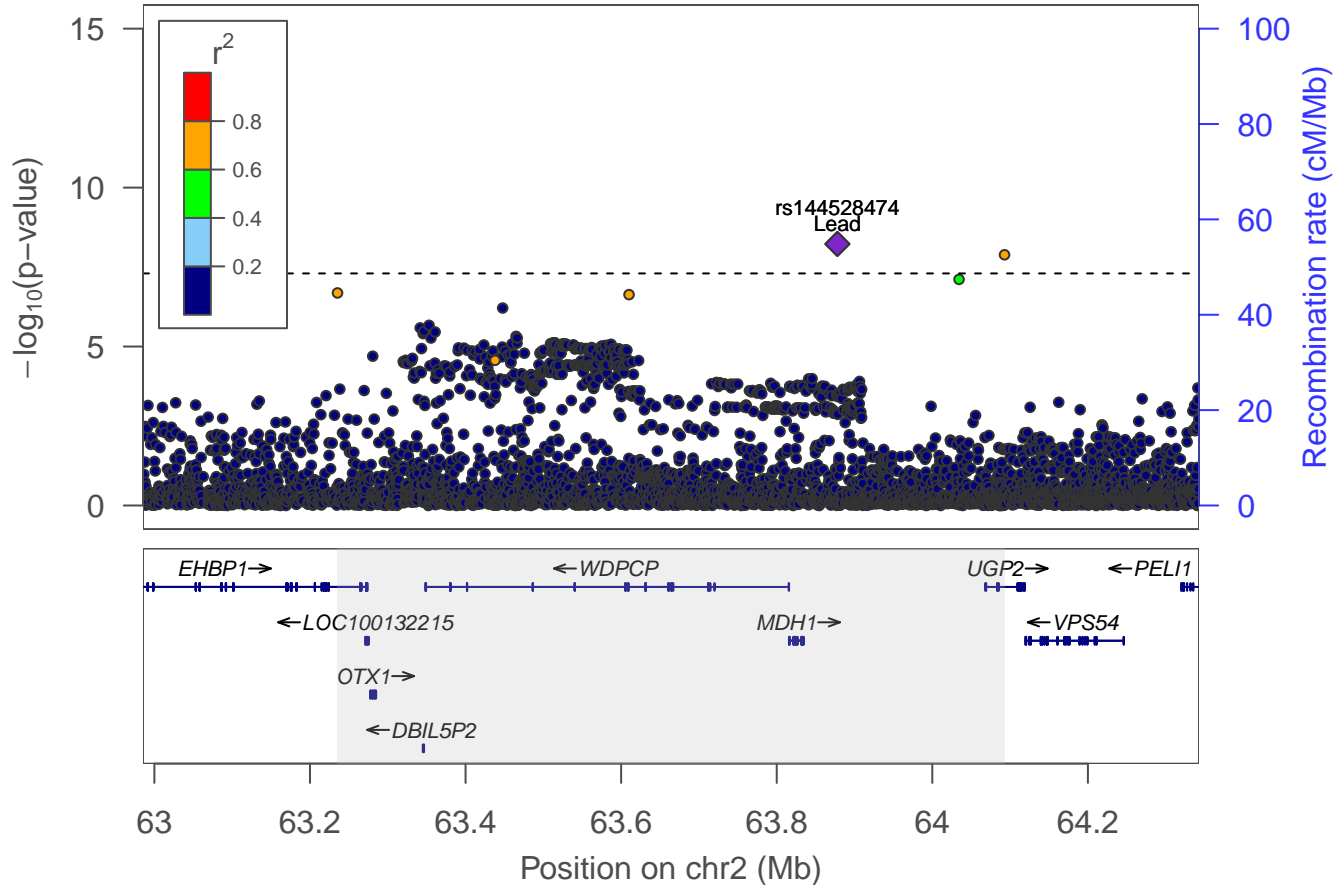

# Ever smoker: locus 26 [chr 2:80.955–81.088Mb]

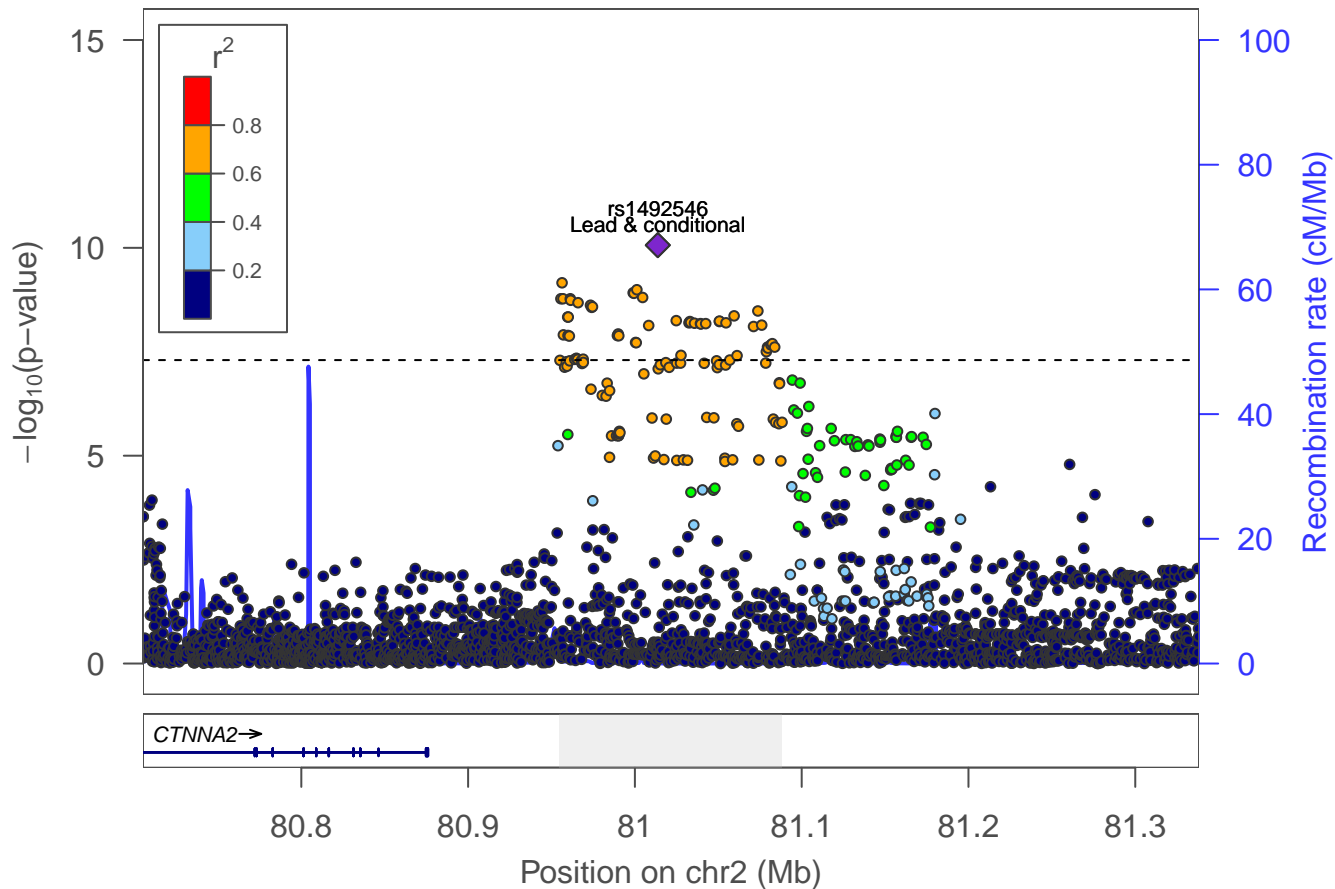

# Ever smoker: Locus 27 [chr 2: 103.778–104.381Mb]

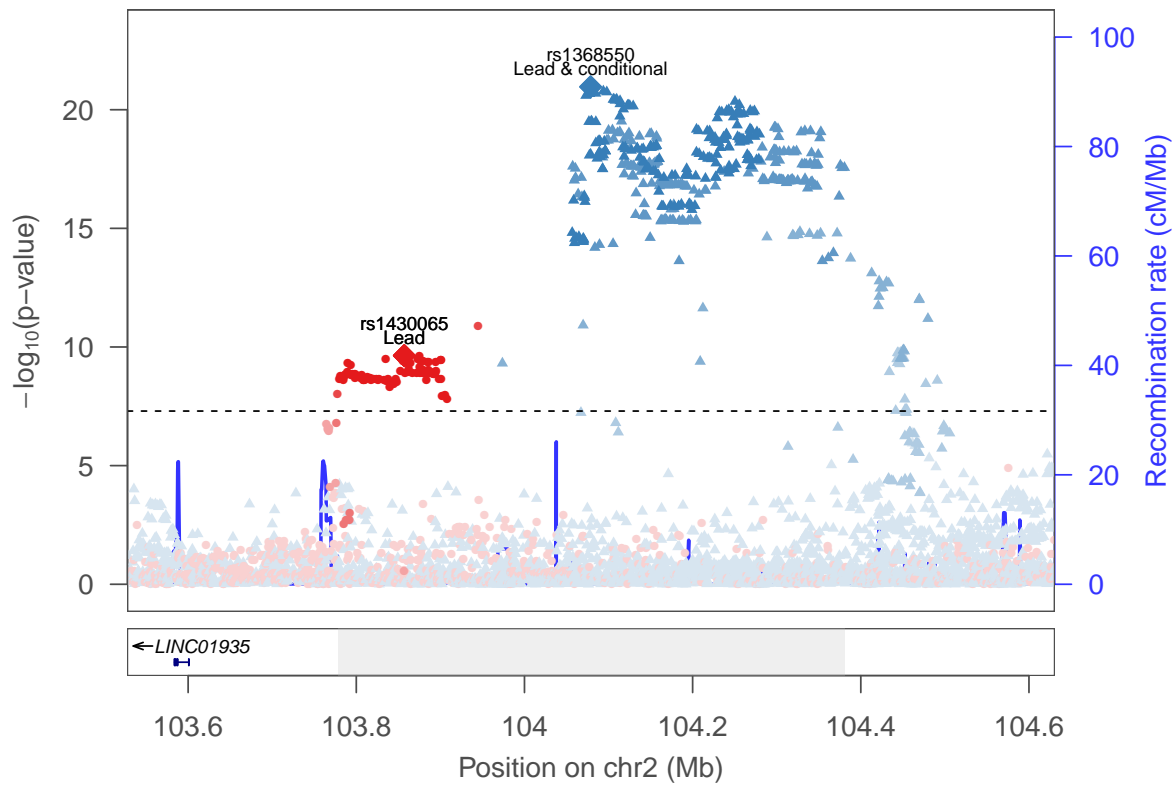

rs1368550 ▲  
rs1430065 ●

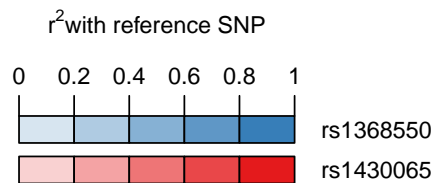



# Ever smoker: Locus 28 [chr 2: 113.246–113.347Mb]

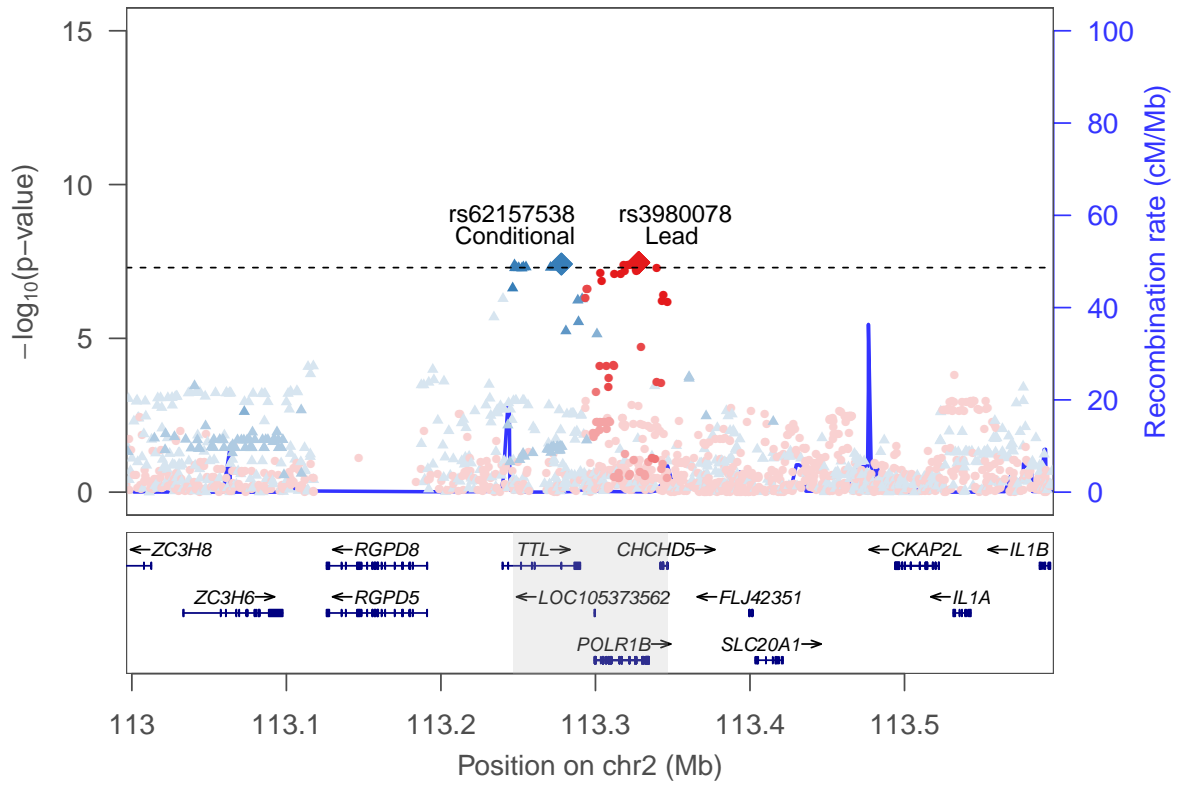

rs62157538 ▲  
 rs3980078 ●

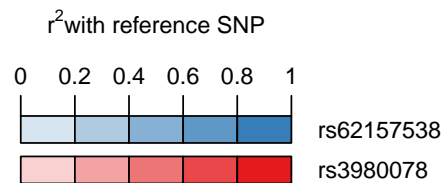

# Ever smoker: locus 29 [chr 2:118.162–118.362Mb]

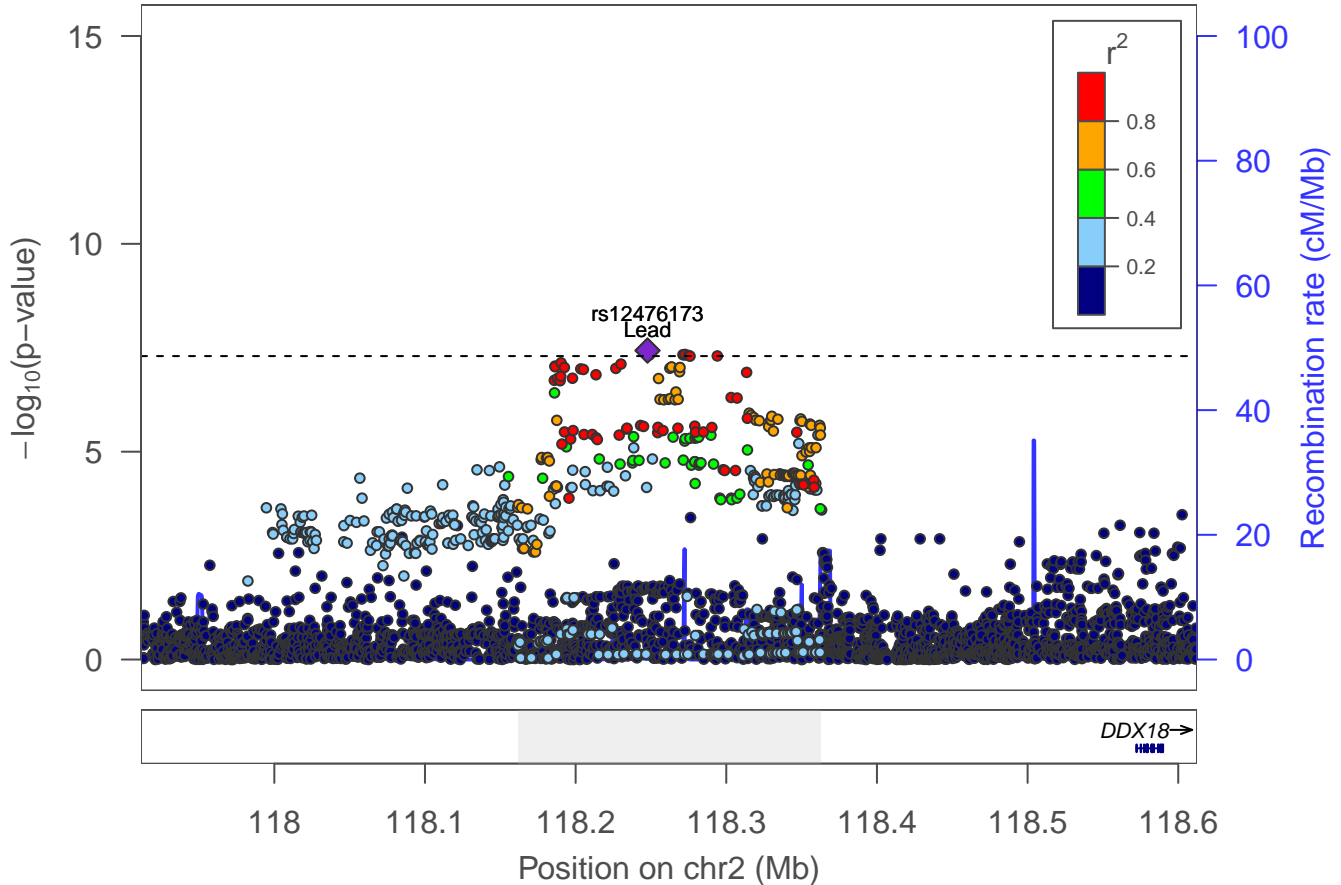

# Ever smoker: locus 30 [chr 2:122.326–122.912Mb]

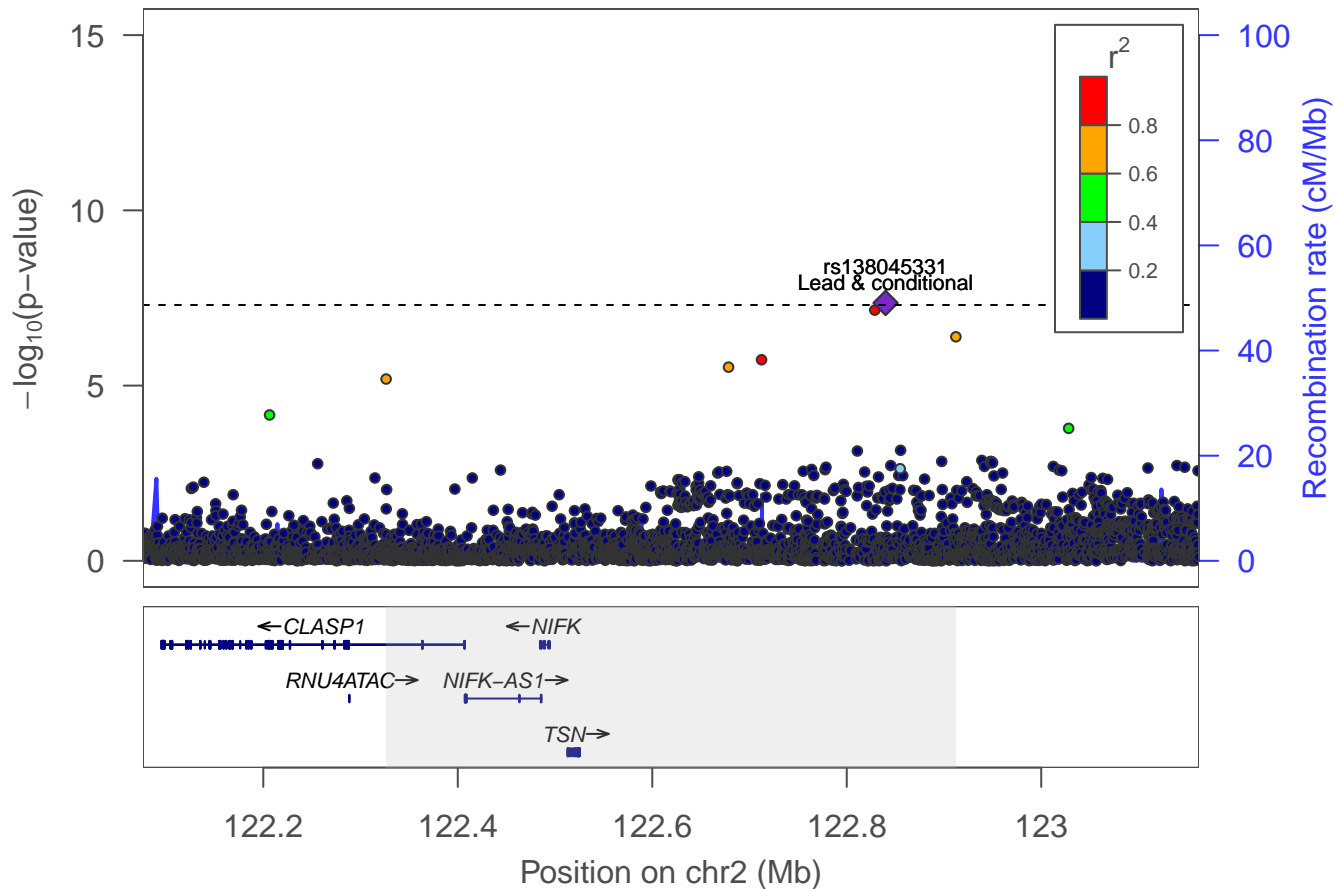

# Ever smoker: Locus 31 [chr 2: 137.103–137.678Mb]

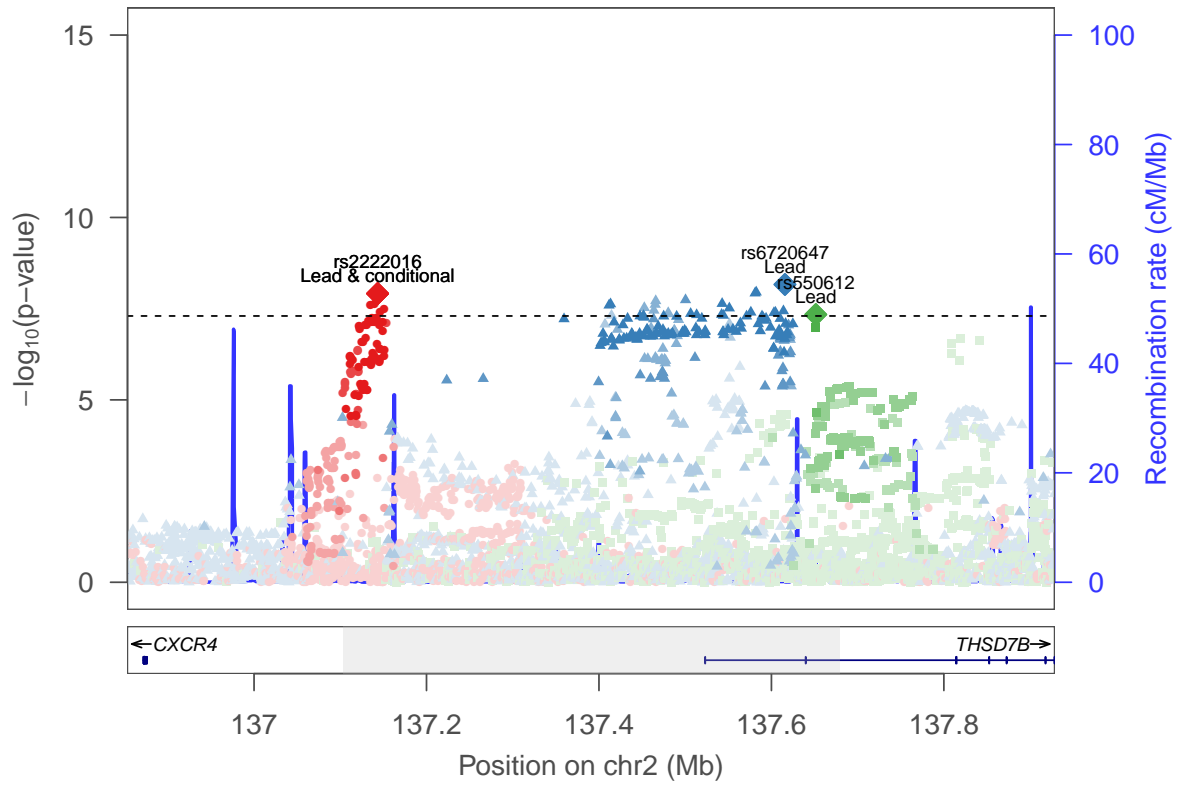

rs550612    ■  
rs6720647    ▲  
rs2222016    ●

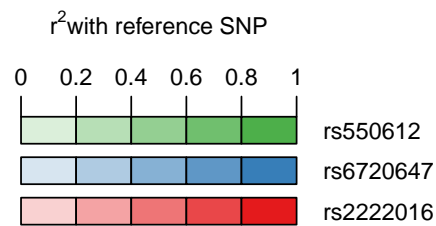

# Ever smoker: Locus 32 [chr 2: 145.400–146.303Mb]

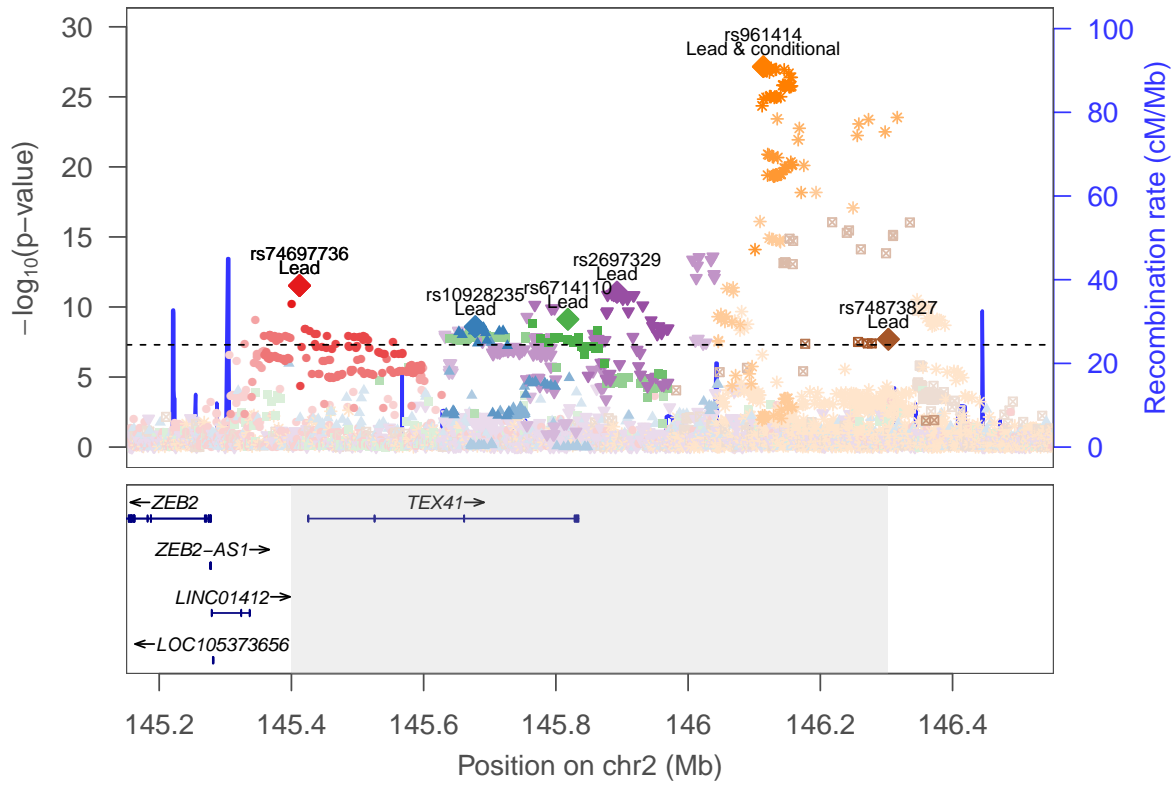

rs74873827   
 rs961414   
 rs2697329   
 rs6714110   
 rs10928235   
 rs74697736 

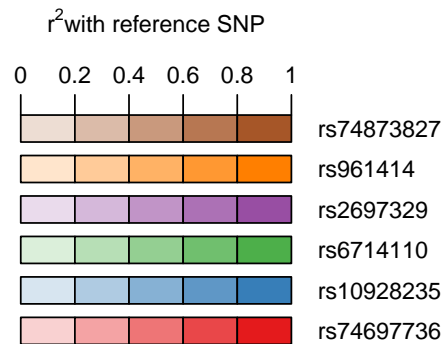

# Ever smoker: locus 33 [chr 2:155.655–156.109Mb]

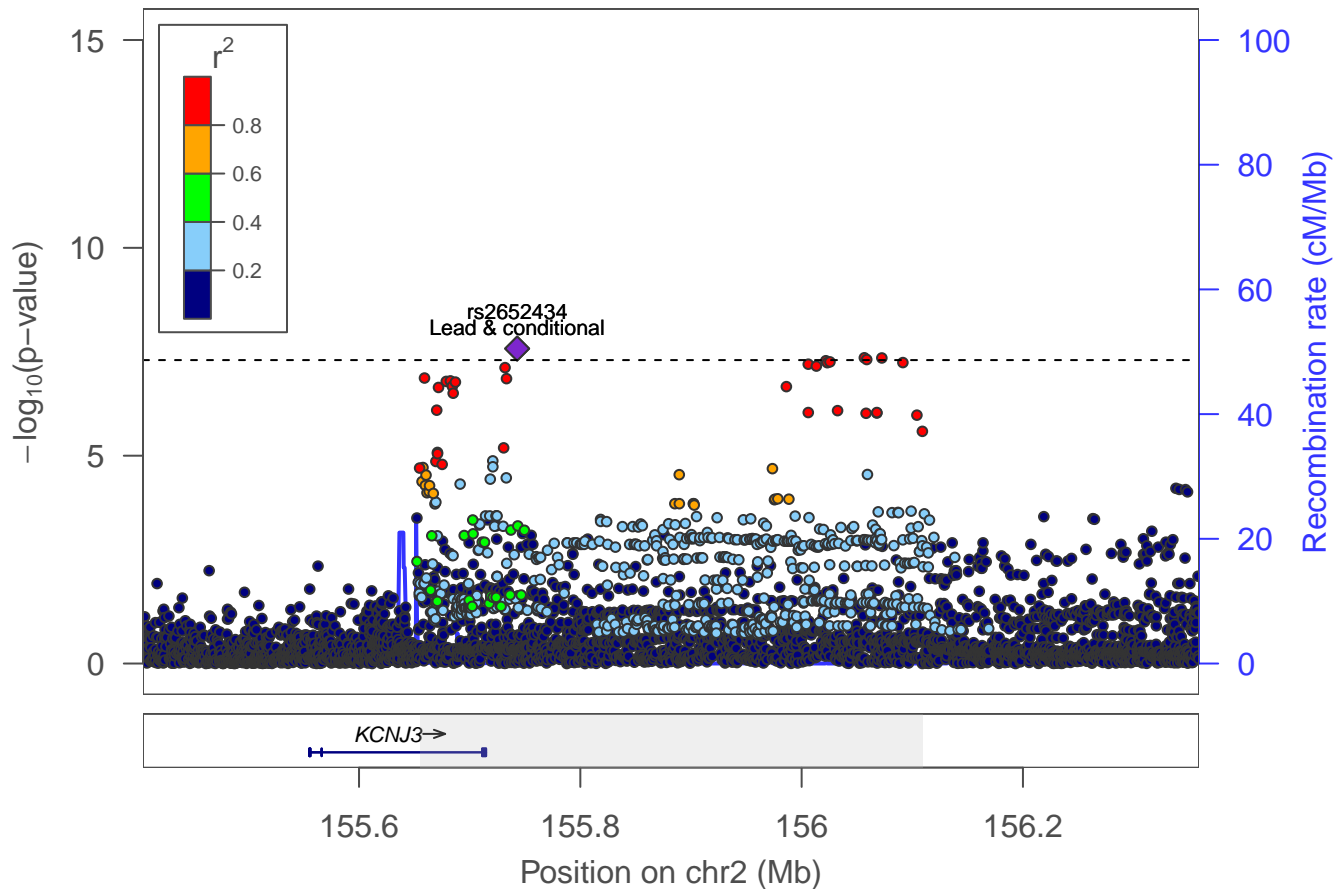

# Ever smoker: Locus 34 [chr 2: 161.905–162.412Mb]

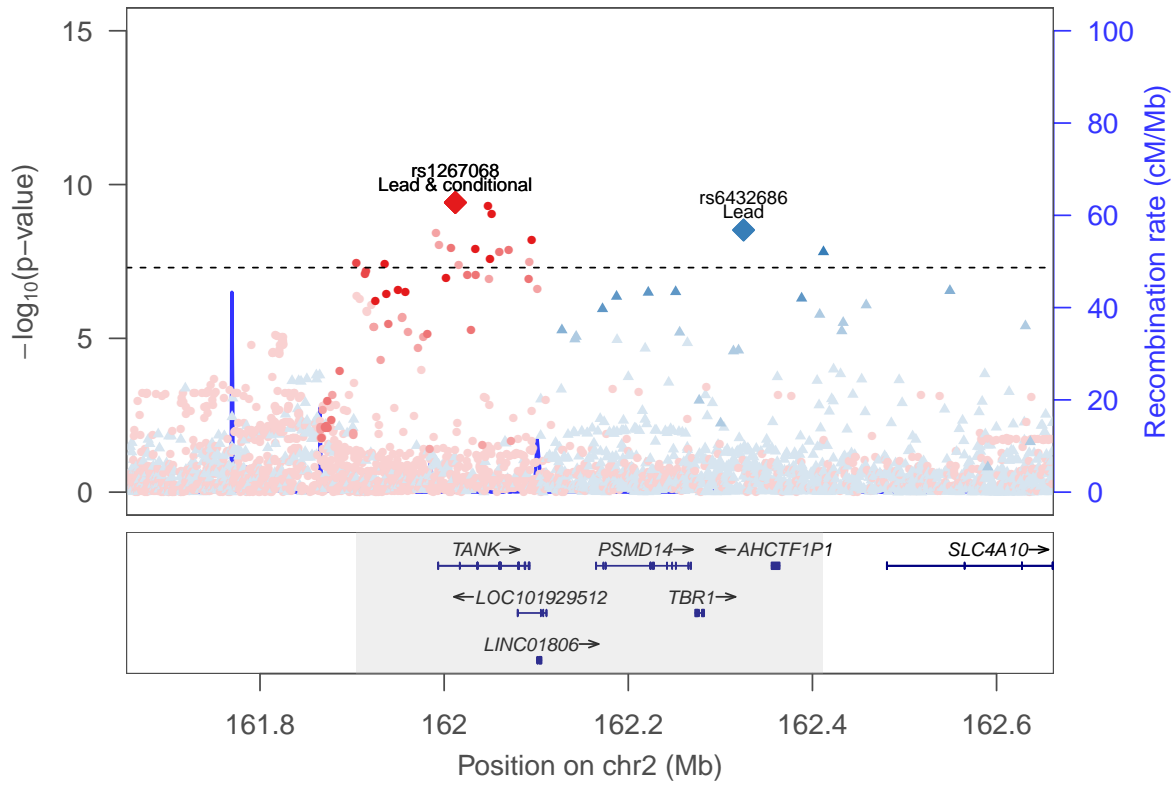

rs6432686 ▲  
rs1267068 ●

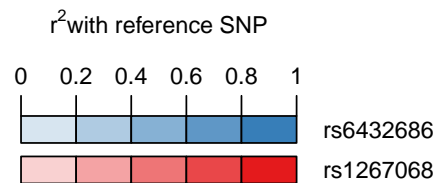

# Ever smoker: locus 35 [chr 2:162.797–162.910Mb]

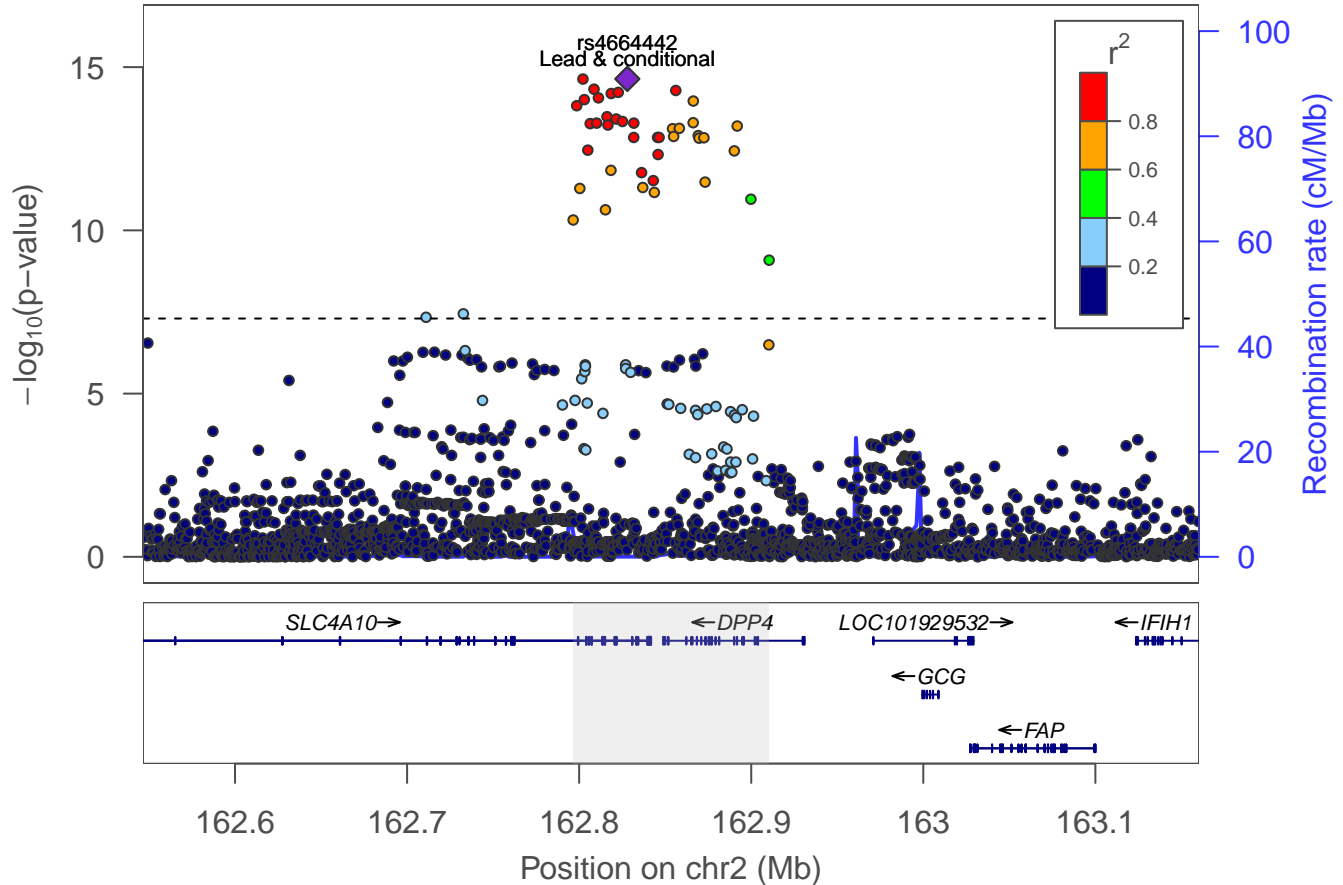



# Ever smoker: locus 36 [chr 2:173.932–174.072Mb]

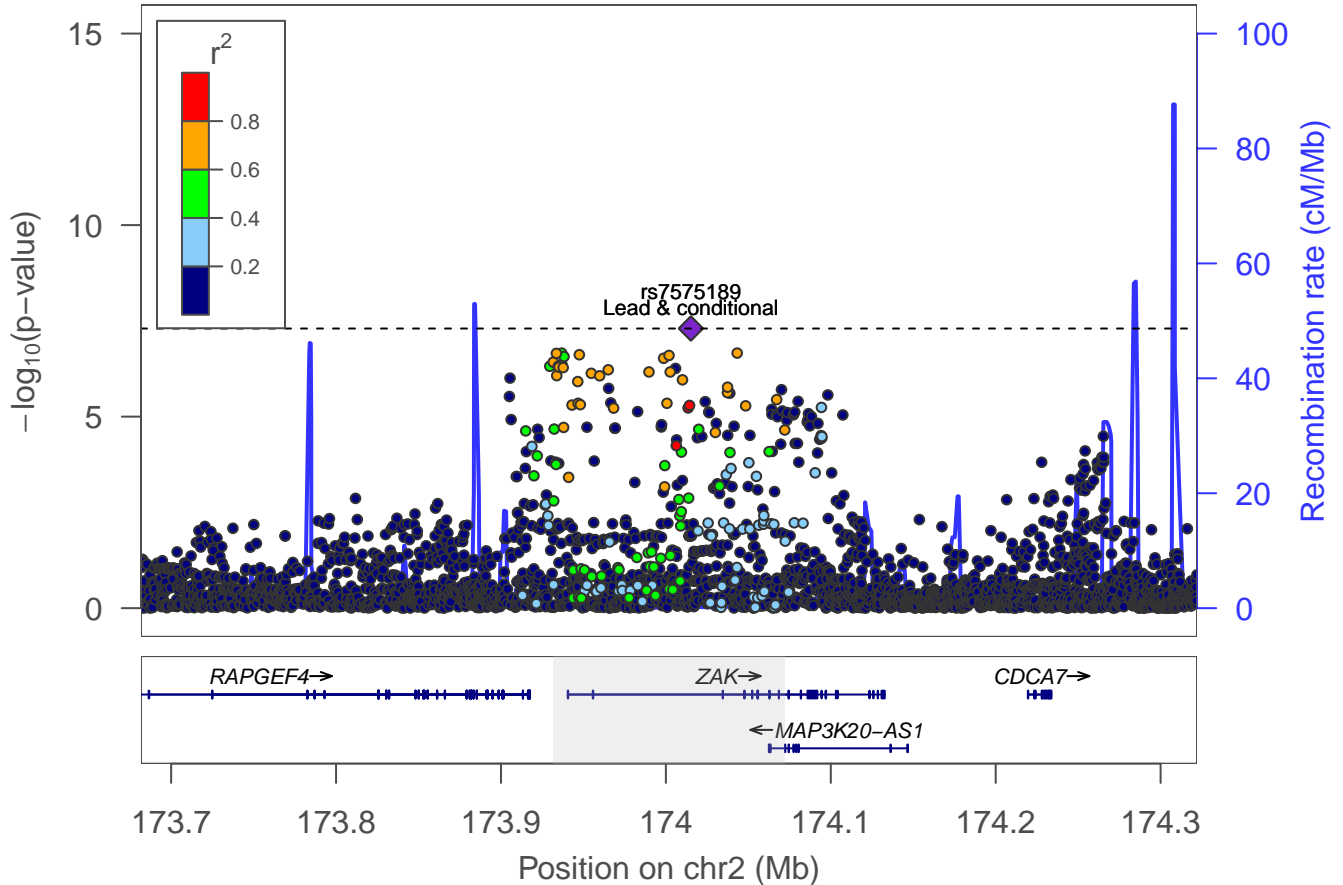

# Ever smoker: locus 37 [chr 2:174.930–175.096Mb]

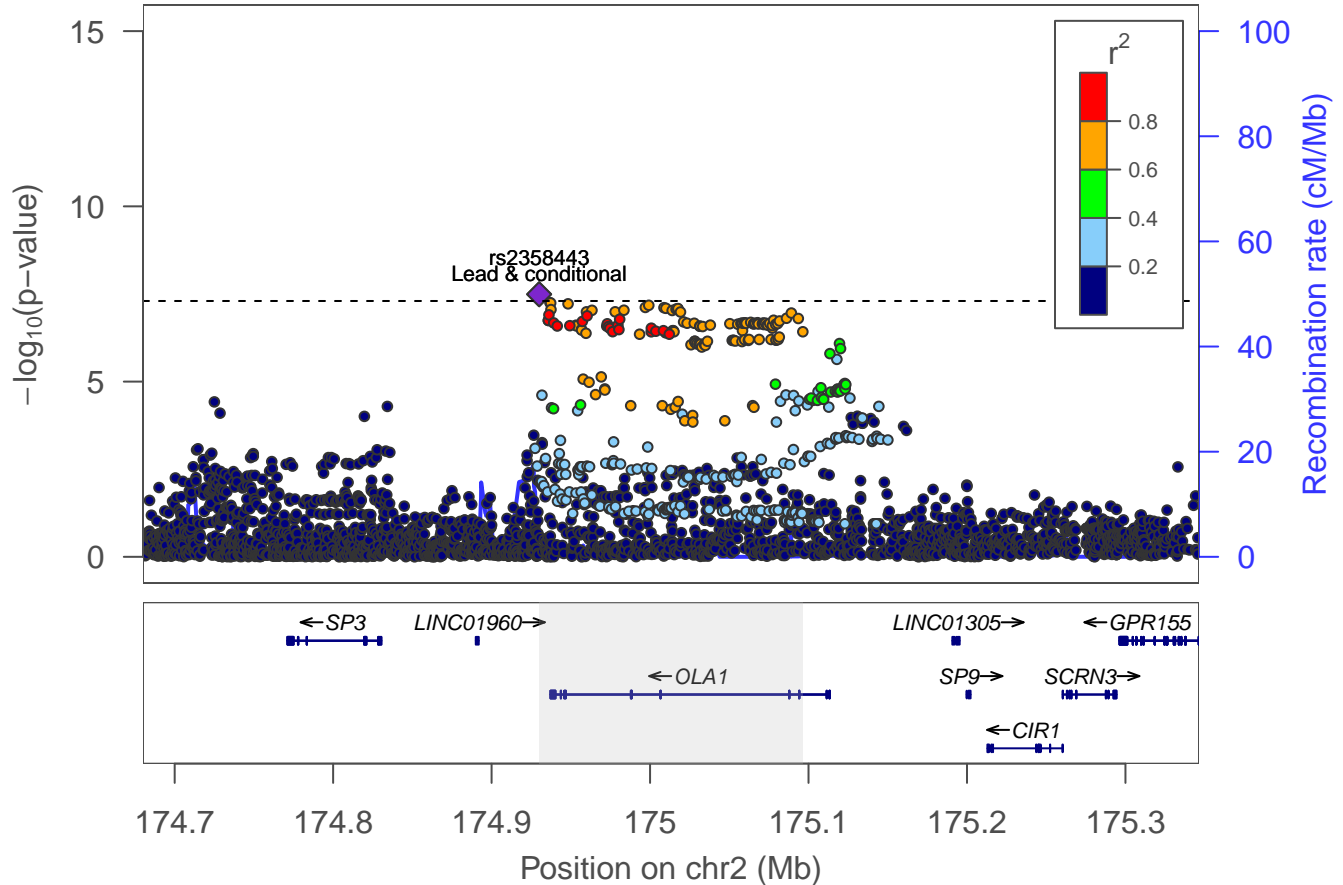

# Ever smoker: locus 38 [chr 2:178.736–179.045Mb]

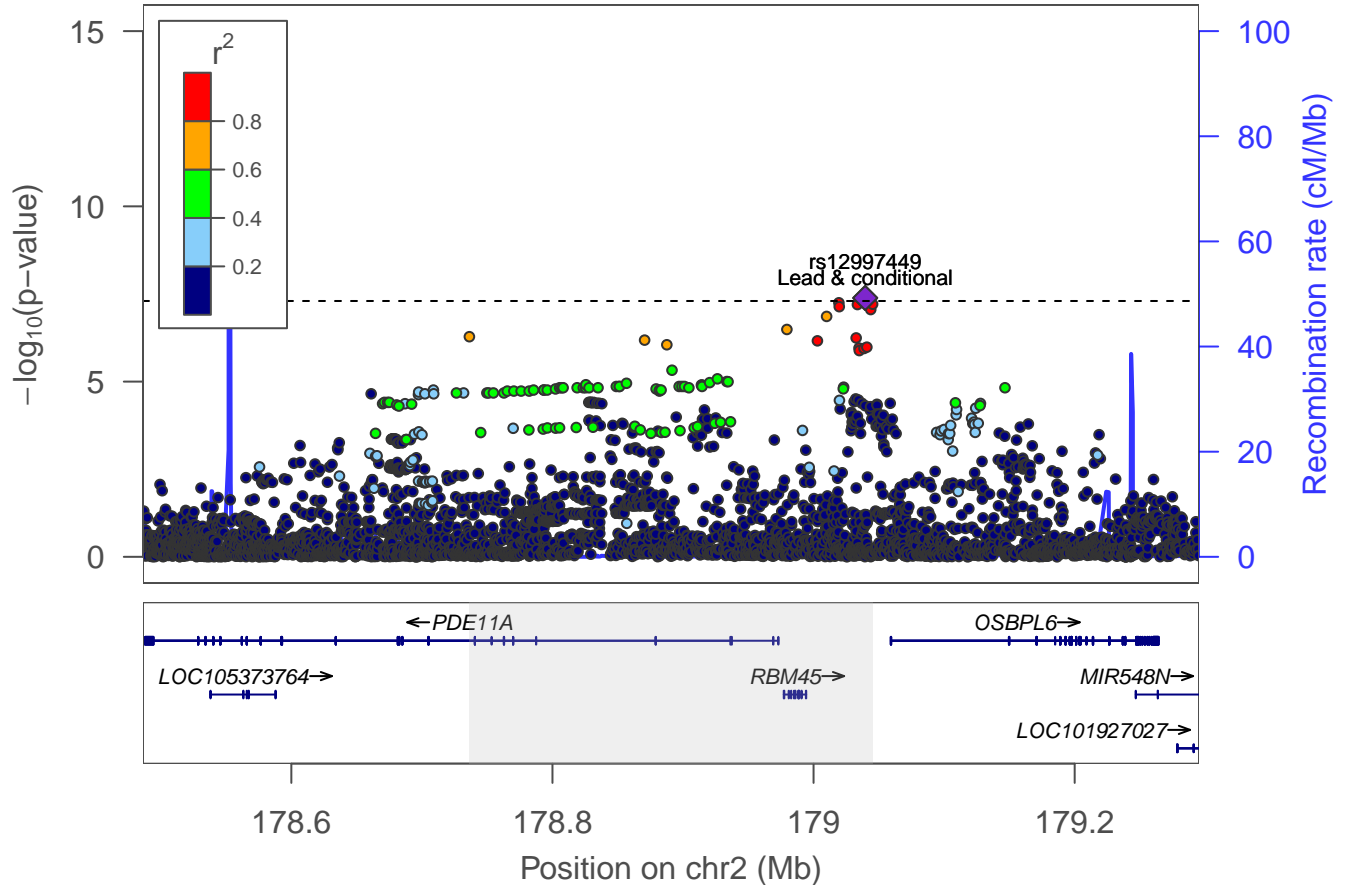

# Ever smoker: locus 39 [chr 2:207.955–207.977Mb]

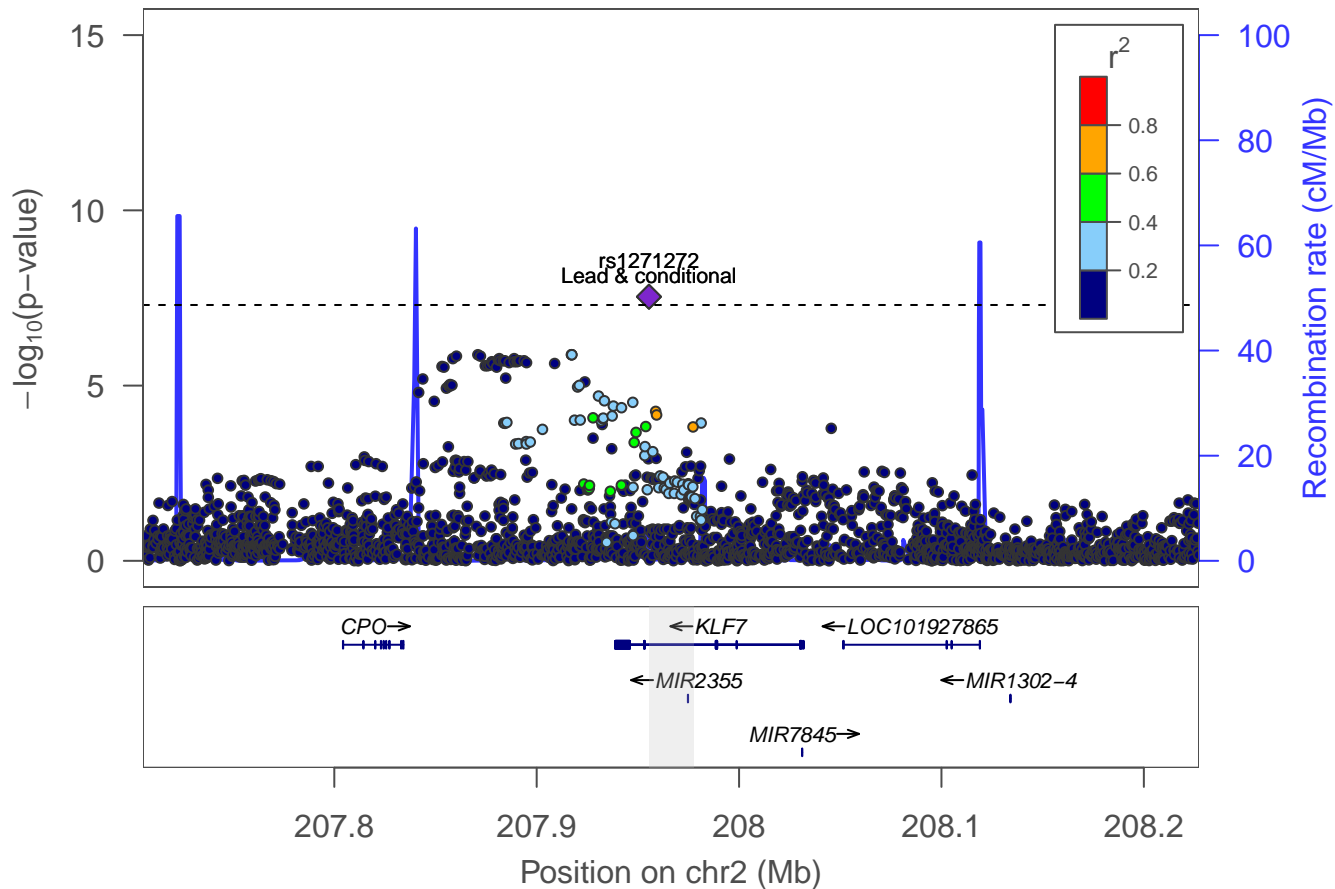

# Ever smoker: locus 40 [chr 2:226.247–226.351Mb]

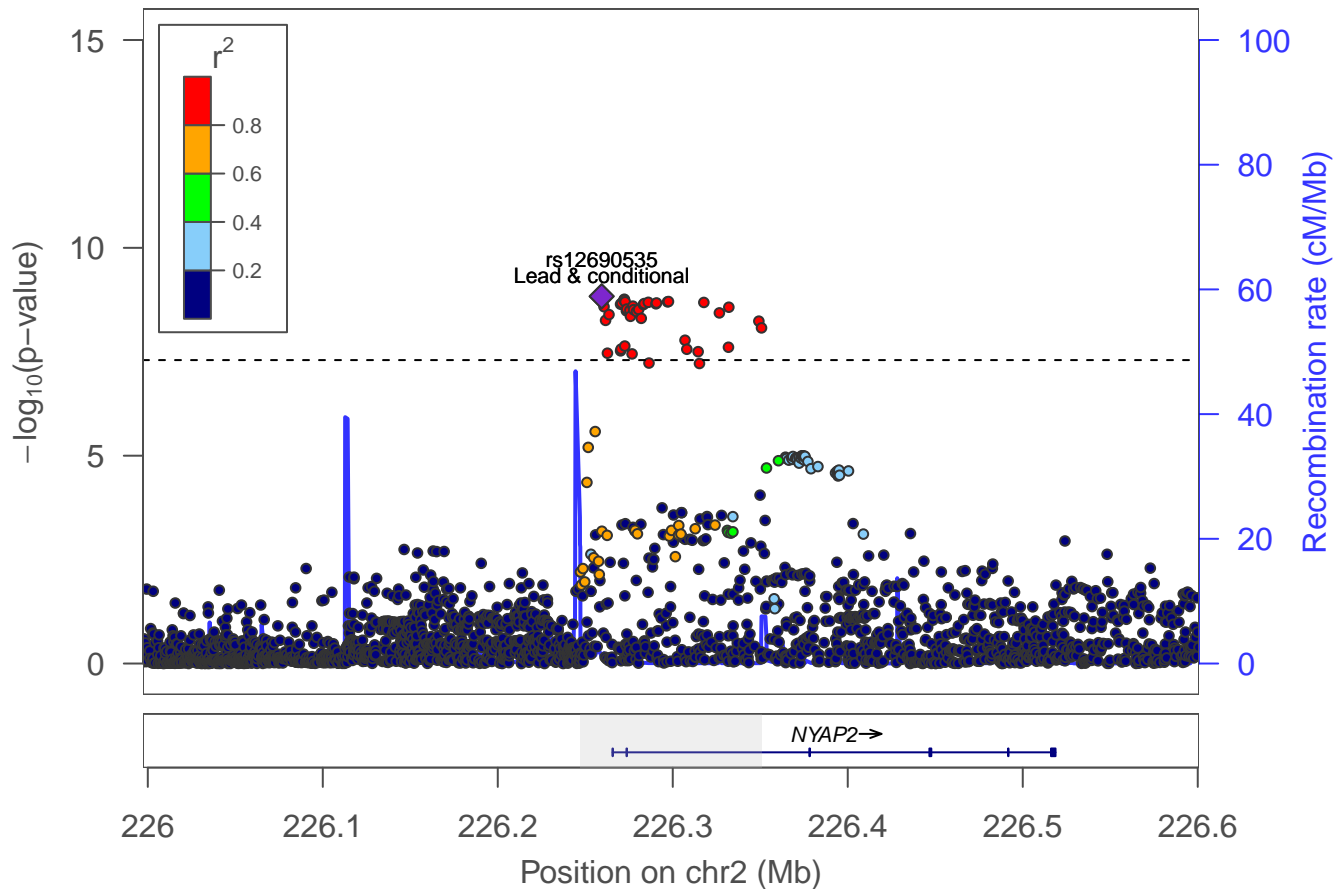

# Ever smoker: locus 41 [chr 3:5.720–5.740Mb]

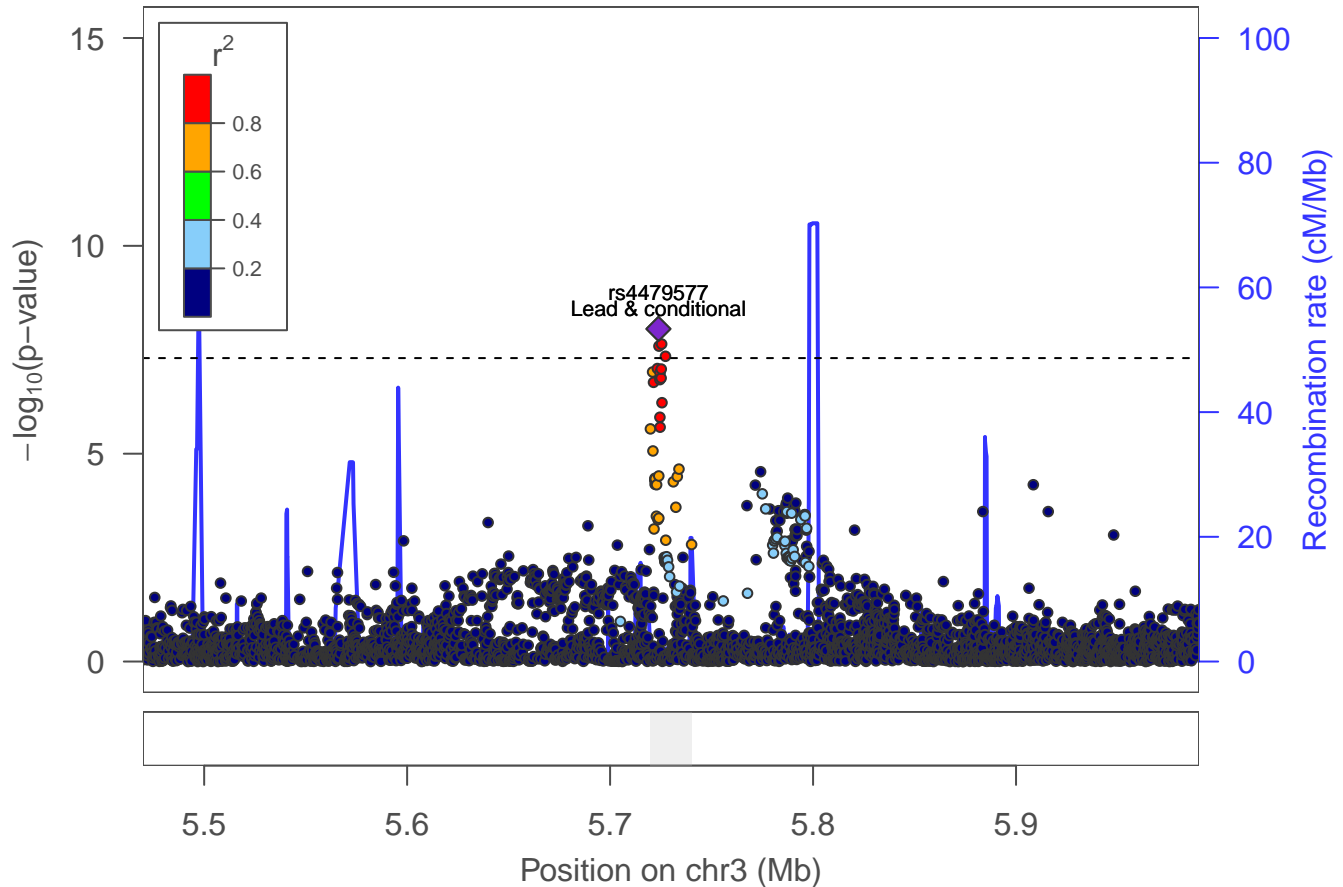

# Ever smoker: Locus 42 [chr 3: 25.169–25.296Mb]

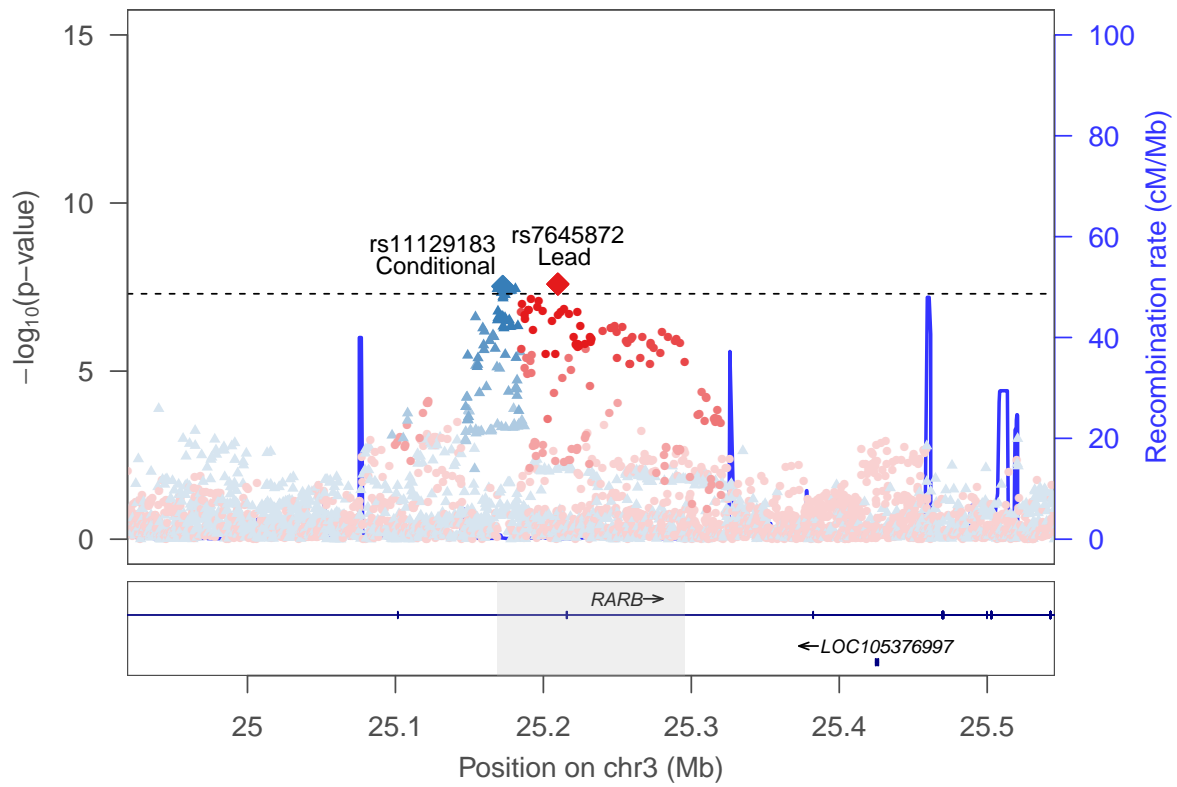

rs11129183 ▲  
rs7645872 ●

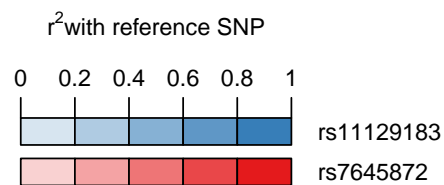

# Ever smoker: locus 43 [chr 3:34.422–34.539Mb]

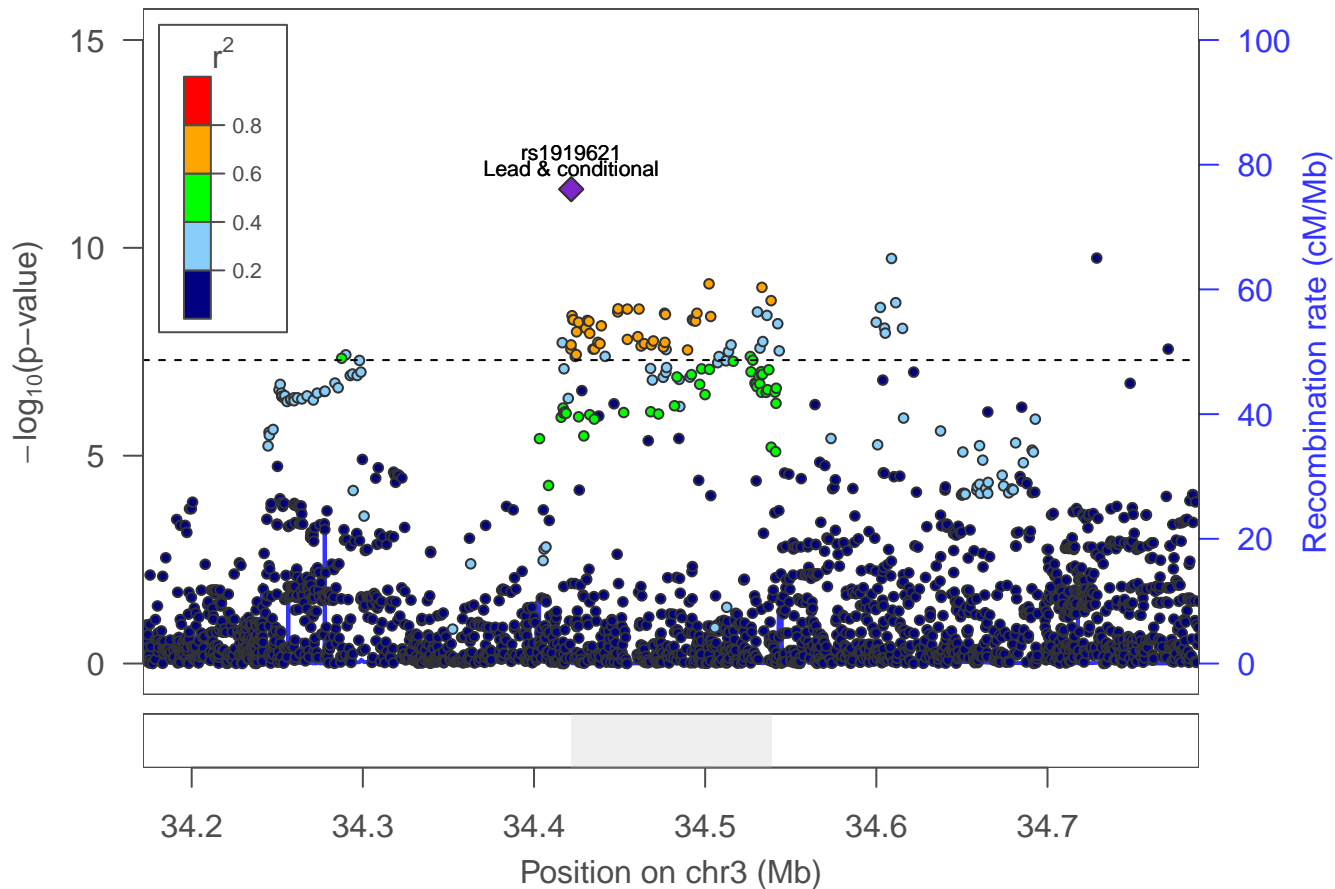



# Ever smoker: locus 44 [chr 3:50.188–50.251Mb]

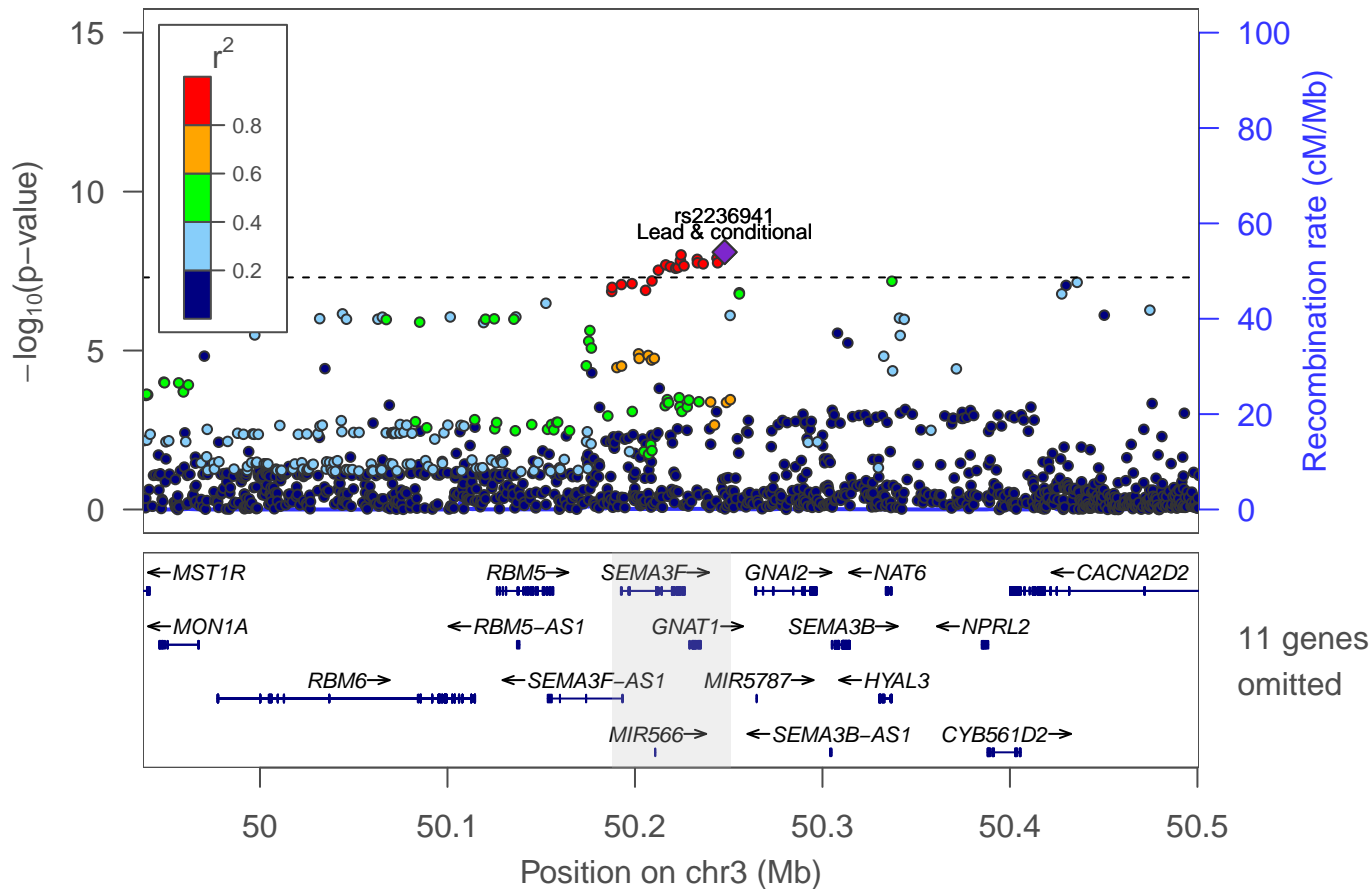

# Ever smoker: locus 45 [chr 3:52.380–52.926Mb]

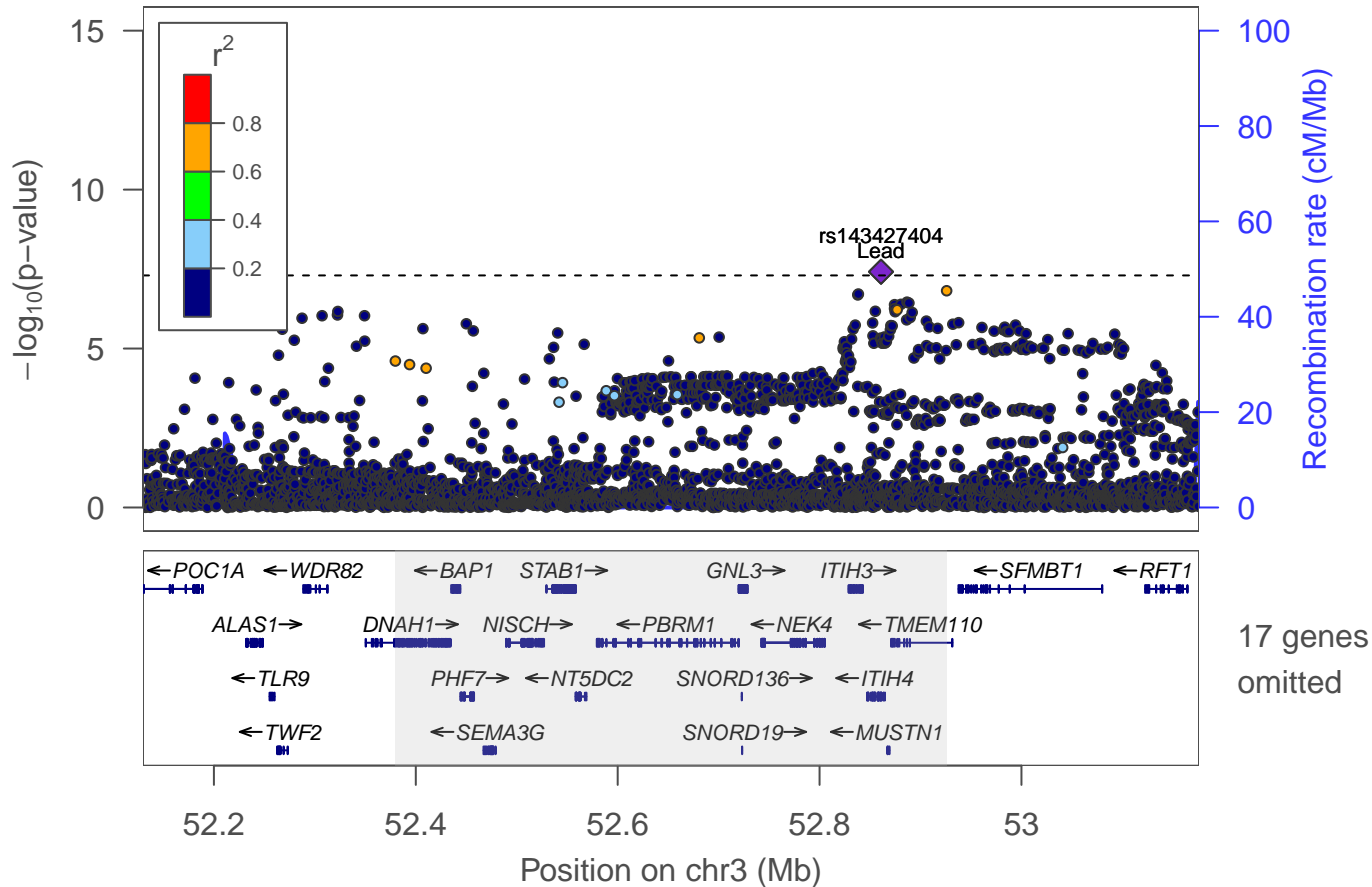

# Ever smoker: Locus 46 [chr 3: 53.746–53.792Mb]

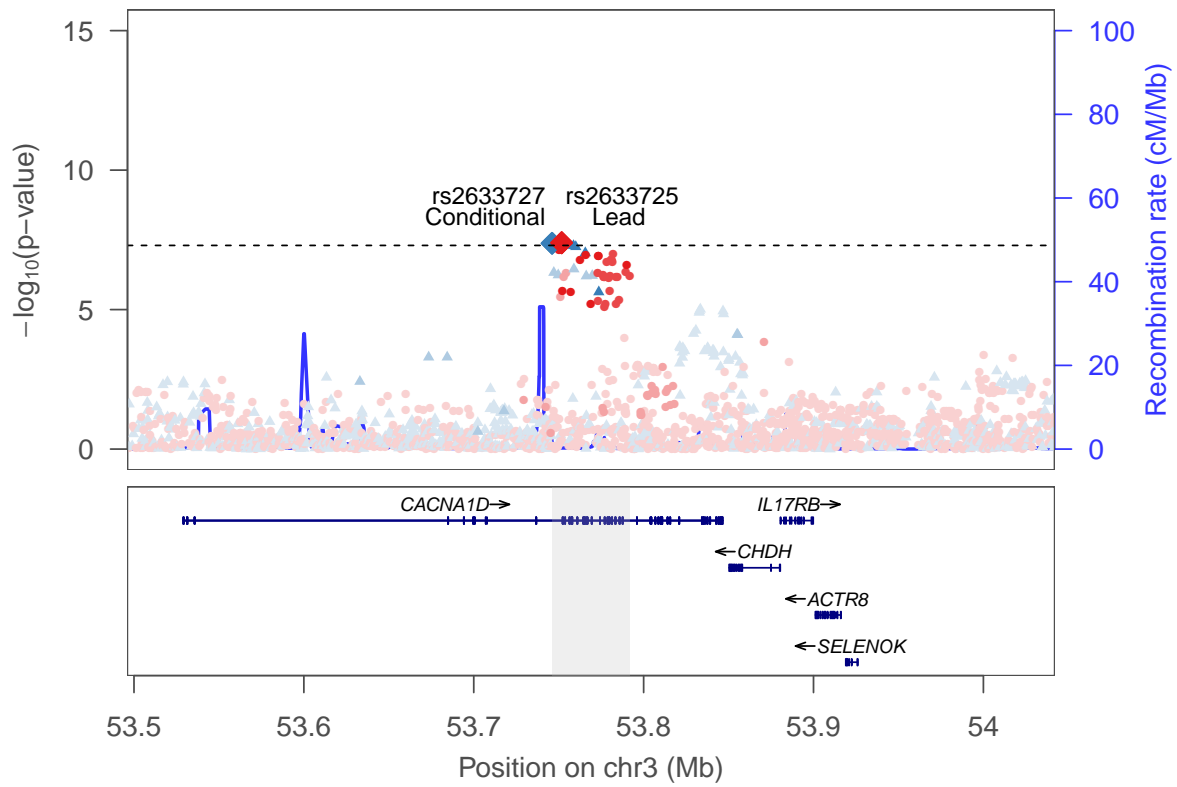

rs2633727 ▲  
rs2633725 ●

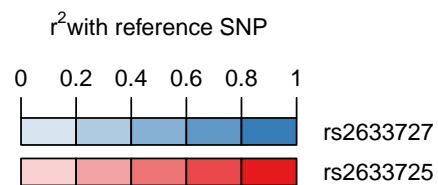

# Ever smoker: Locus 47 [chr 3: 83.536–84.836Mb]

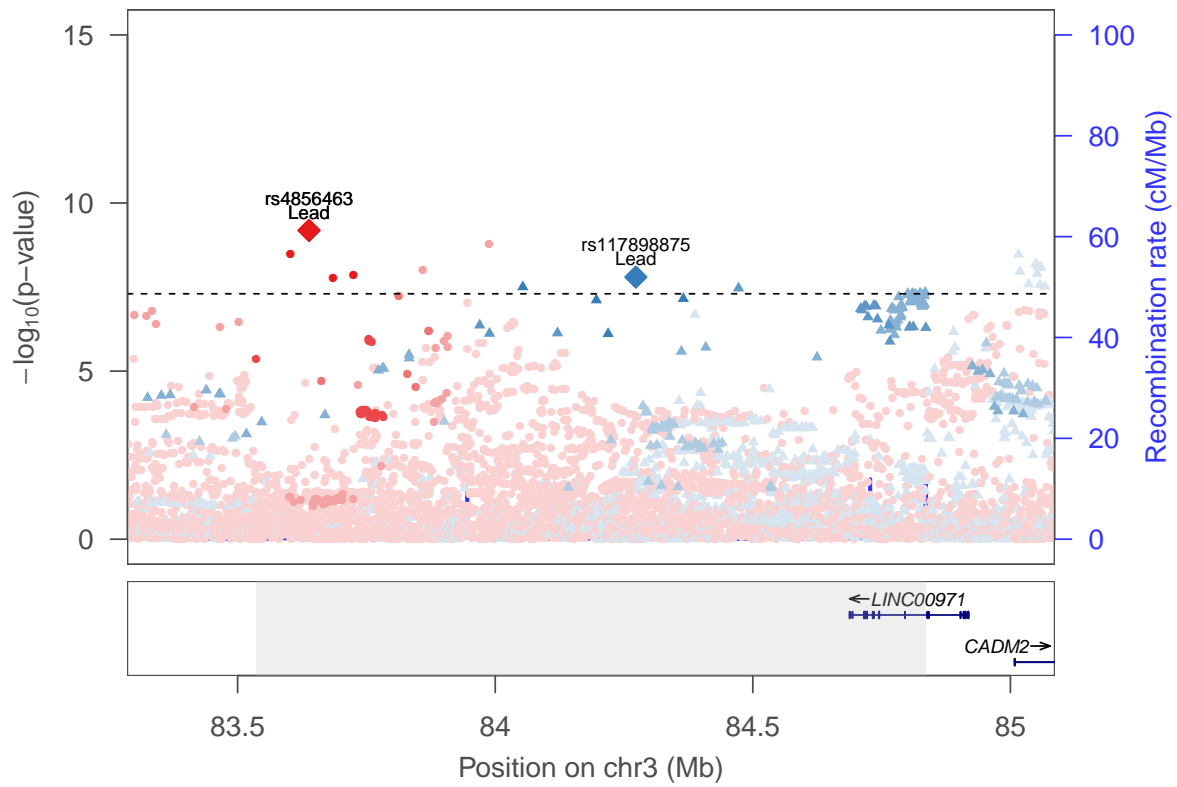

rs117898875 ▲  
rs4856463 ●

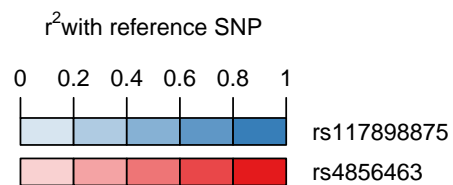

# Ever smoker: Locus 48 [chr 3: 85.427–86.185Mb]

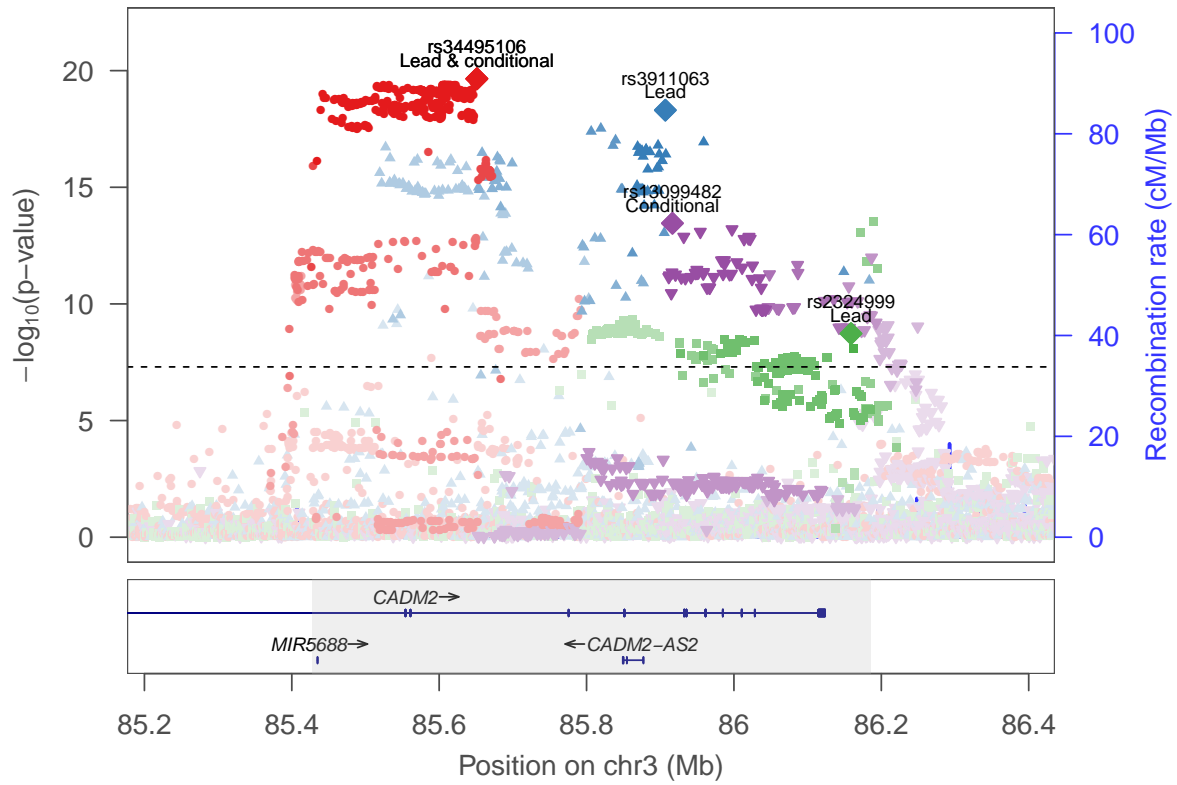

rs13099482    ▾  
 rs2324999    ■  
 rs3911063    ▲  
 rs34495106    ●

$r^2$  with reference SNP

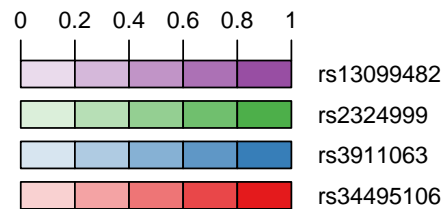

# Ever smoker: locus 49 [chr 3:114.143–114.170Mb]

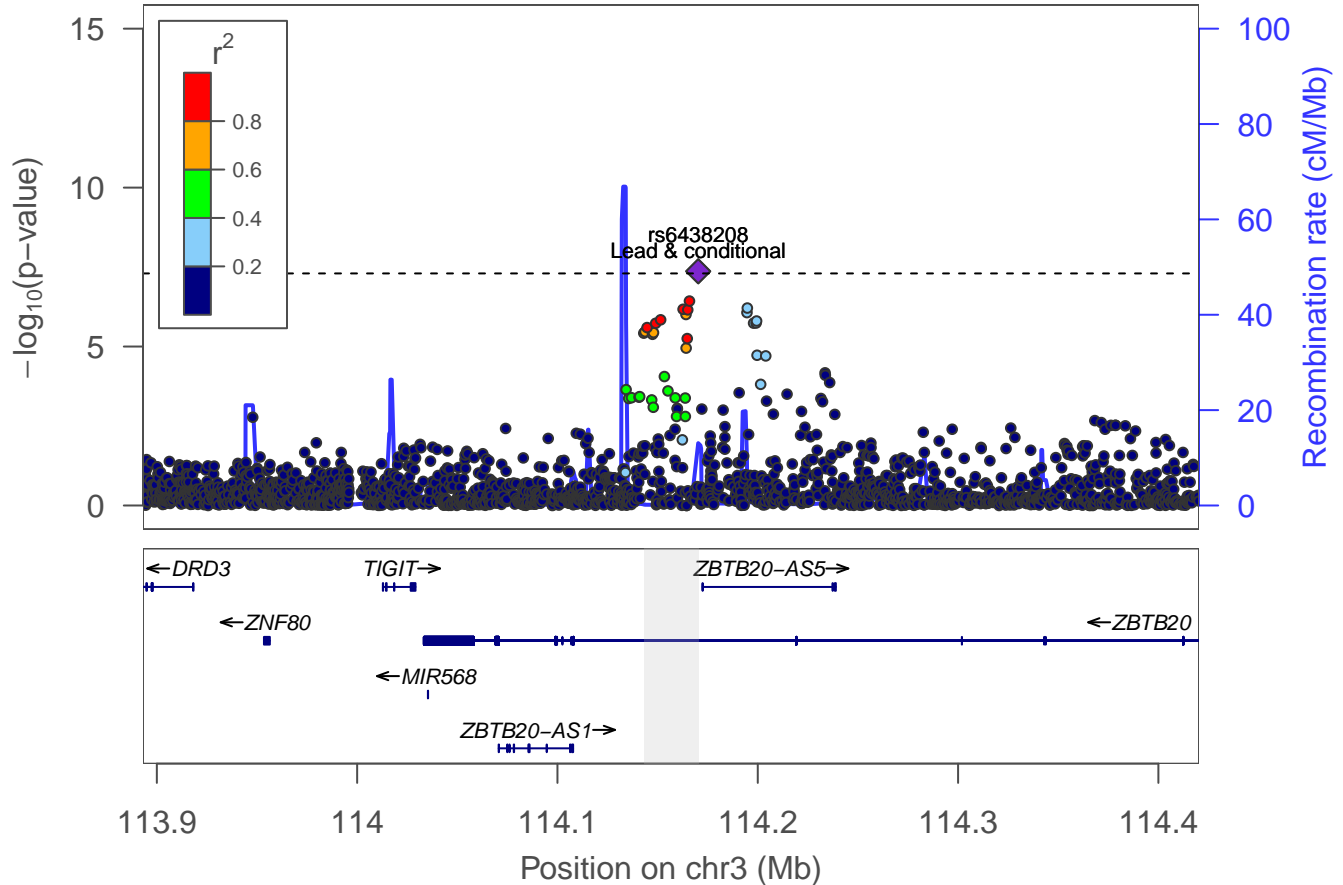

# Ever smoker: Locus 50 [chr 3: 117.498–117.998Mb]

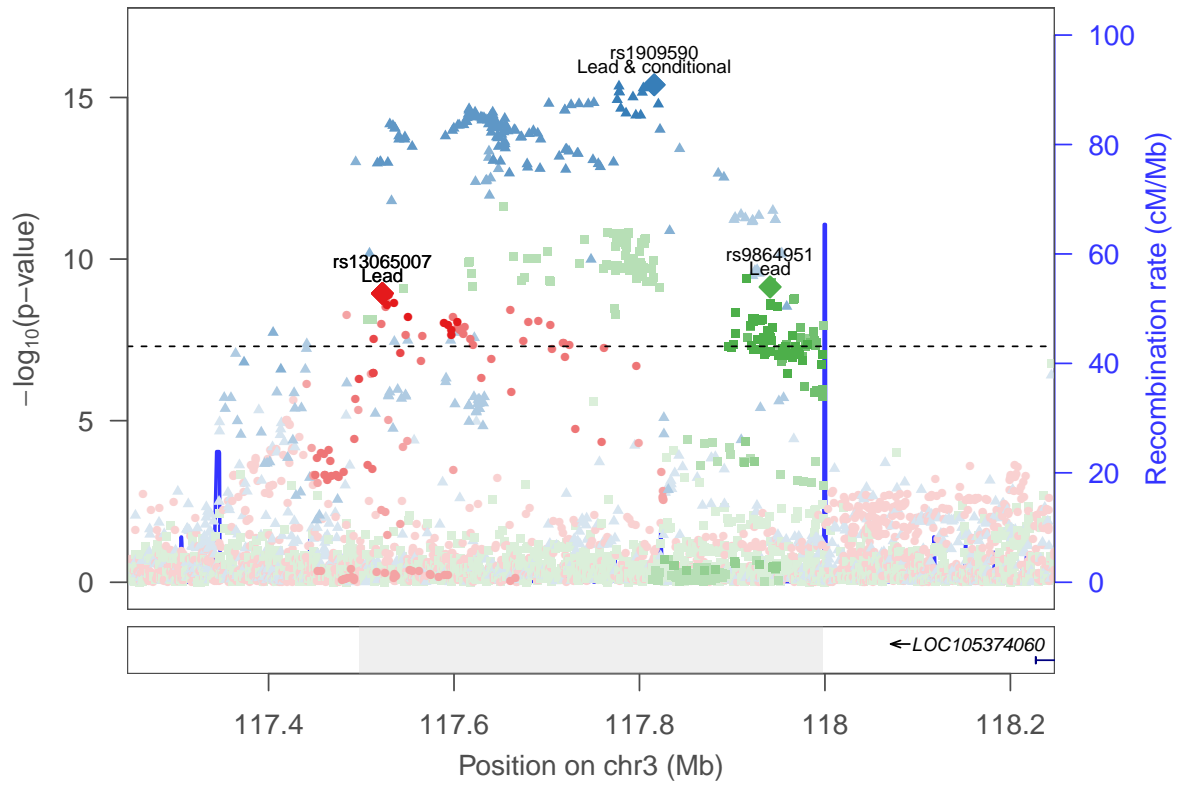

rs9864951 ■  
rs1909590 ▲  
rs13065007 ●

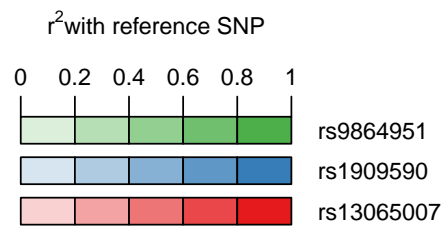

# Ever smoker: locus 51 [chr 3:118.302–118.402Mb]

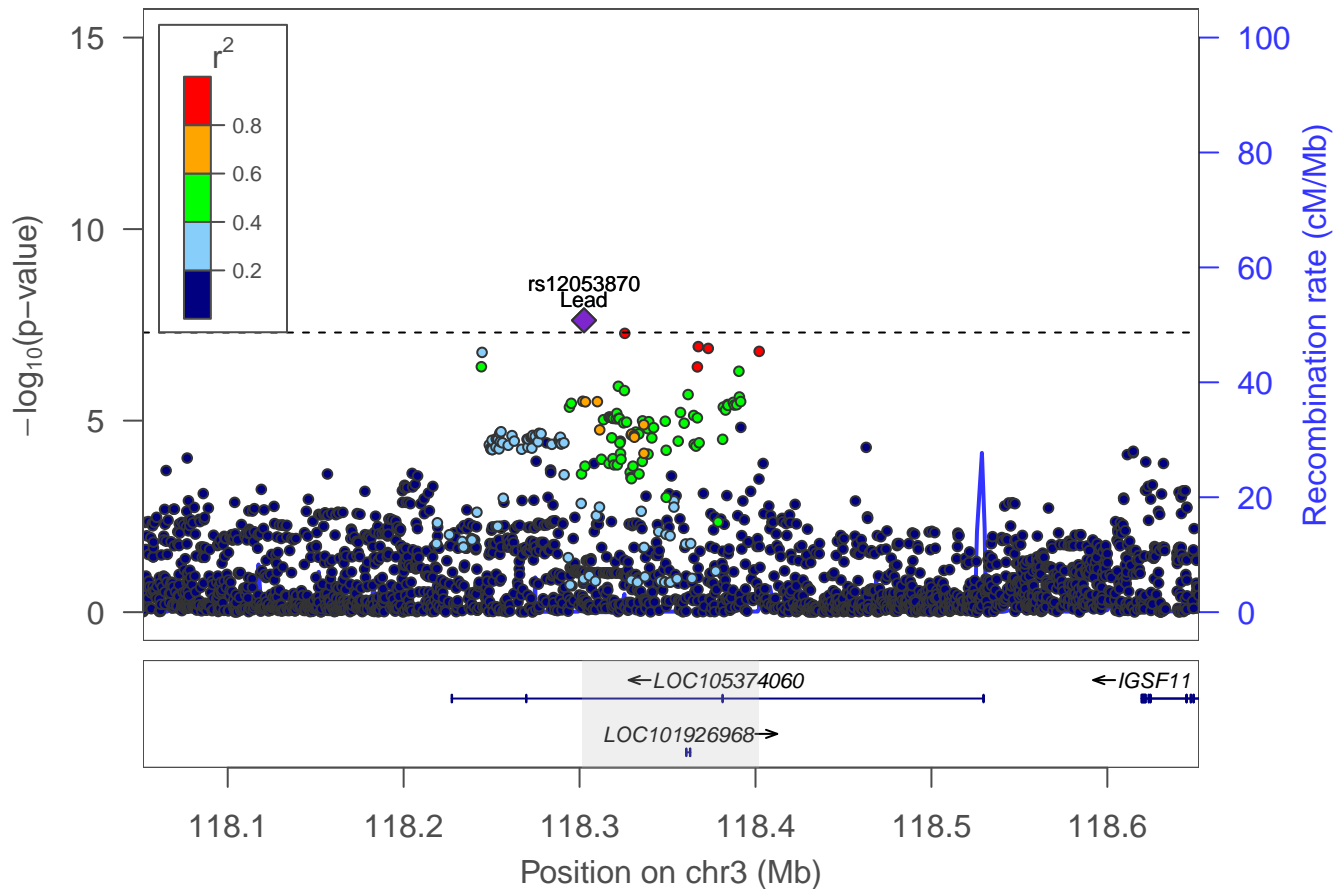



# Ever smoker: Locus 52 [chr 3: 157.379–157.412Mb]

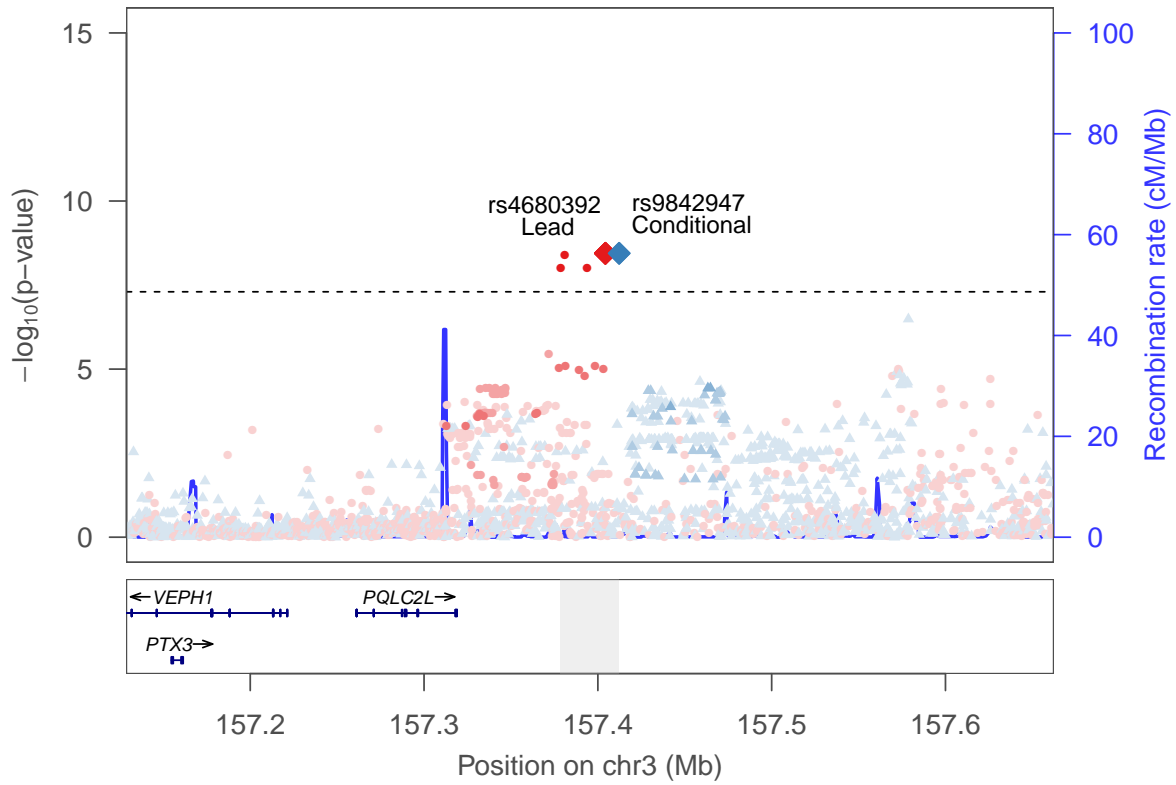

rs9842947 ▲  
rs4680392 ●

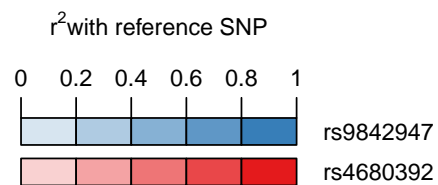

# Ever smoker: locus 53 [chr 4:27.395–27.581Mb]

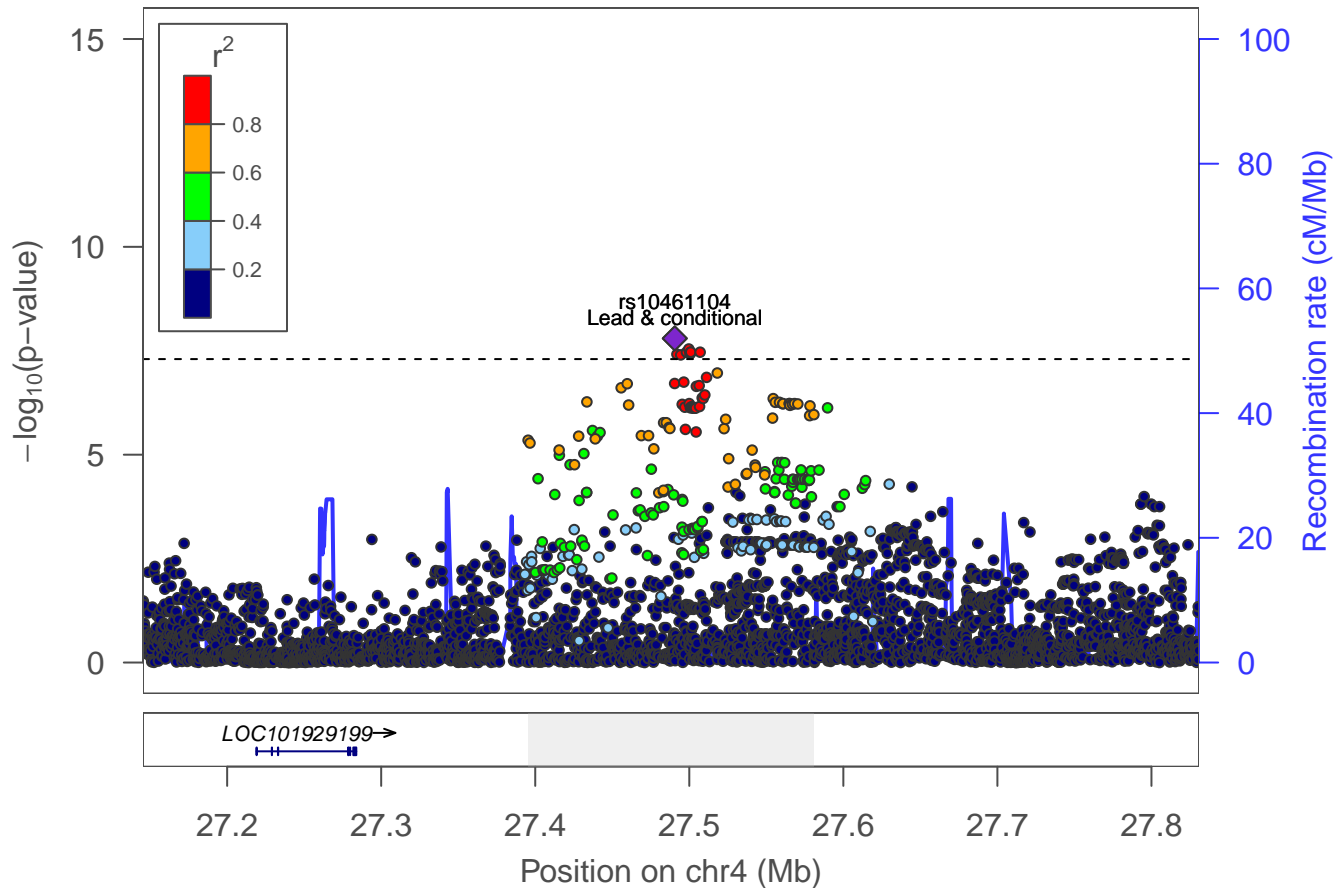

# Ever smoker: locus 54 [chr 4:27.966–28.098Mb]

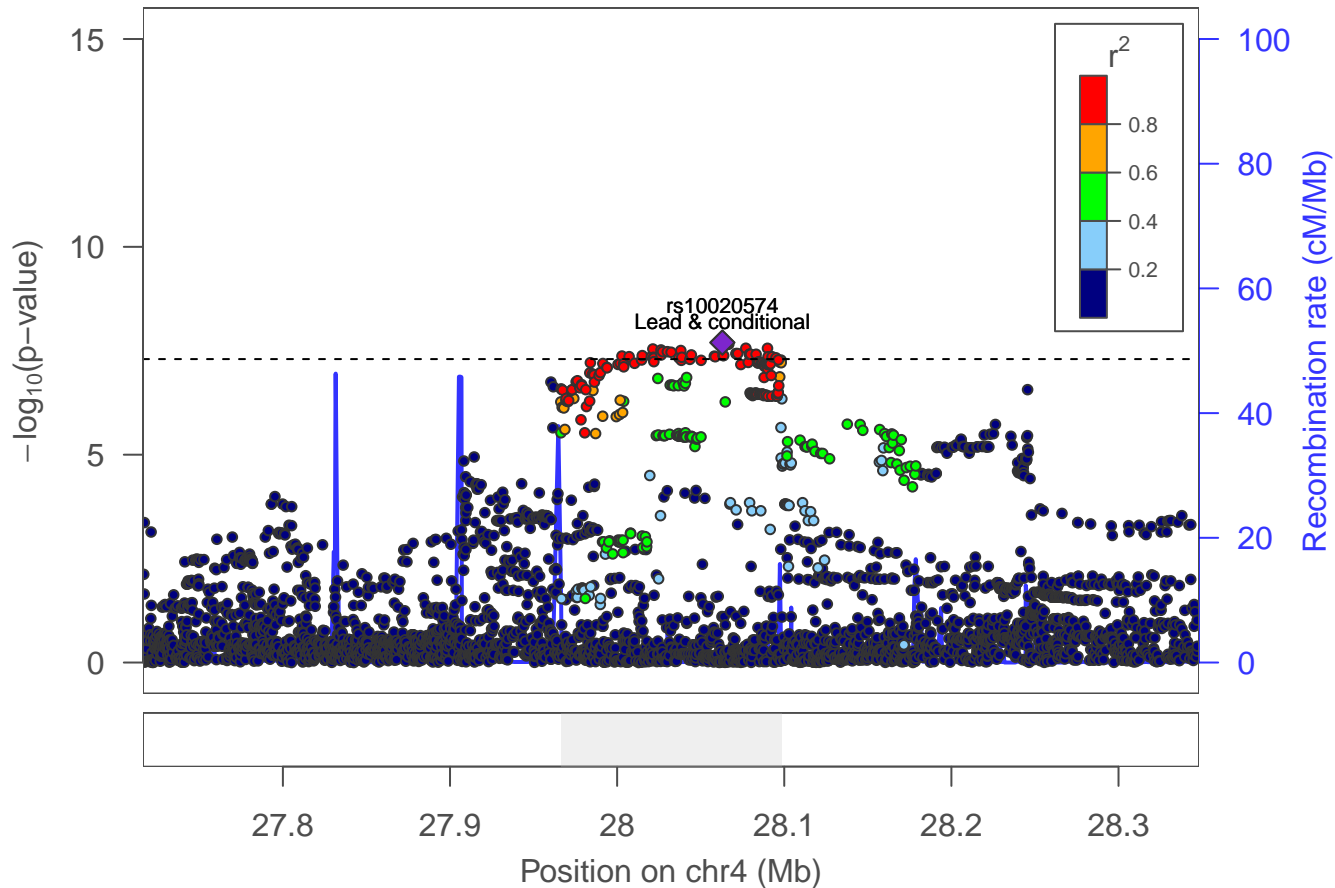

# Ever smoker: locus 55 [chr 4:31.183–31.205Mb]

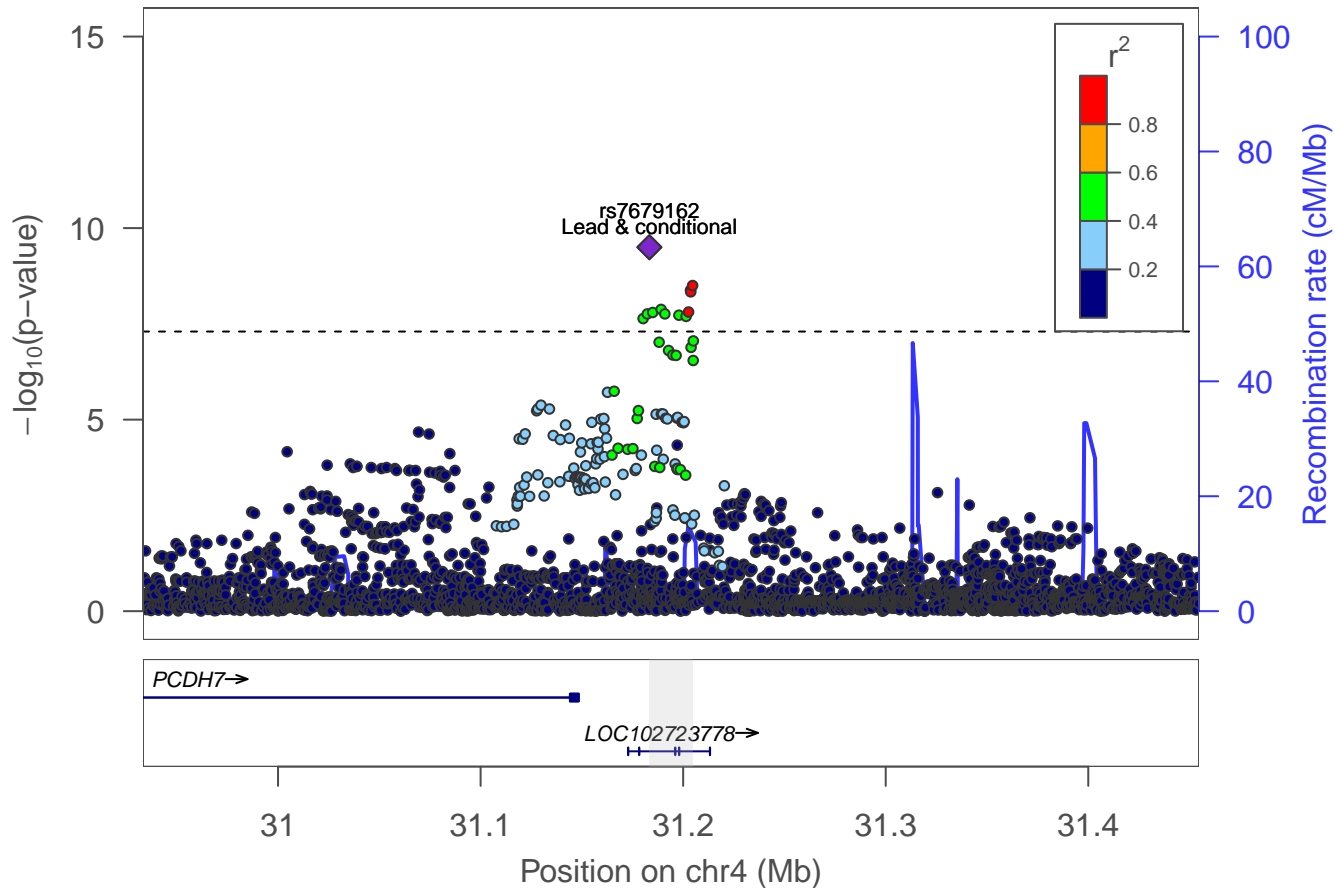

# Ever smoker: locus 56 [chr 4:35.414–35.653Mb]

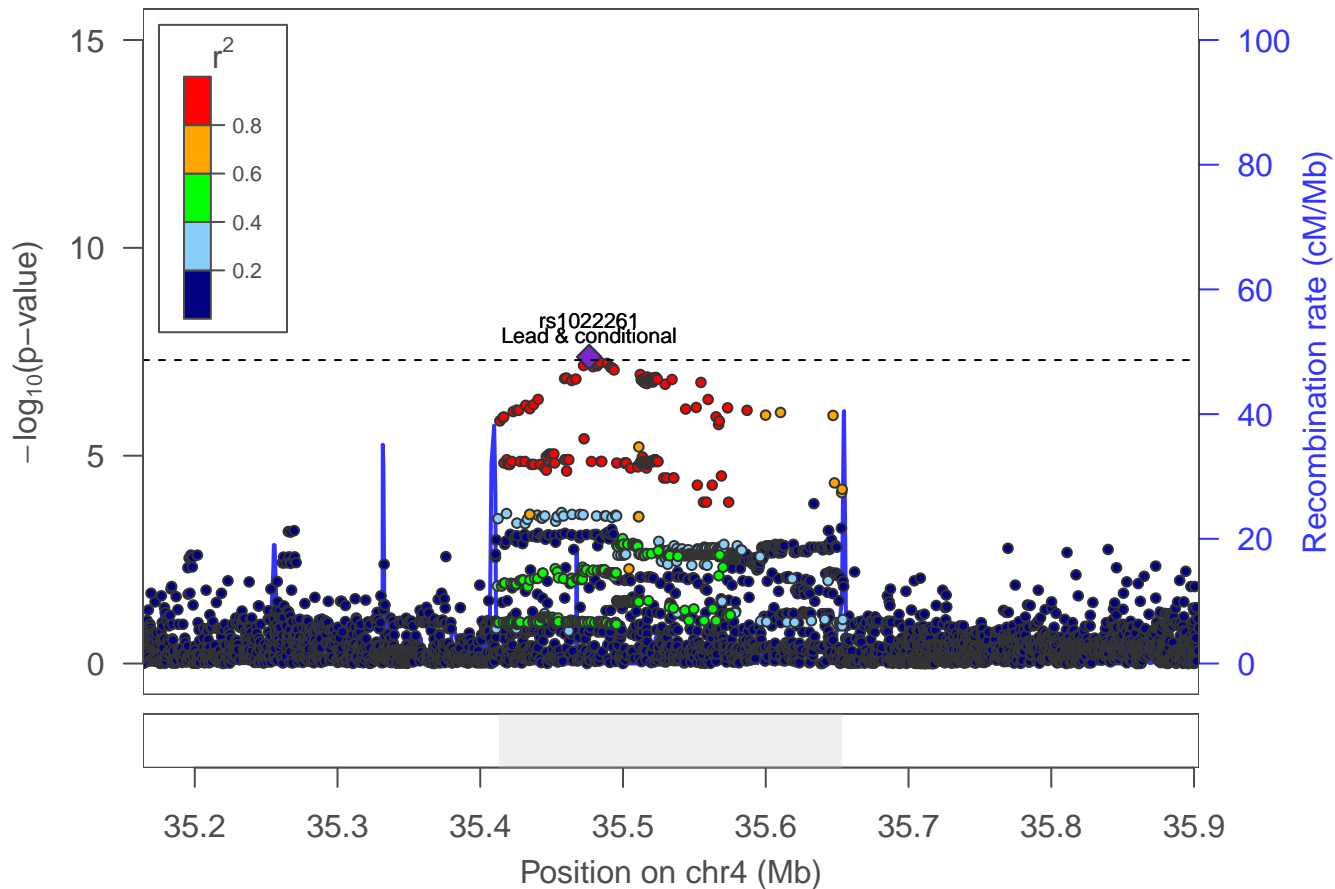

# Ever smoker: locus 57 [chr 4:80.323–80.353Mb]

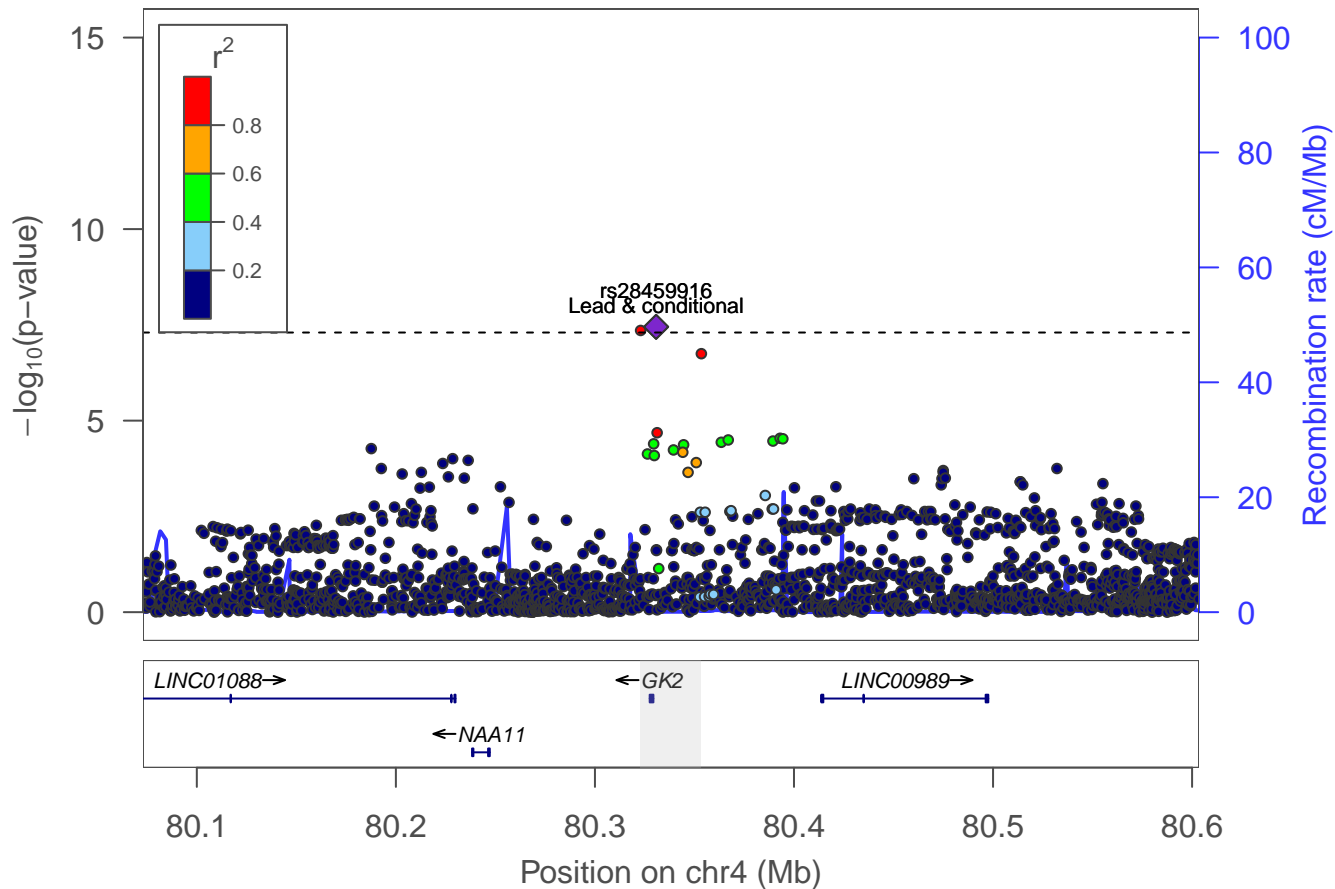

# Ever smoker: locus 58 [chr 4:112.372–112.504Mb]

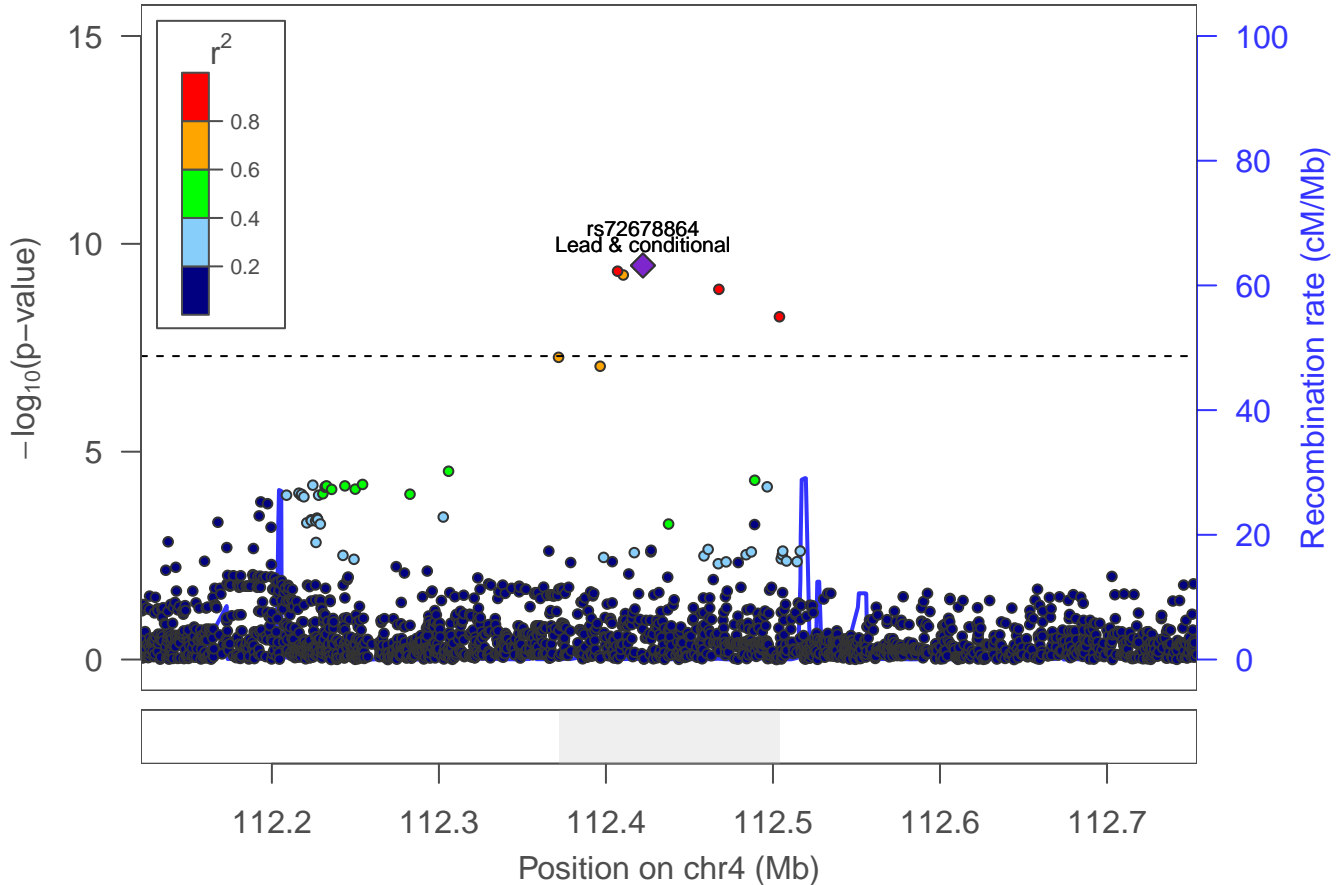

# Ever smoker: Locus 59 [chr 4: 140.859–140.972Mb]

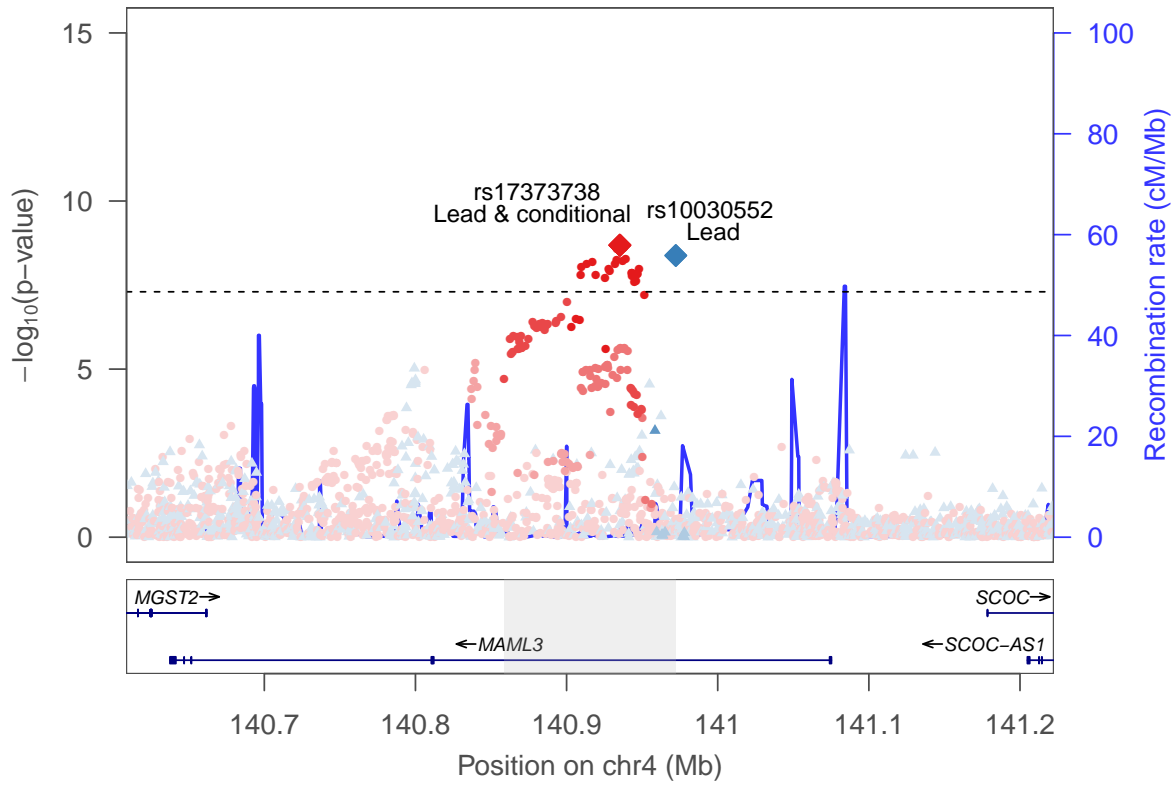

rs10030552 ▲  
rs17373738 ●

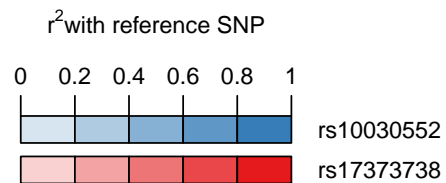



# Ever smoker: locus 60 [chr 4:147.714–147.968Mb]

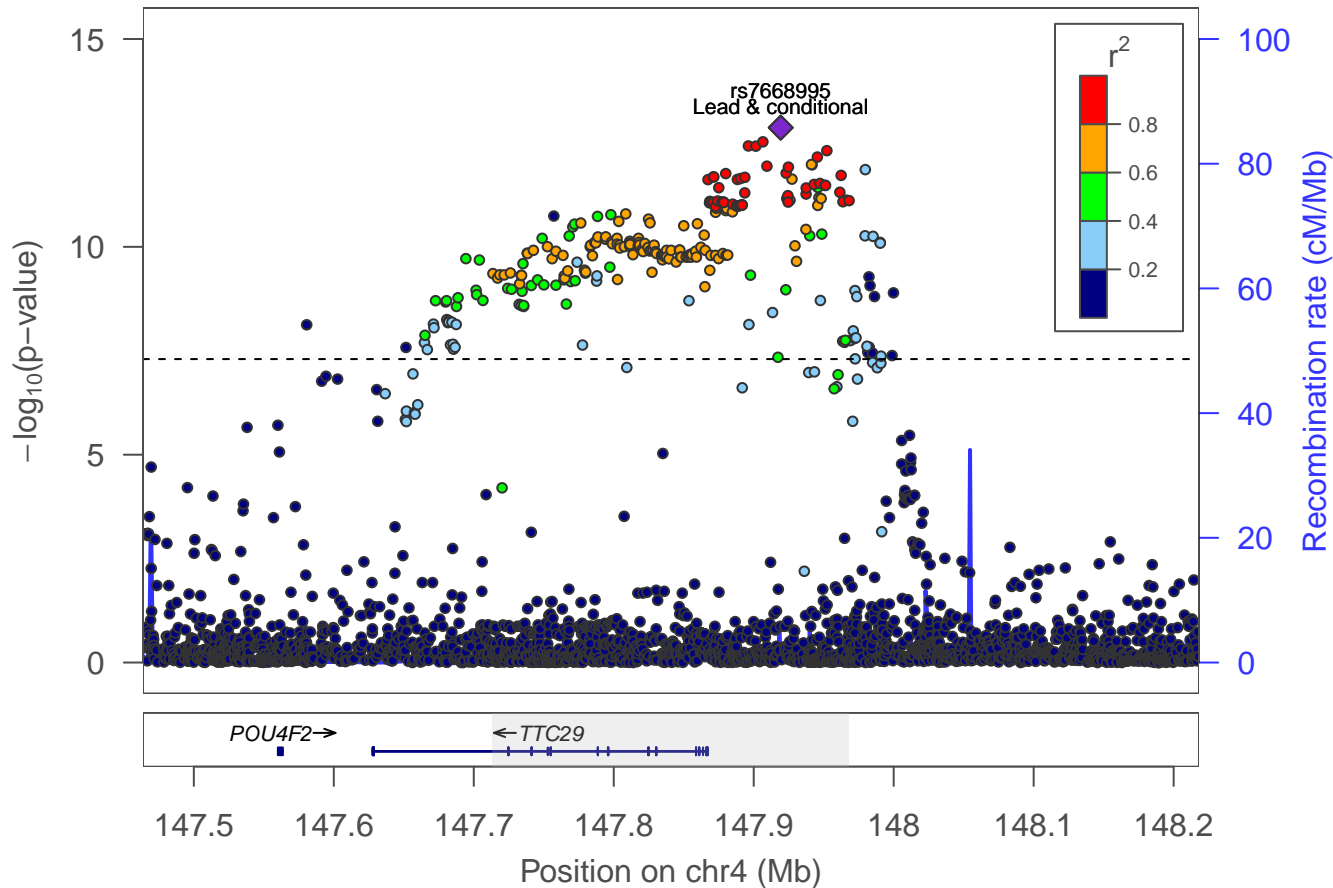

# Ever smoker: locus 61 [chr 4:173.019–173.128Mb]

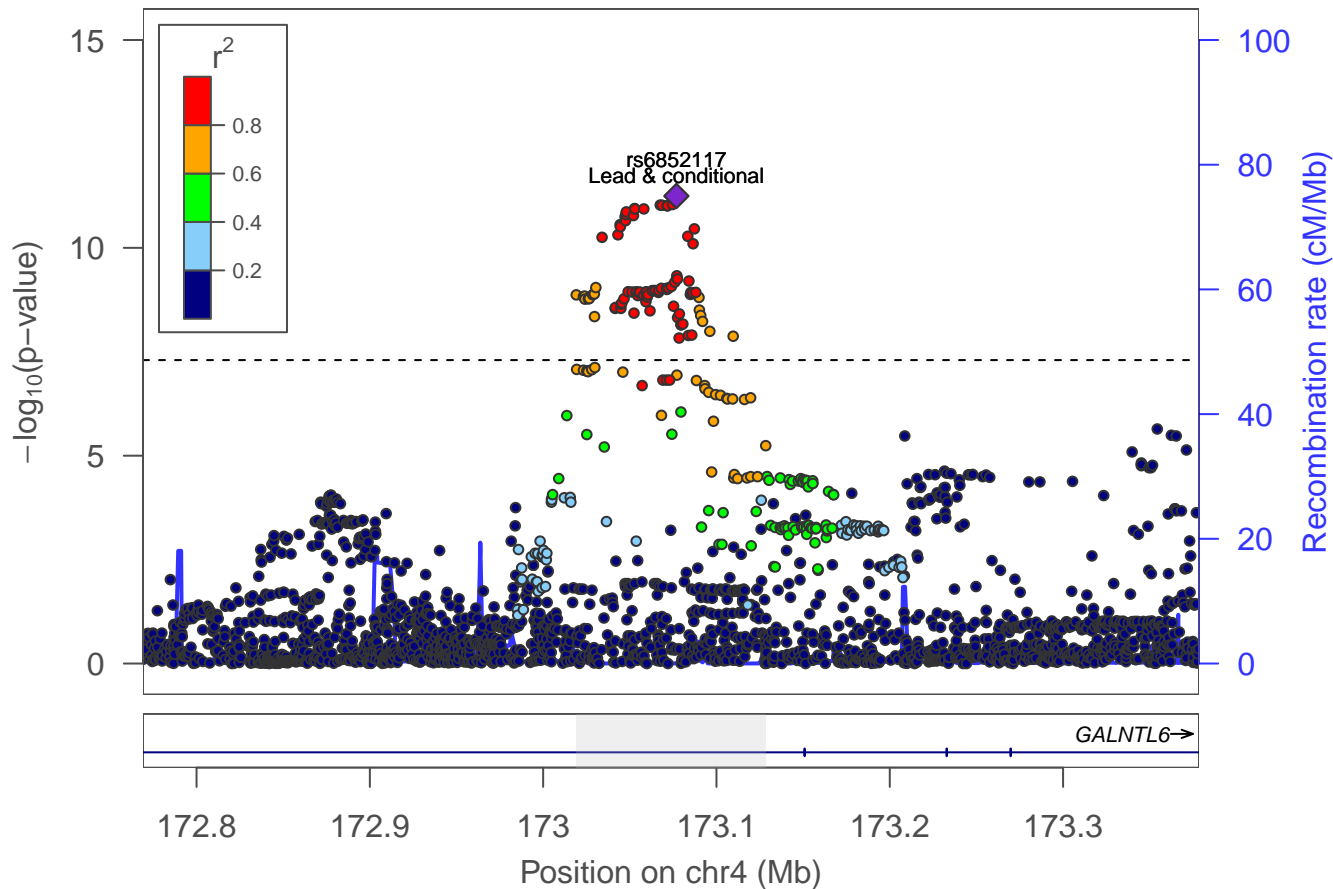

# Ever smoker: locus 62 [chr 5:30.813–30.844Mb]

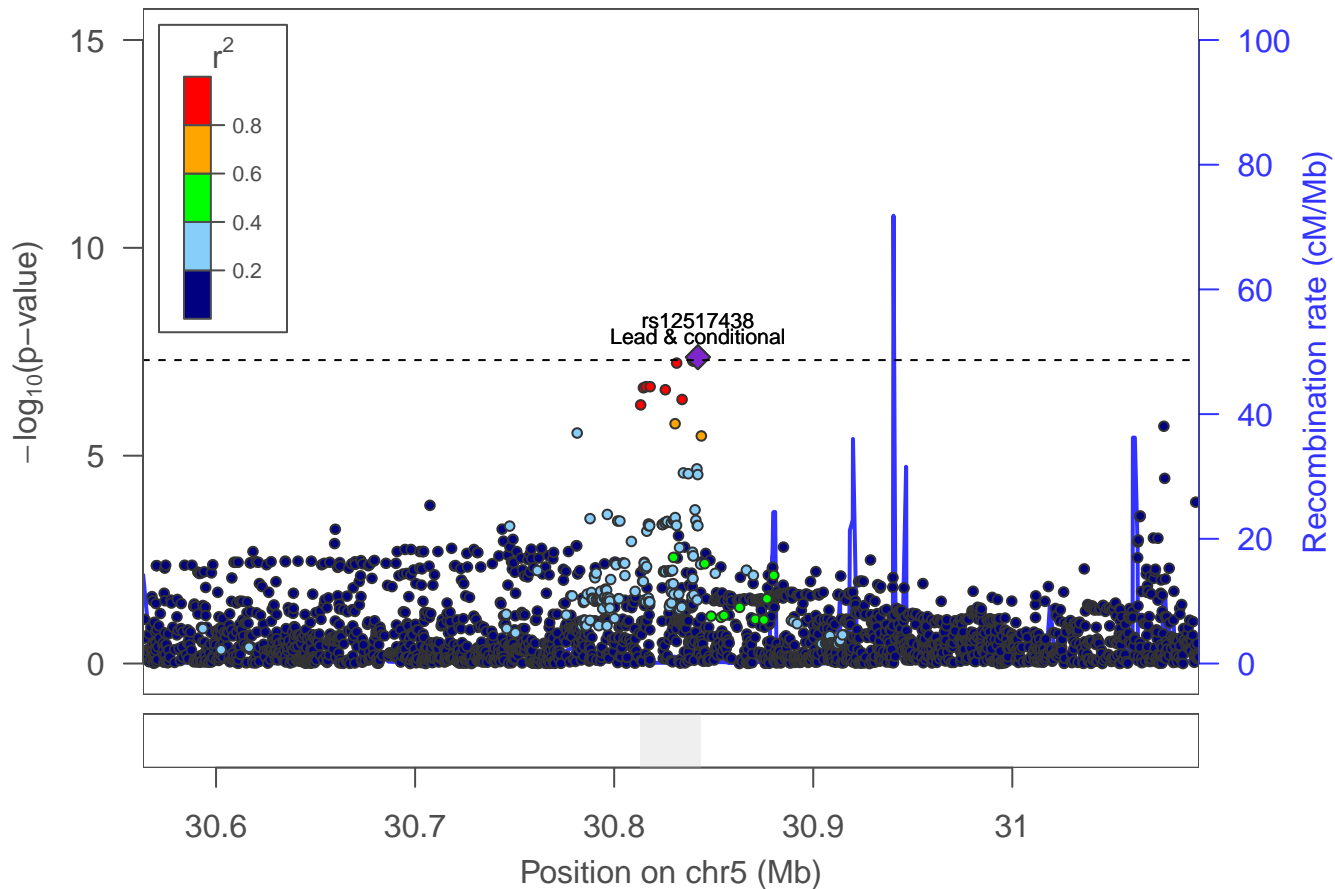

# Ever smoker: locus 63 [chr 5:50.714–51.122Mb]

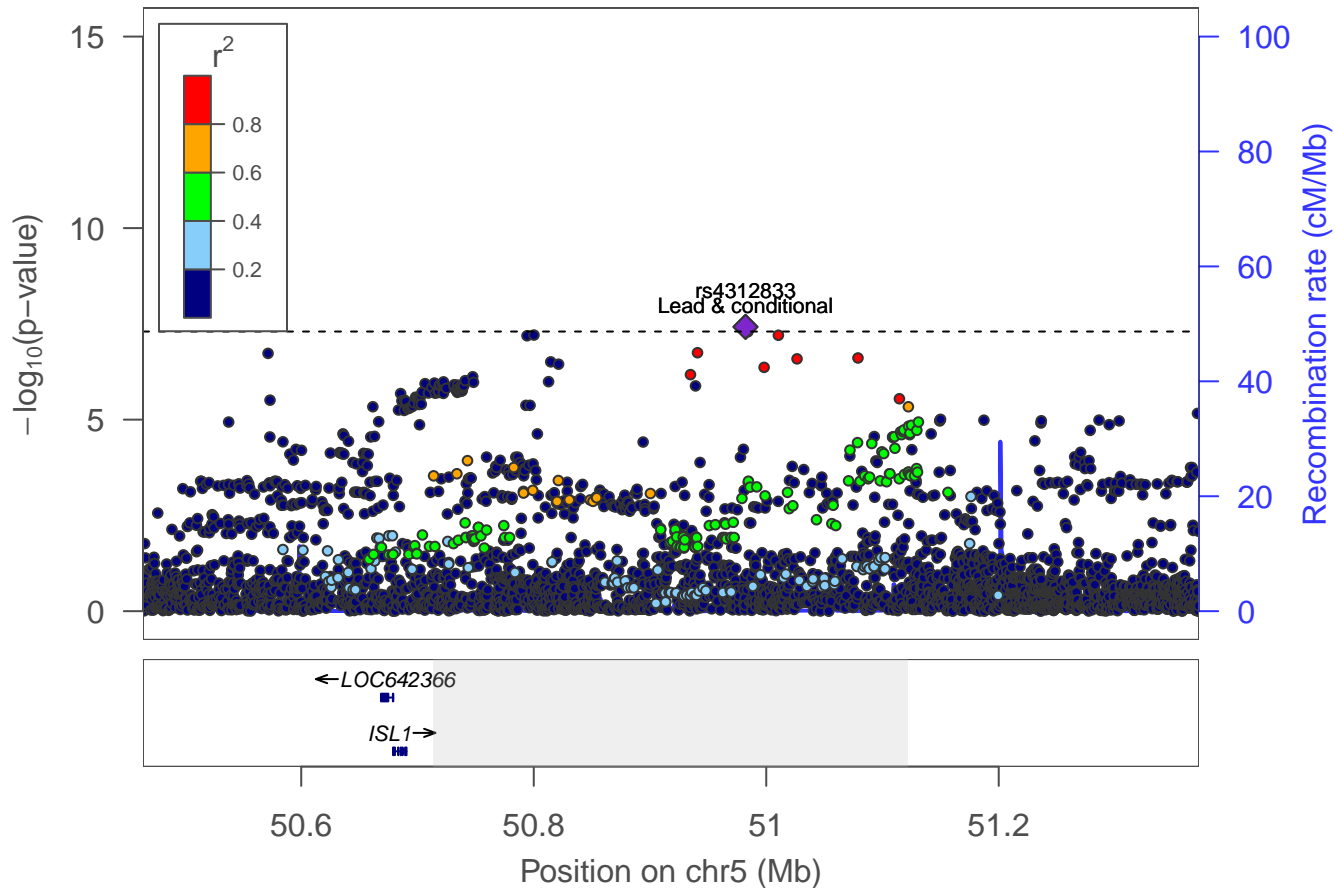

# Ever smoker: locus 64 [chr 5:60.061–60.549Mb]

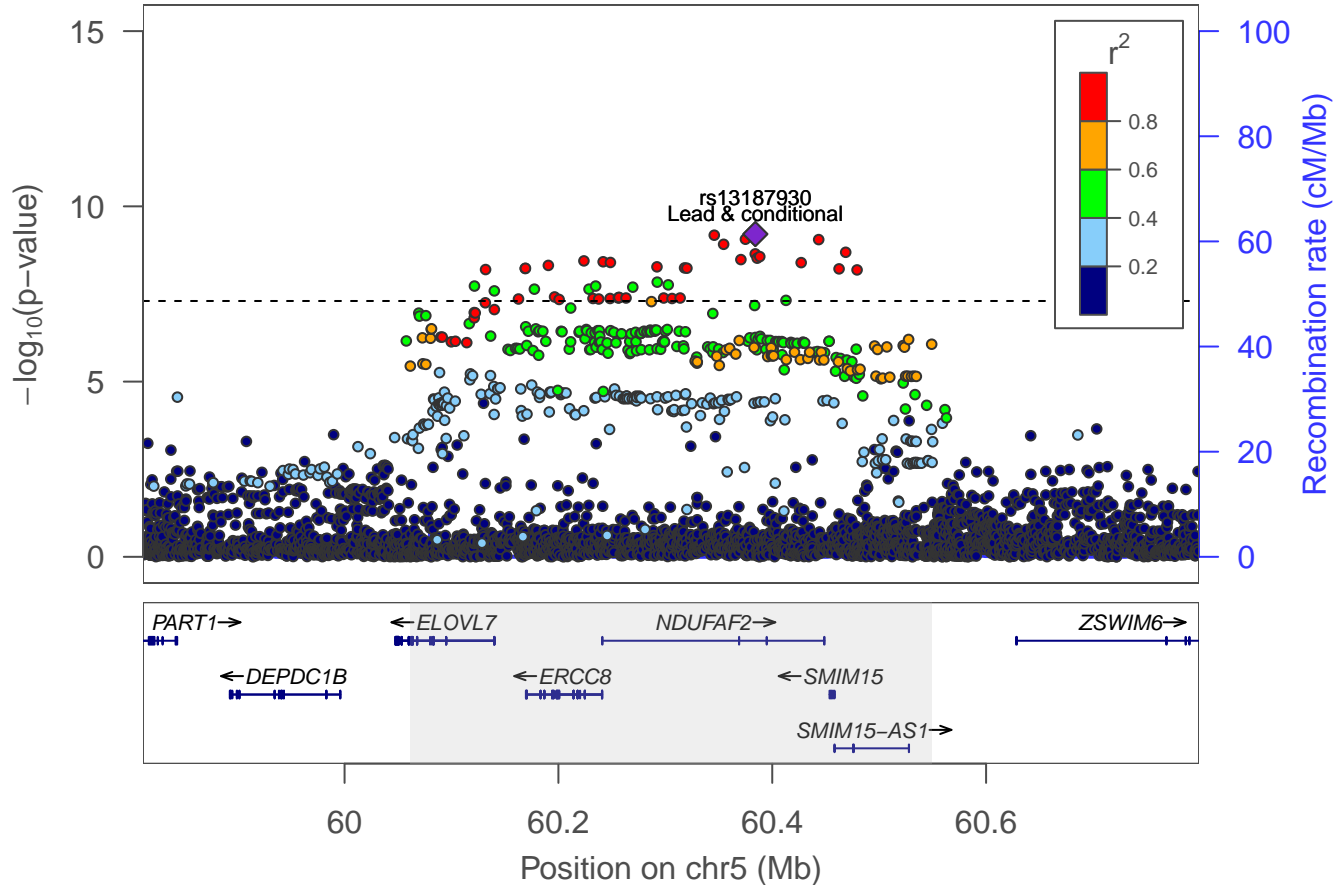

# Ever smoker: locus 65 [chr 5:80.241–80.263Mb]

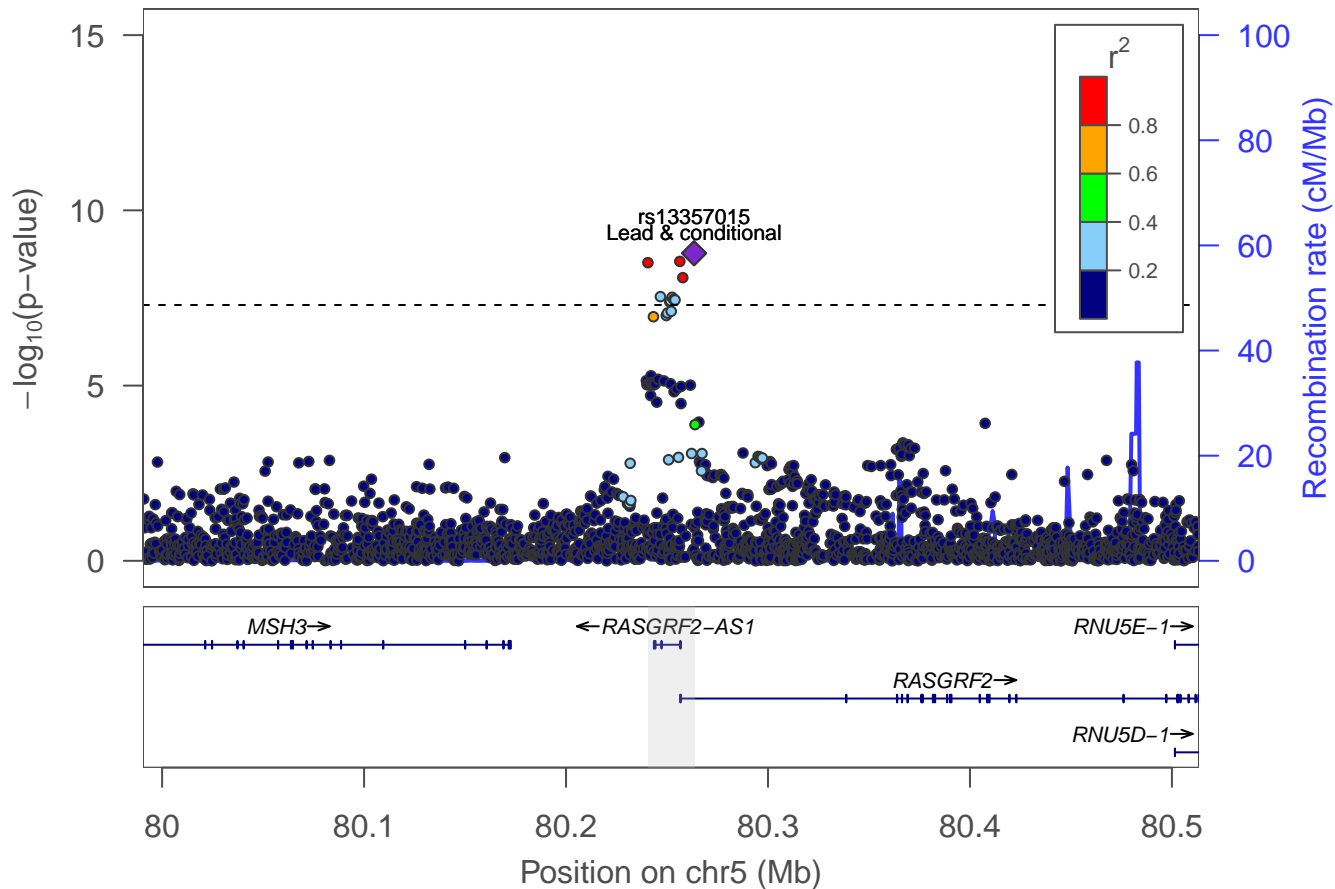

# Ever smoker: locus 66 [chr 5:87.521–87.823Mb]

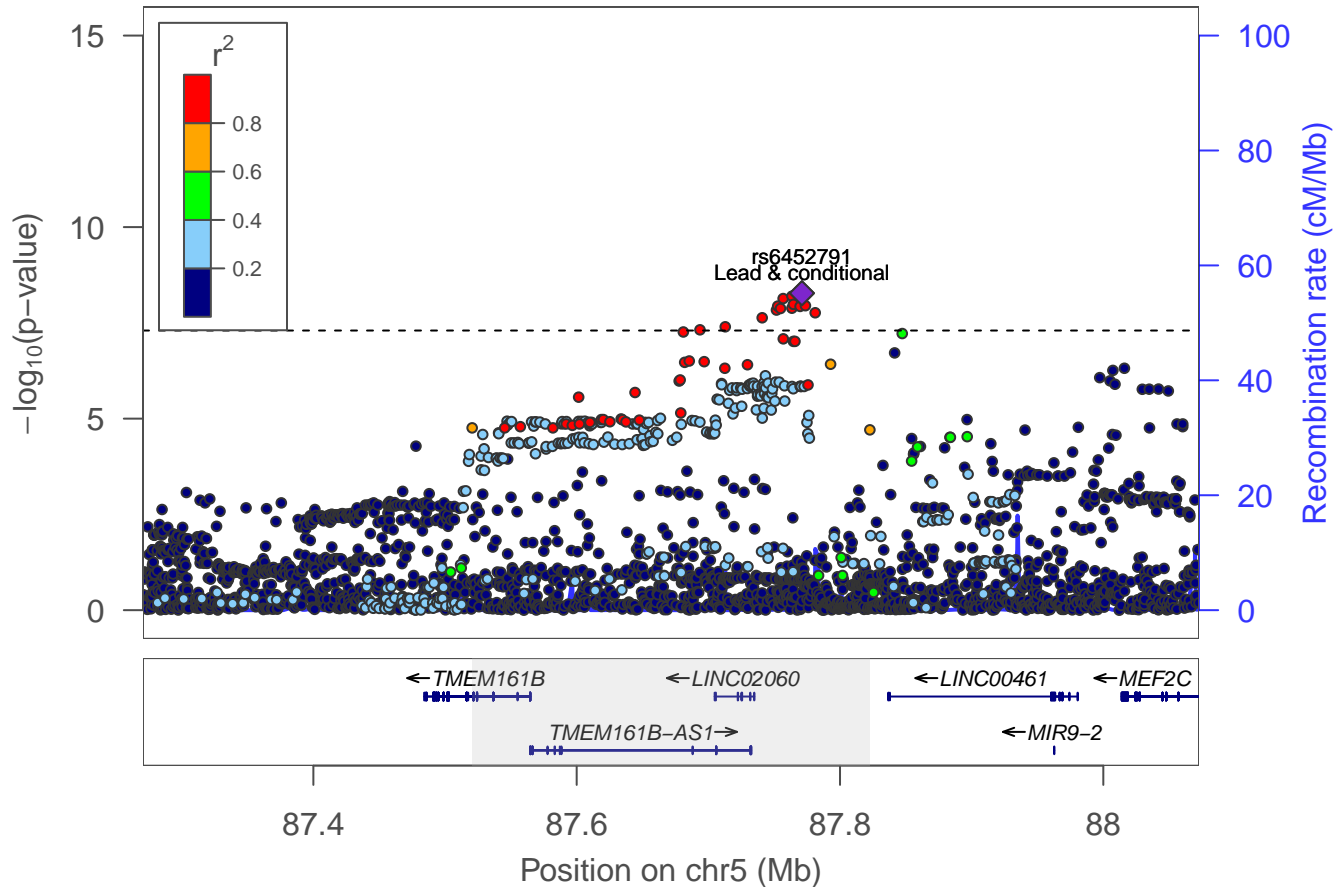

# Ever smoker: locus 67 [chr 5:94.198–94.217Mb]

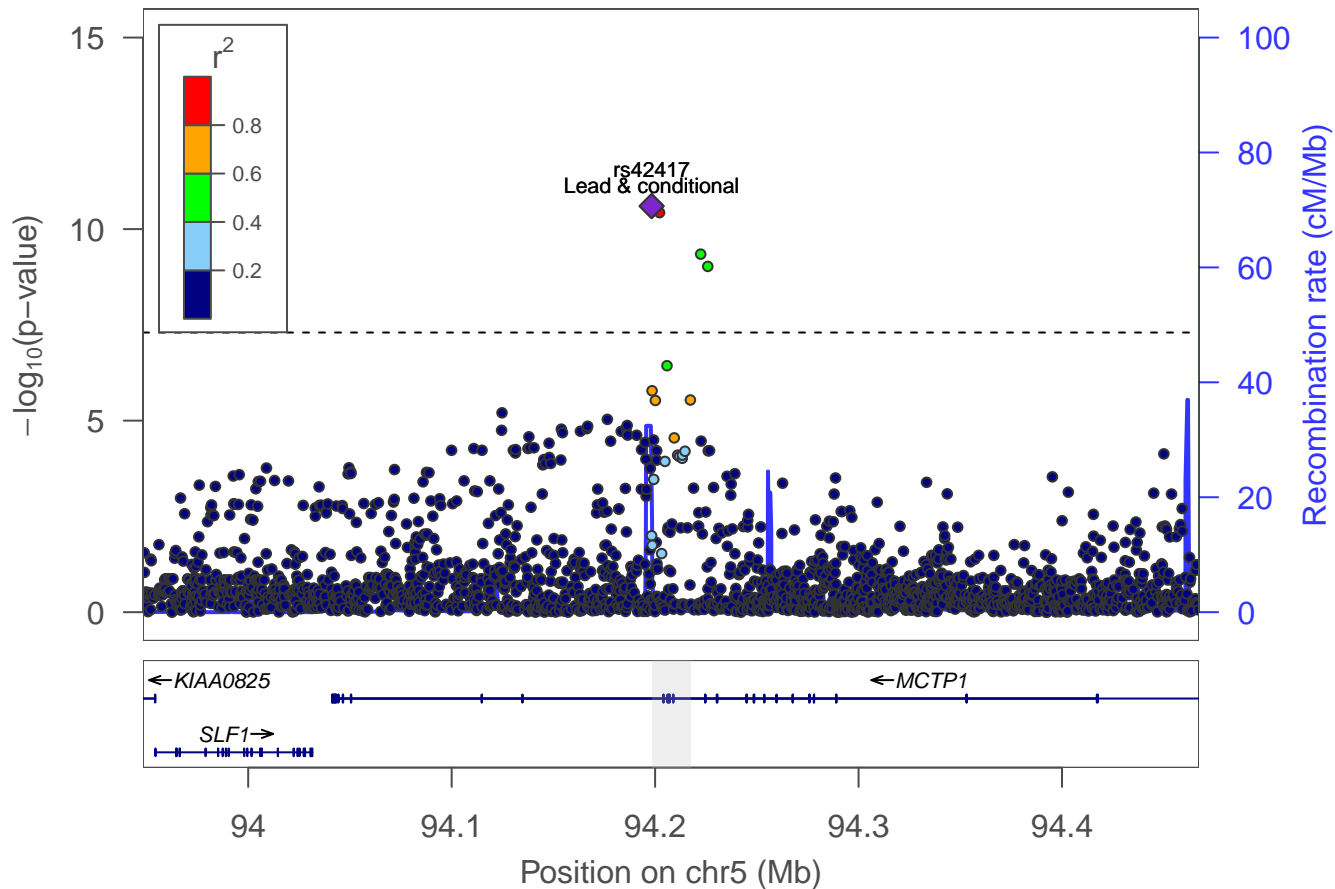



# Ever smoker: locus 68 [chr 5:103.708–104.093Mb]

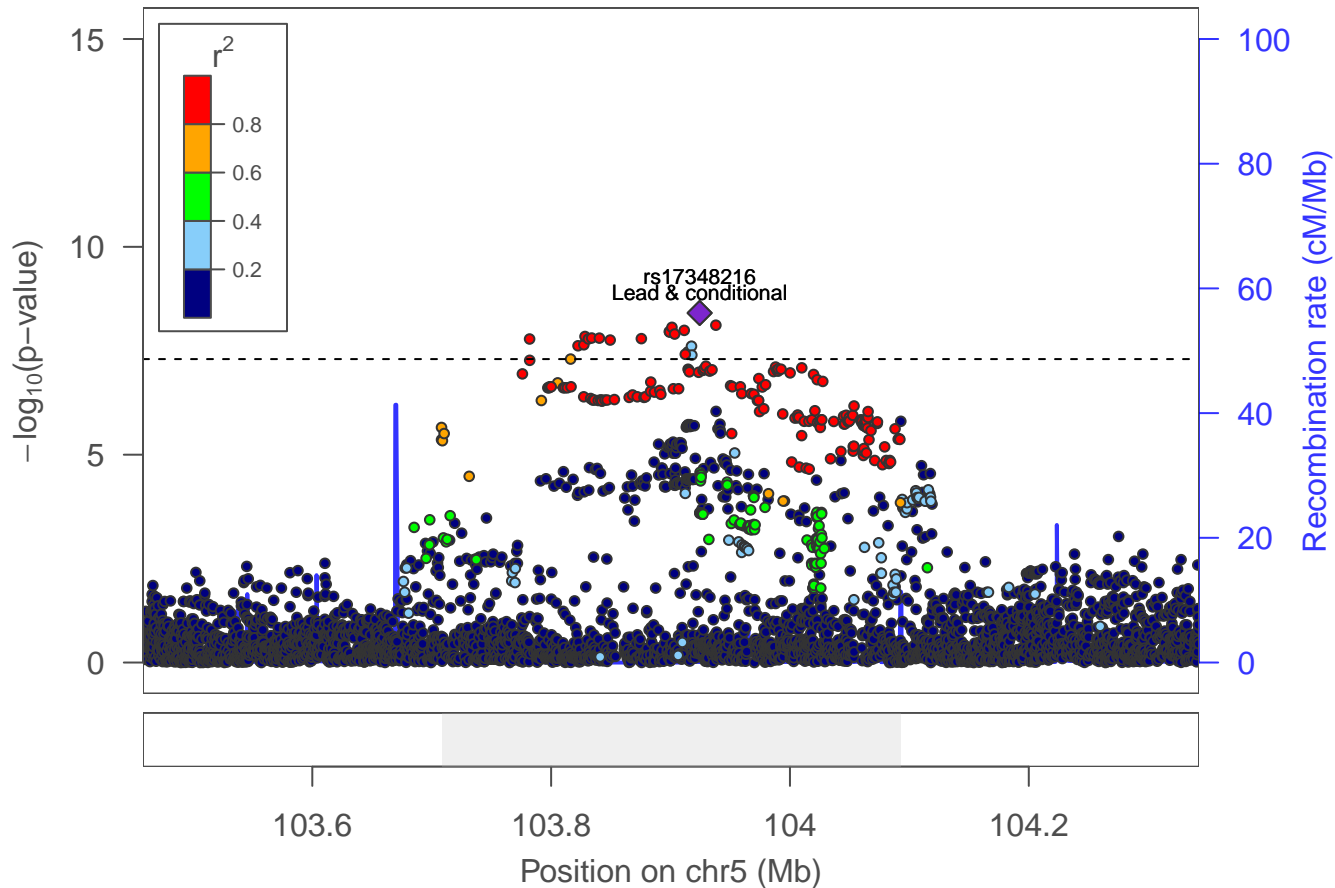

# Ever smoker: locus 69 [chr 5:106.826–106.840Mb]

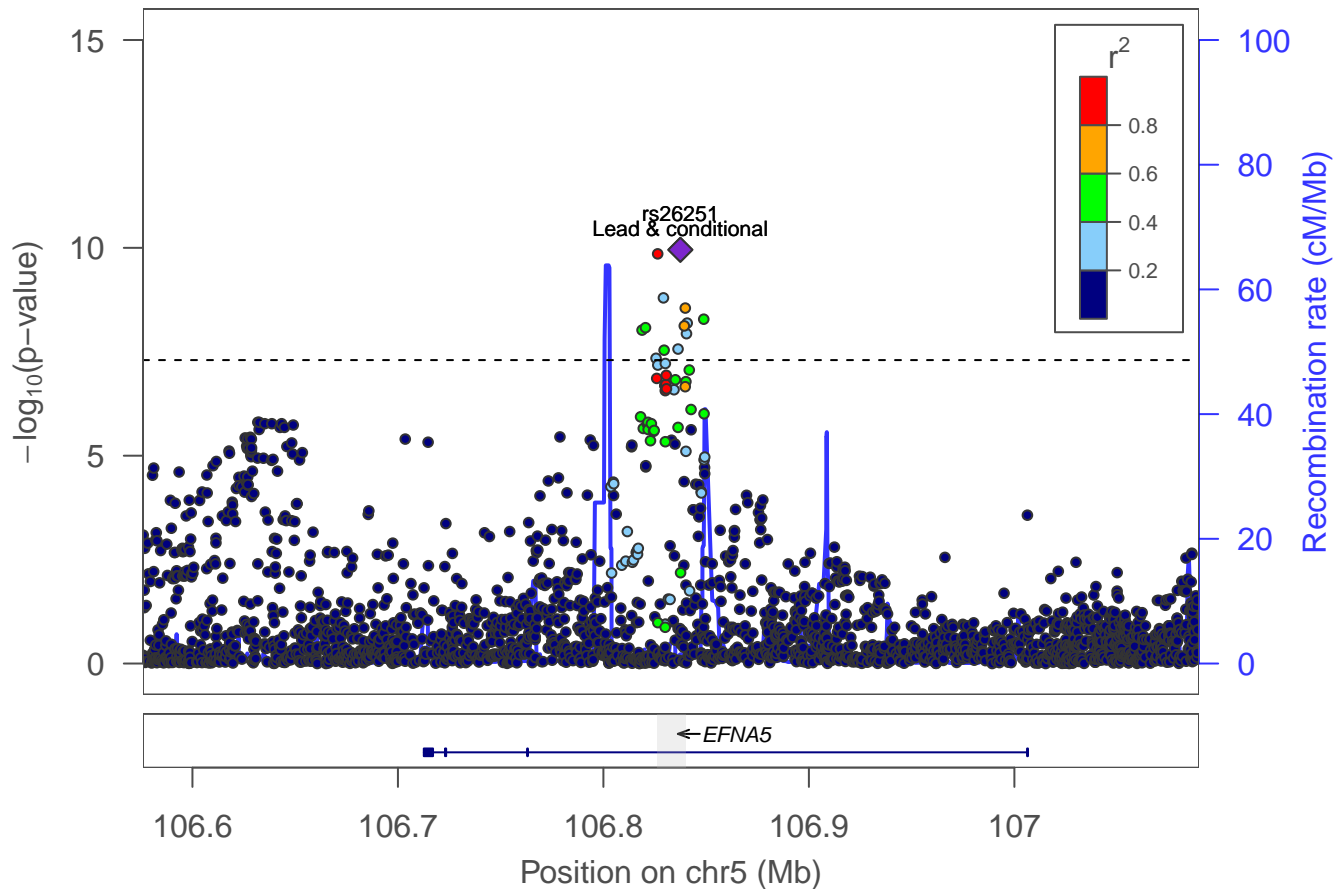

# Ever smoker: locus 70 [chr 5:107.317–107.684Mb]

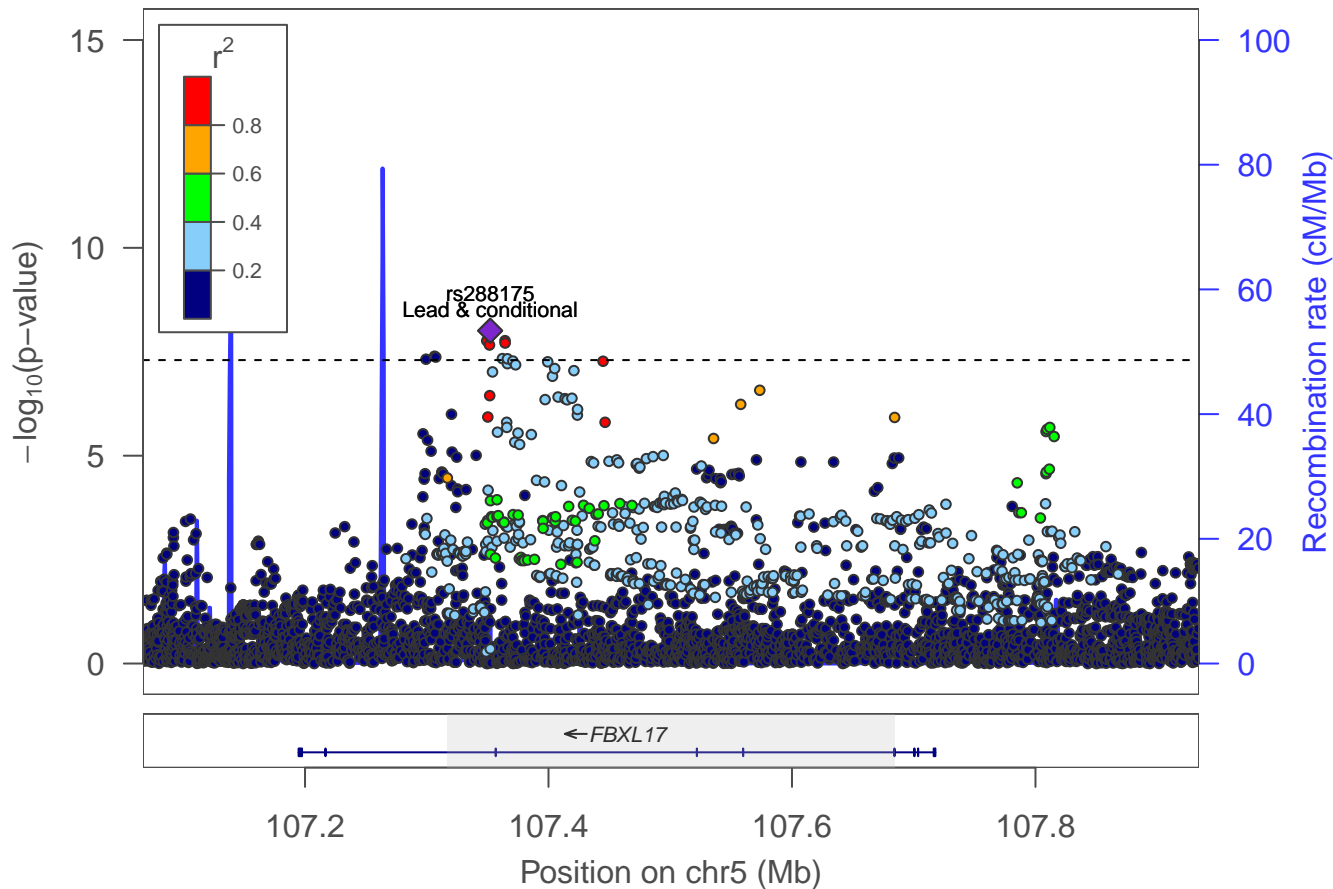

# Ever smoker: Locus 71 [chr 5: 157.718–157.801Mb]

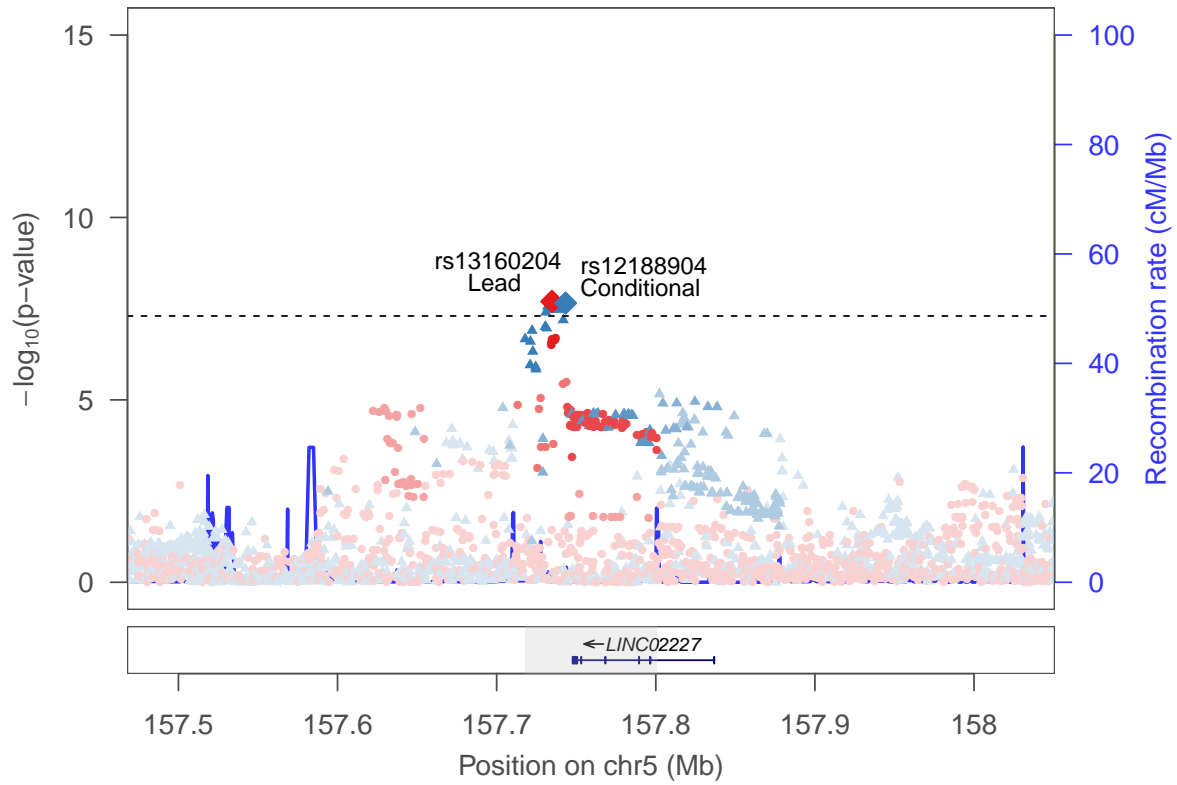

rs12188904 ▲  
rs13160204 ●

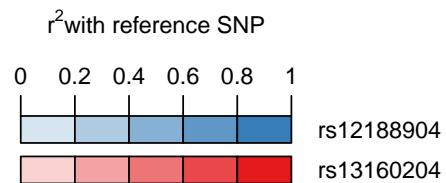

# Ever smoker: locus 72 [chr 5:166.985–167.056Mb]

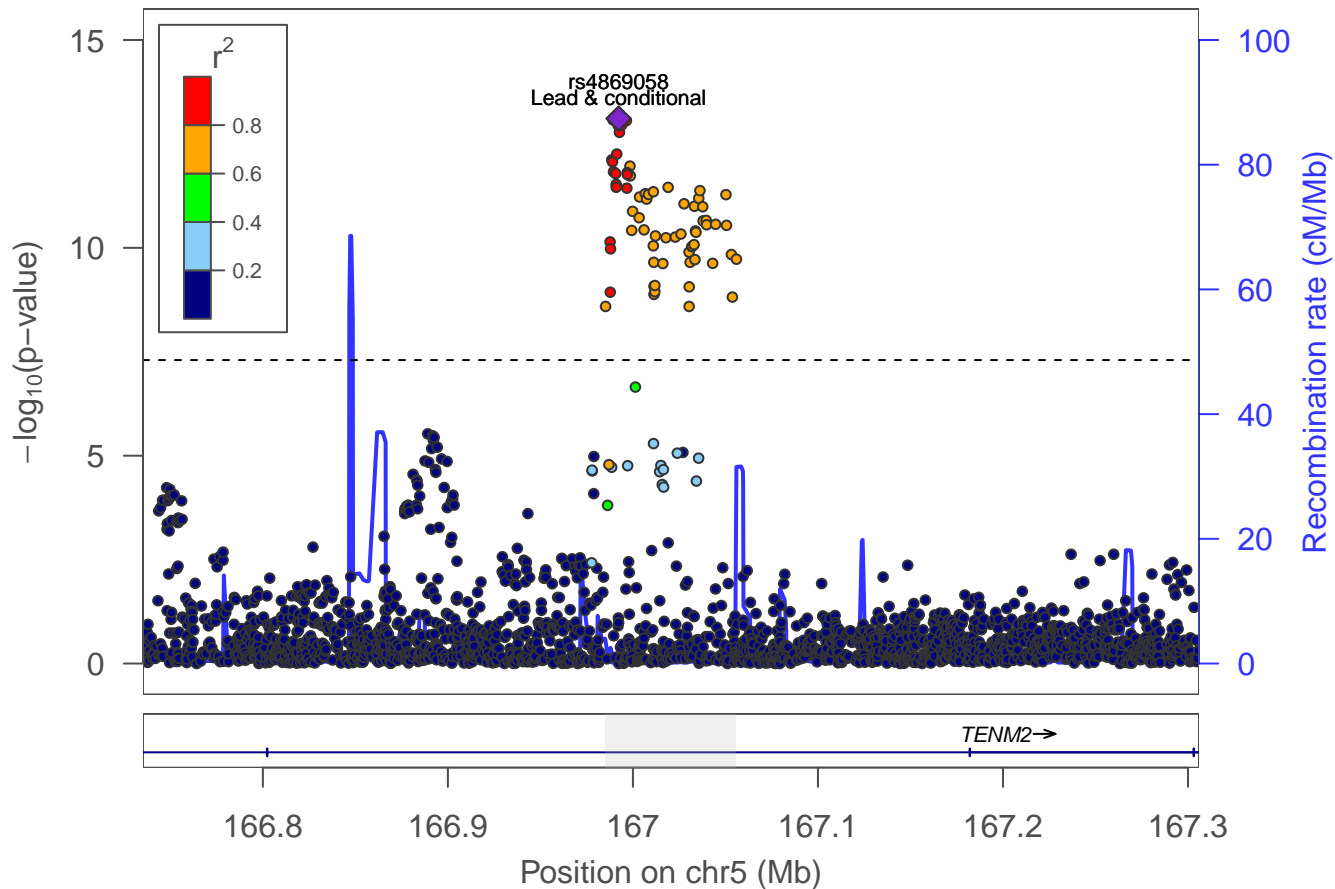

# Ever smoker: locus 73 [chr 5:170.285–170.579Mb]

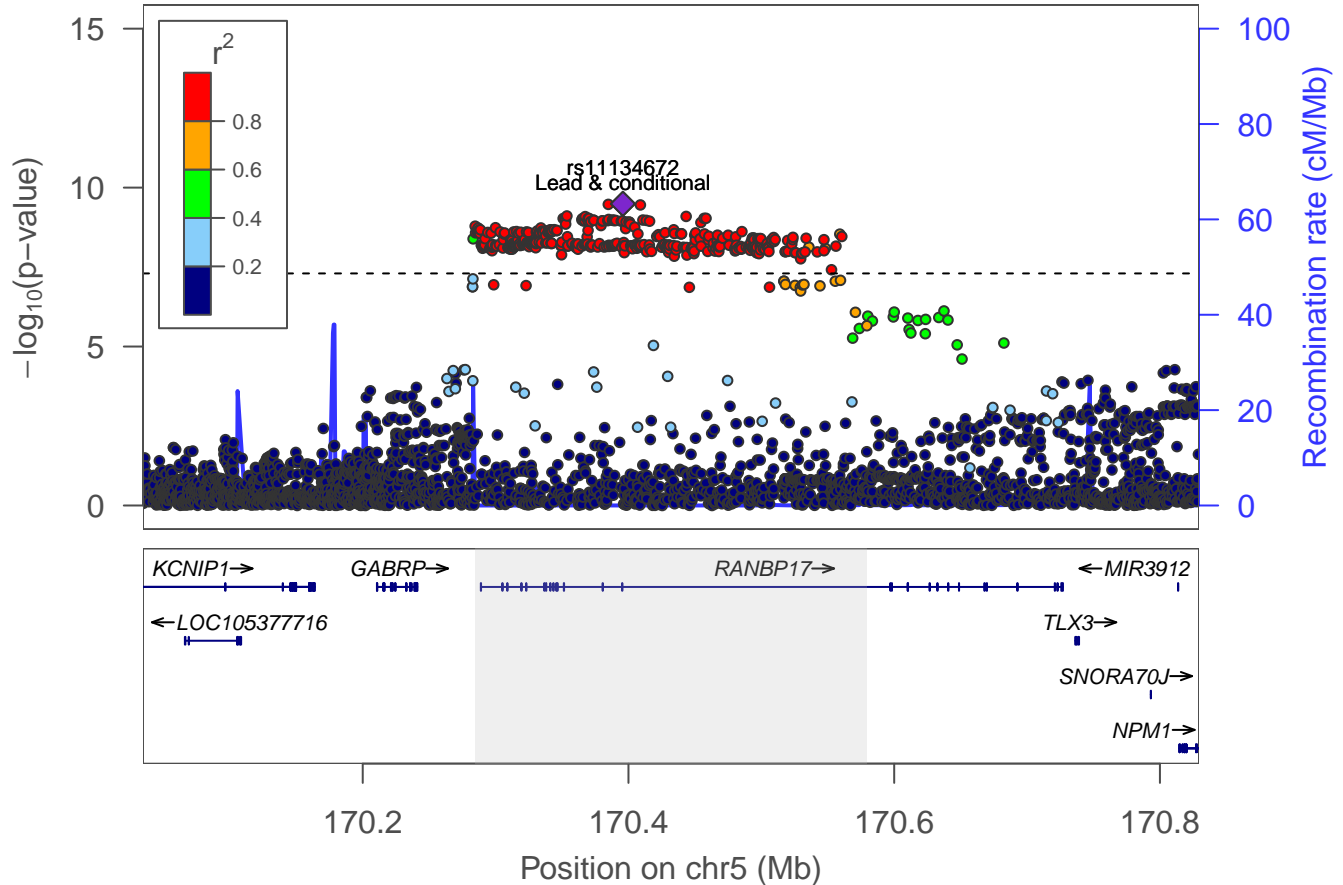

# Ever smoker: locus 74 [chr 6:27.895–28.412Mb]

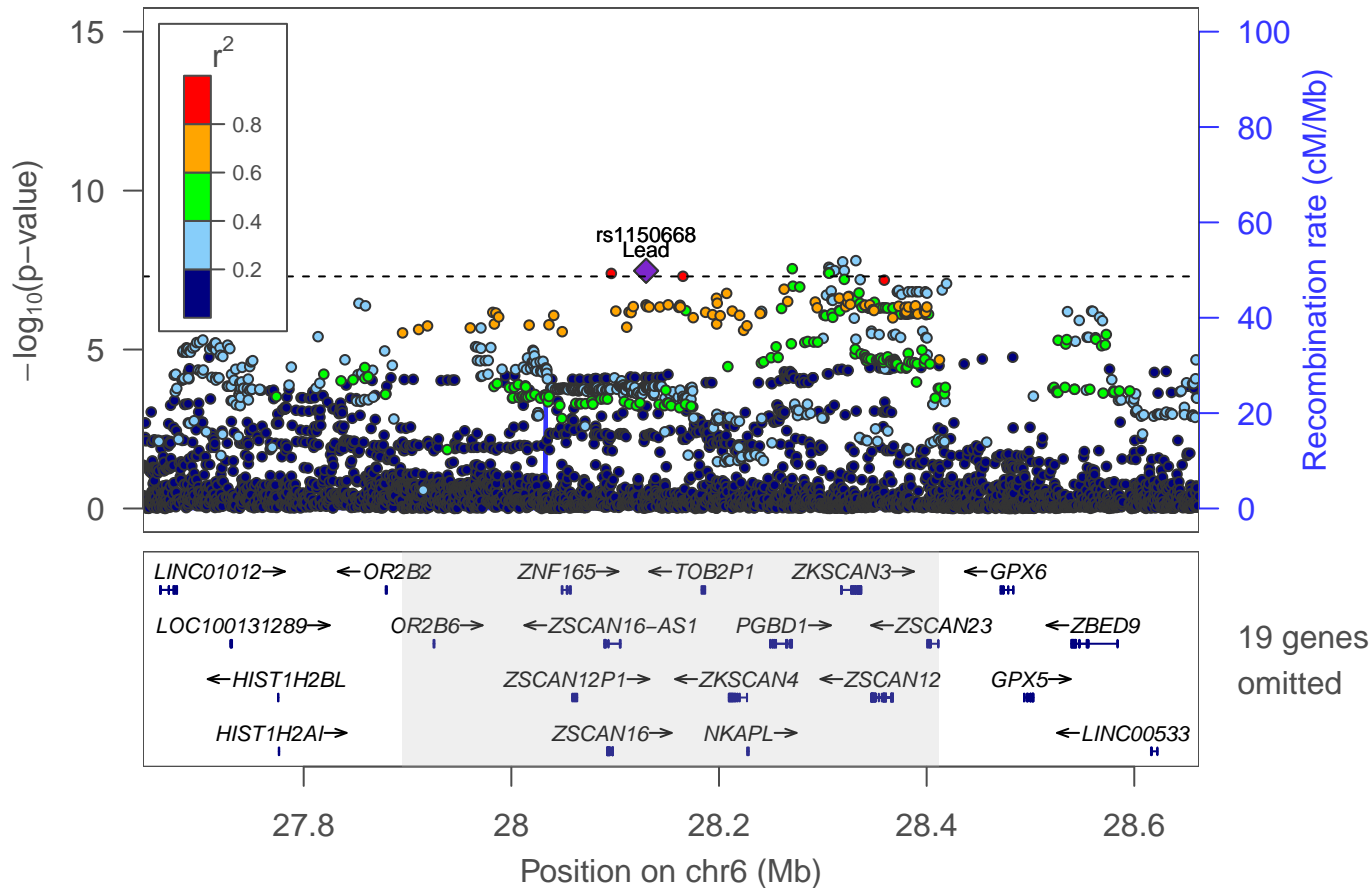

# Ever smoker: locus 75 [chr 6:29.785–30.065Mb]

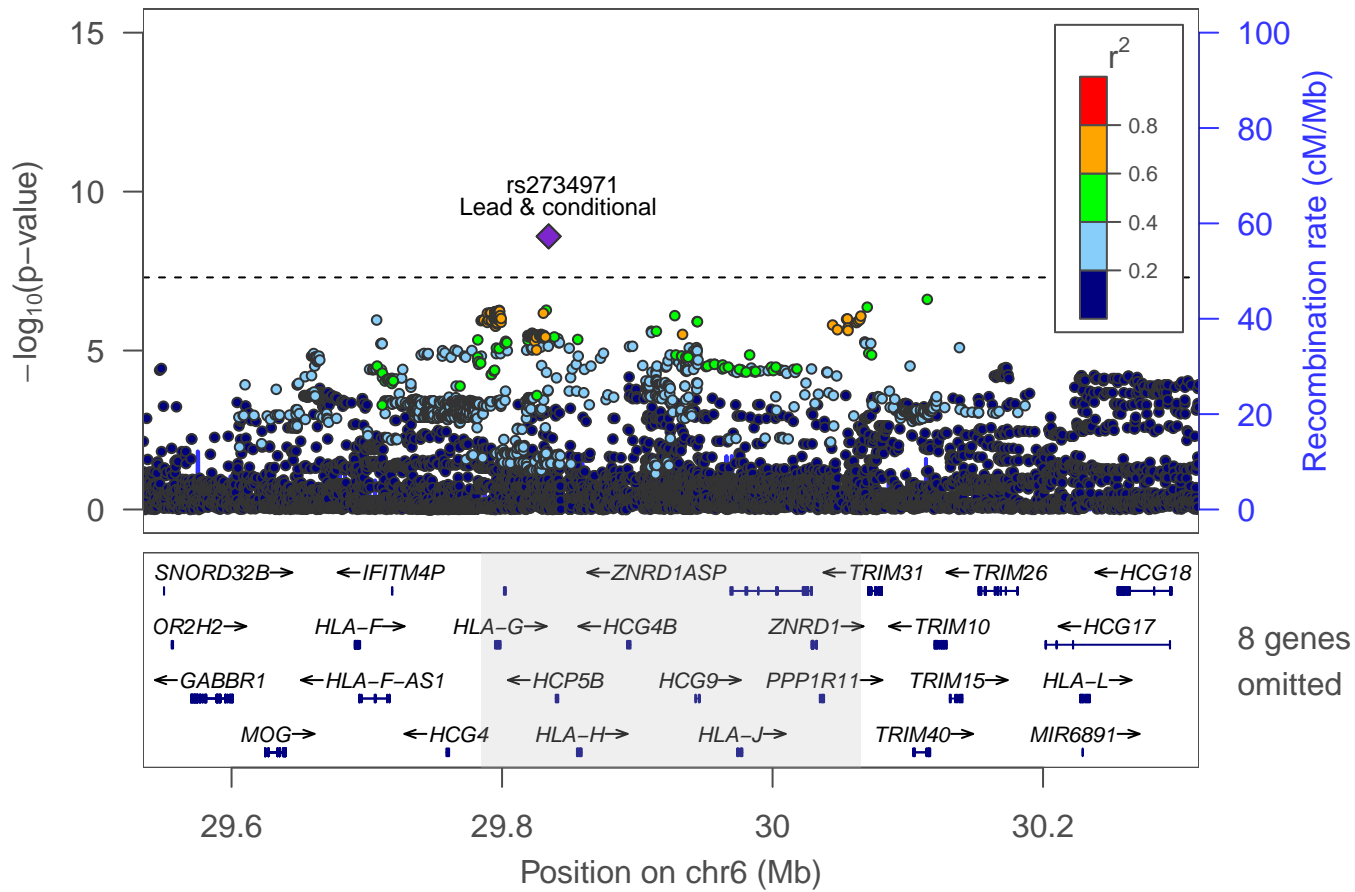



# Ever smoker: locus 76 [chr 6:31.605–31.610Mb]

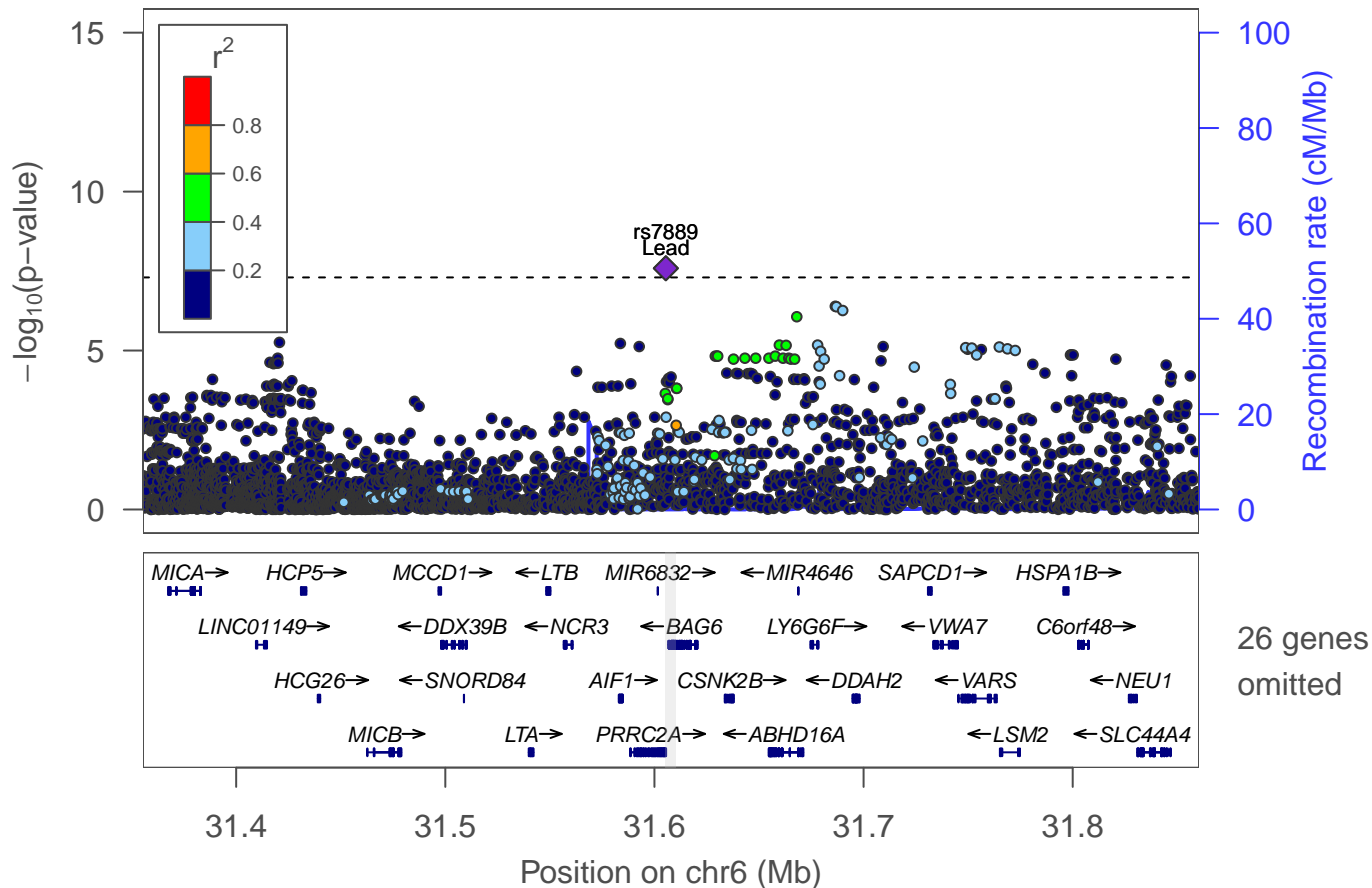

# Ever smoker: locus 77 [chr 6:37.370–37.488Mb]

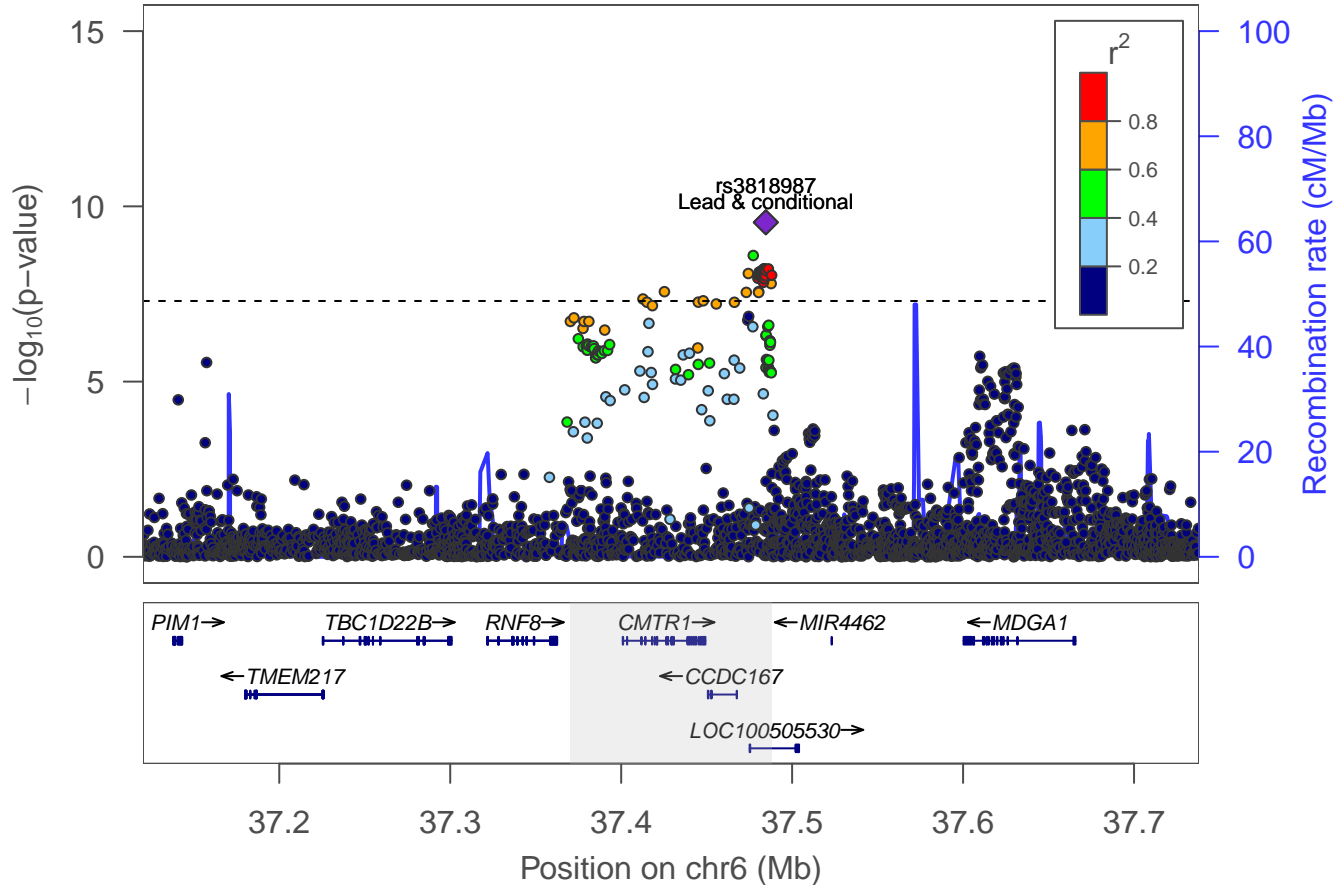

# Ever smoker: locus 78 [chr 6:50.597–50.934Mb]

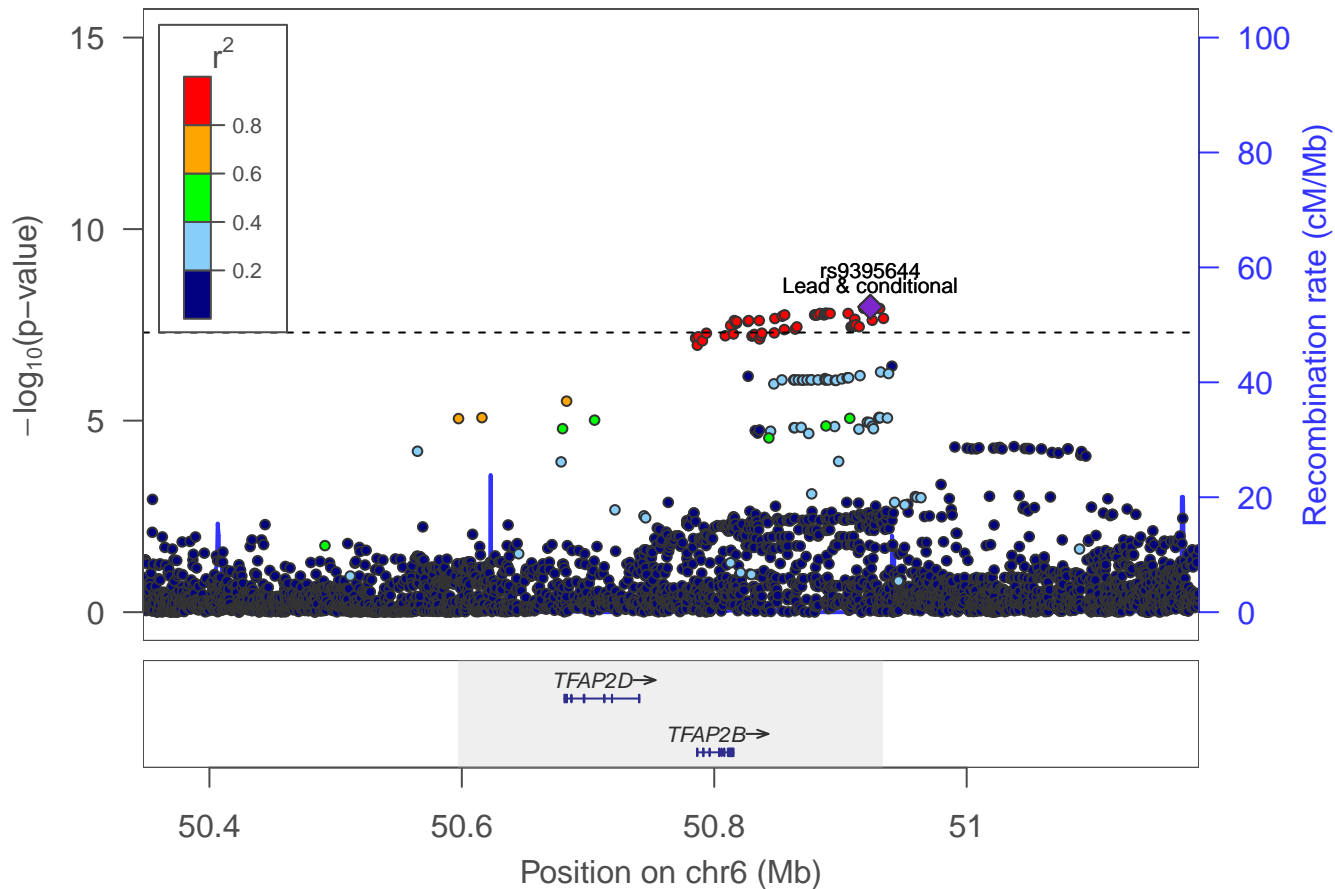

# Ever smoker: locus 79 [chr 6:67.488–67.556Mb]

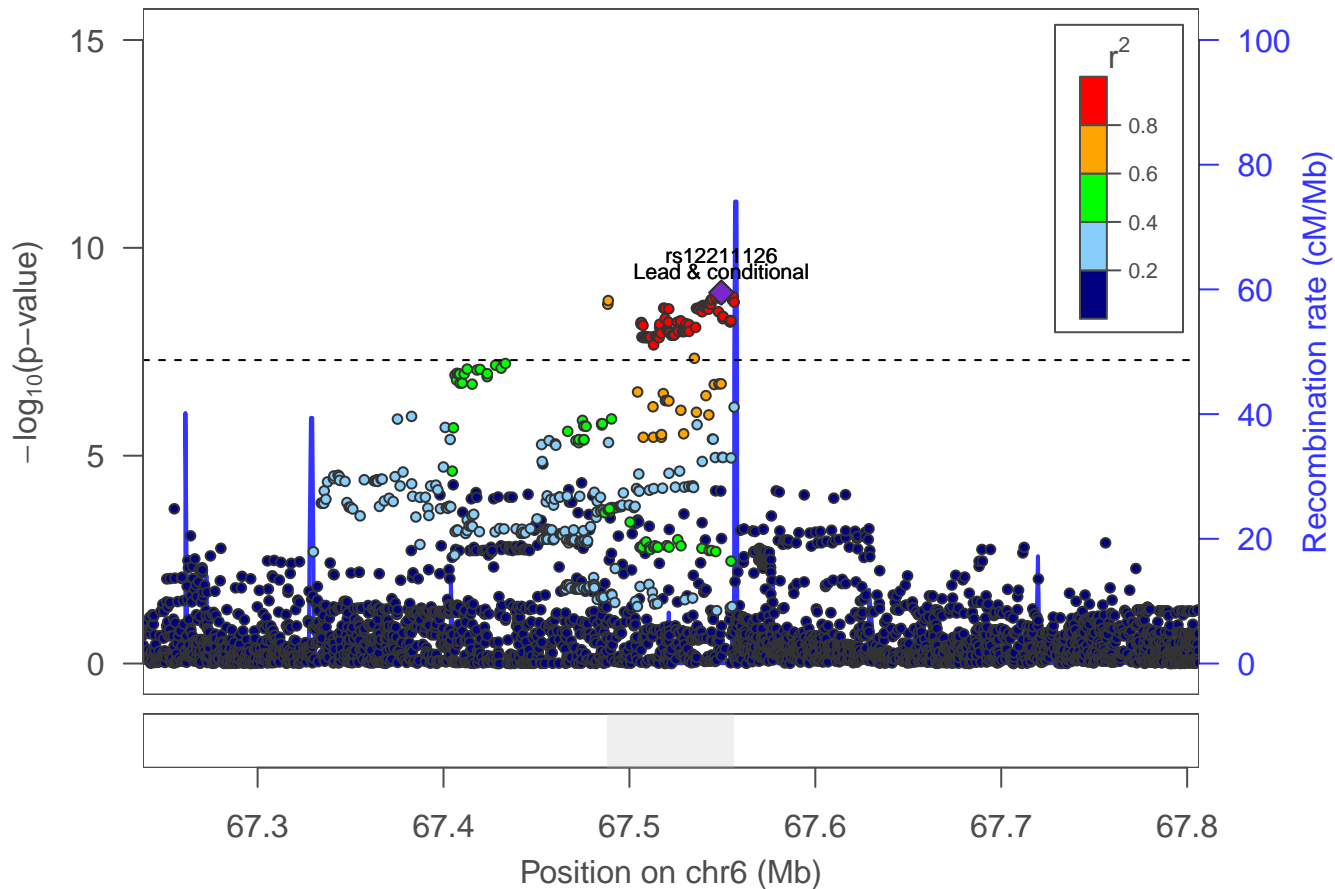

# Ever smoker: locus 80 [chr 6:93.833–93.849Mb]

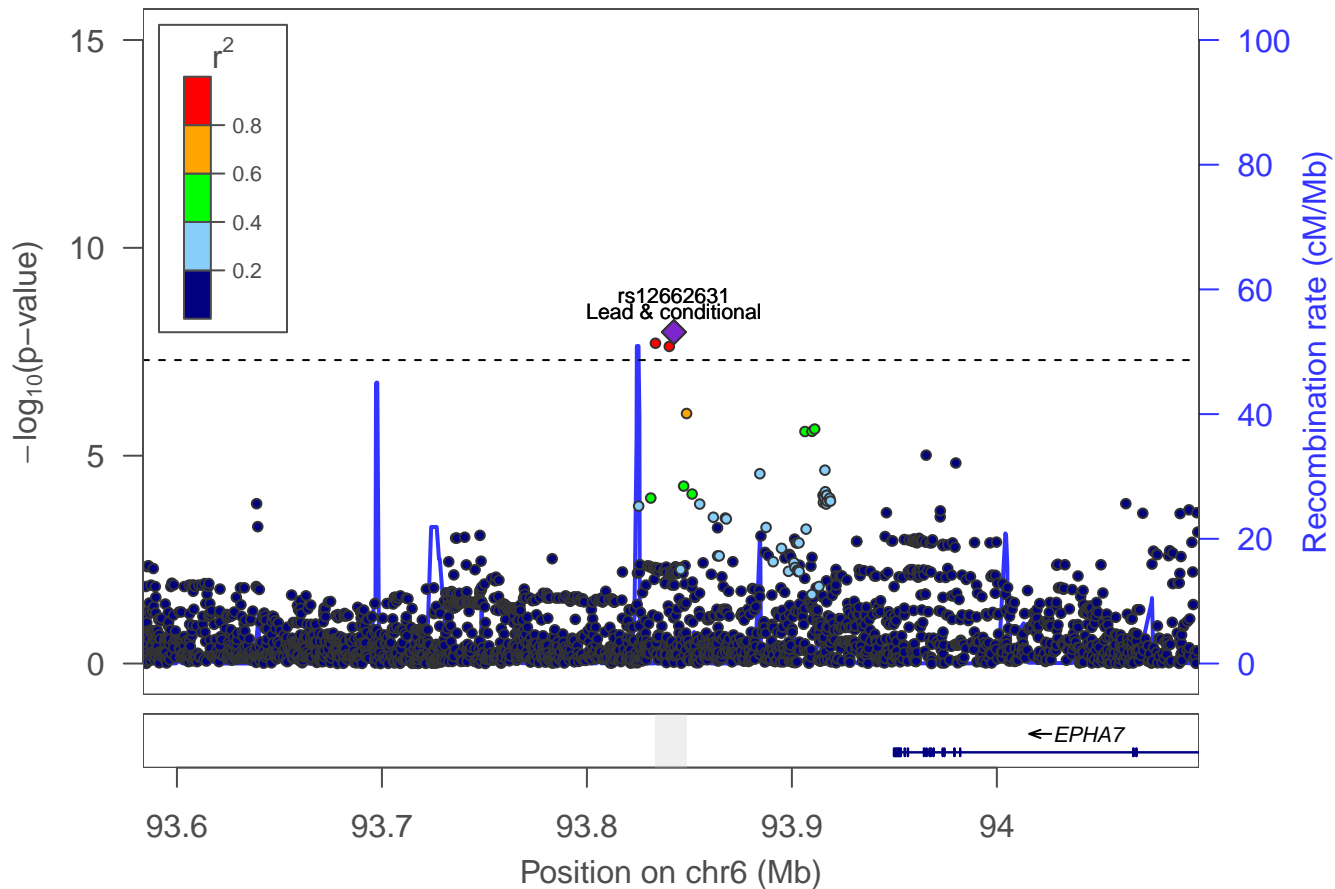

# Ever smoker: locus 81 [chr 6:98.595–98.752Mb]

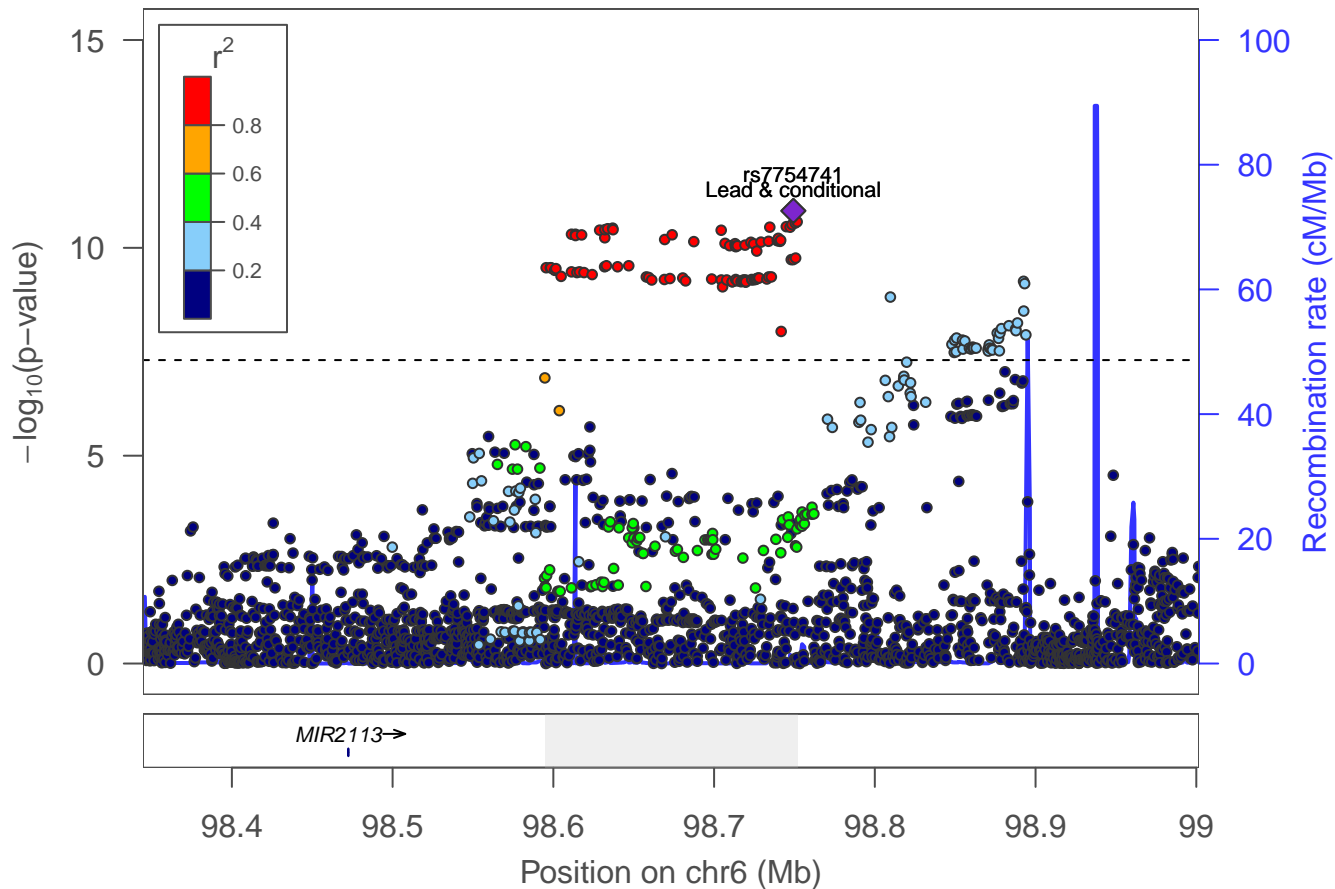

# Ever smoker: locus 82 [chr 6:100.909–101.339Mb]

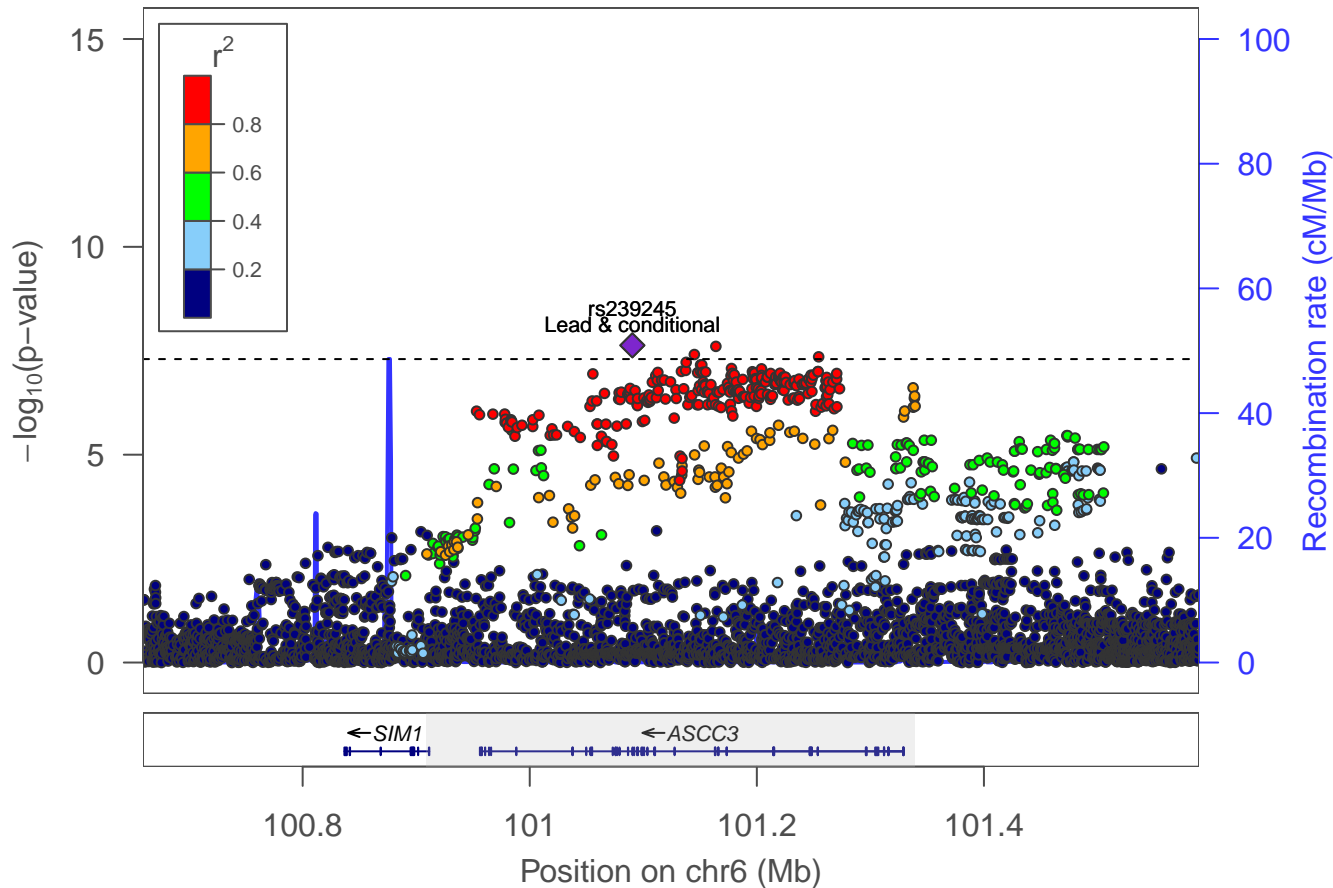

# Ever smoker: locus 83 [chr 6:108.886–109.020Mb]

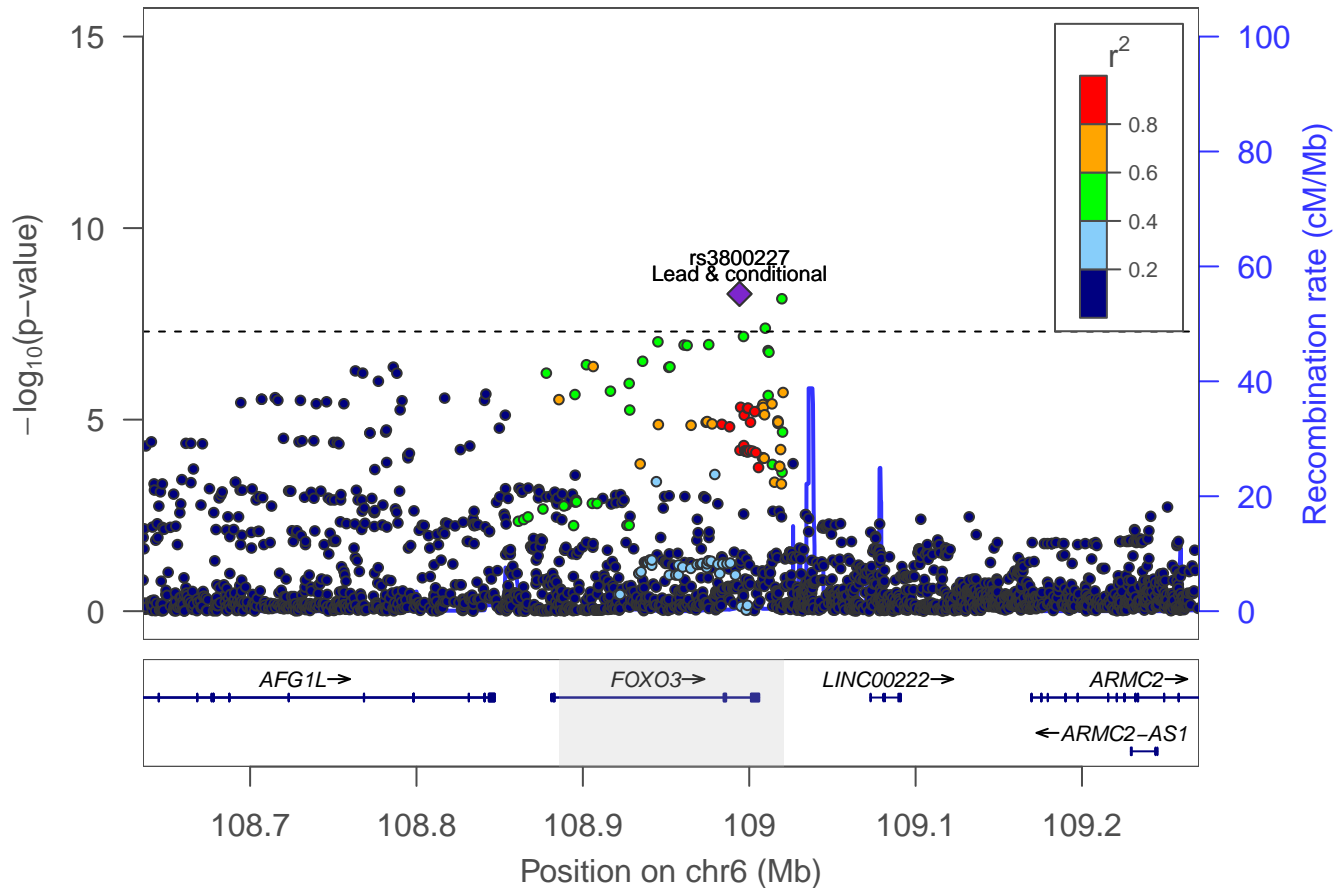



# Ever smoker: Locus 84 [chr 6: 111.578–111.872Mb]

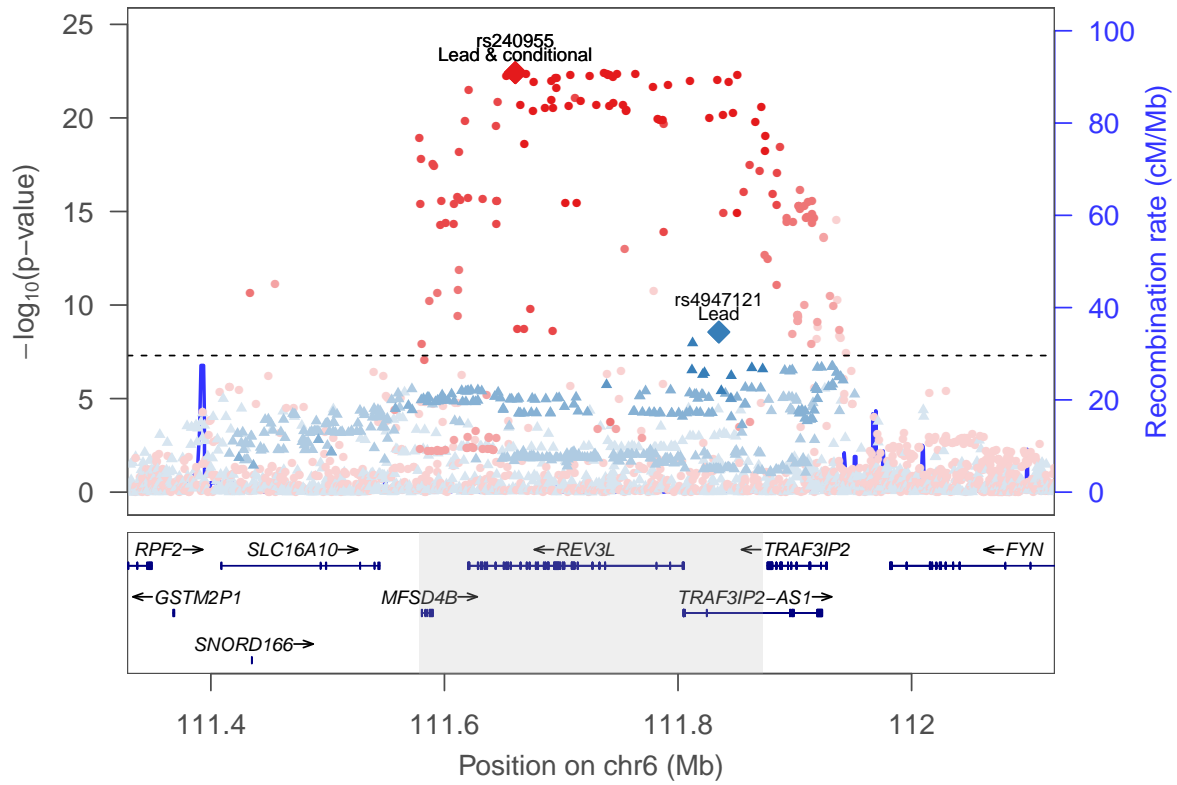

rs4947121 ▲  
rs240955 ●

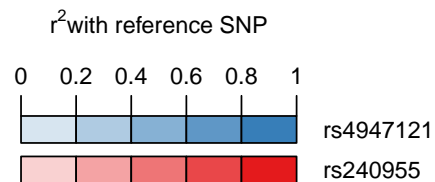

# Ever smoker: locus 85 [chr 6:129.413–129.517Mb]

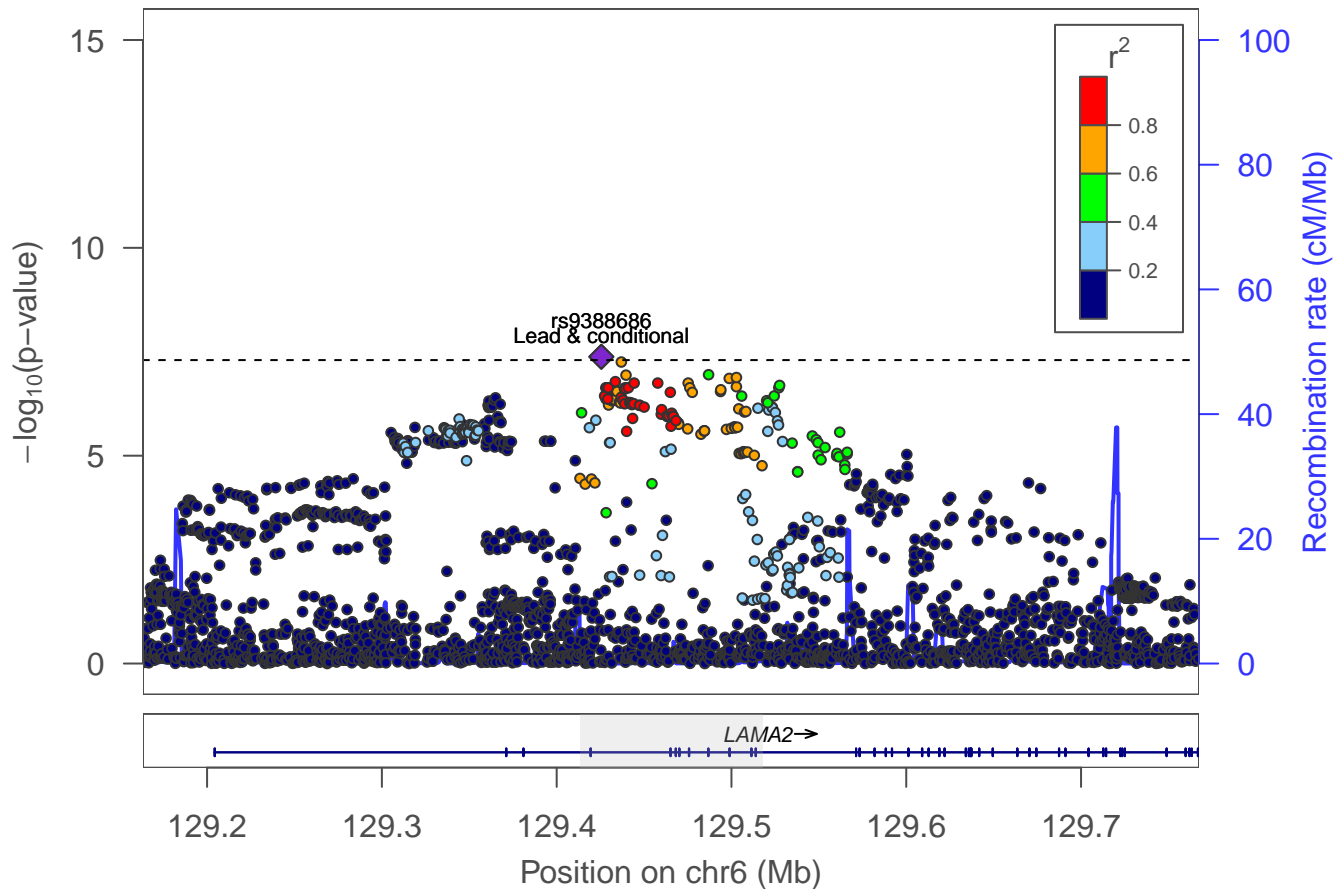

# Ever smoker: Locus 86 [chr 7: 1.657–1.969Mb]

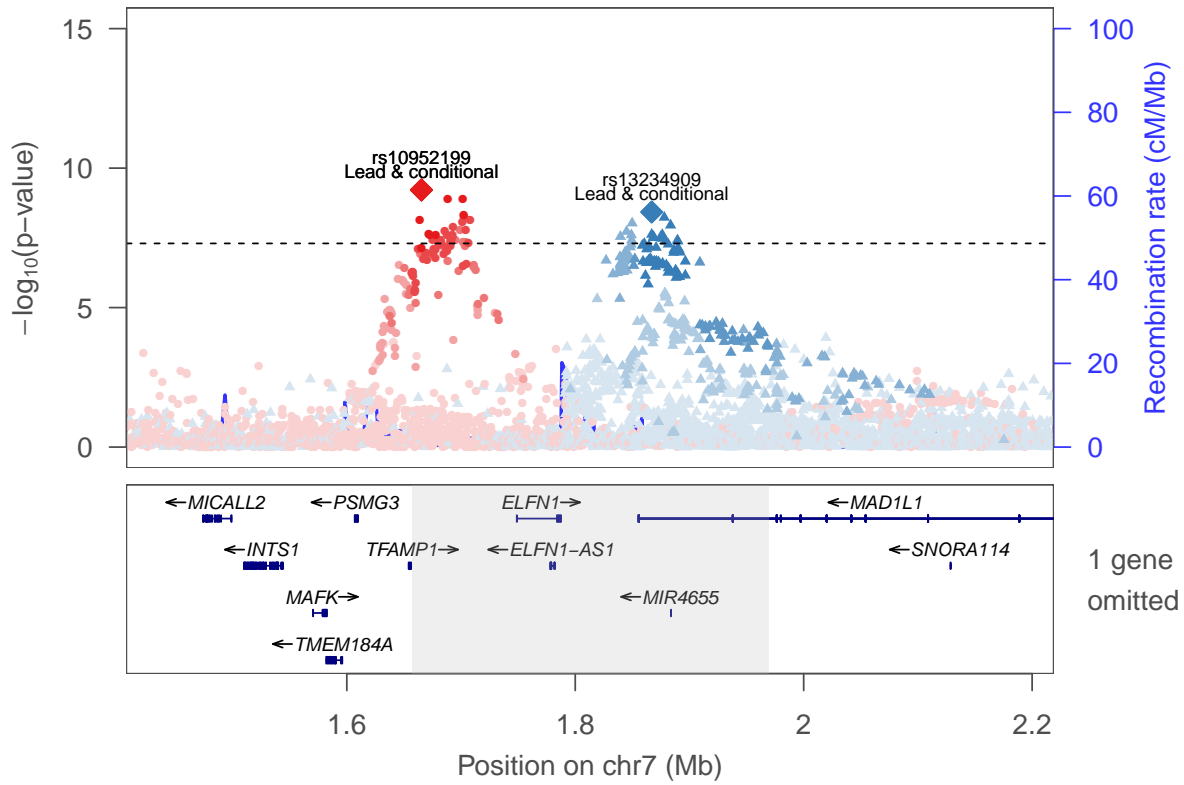

rs13234909 ▲  
 rs10952199 ●

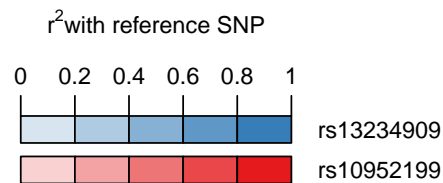

# Ever smoker: Locus 87 [chr 7: 3.340–3.589Mb]

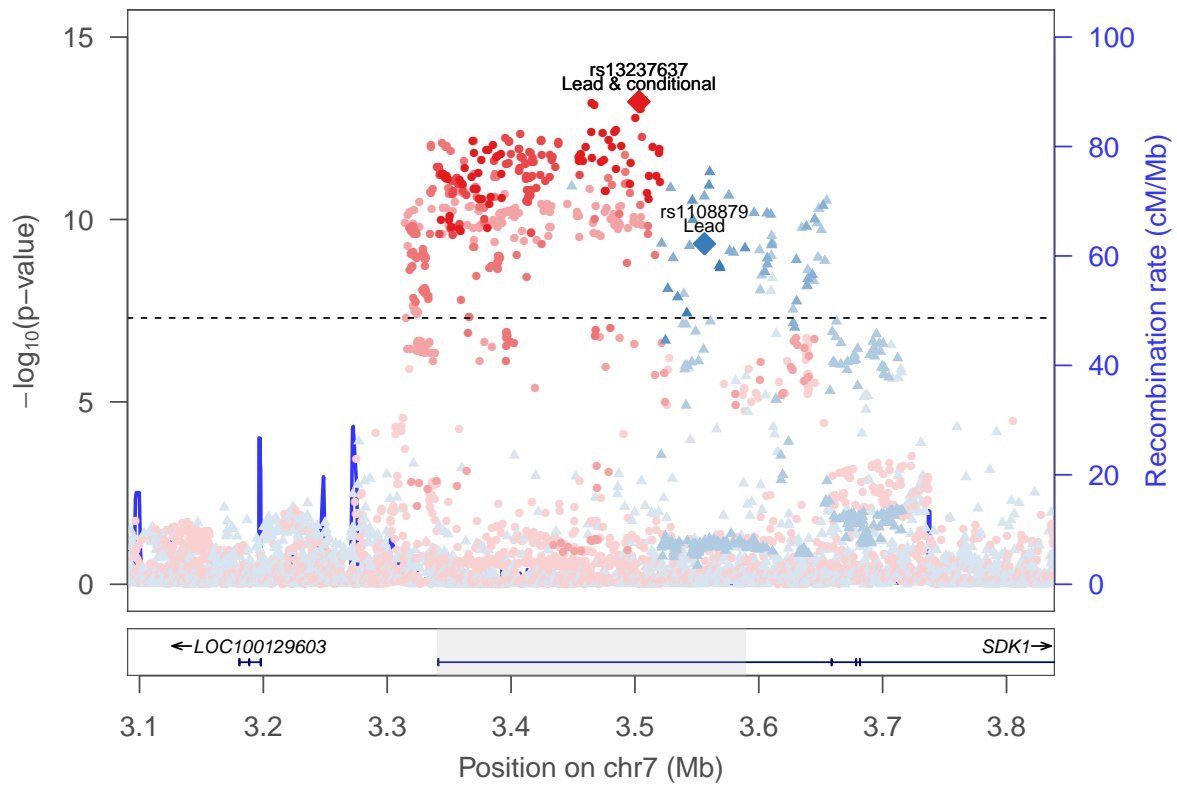

rs1108879 ▲  
rs13237637 ●

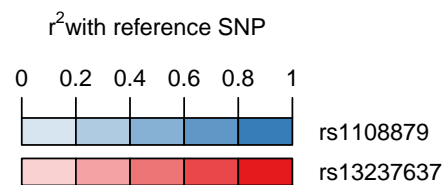

# Ever smoker: locus 88 [chr 7:39.430–39.433Mb]

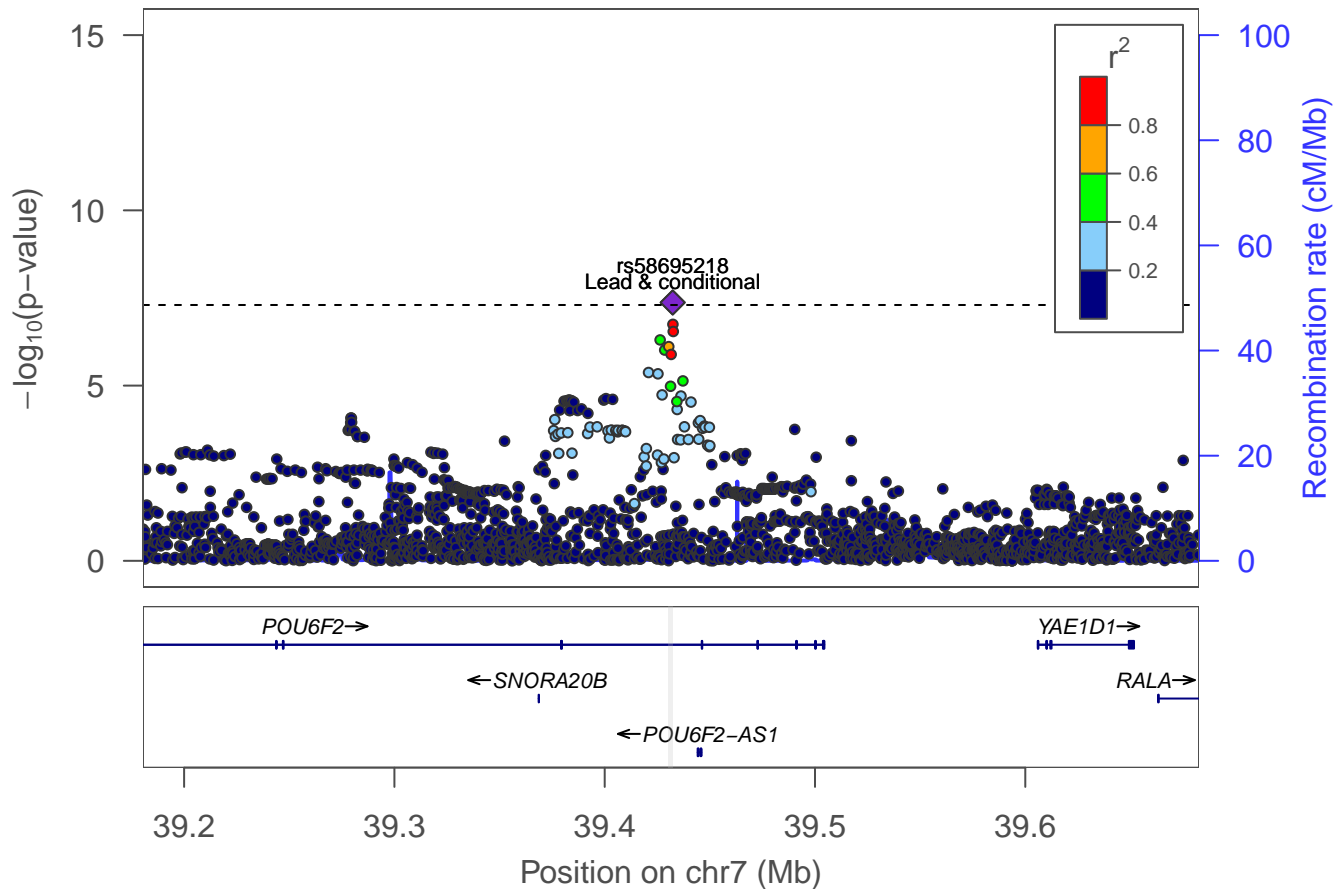

# Ever smoker: locus 89 [chr 7:53.122–53.168Mb]

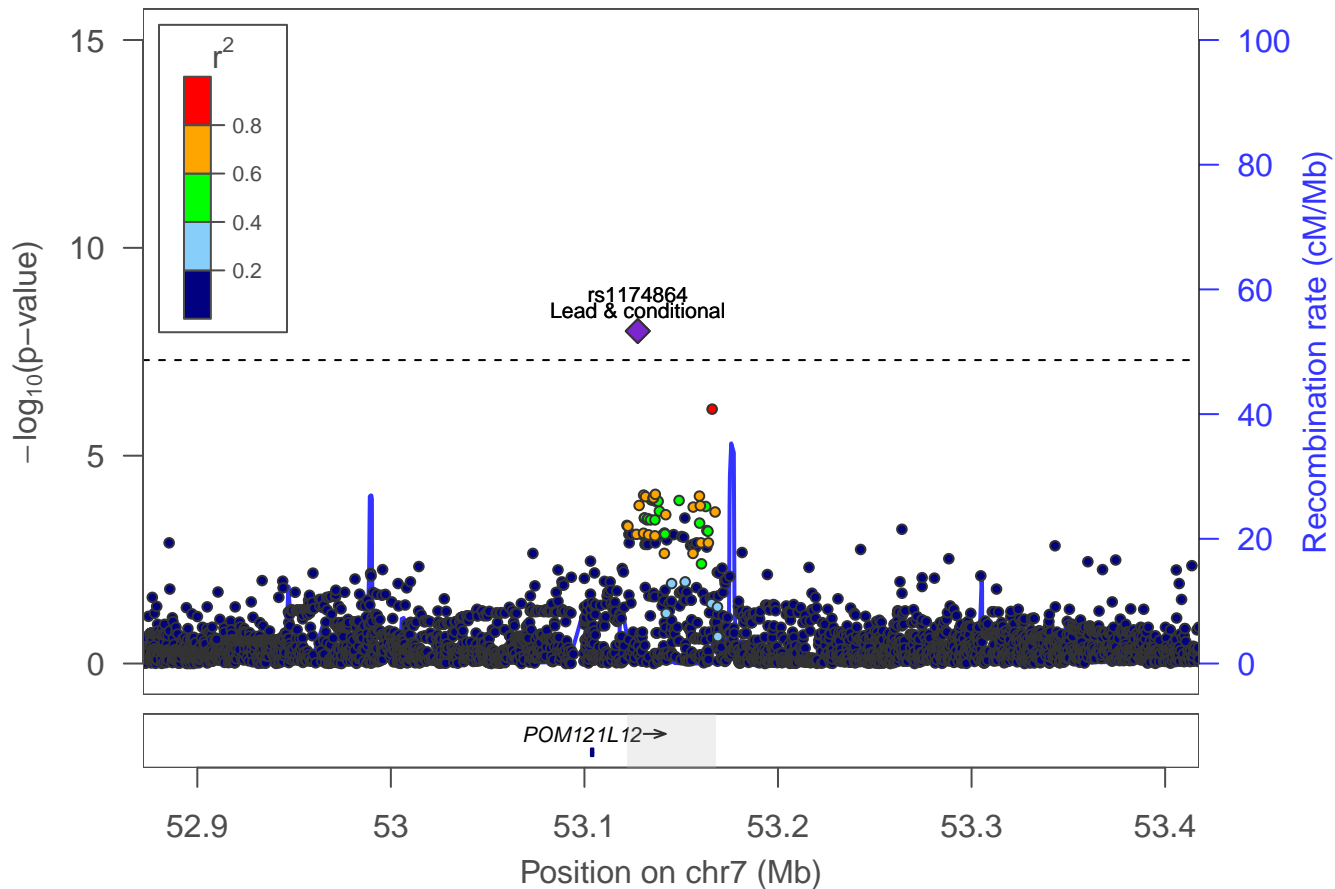

# Ever smoker: locus 90 [chr 7:70.522–70.607Mb]

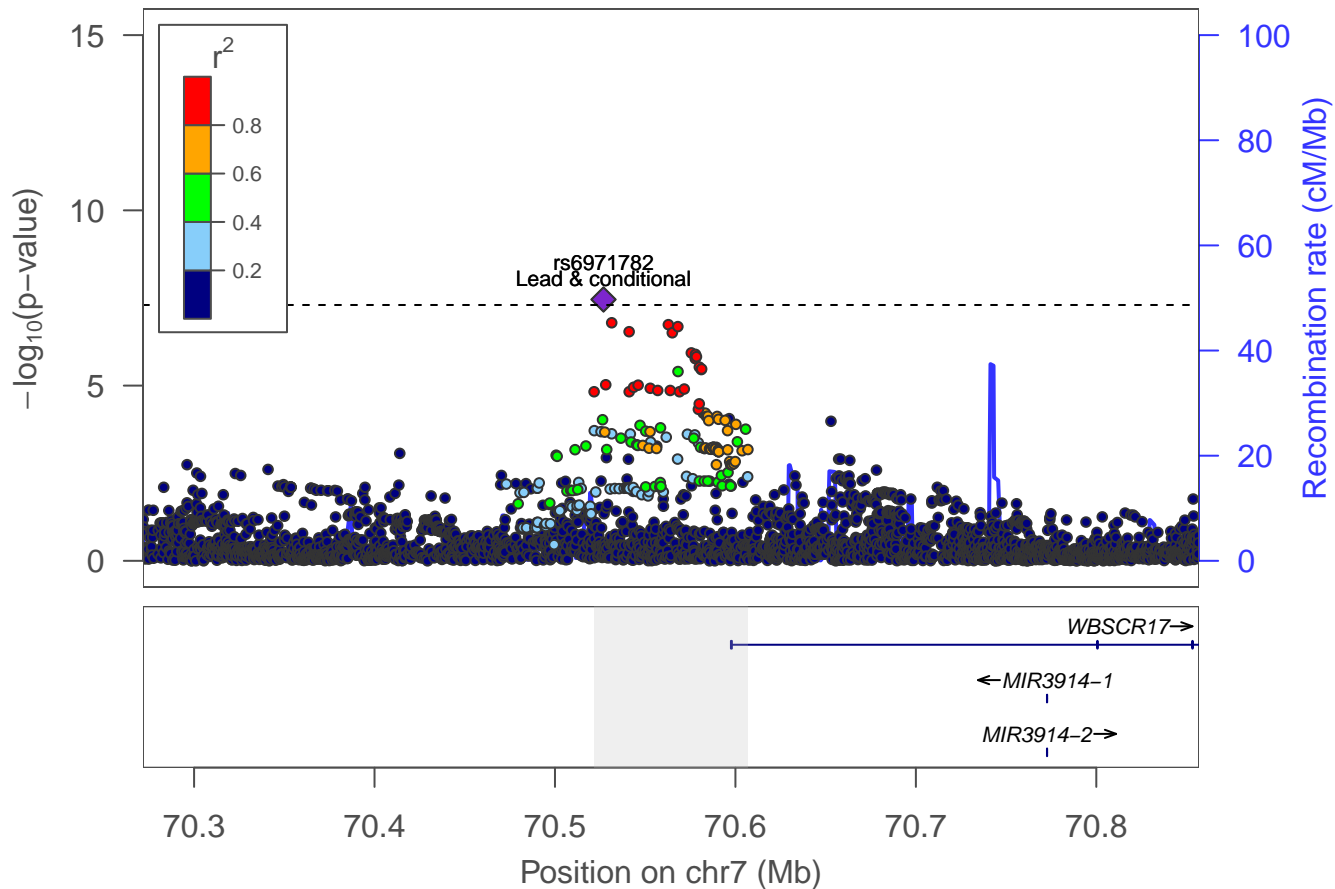

# Ever smoker: Locus 91 [chr 7: 96.624–96.626Mb]

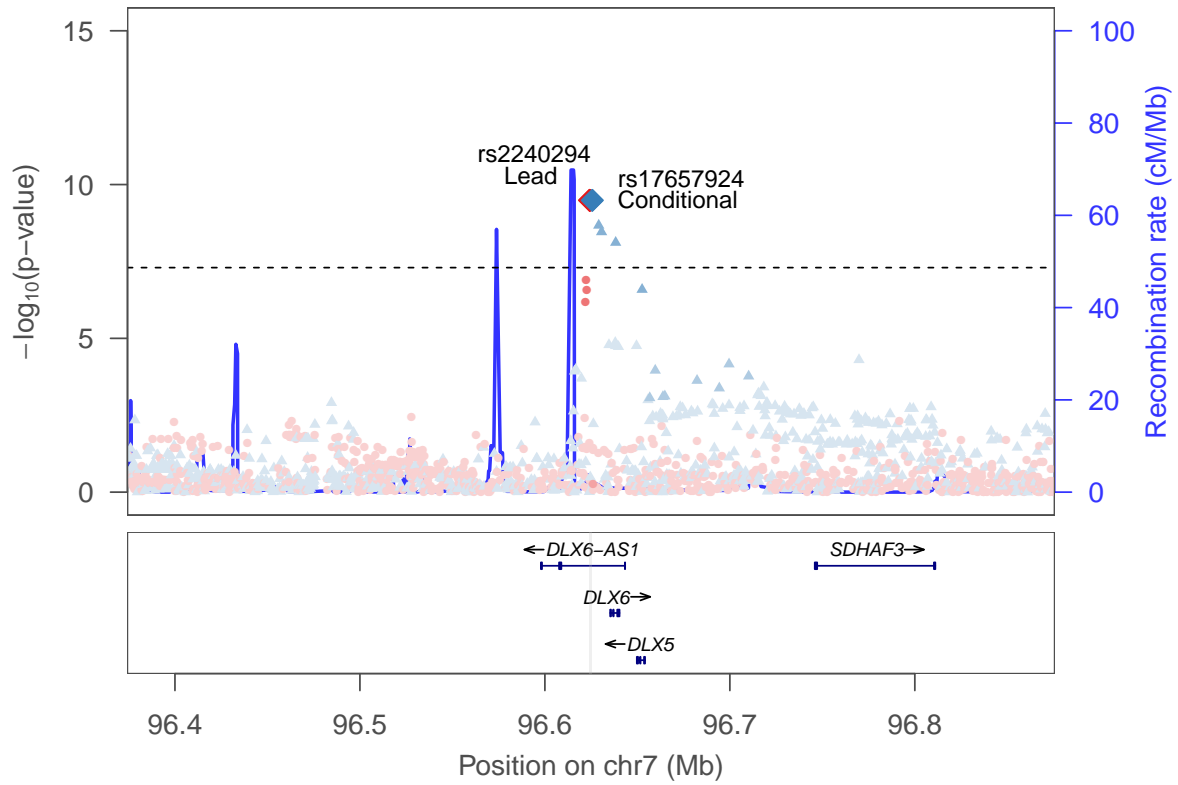

rs17657924 ▲  
rs2240294 ●

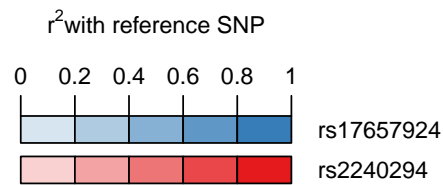



# Ever smoker: locus 92 [chr 7:98.899–99.266Mb]

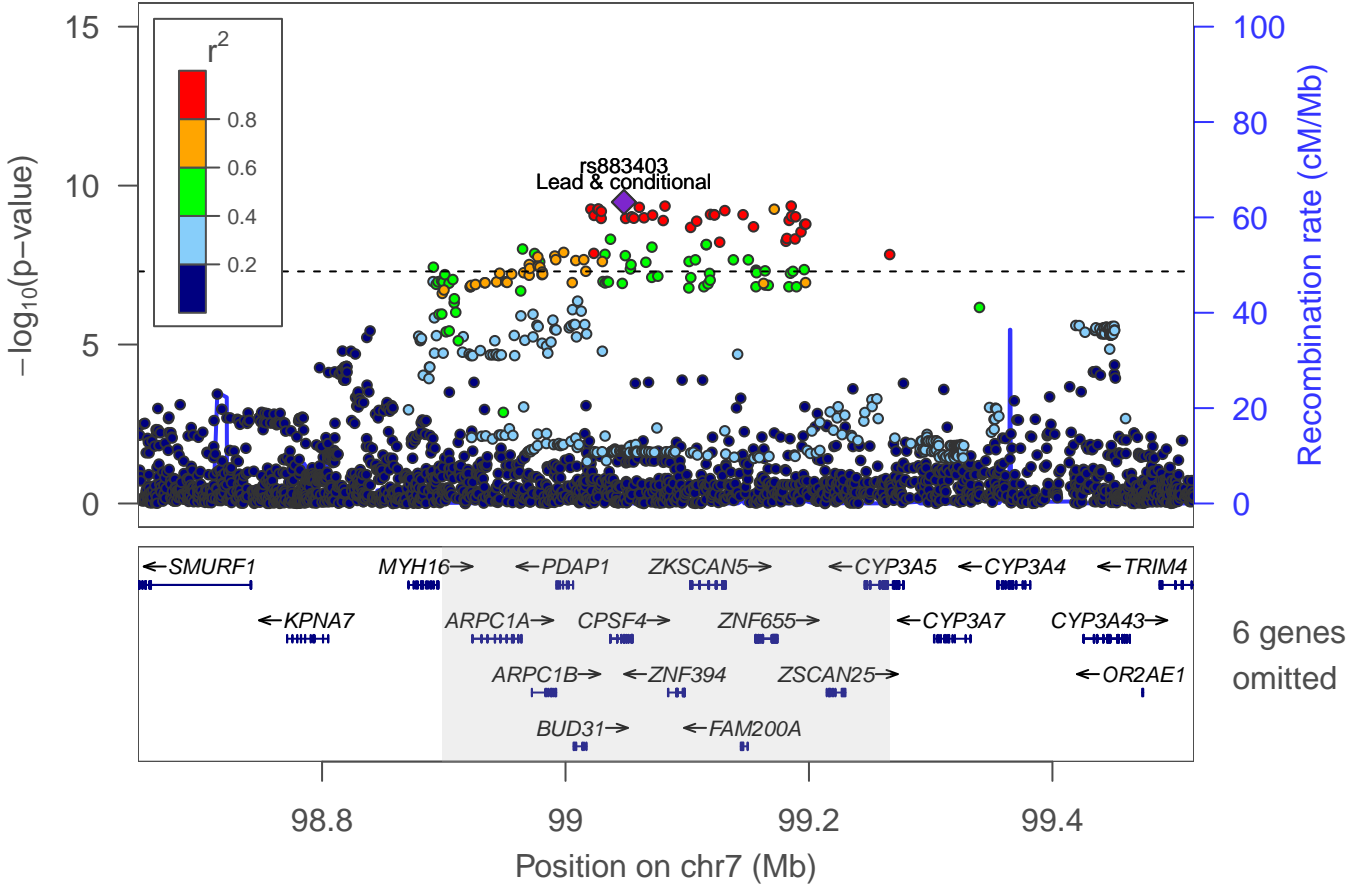

# Ever smoker: locus 93 [chr 7:114.940–115.117Mb]

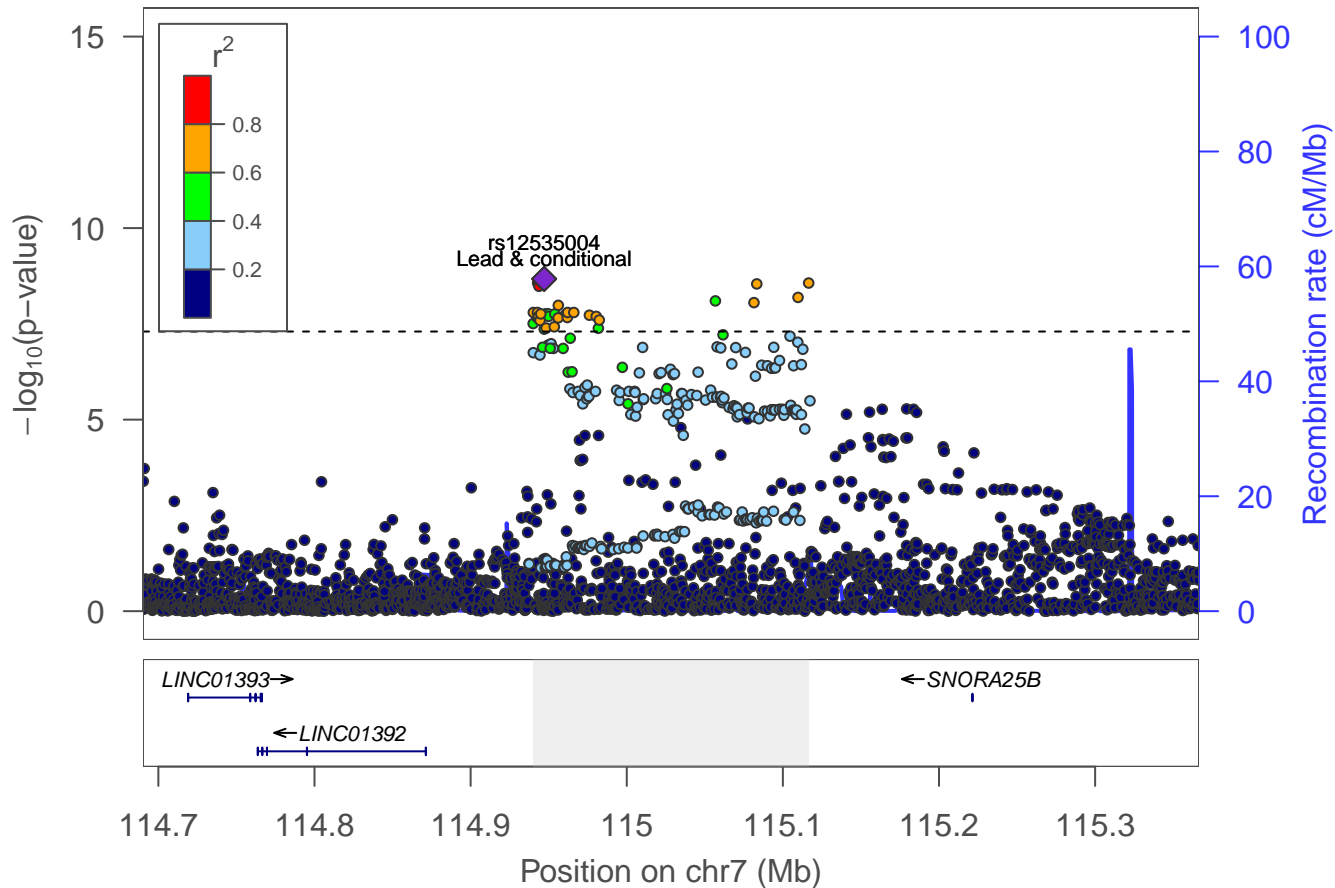

# Ever smoker: locus 94 [chr 7:117.498–117.593Mb]

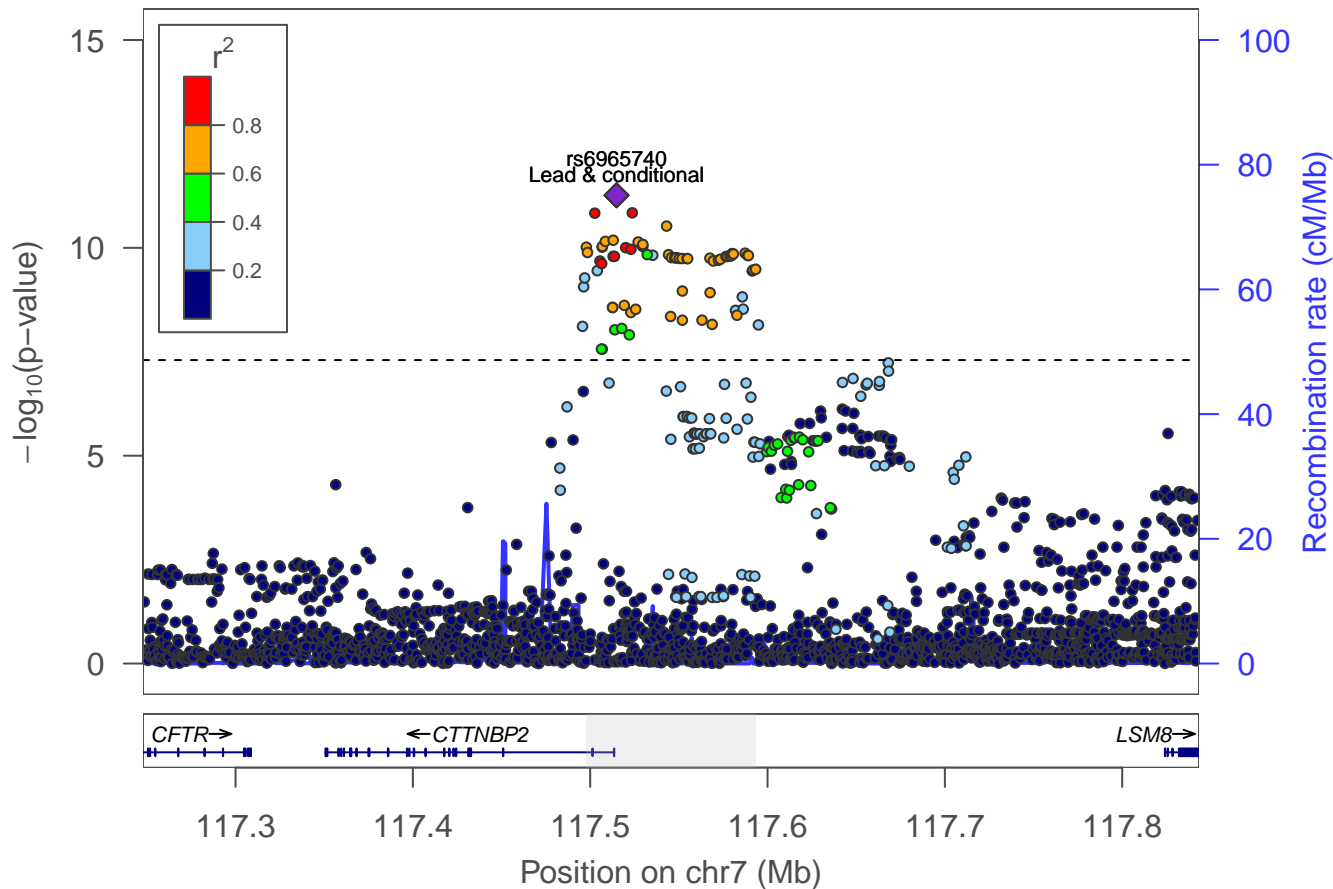

# Ever smoker: locus 95 [chr 7:121.955–121.967Mb]

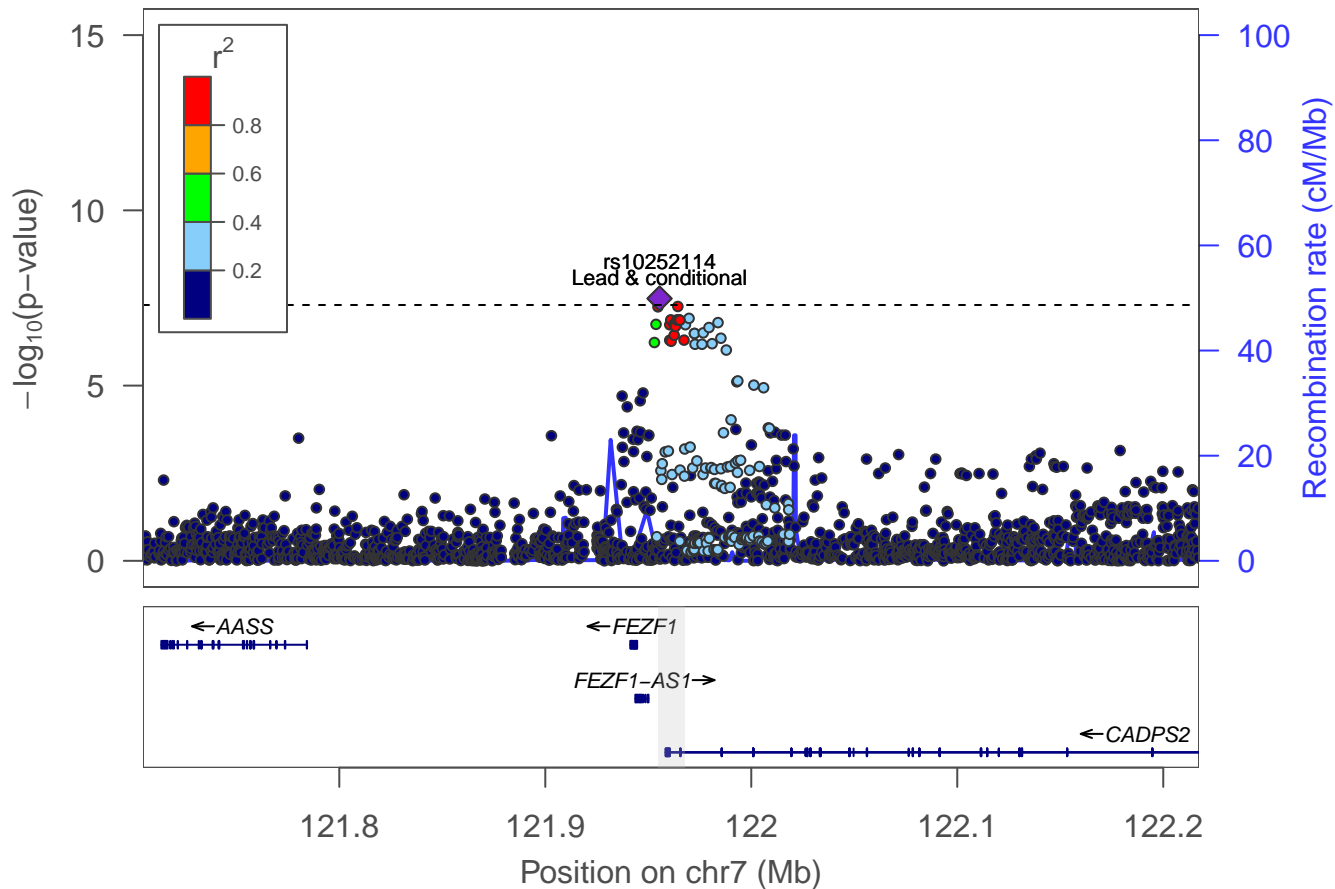

# Ever smoker: locus 96 [chr 7:132.277–132.363Mb]

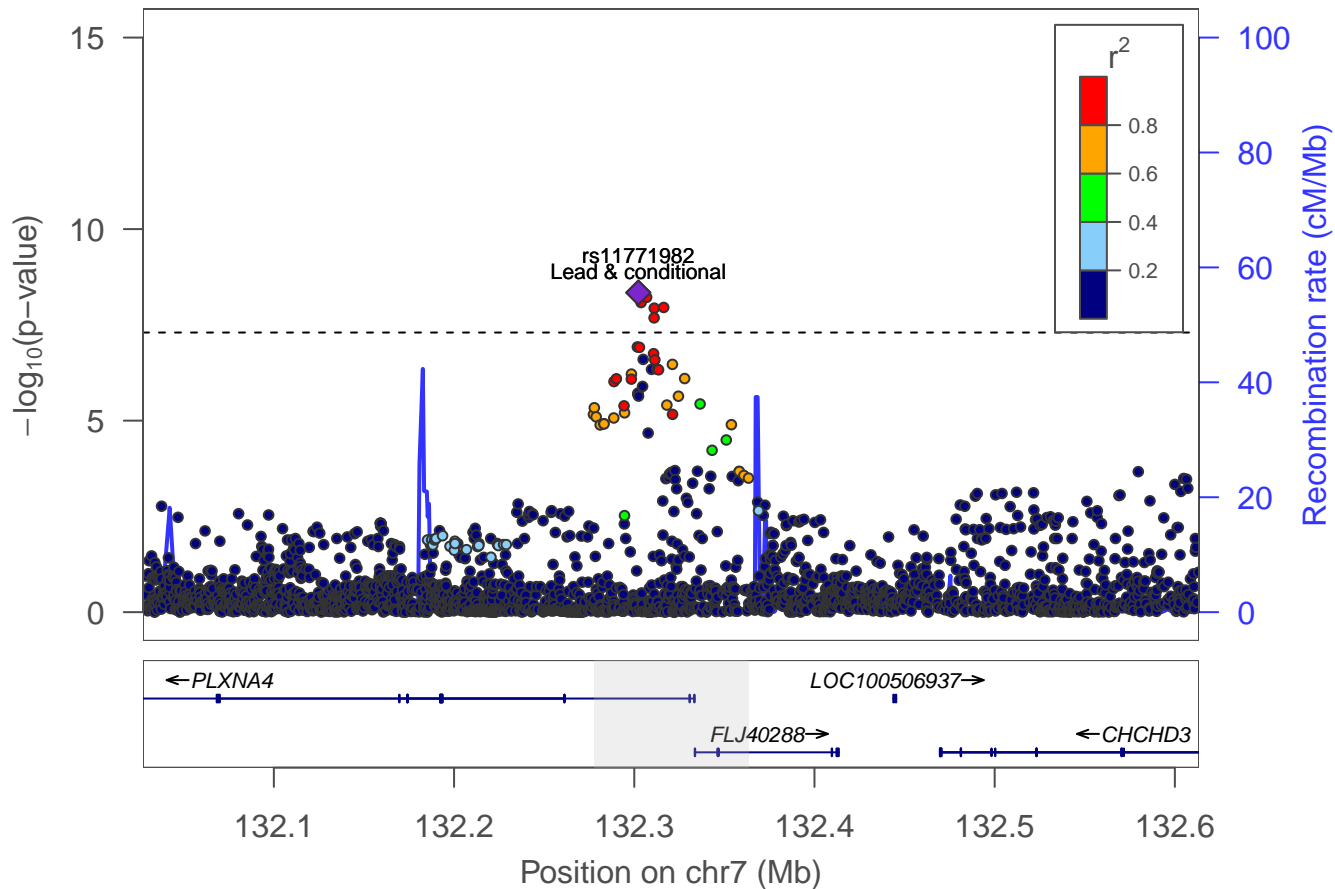

# Ever smoker: locus 97 [chr 7:133.473–133.619Mb]

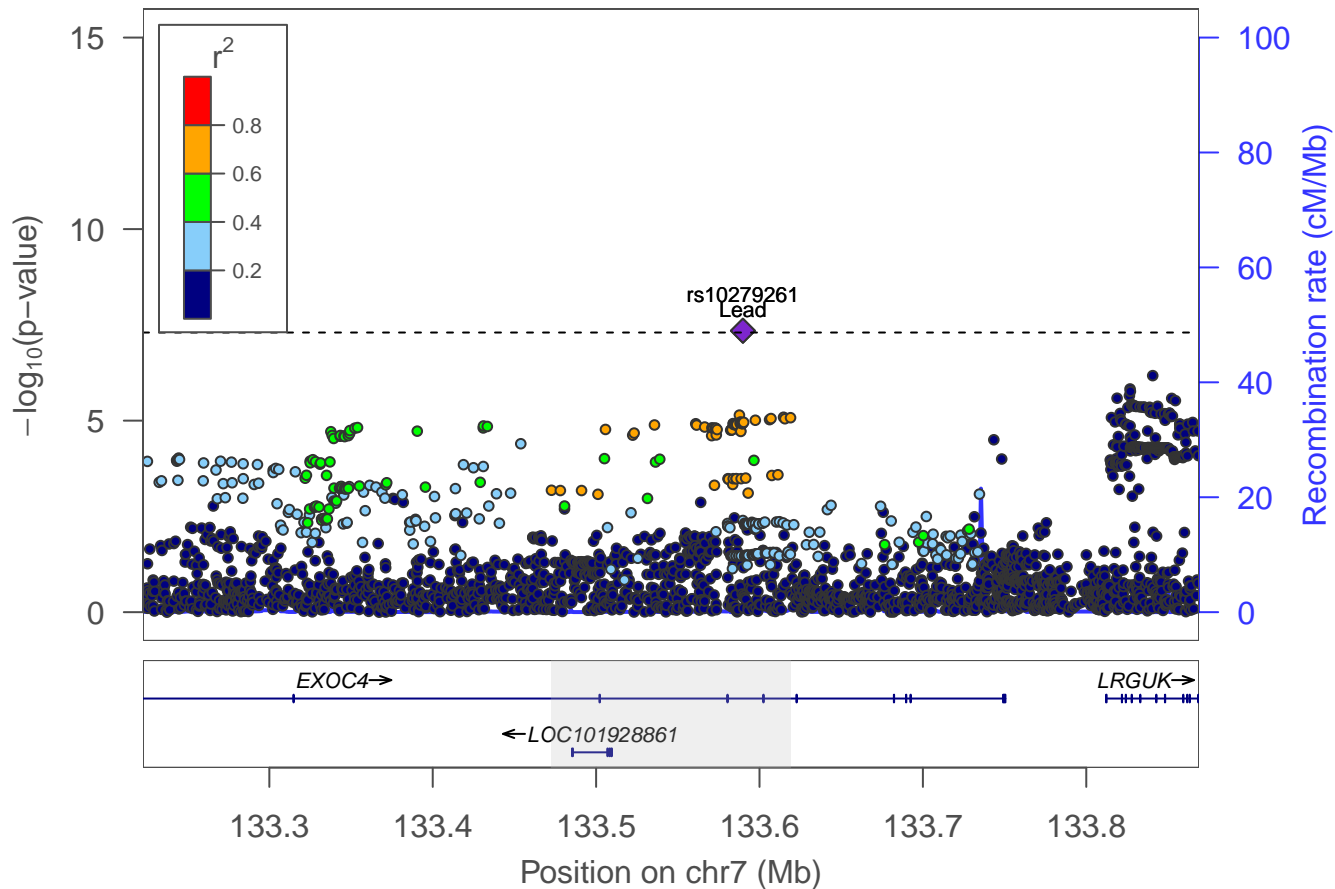

# Ever smoker: locus 98 [chr 8:10.126–10.180Mb]

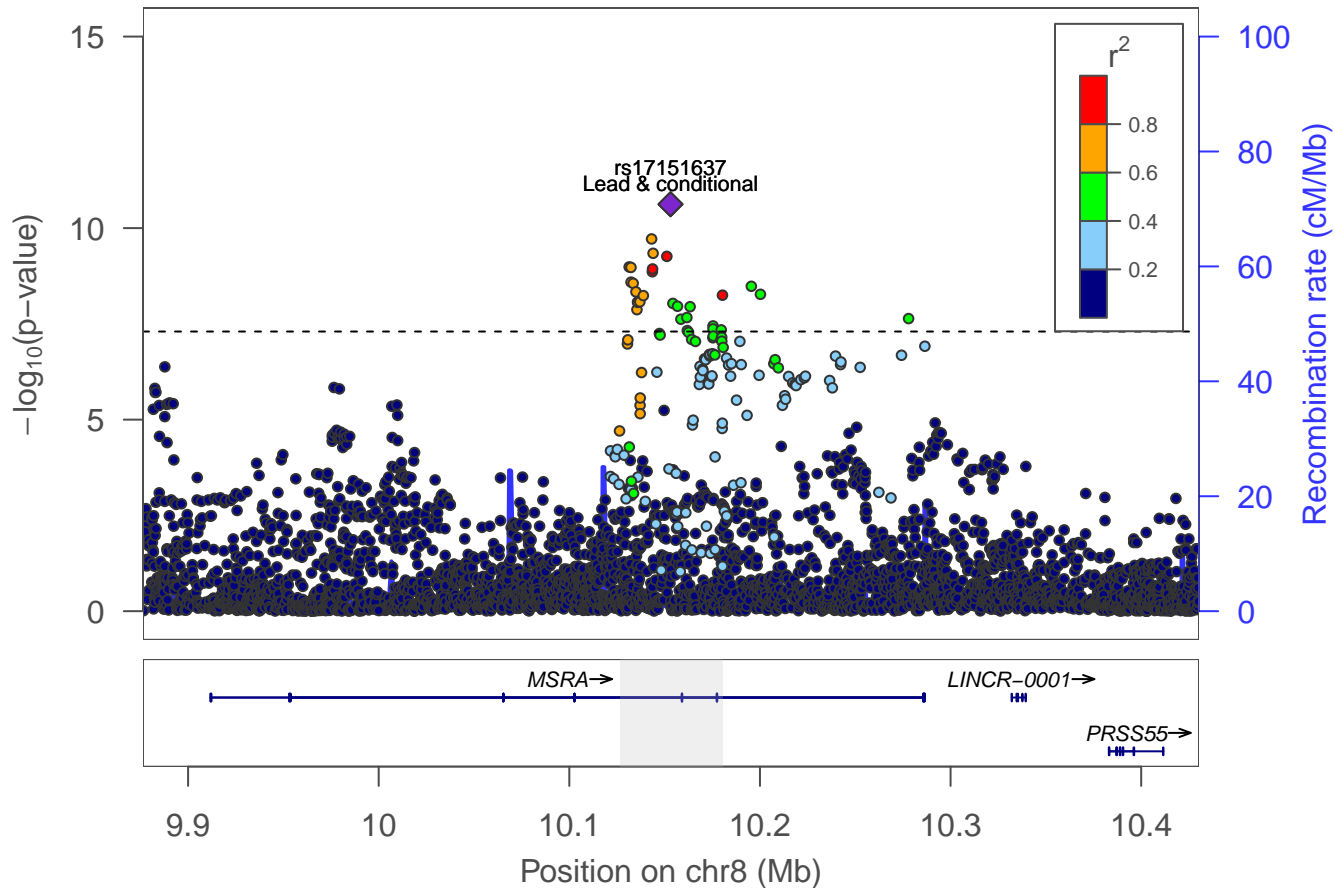

# Ever smoker: locus 99 [chr 8:10.836–10.858Mb]

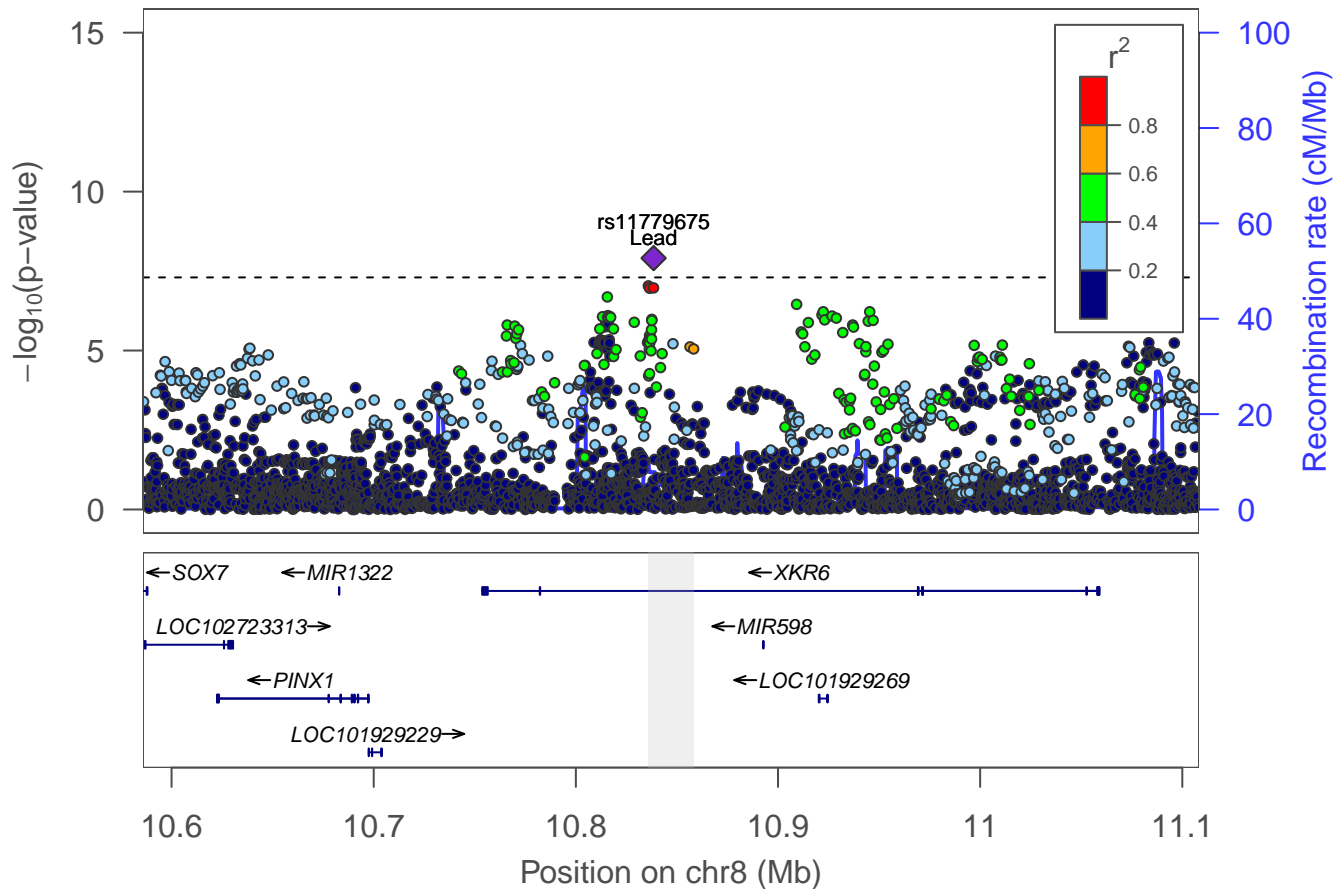



# Ever smoker: locus 100 [chr 8:27.406–27.455Mb]

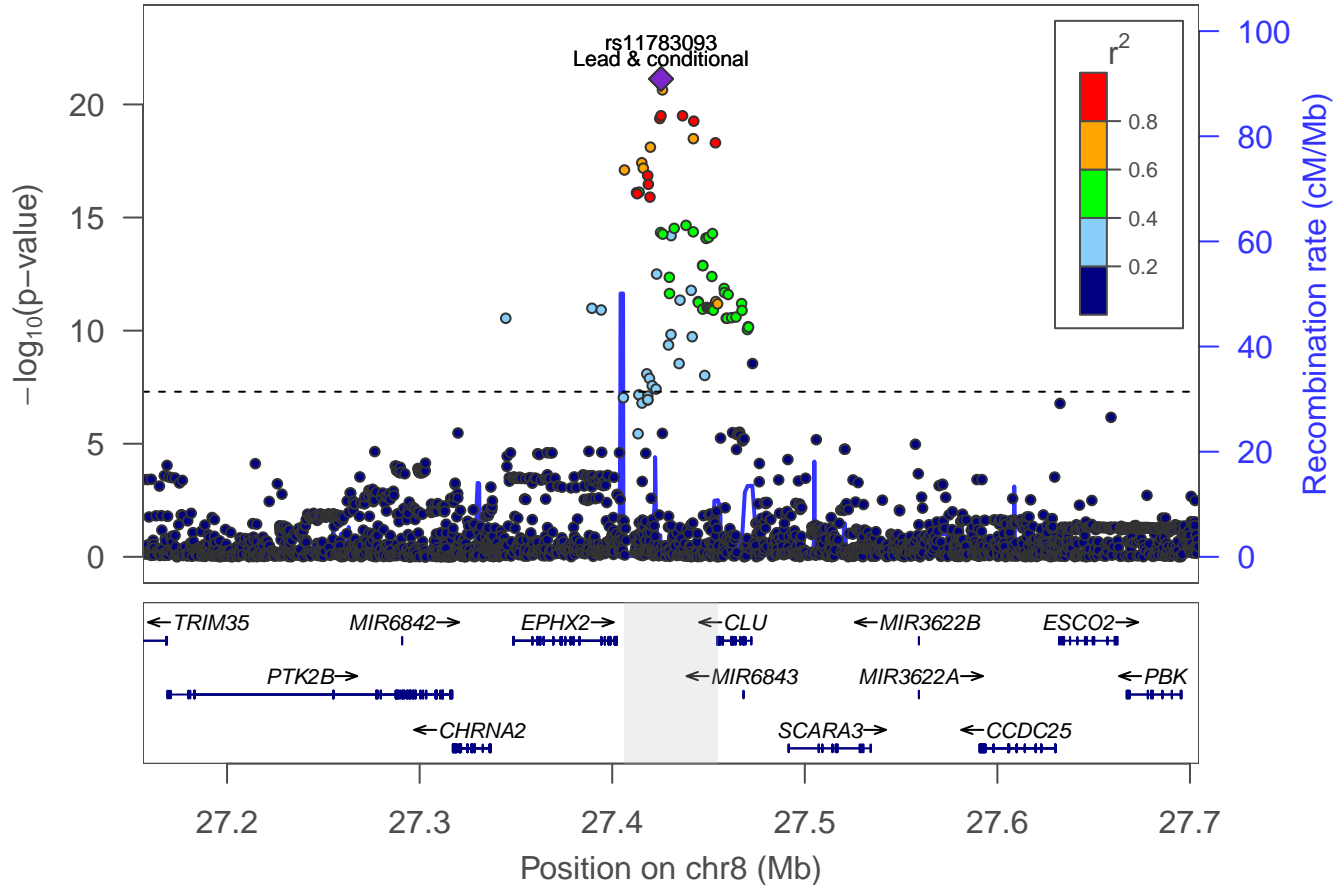

# Ever smoker: locus 101 [chr 8:59.799–59.817Mb]

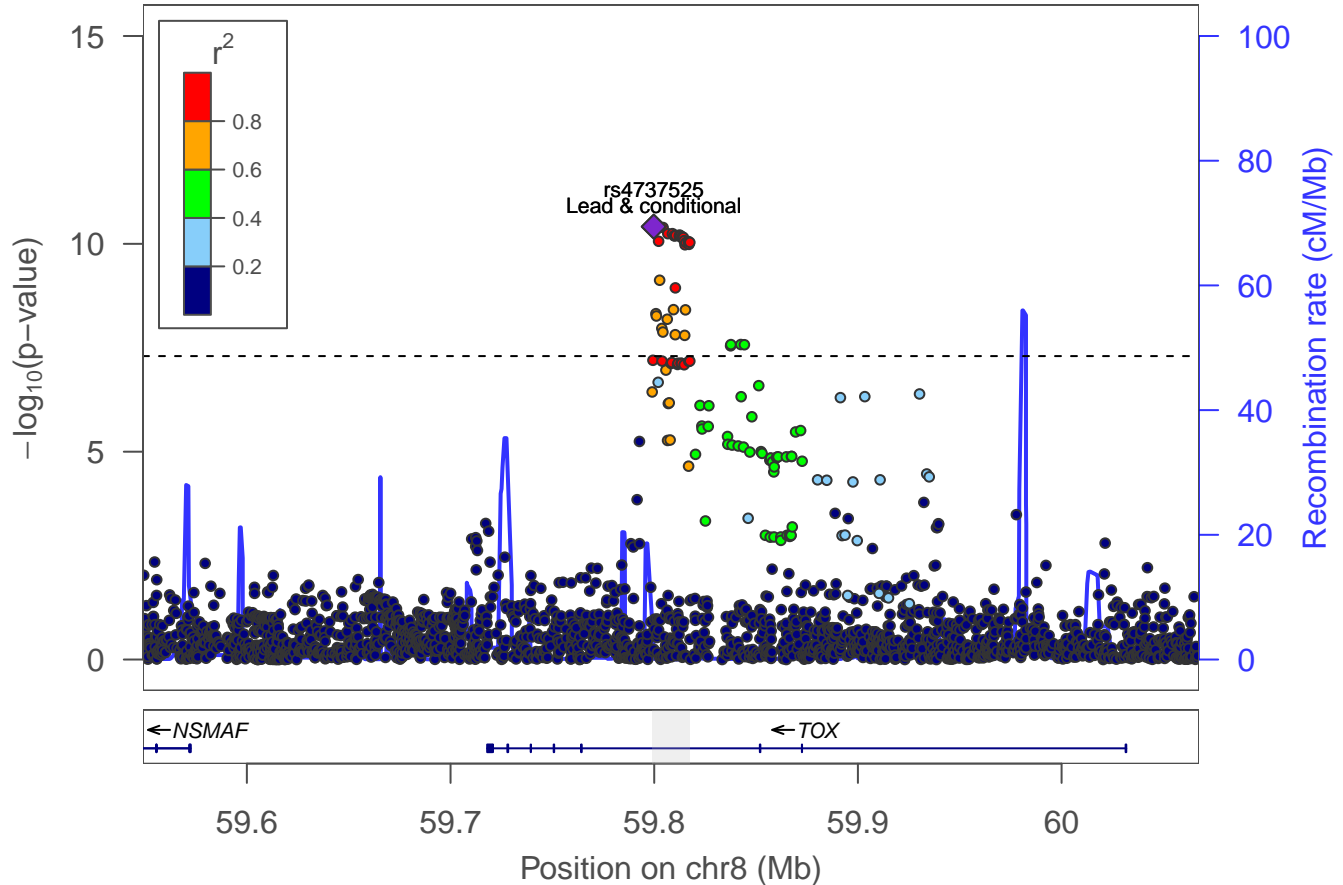

# Ever smoker: locus 102 [chr 8:92.749–92.815Mb]

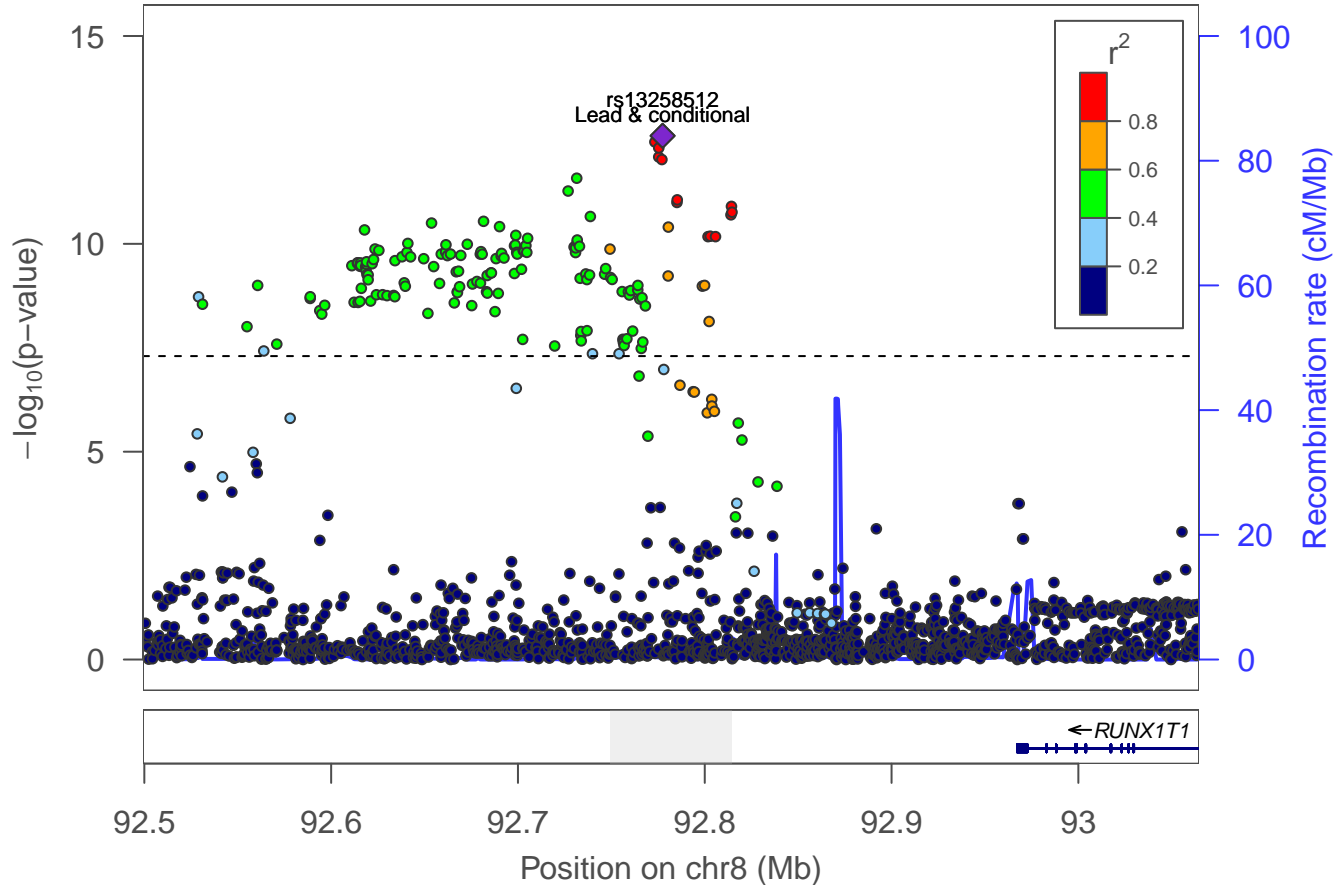

# Ever smoker: locus 103 [chr 8:93.190–93.245Mb]

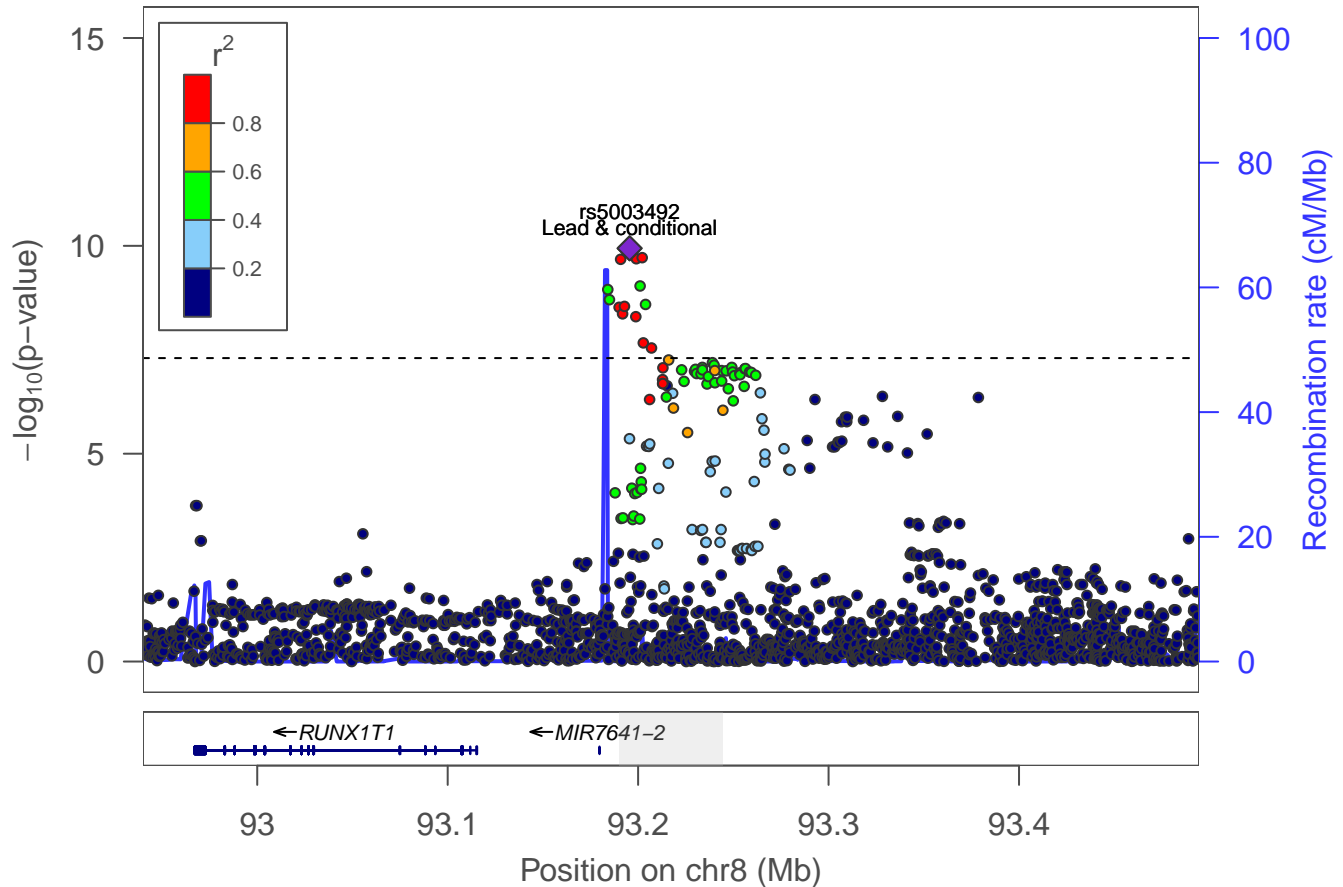

# Ever smoker: locus 104 [chr 8:141.609–142.018Mb]

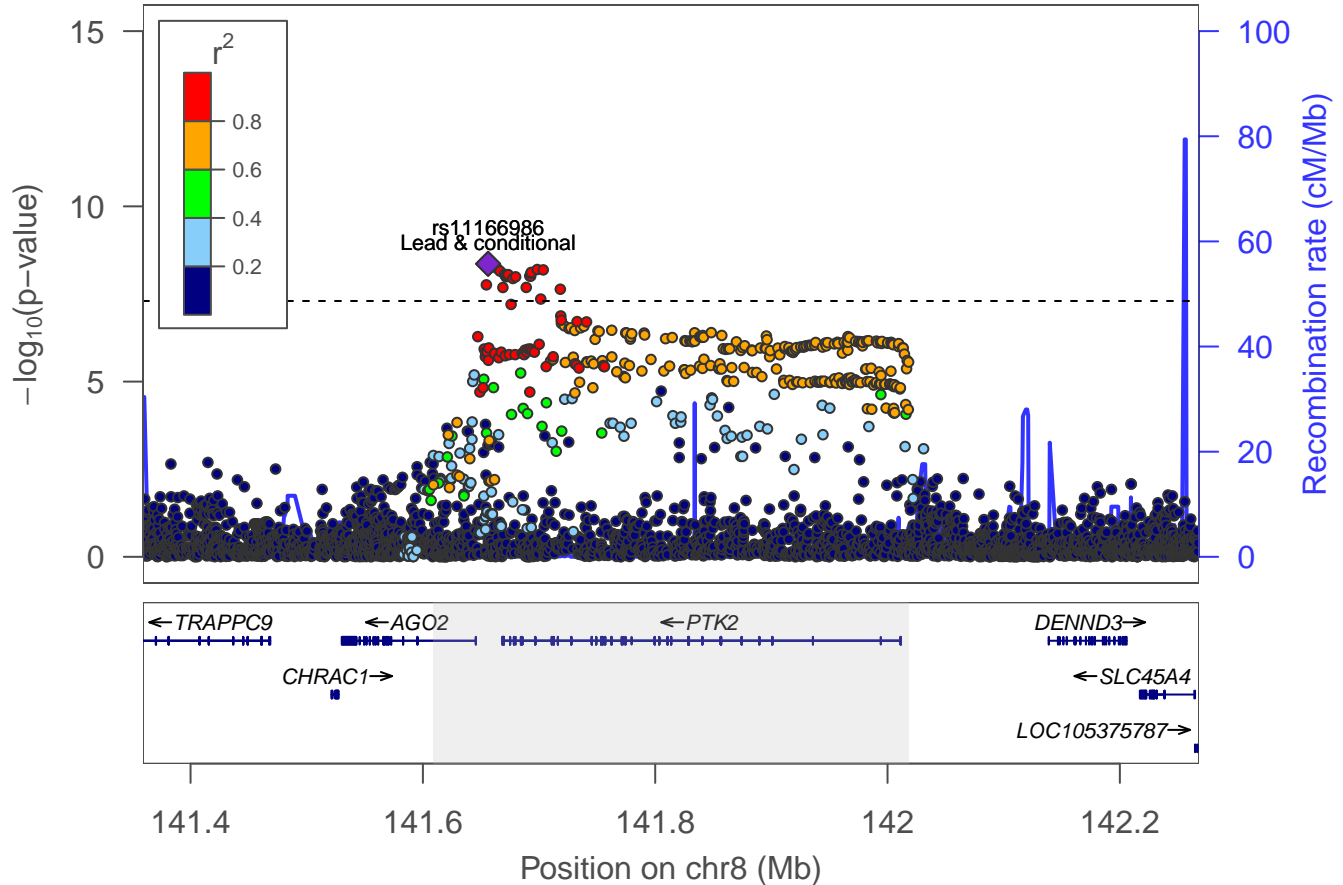

# Ever smoker: locus 105 [chr 9:3.012–3.025Mb]

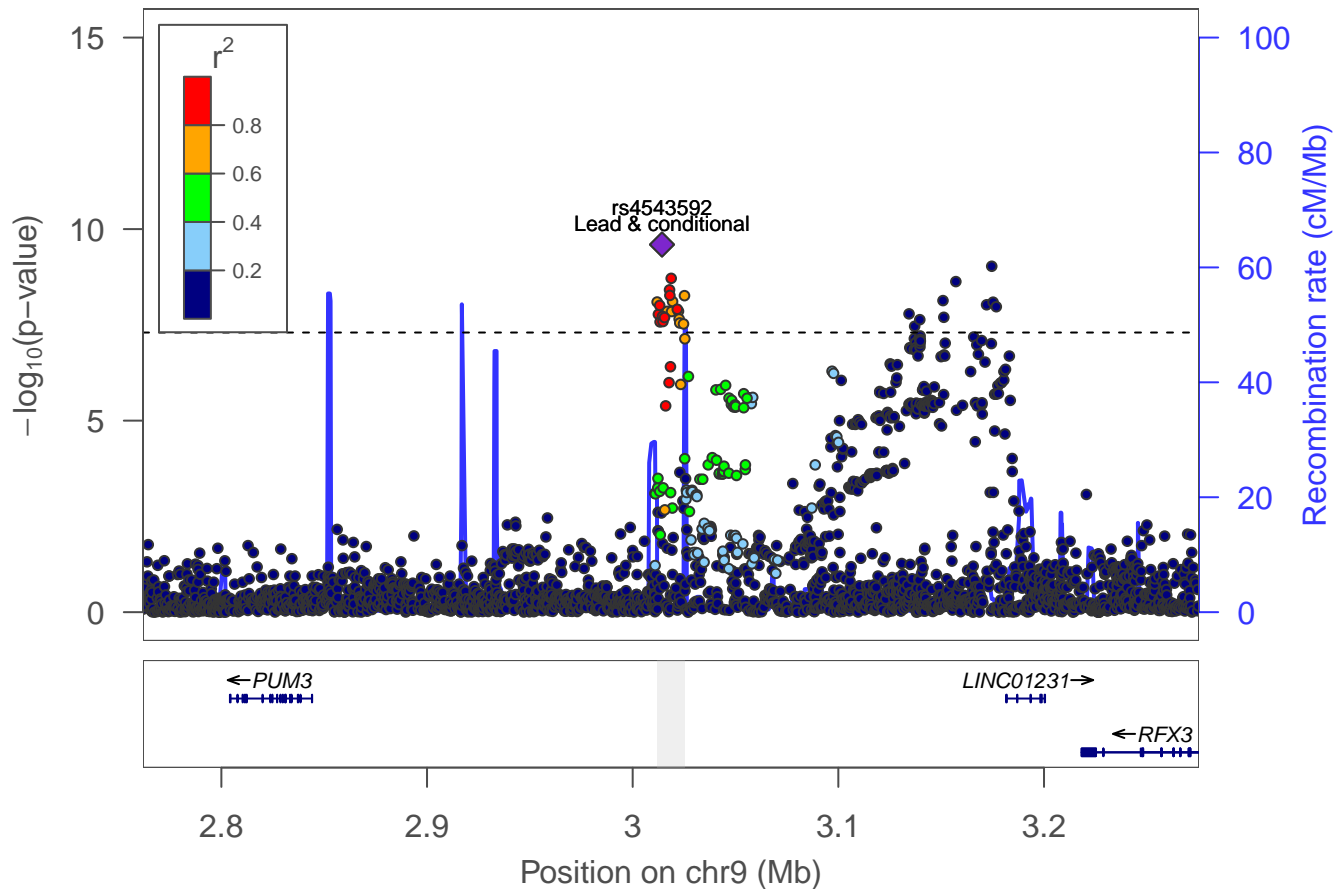

# Ever smoker: Locus 106 [chr 9: 10.963–11.254Mb]

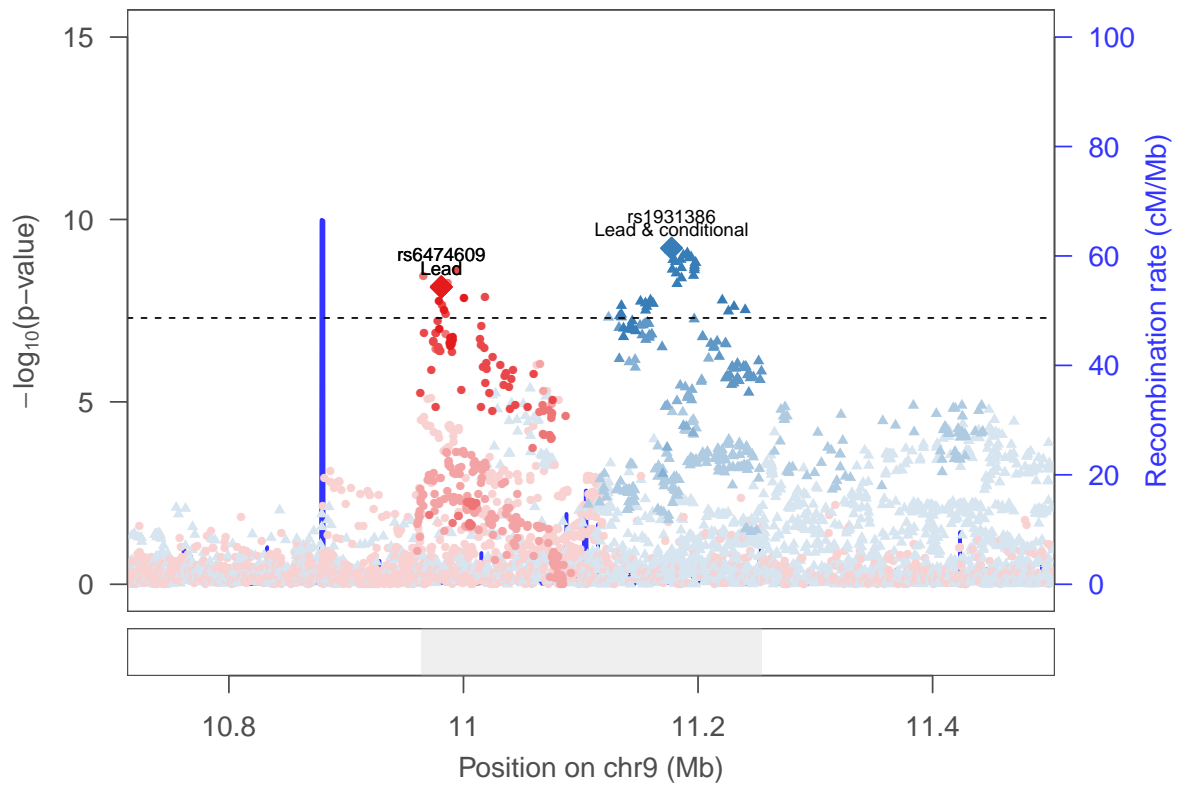

rs1931386 ▲  
rs6474609 ●

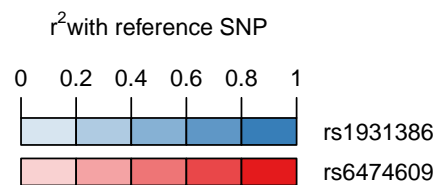

# Ever smoker: locus 107 [chr 9:31.875–32.115Mb]

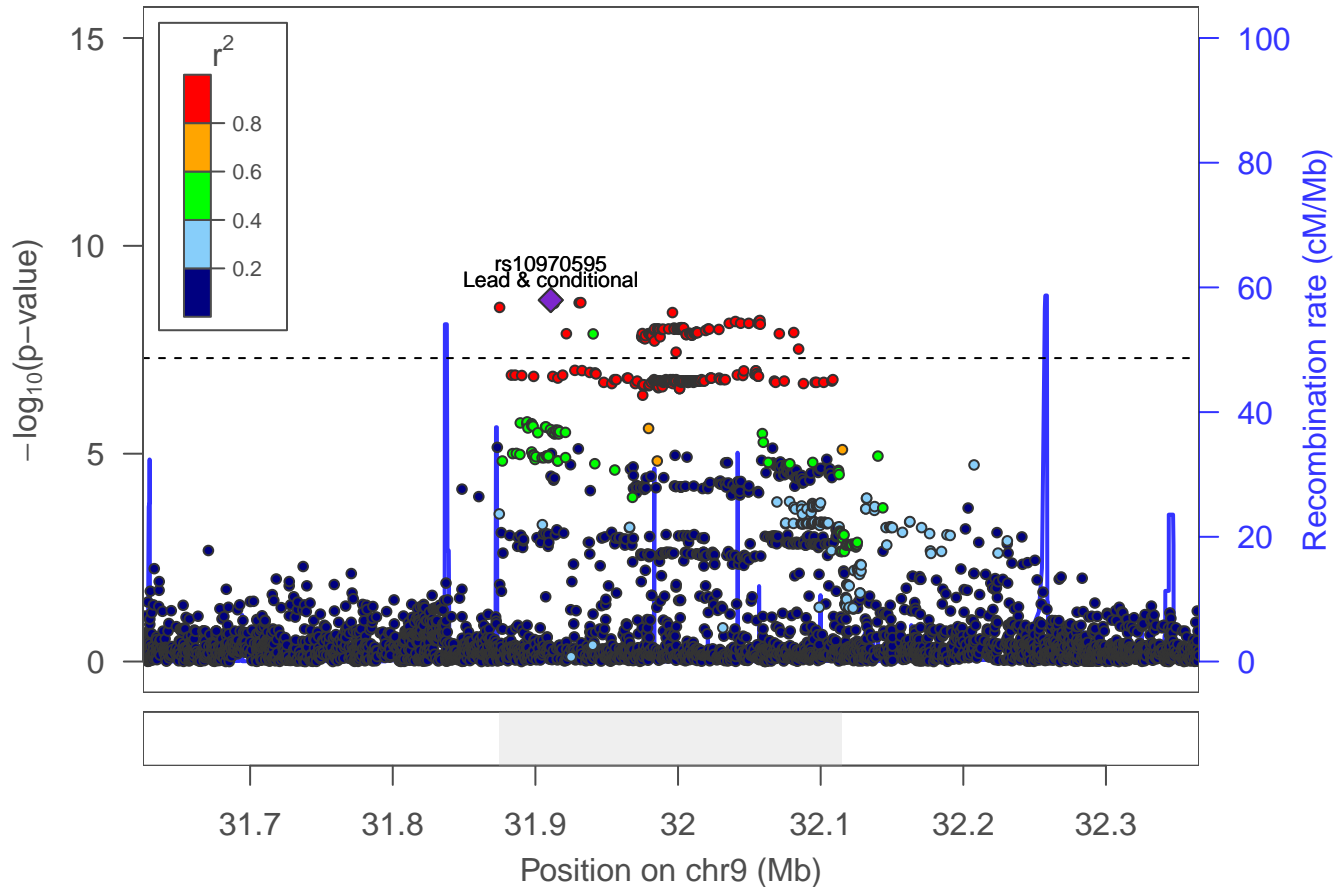



# Ever smoker: locus 108 [chr 9:38.254–38.287Mb]

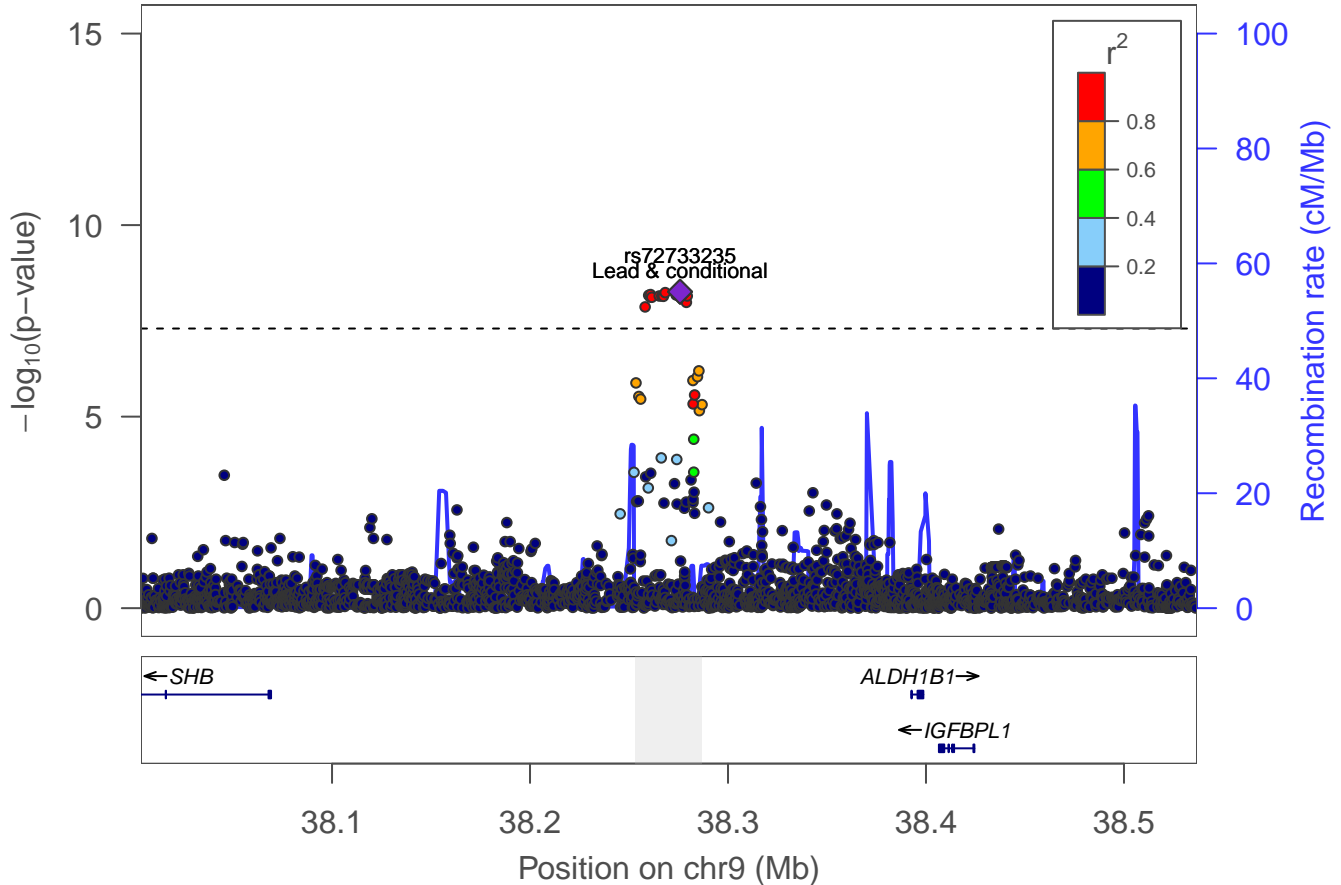

# Ever smoker: Locus 109 [chr 9: 86.701–86.762Mb]

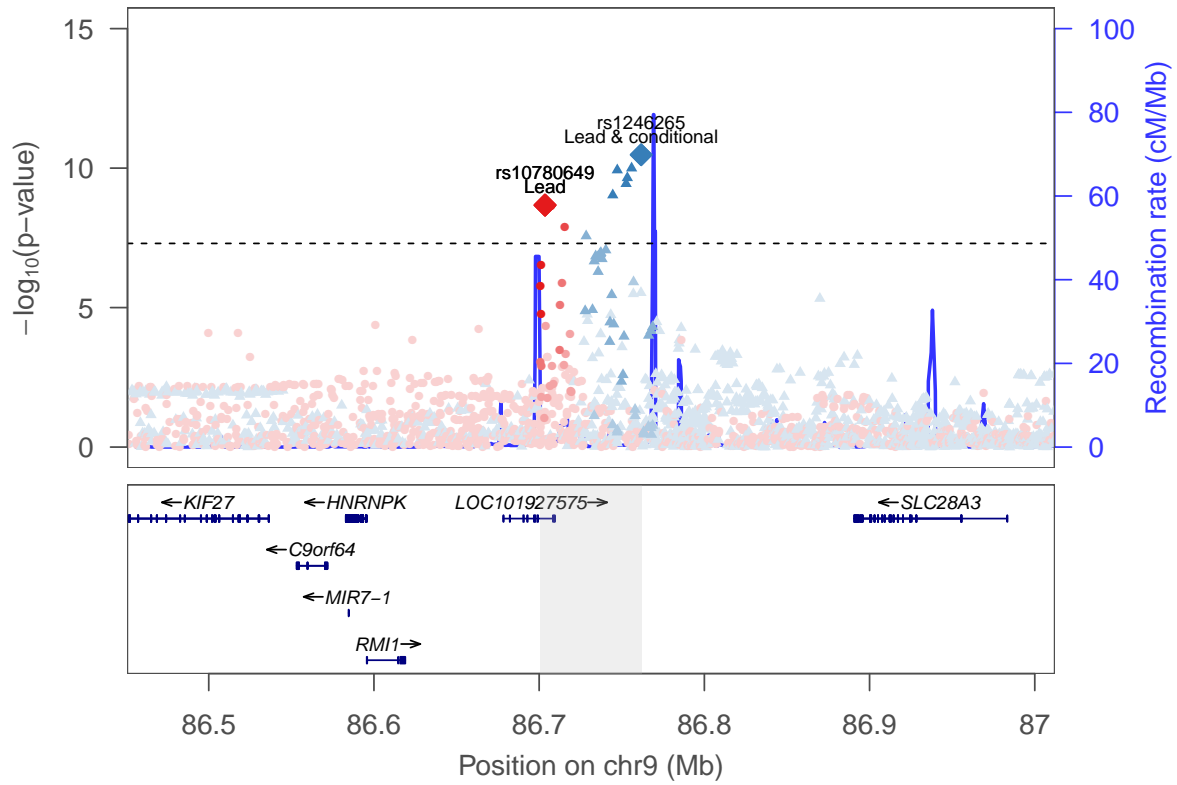

rs1246265 ▲  
rs10780649 ●

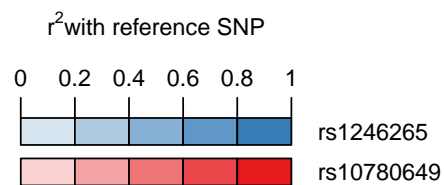

# Ever smoker: locus 110 [chr 9:102.080–102.162Mb]

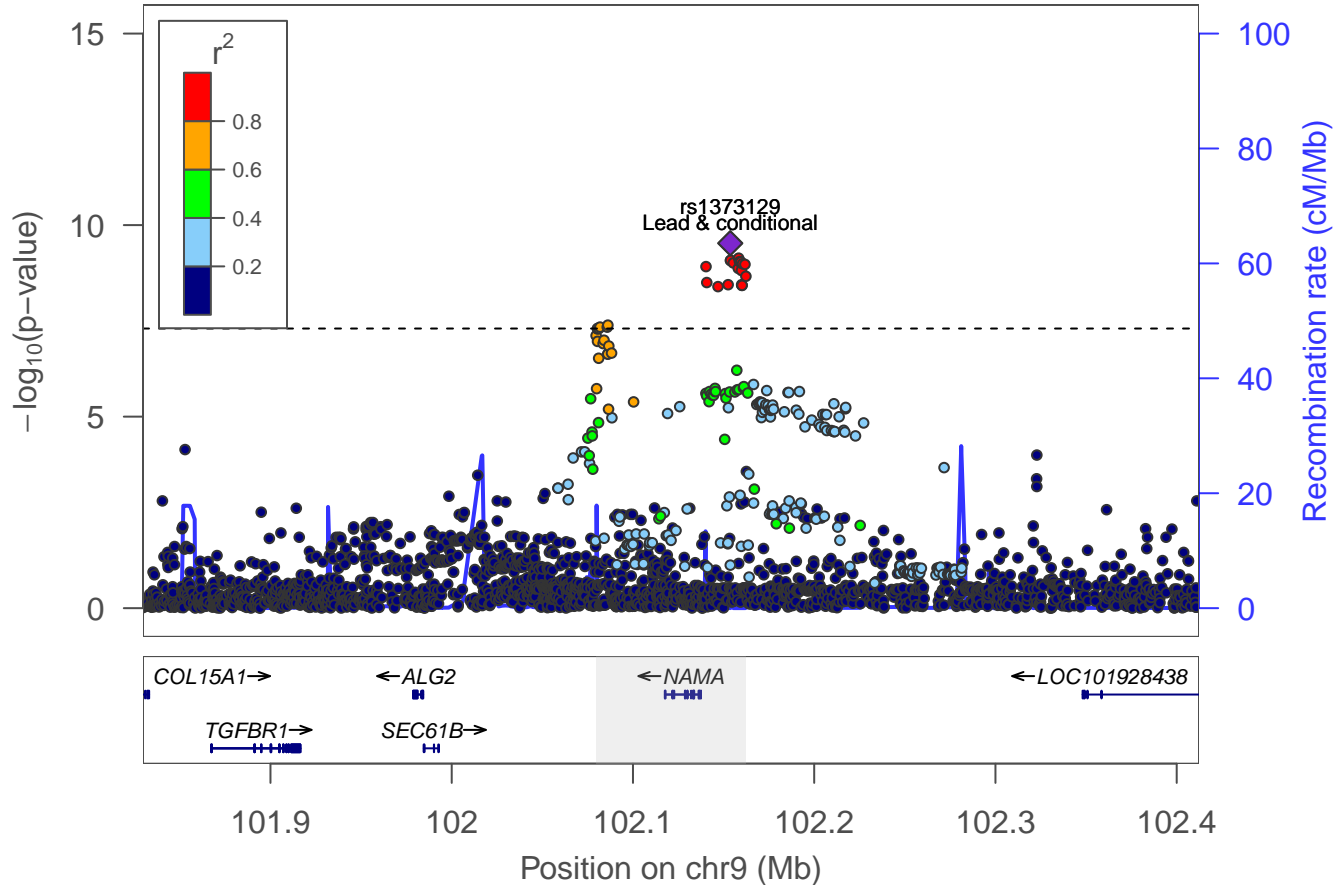

# Ever smoker: locus 111 [chr 9:109.302–109.395Mb]

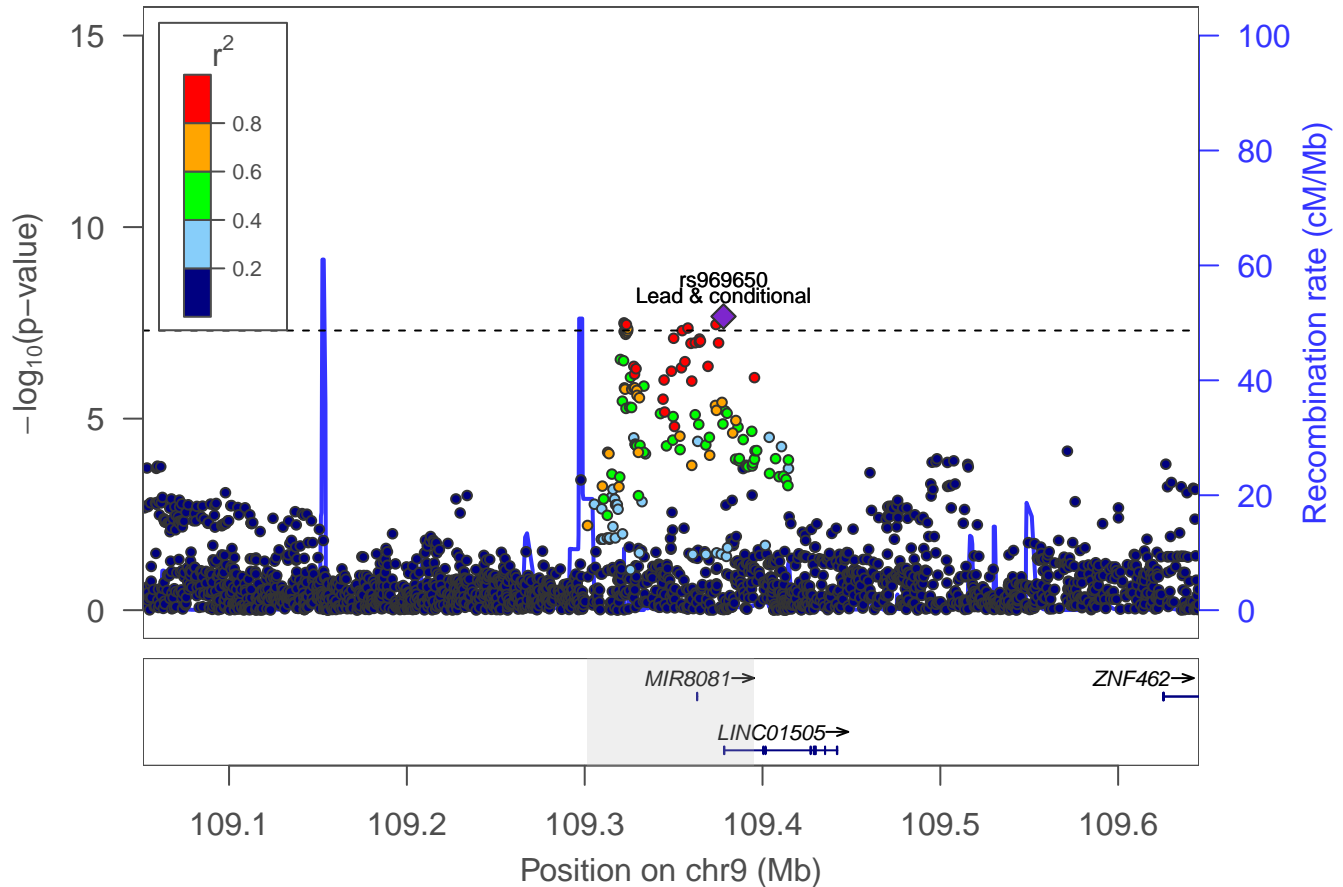

# Ever smoker: locus 112 [chr 9:122.040–122.117Mb]

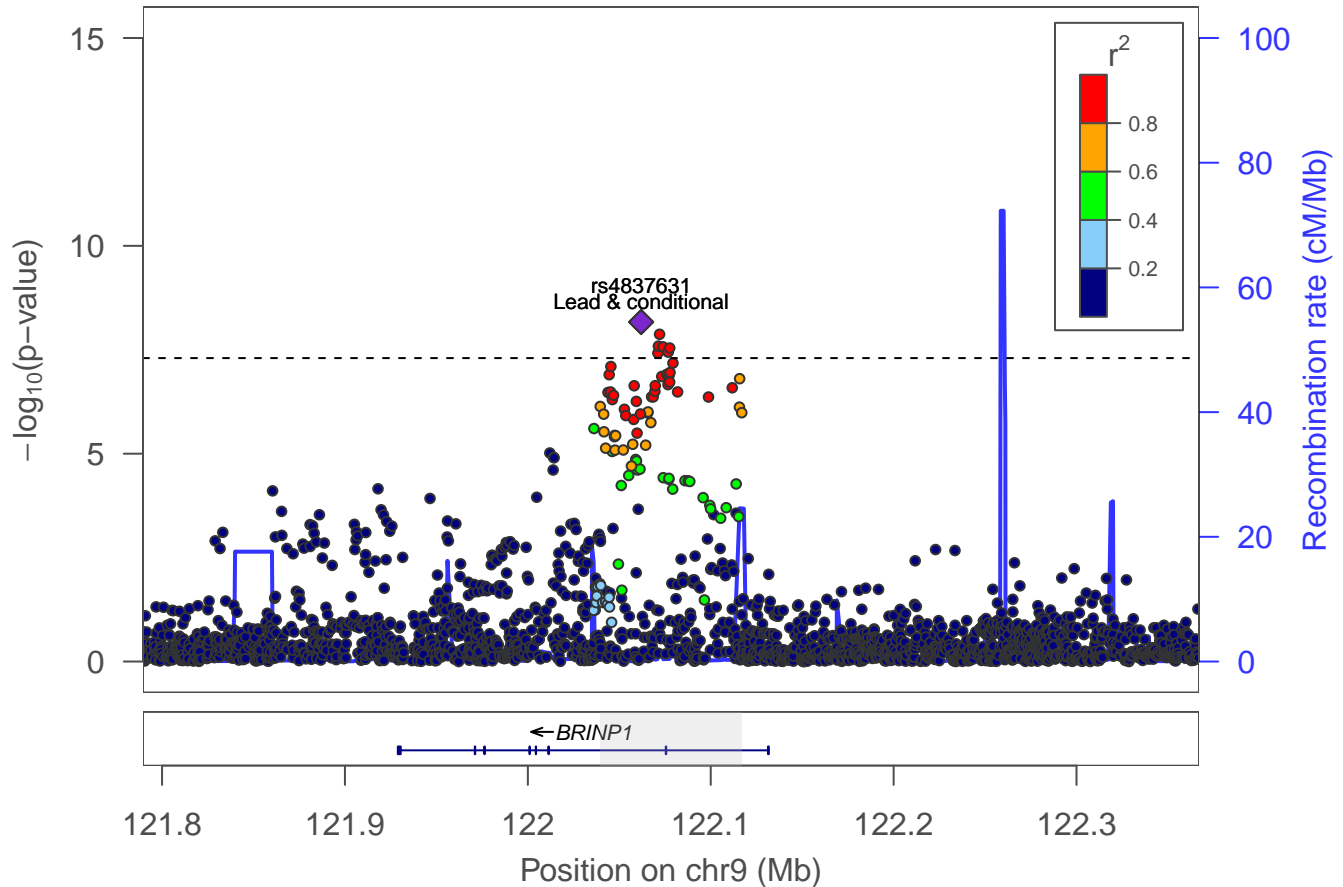

# Ever smoker: locus 113 [chr 9:128.011–128.149Mb]

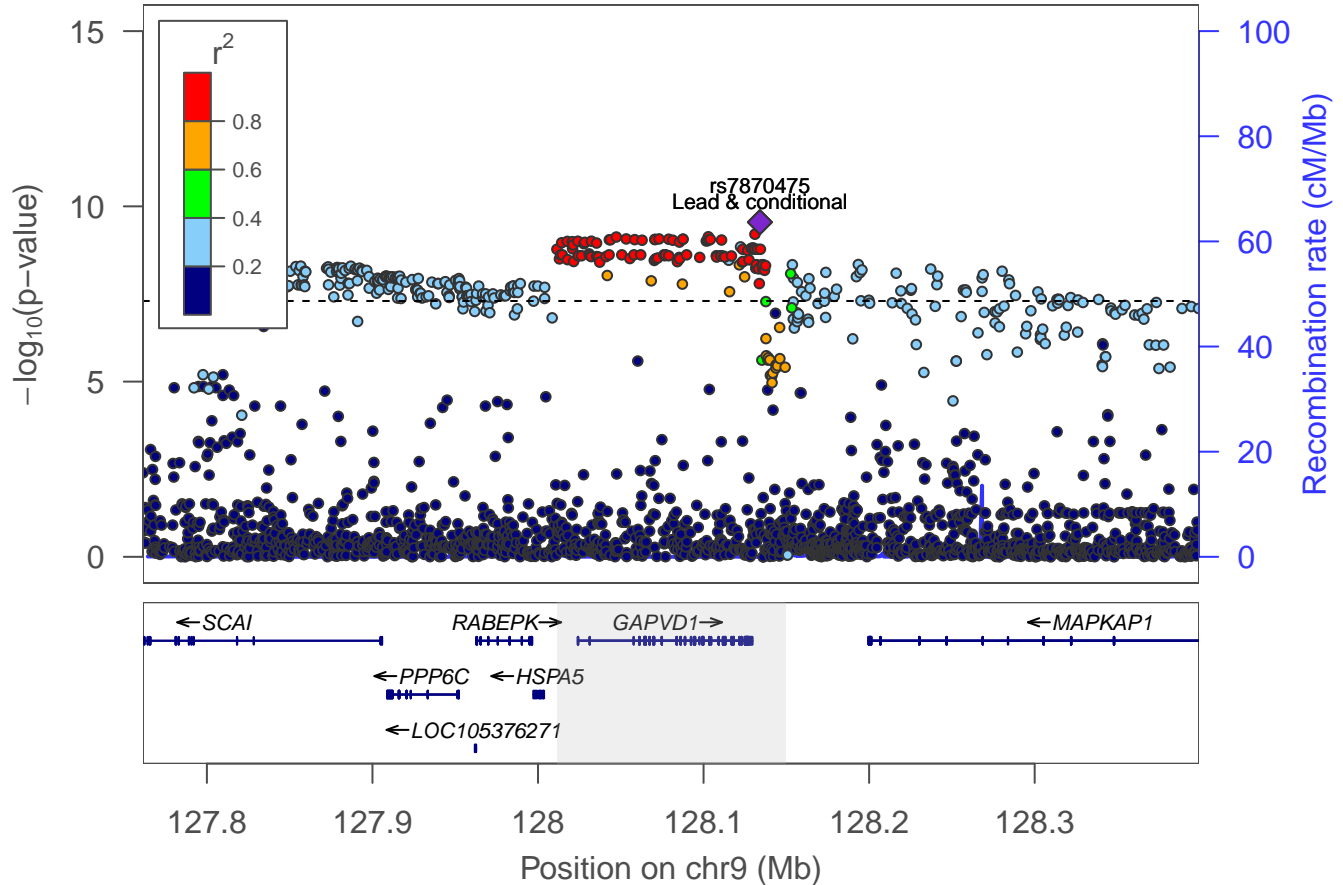

# Ever smoker: locus 114 [chr 9:137.971–137.979Mb]

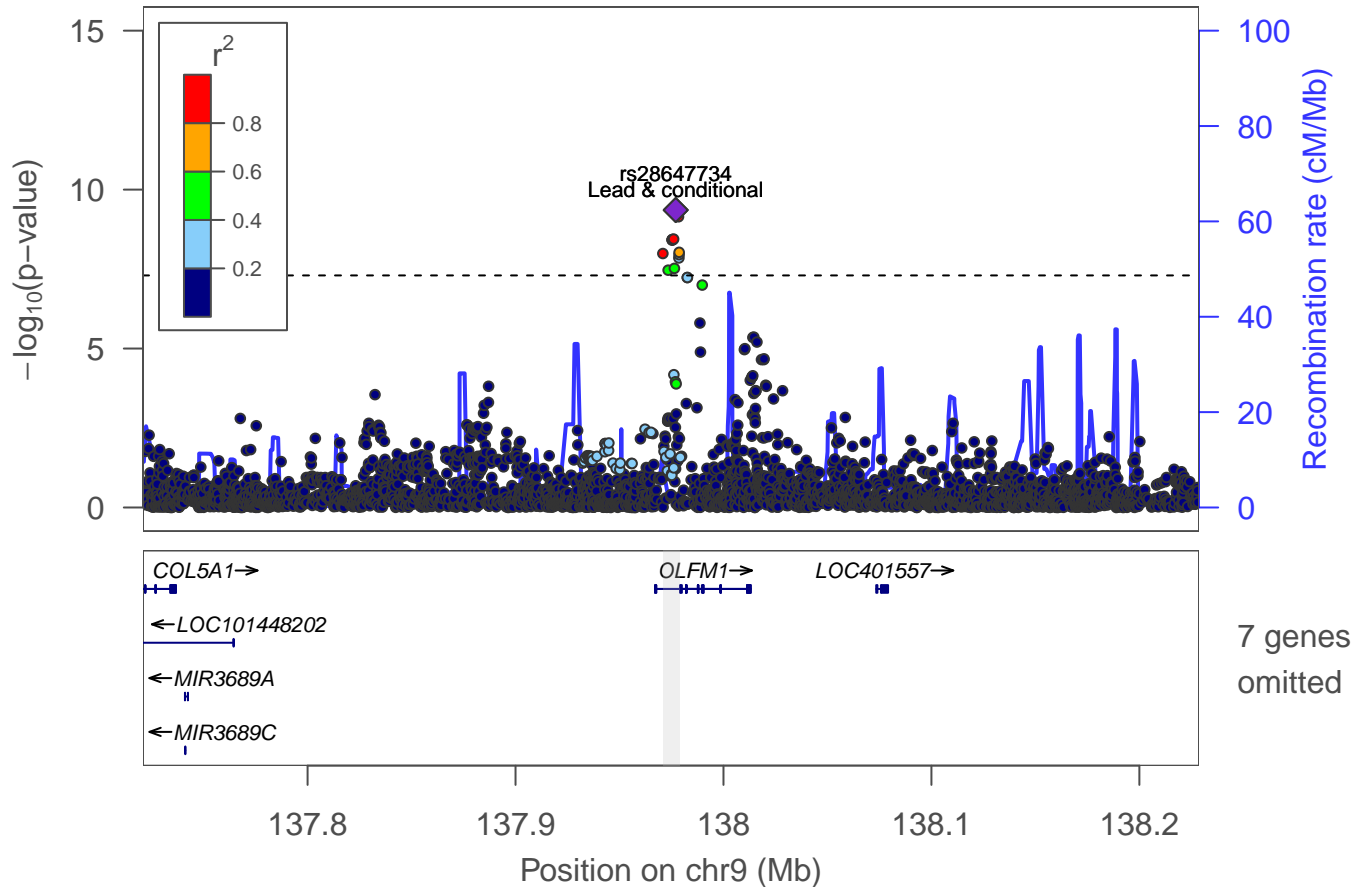

# Ever smoker: locus 115 [chr 10:8.779–8.853Mb]

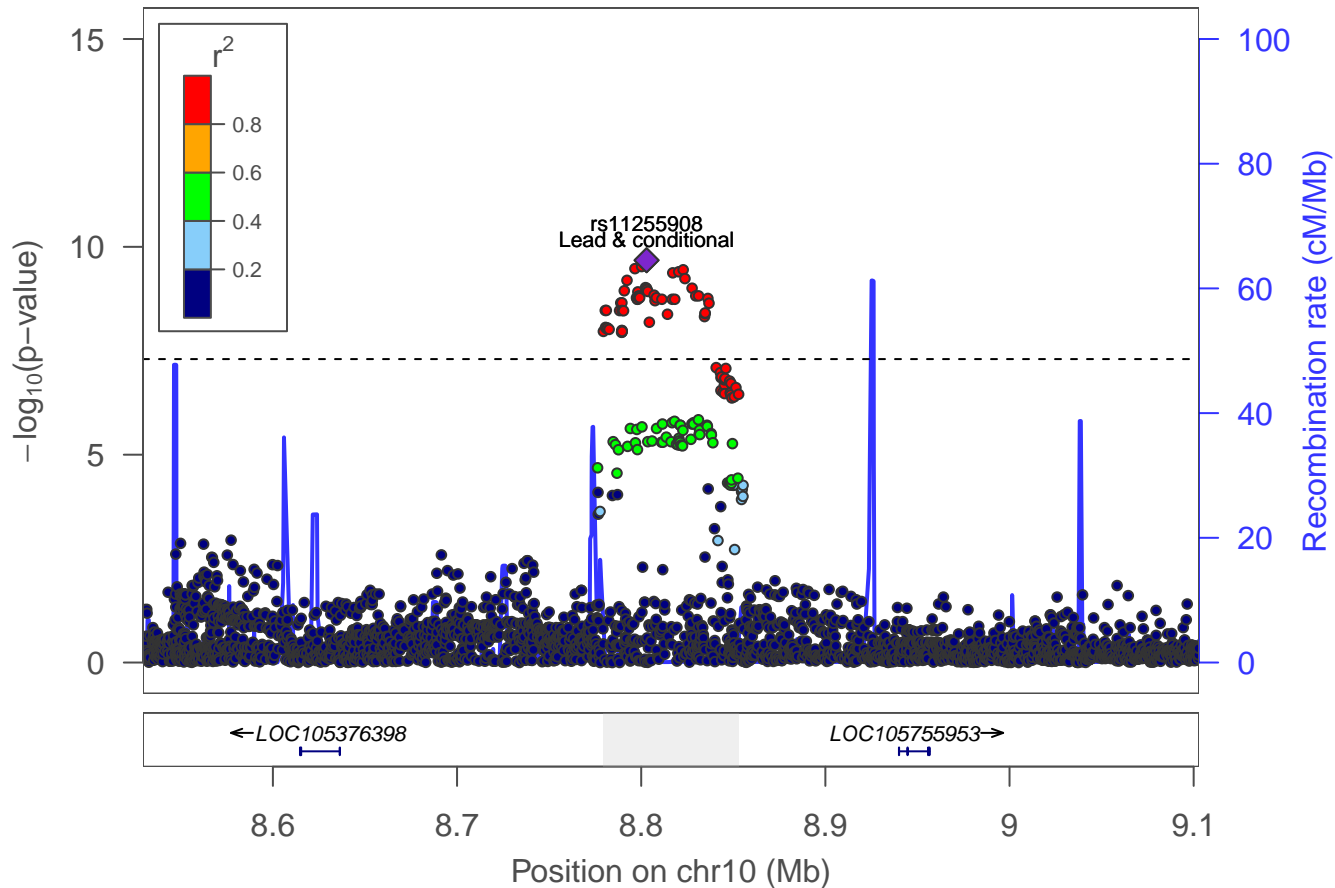



# Ever smoker: locus 116 [chr 10:13.533–13.577Mb]

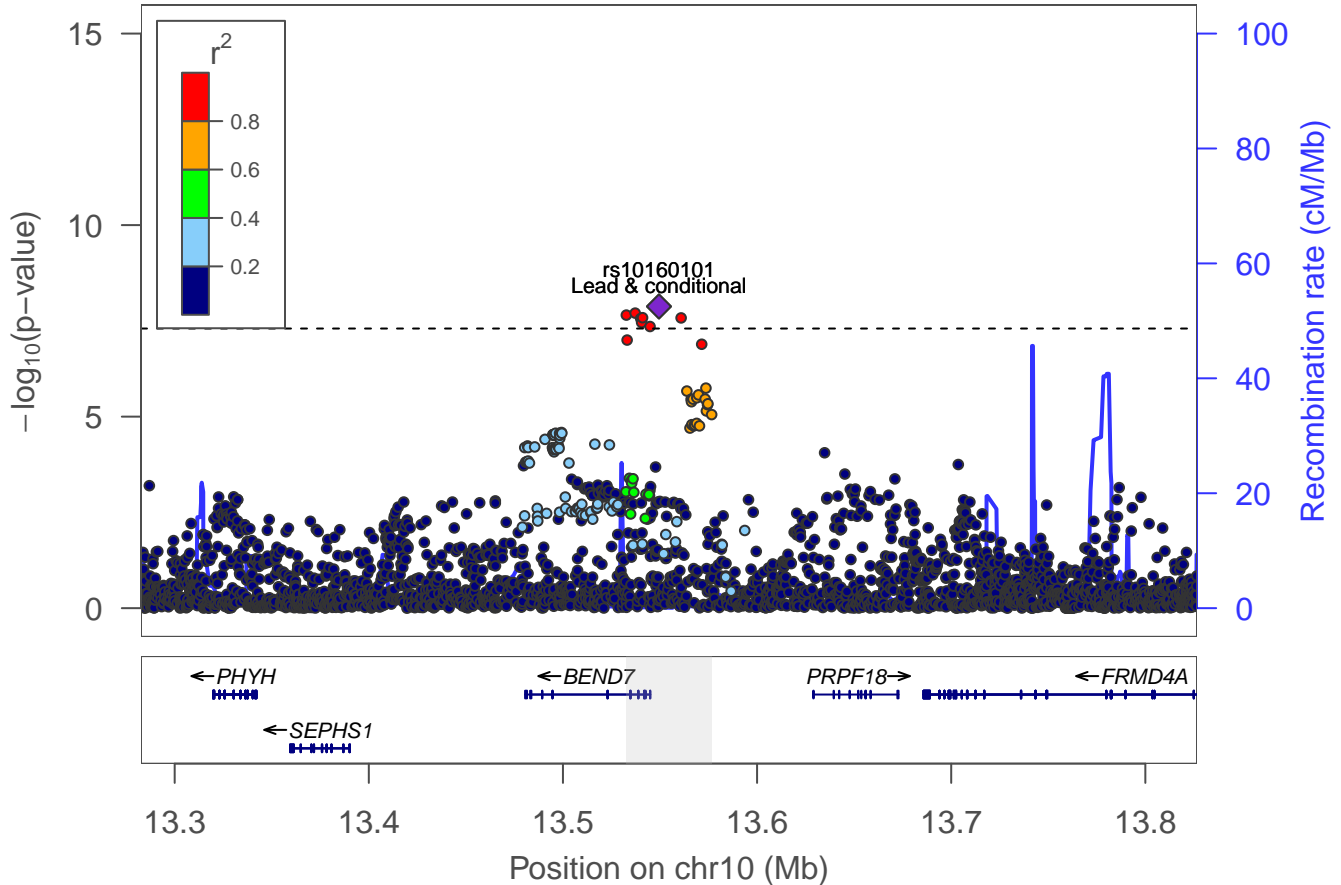

# Ever smoker: locus 117 [chr 10:21.790–22.288Mb]

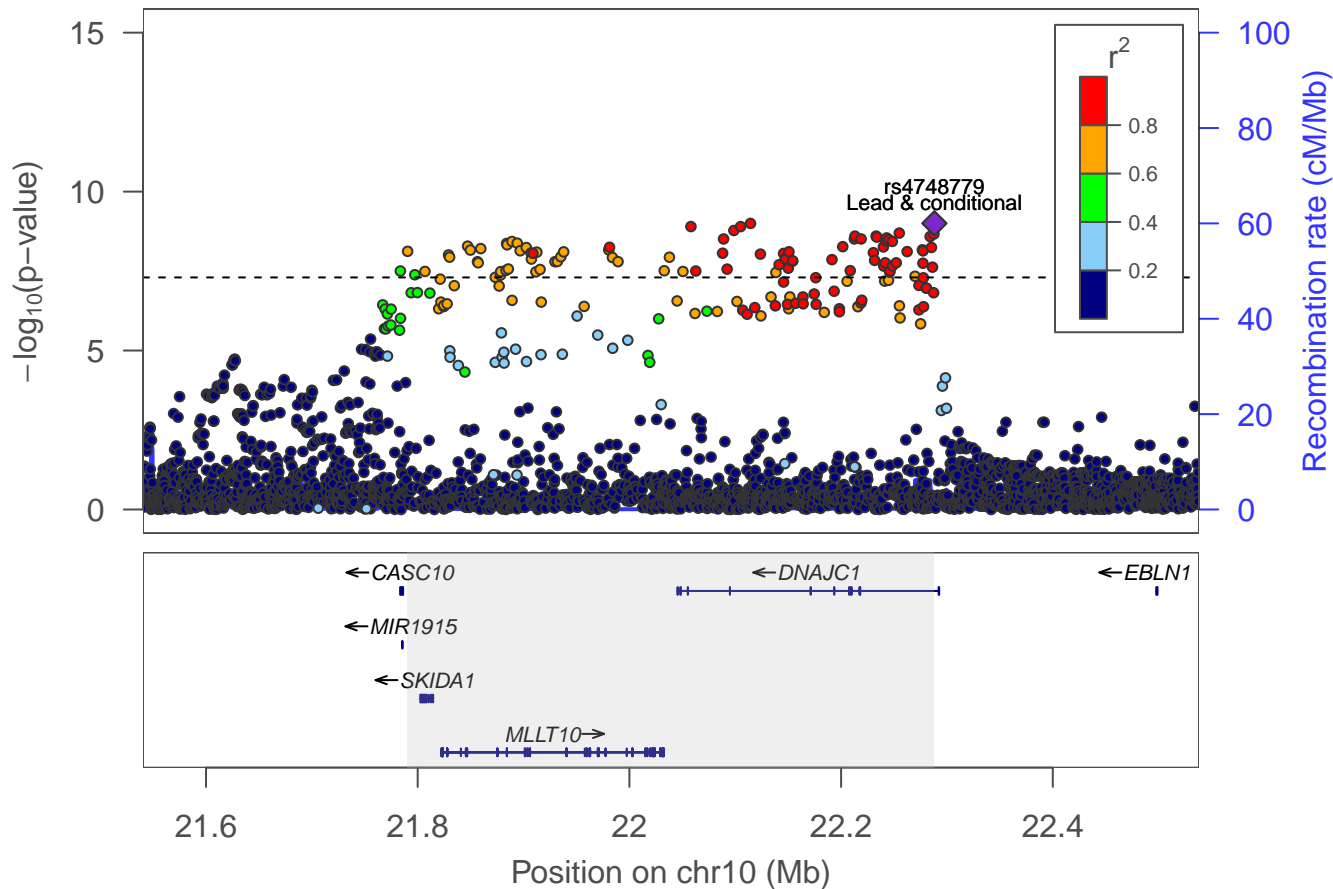

# Ever smoker: locus 118 [chr 10:56.631–56.709Mb]

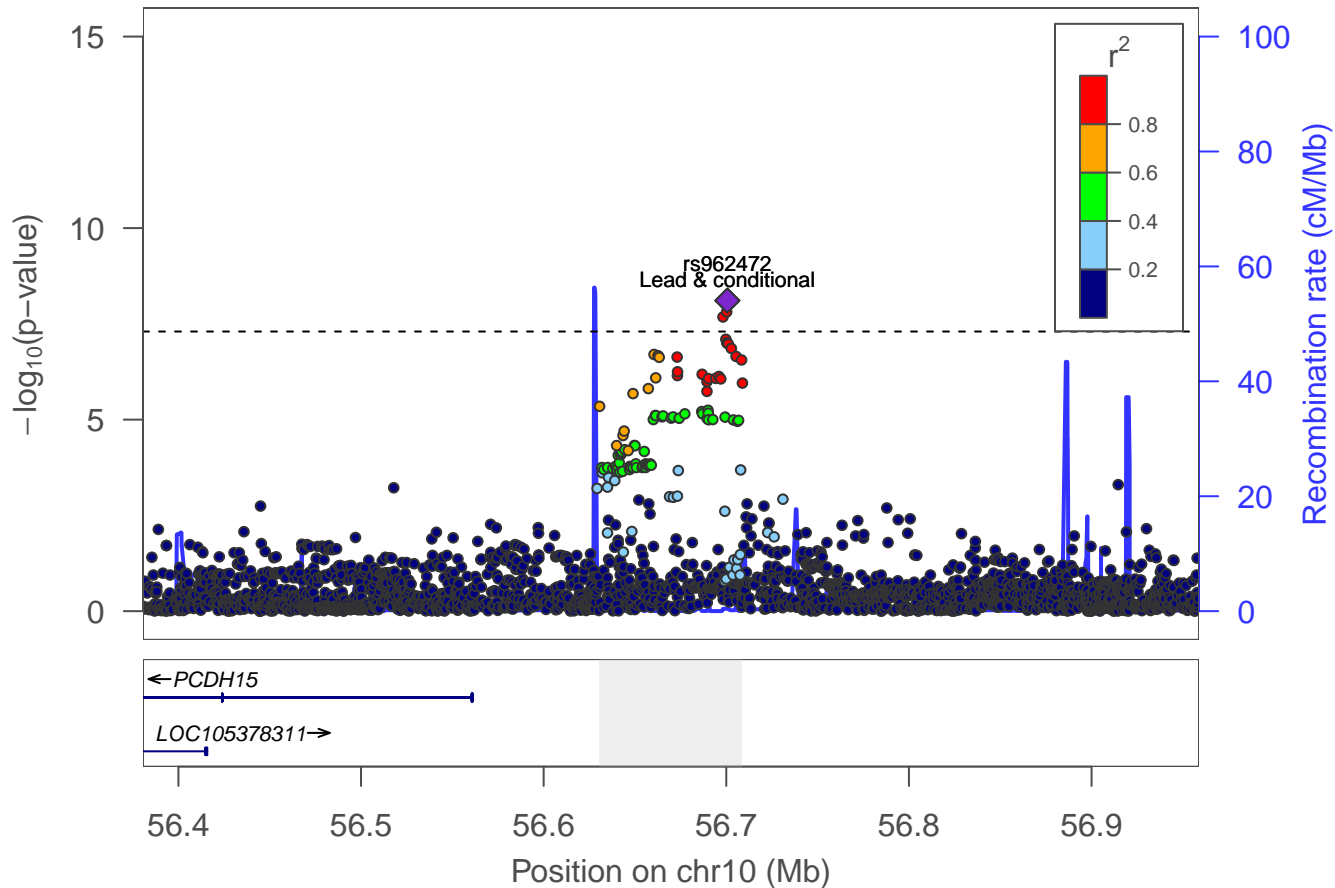

# Ever smoker: Locus 119 [chr 10: 63.557–63.681Mb]

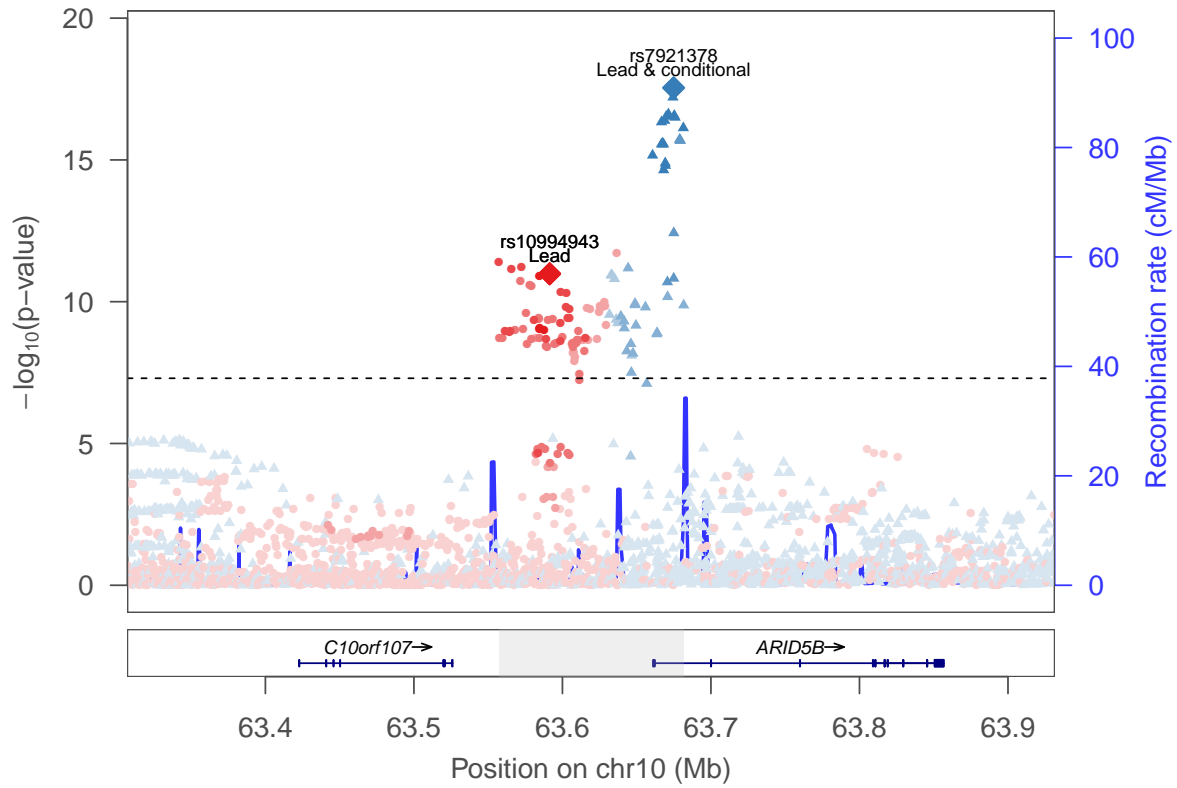

rs7921378 ▲  
rs10994943 ●

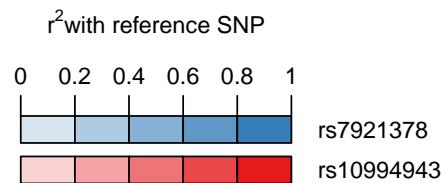

# Ever smoker: locus 120 [chr 10:87.318–87.648Mb]

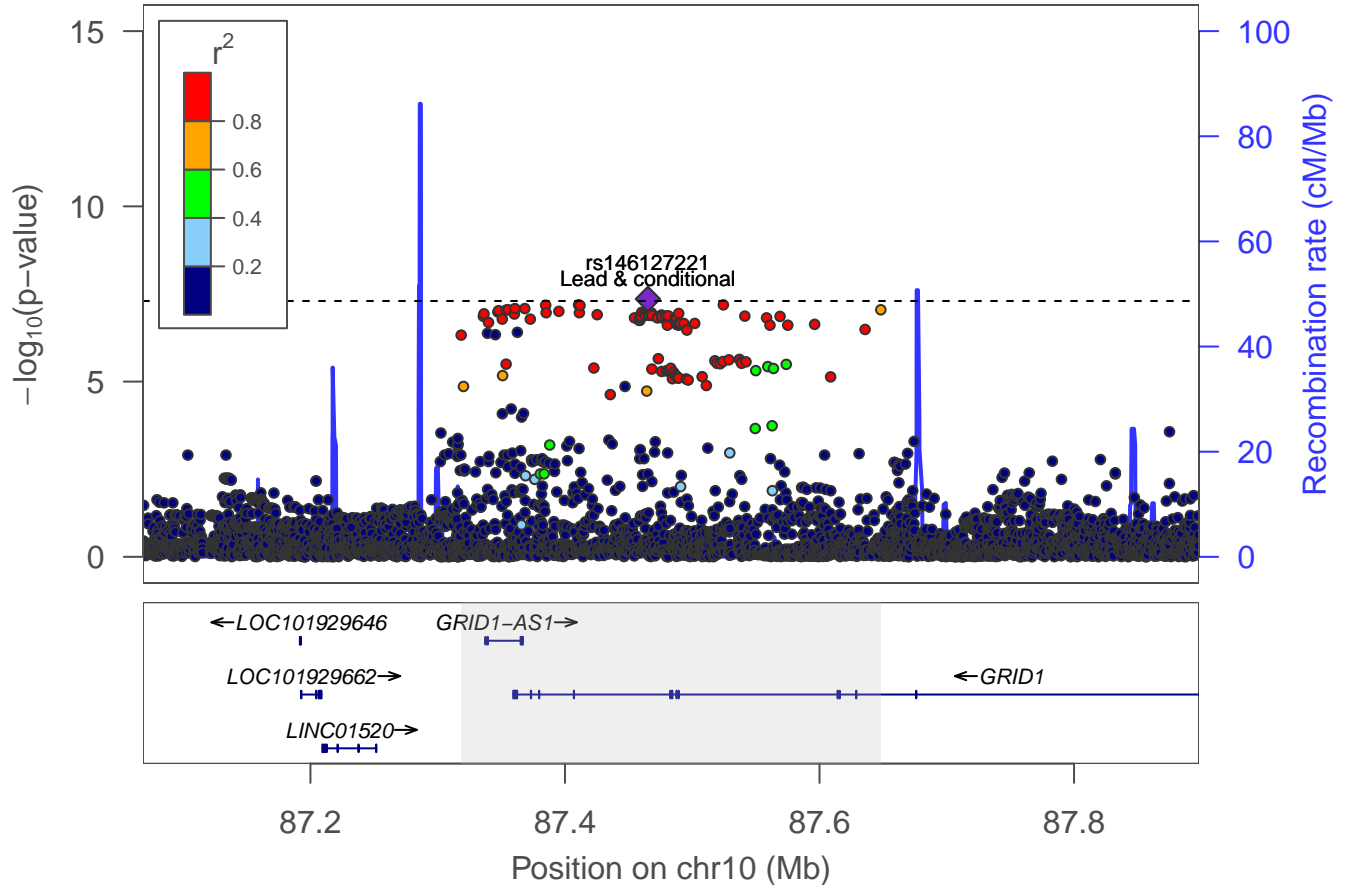

# Ever smoker: locus 121 [chr 10:103.116–103.315Mb]

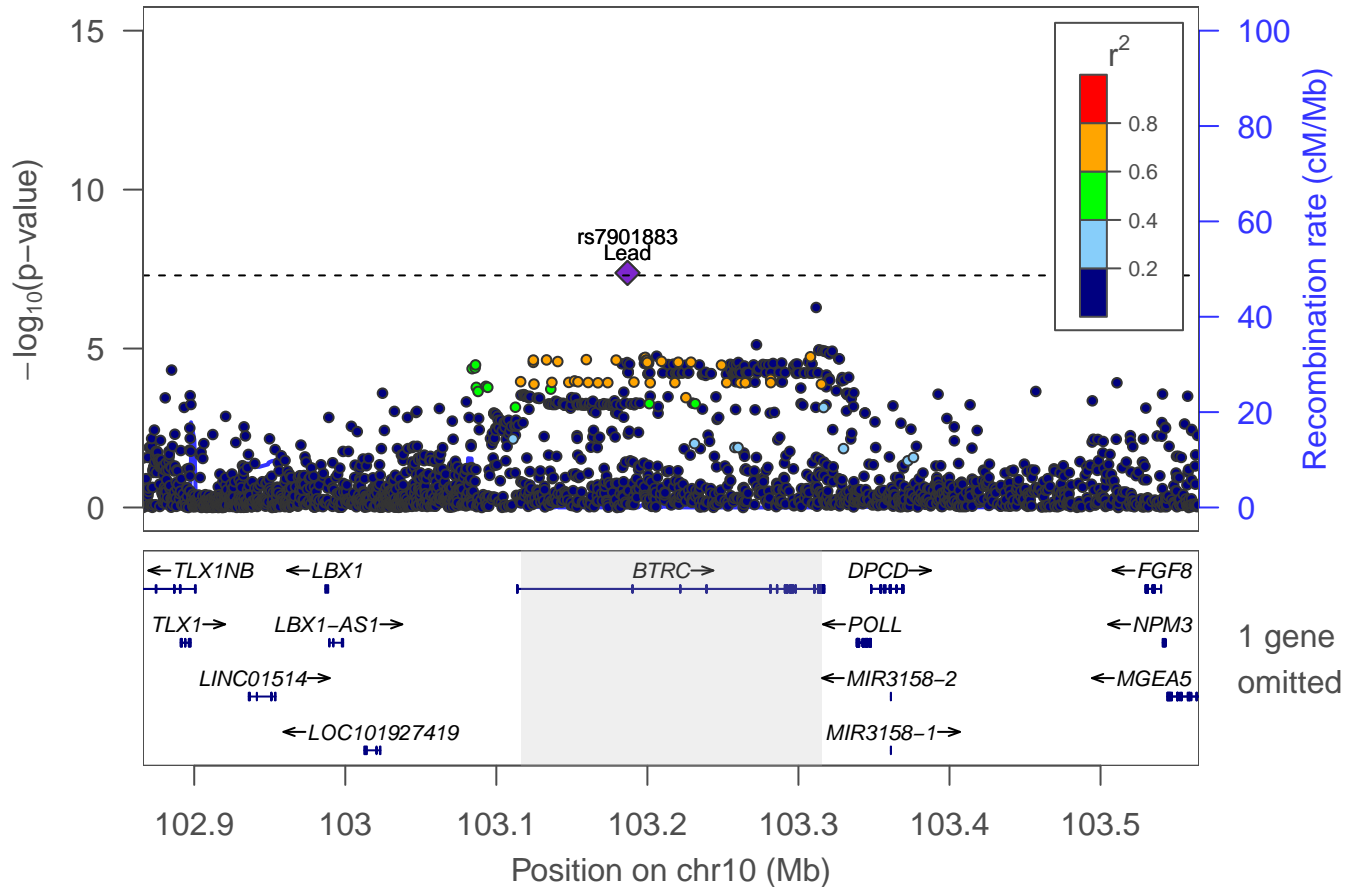



# Ever smoker: locus 123 [chr 10:115.363–115.487Mb]

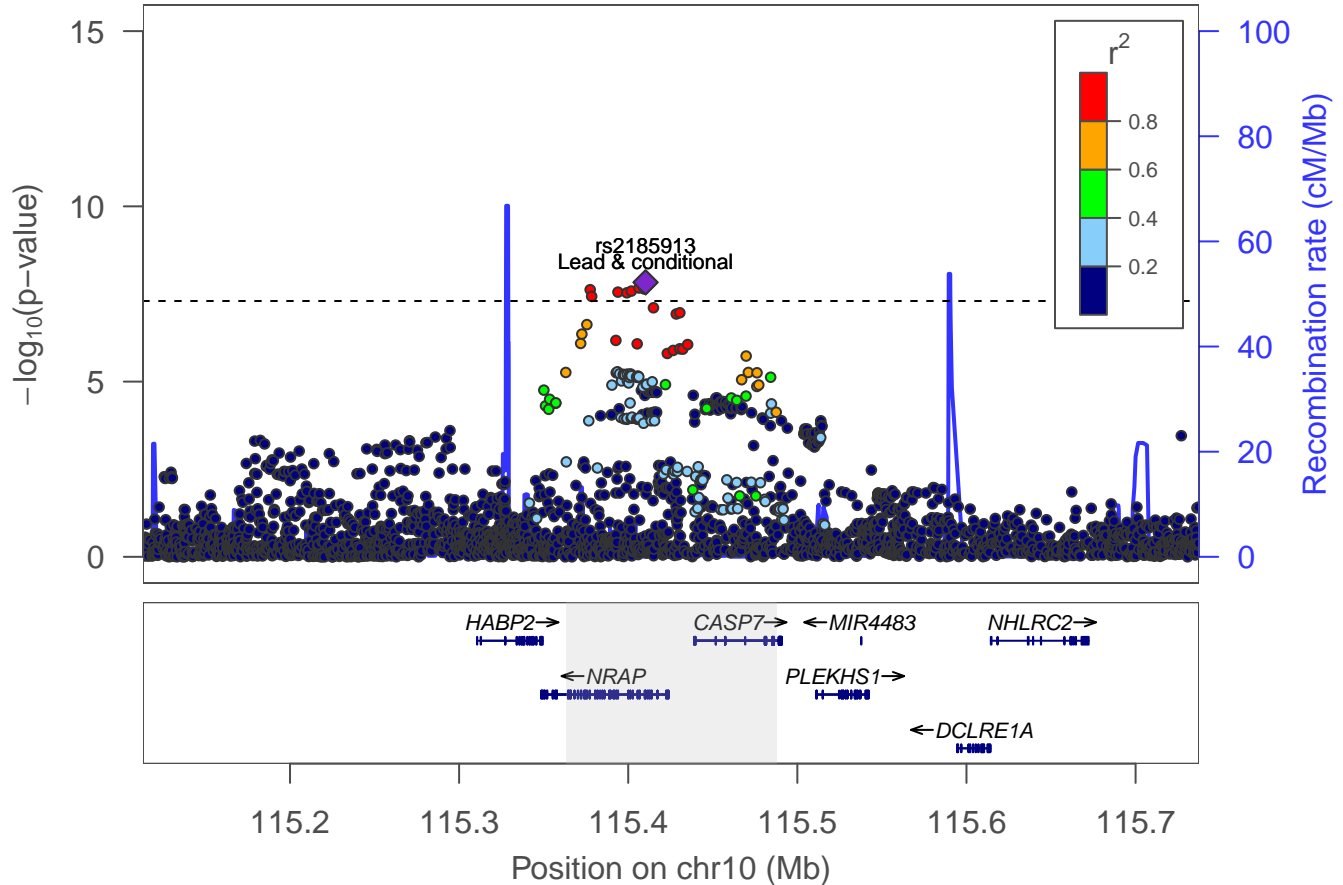





# Ever smoker: locus 125 [chr 11:4.659–4.664Mb]

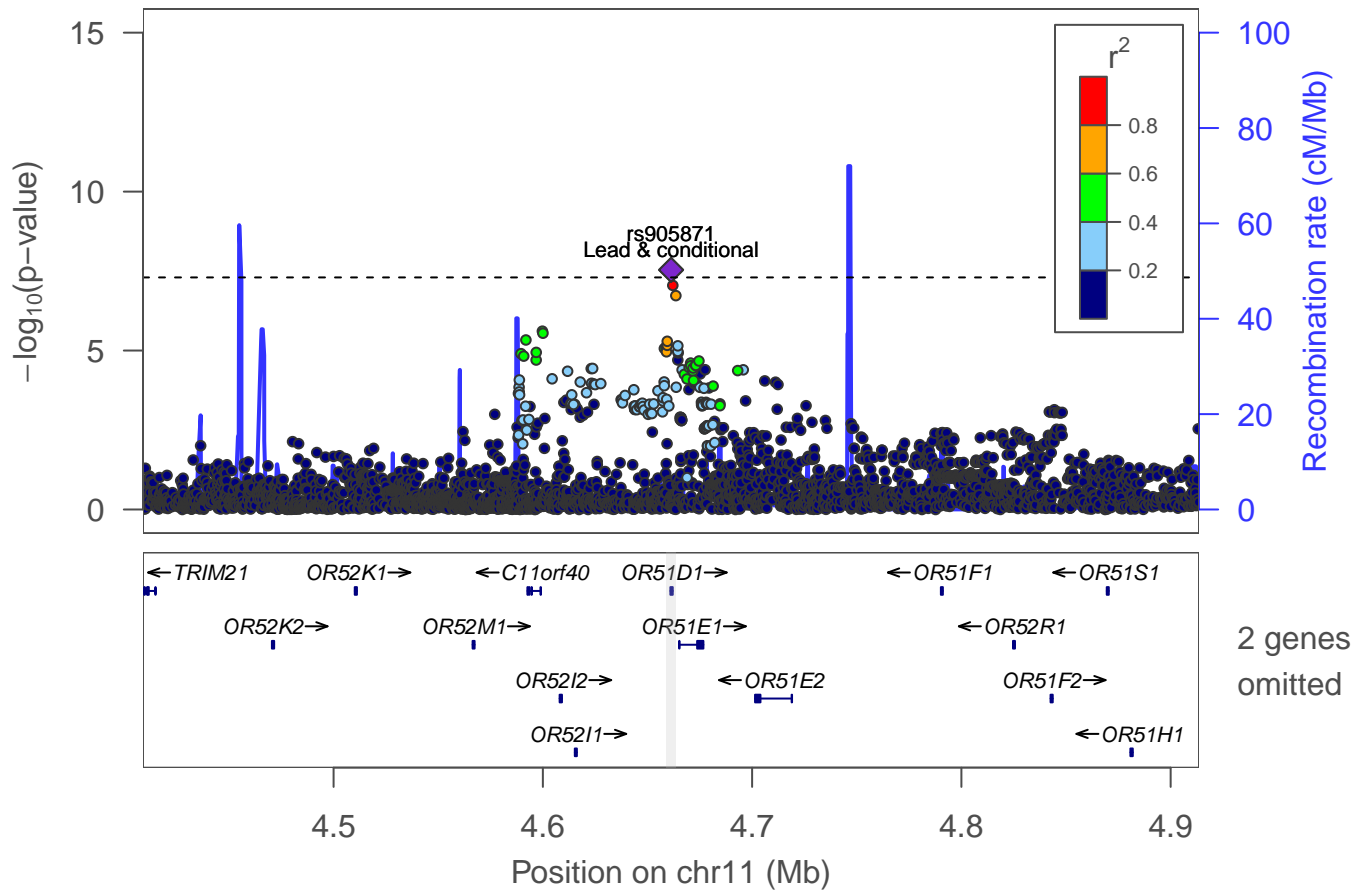

# Ever smoker: Locus 126 [chr 11: 17.038–17.305Mb]

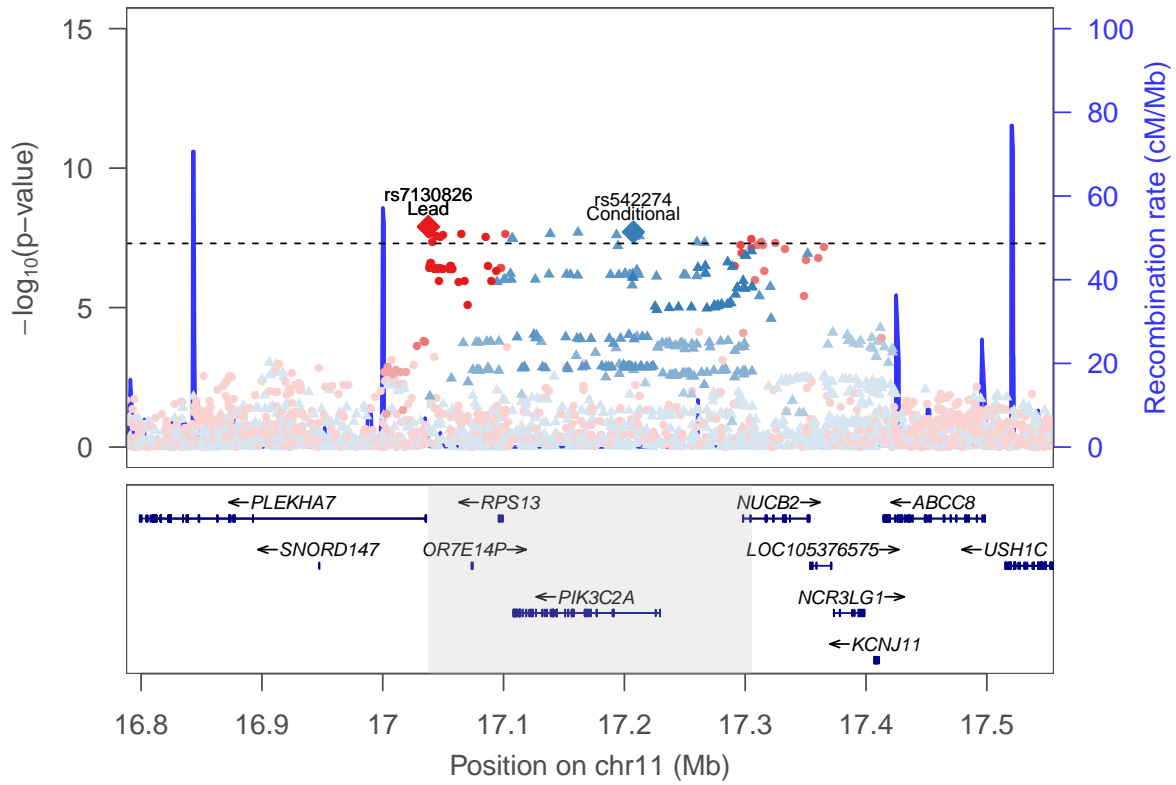

rs542274 ▲  
rs7130826 ●

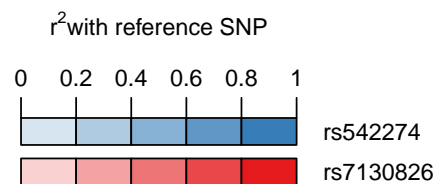

# Ever smoker: locus 127 [chr 11:20.129–20.129Mb]

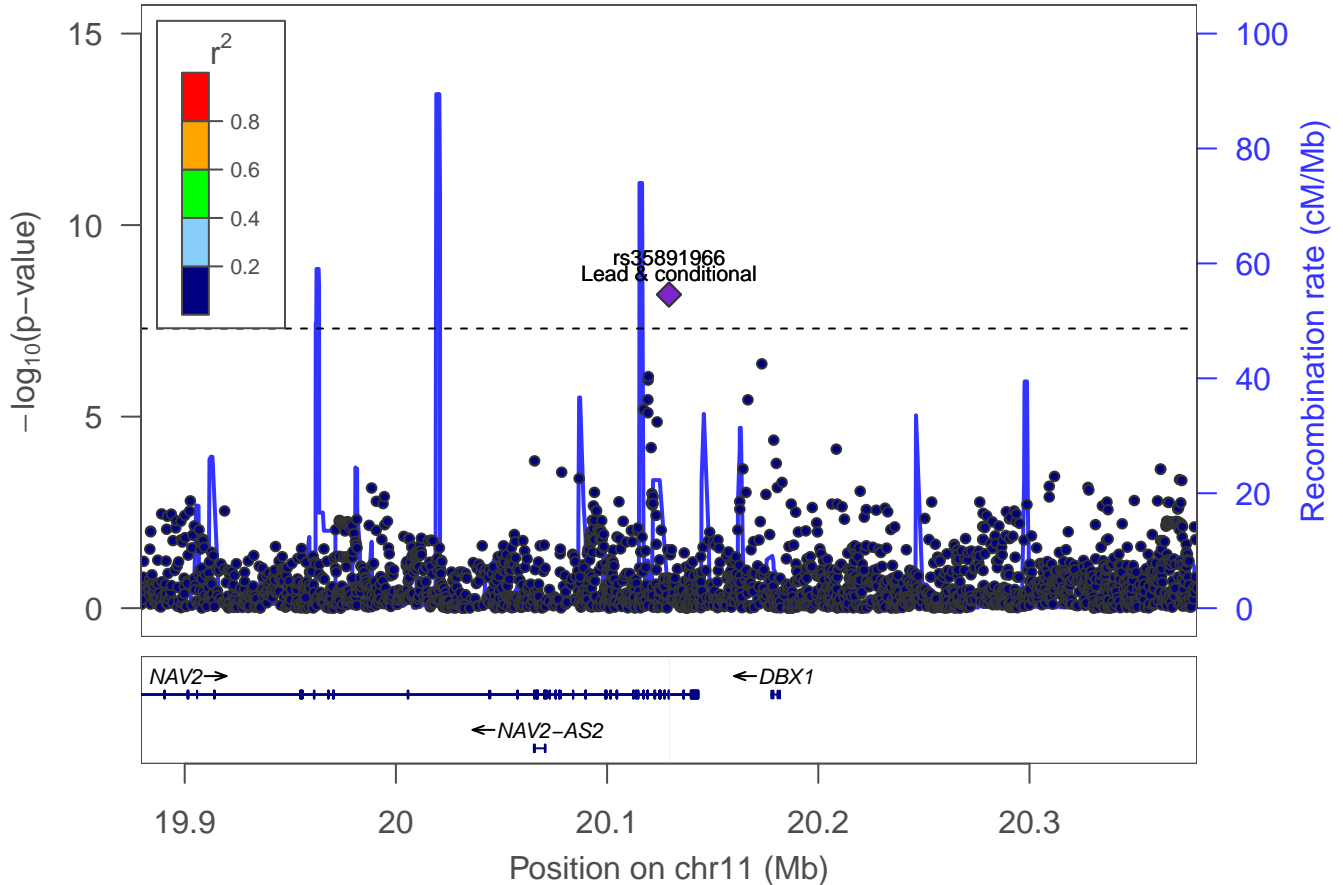

# Ever smoker: Locus 128 [chr 11: 27.542–27.748Mb]

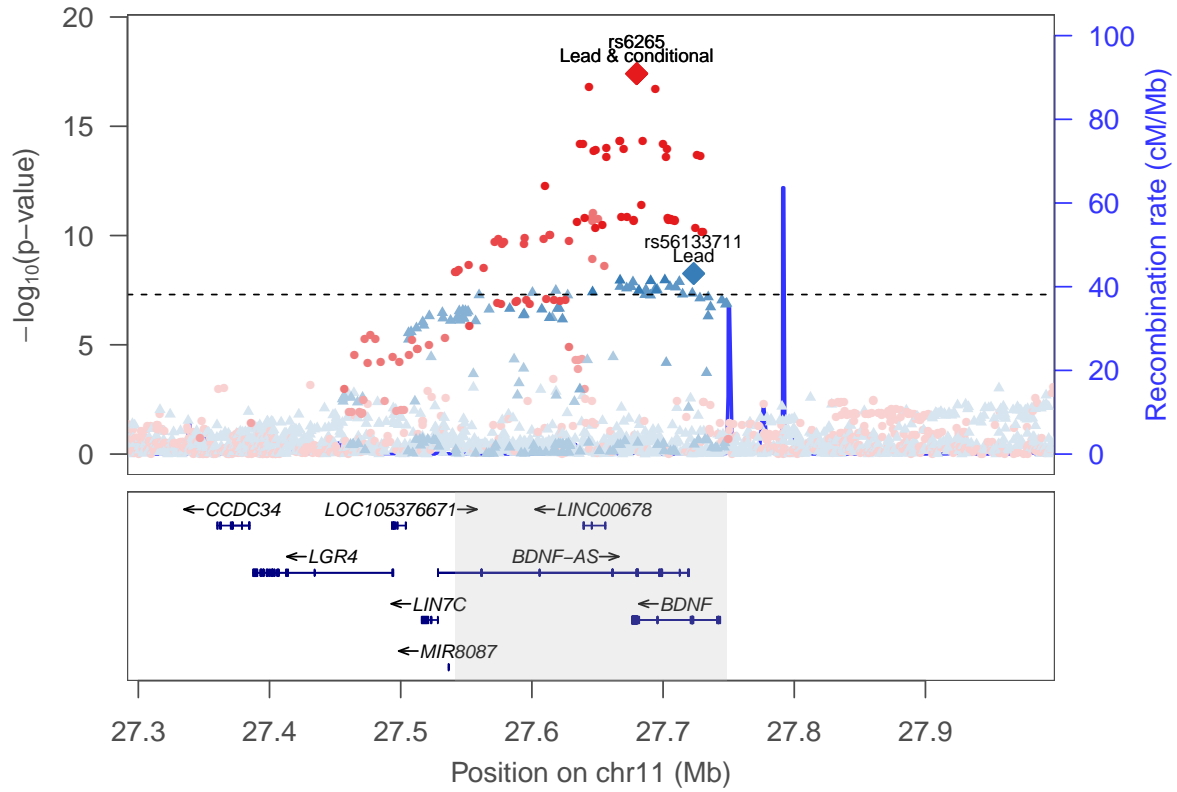

rs56133711 ▲  
rs6265 ●

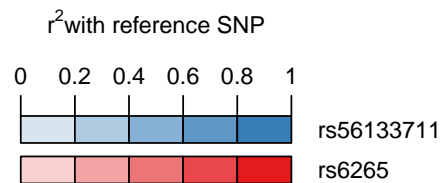

# Ever smoker: locus 129 [chr 11:28.591–28.694Mb]

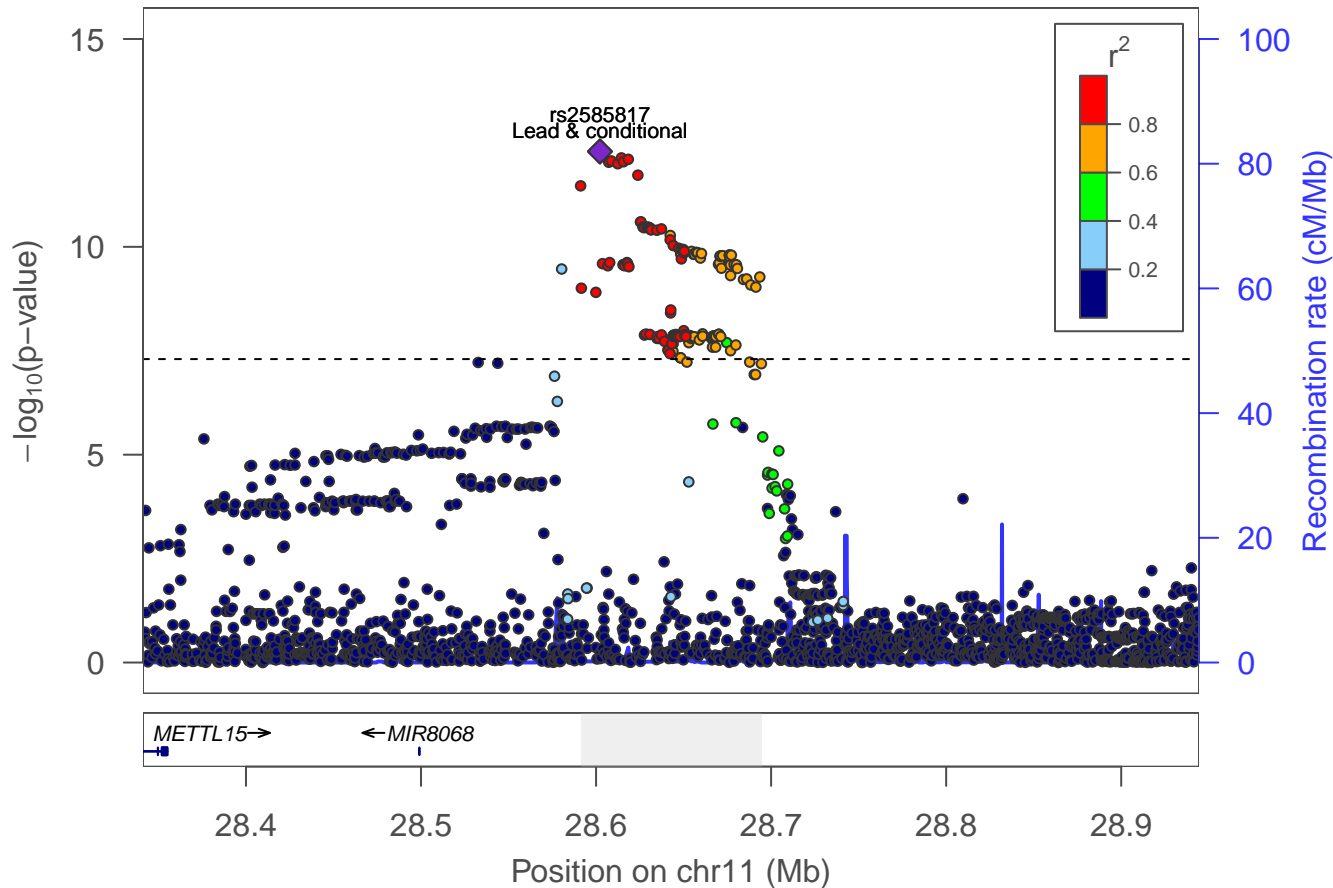

# Ever smoker: locus 130 [chr 11:41.415–41.445Mb]

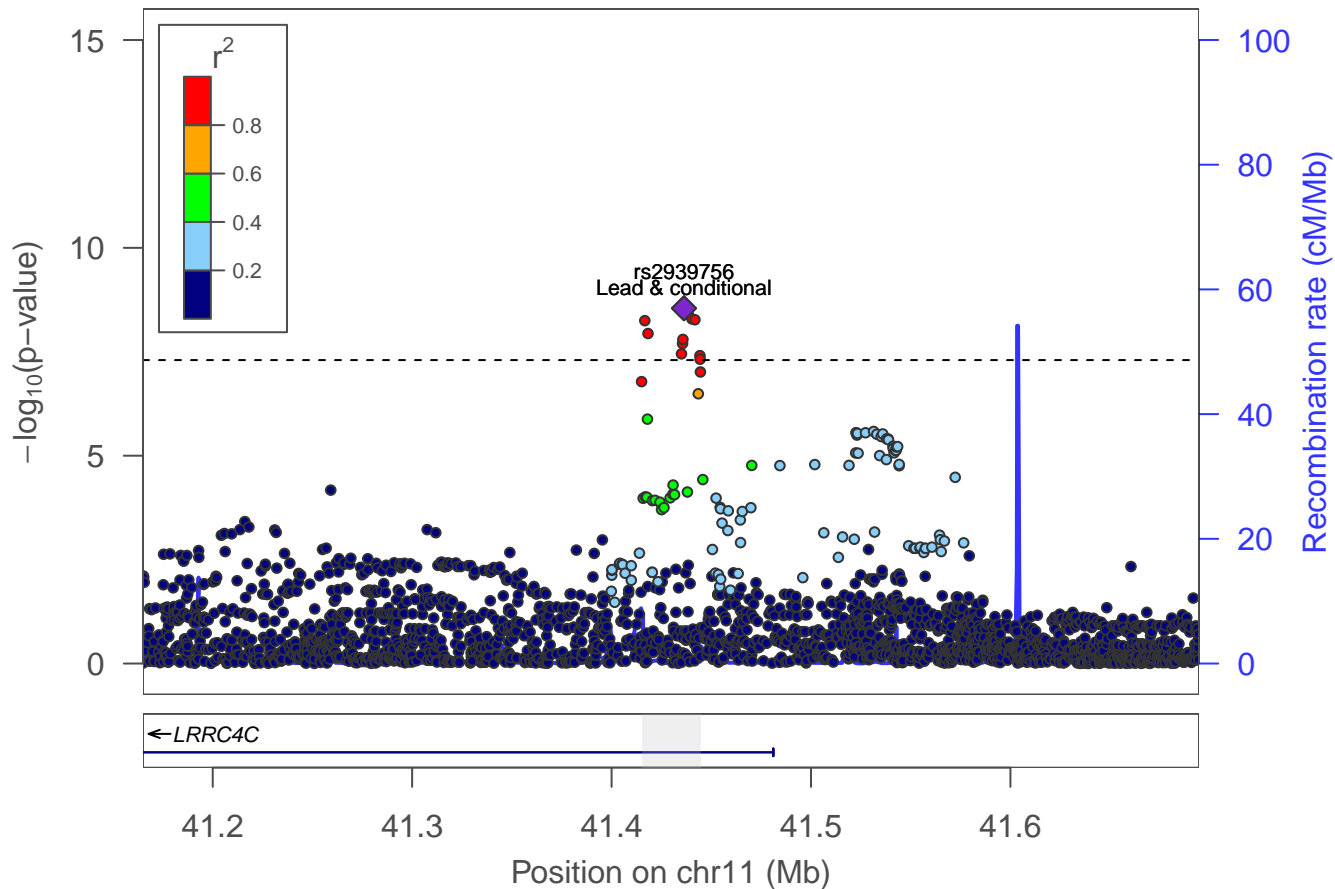

# Ever smoker: locus 131 [chr 11:59.071–59.234Mb]

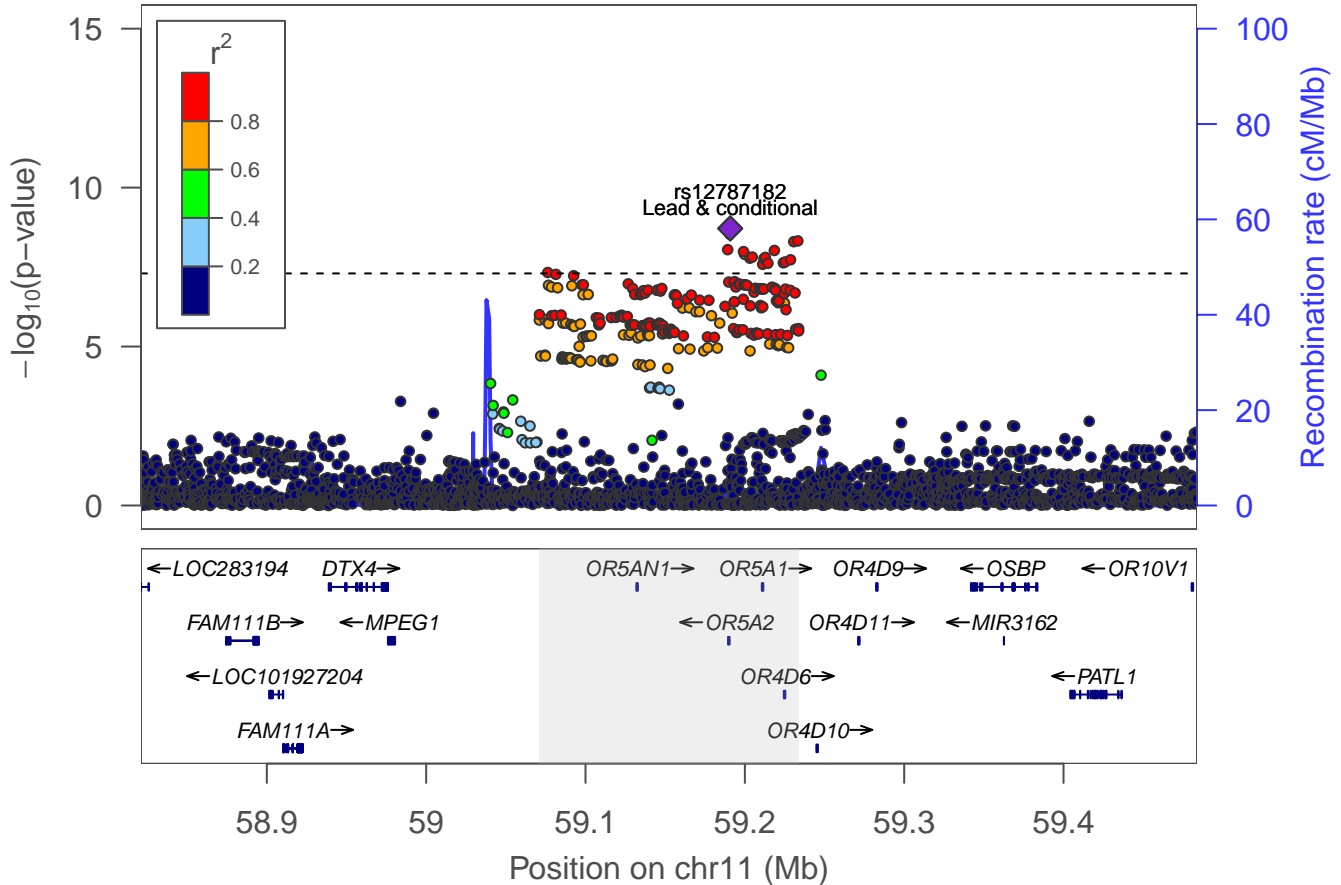



# Ever smoker: locus 132 [chr 11:73.306–73.312Mb]

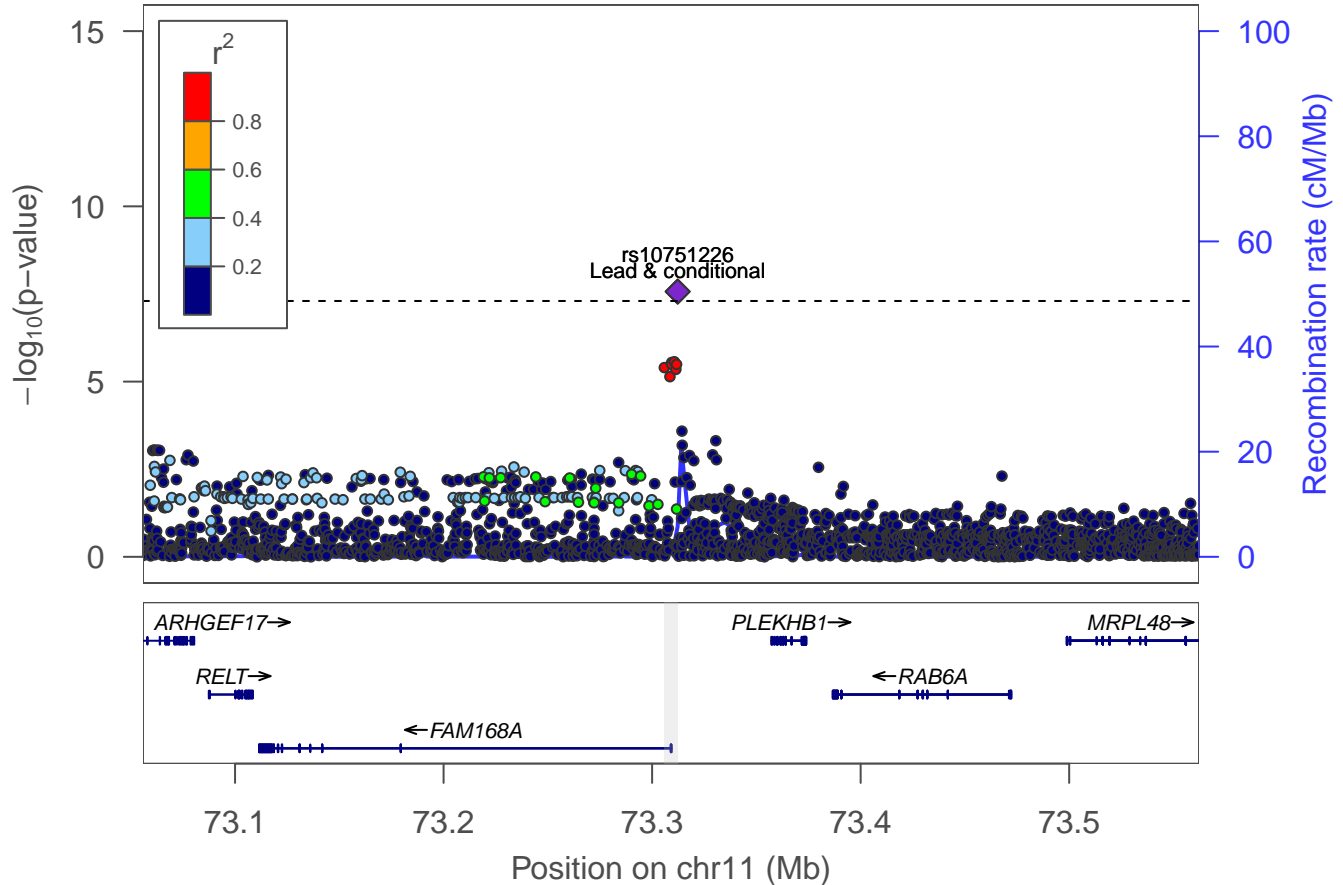

# Ever smoker: locus 133 [chr 11:85.927–86.065Mb]

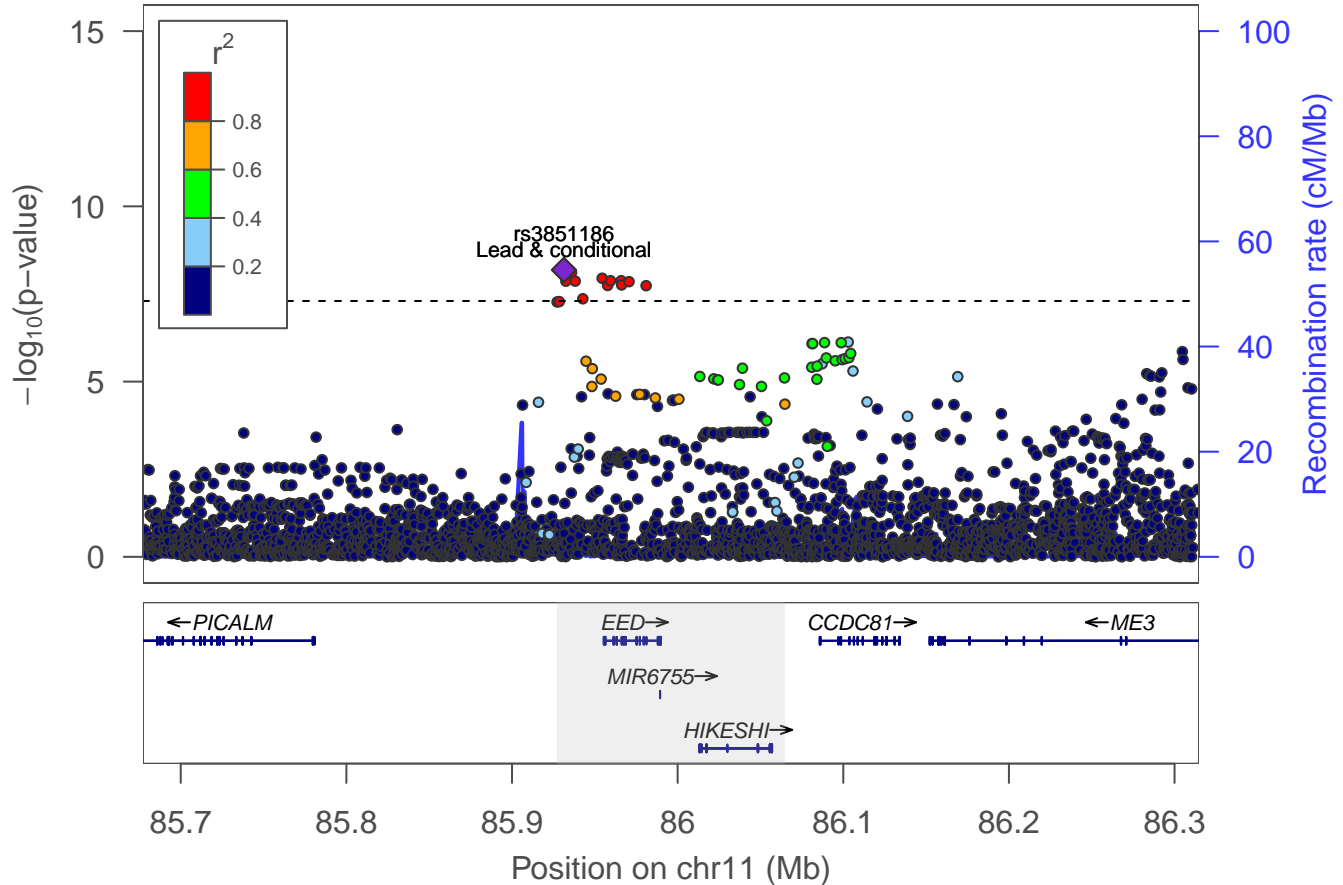

# Ever smoker: Locus 134 [chr 11: 112.710–112.992Mb]

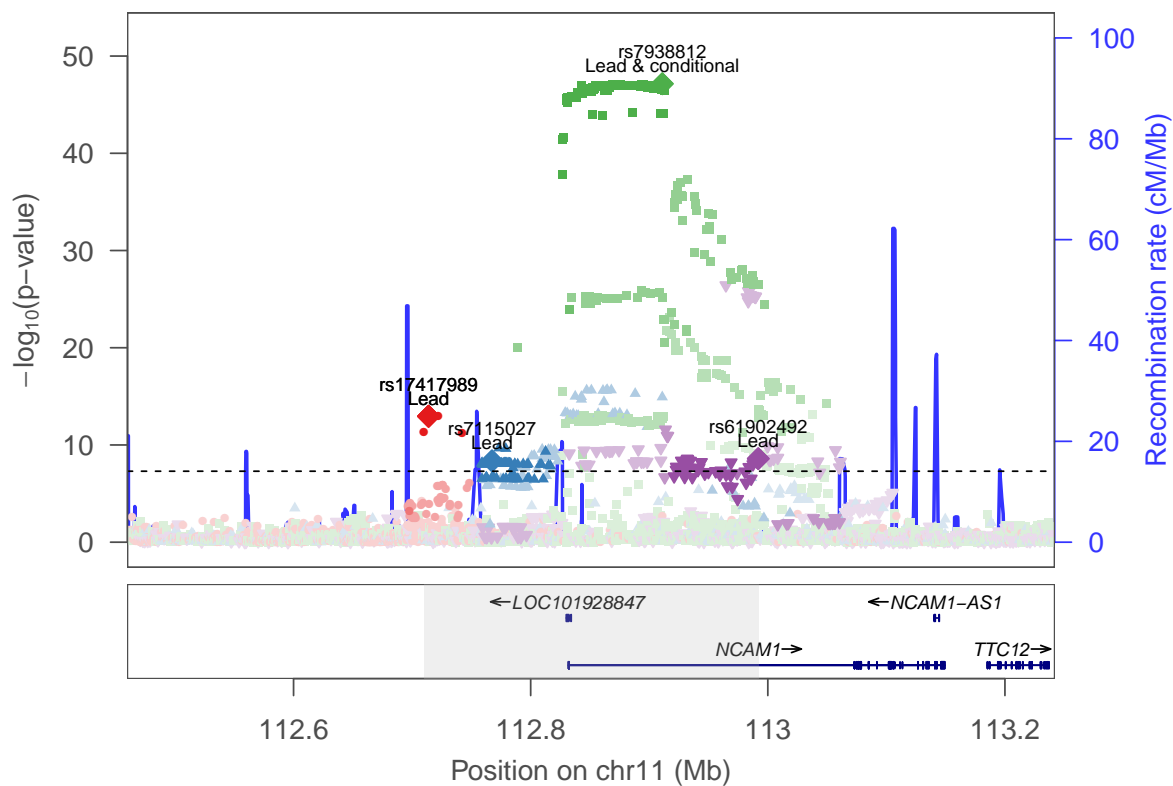

rs61902492    ▾  
 rs7938812    ■  
 rs7115027    ▲  
 rs17417989    ●

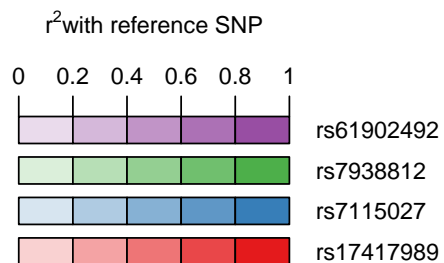

# Ever smoker: Locus 135 [chr 11: 121.523–121.662Mb]

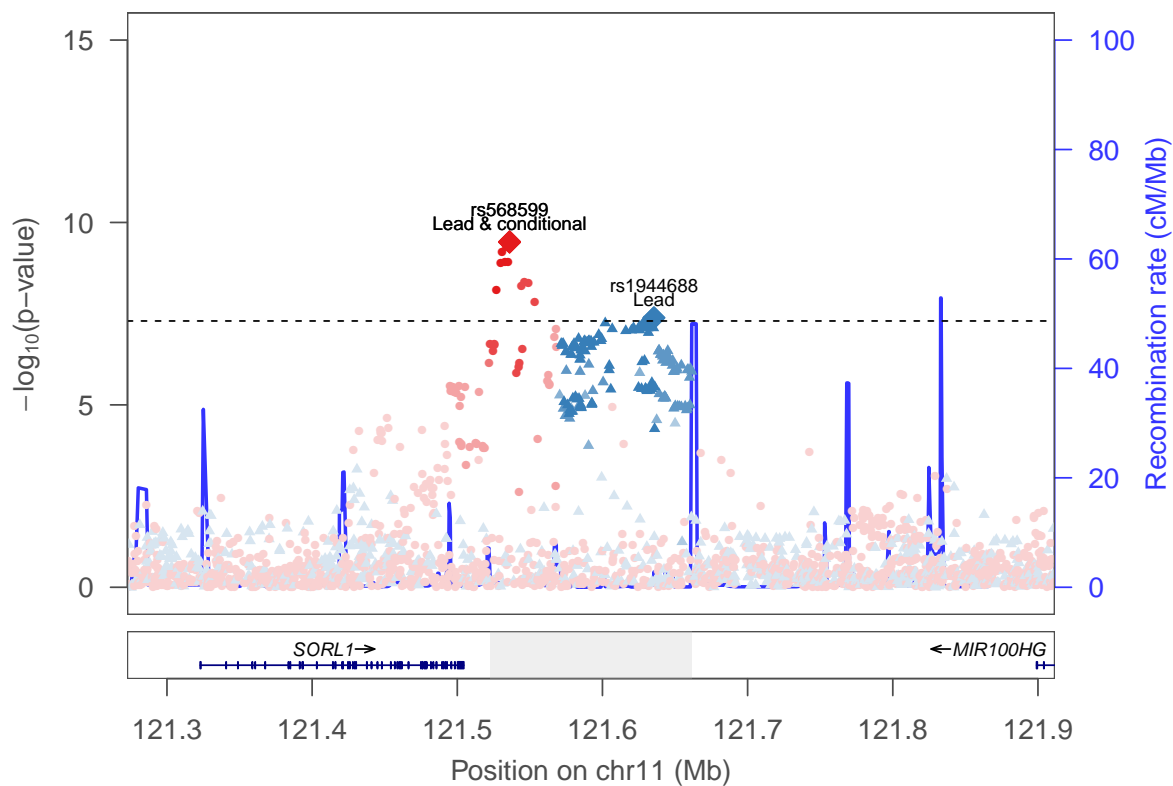

rs1944688 ▲  
rs568599 ●

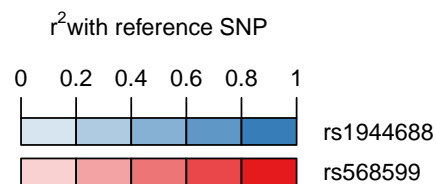

# Ever smoker: Locus 136 [chr 11: 132.055–132.386Mb]

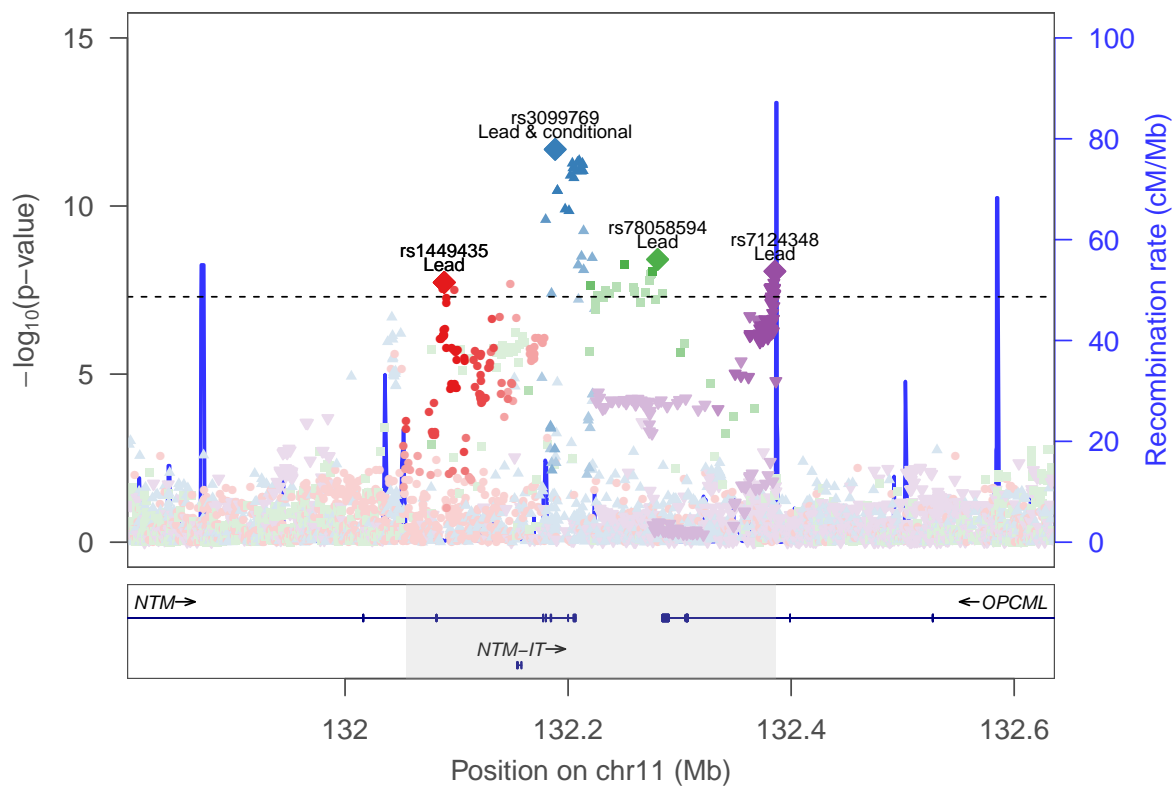

rs7124348 ▼  
 rs78058594 ■  
 rs3099769 ▲  
 rs1449435 ●

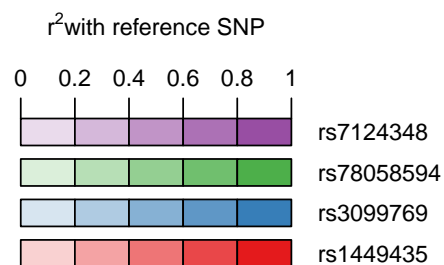

# Ever smoker: locus 137 [chr 12:56.370–56.482Mb]

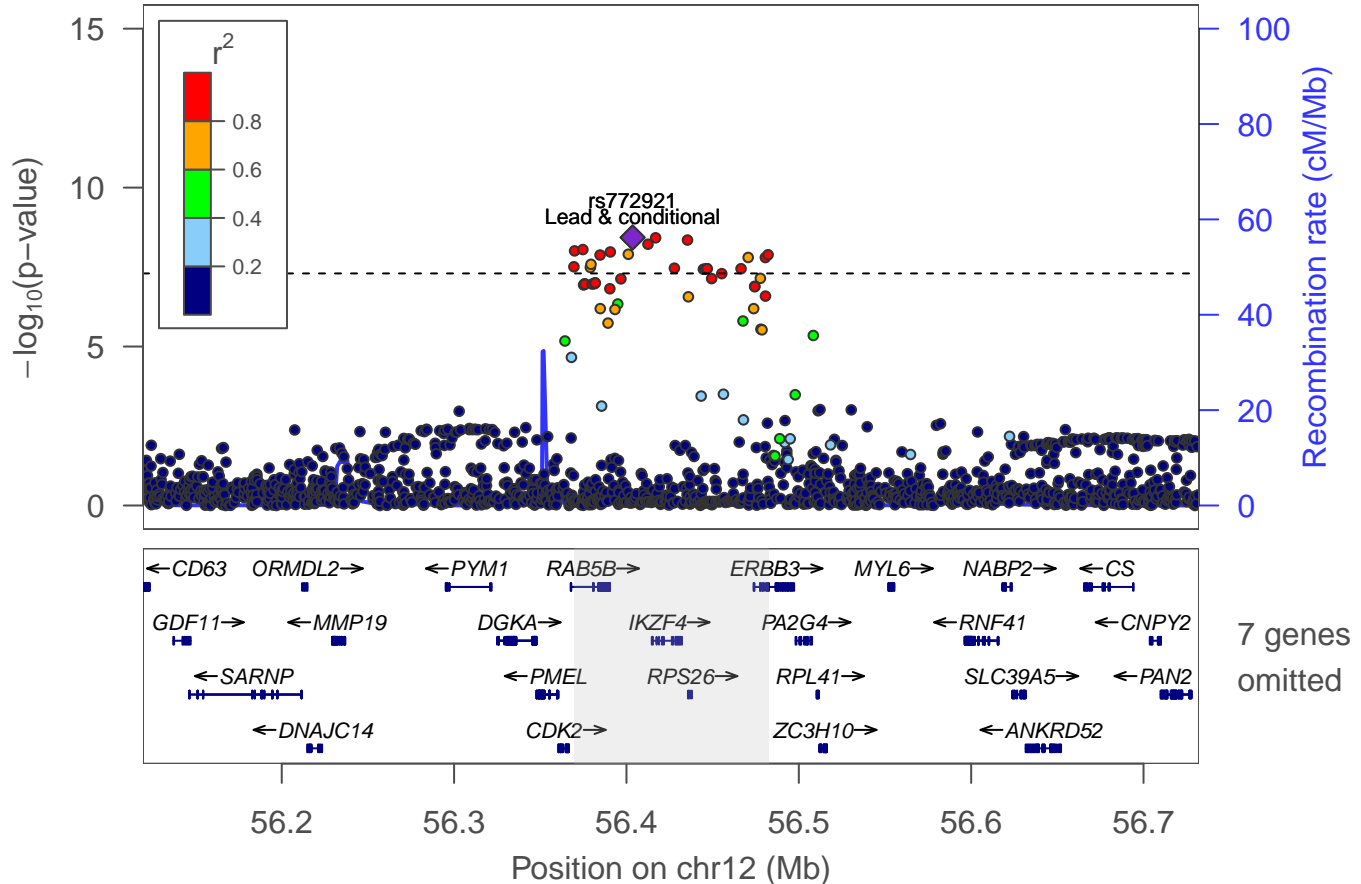

# Ever smoker: locus 138 [chr 12:69.638–69.744Mb]

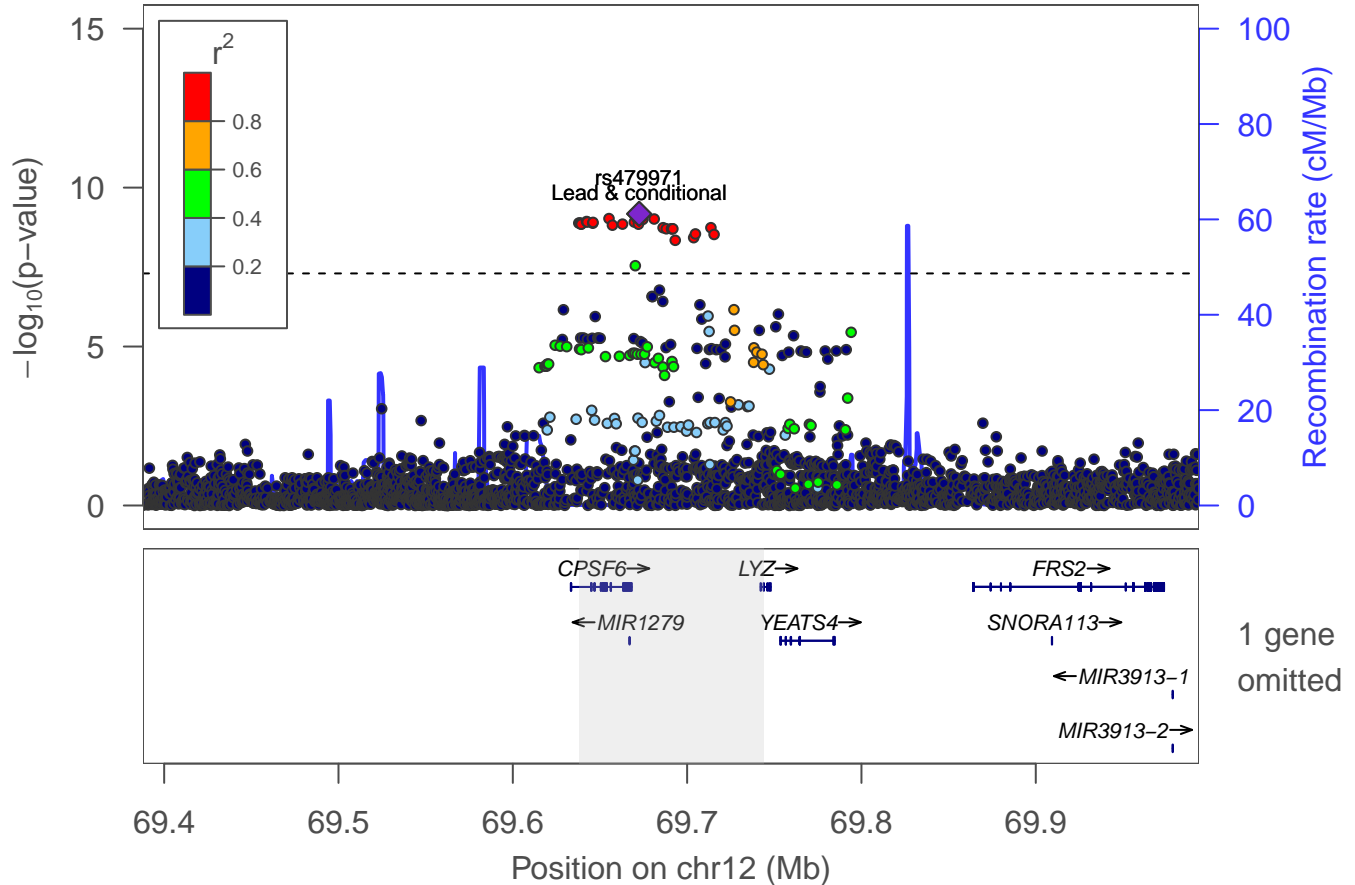

# Ever smoker: locus 139 [chr 12:86.198–86.571Mb]

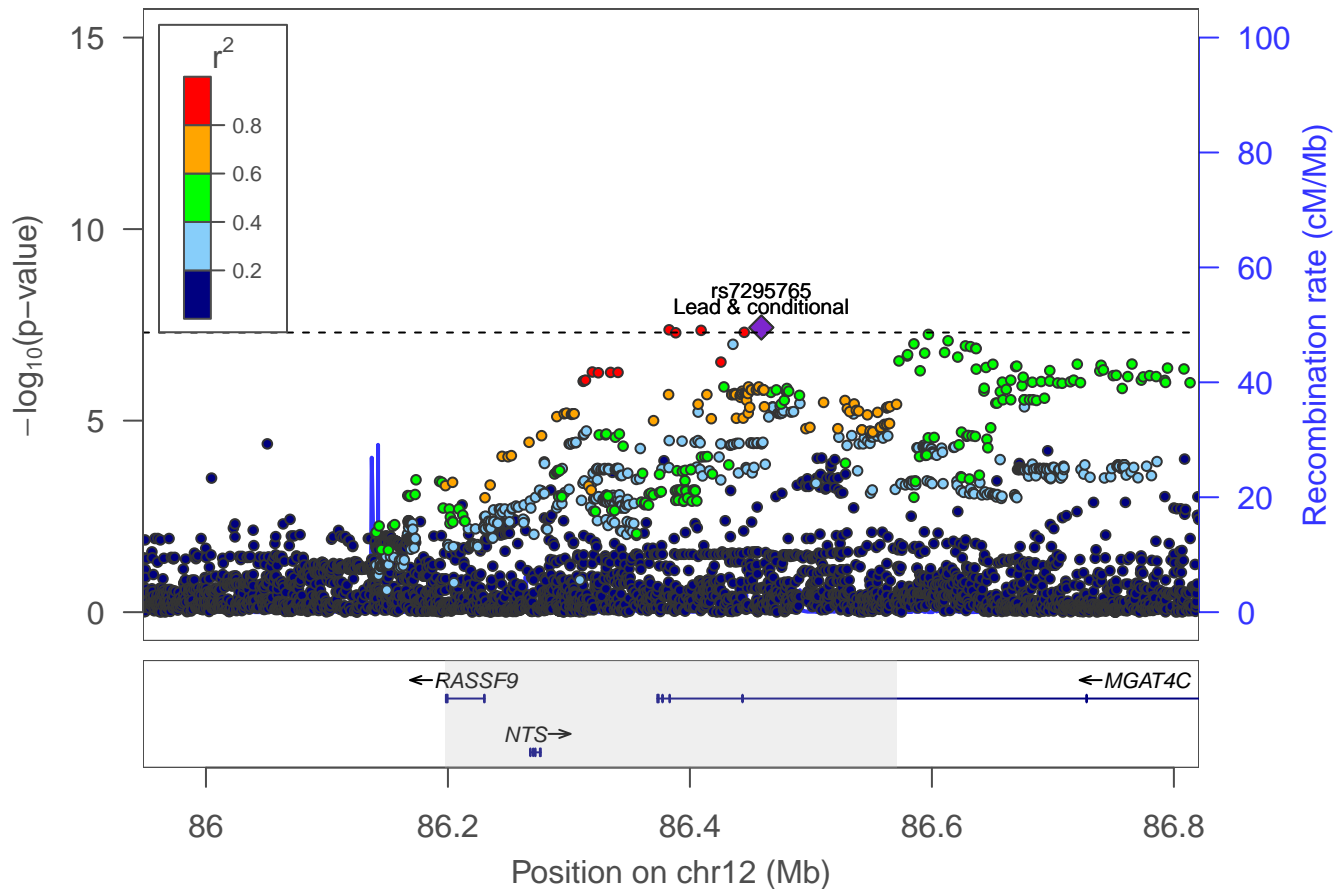



# Ever smoker: locus 140 [chr 12:111.834–112.906Mb]

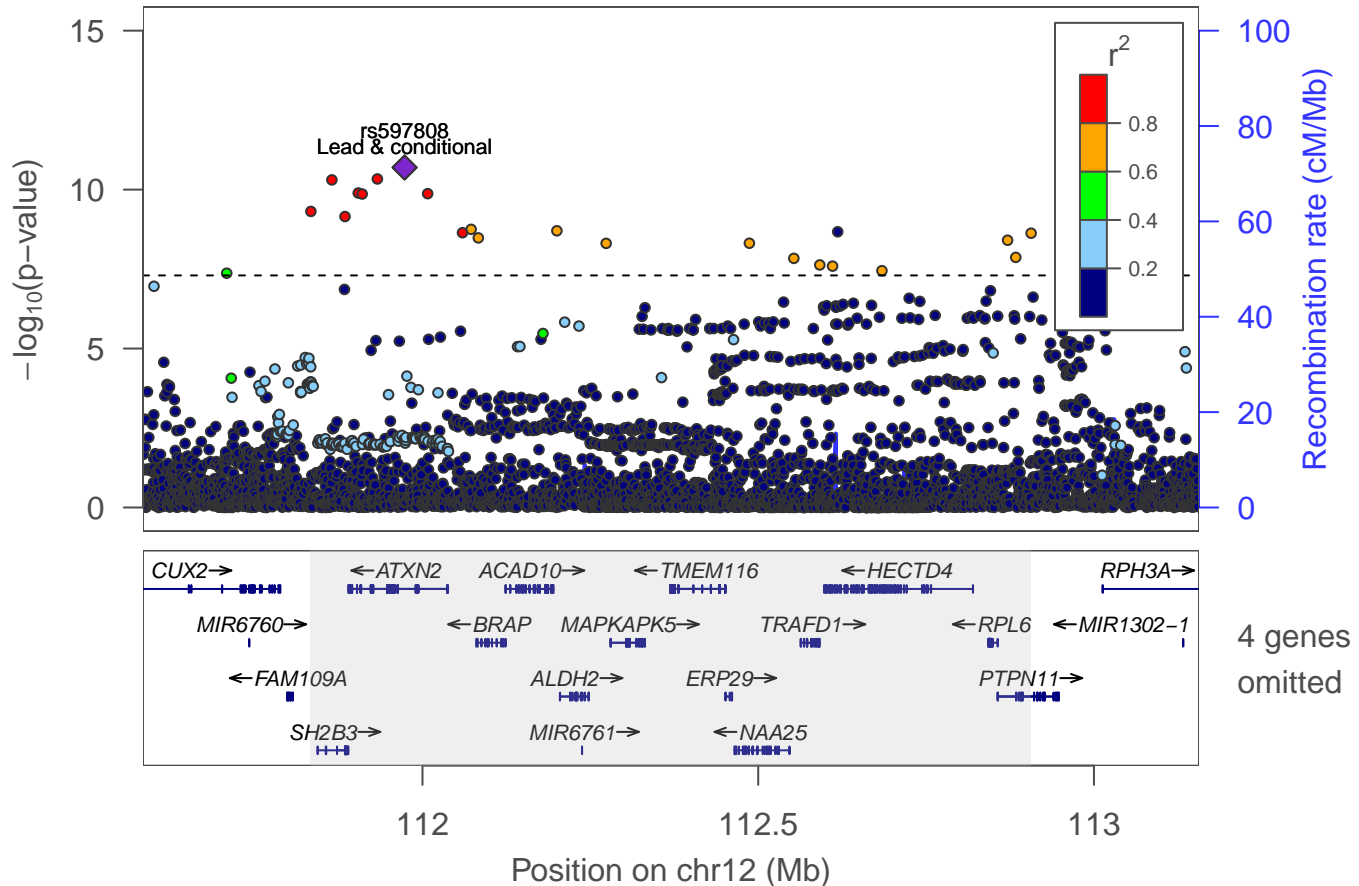

# Ever smoker: locus 141 [chr 12:114.103–114.131Mb]

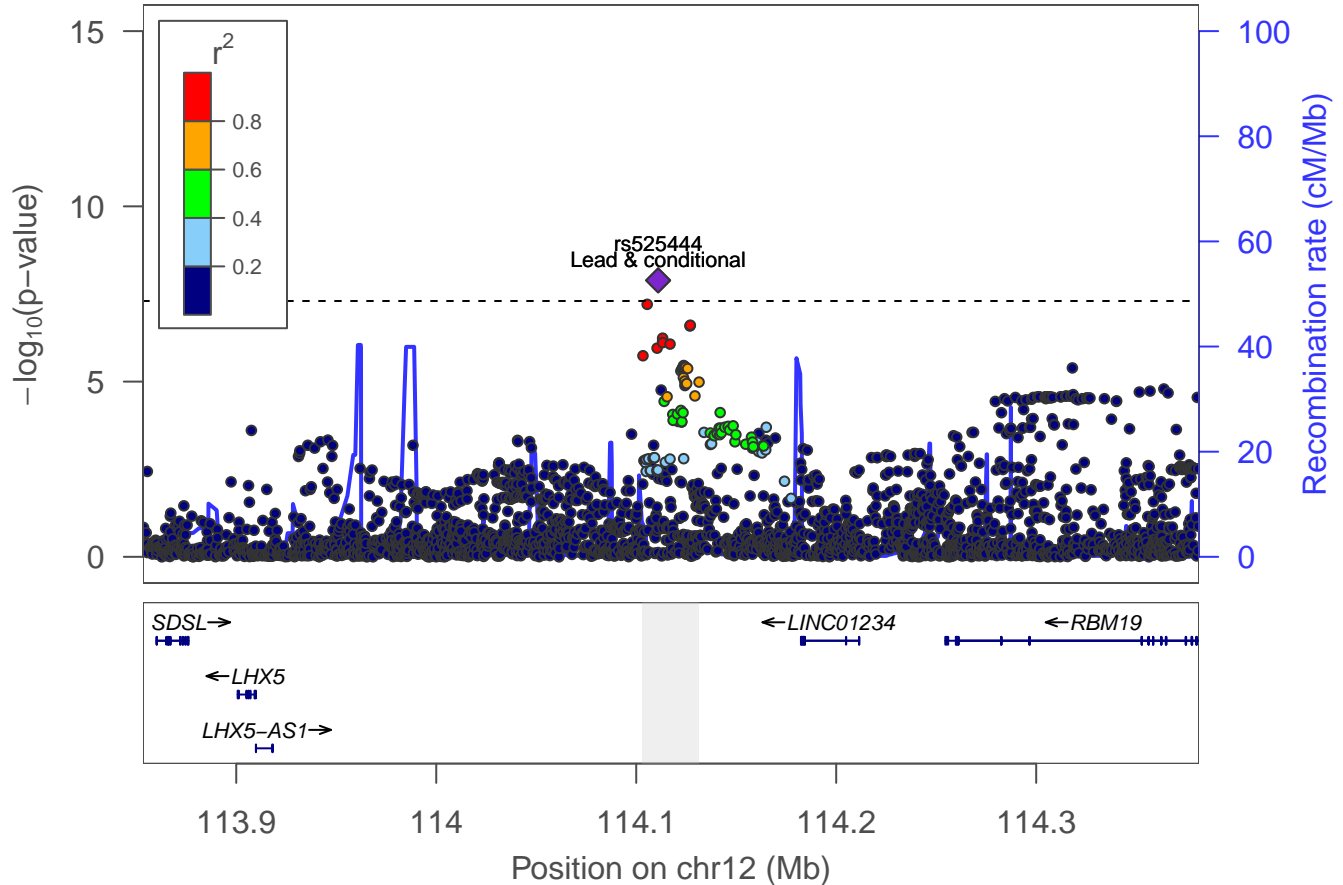

# Ever smoker: locus 142 [chr 12:114.456–114.607Mb]

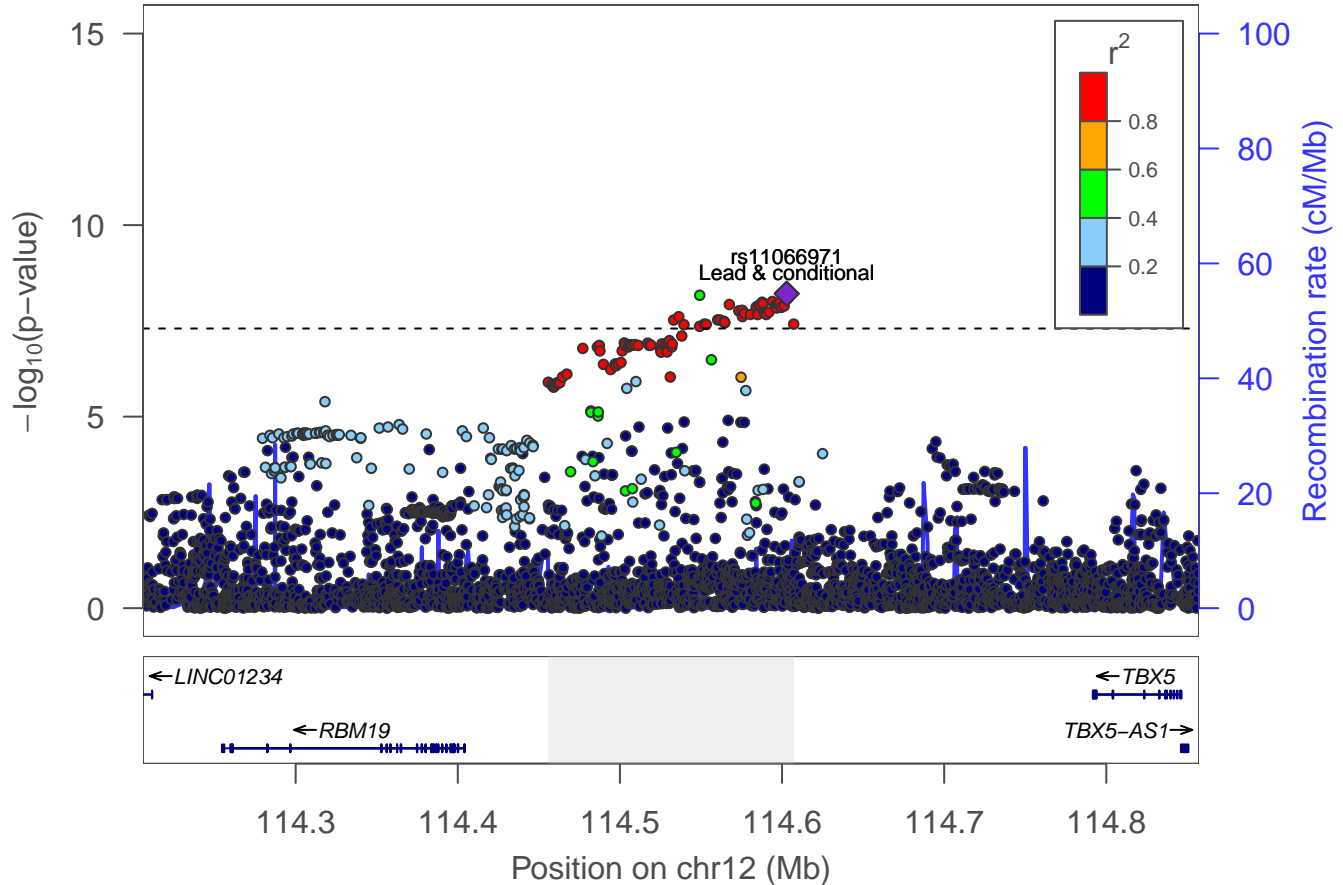

# Ever smoker: Locus 143 [chr 12: 121.068–121.379Mb]

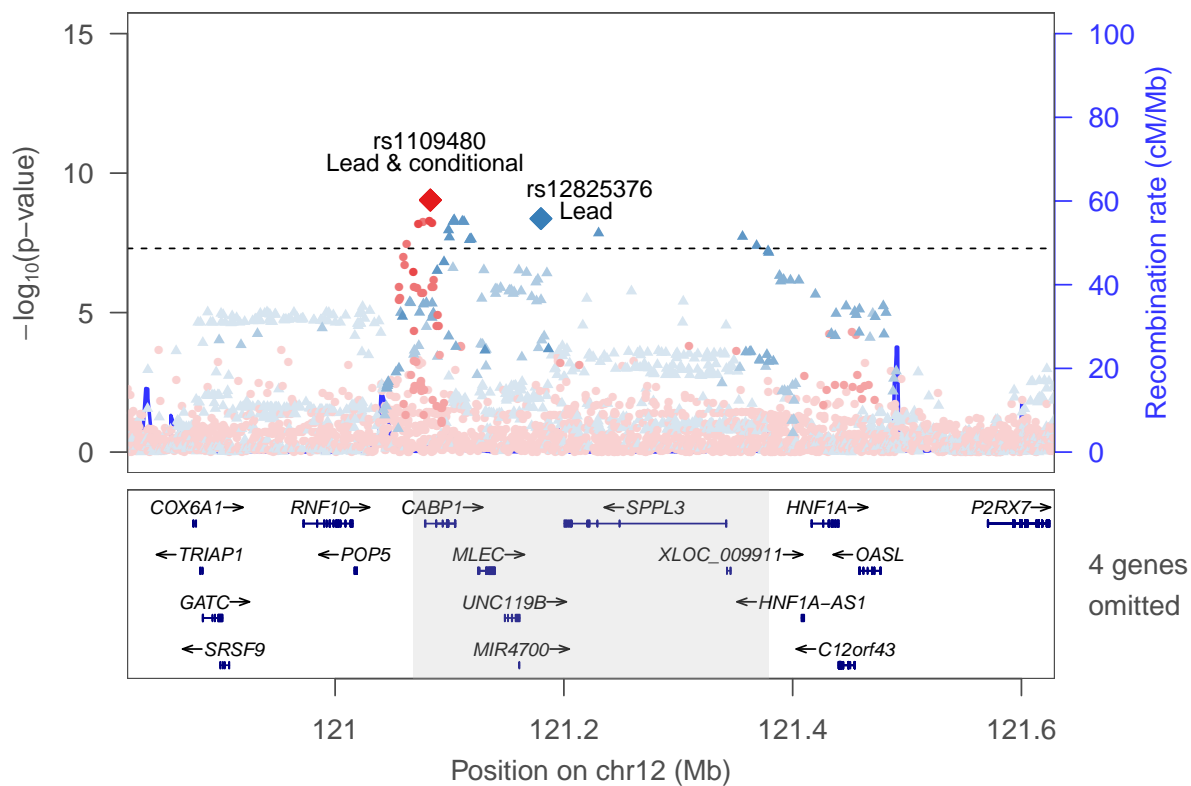

rs12825376 ▲  
 rs1109480 ●

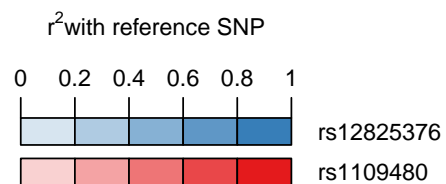

# Ever smoker: locus 144 [chr 12:125.799–125.815Mb]

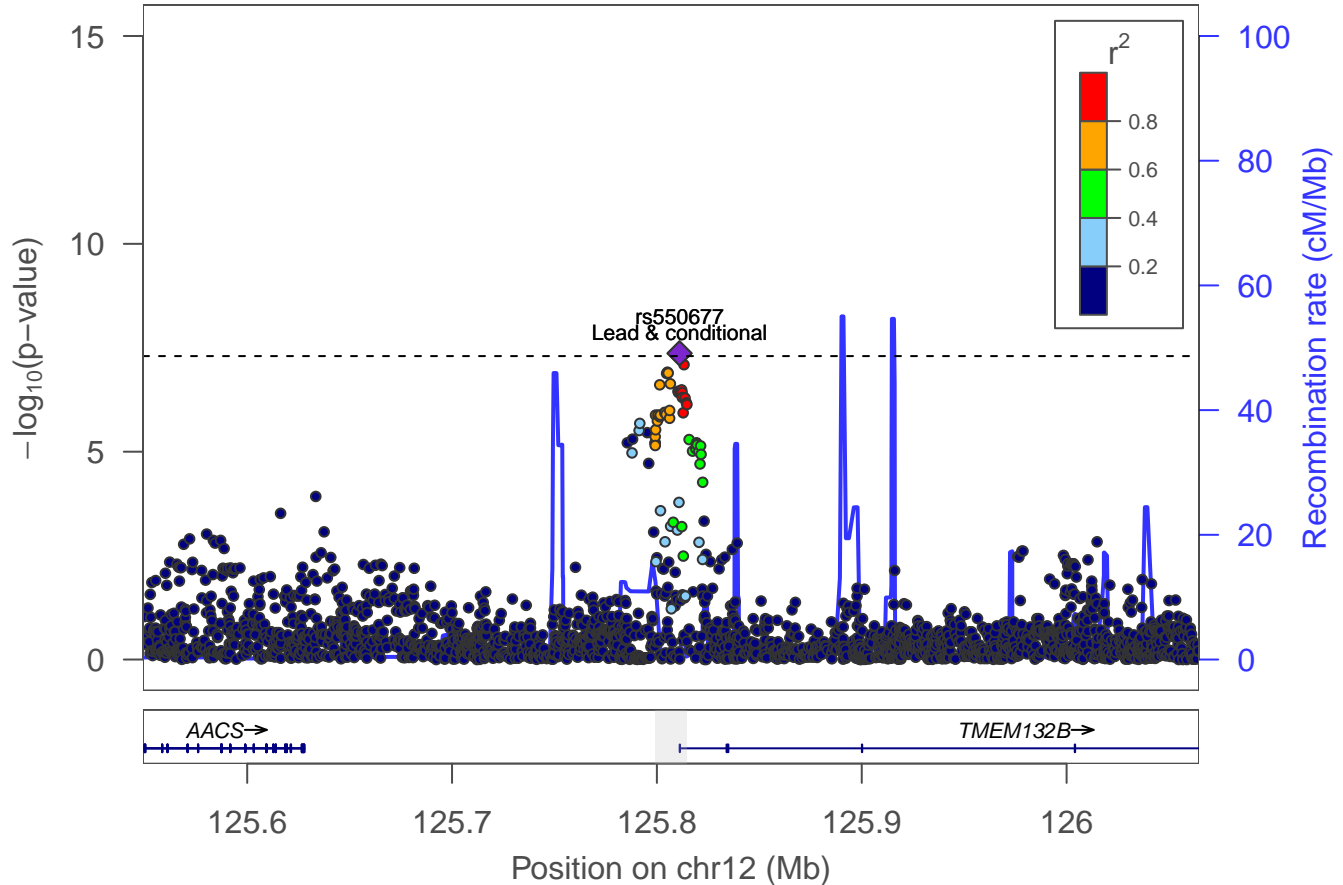

# Ever smoker: locus 145 [chr 12:133.362–133.487Mb]

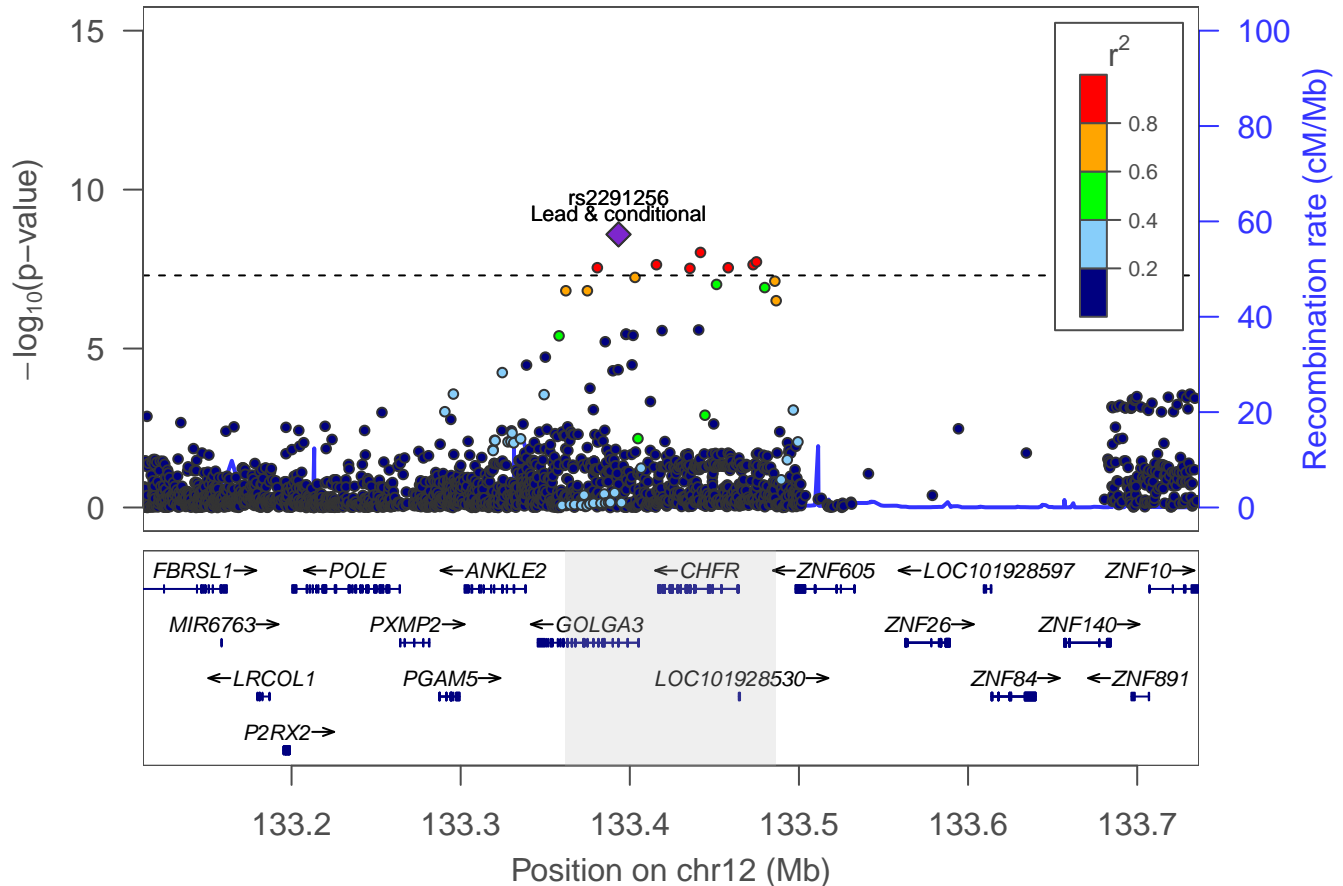

# Ever smoker: locus 146 [chr 13:59.380–59.484Mb]

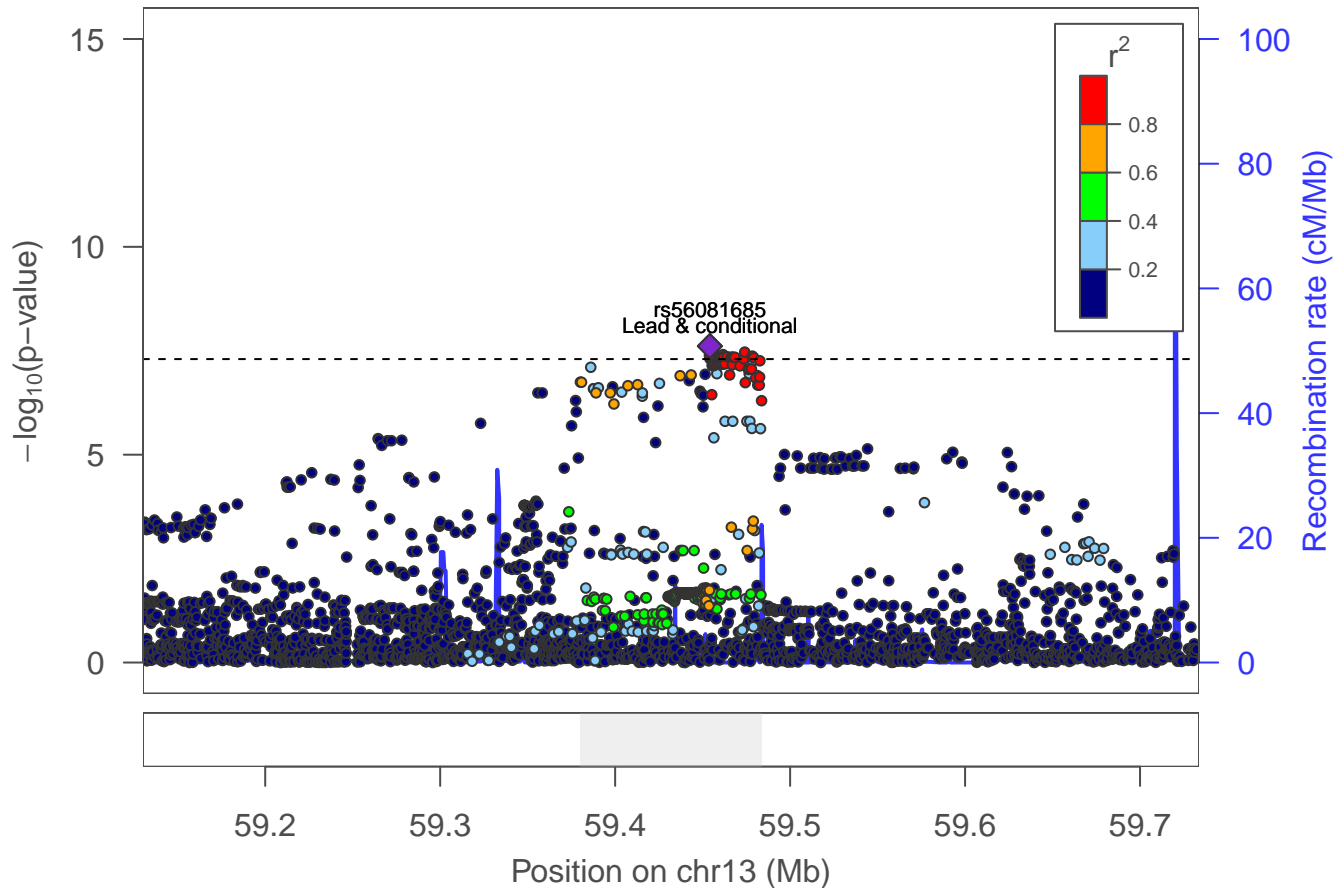

# Ever smoker: locus 147 [chr 13:66.916–66.975Mb]

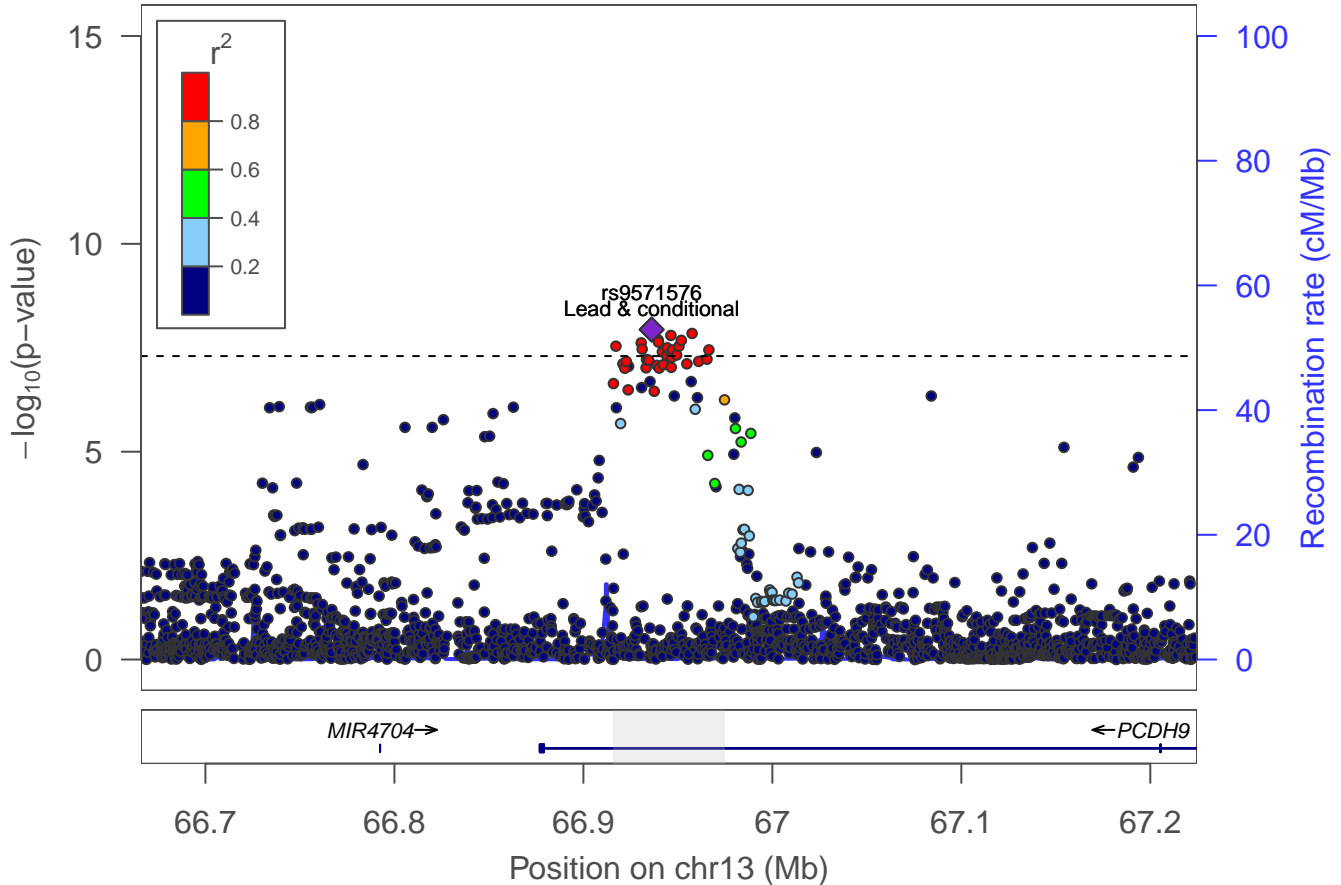



# Ever smoker: locus 148 [chr 13:80.169–80.193Mb]

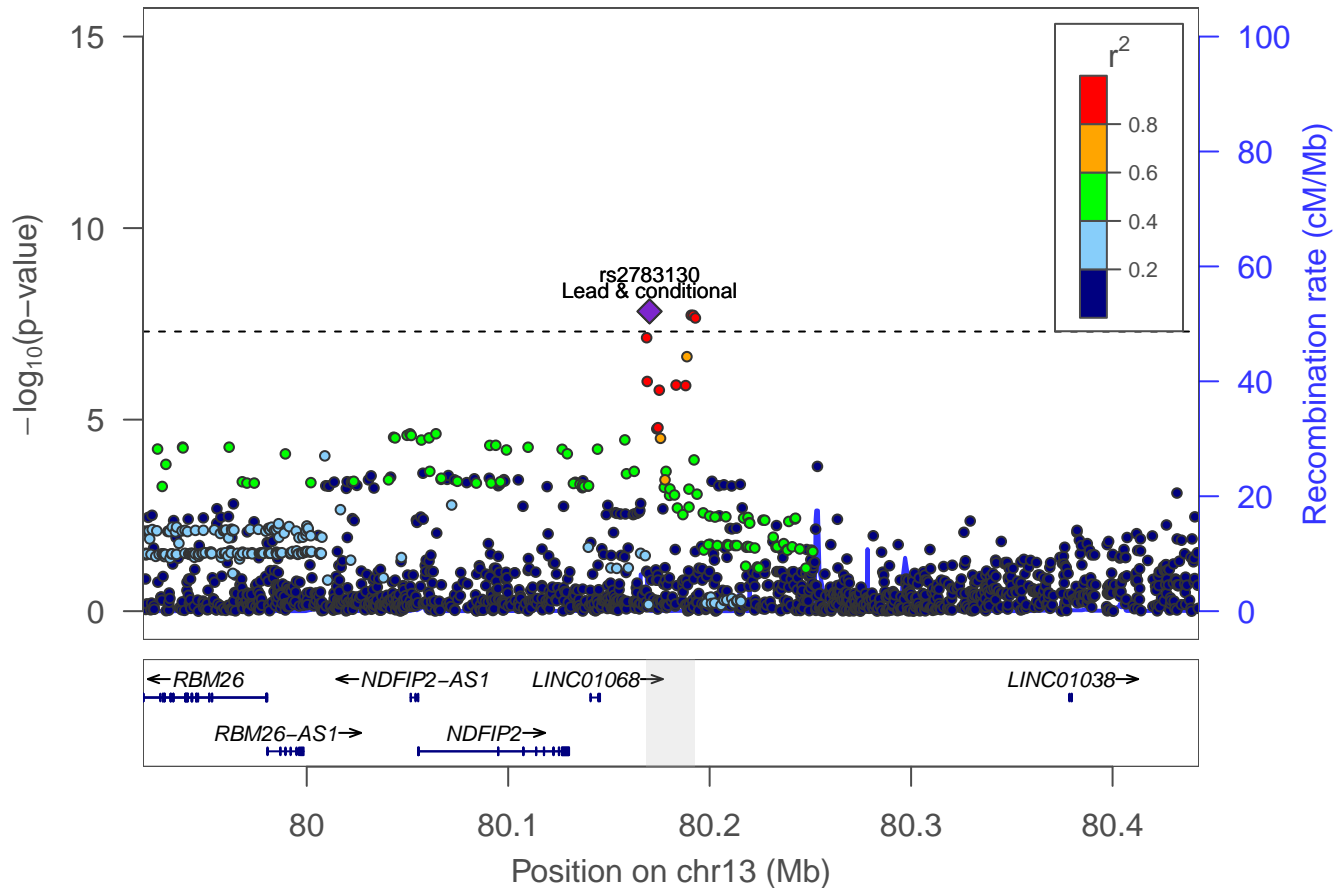

# Ever smoker: locus 149 [chr 13:97.064–97.127Mb]

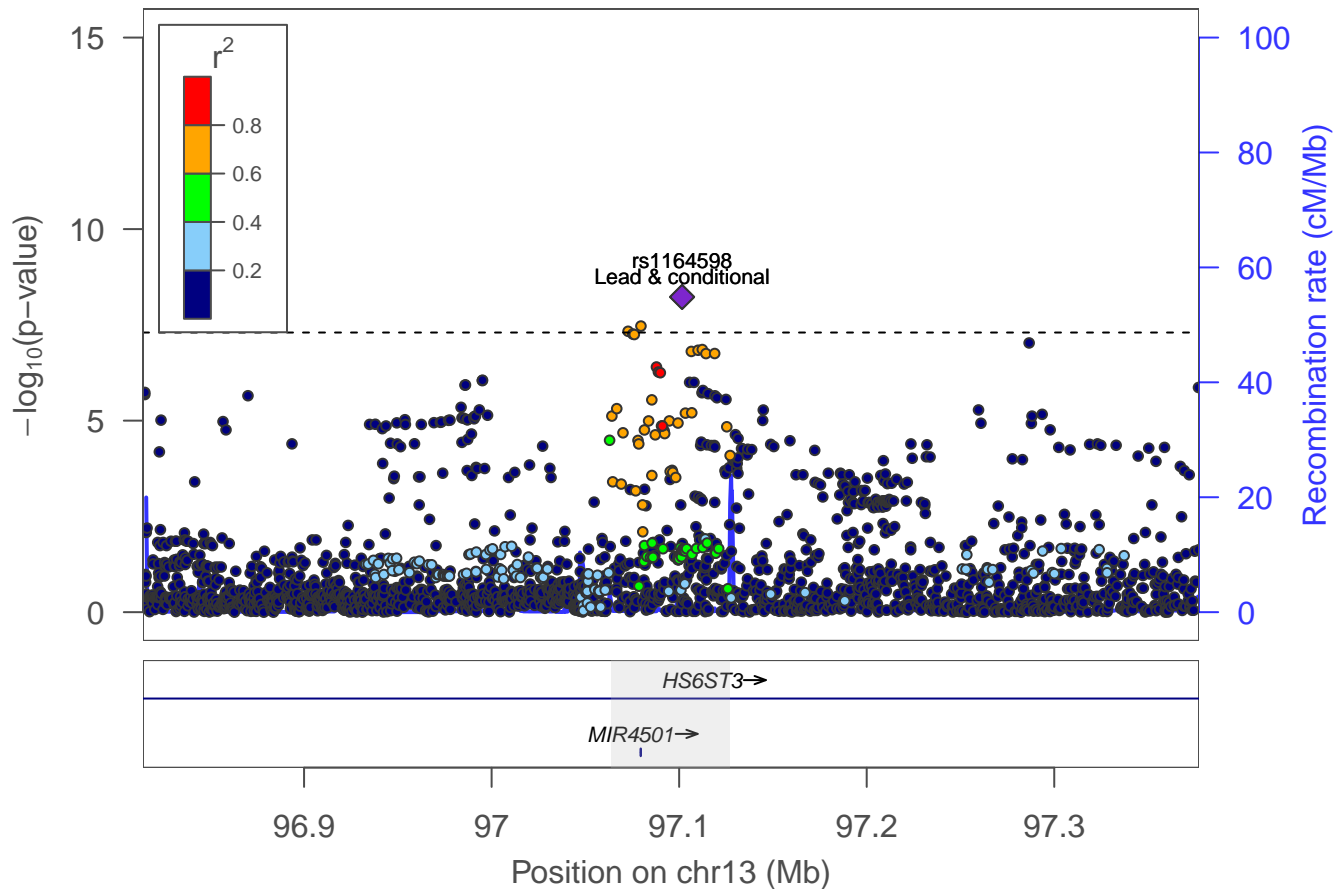

# Ever smoker: locus 150 [chr 13:100.546–100.550Mb]

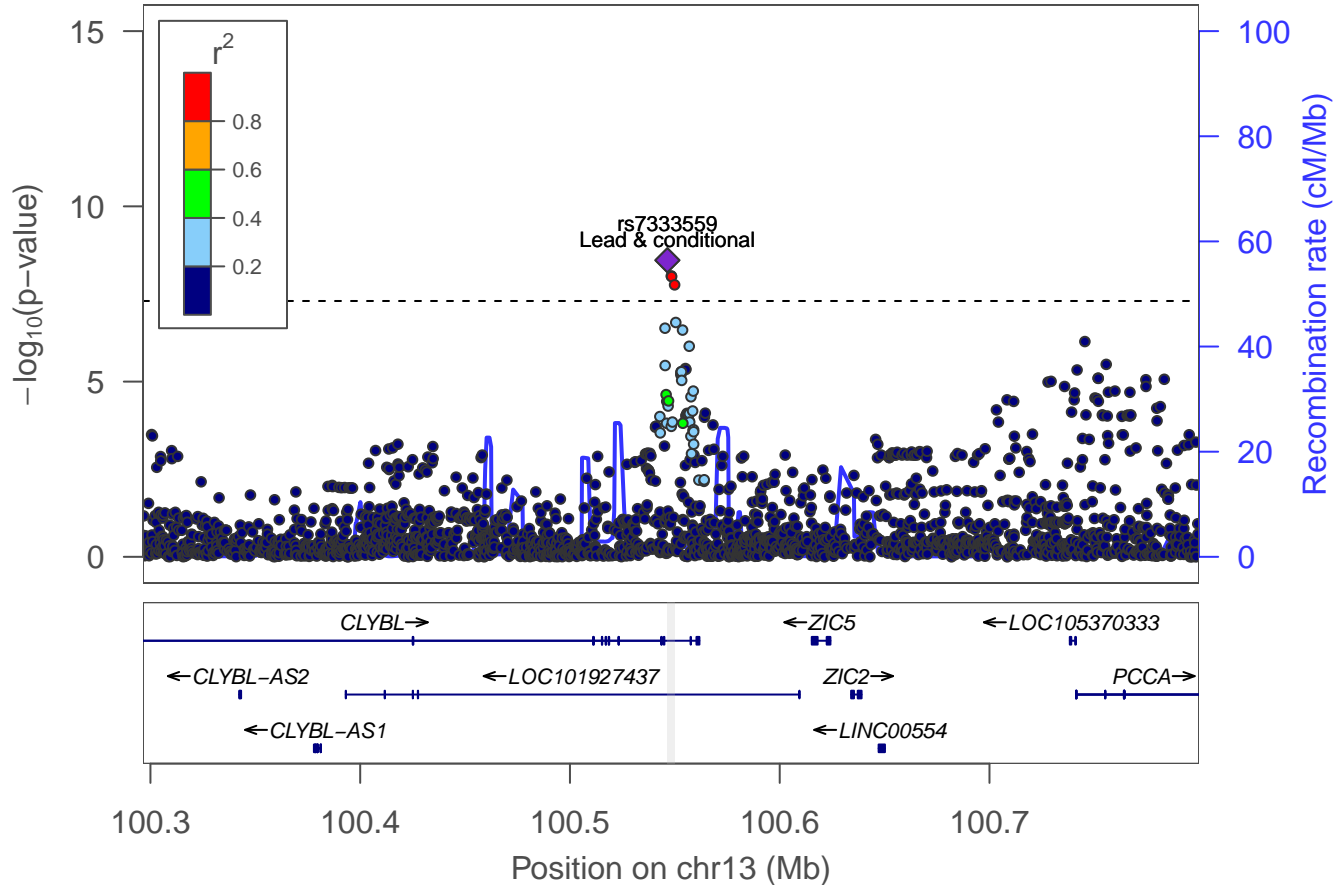

# Ever smoker: locus 151 [chr 13:101.103–101.159Mb]

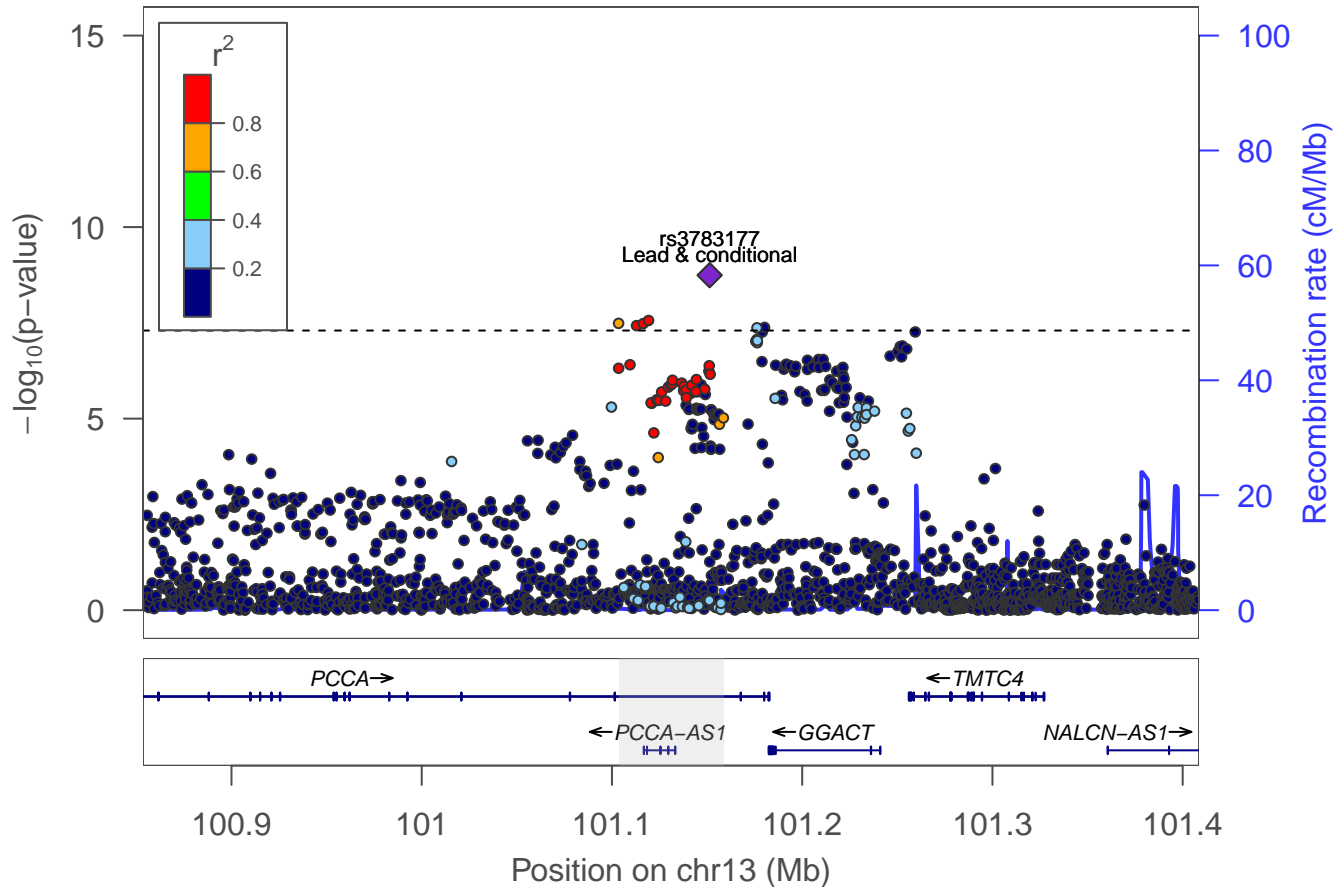

# Ever smoker: locus 152 [chr 14:29.469–29.490Mb]

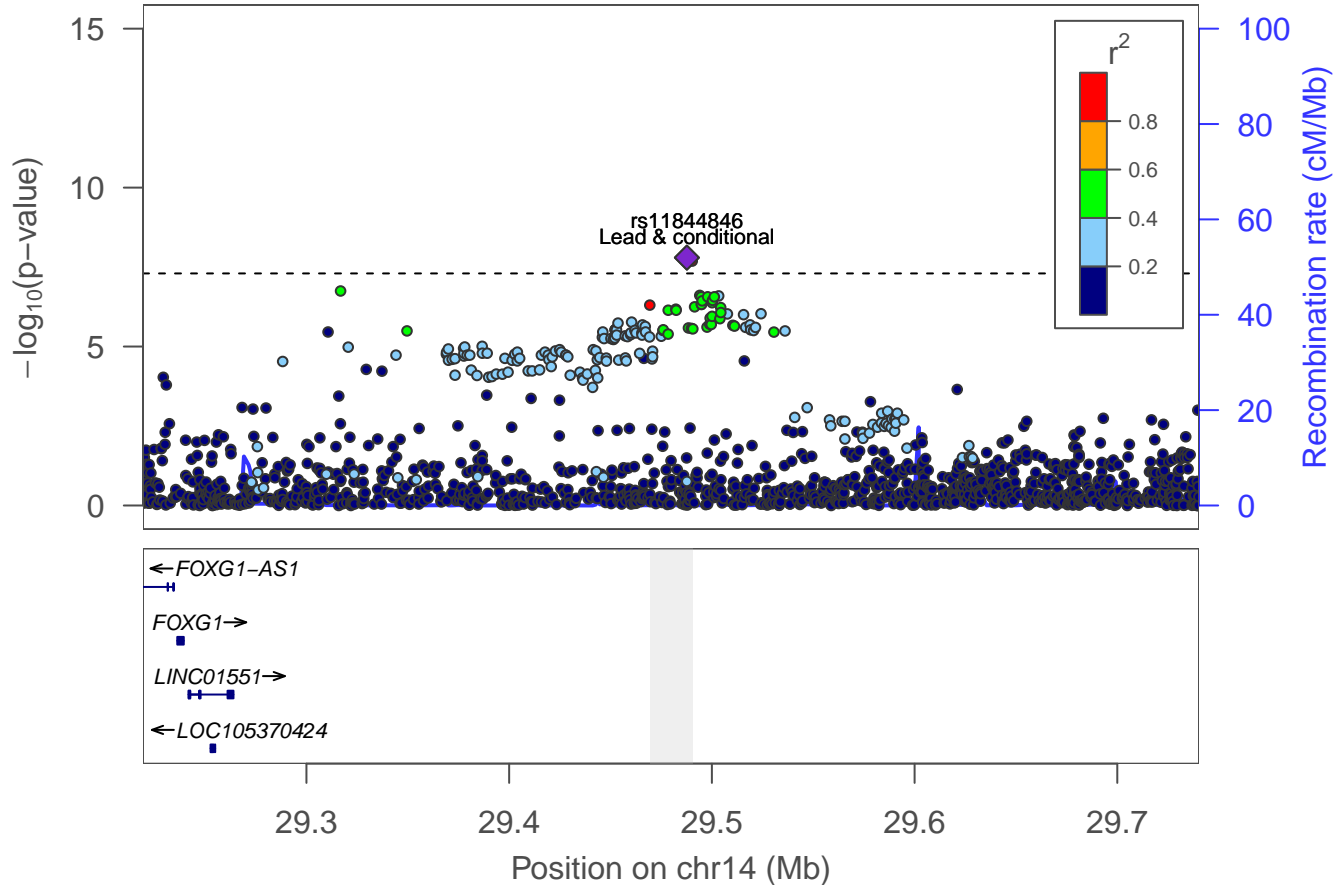

# Ever smoker: locus 153 [chr 14:77.615–77.621Mb]

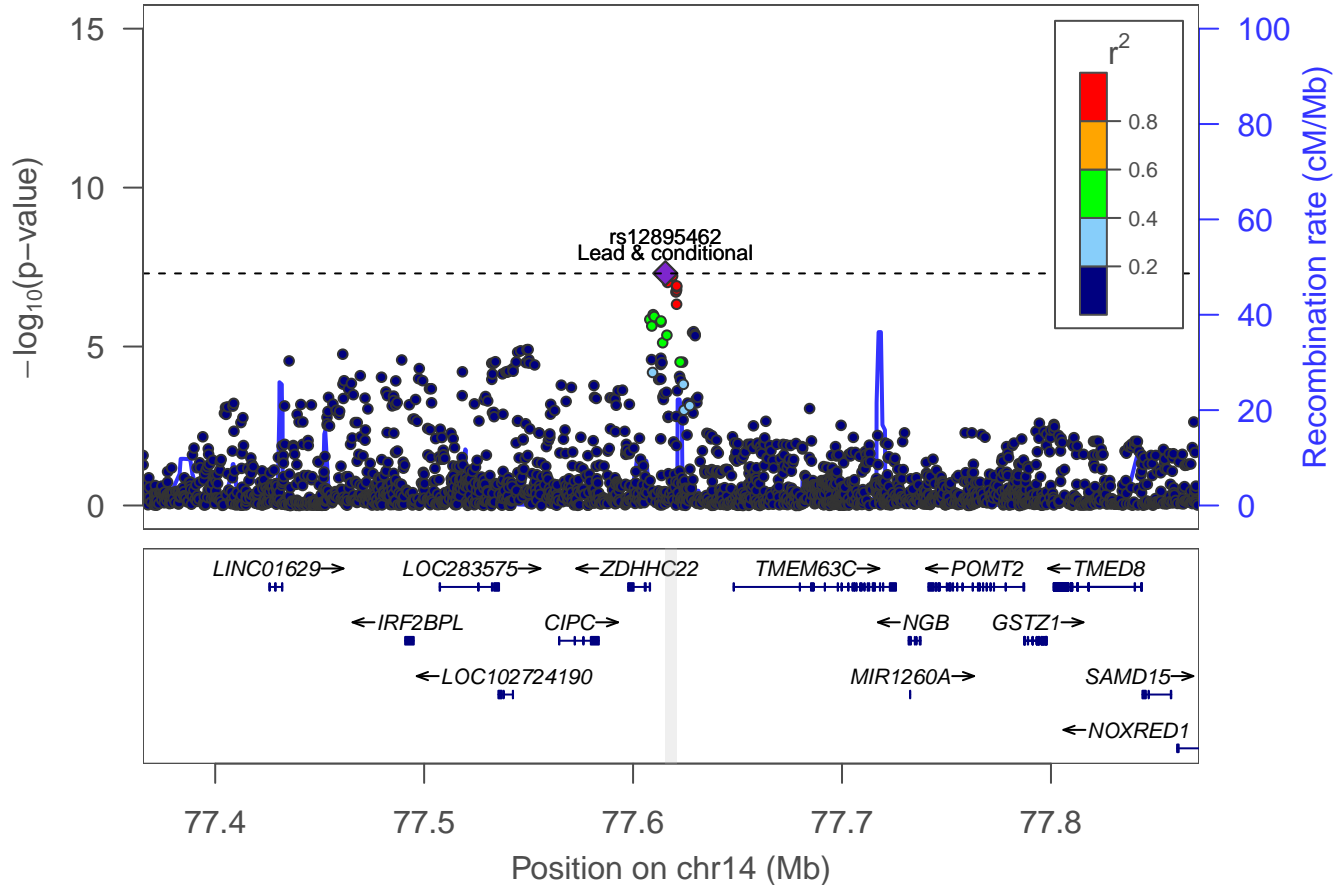

# Ever smoker: locus 154 [chr 14:98.647–98.670Mb]

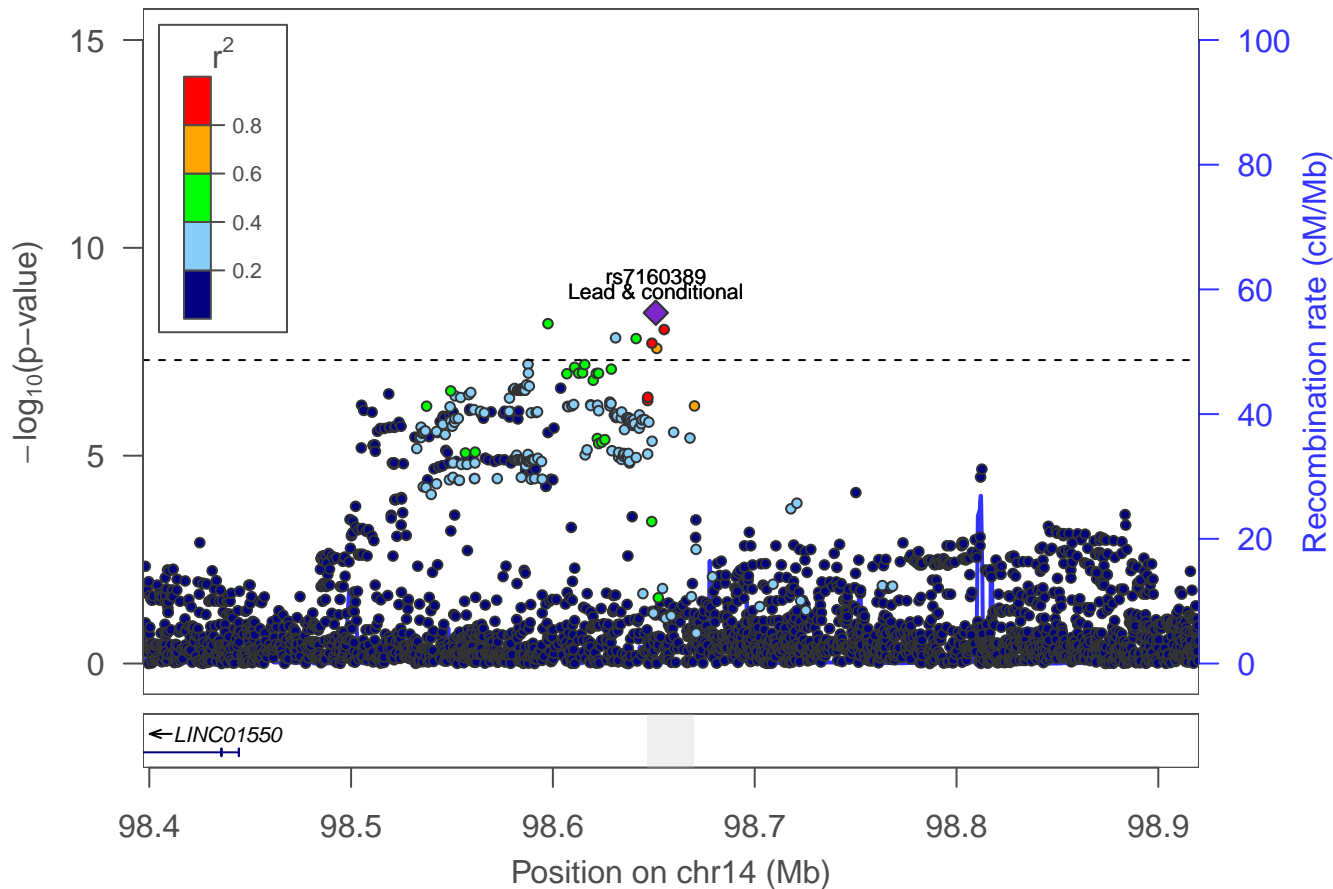

# Ever smoker: Locus 155 [chr 15: 47.613–47.977Mb]

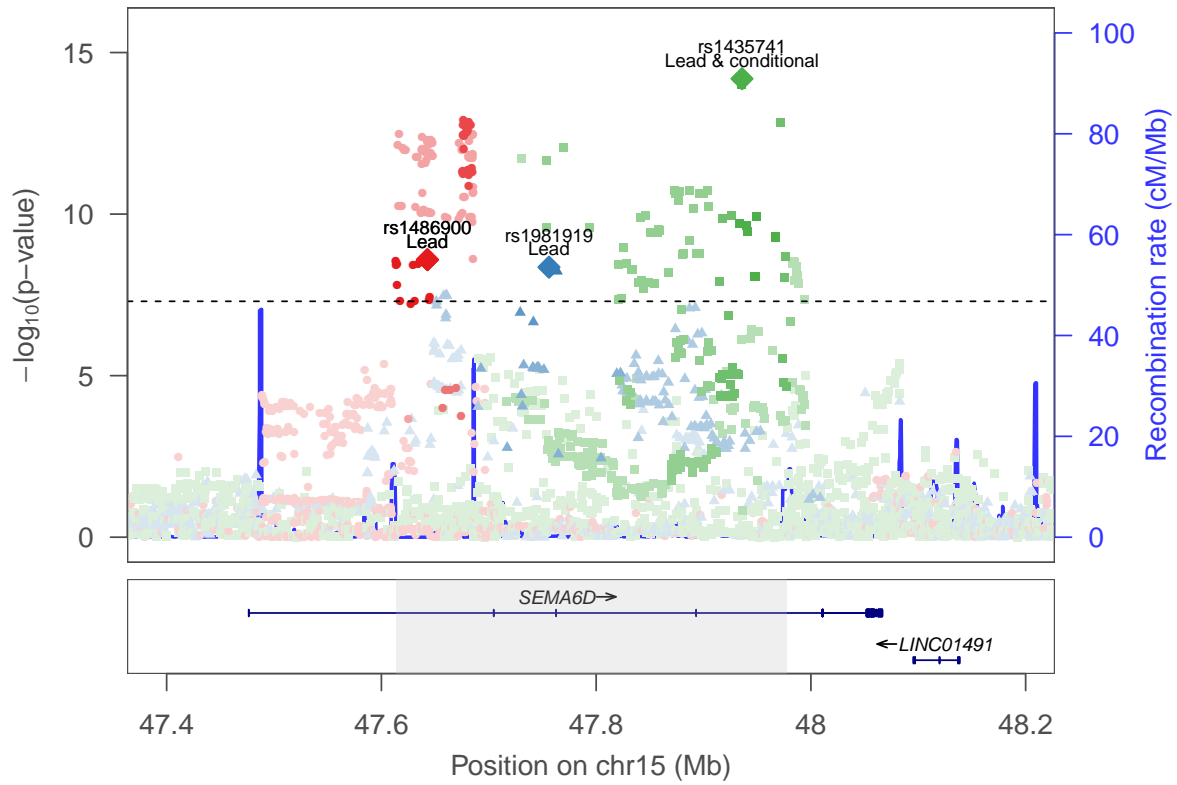

rs1435741 ■  
rs1981919 ▲  
rs1486900 ●

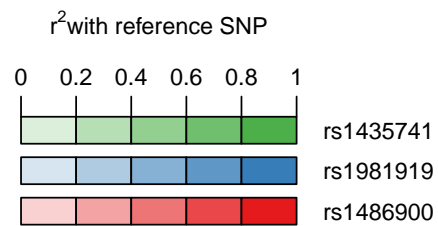



# Ever smoker: locus 156 [chr 15:67.717–67.992Mb]

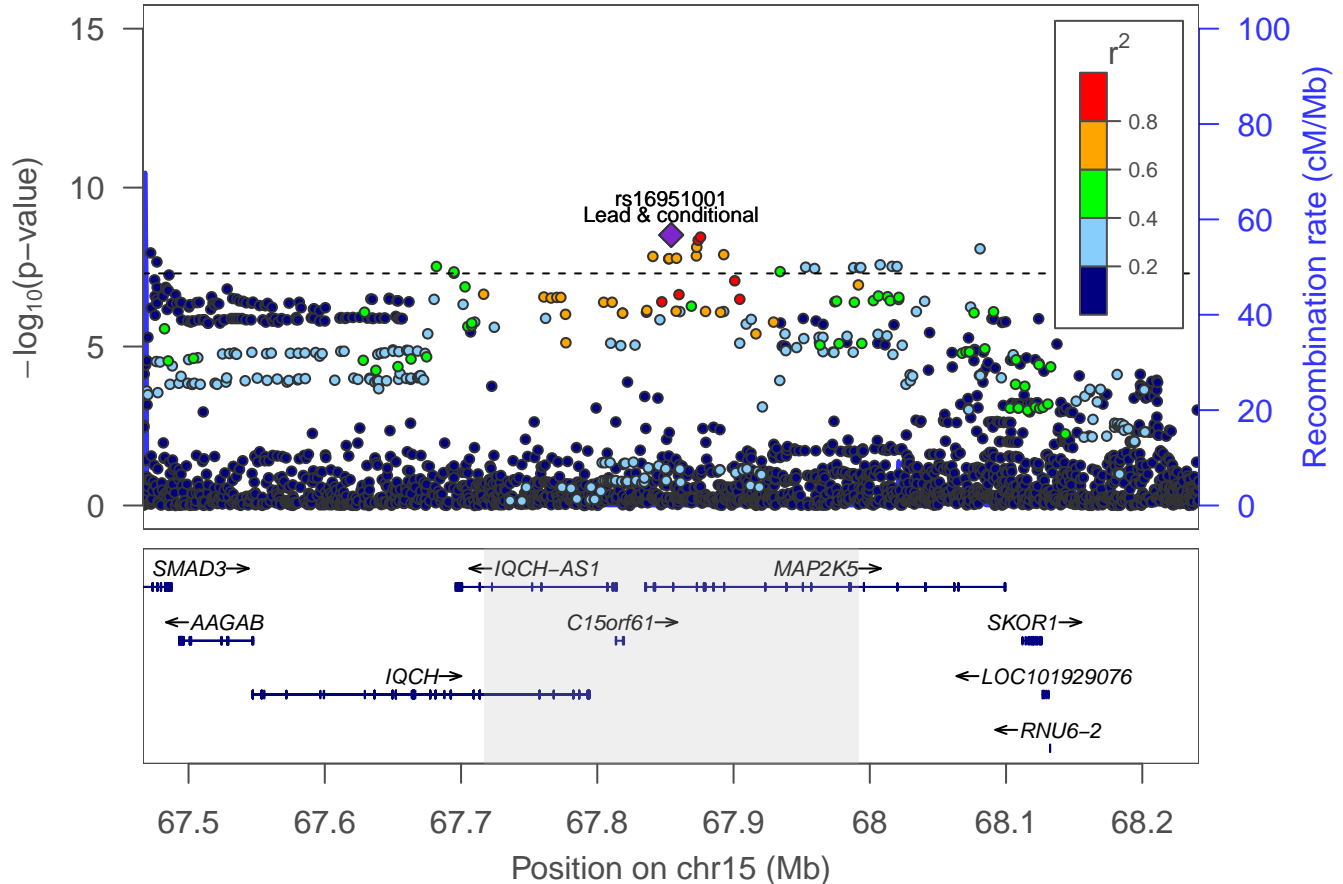

# Ever smoker: locus 157 [chr 15:89.900–89.942Mb]

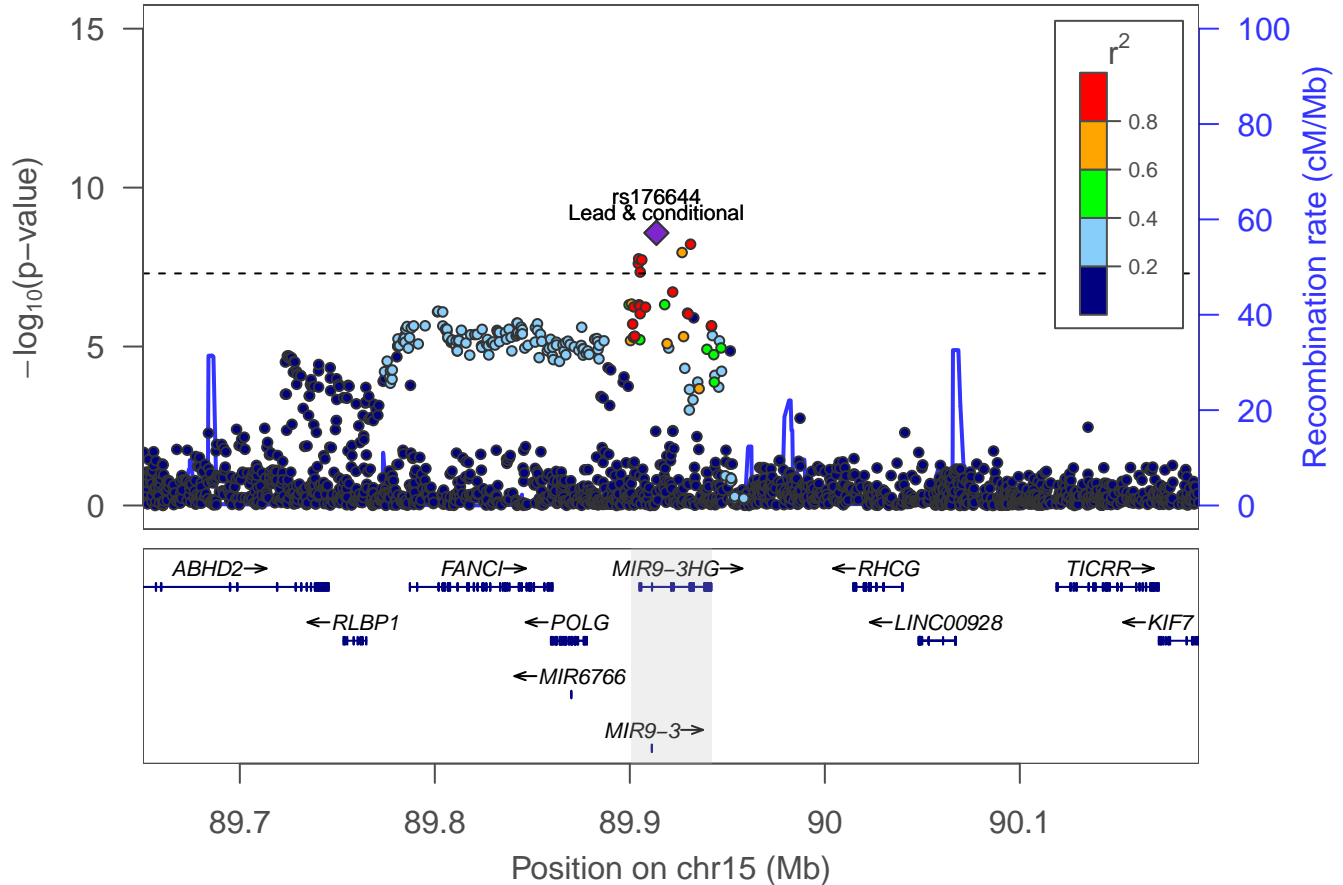

# Ever smoker: locus 158 [chr 15:99.191–99.205Mb]

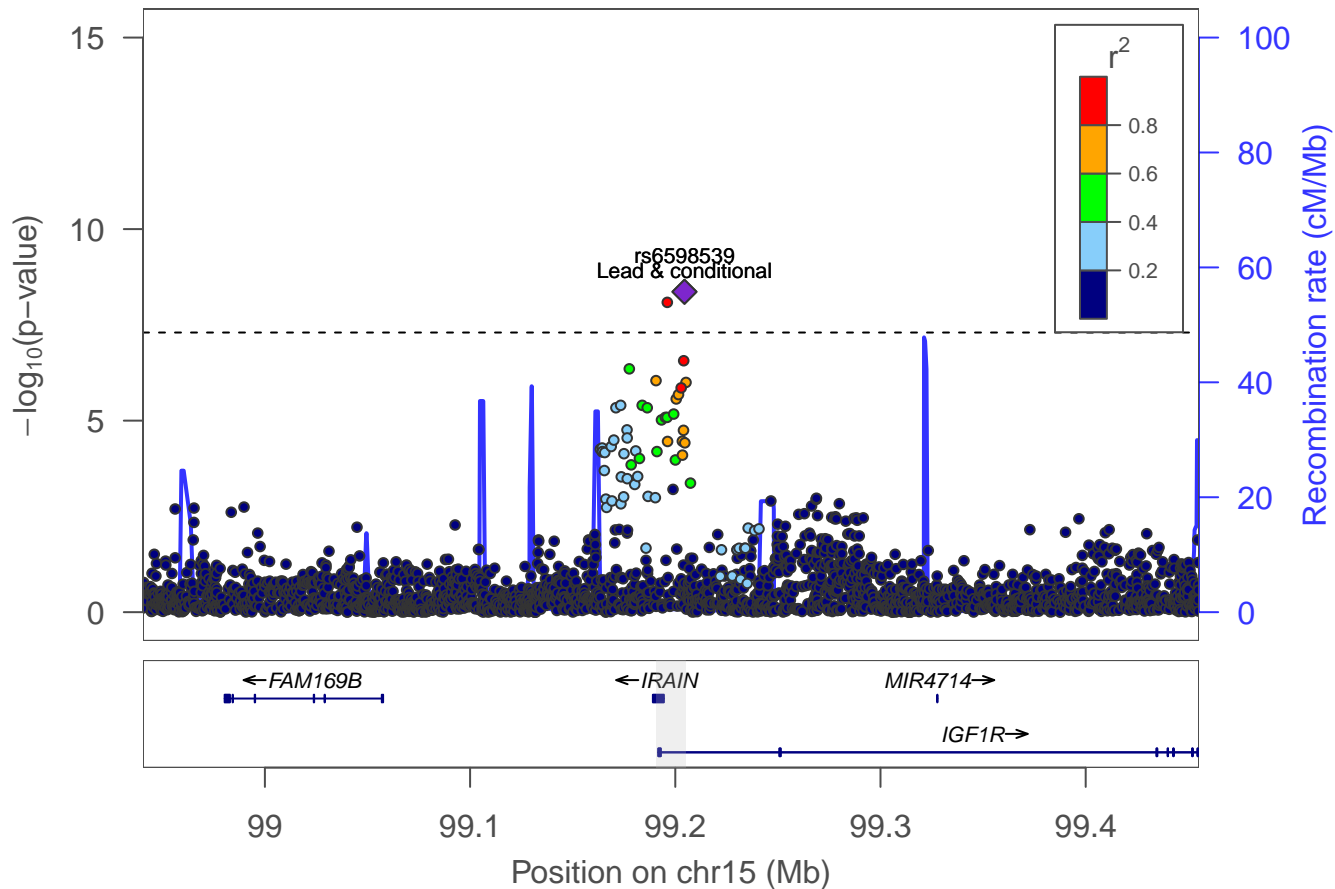

# Ever smoker: locus 159 [chr 16:0.701–0.760Mb]

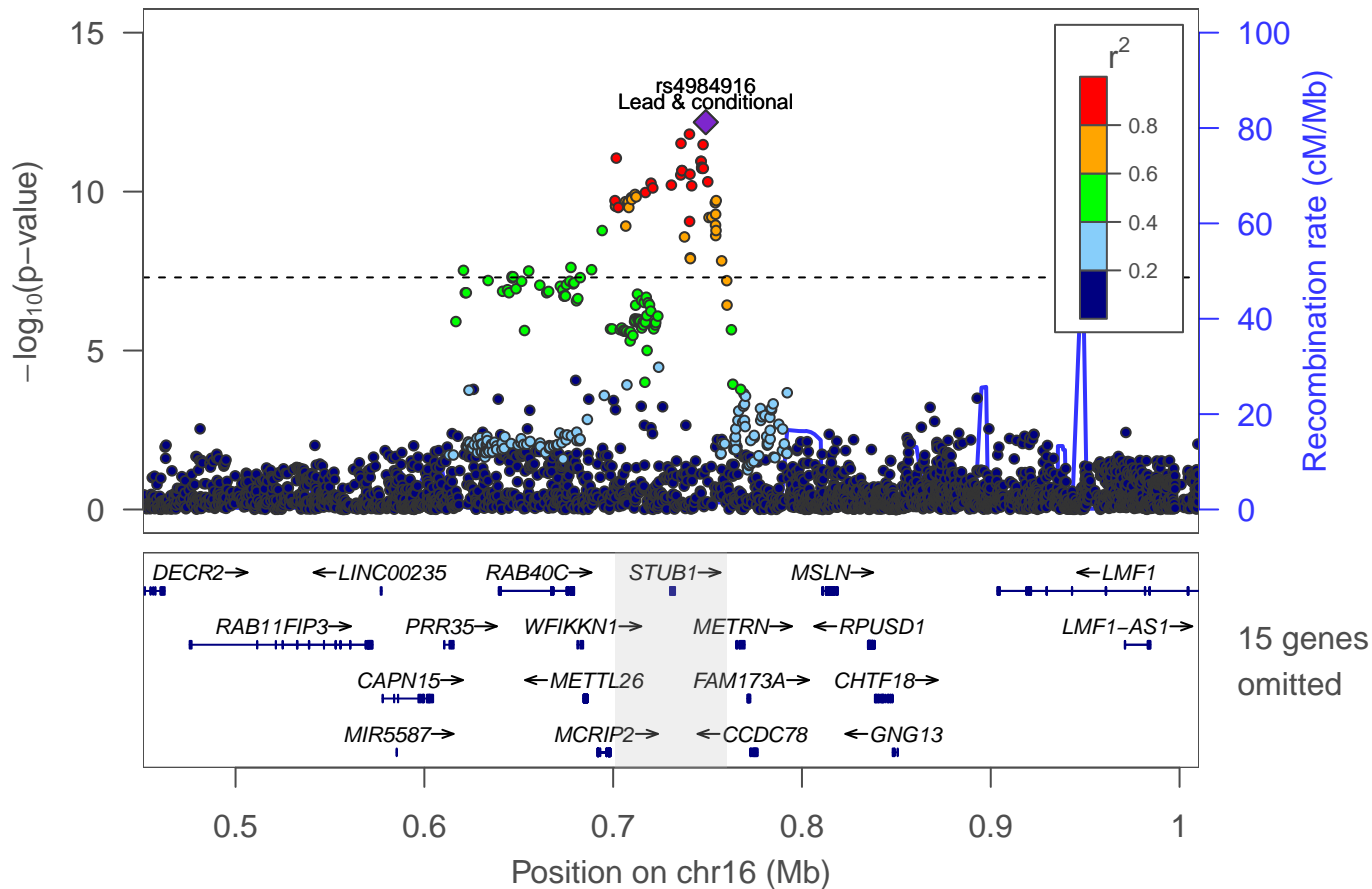

# Ever smoker: locus 160 [chr 16:13.714–13.773Mb]

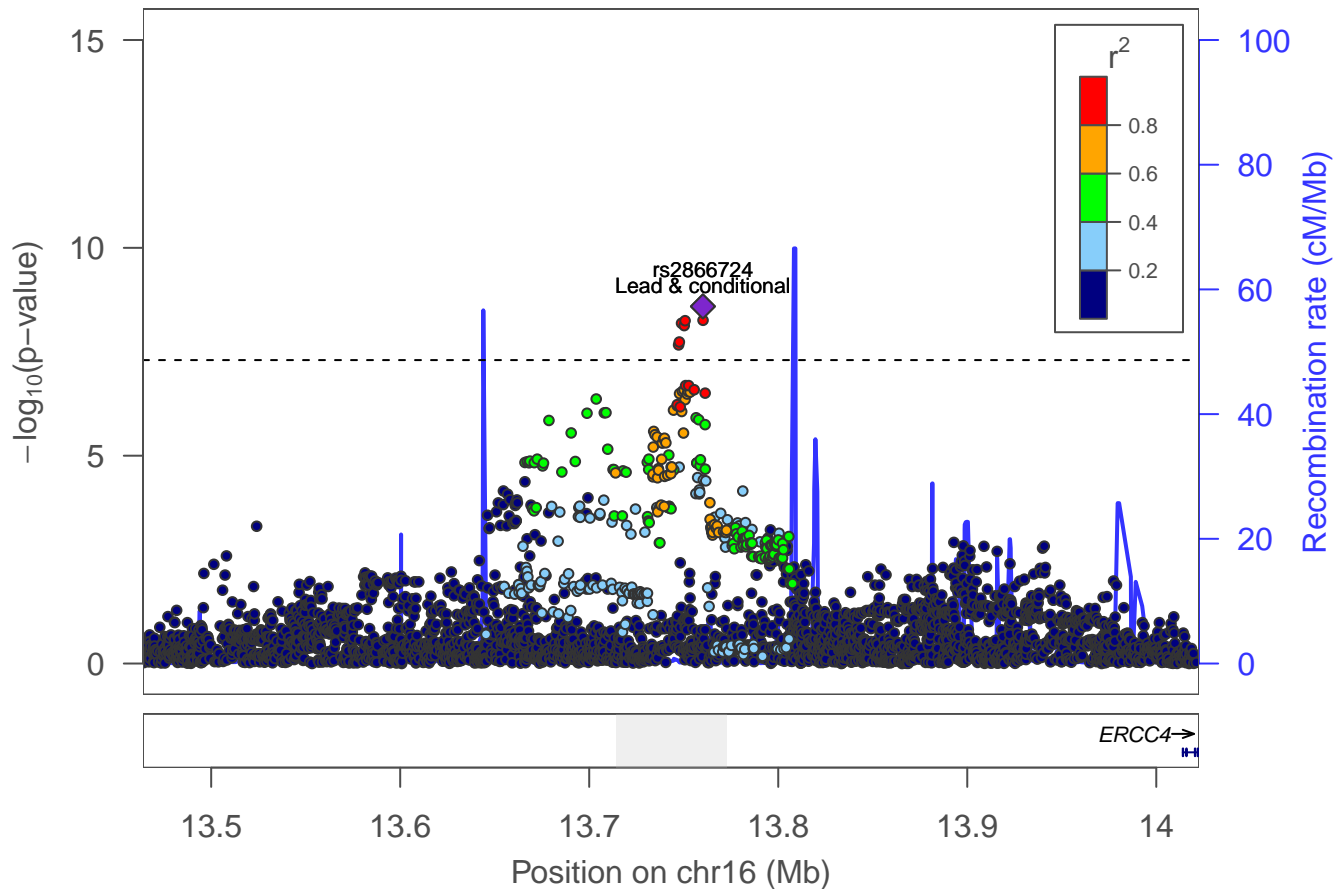

# Ever smoker: locus 161 [chr 16:18.059–18.059Mb]

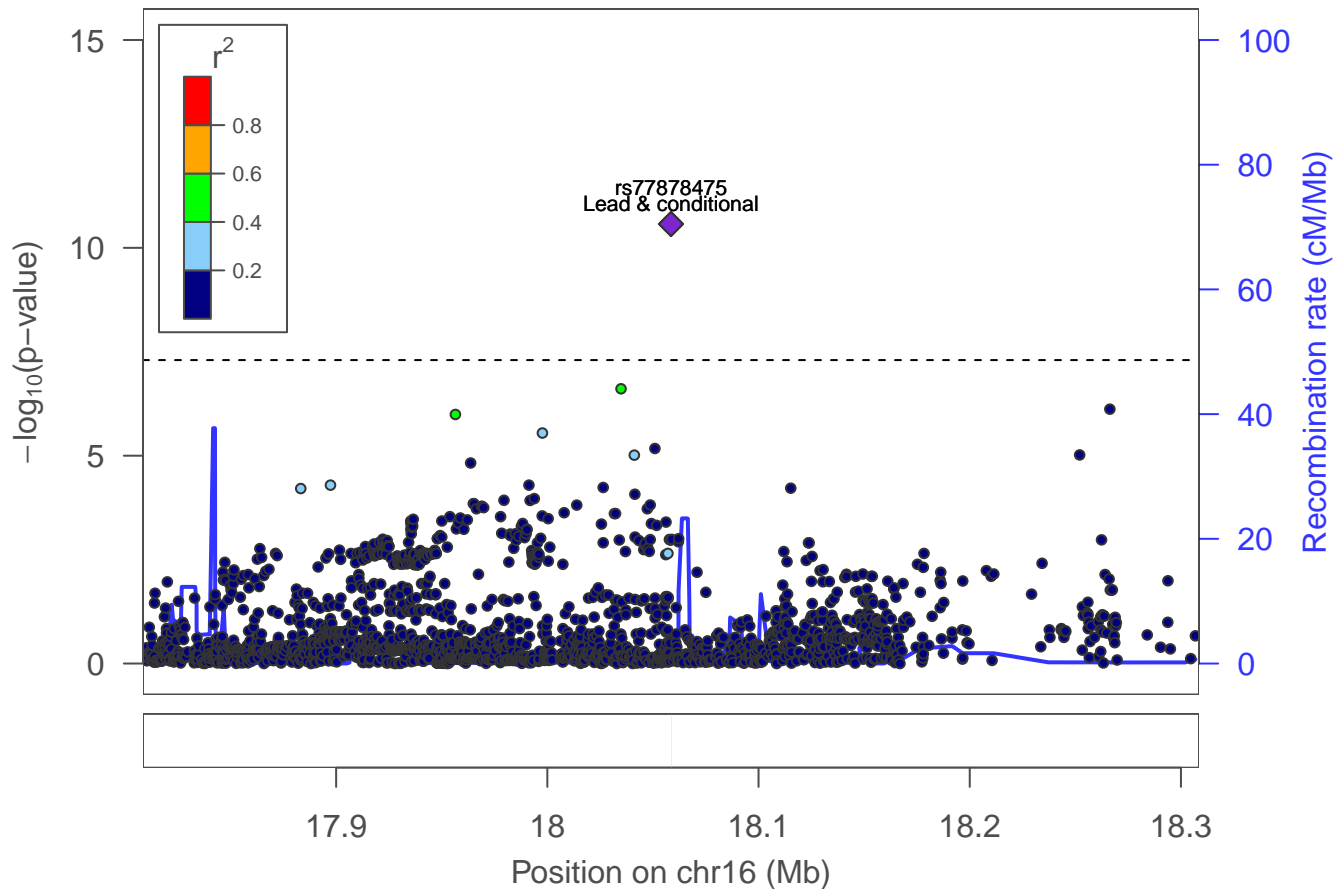

# Ever smoker: locus 162 [chr 16:25.268–25.378Mb]

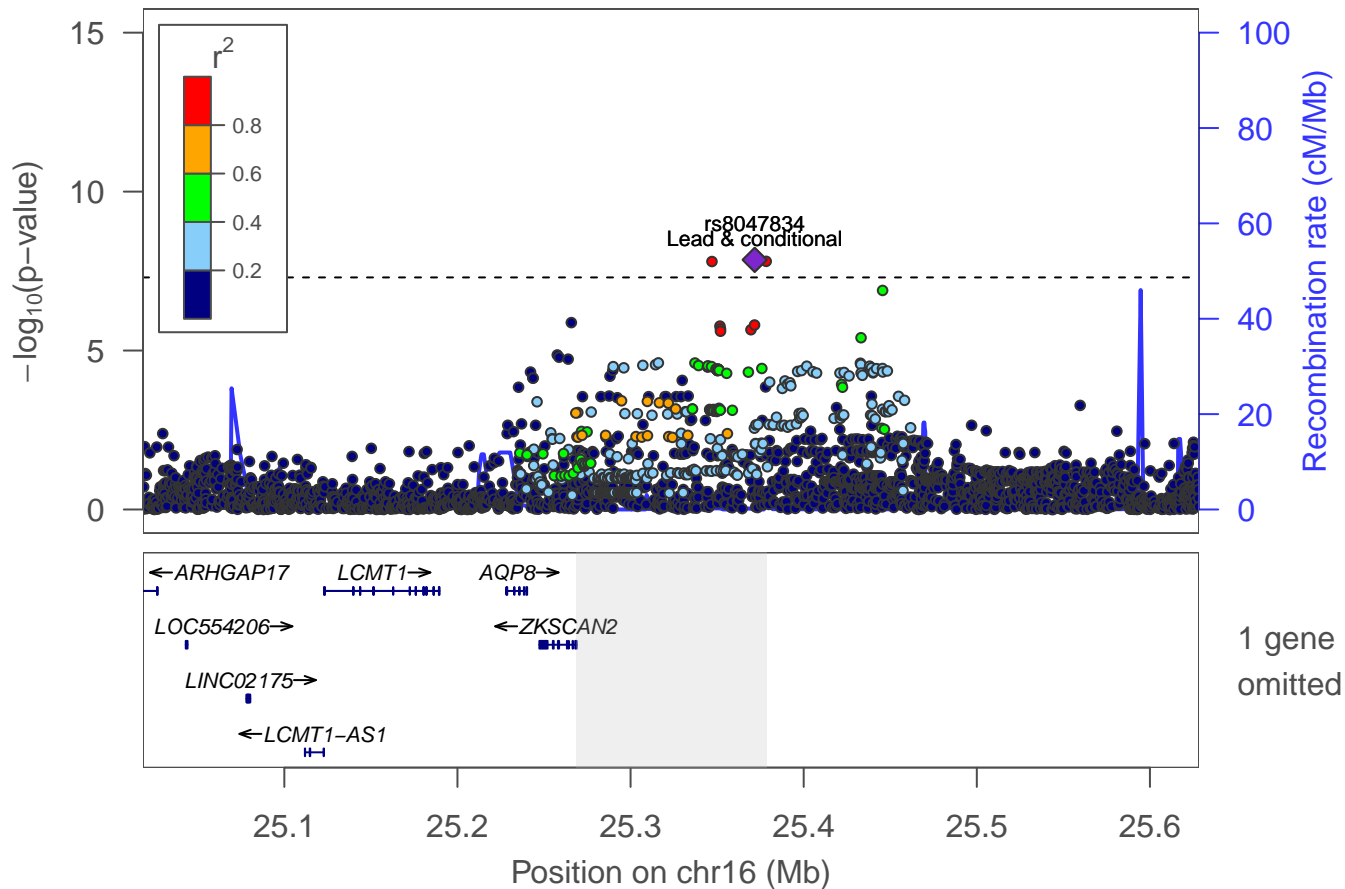

# Ever smoker: locus 163 [chr 16:69.567–69.811Mb]

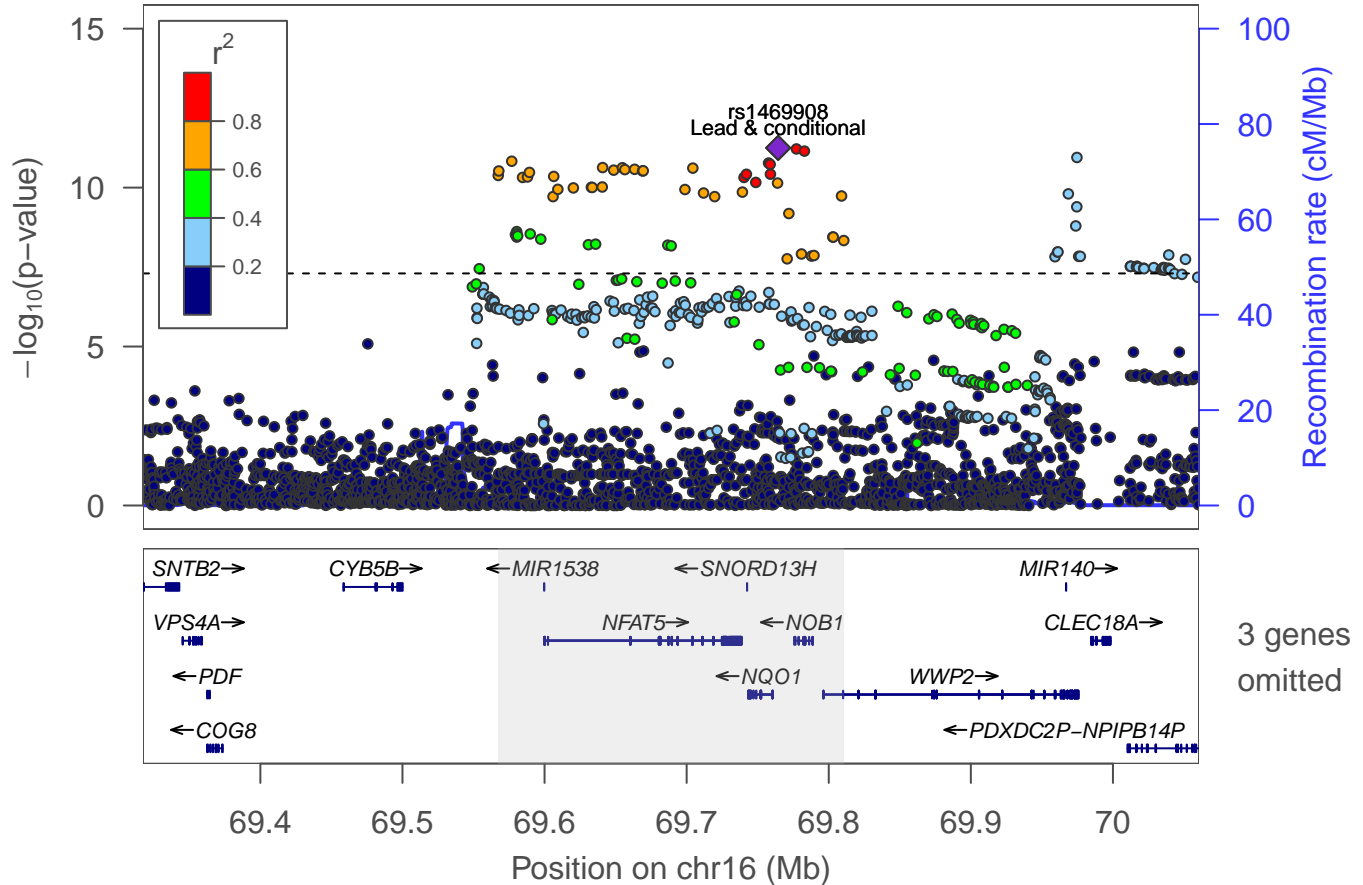



# Ever smoker: locus 164 [chr 16:72.937–72.979Mb]

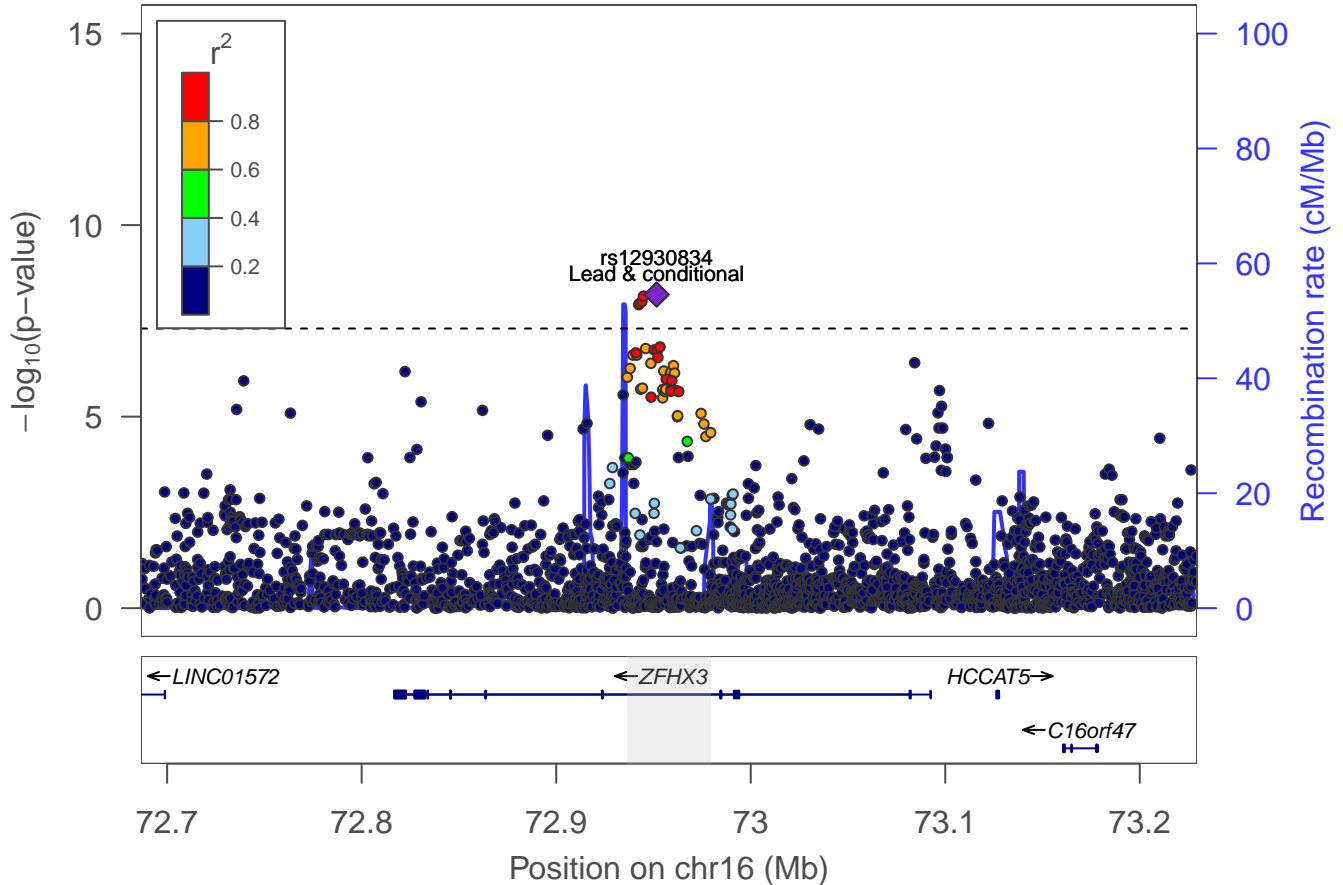

# Ever smoker: locus 165 [chr 16:73.810–73.810Mb]

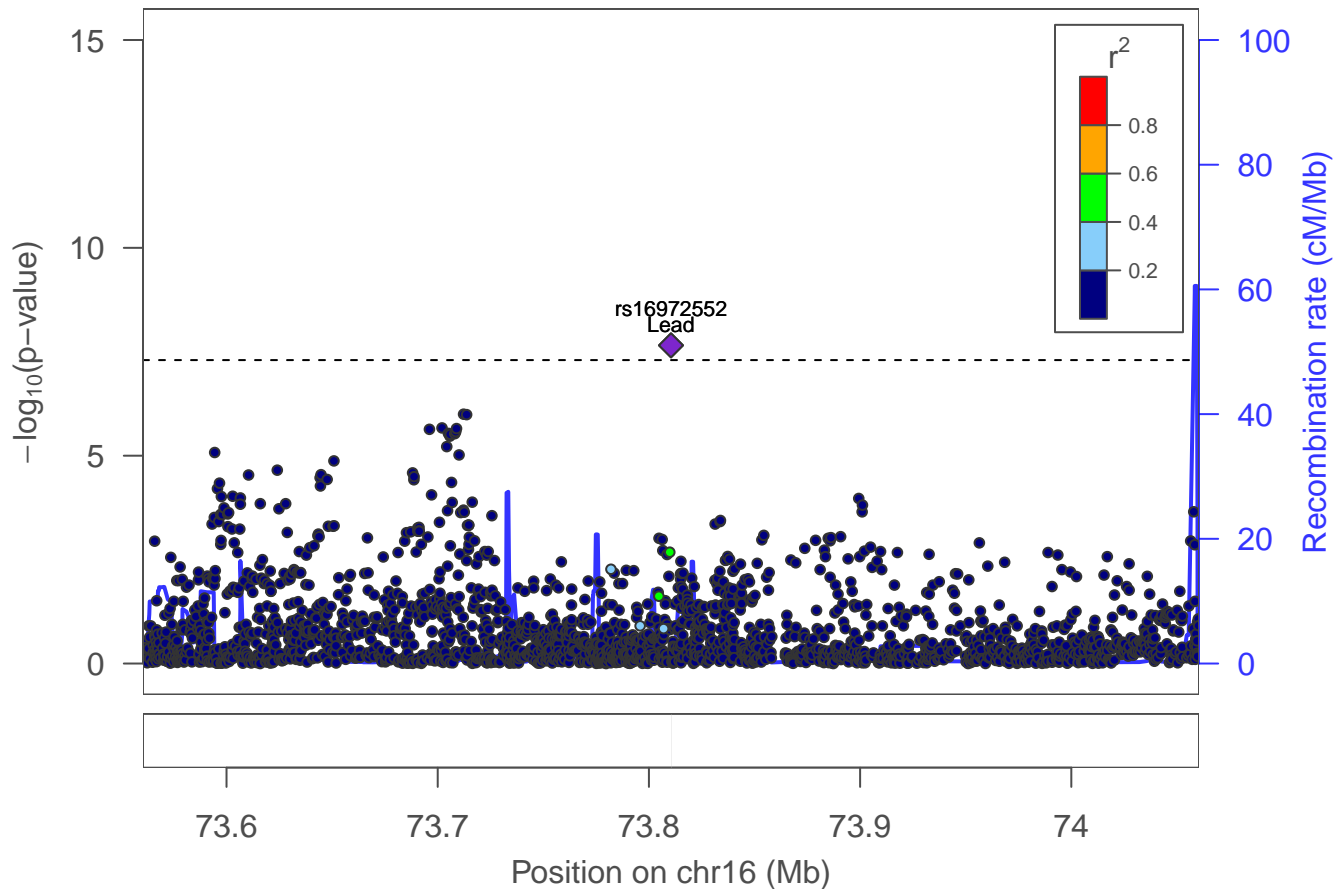

# Ever smoker: locus 166 [chr 16:75.537–75.785Mb]

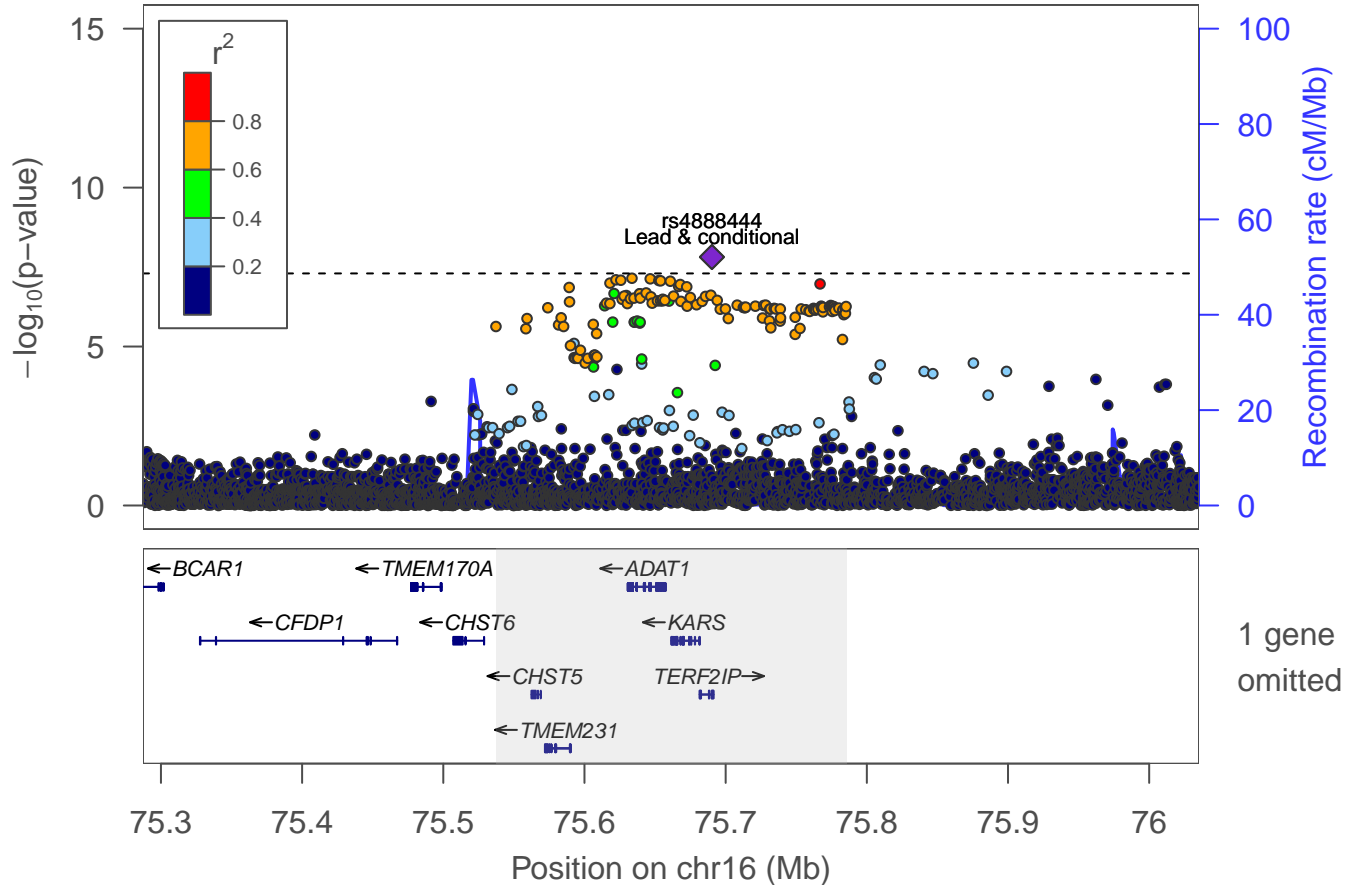

# Ever smoker: locus 167 [chr 16:76.433–76.482Mb]

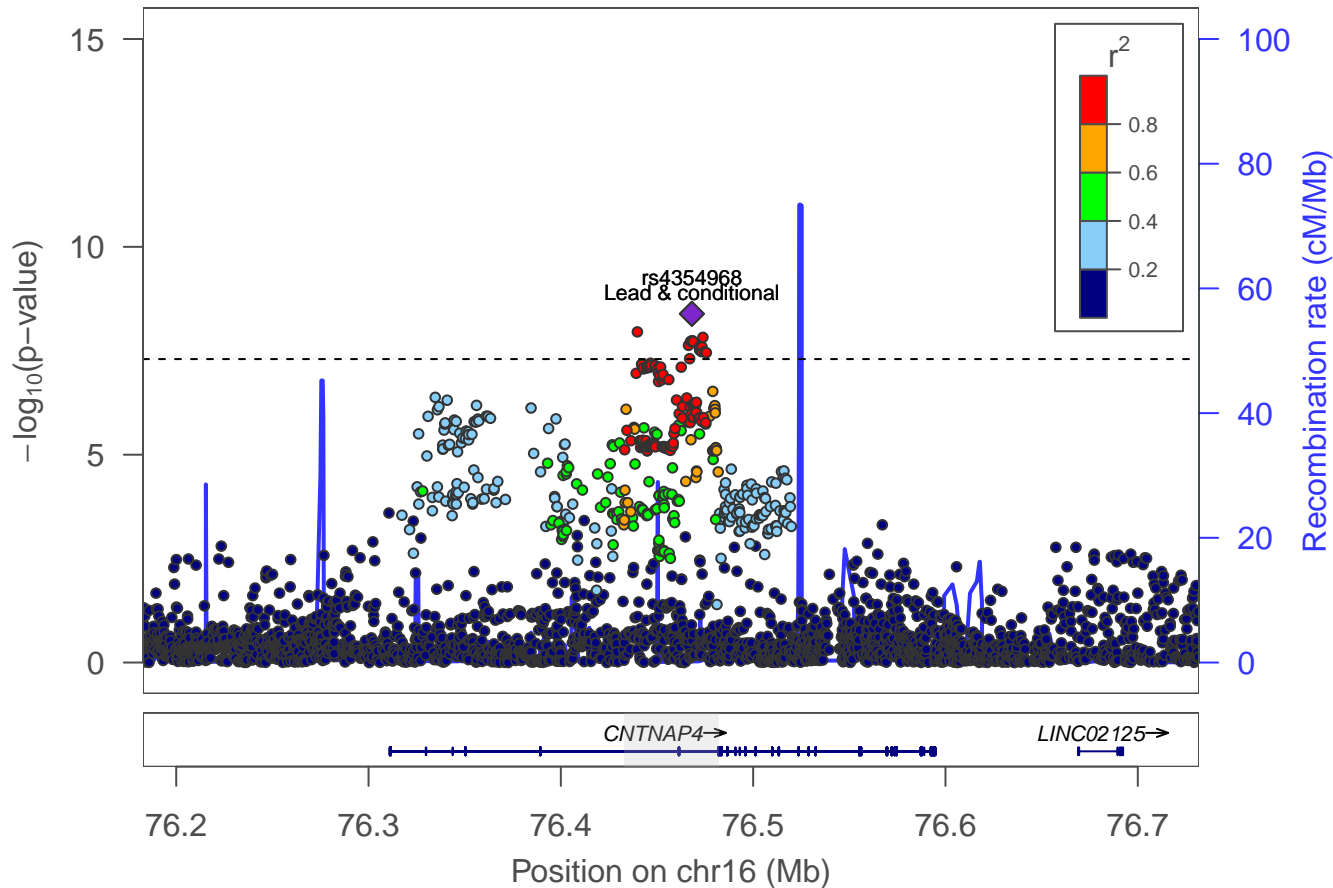

# Ever smoker: locus 168 [chr 17:1.959–2.008Mb]

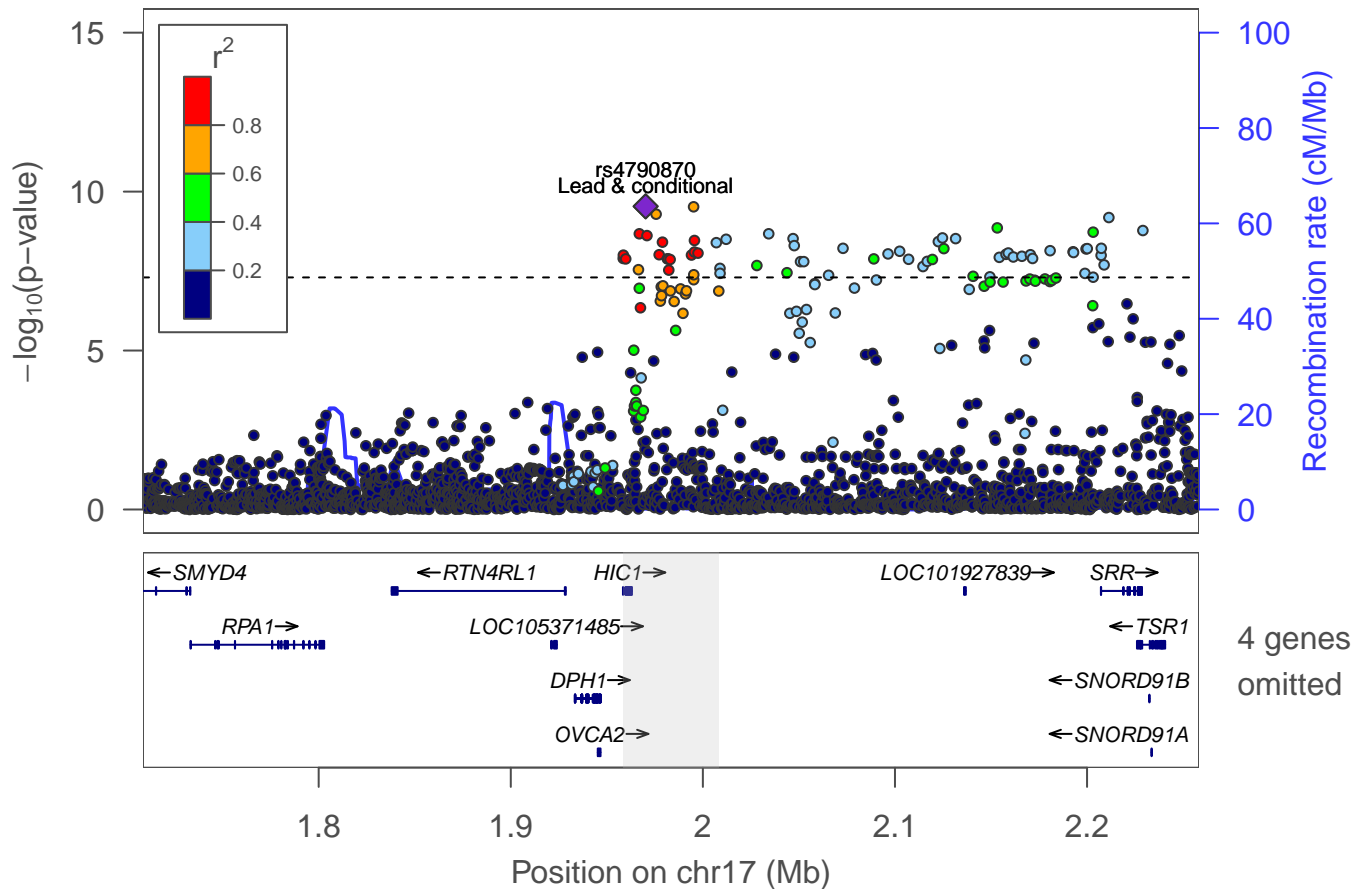

# Ever smoker: Locus 169 [chr 17: 50.177–50.342Mb]

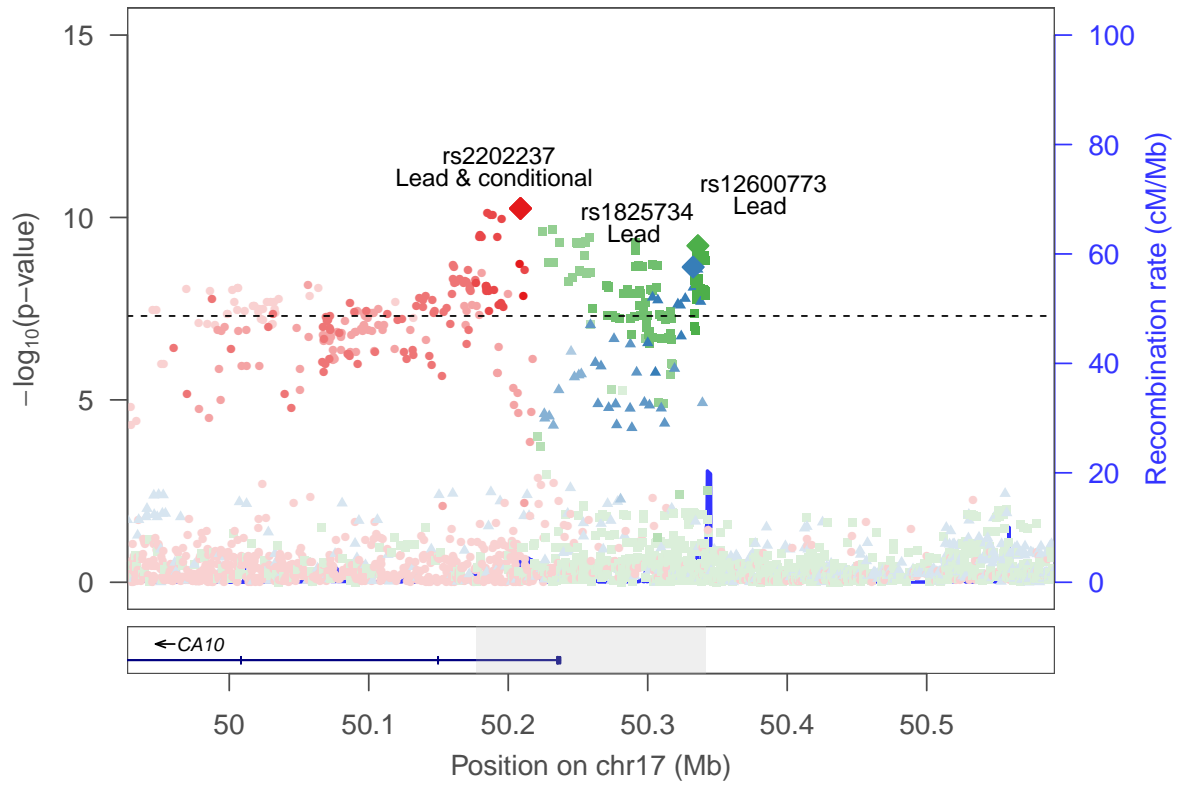

rs12600773 ■  
rs1825734 ▲  
rs2202237 ●

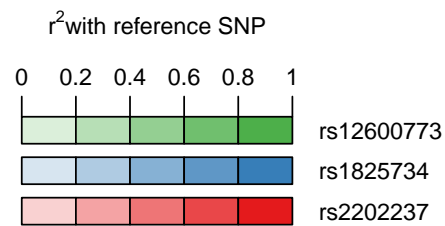

# Ever smoker: locus 170 [chr 17:77.769–77.801Mb]

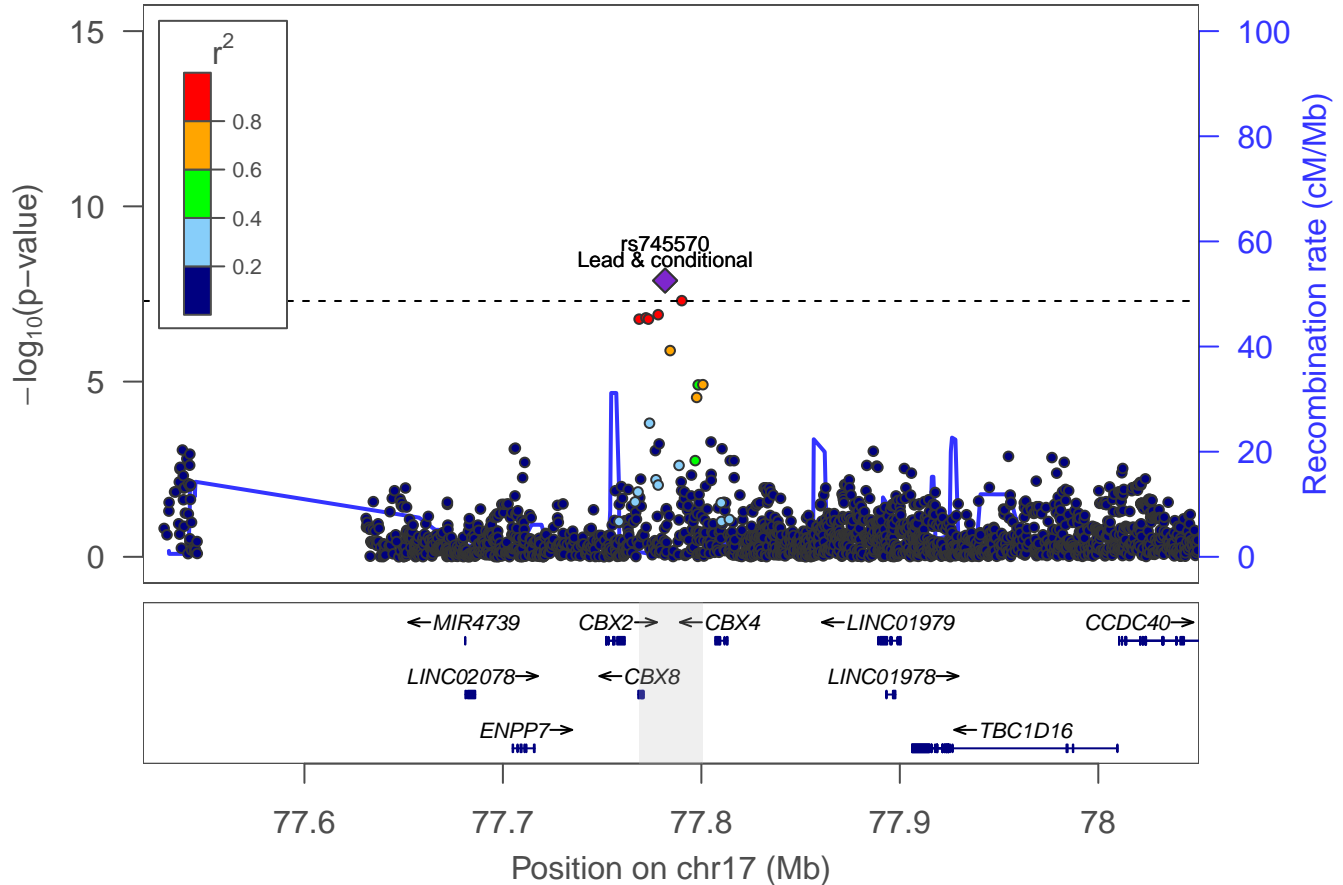

# Ever smoker: locus 171 [chr 18:0.133–0.293Mb]

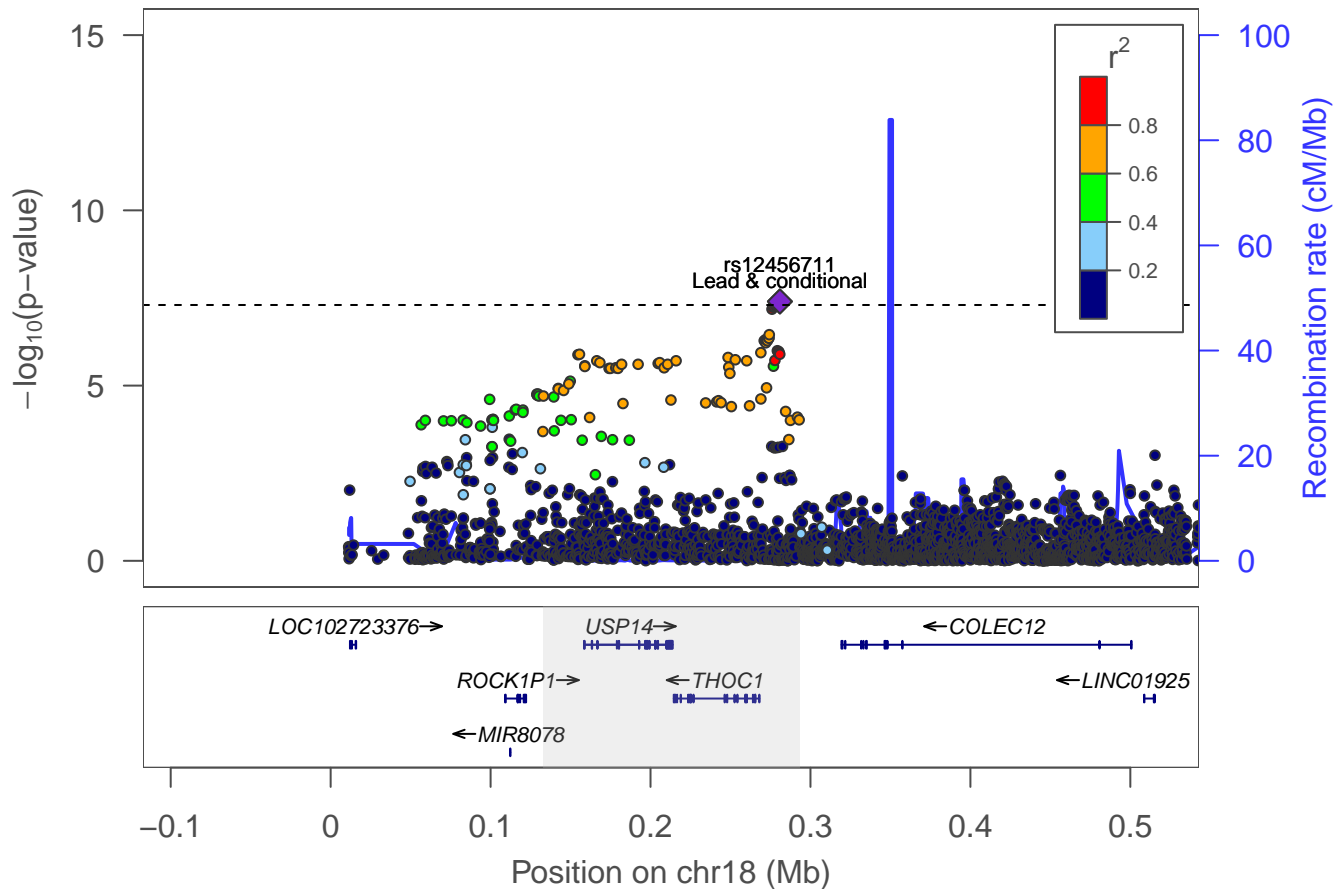



# Ever smoker: locus 172 [chr 18:42.669–42.736Mb]

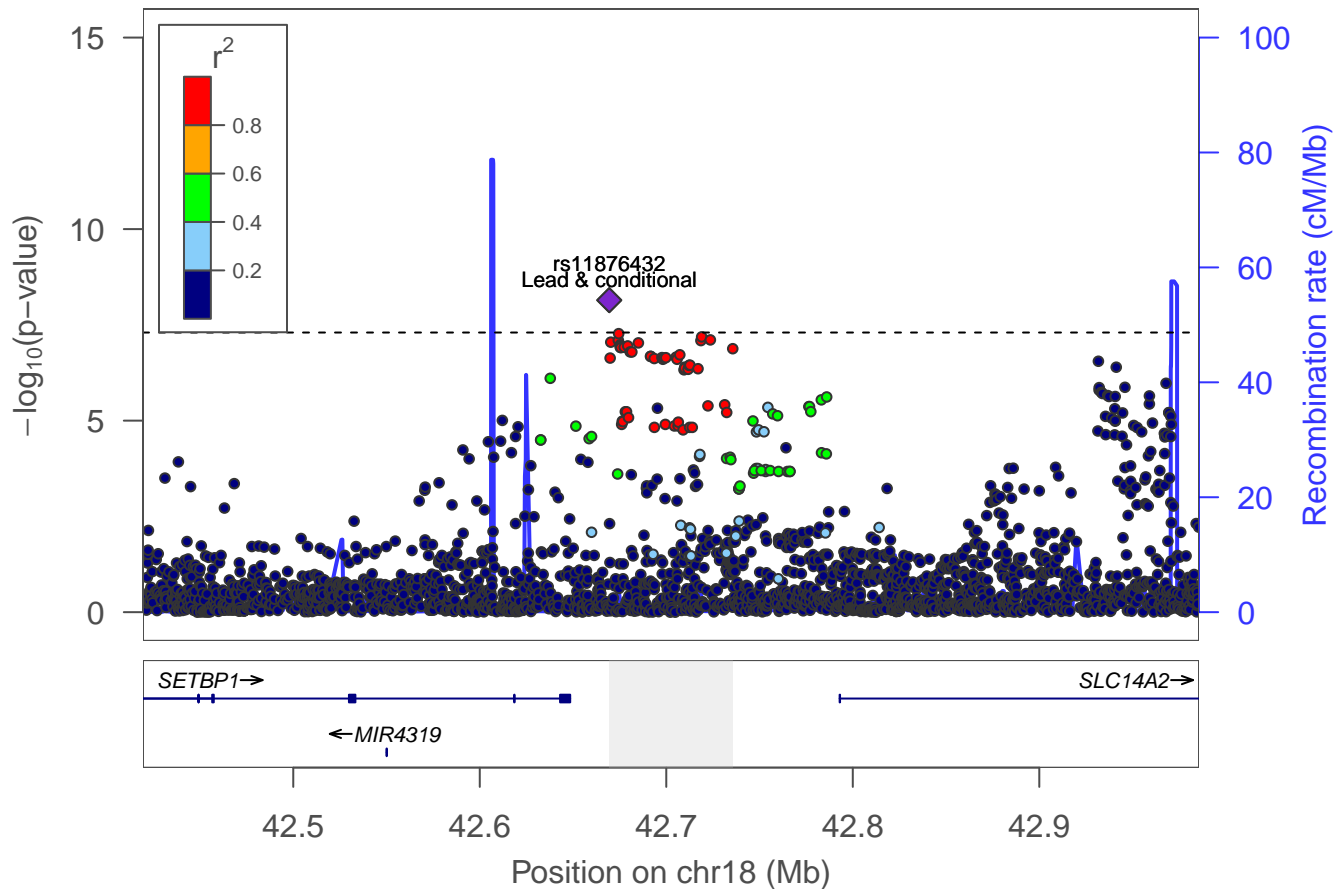

# Ever smoker: Locus 173 [chr 18: 49.841–50.024Mb]

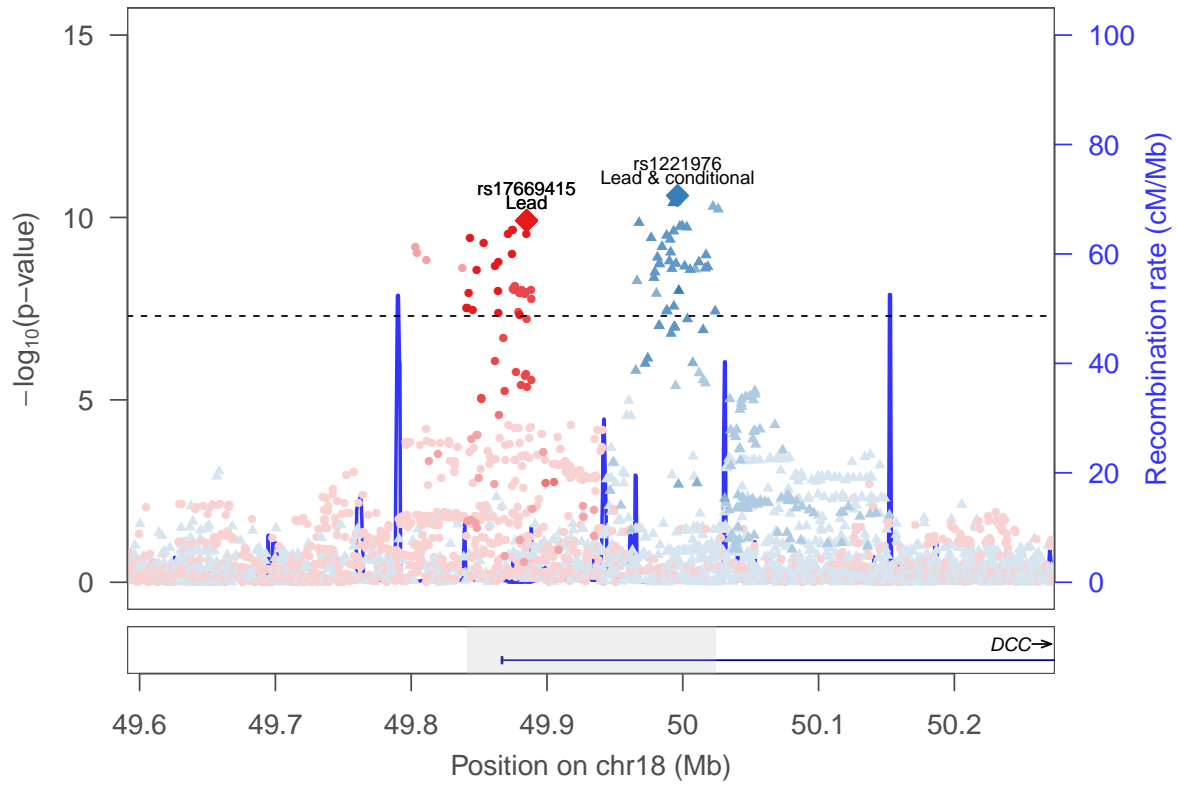

rs1221976 ▲  
rs17669415 ●

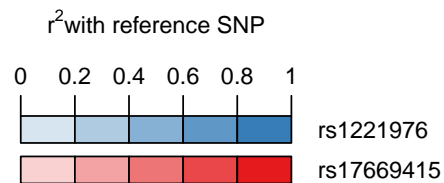

# Ever smoker: locus 174 [chr 18:53.720–53.720Mb]

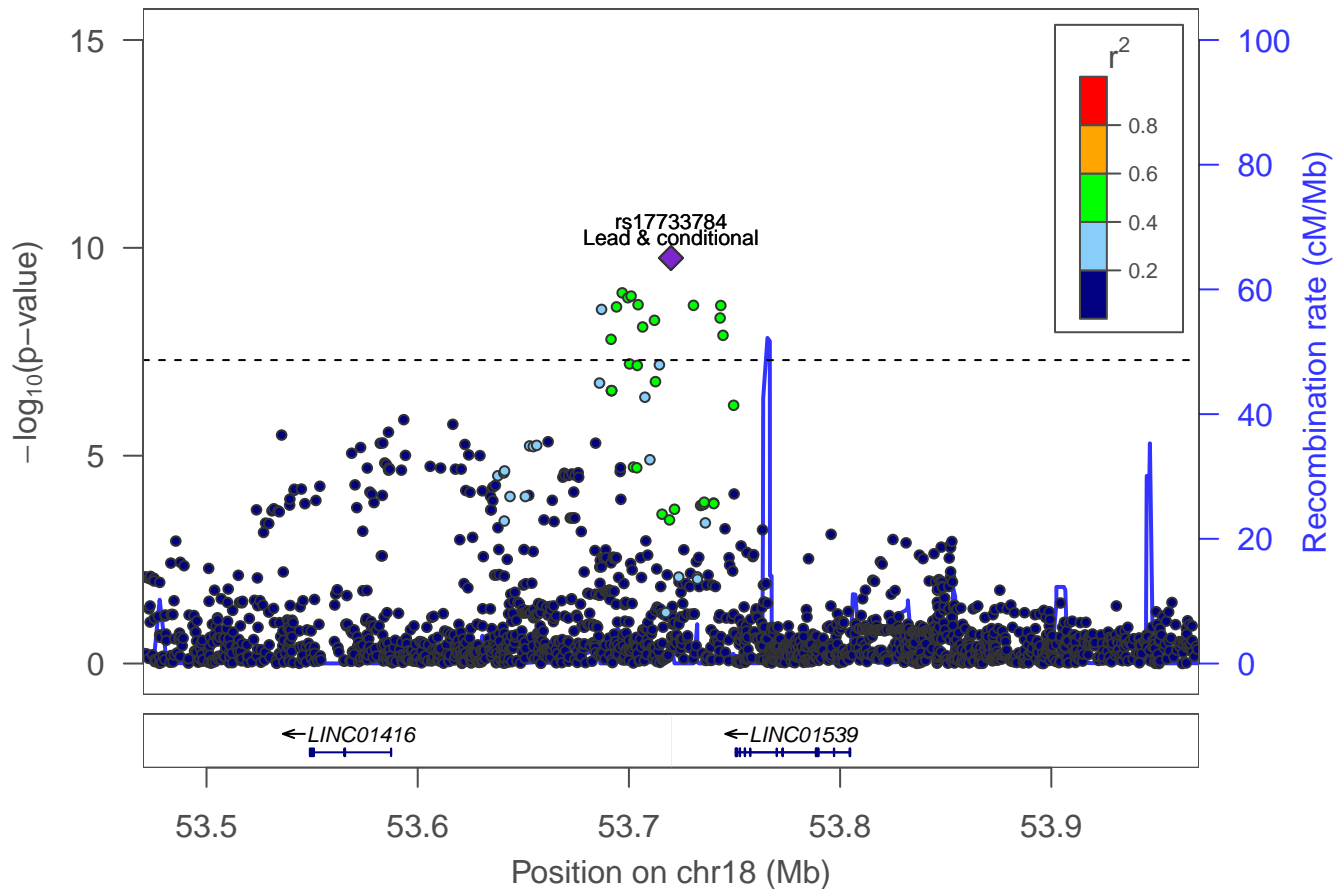

# Ever smoker: locus 175 [chr 18:72.457–72.657Mb]

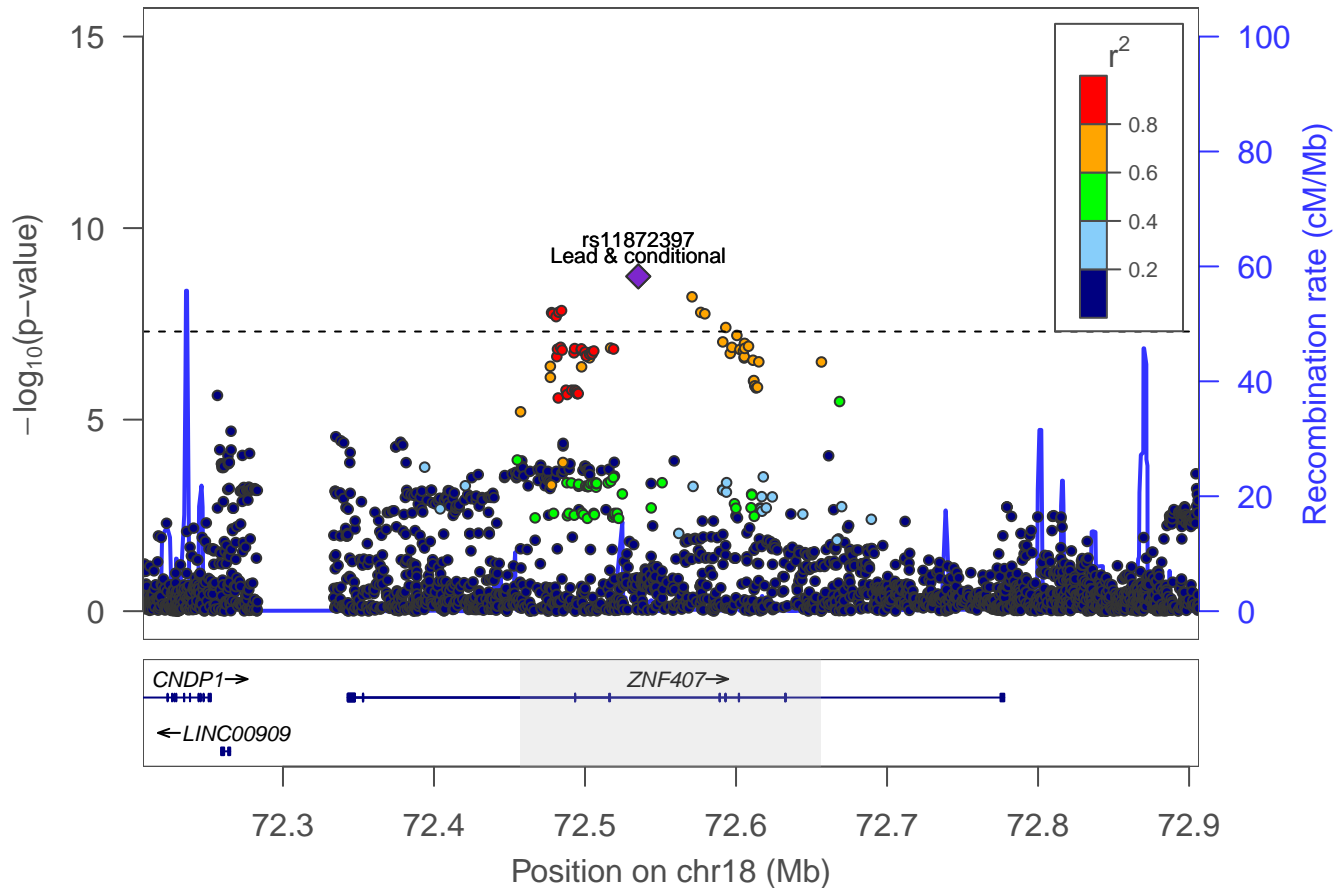

# Ever smoker: locus 176 [chr 18:77.552–77.581Mb]

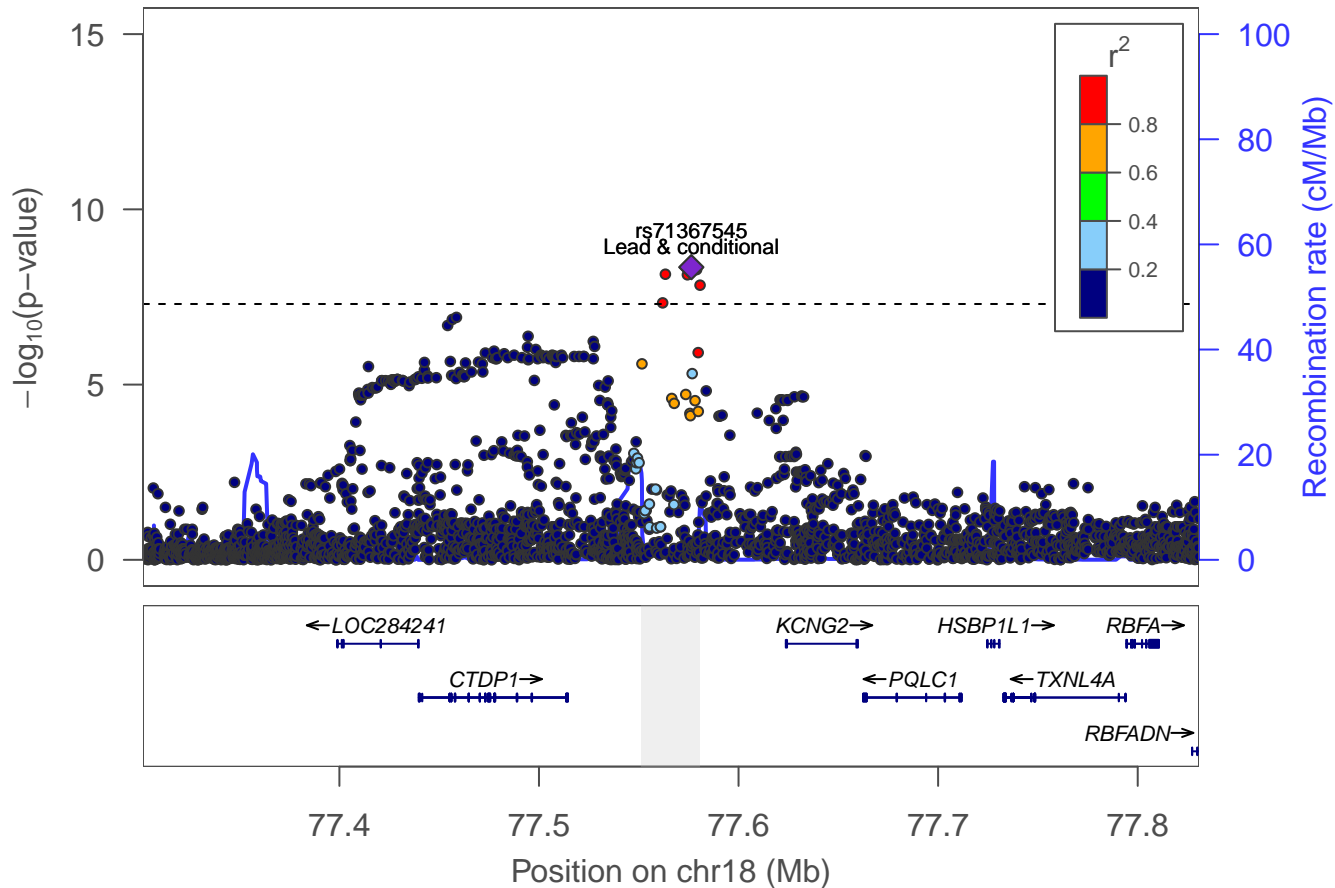

# Ever smoker: locus 177 [chr 19:4.387–4.475Mb]

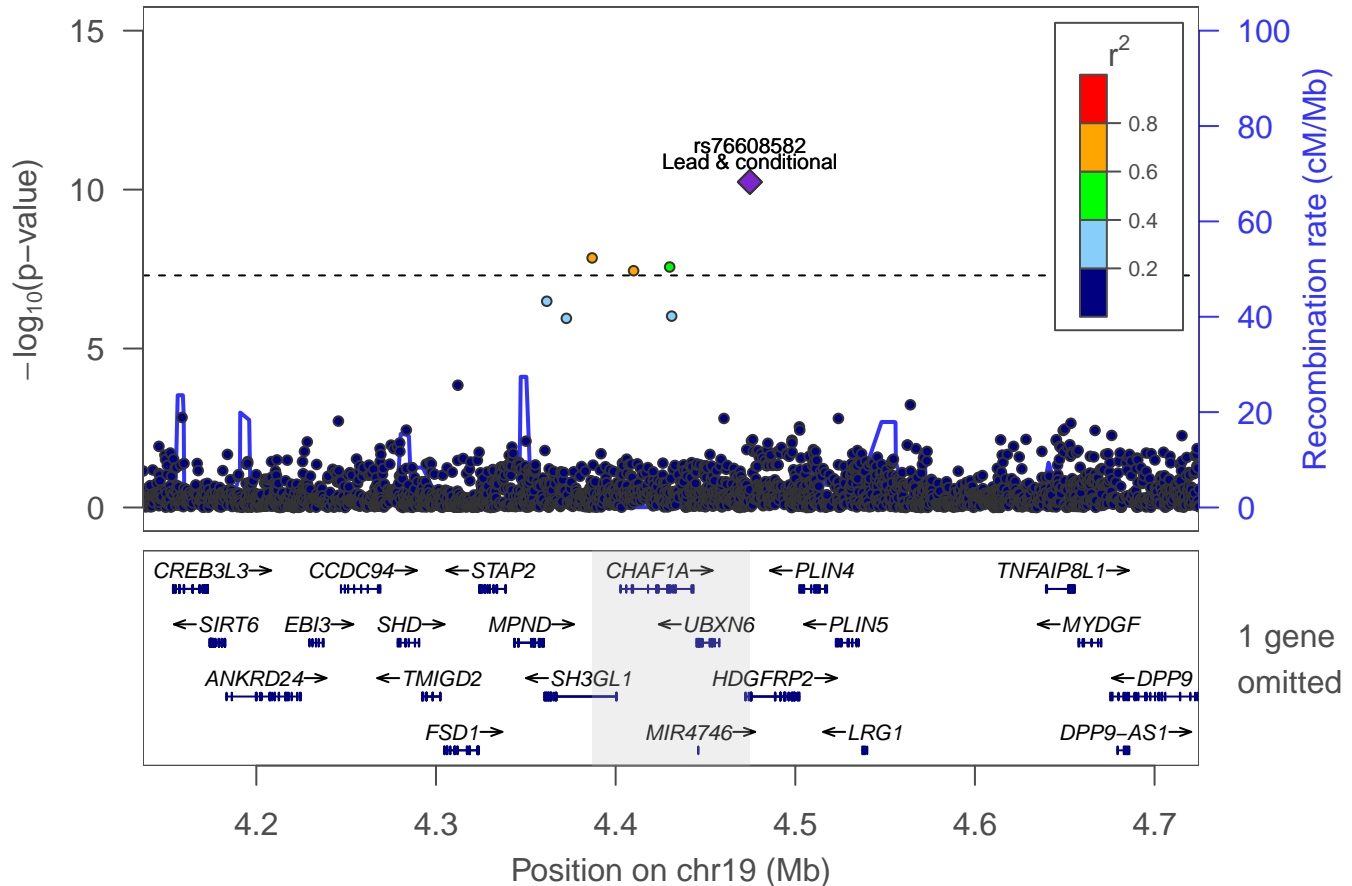

# Ever smoker: locus 178 [chr 20:19.656–19.702Mb]

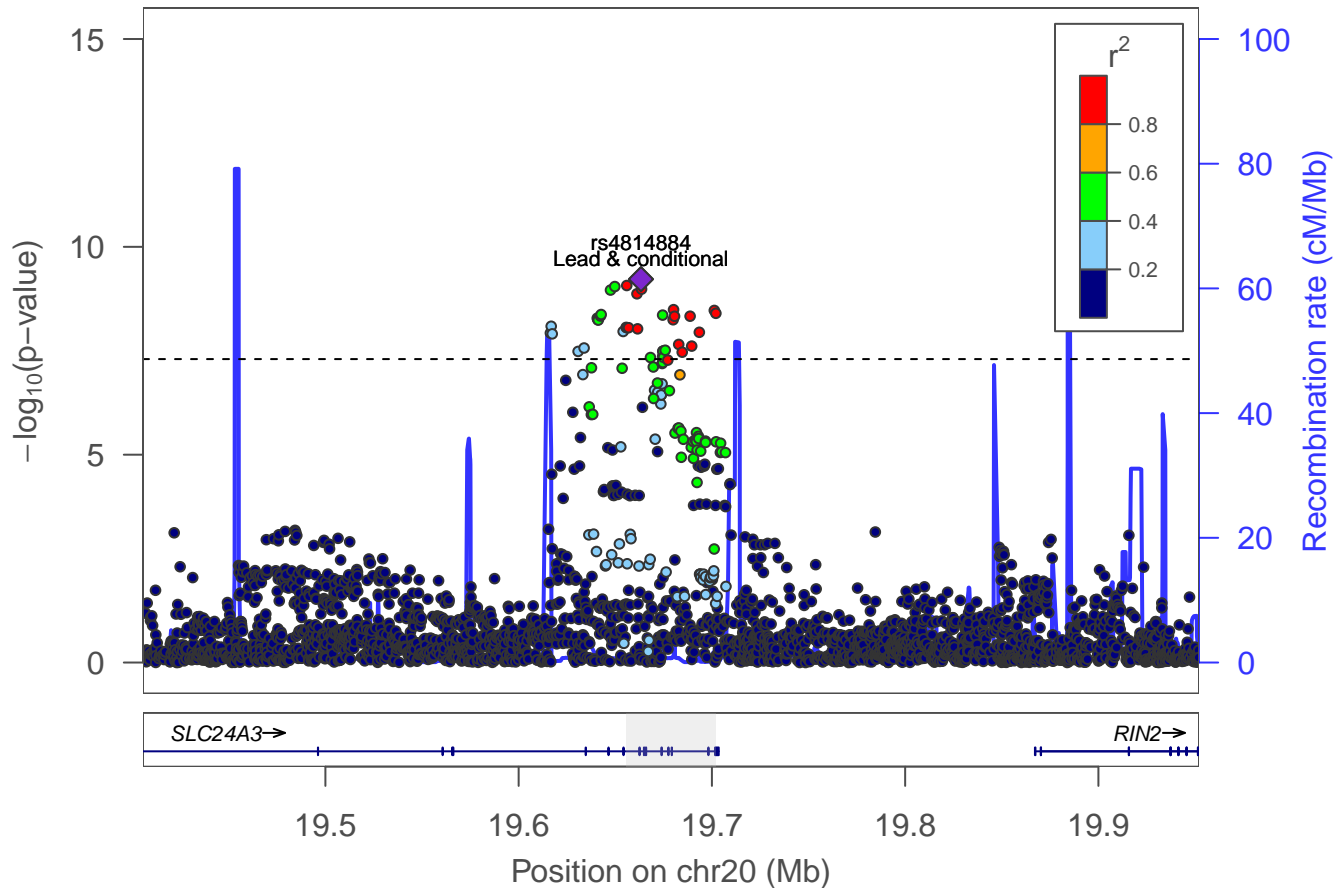

# Ever smoker: locus 179 [chr 20:26.118–30.435Mb]

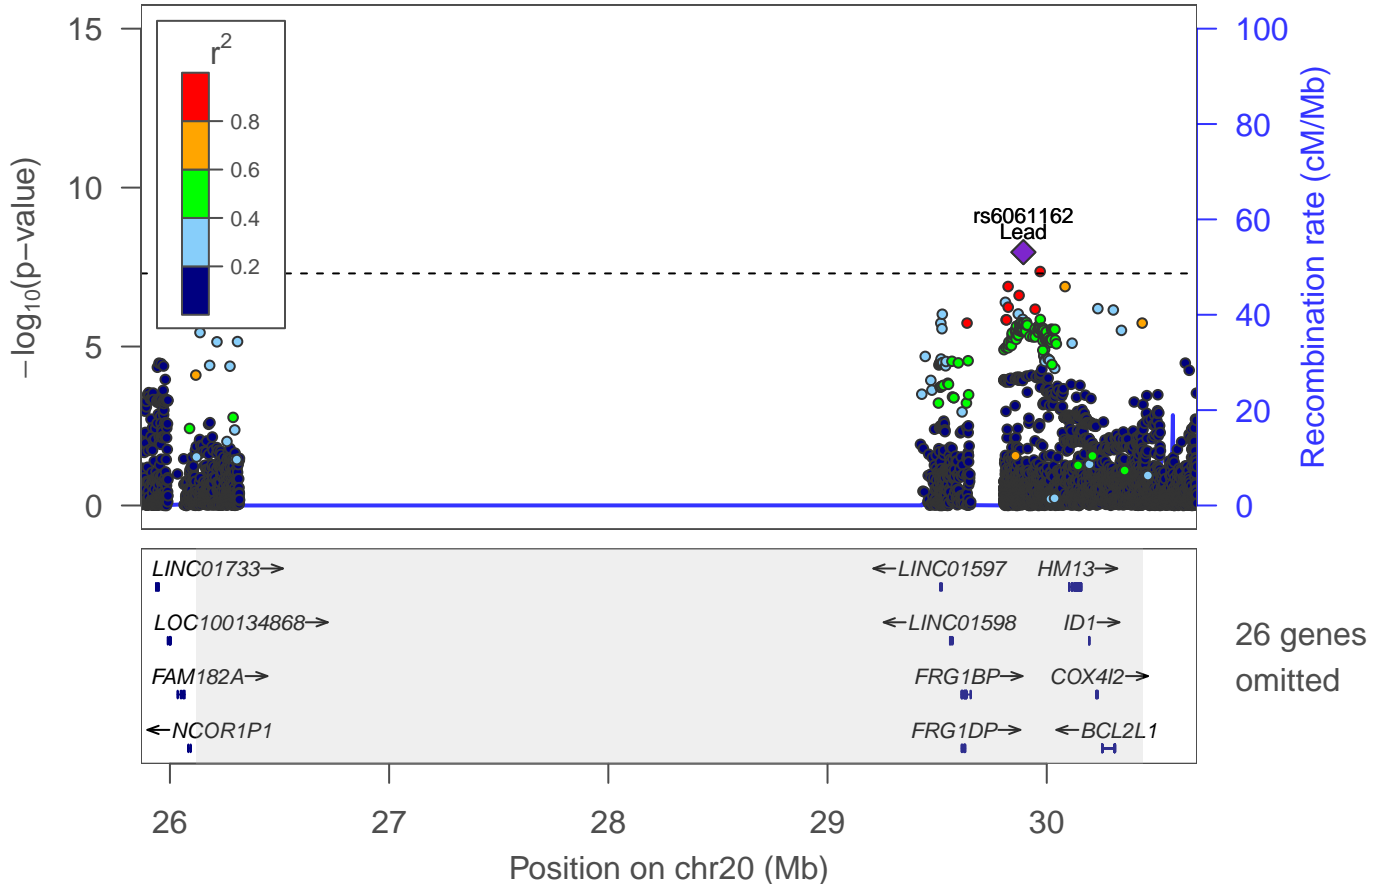

Note: The gap in the locus is because the locus spans the centromere of the chromosome.





# Ever smoker: locus 181 [chr 20:32.904–33.530Mb]

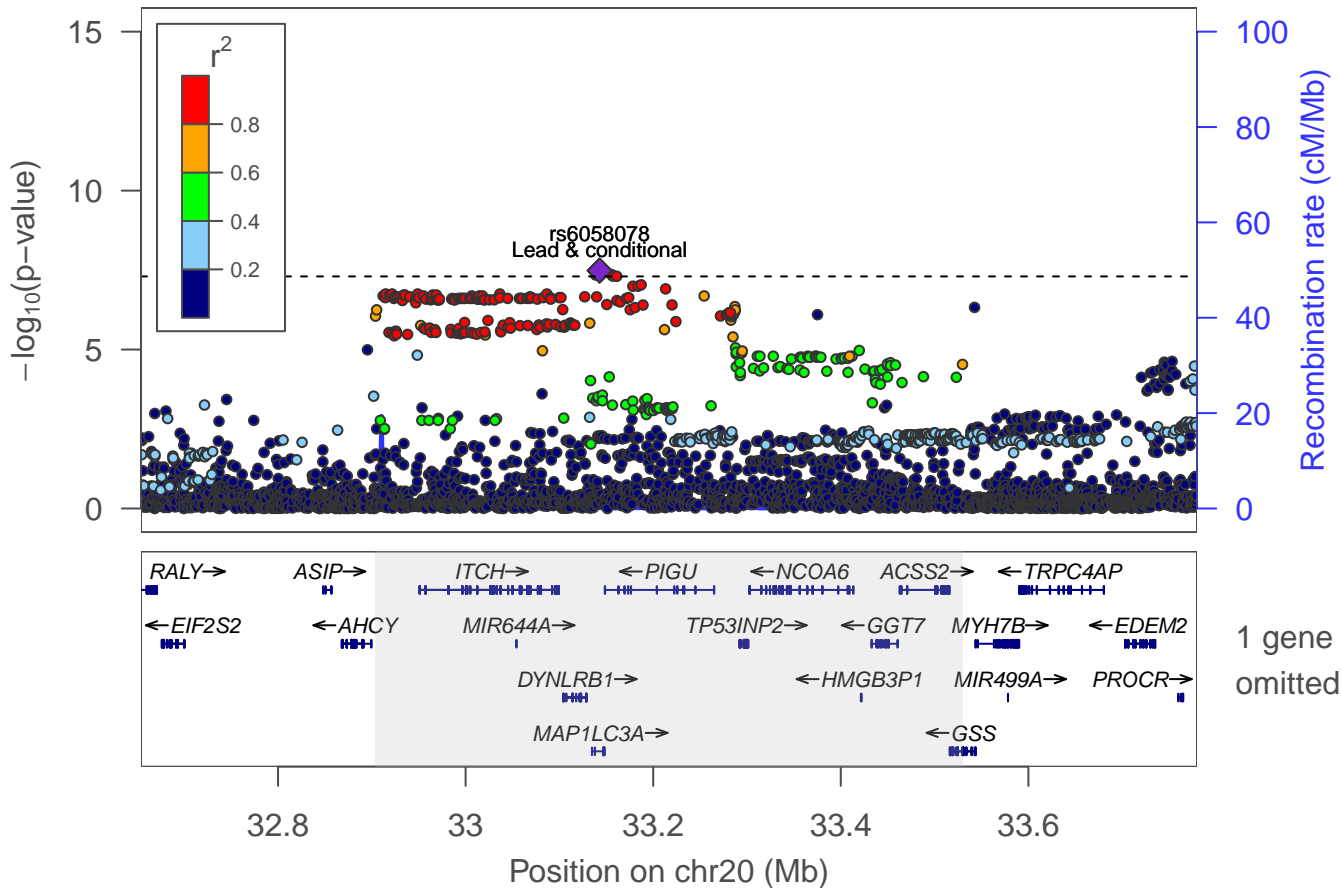

# Ever smoker: locus 182 [chr 21:40.556–40.719Mb]

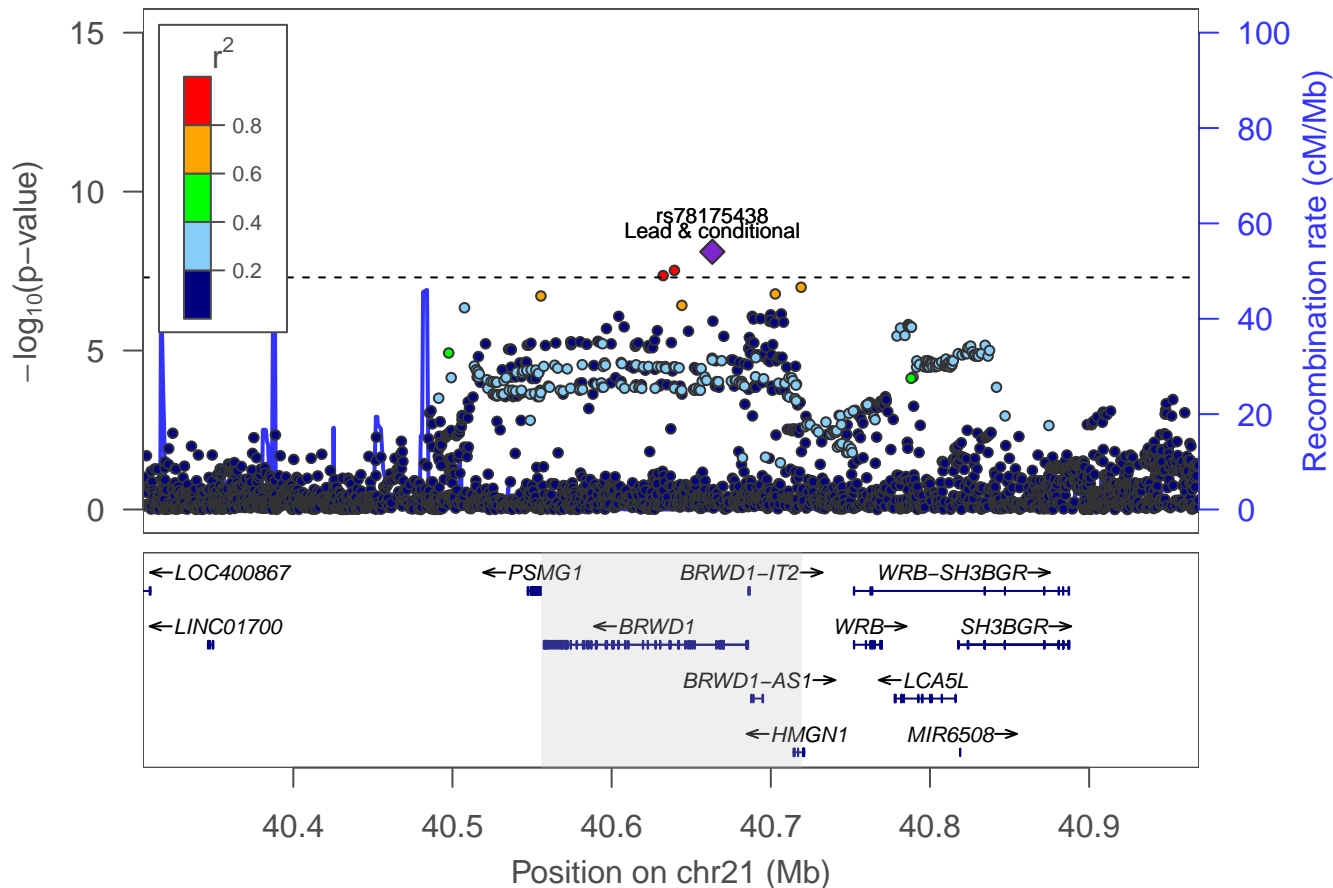

# Ever smoker: locus 183 [chr 22:38.212–38.448Mb]

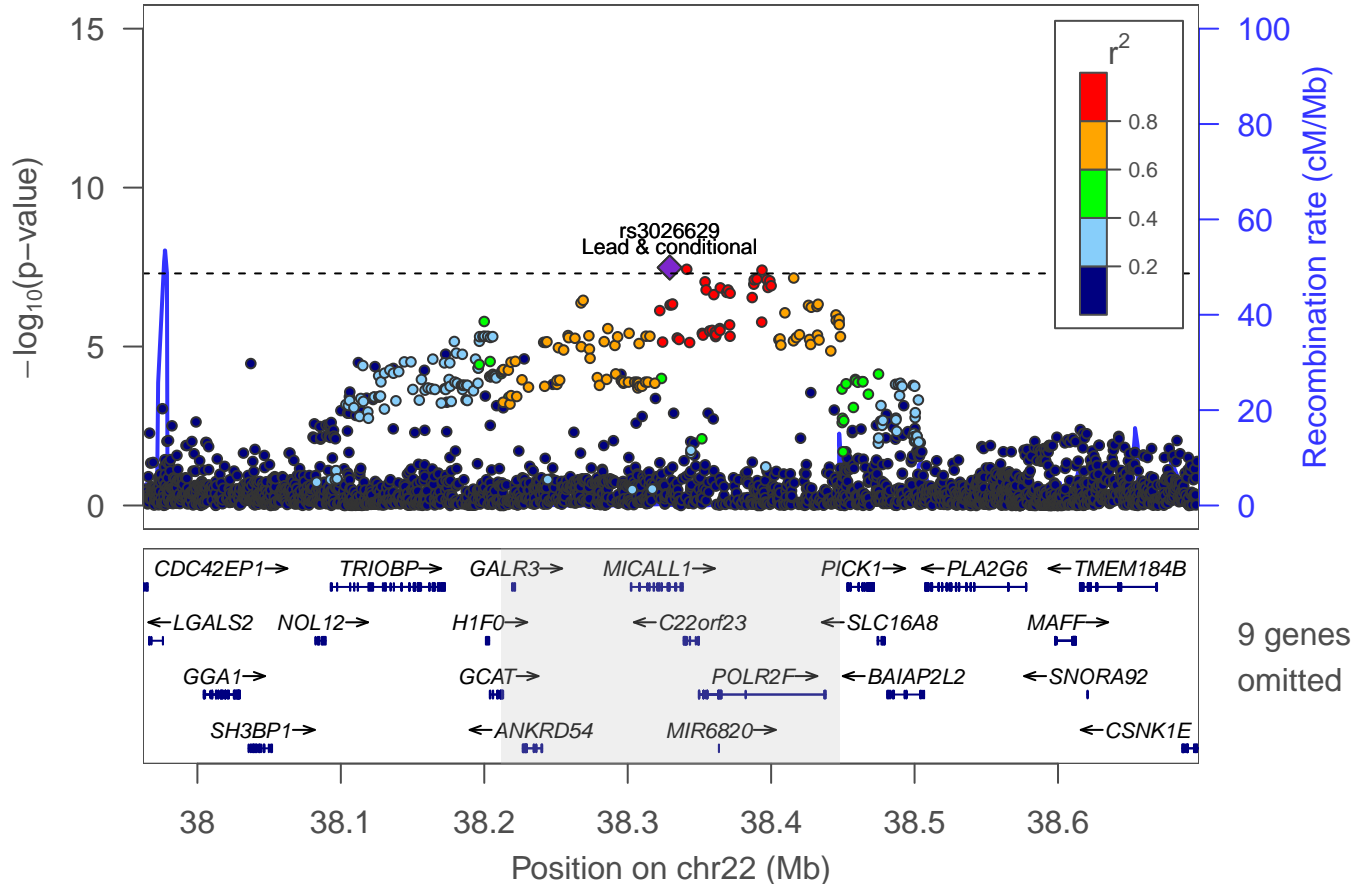

LocusZoom plots for the 98 loci identified  
in the GWAS of number of sexual partners

# Number of sexual partners: locus 1 [chr 1:44.019–44.197Mb]

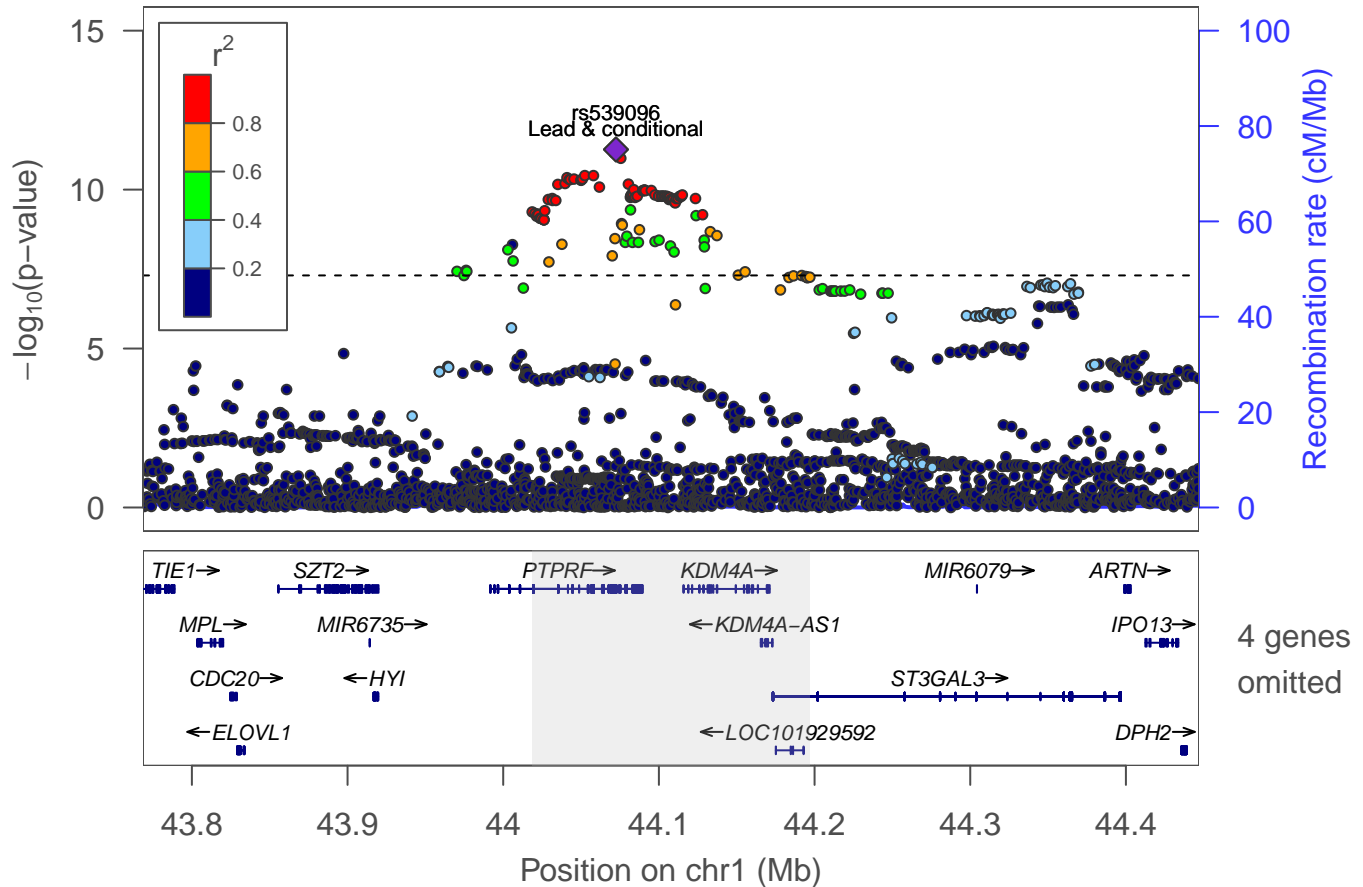

# Number of sexual partners: locus 2 [chr 1:53.661–53.752Mb]

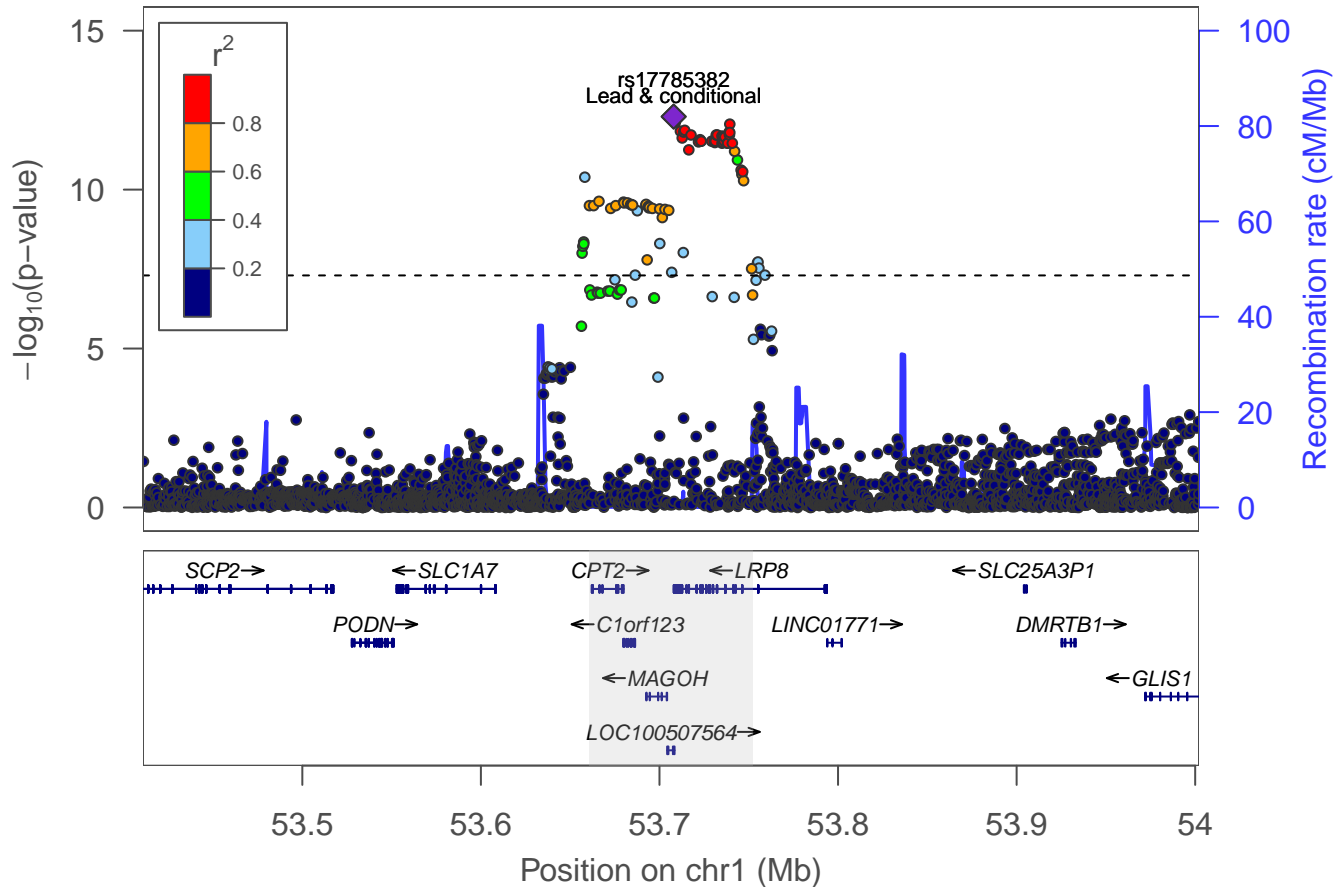

# Number of sexual partners: Locus 3 [chr 1: 61.672–61.743Mb]

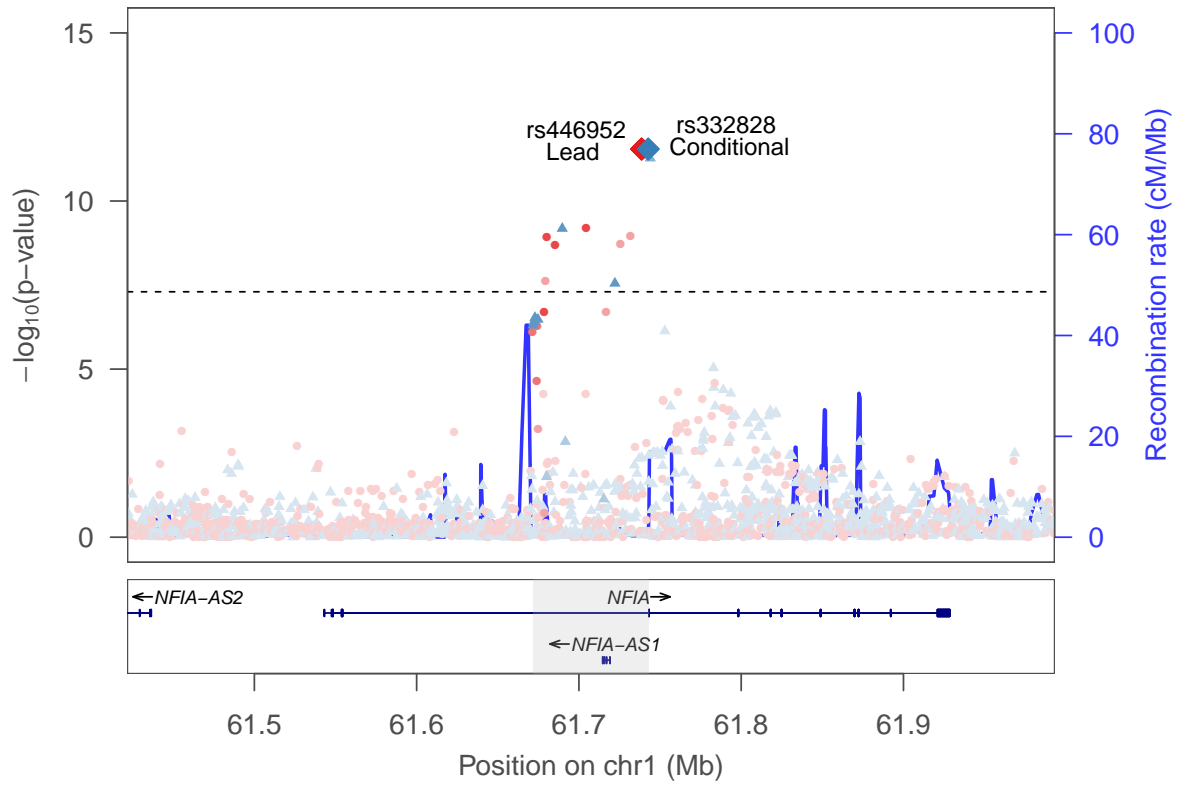

rs332828 ▲  
rs446952 ●

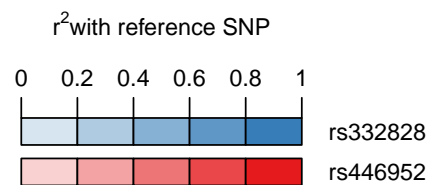



# Number of sexual partners: locus 4 [chr 1:72.513–72.748Mb]

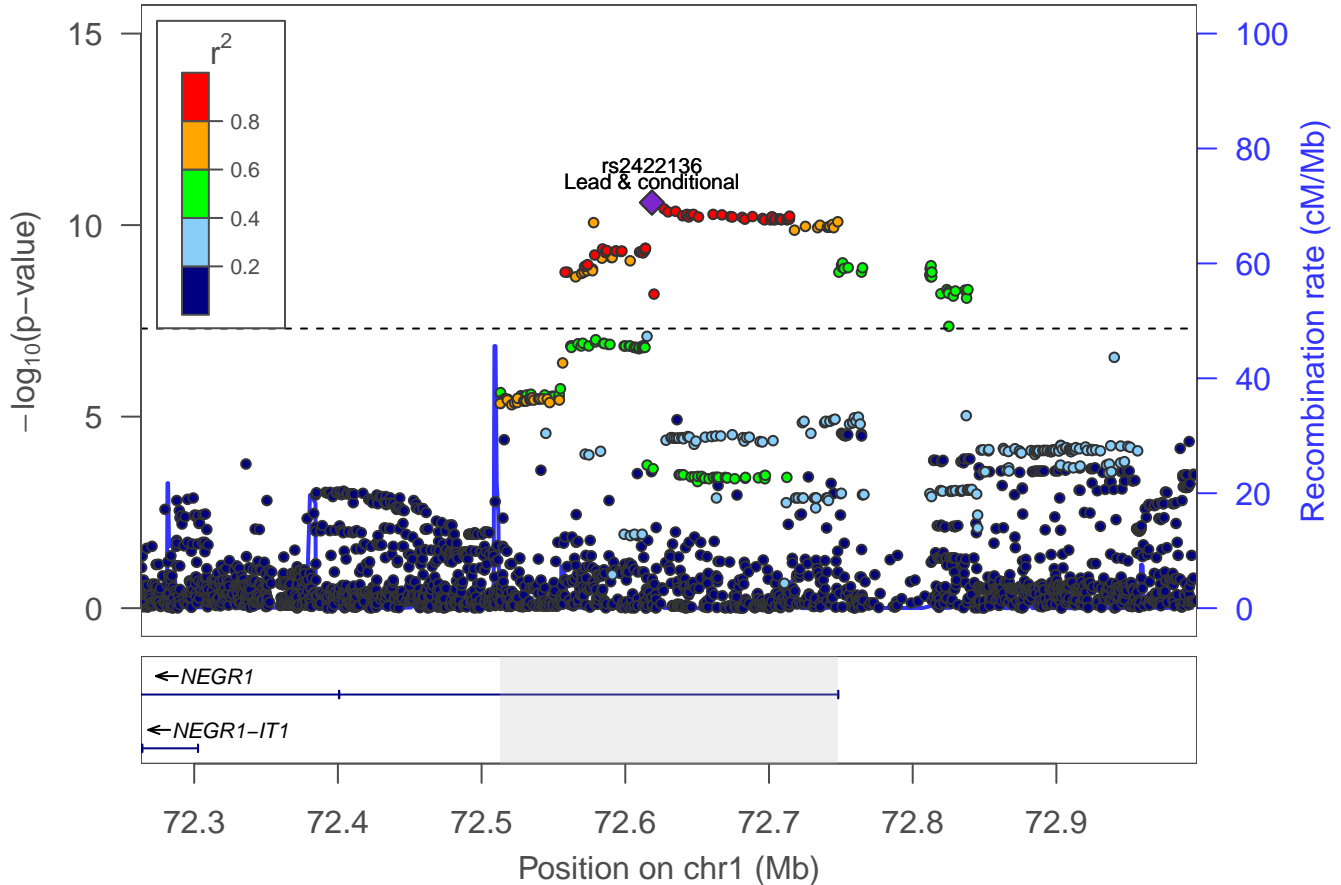

# Number of sexual partners: locus 5 [chr 1:91.190–91.215Mb]

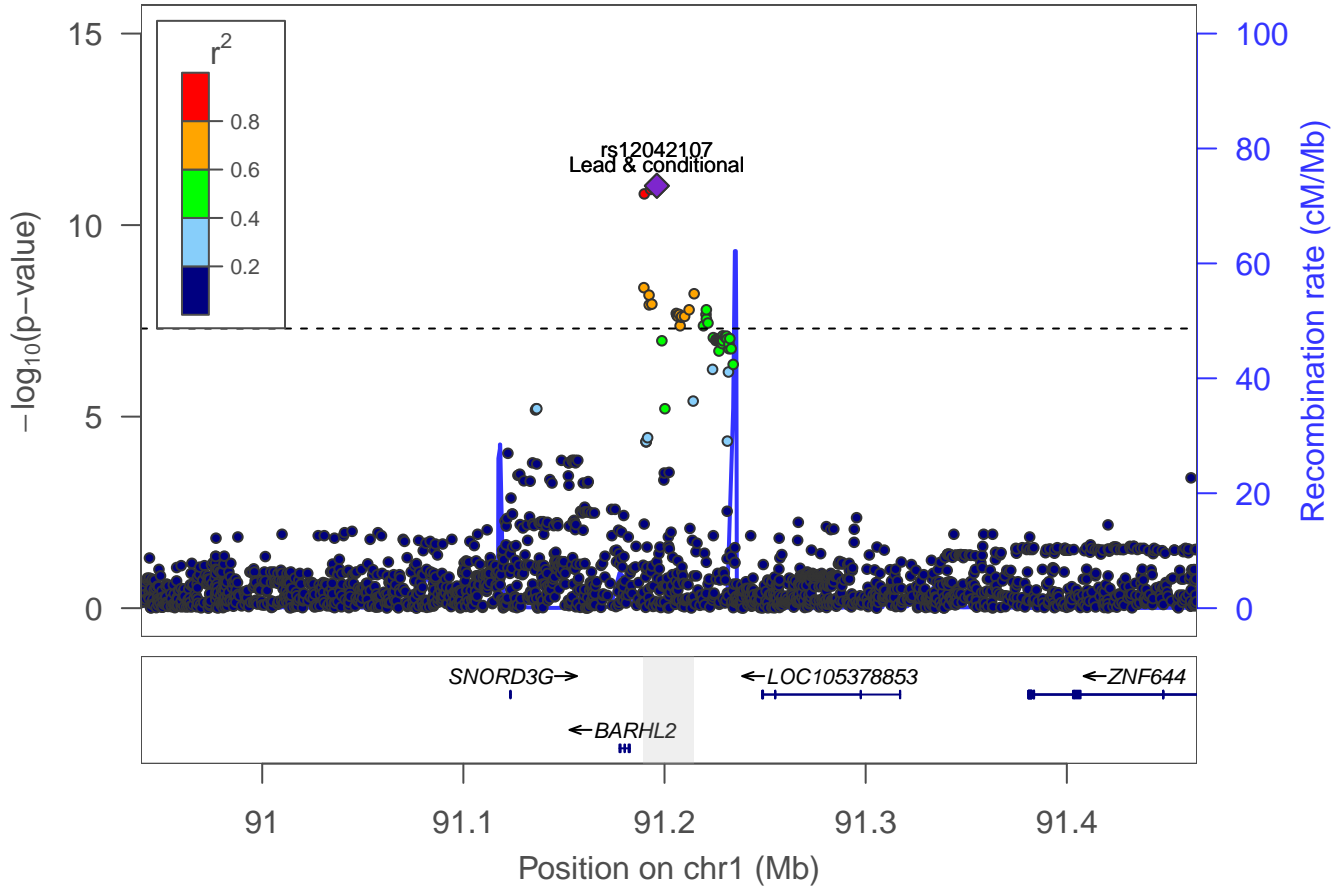

# Number of sexual partners: locus 6 [chr 1:97.114–97.284Mb]

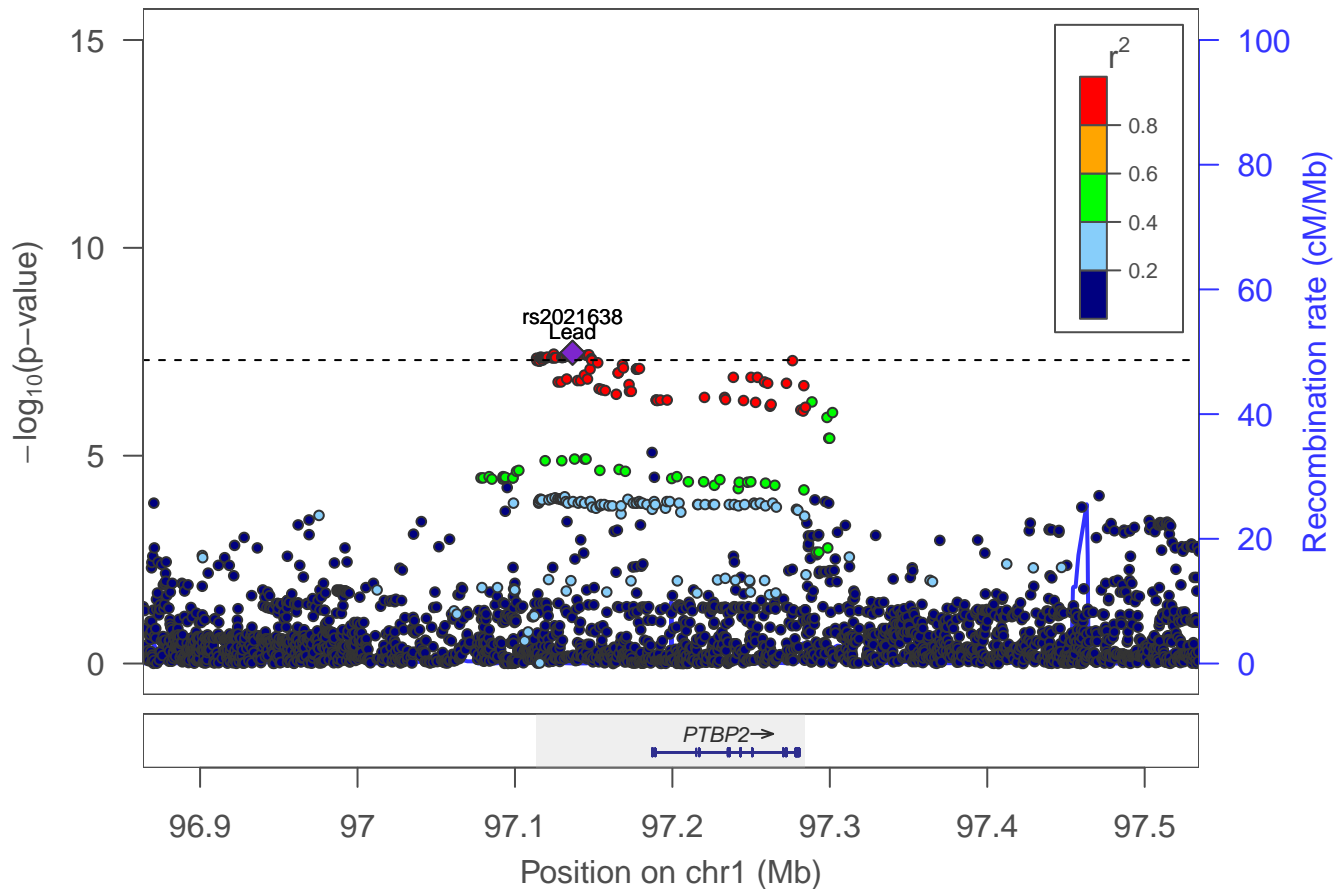

# Number of sexual partners: locus 7 [chr 1:204.947–204.969Mb]

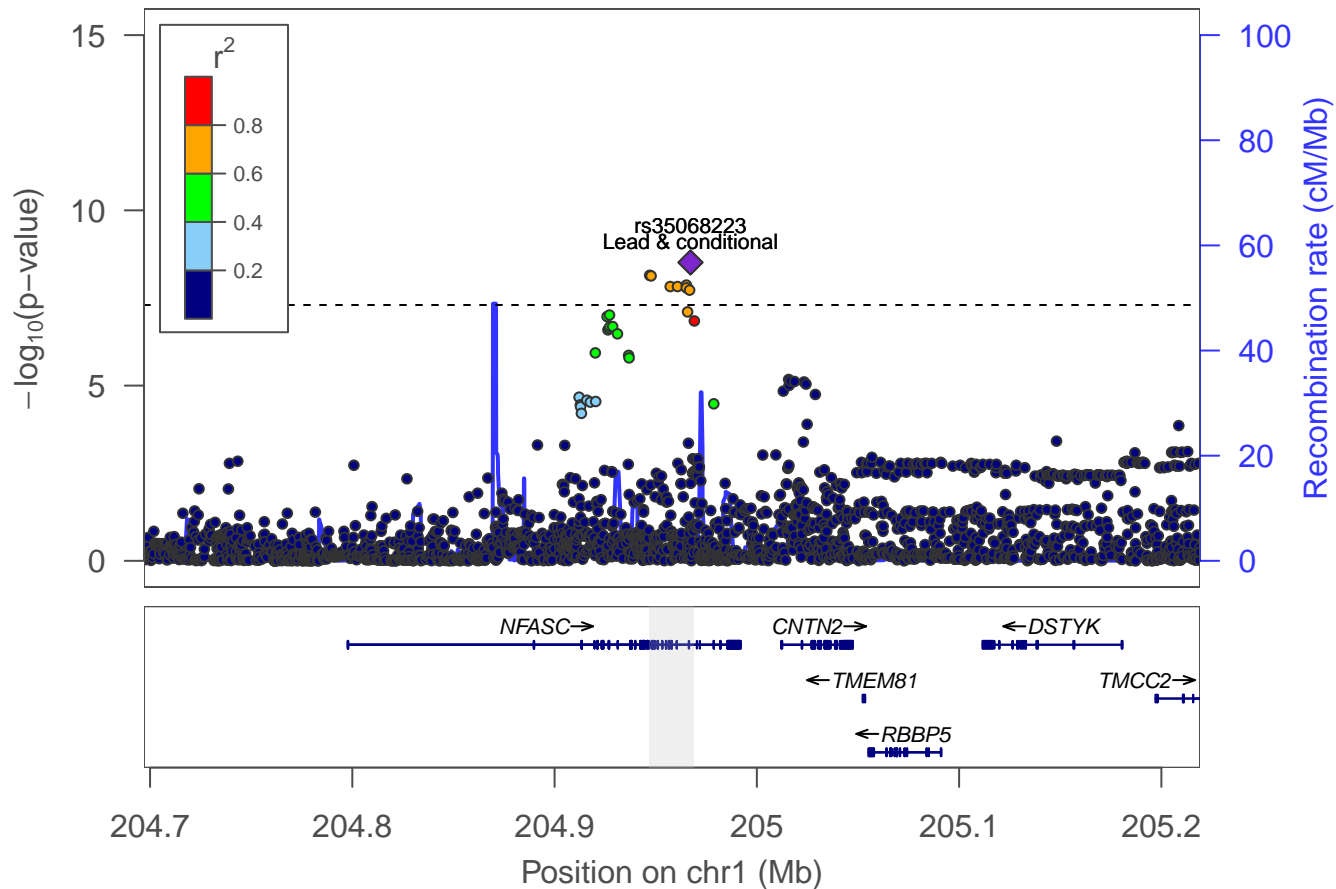

# Number of sexual partners: locus 8 [chr 2:22.549–22.606Mb]

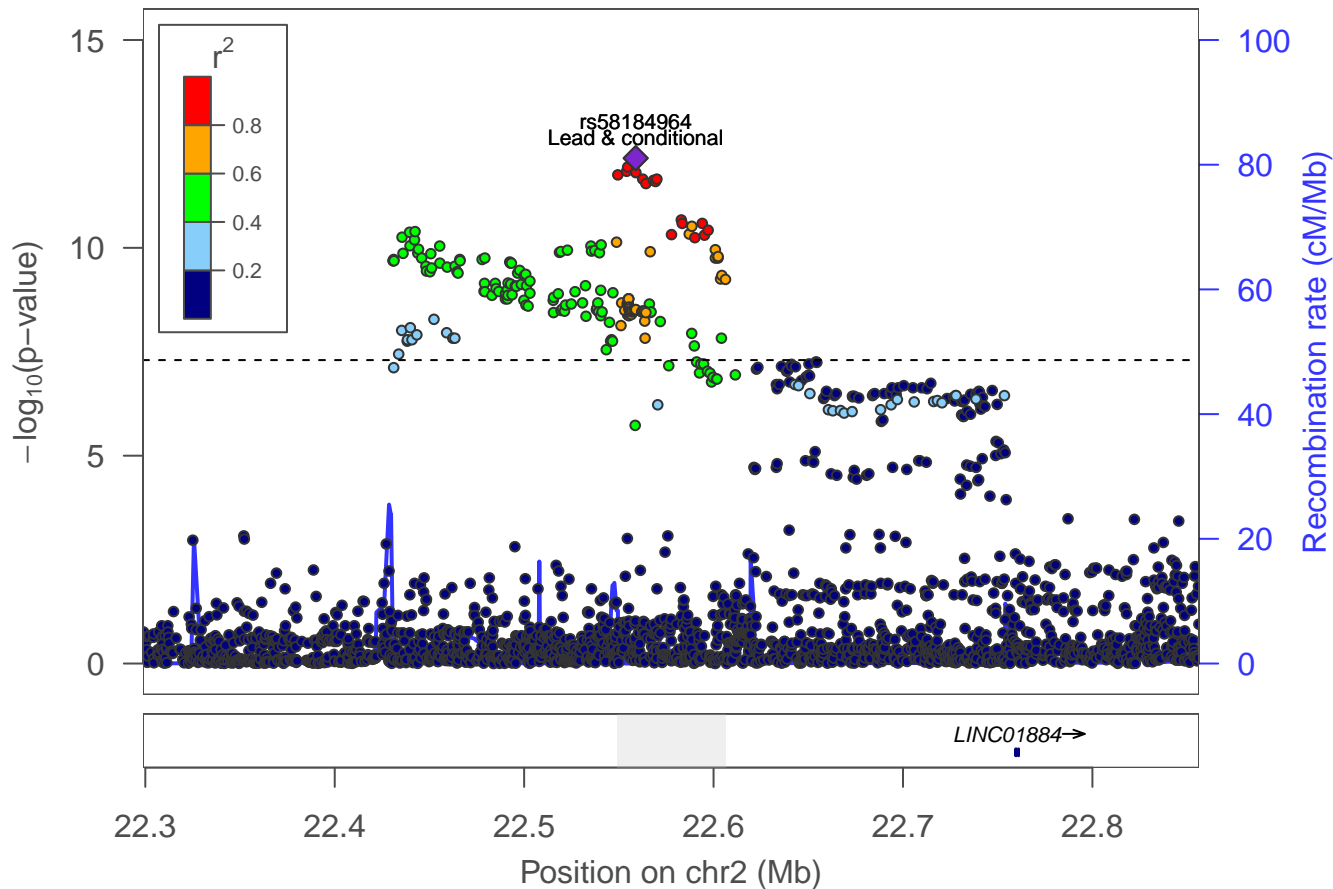

# Number of sexual partners: locus 9 [chr 2:32.497–32.860Mb]

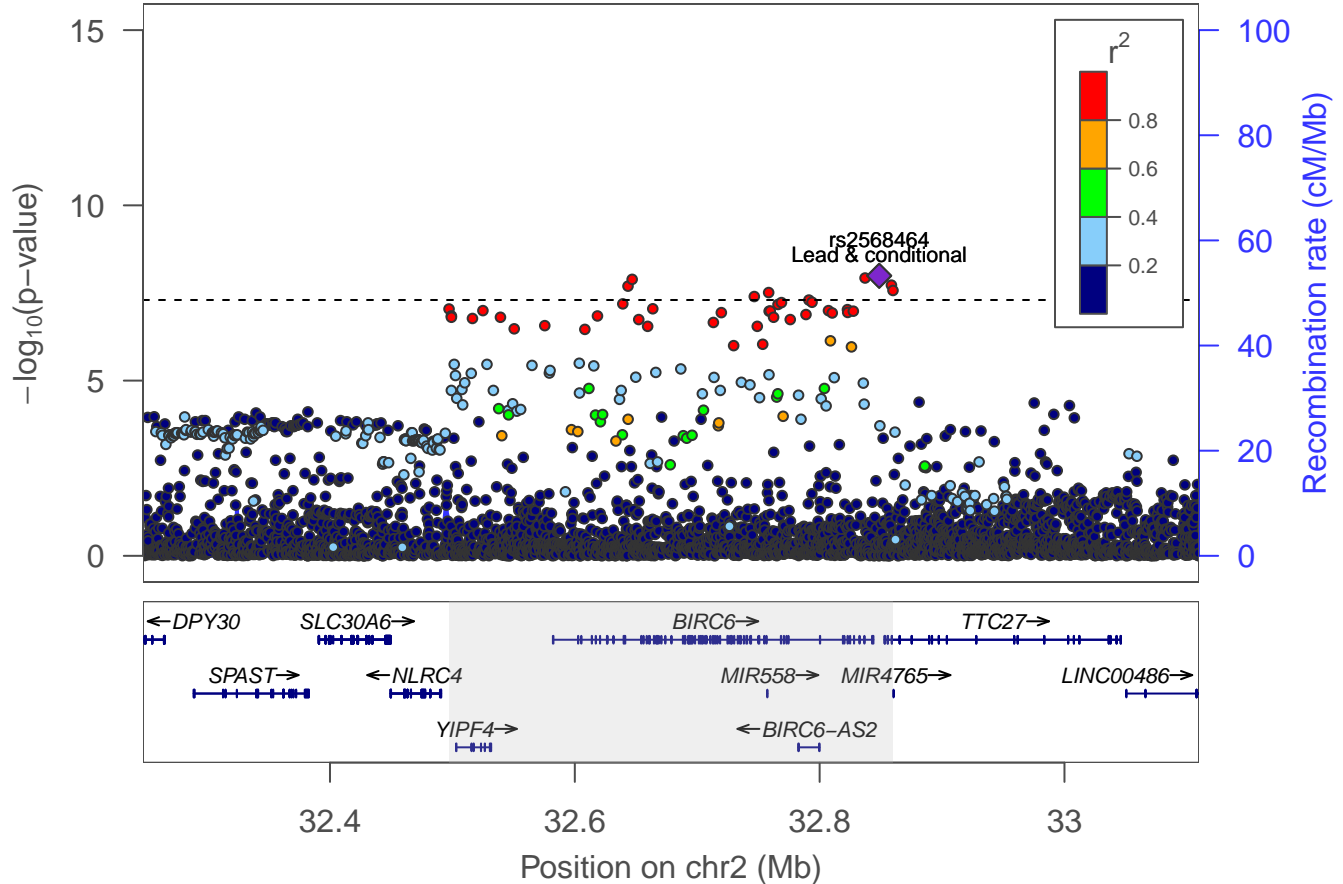

# Number of sexual partners: locus 10 [chr 2:44.271–44.360Mb]

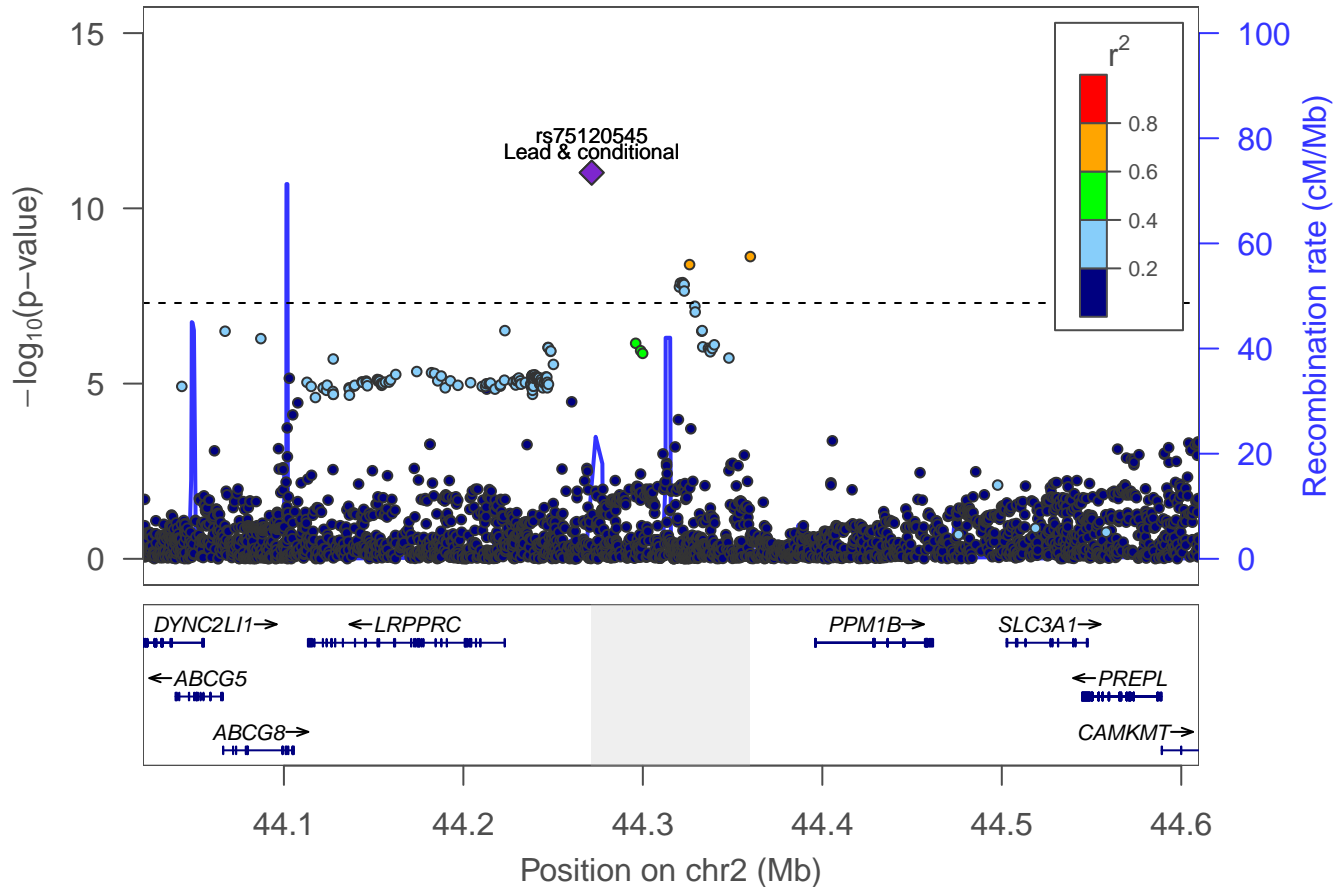

# Number of sexual partners: Locus 11 [chr 2: 60.115–60.793Mb]

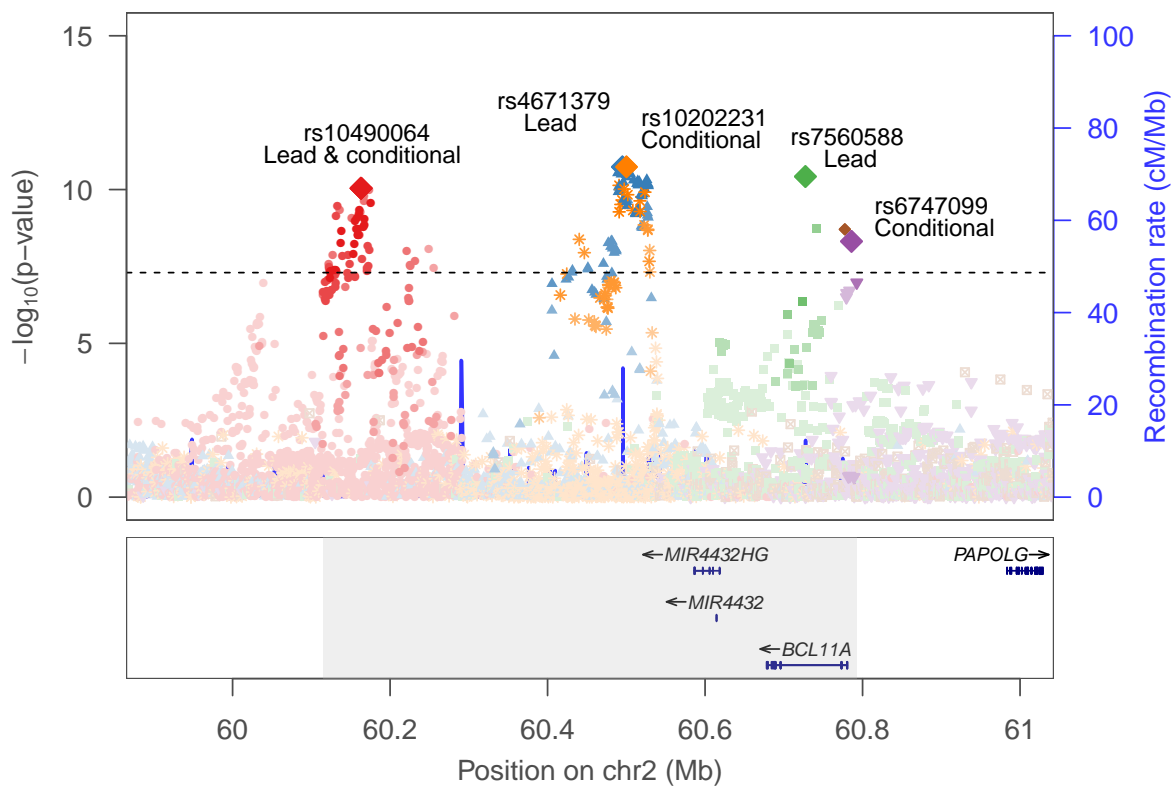

rs6747099   
 rs10202231   
 rs12328348   
 rs7560588   
 rs4671379   
 rs10490064 

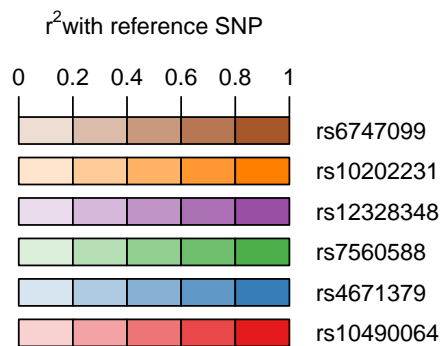



# Number of sexual partners: locus 12 [chr 2:62.711–62.780Mb]

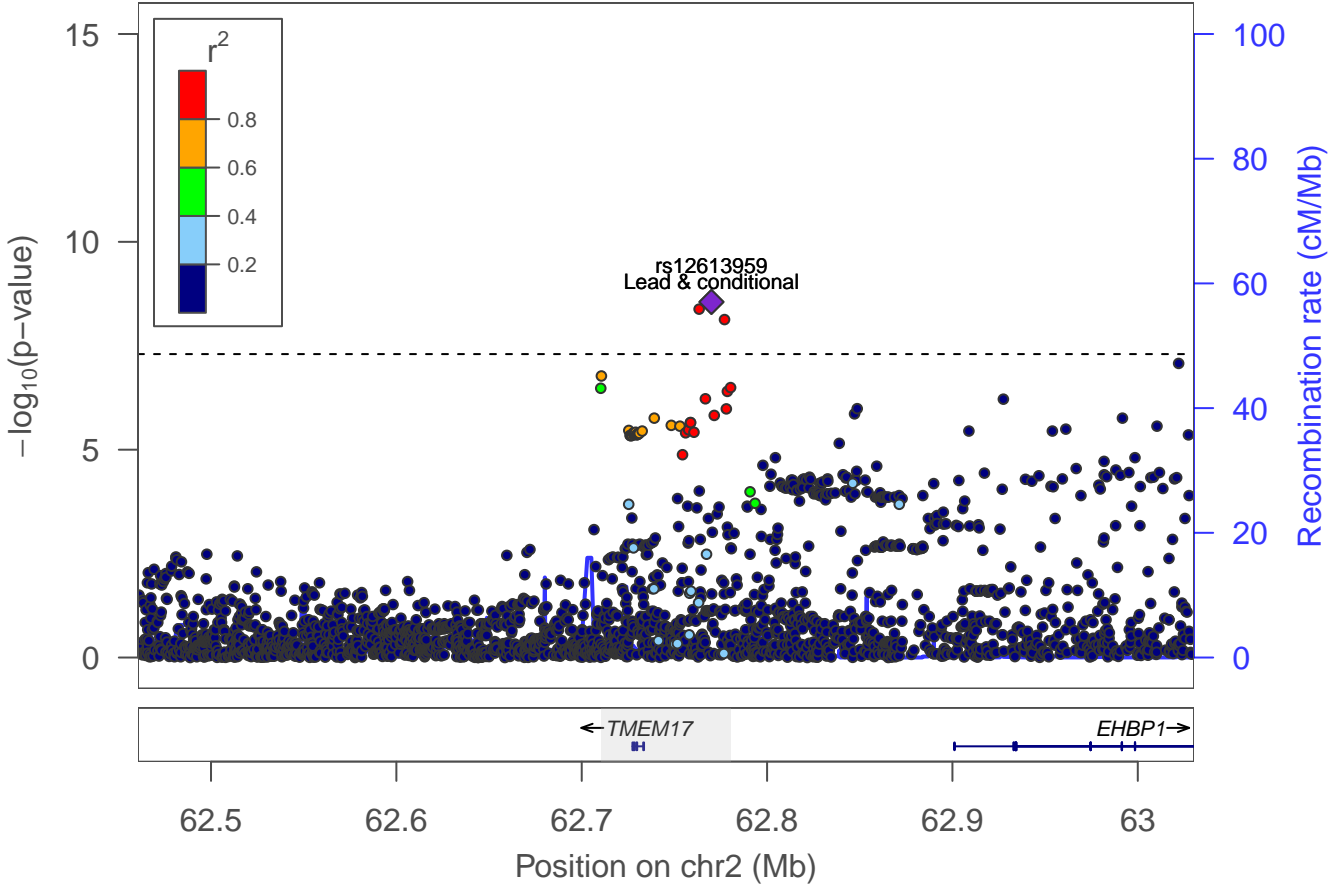

# Number of sexual partners: locus 13 [chr 2:63.342–63.624Mb]

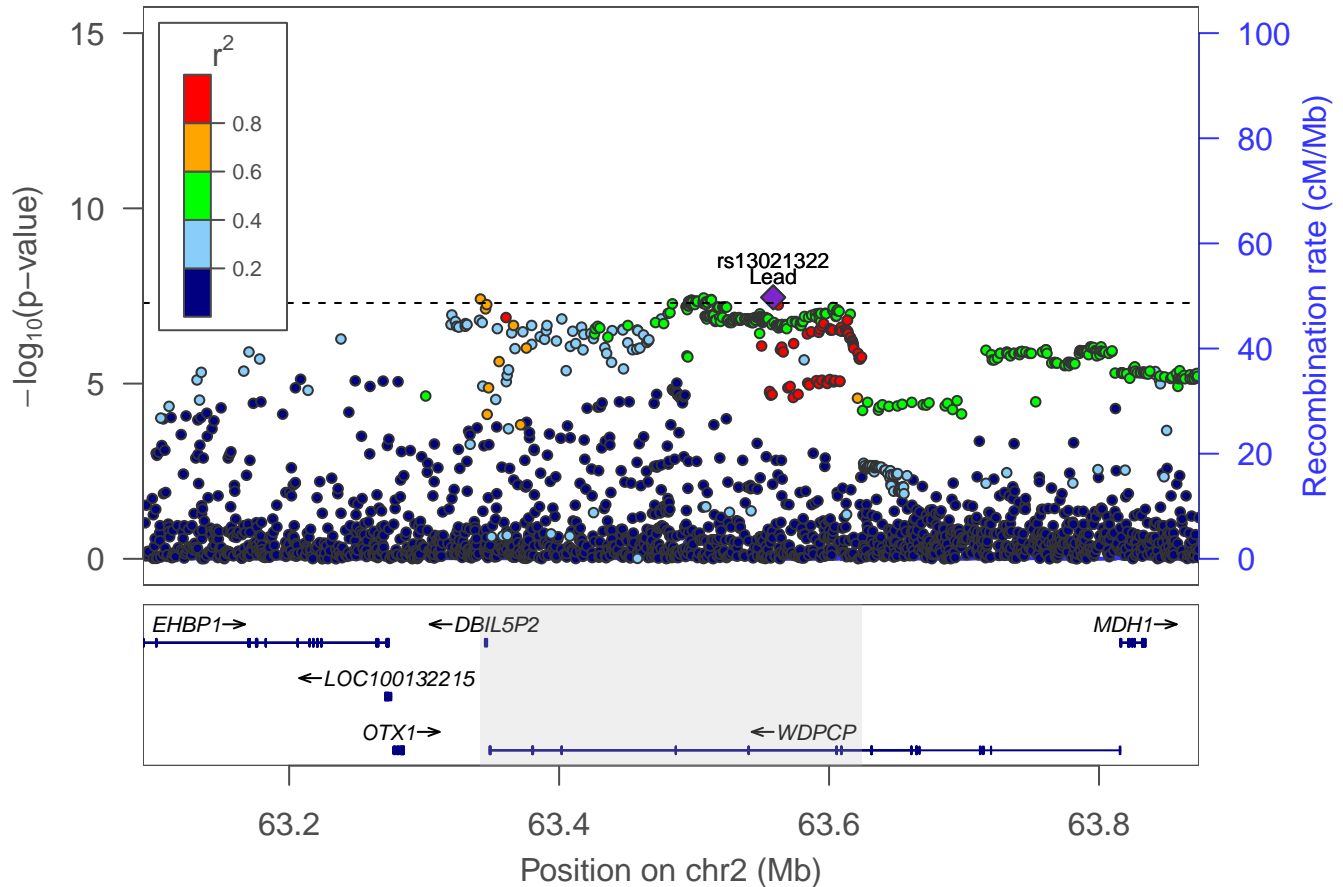

# Number of sexual partners: locus 14 [chr 2:77.169–77.335Mb]

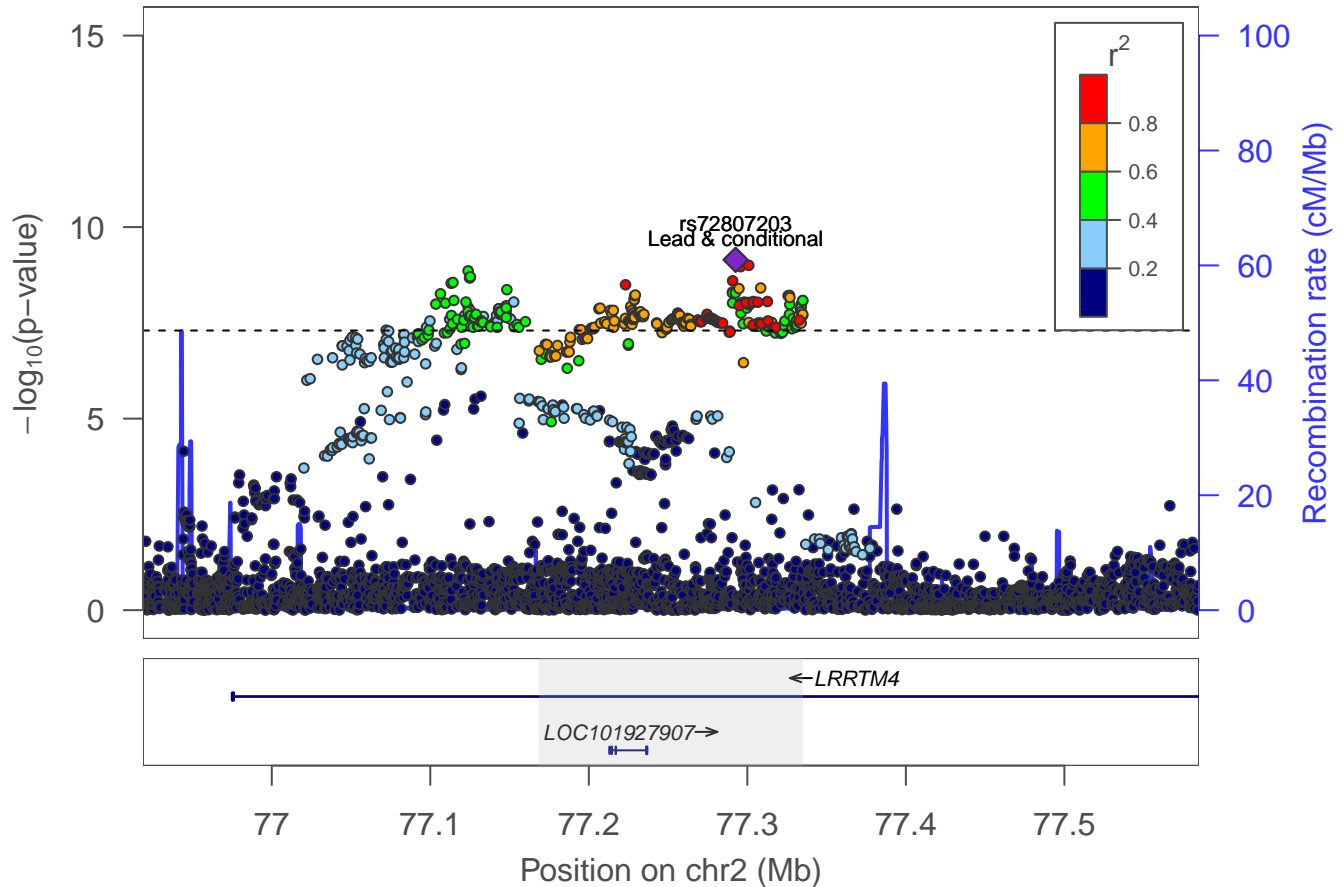

# Number of sexual partners: locus 15 [chr 2:86.664–86.860Mb]

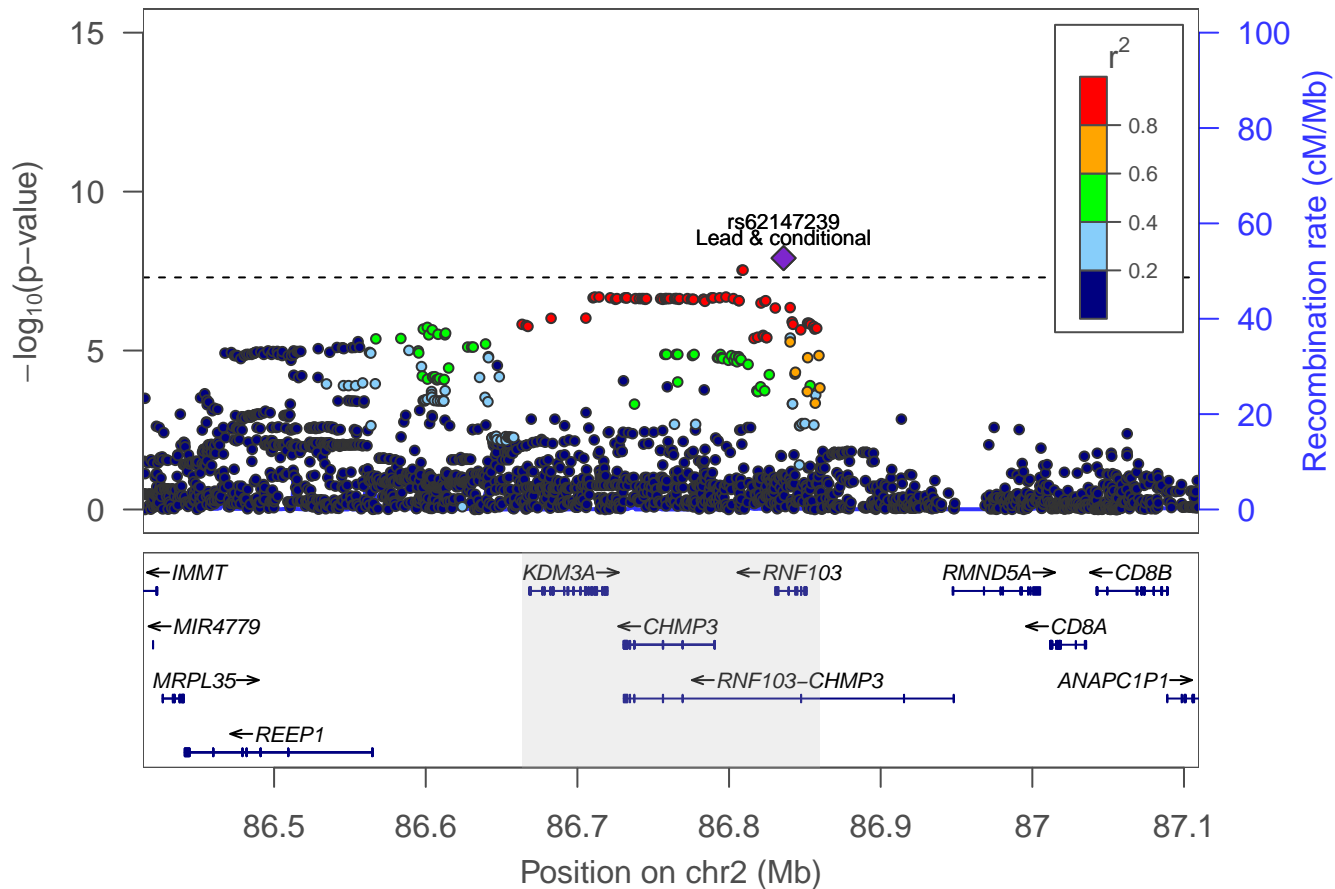

# Number of sexual partners: locus 16 [chr 2:104.057–104.413Mb]

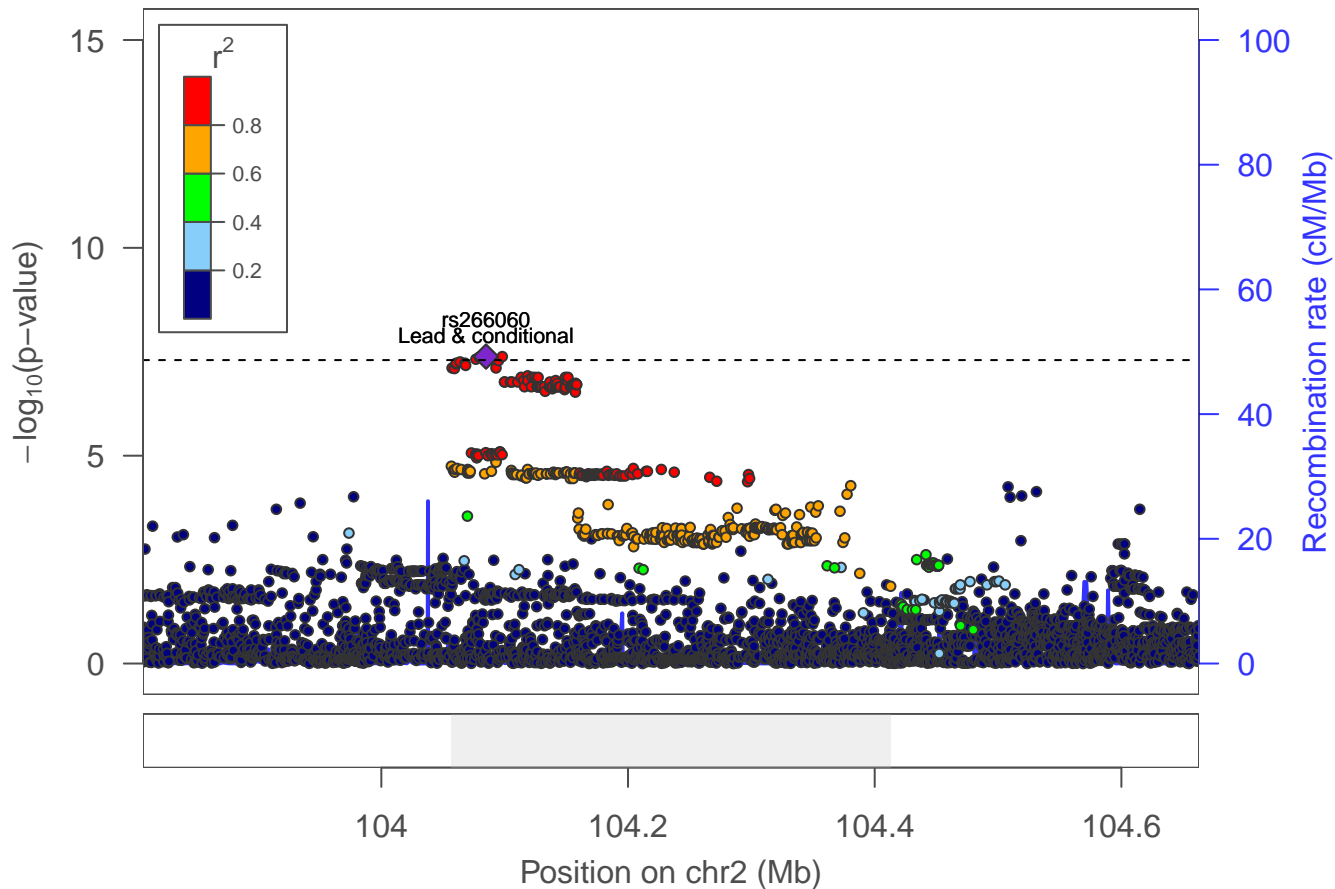

# Number of sexual partners: locus 17 [chr 2:140.189–140.475Mb]

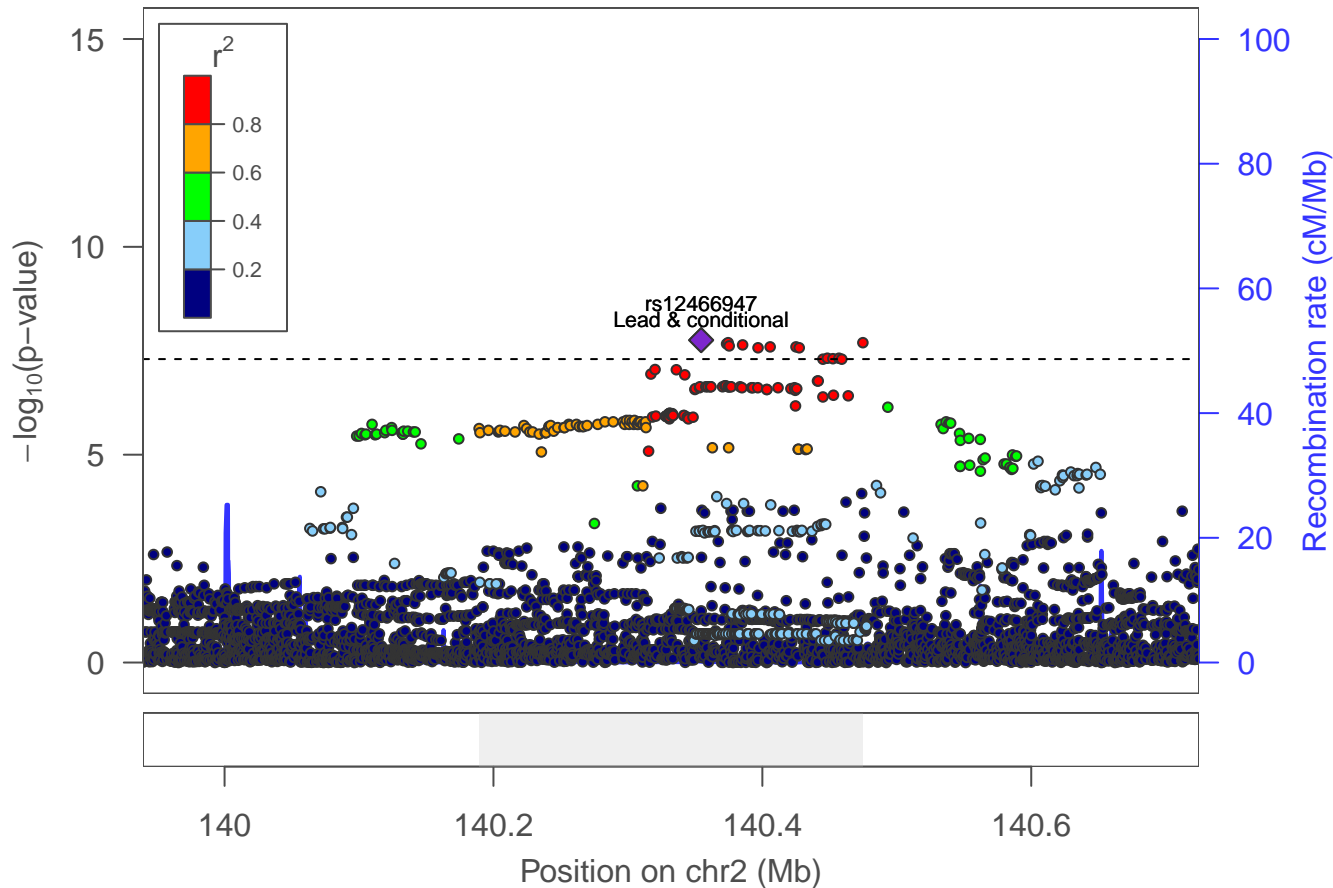

# Number of sexual partners: locus 18 [chr 2:164.734–164.928Mb]

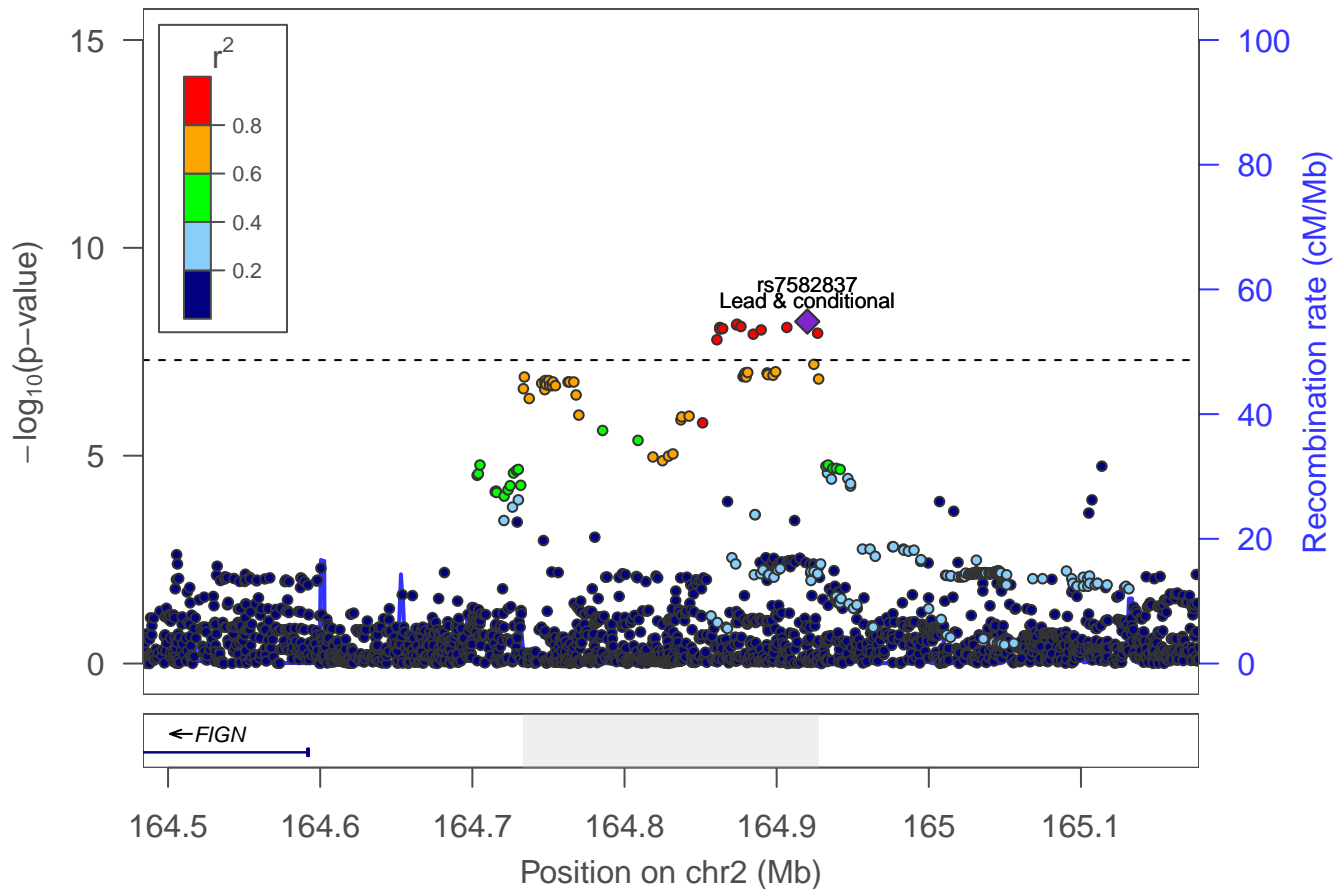

# Number of sexual partners: locus 19 [chr 2:181.986–182.096Mb]

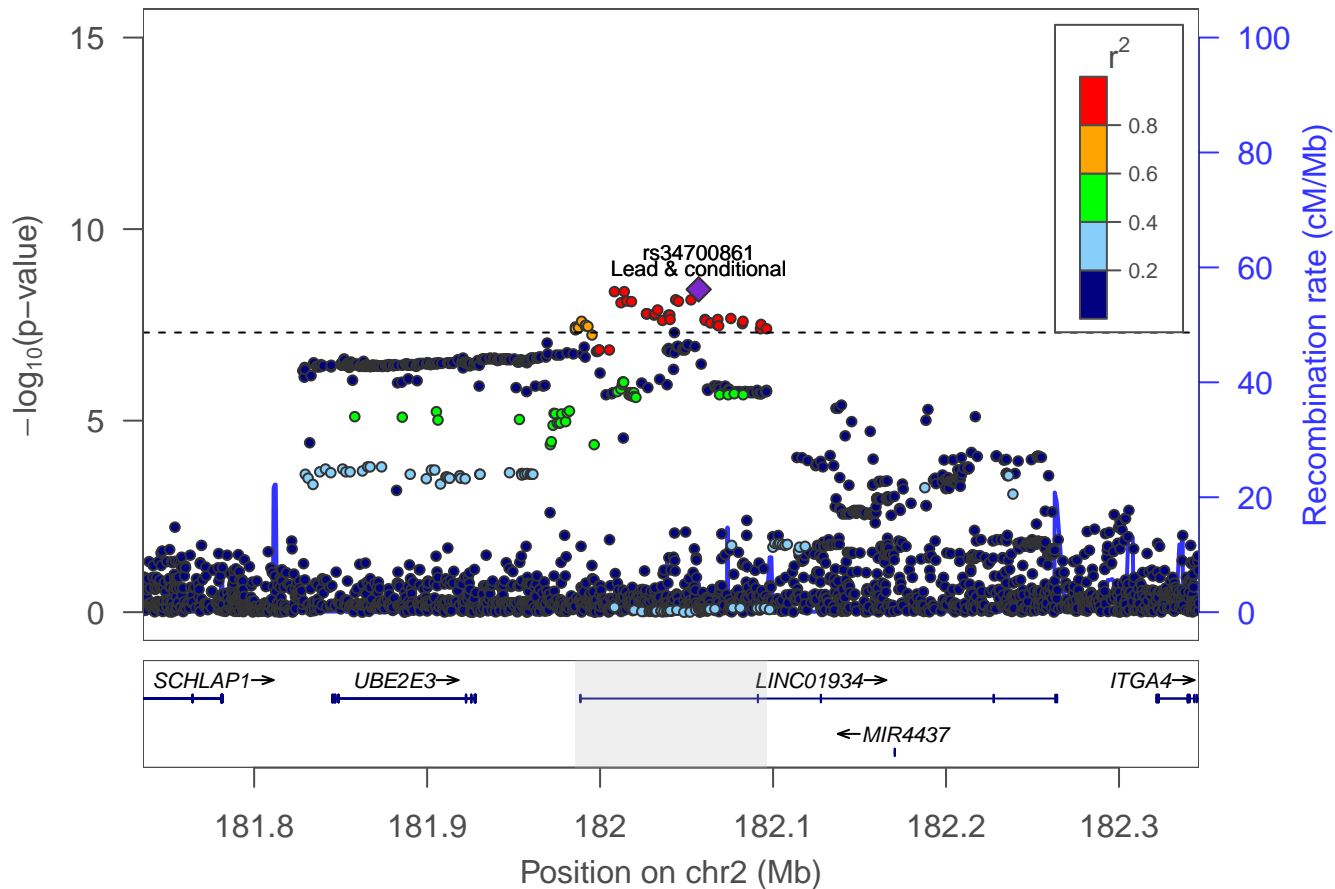



# Number of sexual partners: locus 20 [chr 3:71.026–71.064Mb]

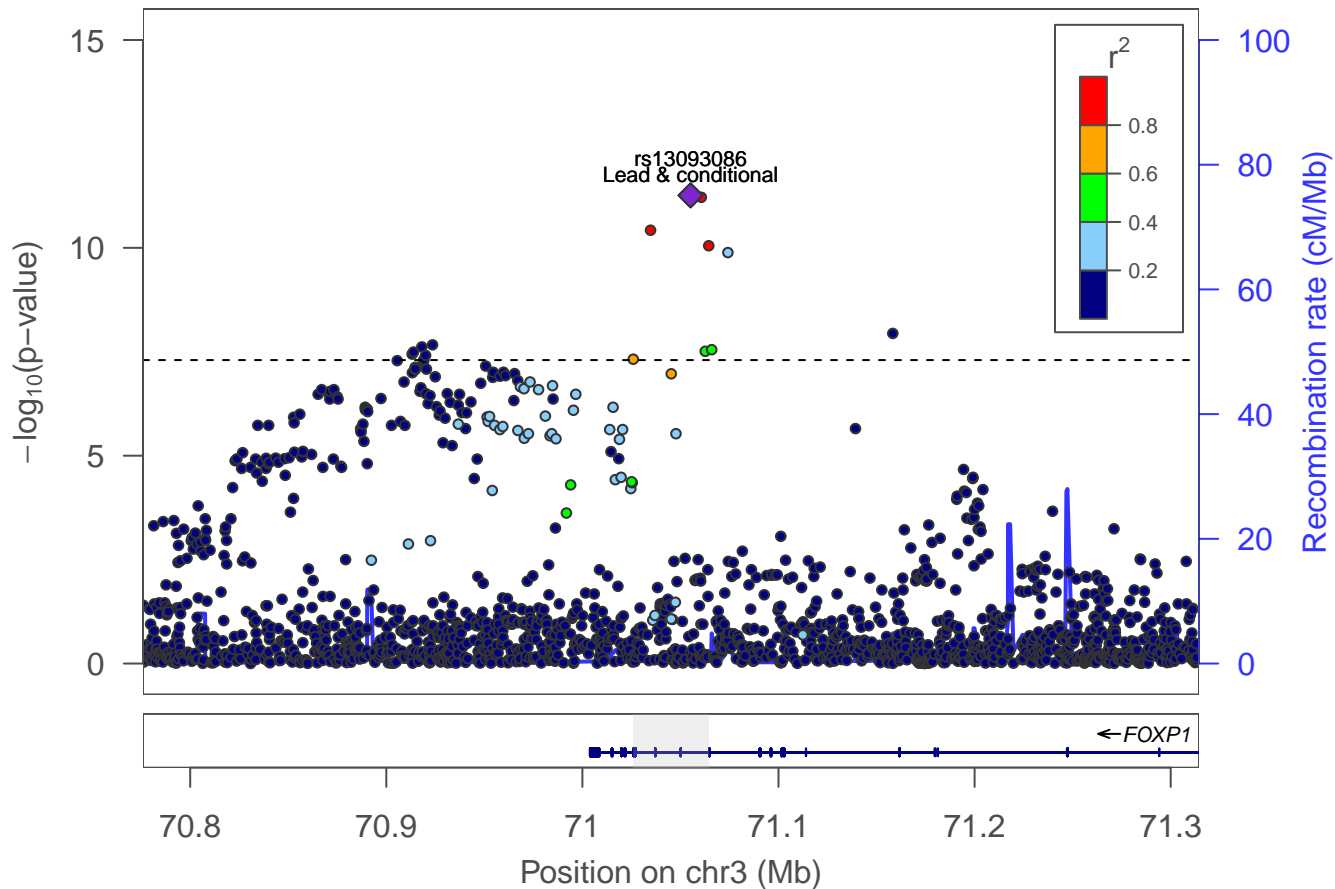

# Number of sexual partners: locus 21 [chr 3:83.871–84.043Mb]

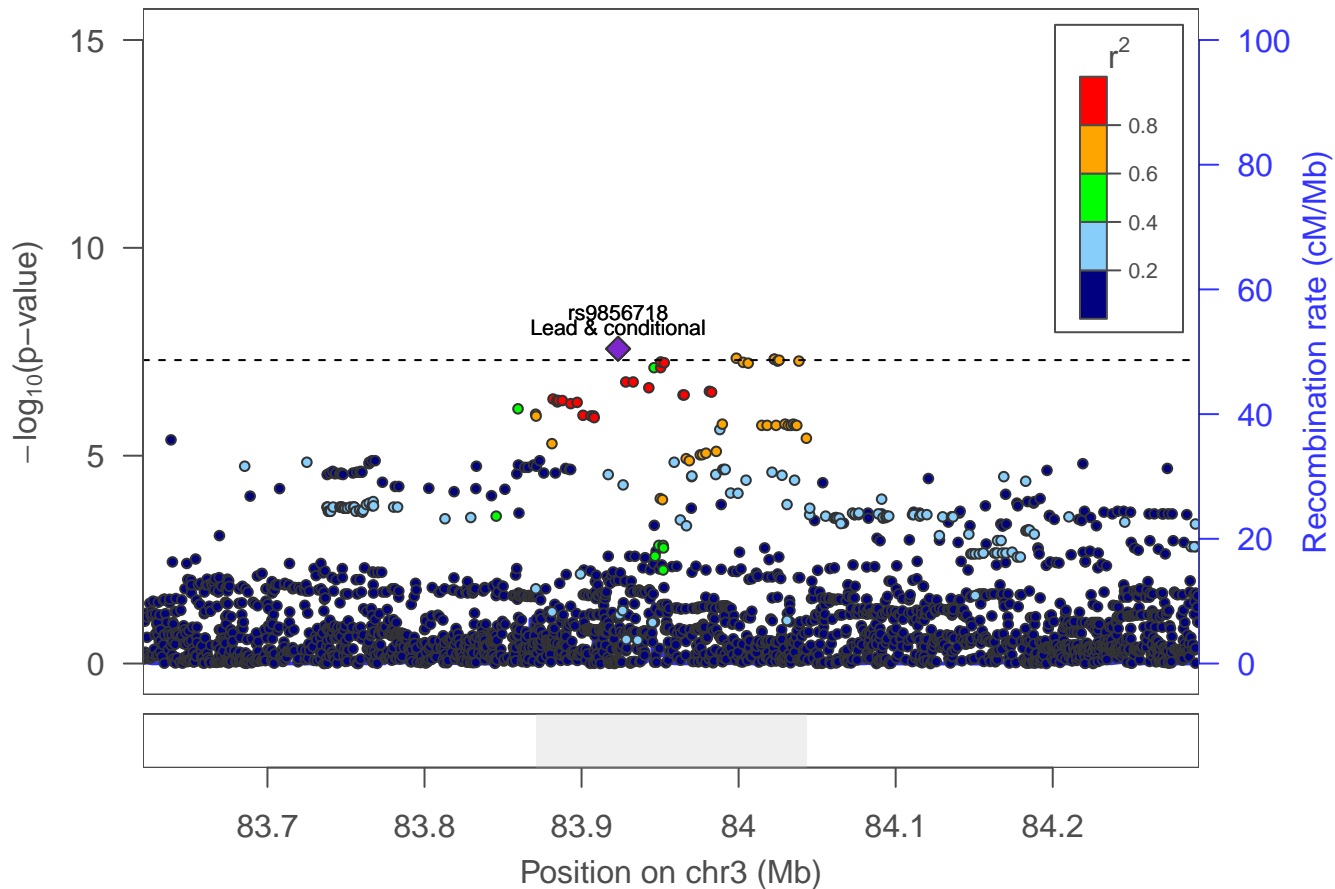

# Number of sexual partners: locus 22 [chr 3:85.397–85.651Mb]

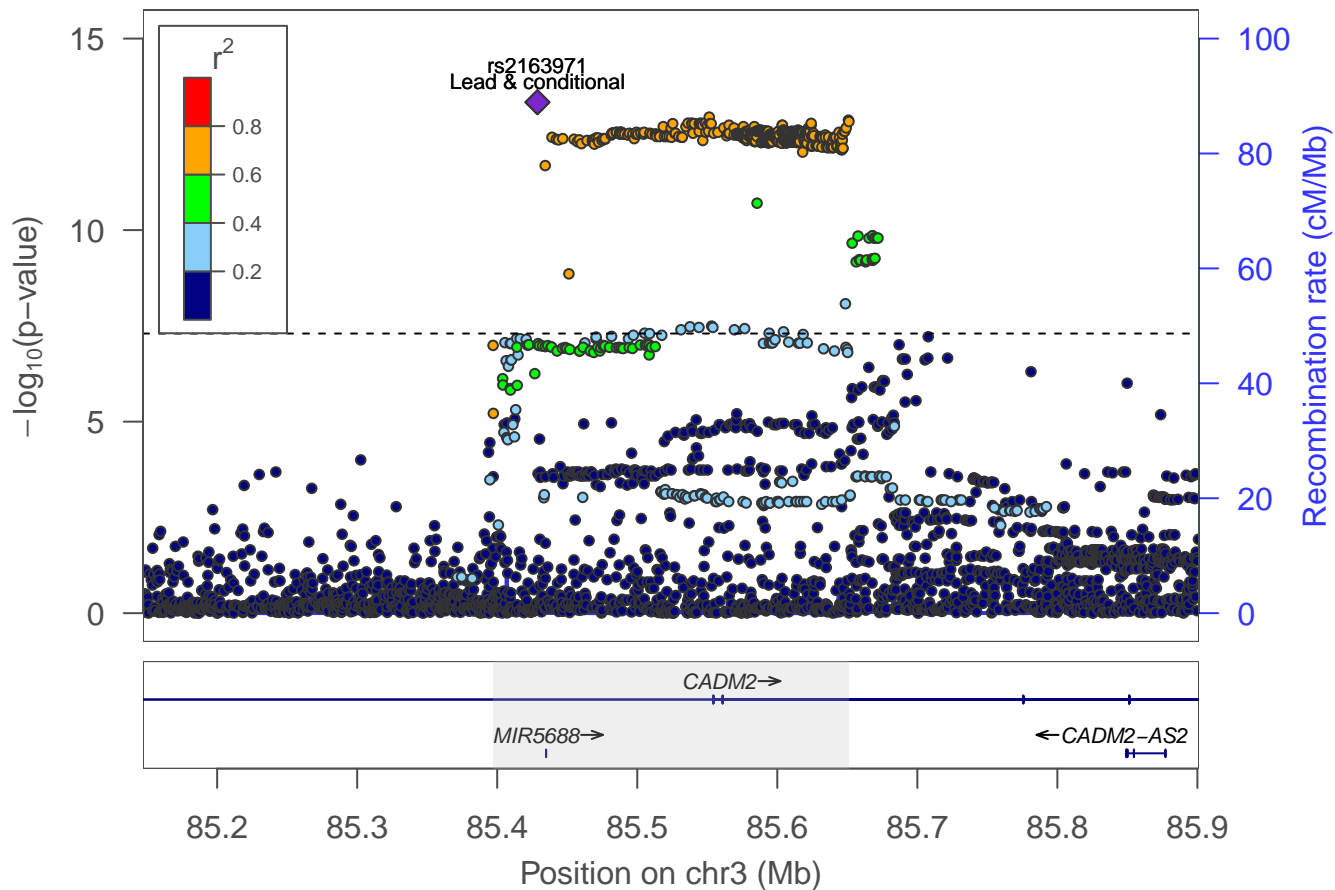

# Number of sexual partners: Locus 23 [chr 3: 86.169–86.282Mb]

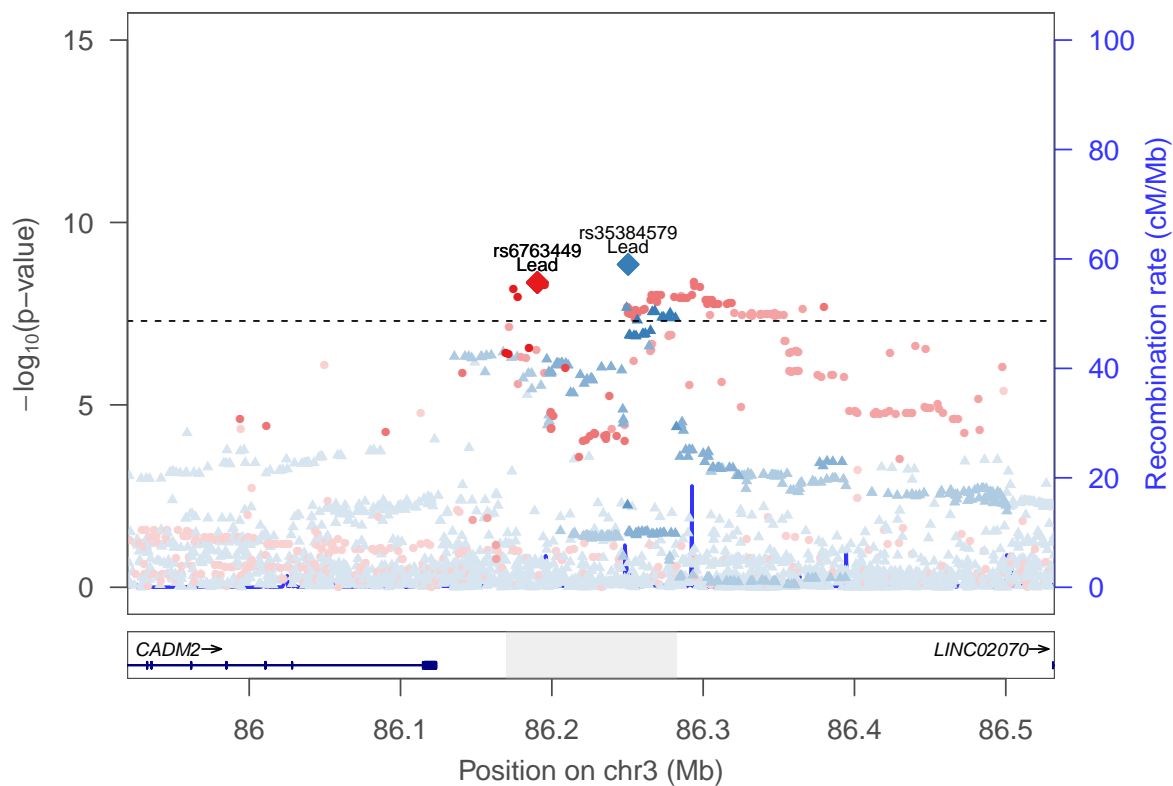

rs35384579 ▲  
rs6763449 ●

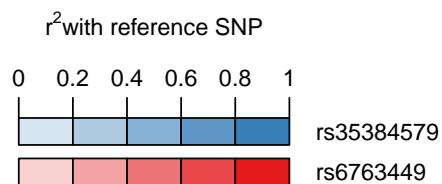

# Number of sexual partners: locus 24 [chr 3:94.130–94.251Mb]

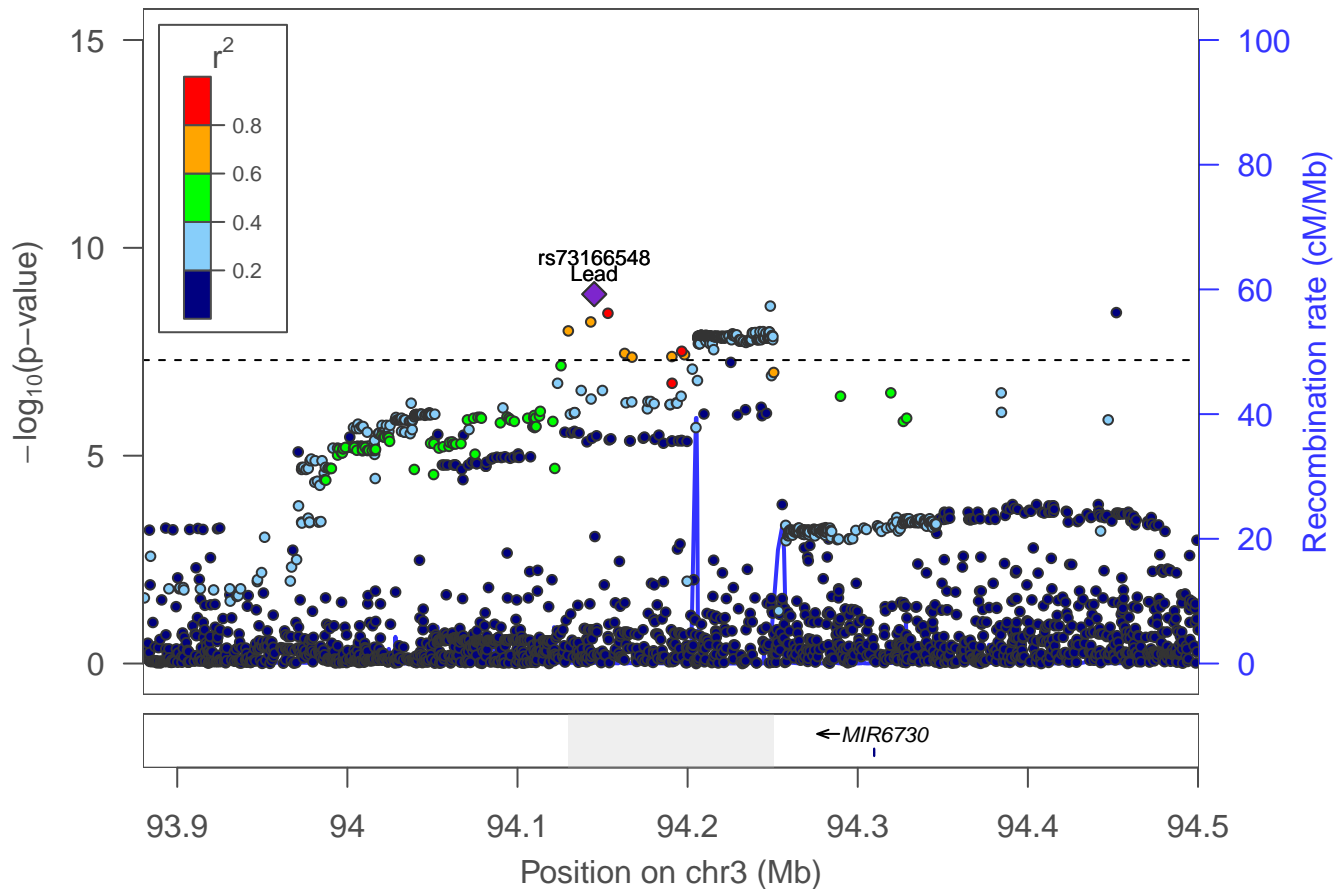

# Number of sexual partners: locus 25 [chr 3:95.083–95.220Mb]

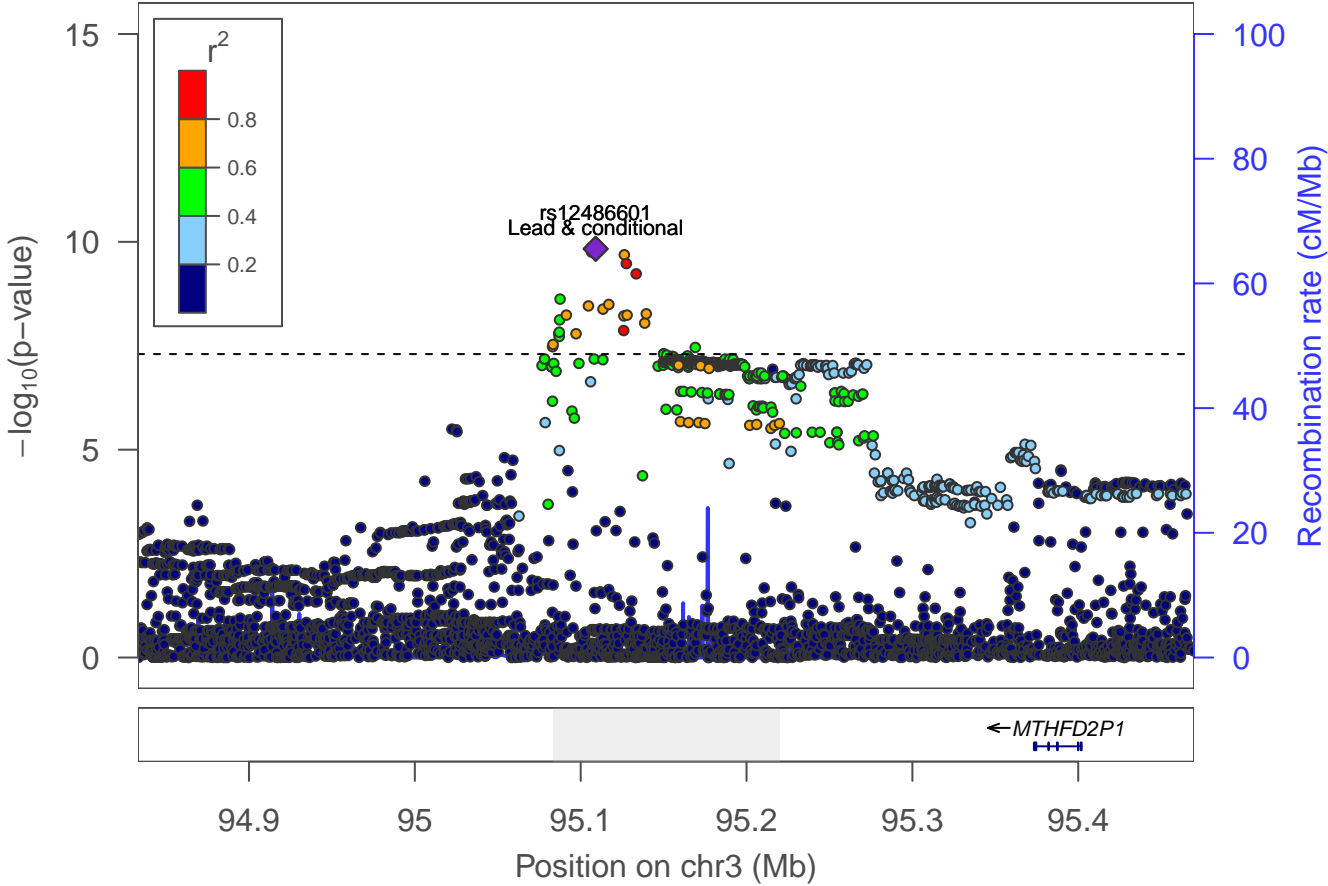

# Number of sexual partners: locus 26 [chr 3:117.517–117.822Mb]

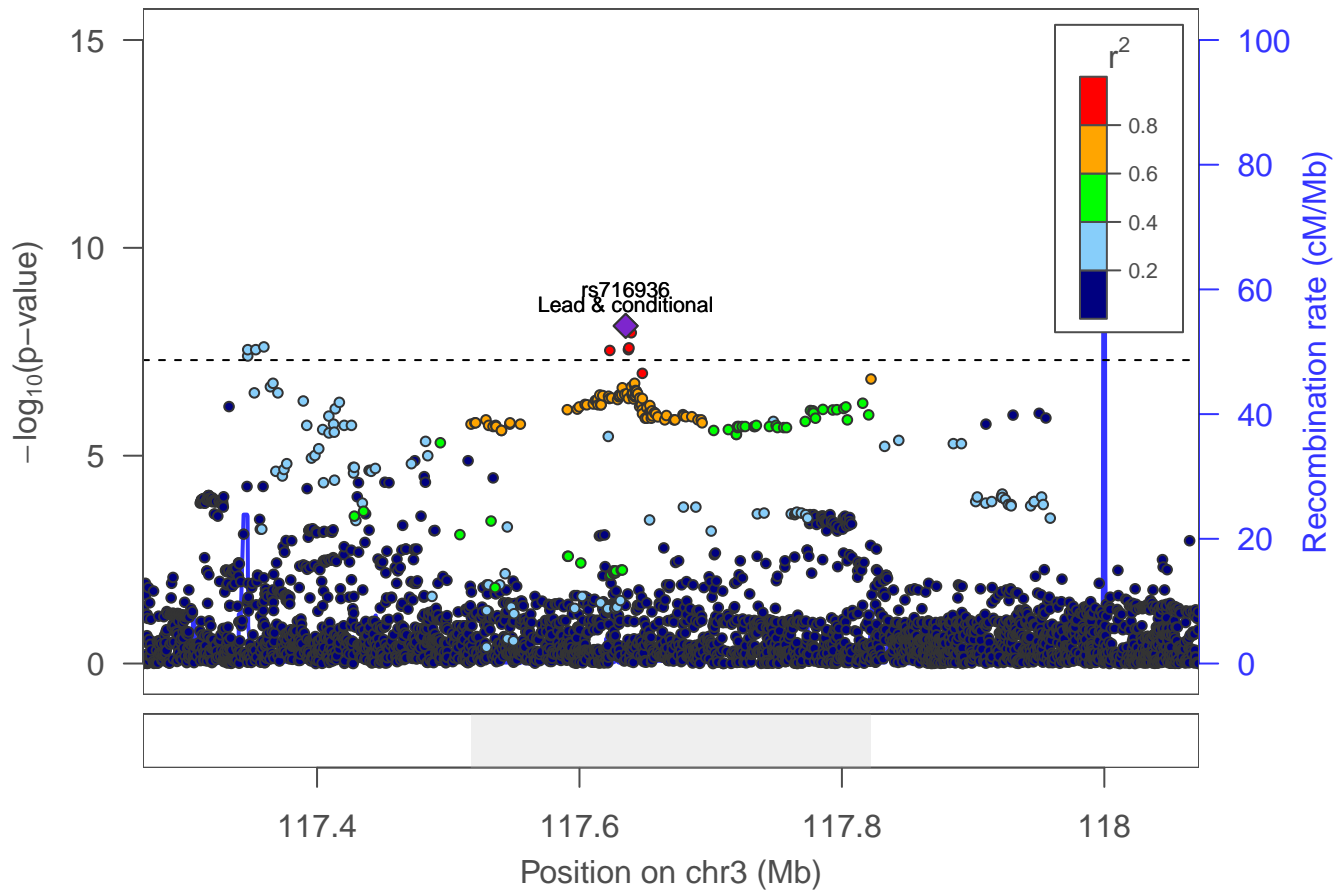

# Number of sexual partners: locus 27 [chr 3:127.166–127.190Mb]

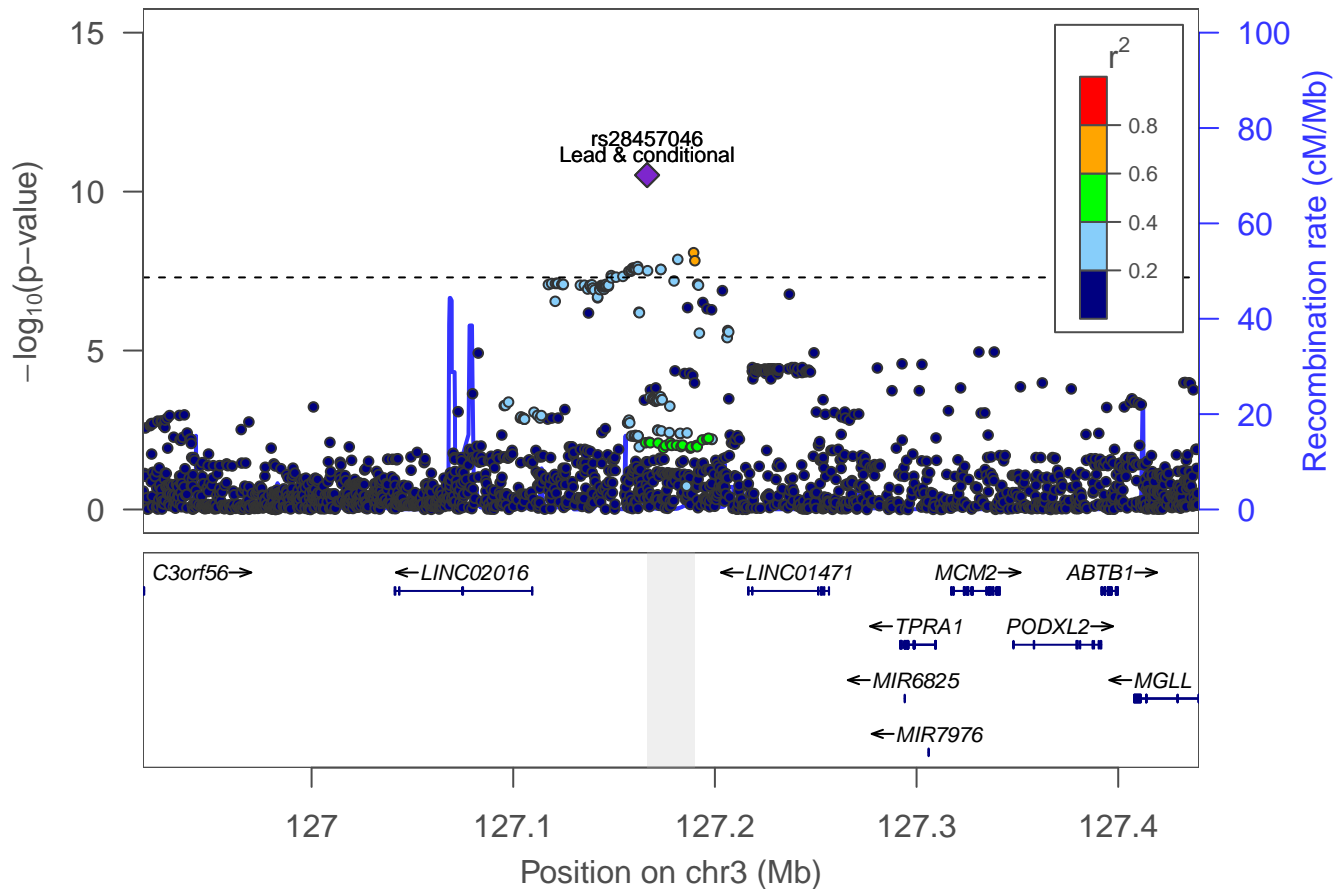



# Number of sexual partners: Locus 28 [chr 3: 147.094–147.141Mb]

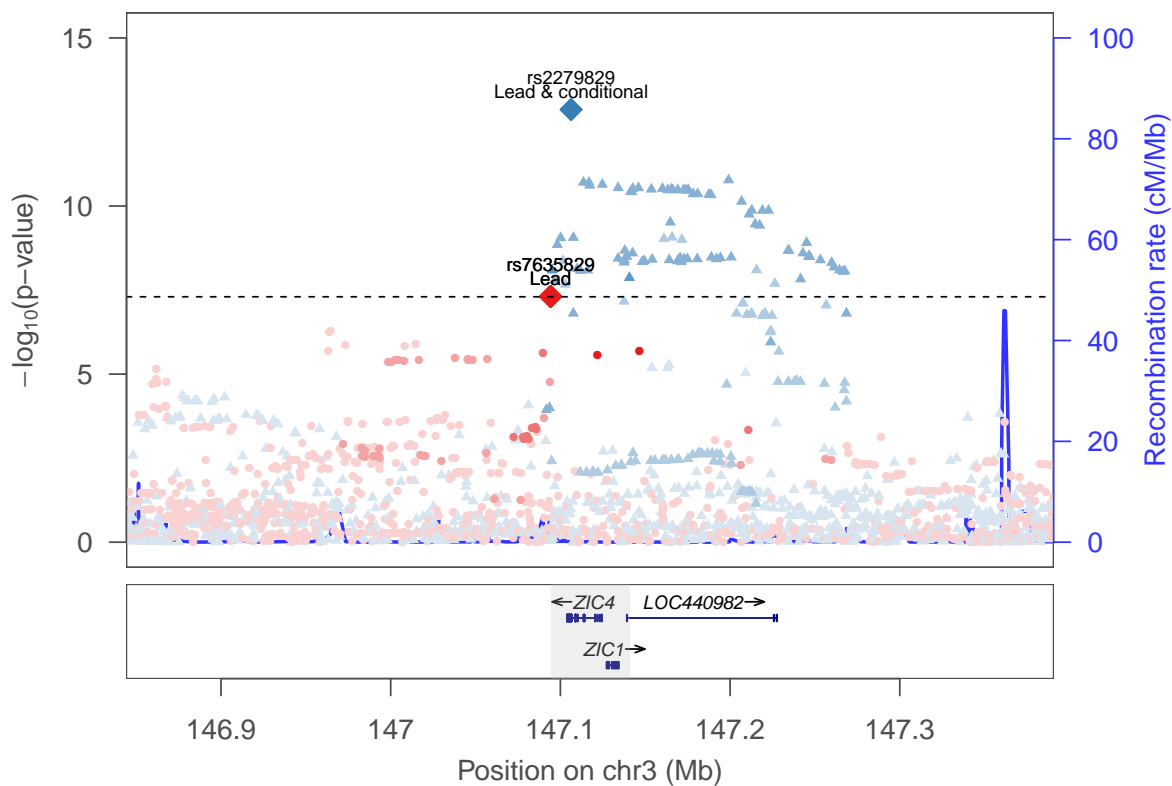

rs2279829 ▲  
 rs7635829 ●

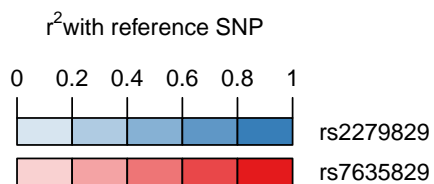

# Number of sexual partners: locus 29 [chr 3:160.815–161.125Mb]

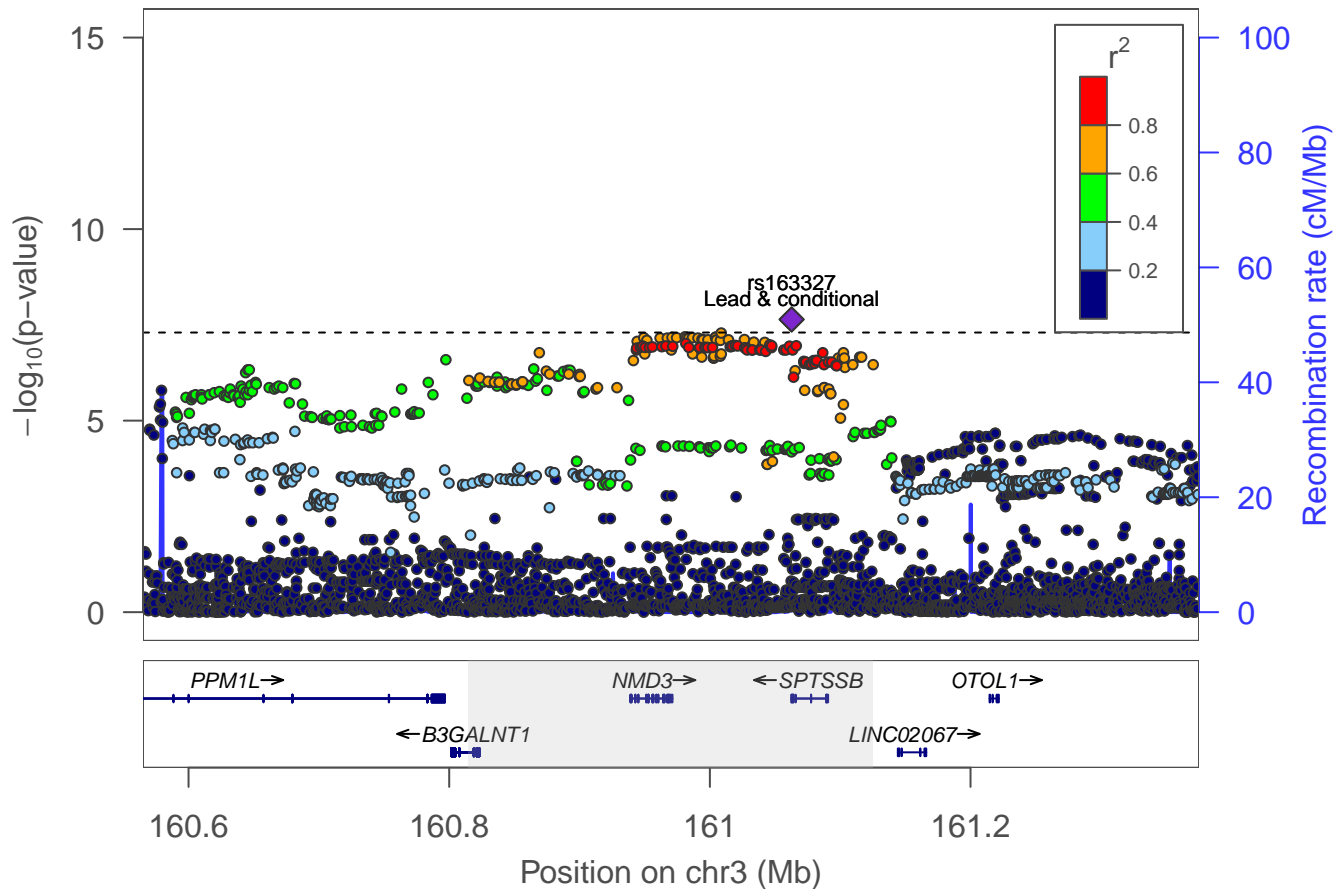

# Number of sexual partners: locus 30 [chr 3:174.214–174.241Mb]

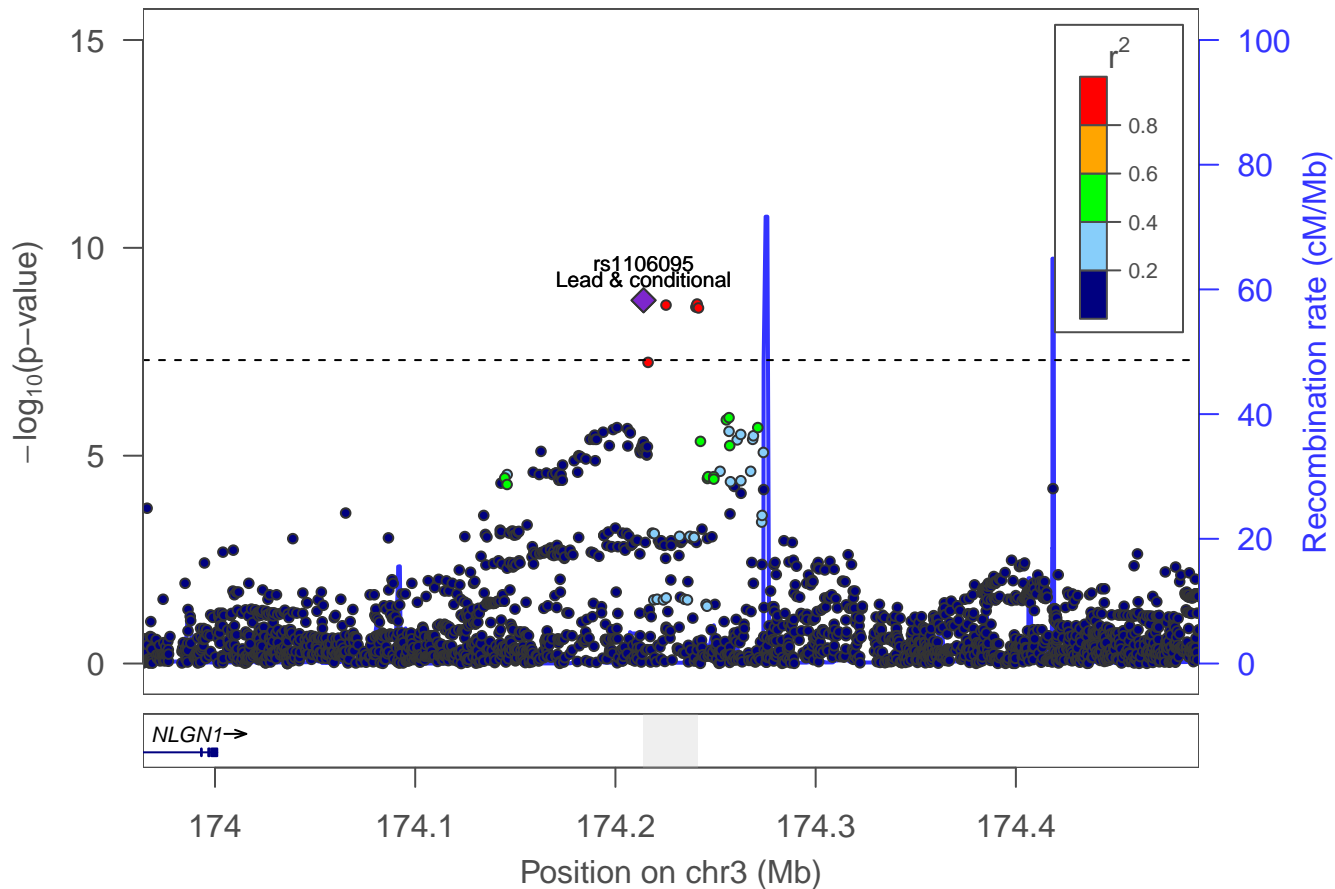

# Number of sexual partners: locus 31 [chr 4:16.817–16.849Mb]

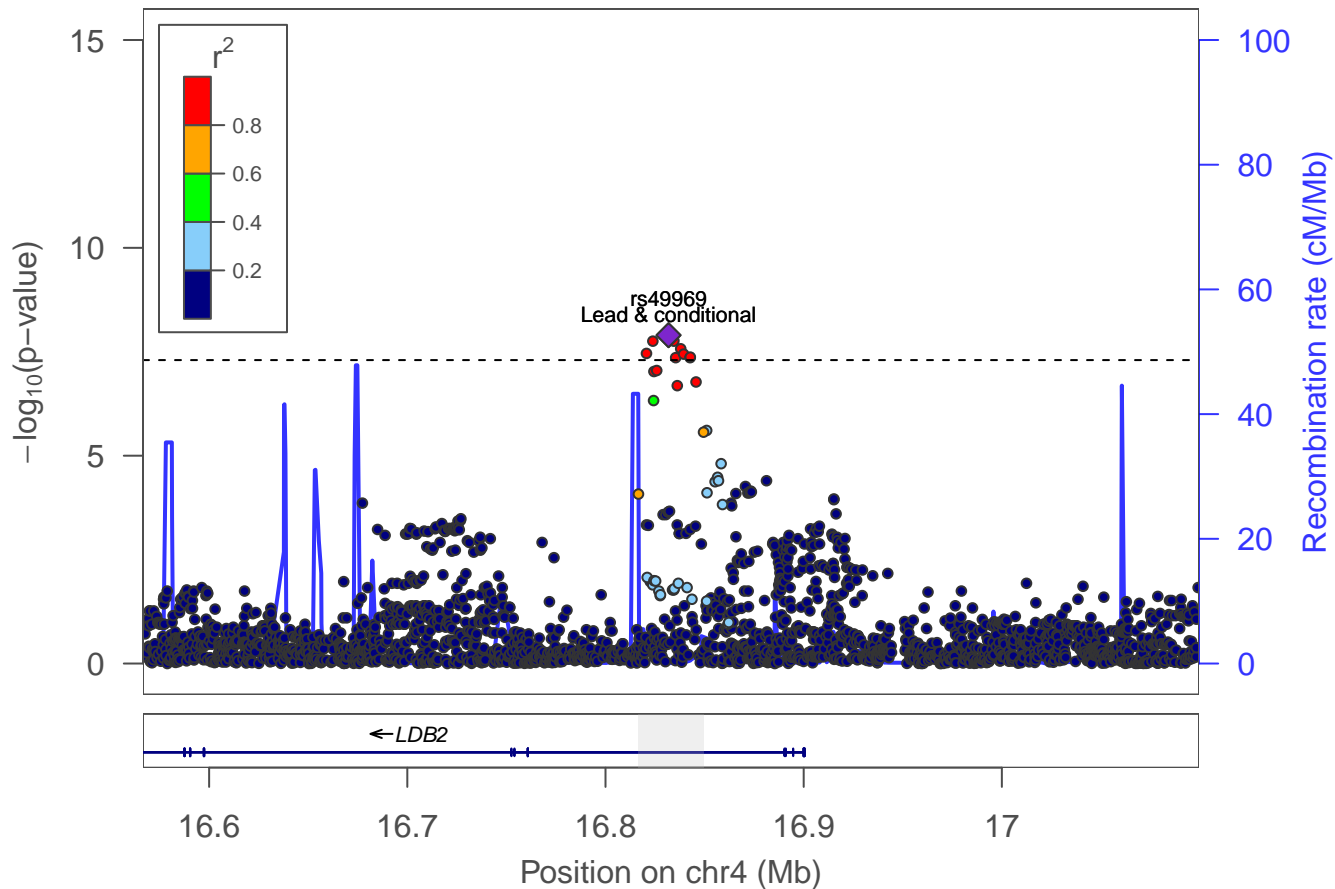

# Number of sexual partners: Locus 32 [chr 4: 30.800–31.161Mb]

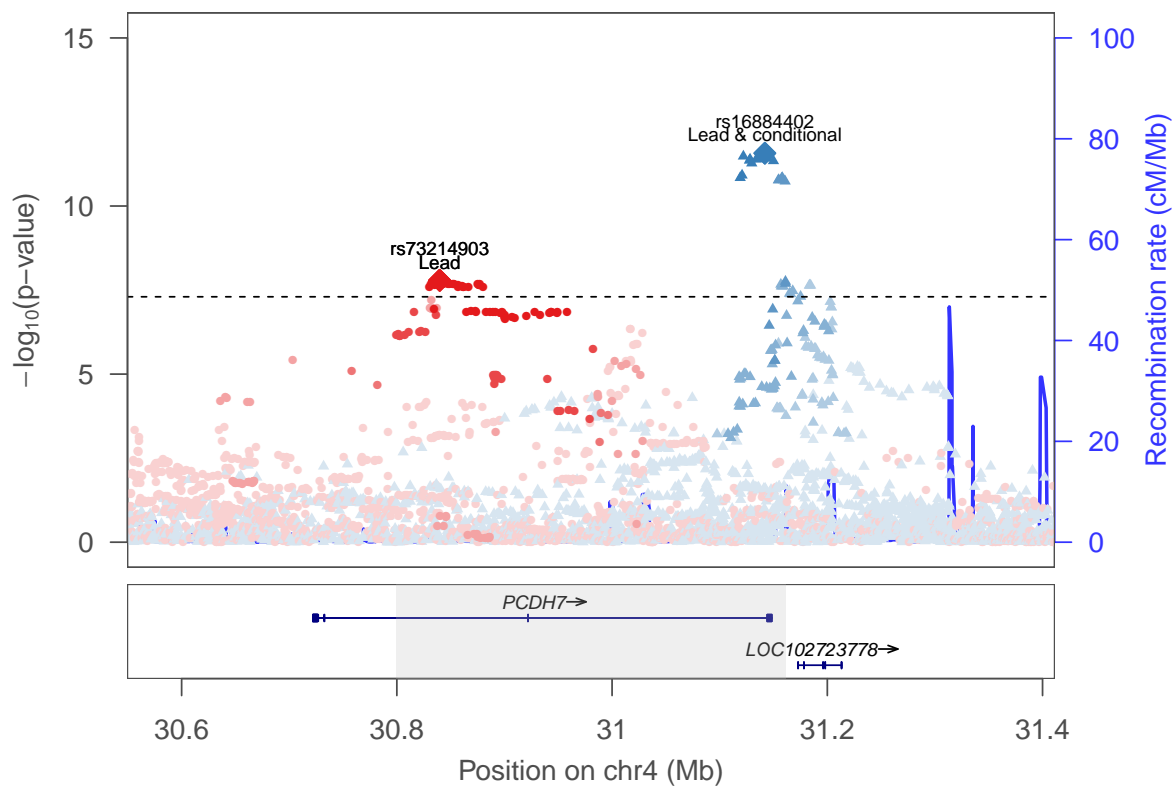

rs16884402 ▲  
rs73214903 ●

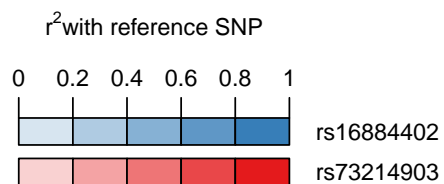

# Number of sexual partners: locus 33 [chr 4:106.064–106.202Mb]

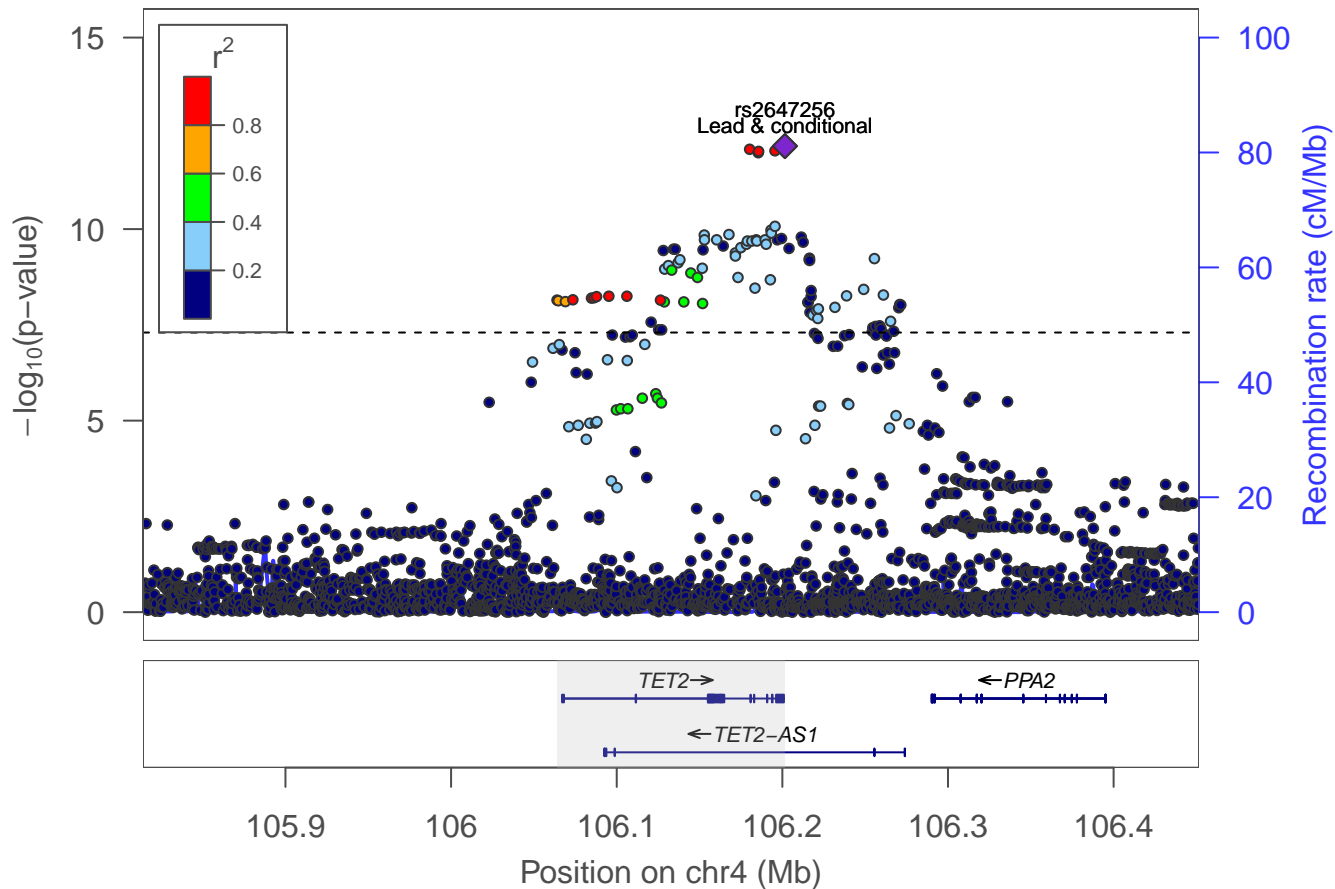

# Number of sexual partners: locus 34 [chr 4:129.741–130.156Mb]

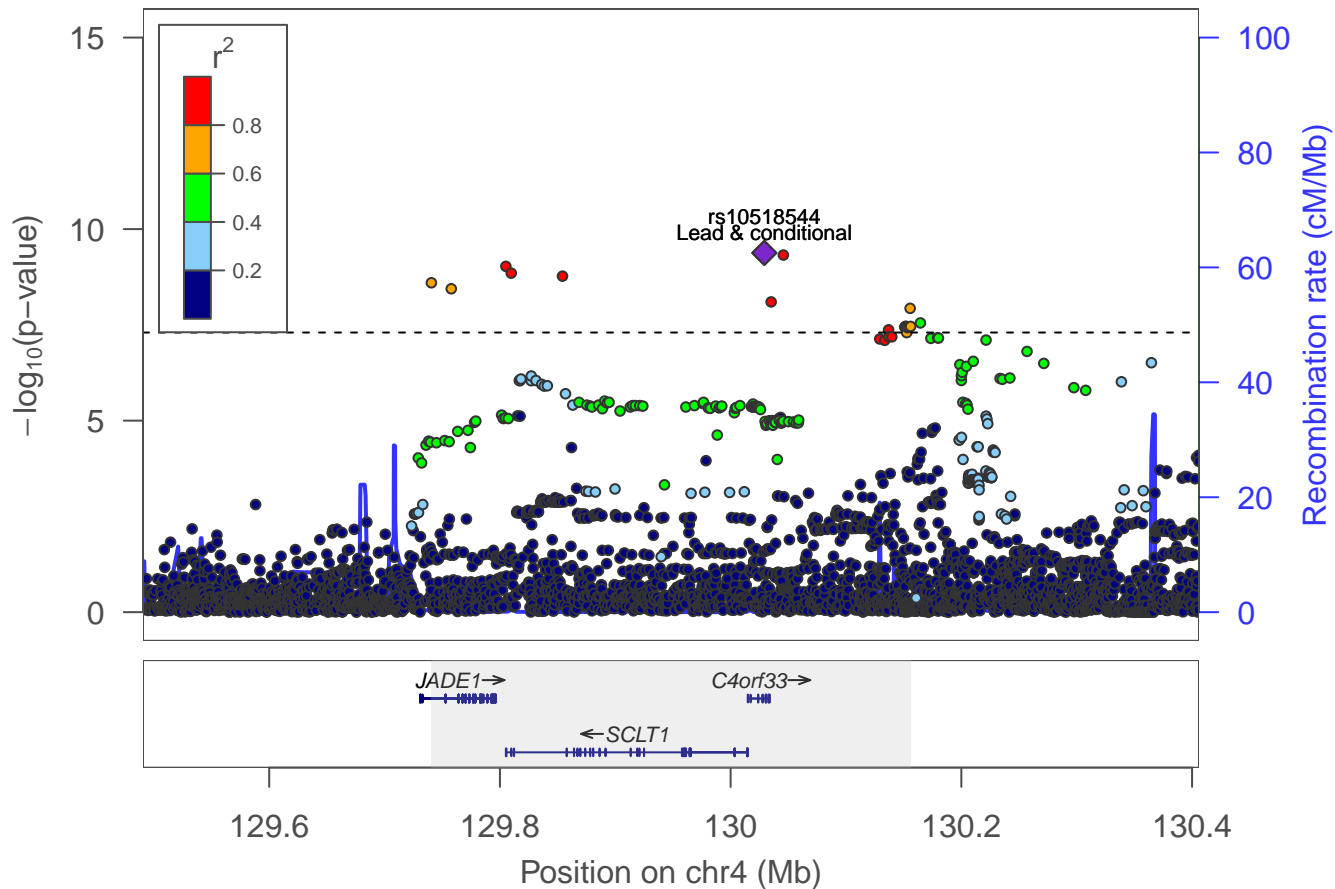

# Number of sexual partners: Locus 35 [chr 5: 46.007–49.776Mb]

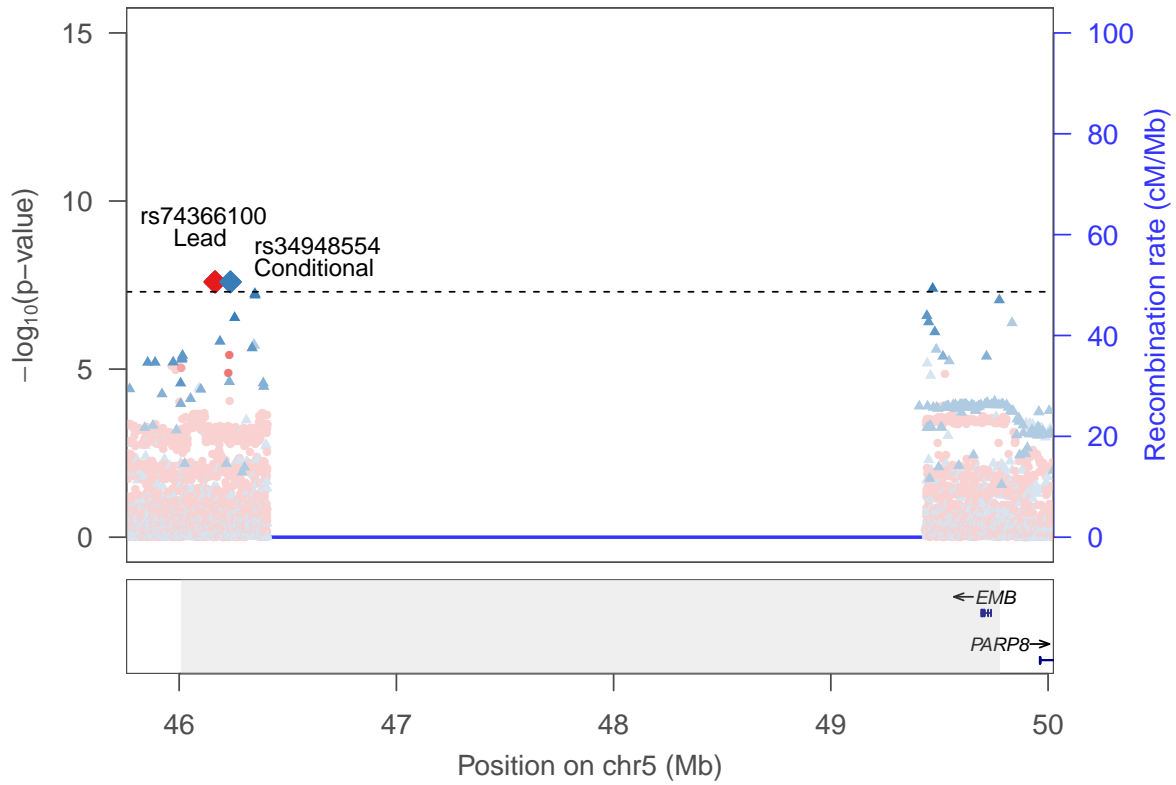

Note: The gap in the locus is because the locus spans the centromere of the chromosome.

rs34948554 ▲  
rs74366100 ●

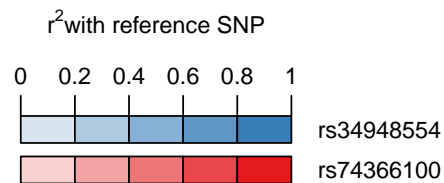



# Number of sexual partners: Locus 36 [chr 5: 87.457–87.854Mb]

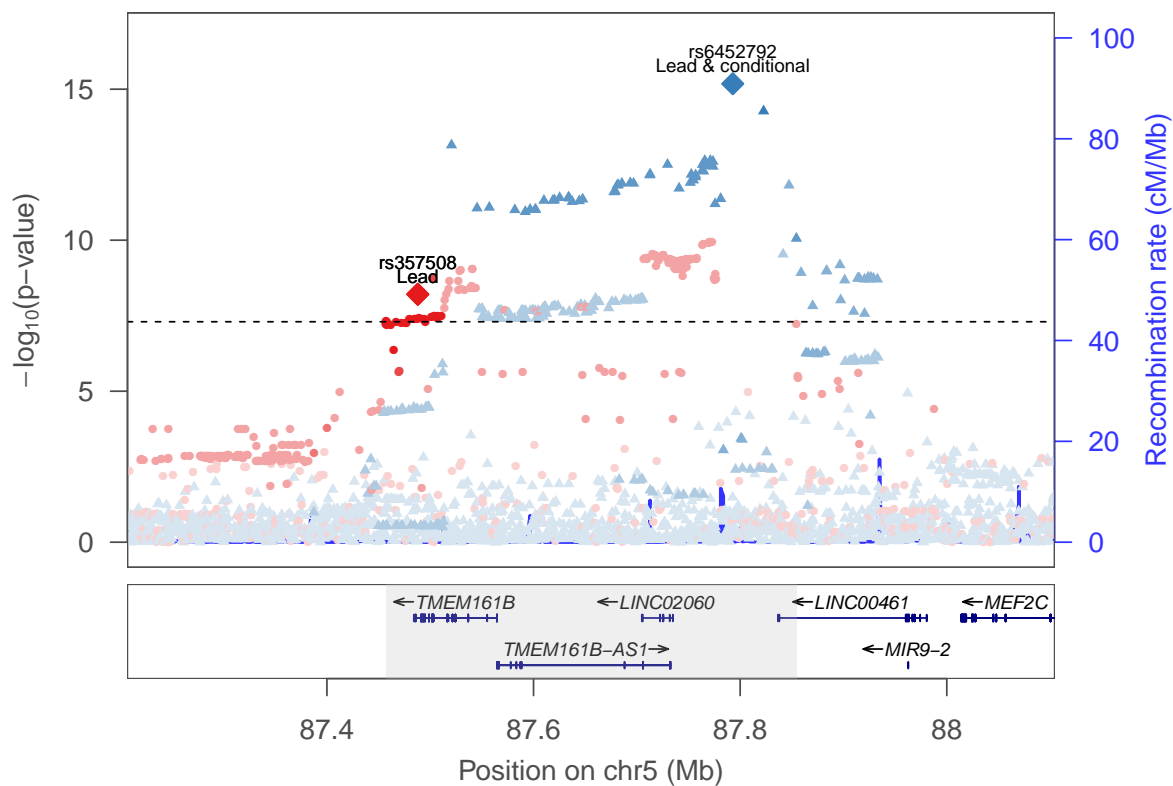

rs6452792 ▲  
rs357508 ●

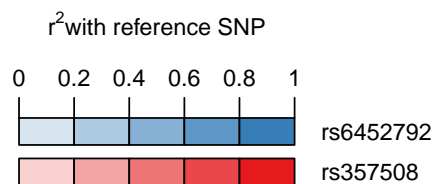

# Number of sexual partners: Locus 37 [chr 5: 103.708–104.082Mb]

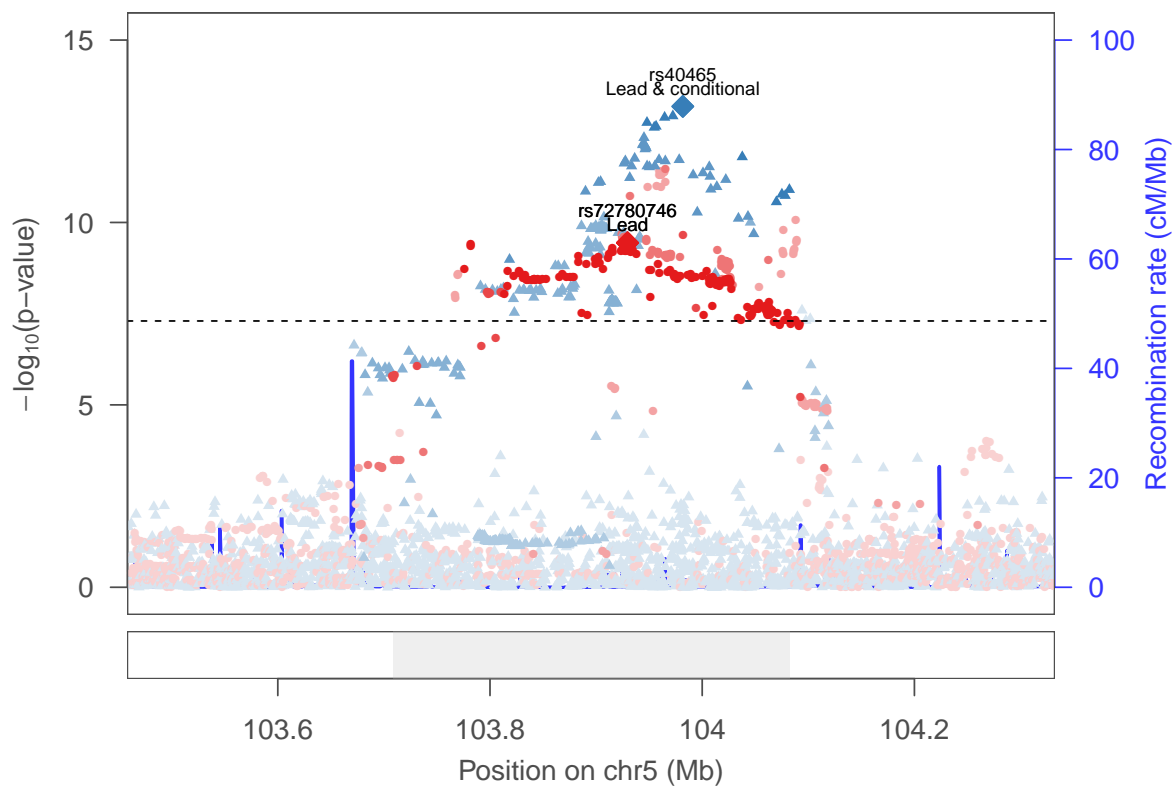

rs40465 ▲  
rs72780746 ●

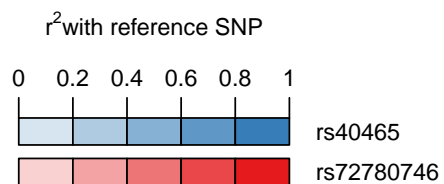

# Number of sexual partners: locus 38 [chr 5:108.992–109.024Mb]

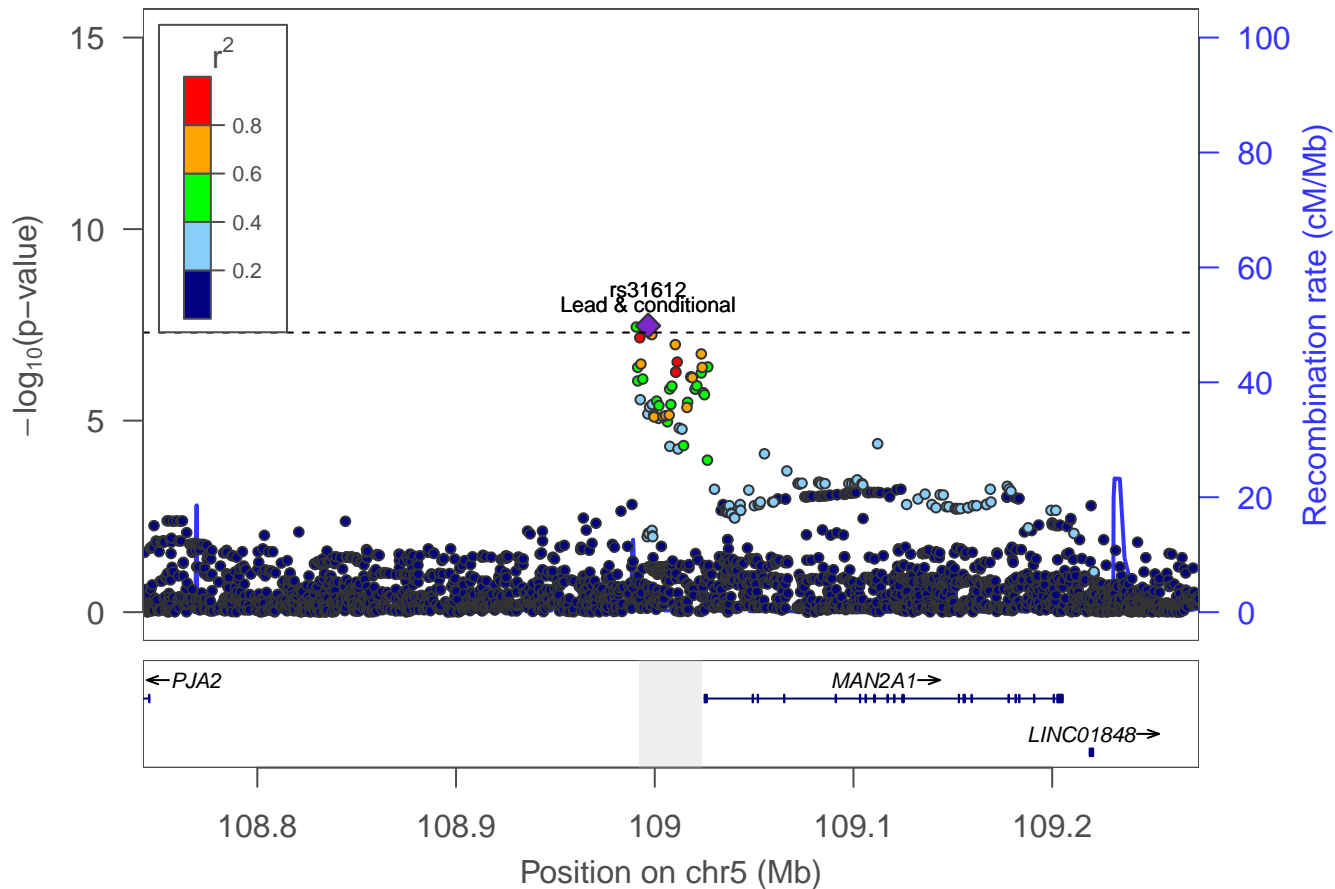

# Number of sexual partners: locus 39 [chr 5:151.925–152.340Mb]

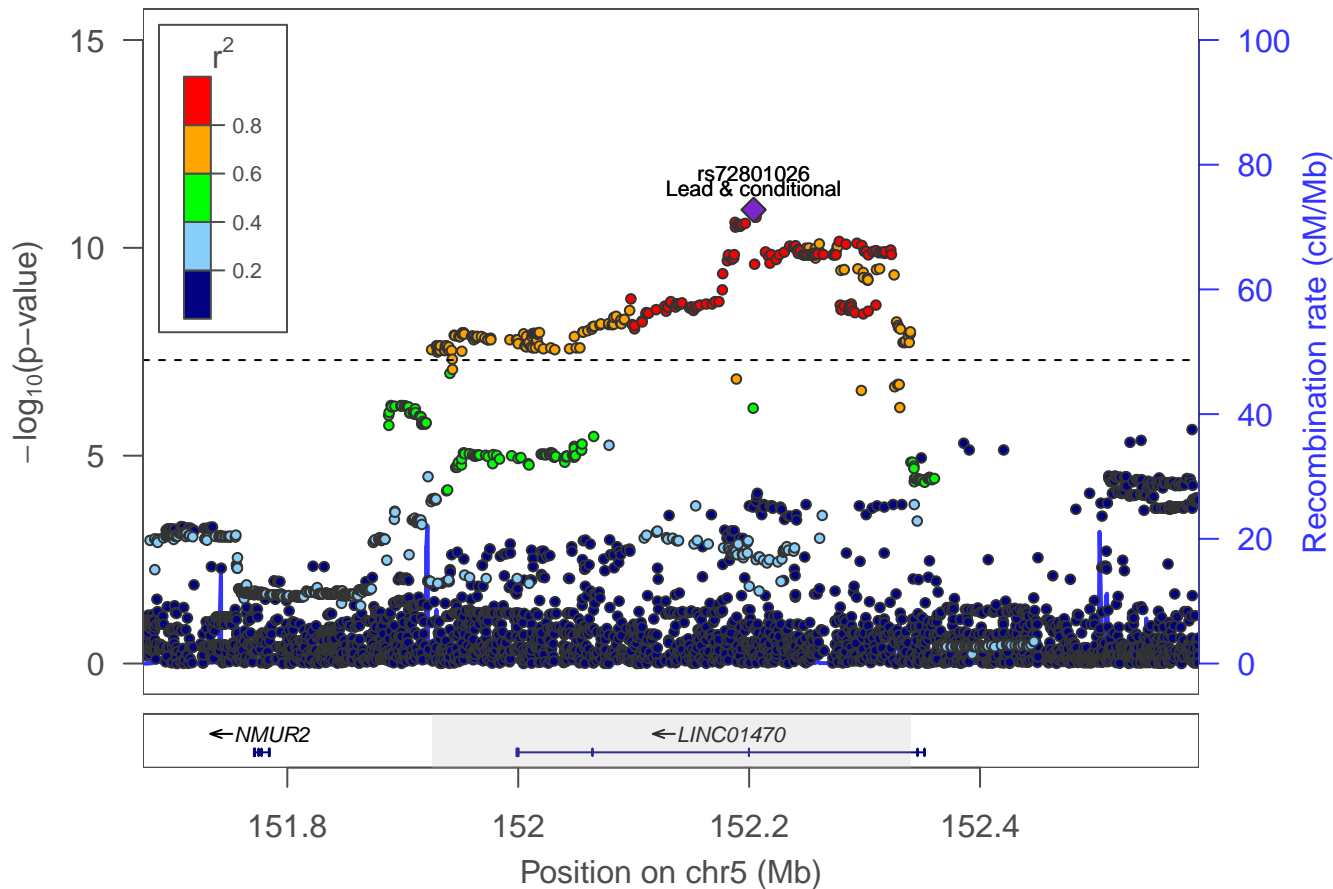

# Number of sexual partners: locus 40 [chr 5:164.472–164.680Mb]

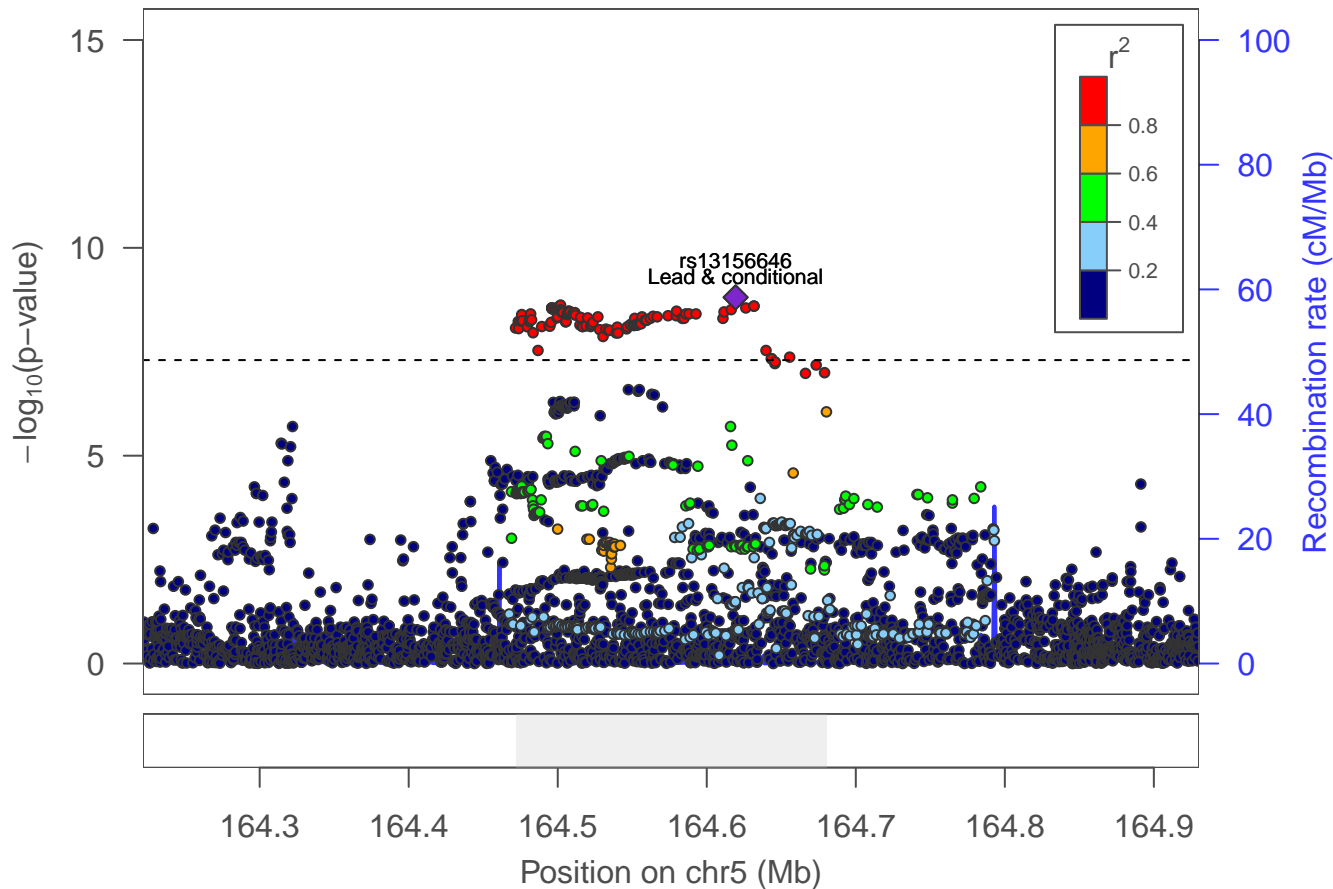

# Number of sexual partners: Locus 41 [chr 5: 166.929–167.241Mb]

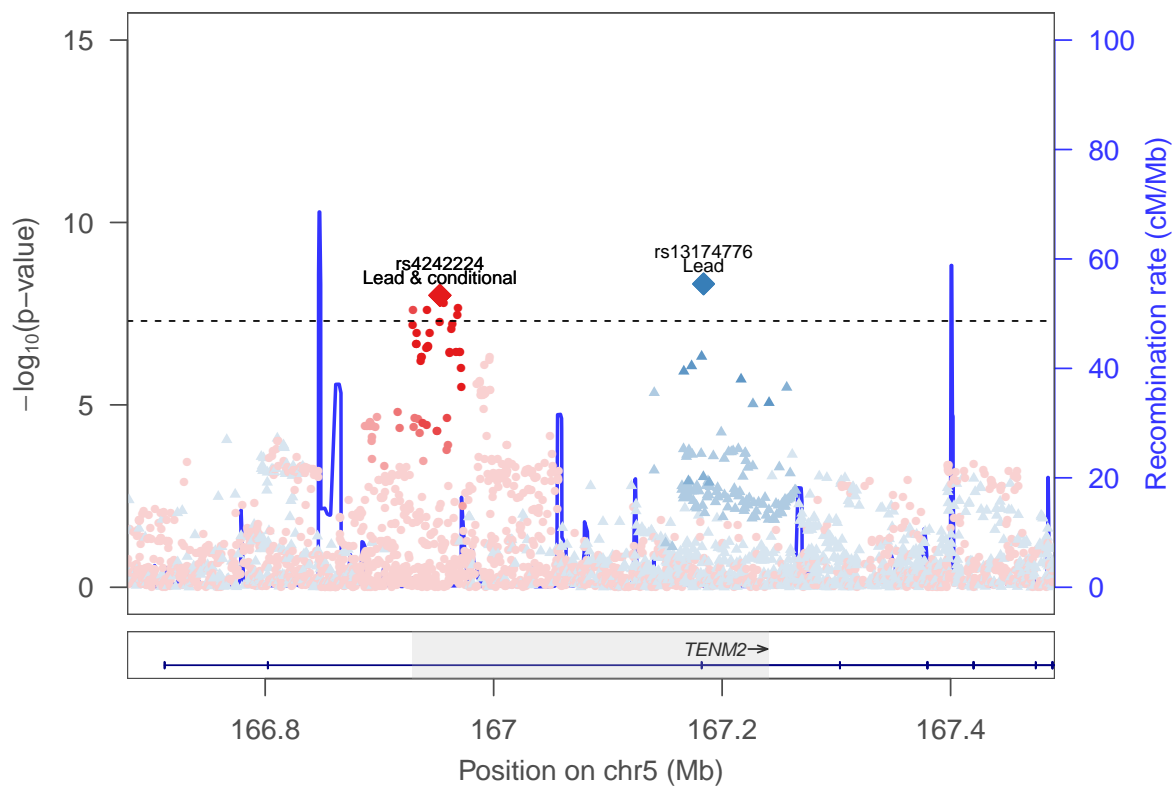

rs13174776 ▲  
rs4242224 ●

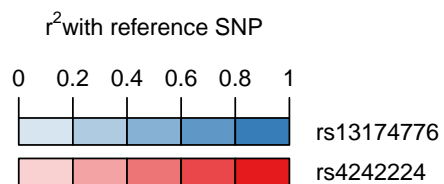

# Number of sexual partners: Locus 42 [chr 6: 26.091–30.318Mb]

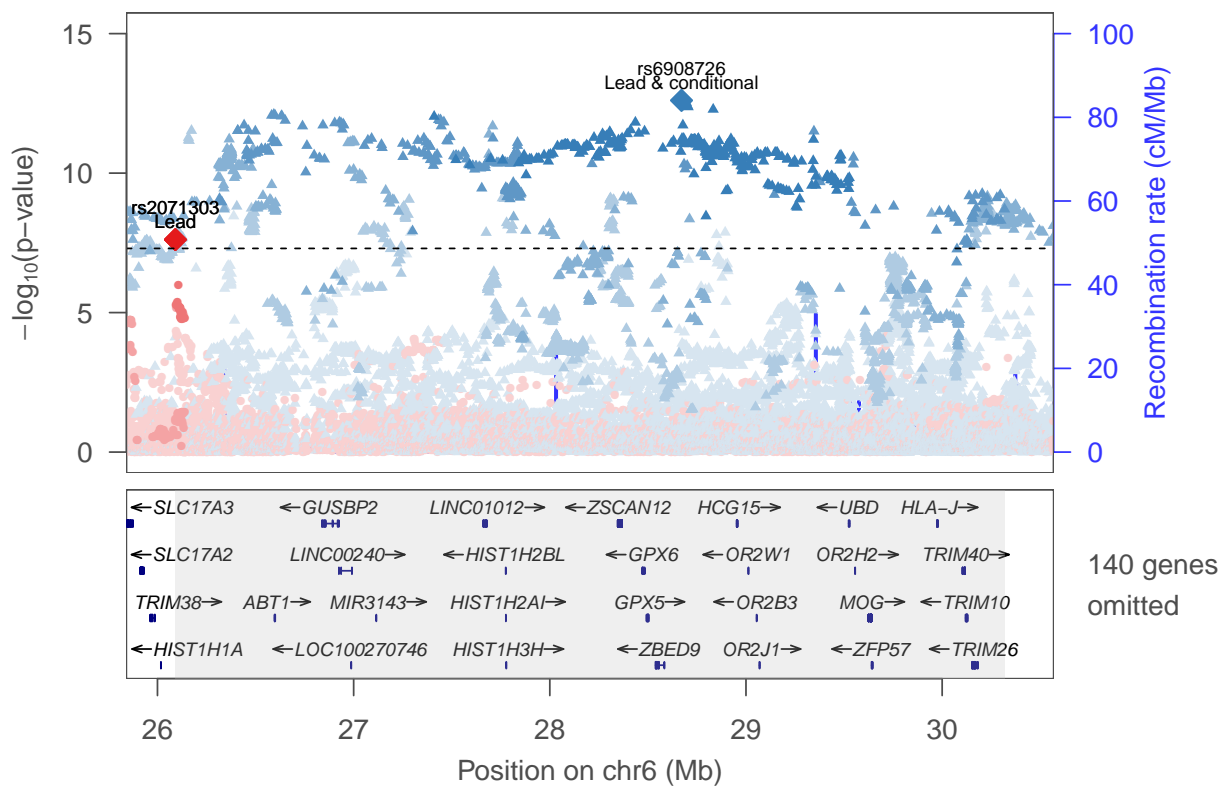

rs6908726 ▲  
 rs2071303 ●

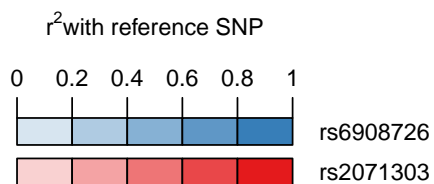

# Number of sexual partners: locus 43\* [chr 6:30.653–30.653Mb]

\* As described in **Supplementary Information section 3.4.5**, we exclude SNP rs138394556 and locus 43 from our counts of the number-of-sexual-partners lead SNPs and loci.

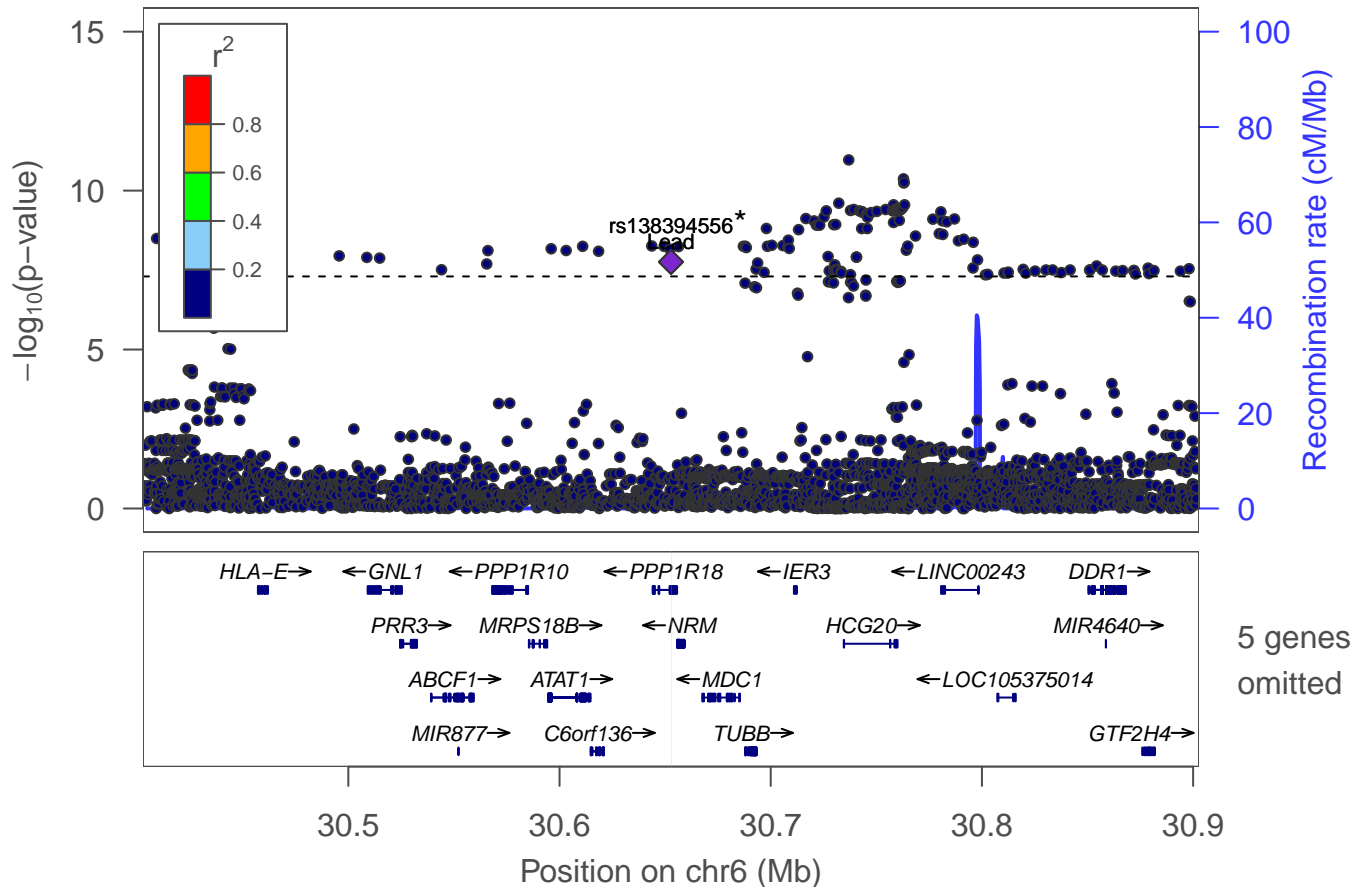



# Number of sexual partners: locus 44 [chr 6:67.405–67.549Mb]

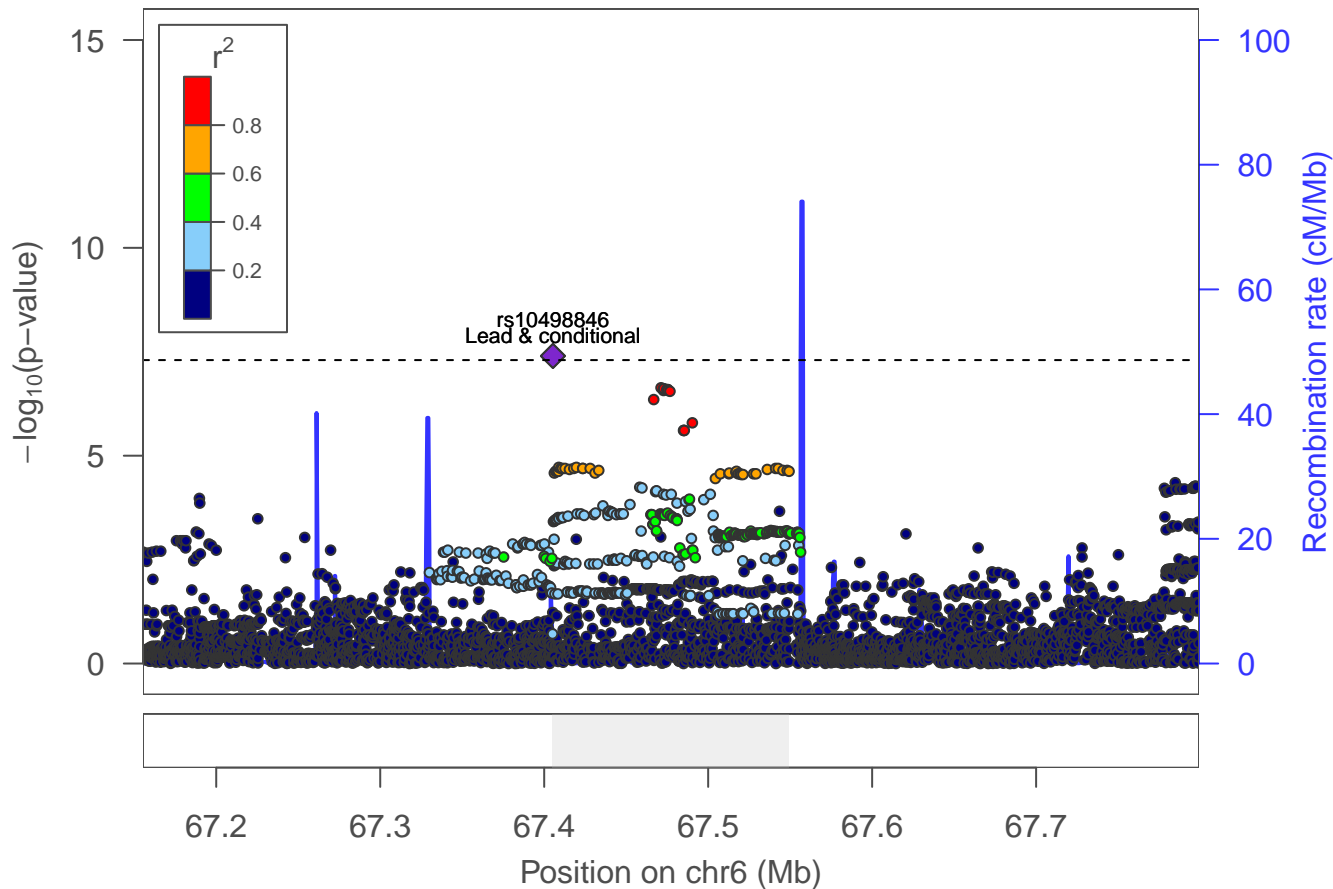

# Number of sexual partners: Locus 45 [chr 6: 98.298–98.891Mb]

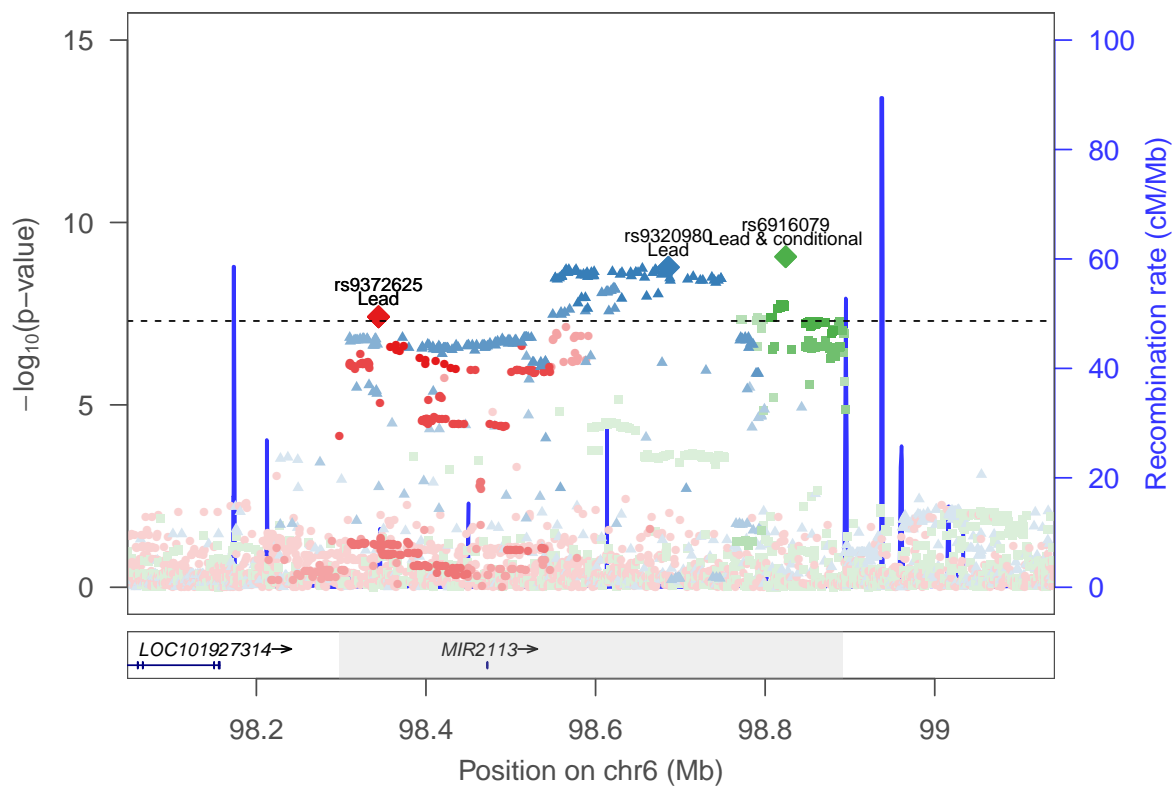

rs6916079 ■  
rs9320980 ▲  
rs9372625 ●

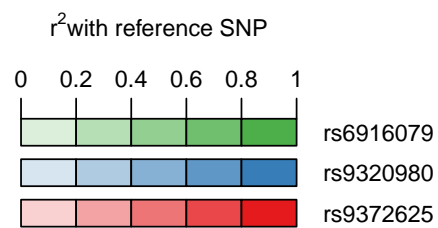

# Number of sexual partners: locus 46 [chr 6:100.987–101.502Mb]

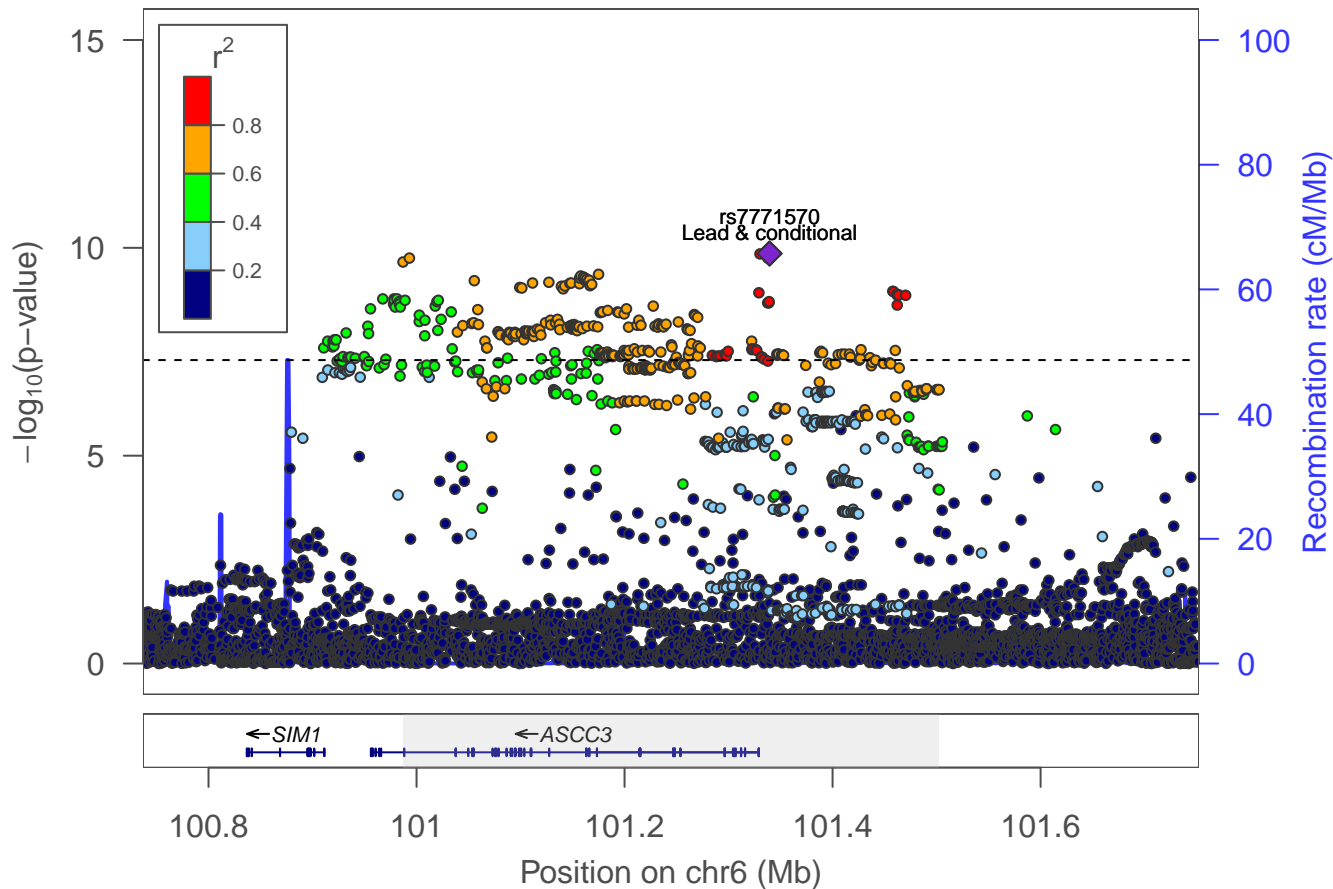

# Number of sexual partners: locus 47 [chr 6:151.850–151.892Mb]

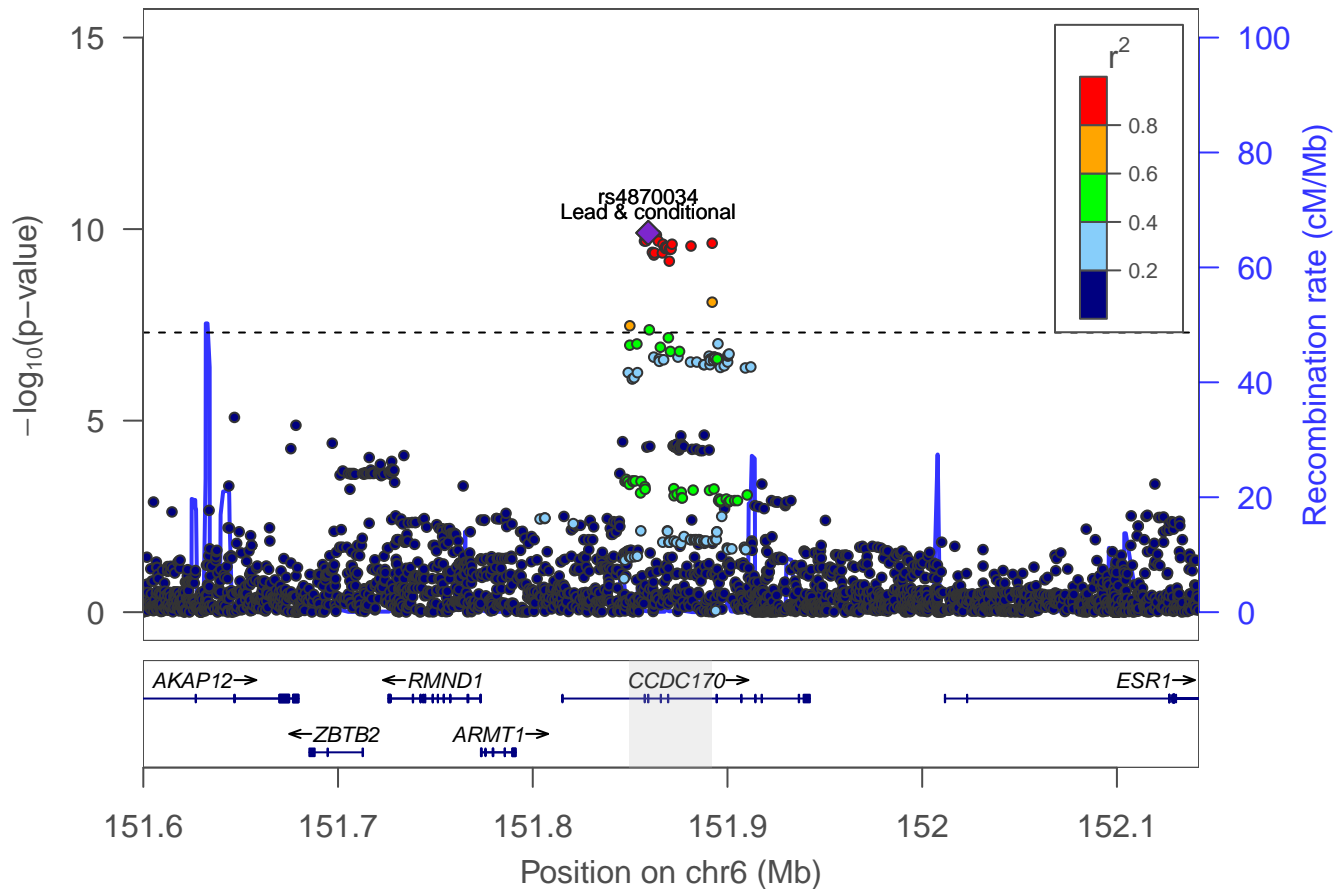

# Number of sexual partners: locus 48 [chr 7:1.873–2.163Mb]

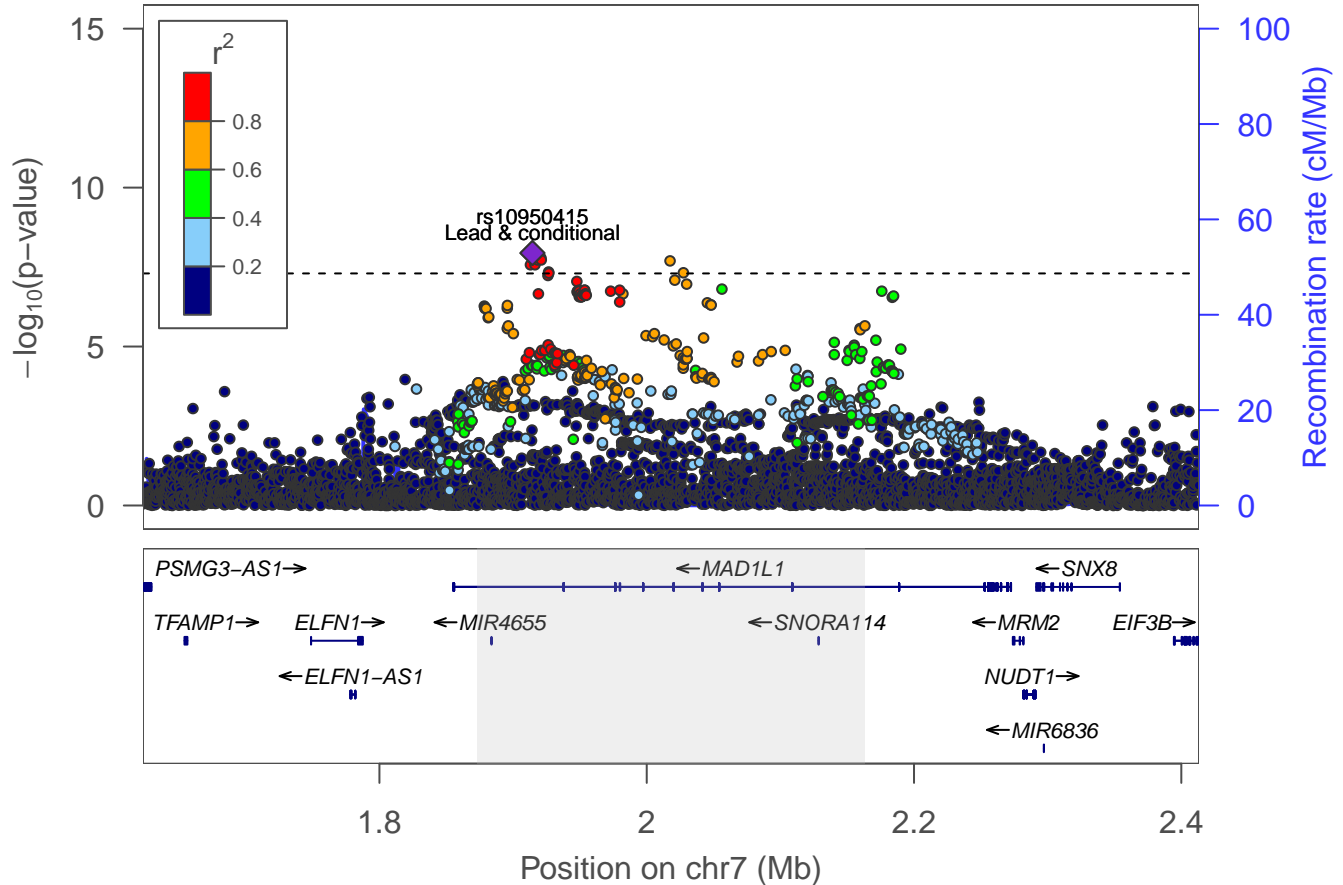

# Number of sexual partners: locus 49 [chr 7:114.040–114.287Mb]

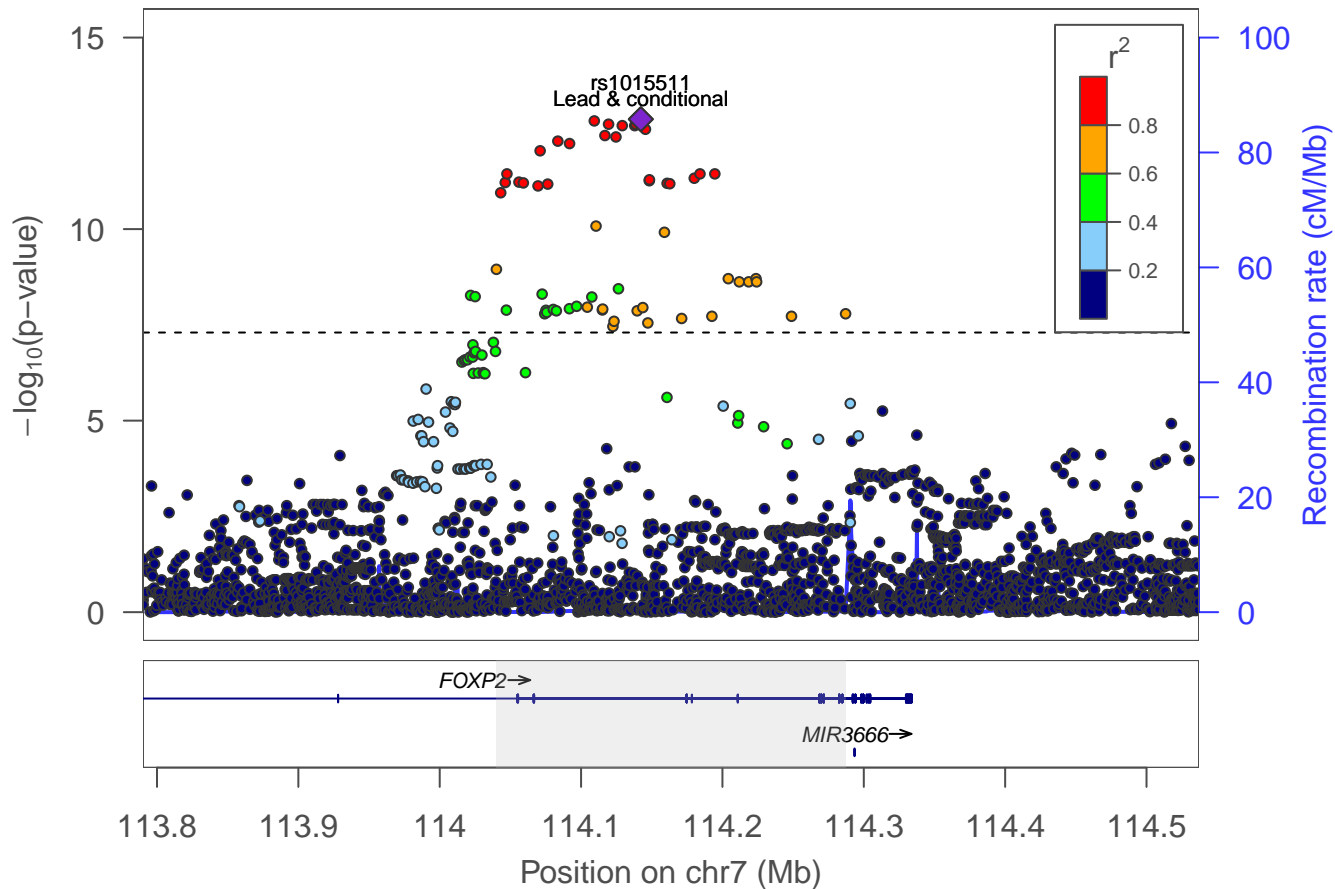

# Number of sexual partners: Locus 50 [chr 7: 114.950–115.322Mb]

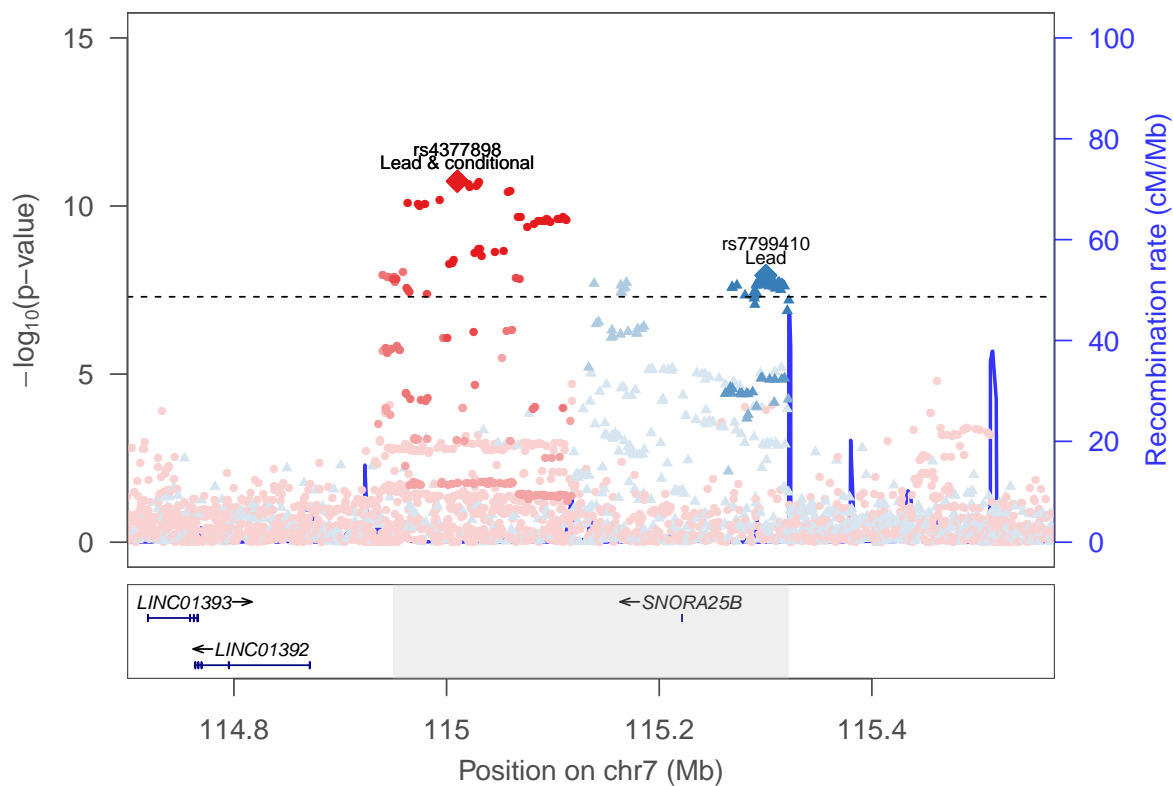

rs7799410 ▲  
rs4377898 ●

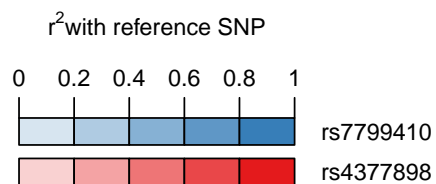

# Number of sexual partners: locus 51 [chr 7:121.955–121.967Mb]

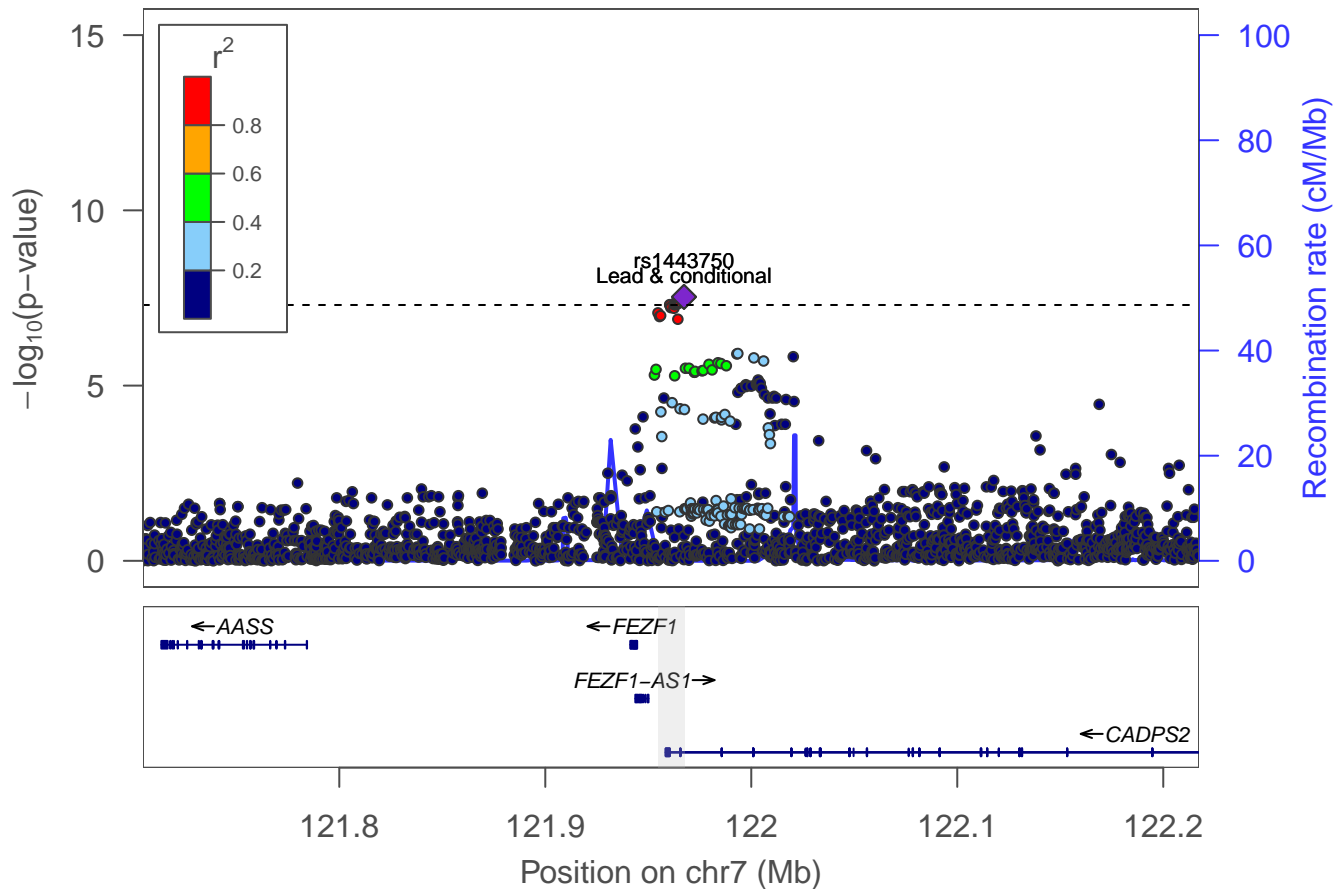



# Number of sexual partners: locus 52 [chr 7:127.252–127.490Mb]

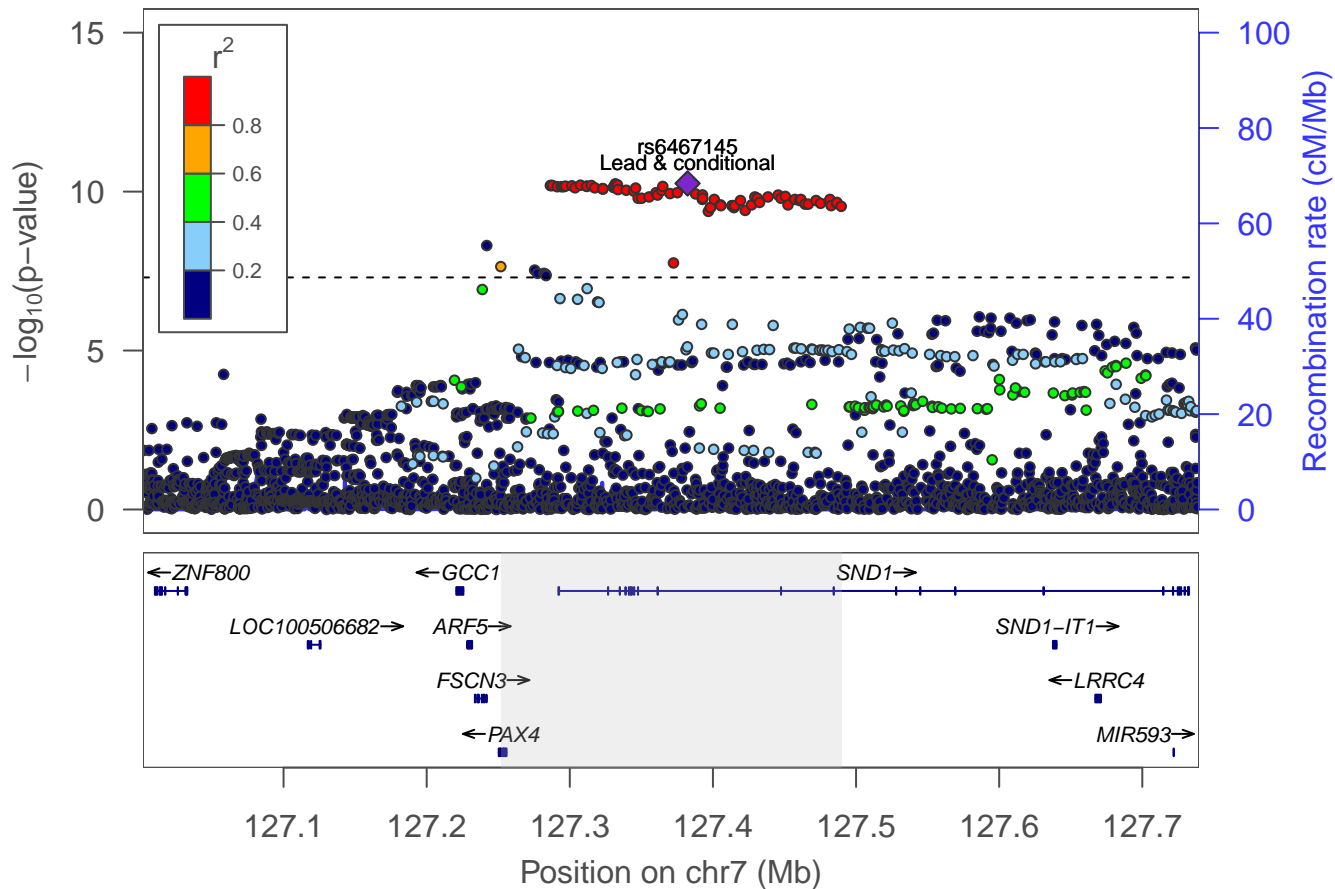

# Number of sexual partners: locus 53 [chr 7:133.819–133.895Mb]

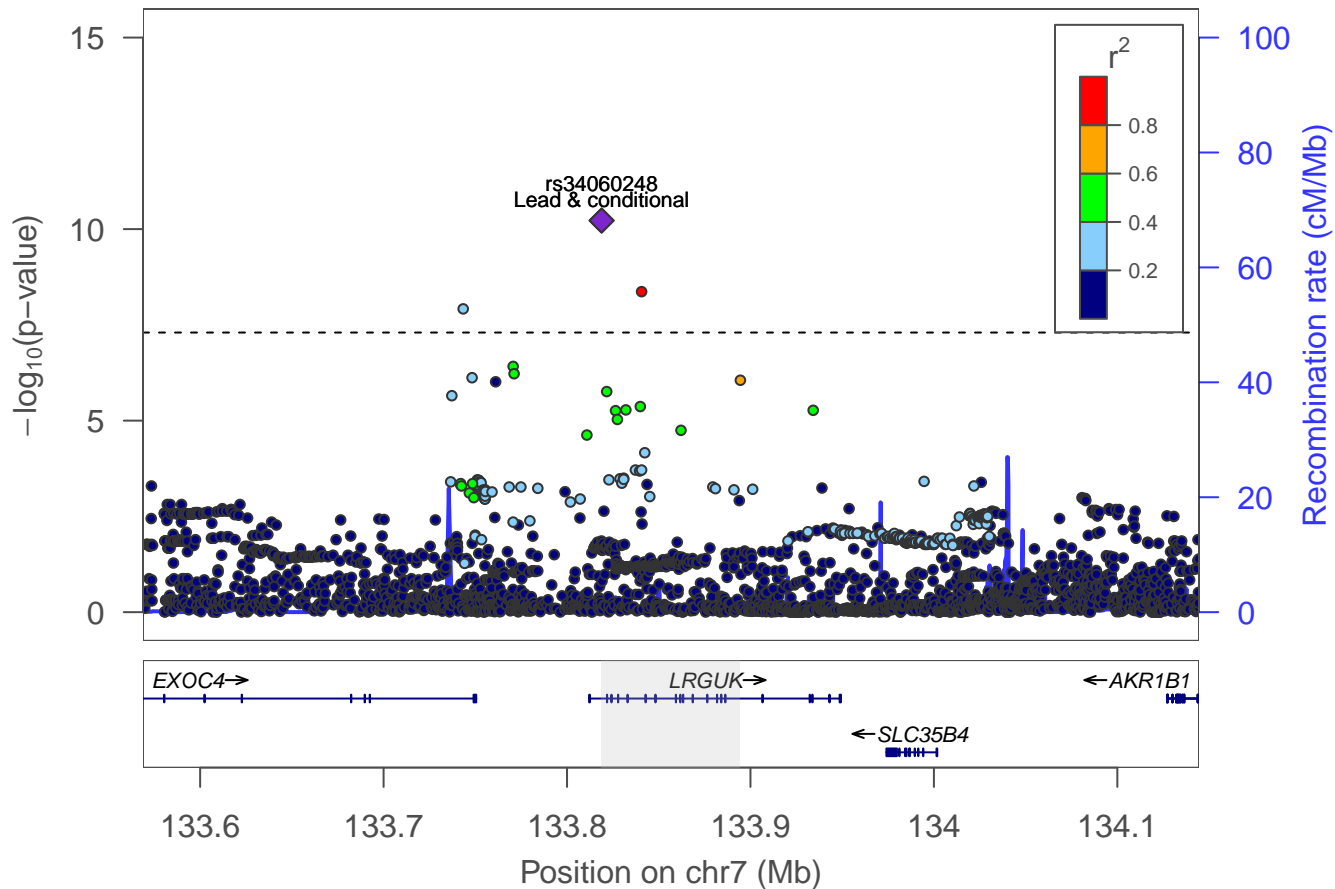

# Number of sexual partners: locus 54 [chr 7:140.120–140.183Mb]

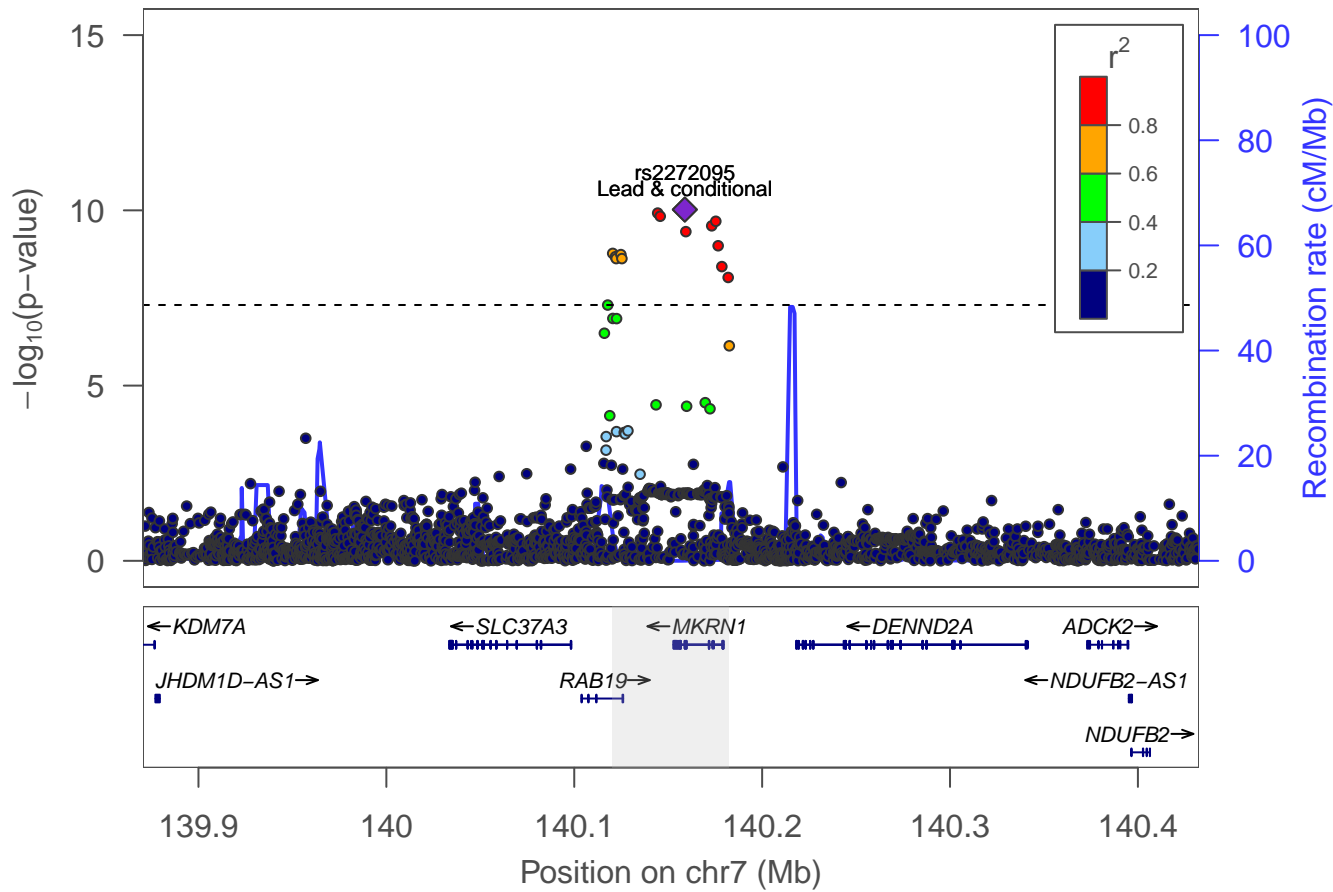

# Number of sexual partners: locus 55 [chr 7:158.111–158.122Mb]

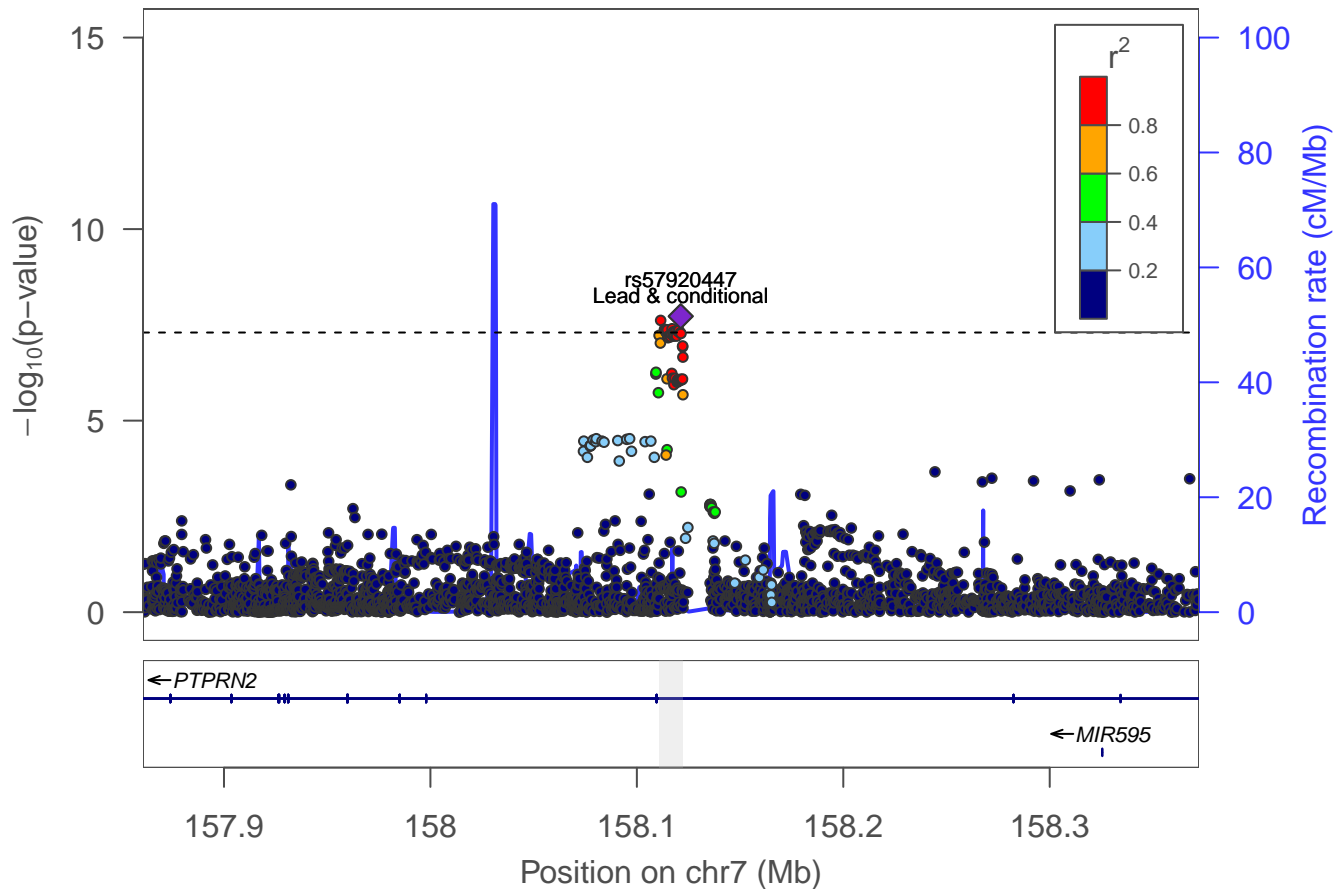

# Number of sexual partners: locus 56 [chr 8:9.108–9.139Mb]

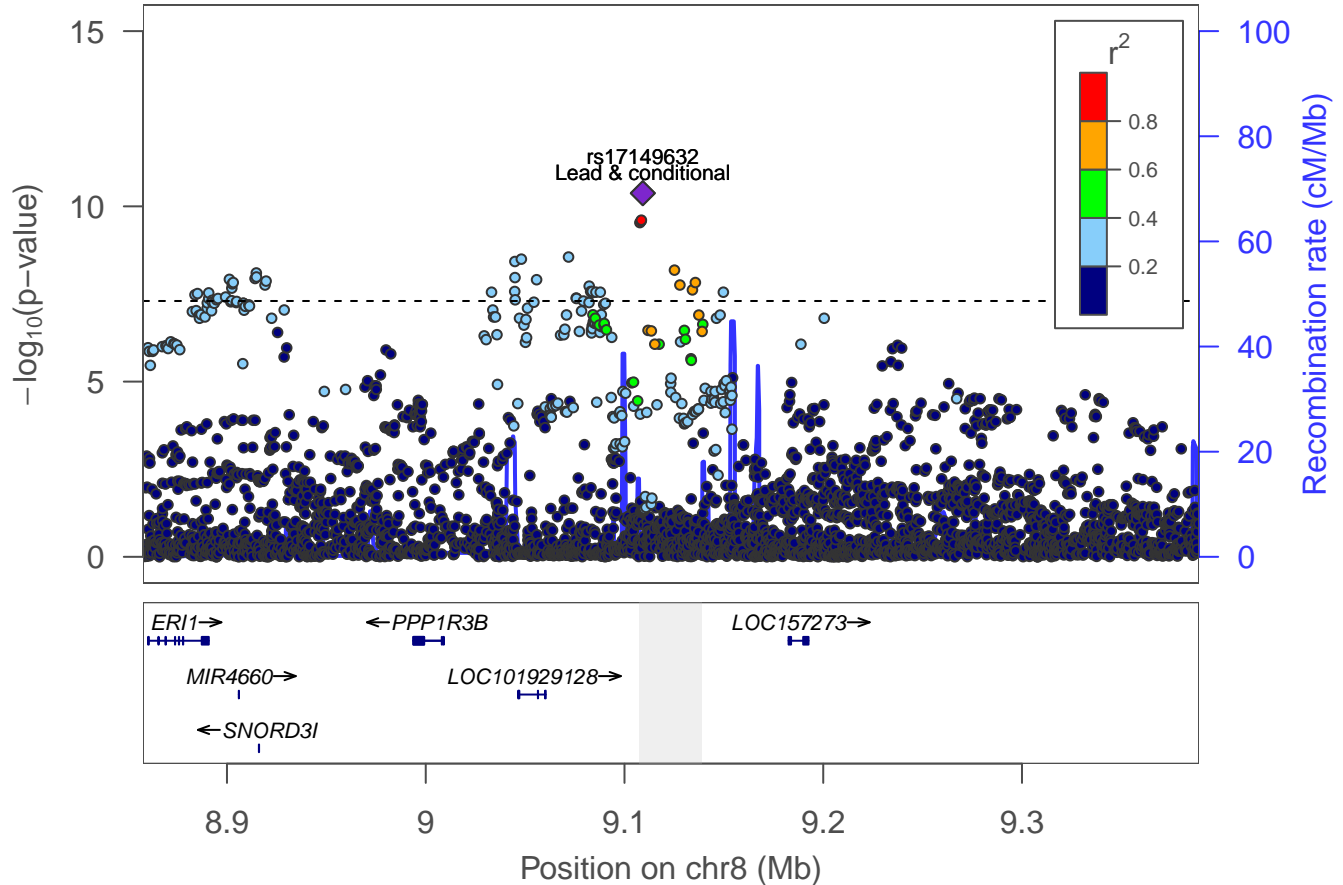

# Number of sexual partners: locus 57 [chr 8:10.584–10.722Mb]

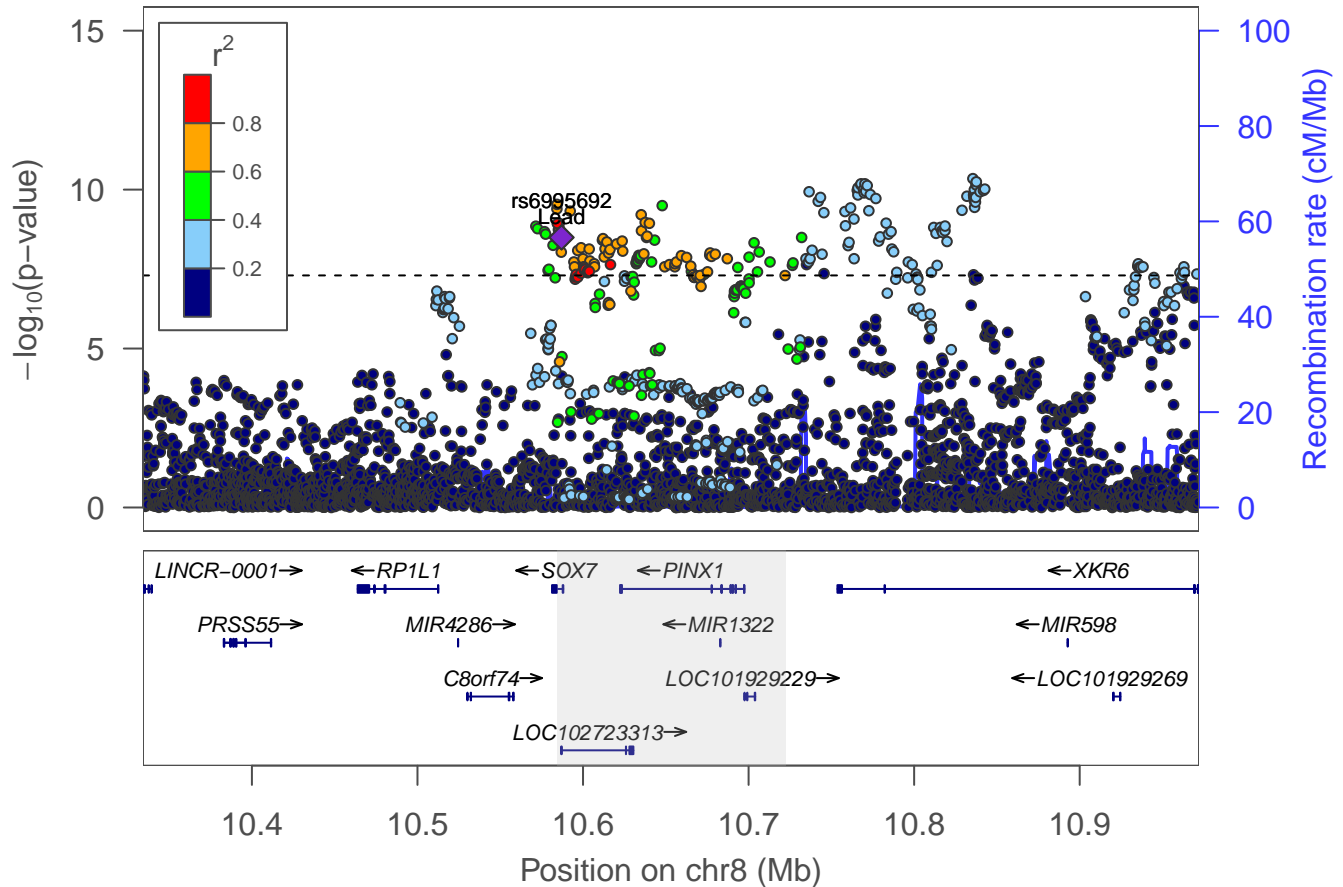

# Number of sexual partners: locus 58 [chr 8:11.421–11.421Mb]

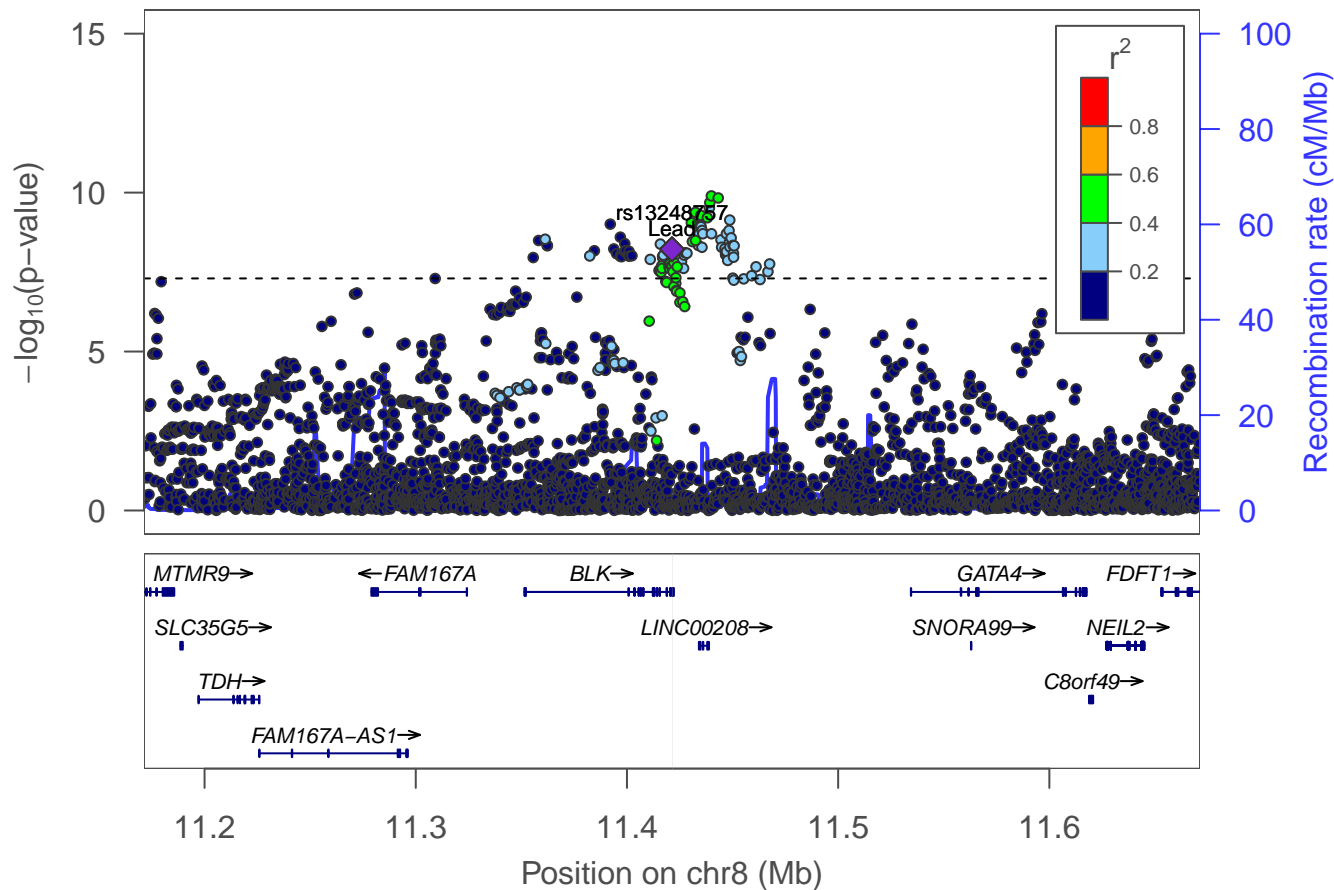

# Number of sexual partners: locus 59 [chr 8:11.812–11.836Mb]

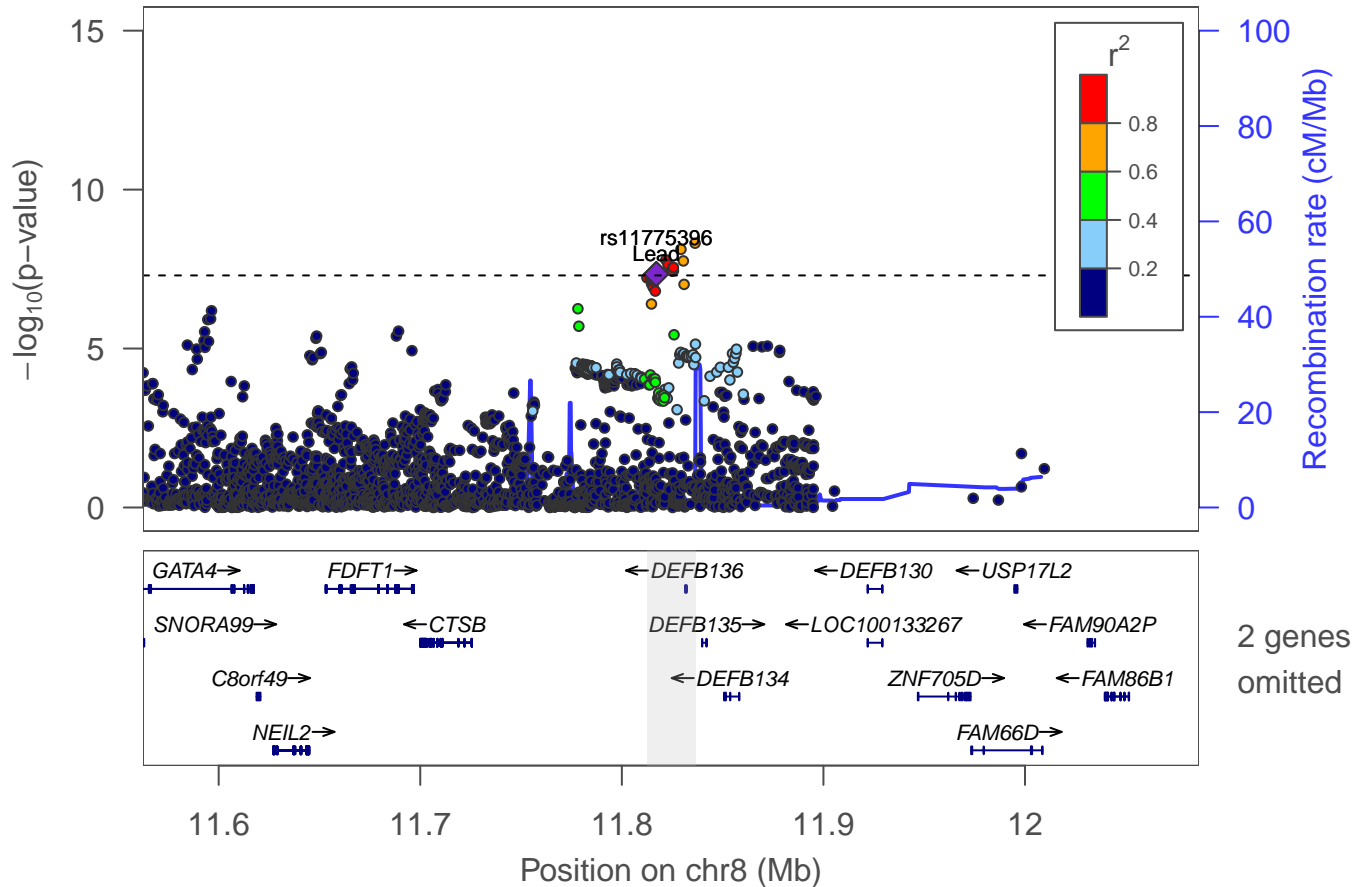



# Number of sexual partners: locus 60 [chr 8:65.438–65.682Mb]

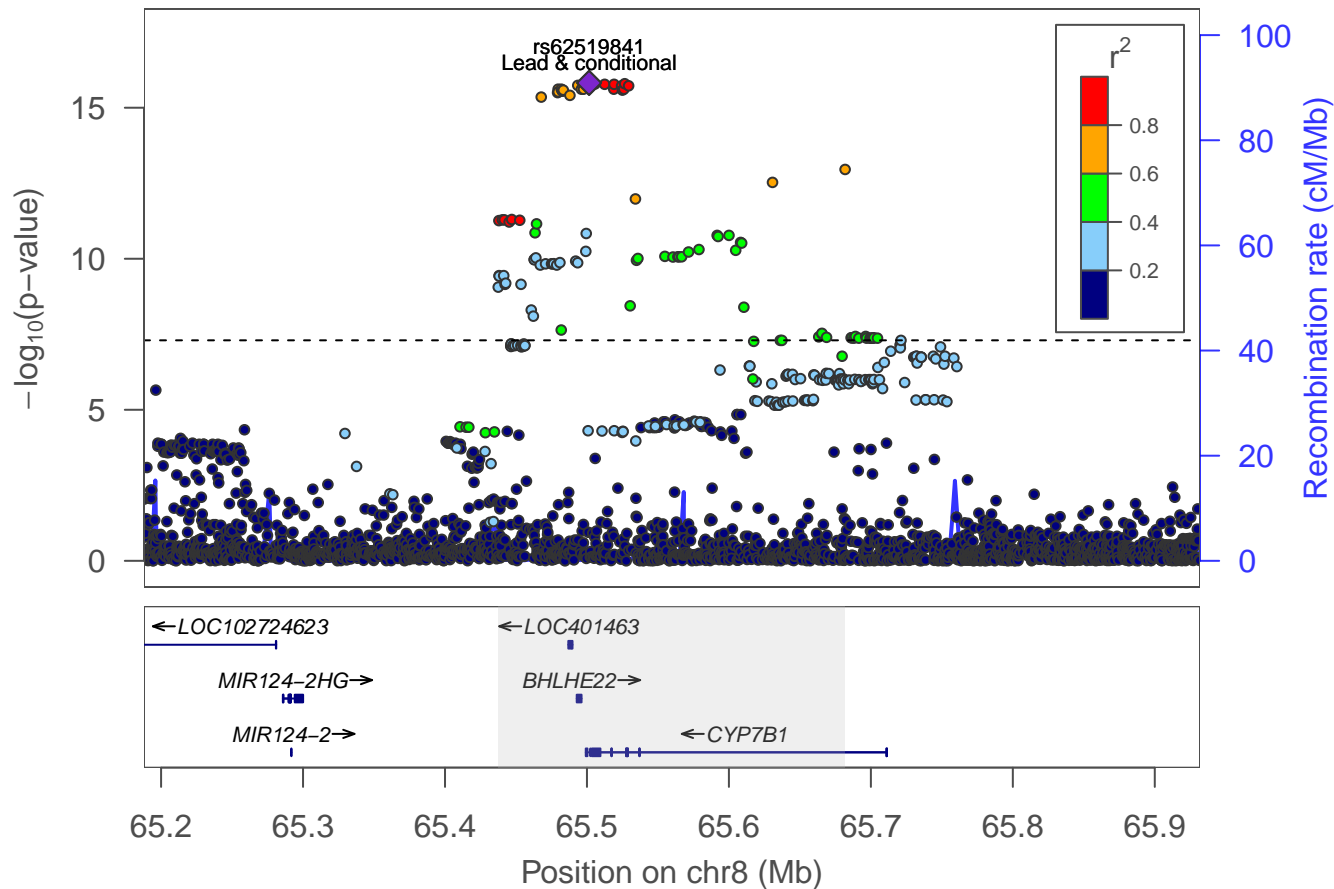

# Number of sexual partners: locus 61 [chr 8:76.750–76.773Mb]

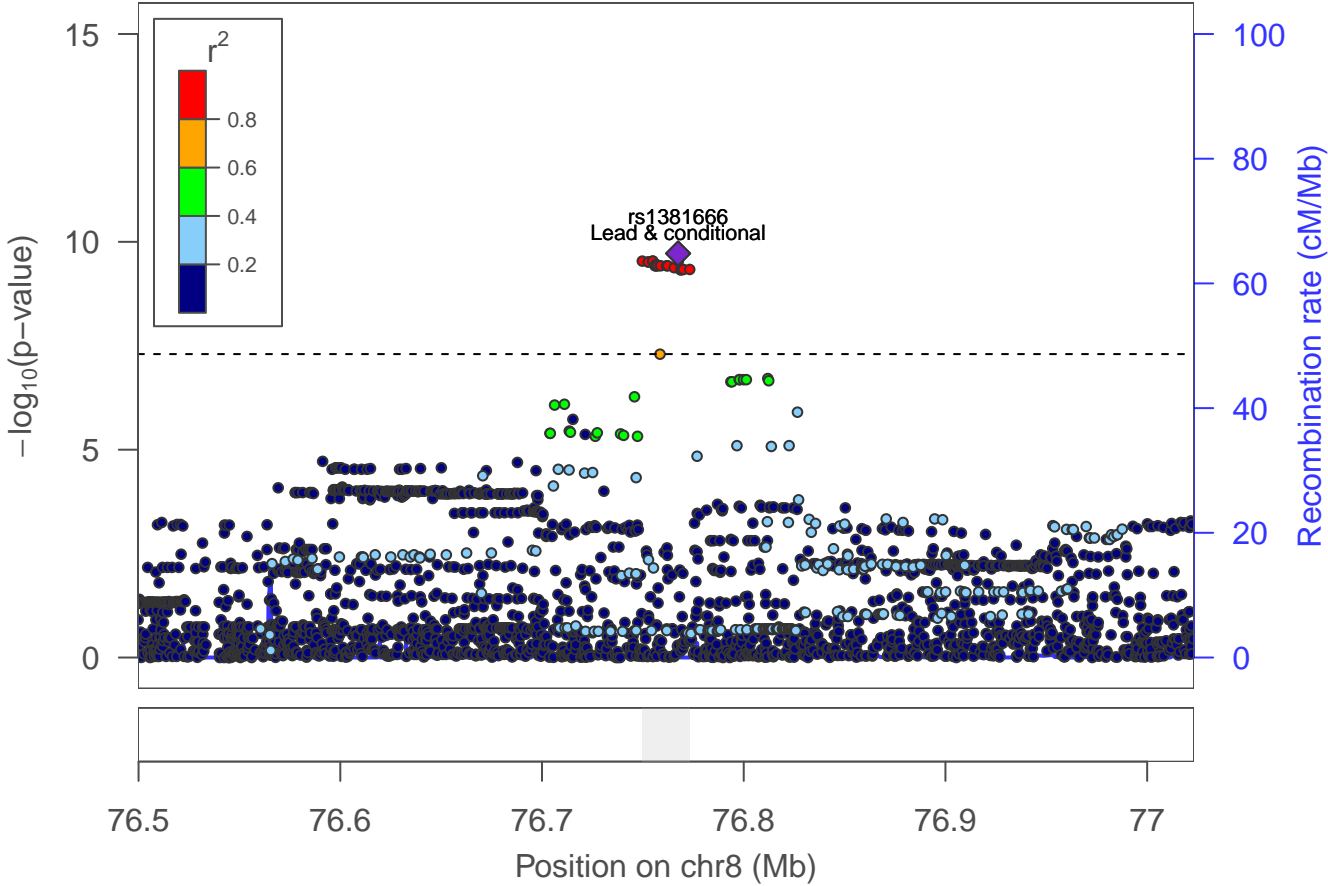

# Number of sexual partners: locus 62 [chr 8:93.184–93.262Mb]

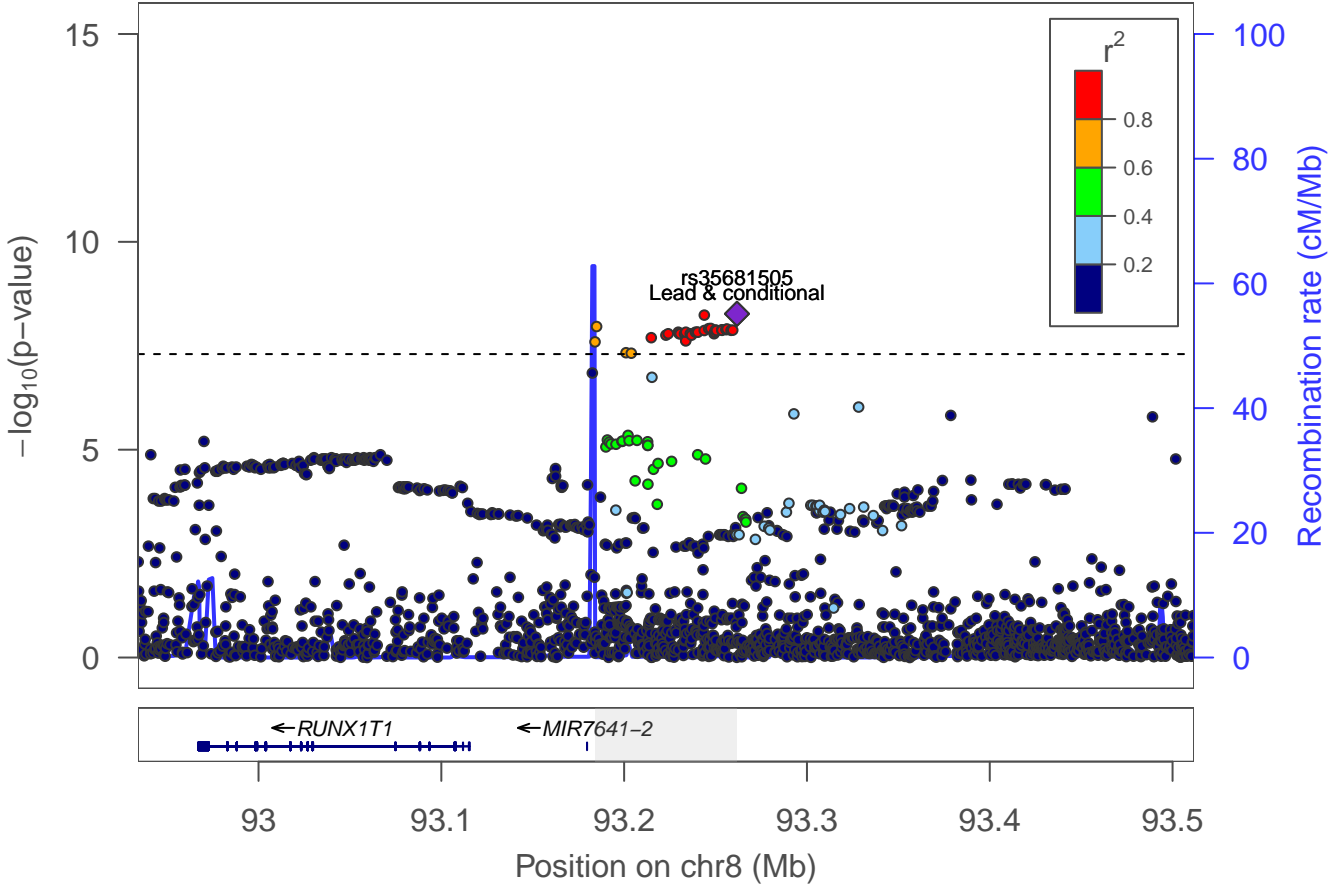

# Number of sexual partners: locus 63 [chr 9:29.007–29.149Mb]

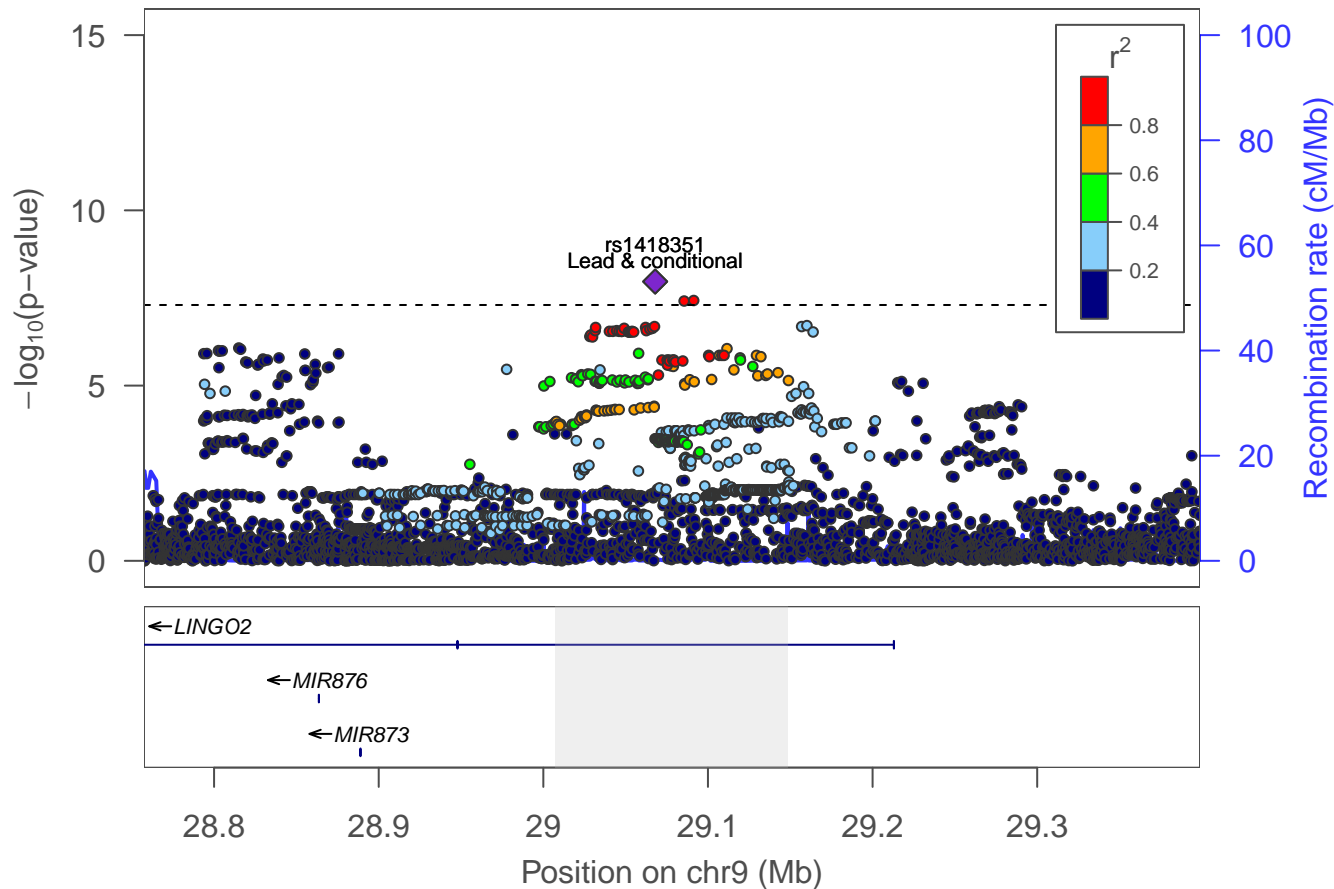

# Number of sexual partners: locus 64 [chr 9:74.374–74.381Mb]

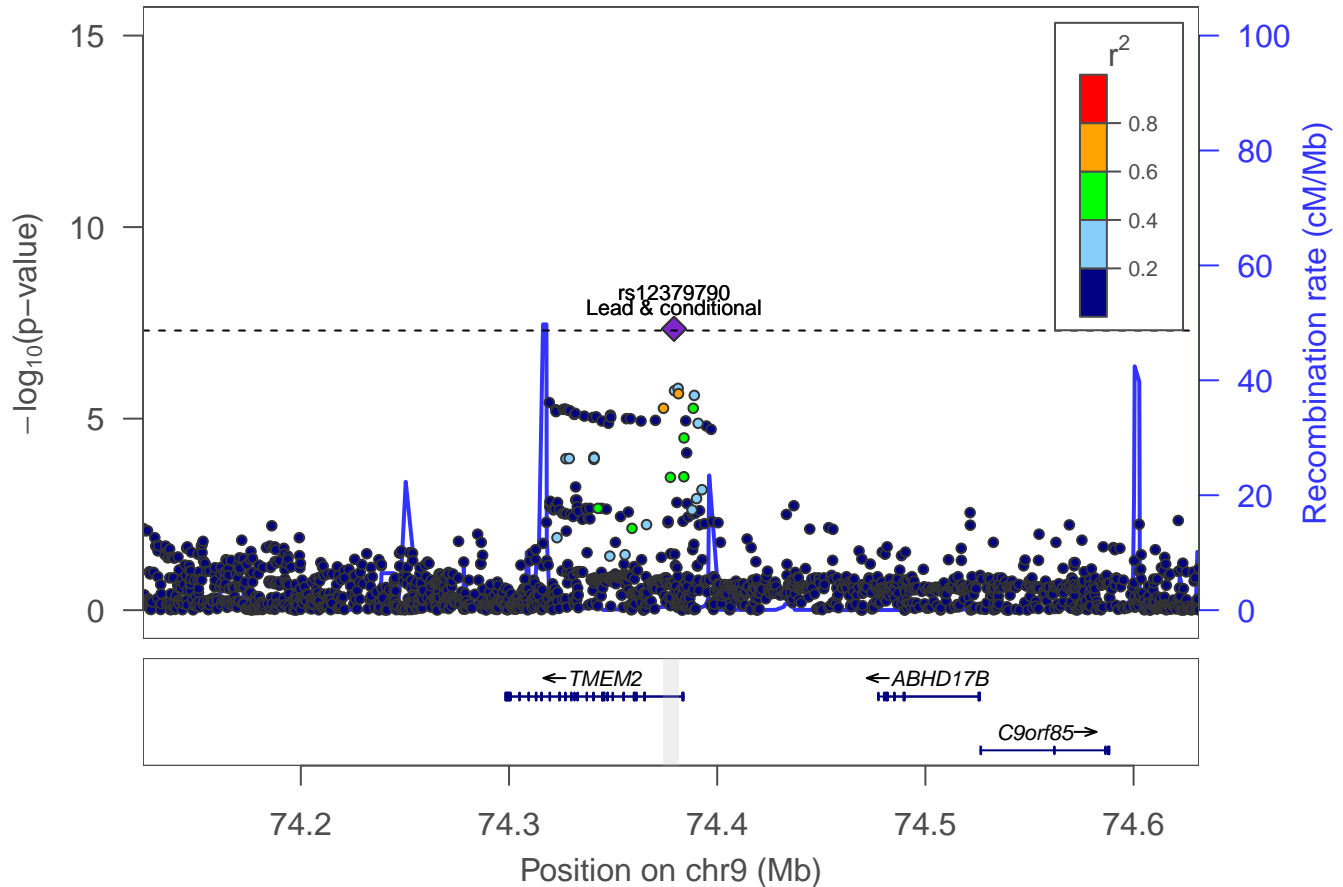

# Number of sexual partners: locus 65 [chr 10:104.612–104.963Mb]

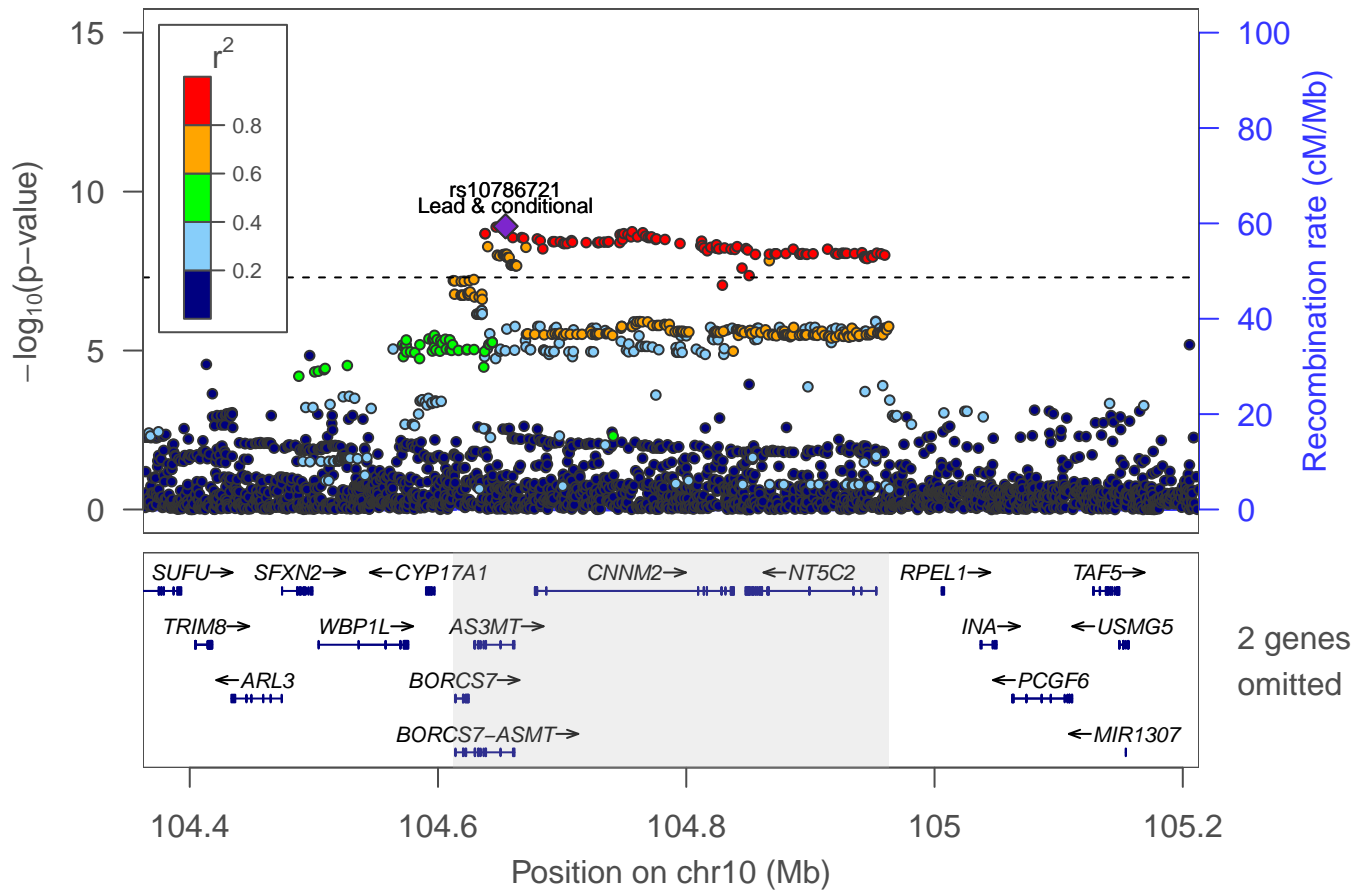

# Number of sexual partners: locus 66 [chr 10:134.135–134.168Mb]

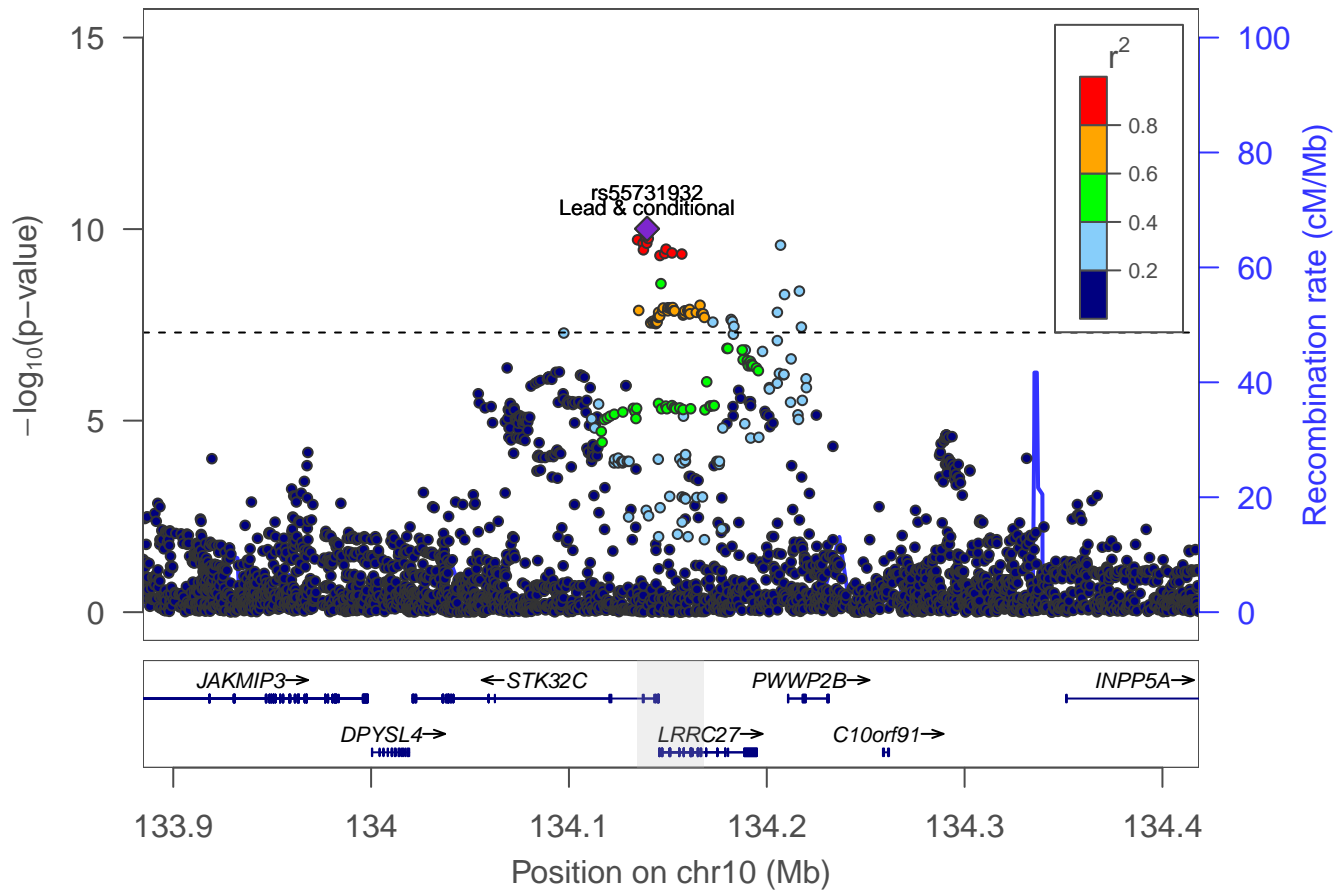

# Number of sexual partners: Locus 67 [chr 11: 28.588–28.698Mb]

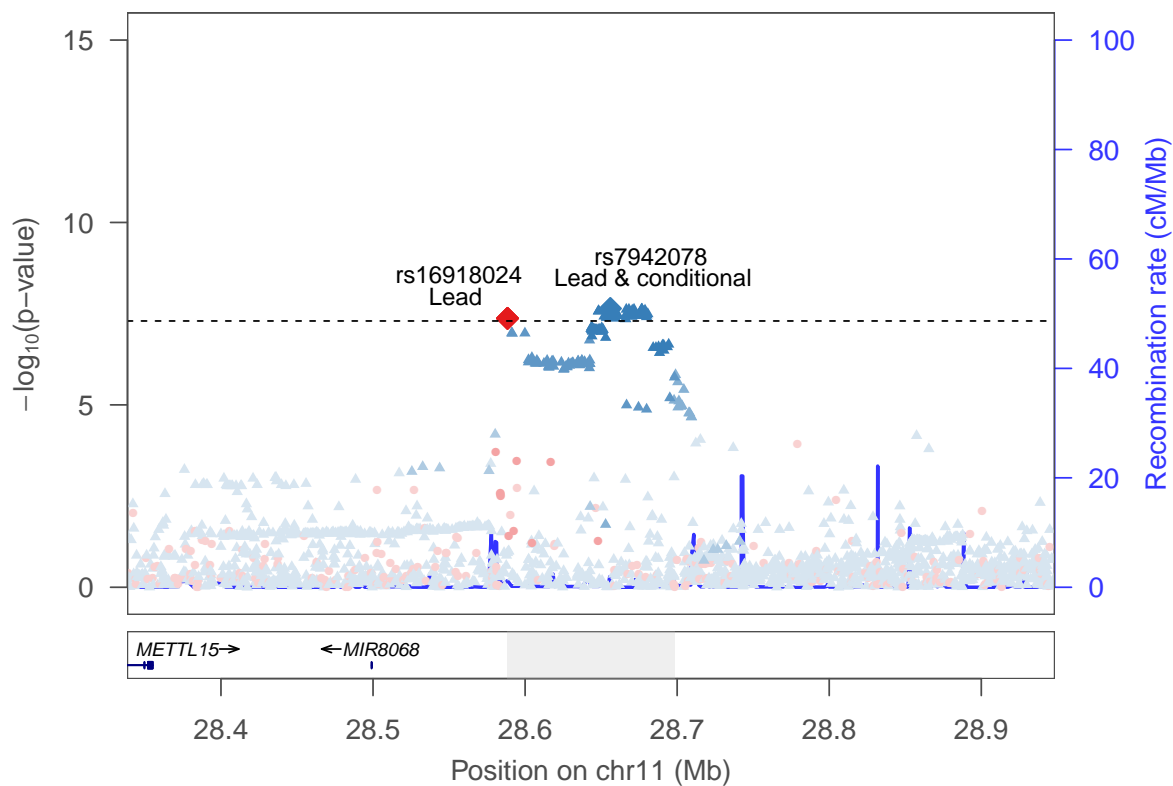

rs7942078 ▲  
rs16918024 ●

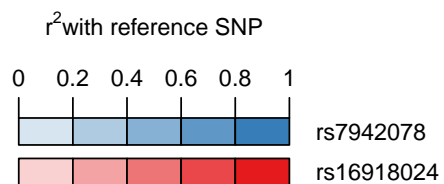



# Number of sexual partners: locus 68 [chr 11:112.827–112.913Mb]

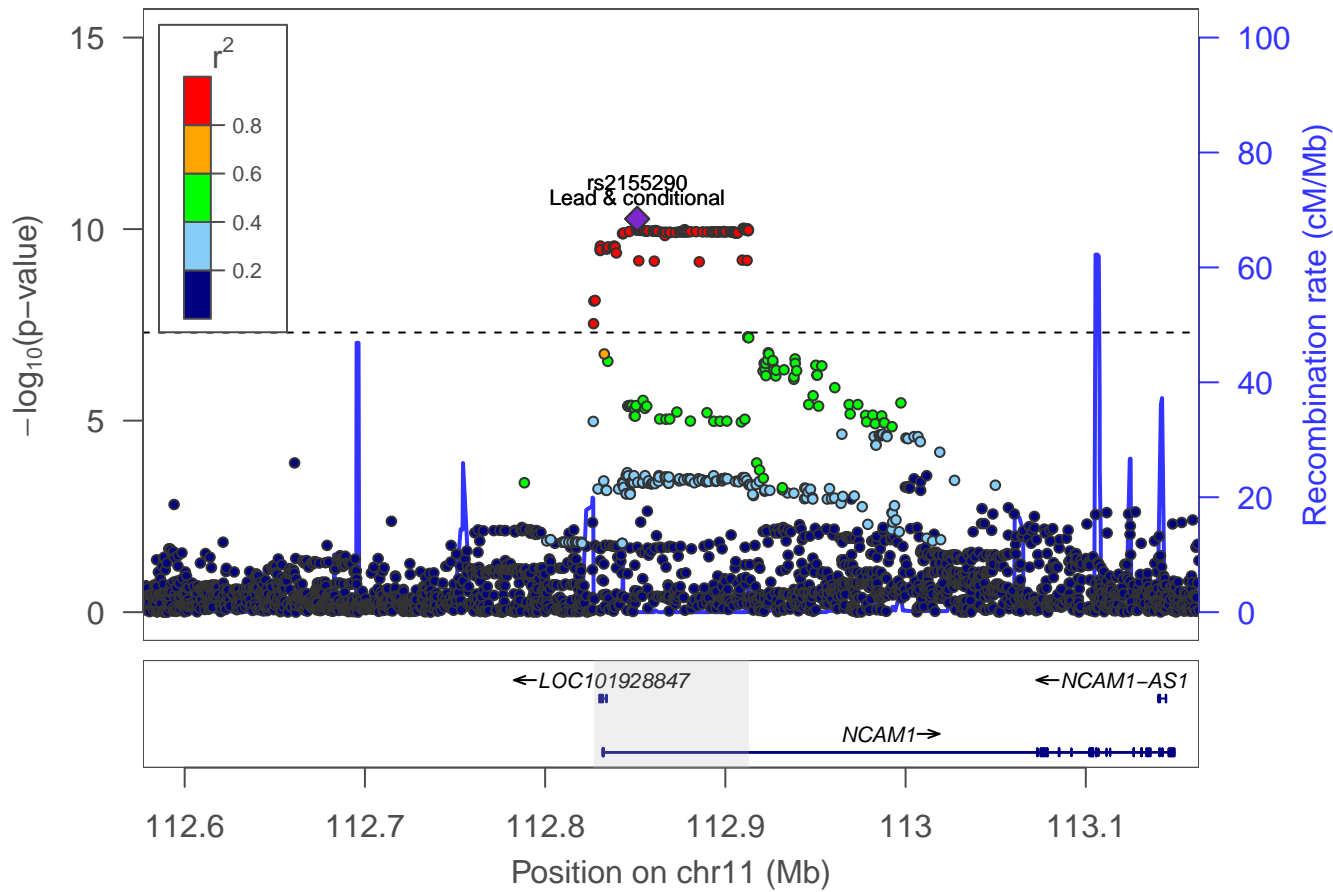

# Number of sexual partners: locus 69 [chr 12:16.311–16.329Mb]

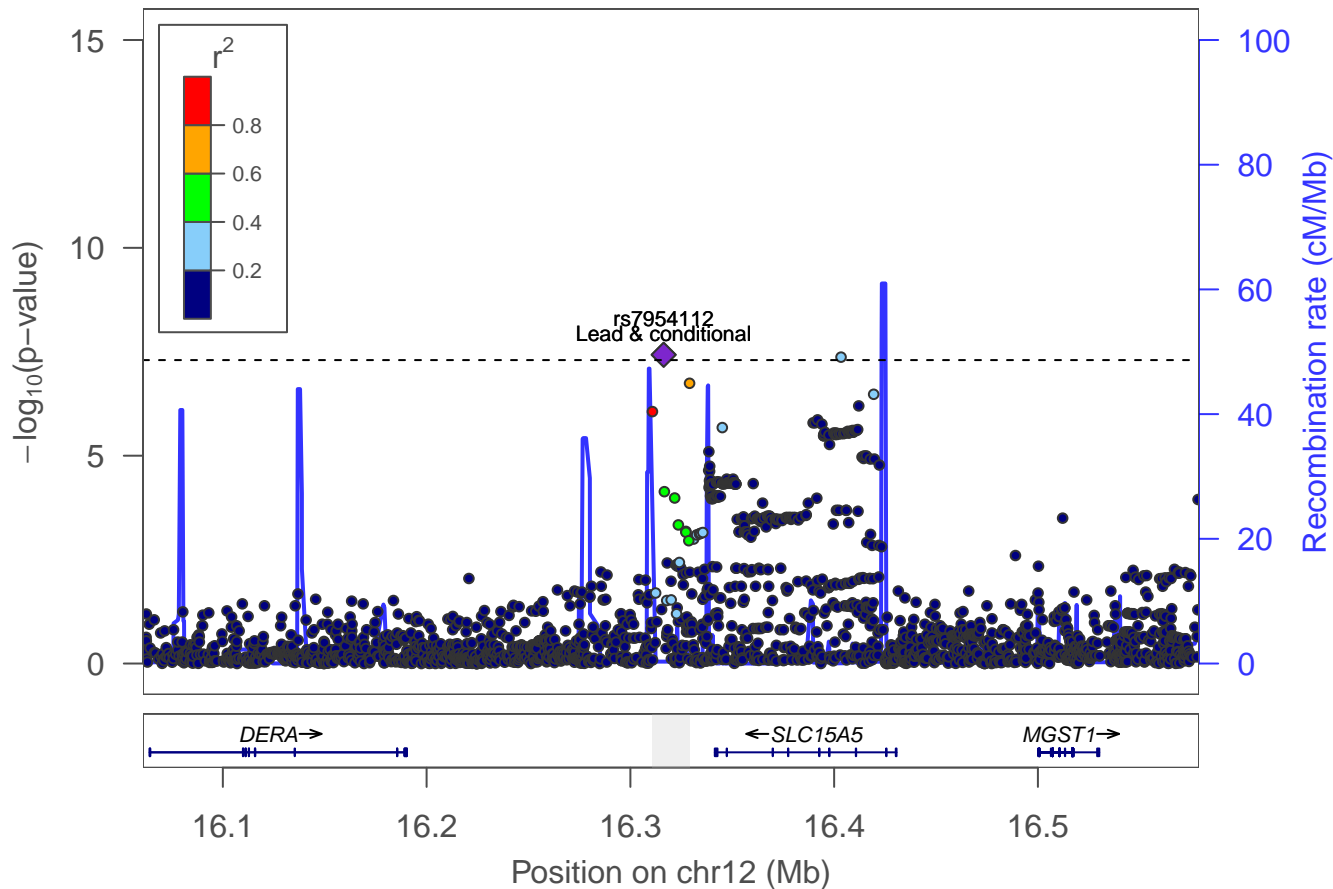

# Number of sexual partners: locus 70 [chr 12:102.395–102.865Mb]

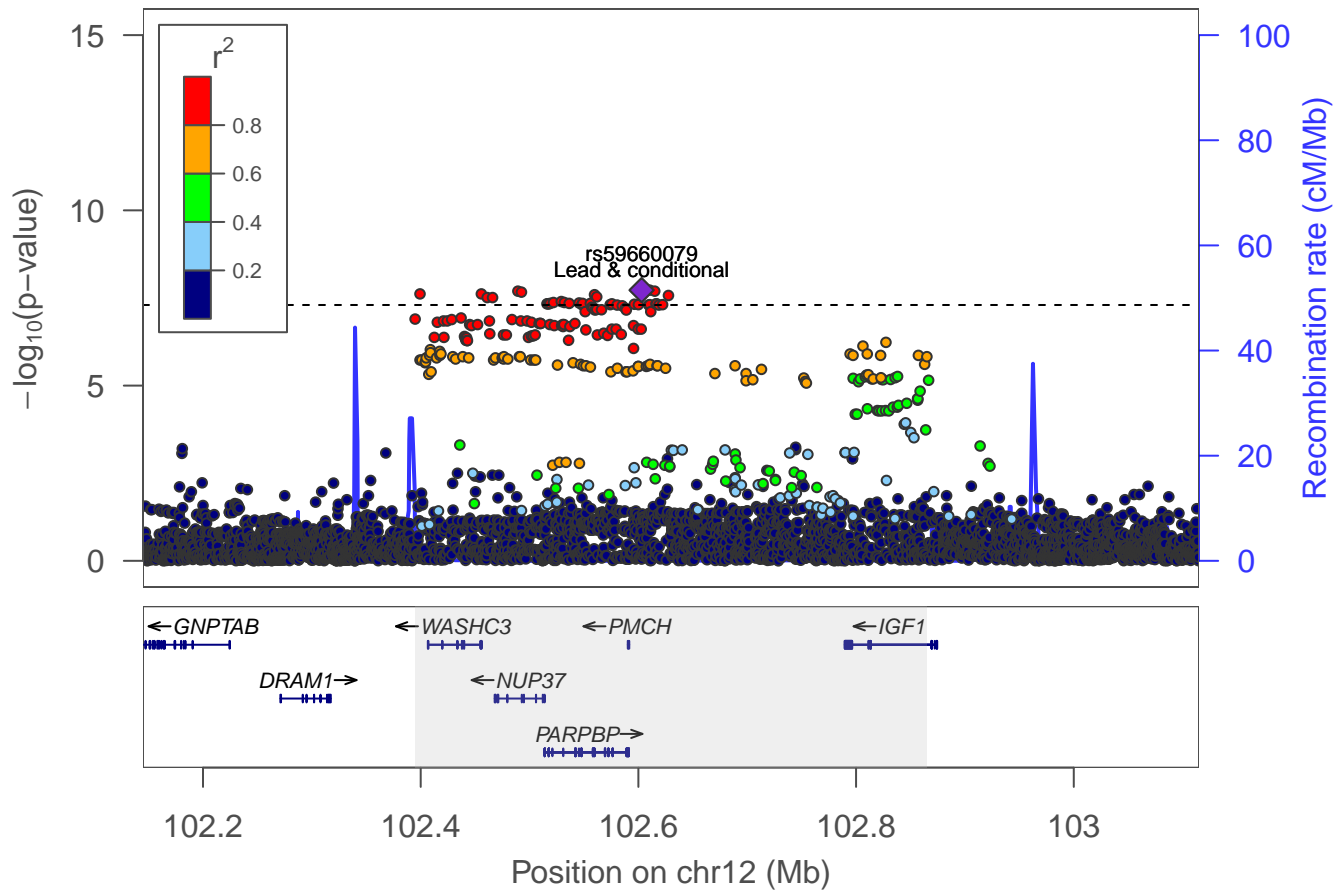

# Number of sexual partners: locus 71 [chr 12:120.036–120.206Mb]

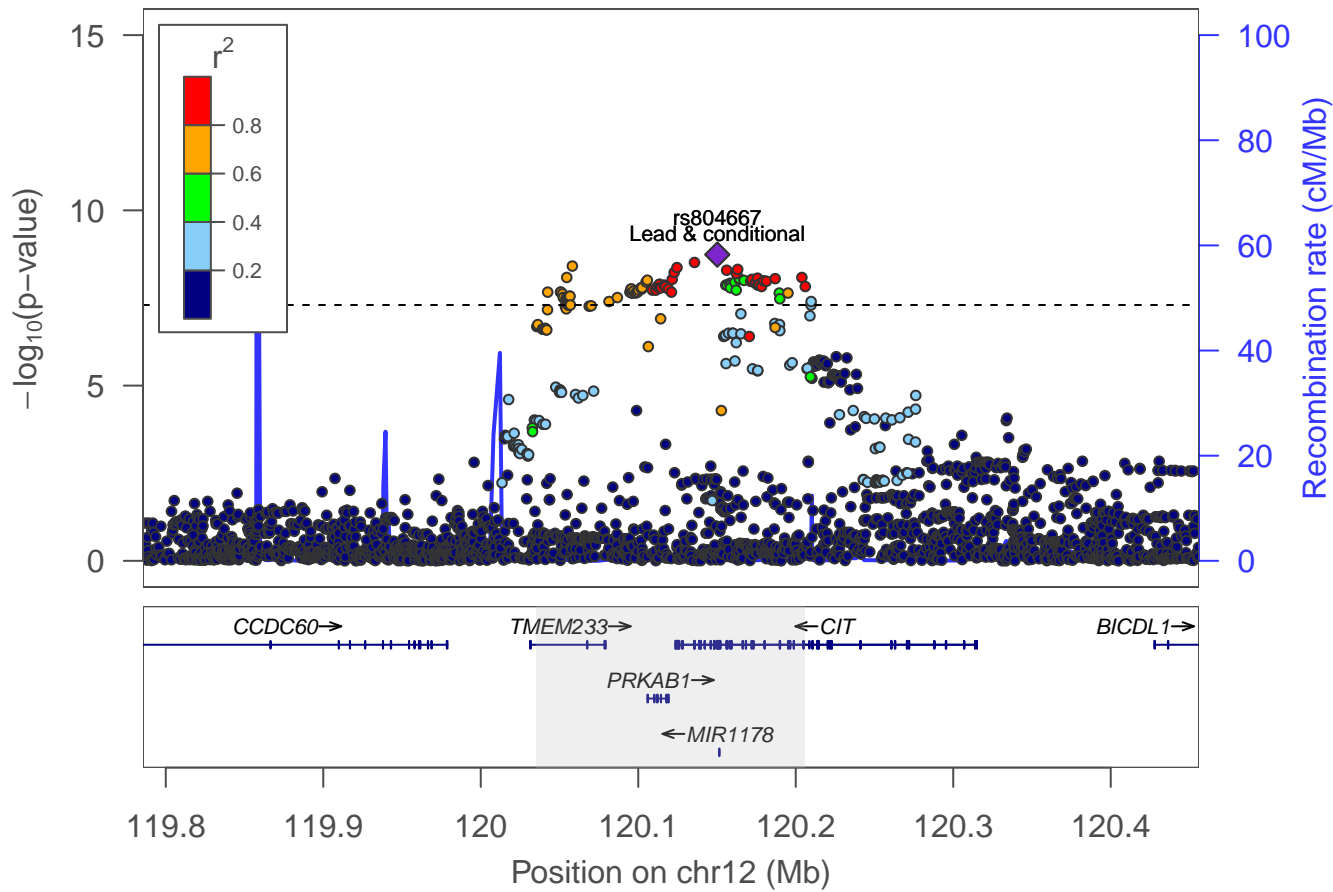

# Number of sexual partners: locus 72 [chr 13:59.631–59.647Mb]

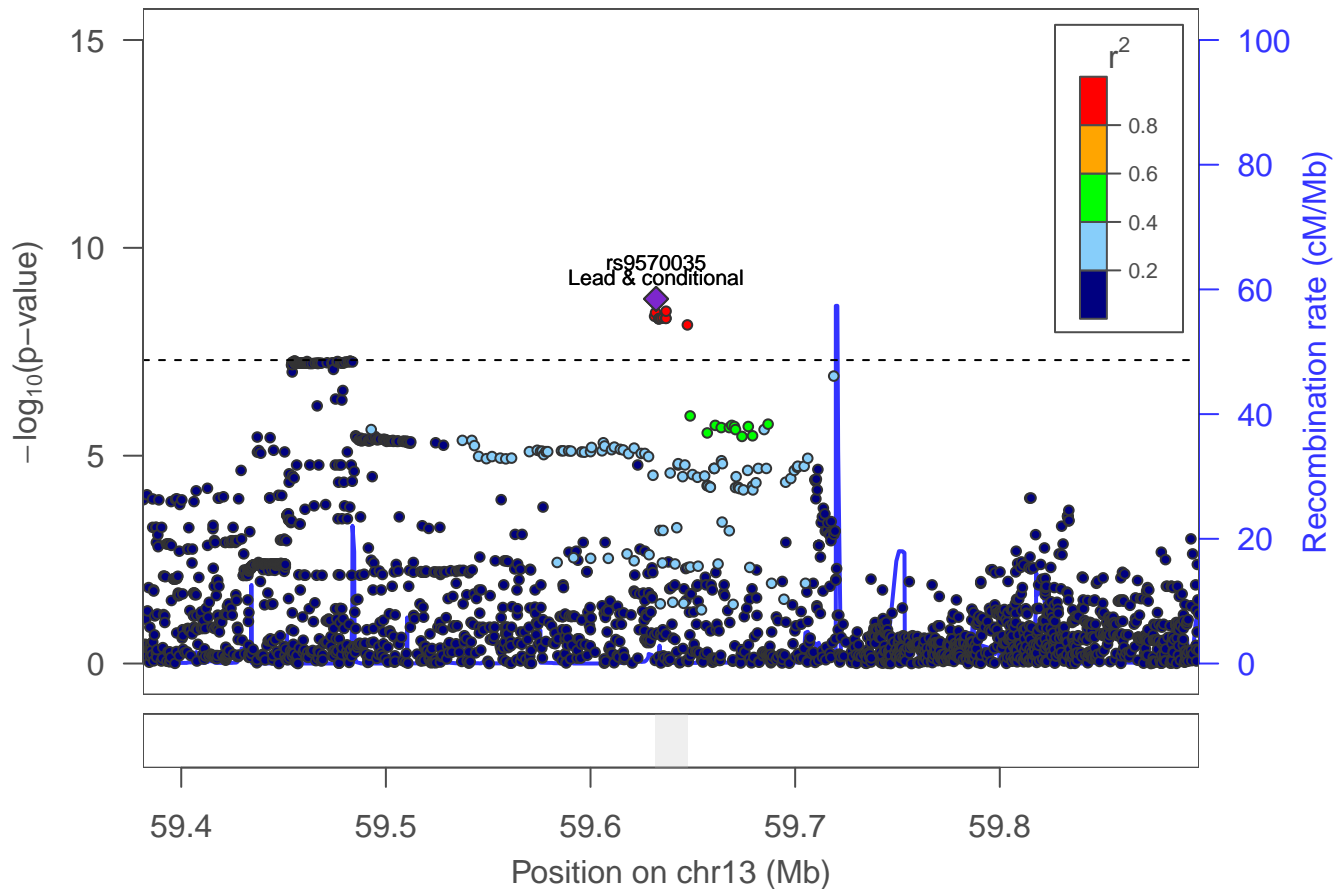

# Number of sexual partners: locus 73 [chr 14:28.256–28.397Mb]

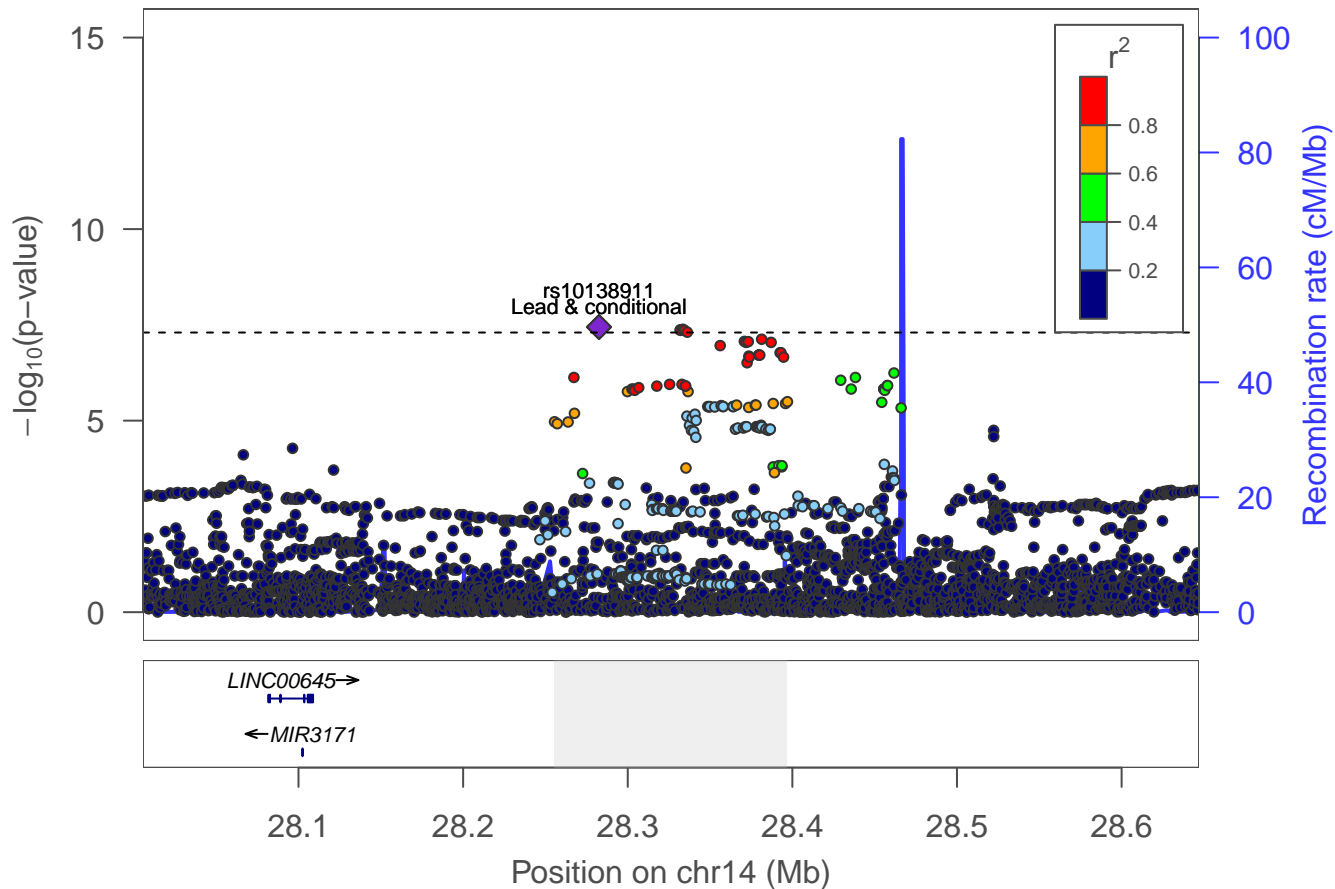

# Number of sexual partners: locus 74 [chr 14:40.911–41.053Mb]

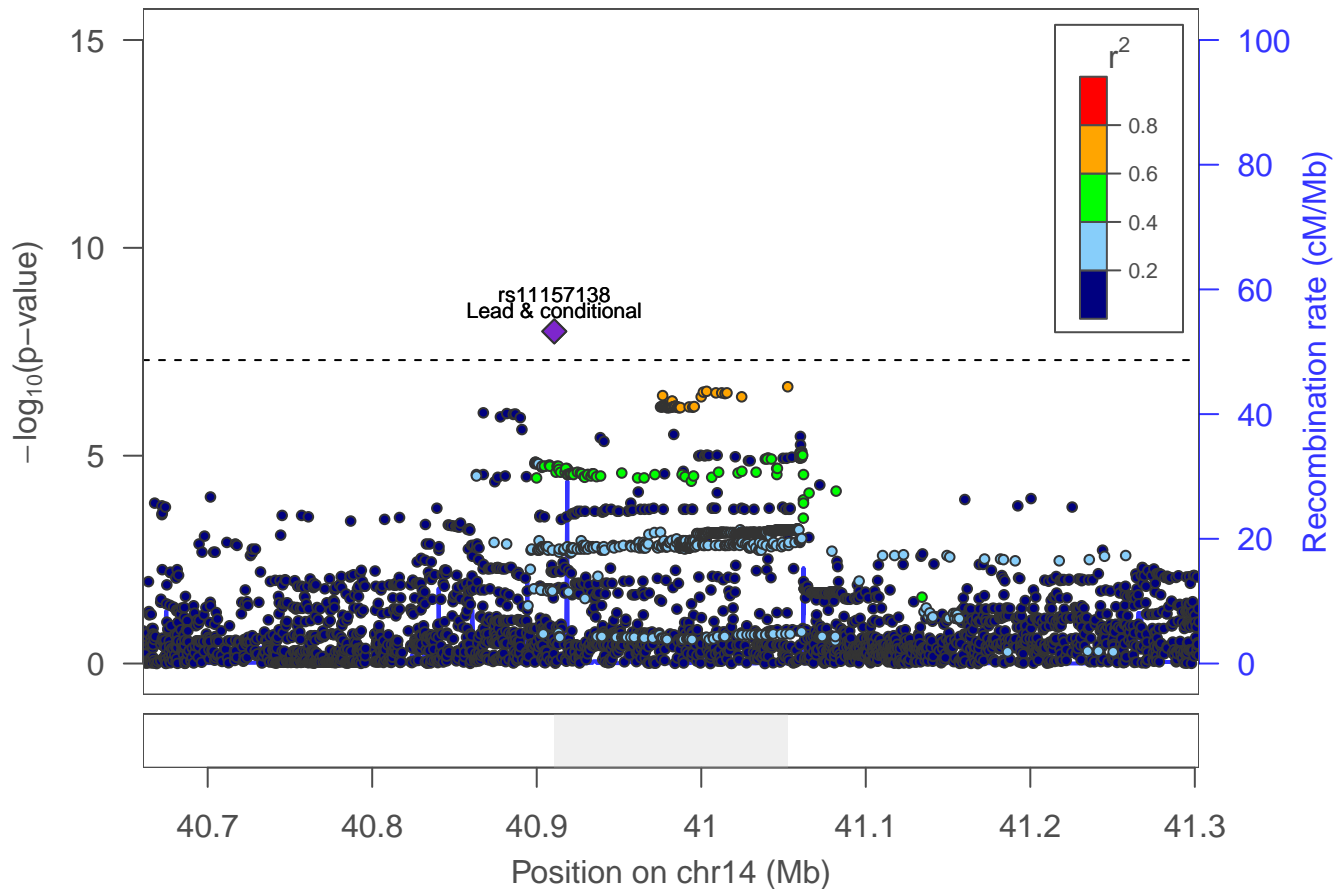

# Number of sexual partners: Locus 75 [chr 14: 98.533–98.750Mb]

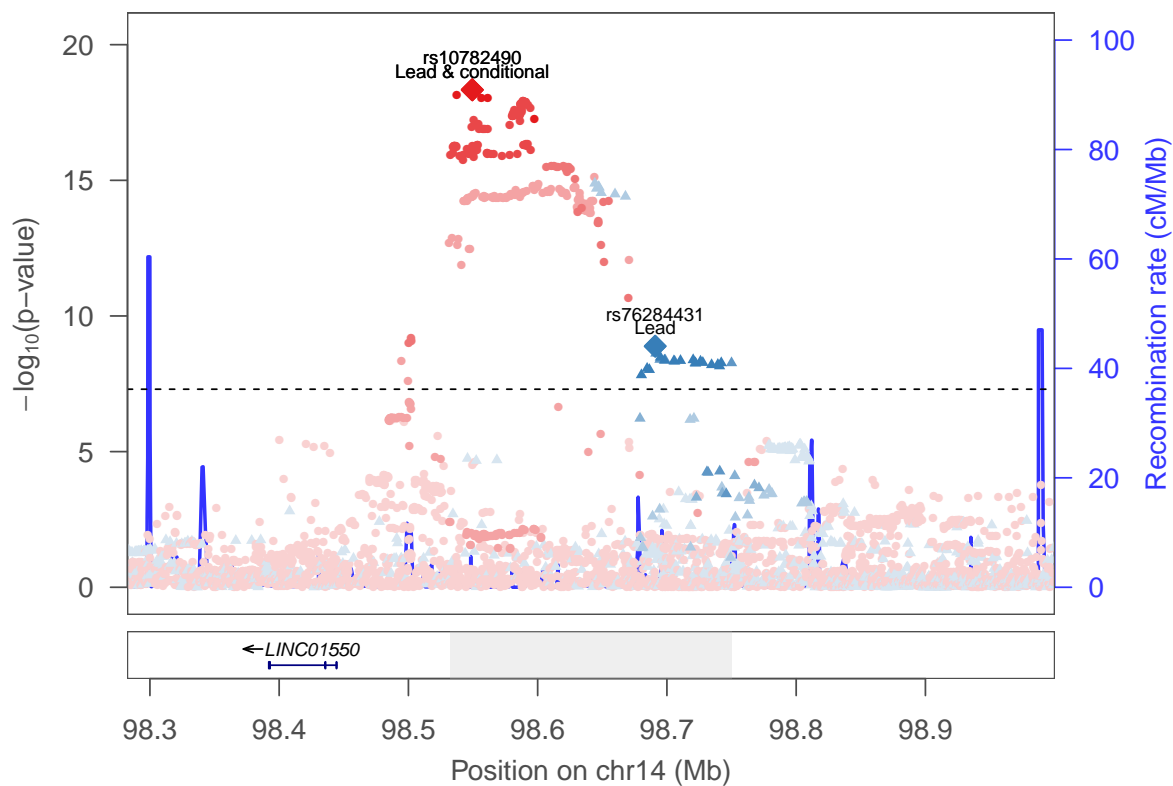

rs76284431 ▲  
rs10782490 ●

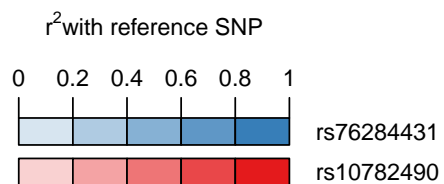



# Number of sexual partners: locus 76 [chr 14:103.782–103.813Mb]

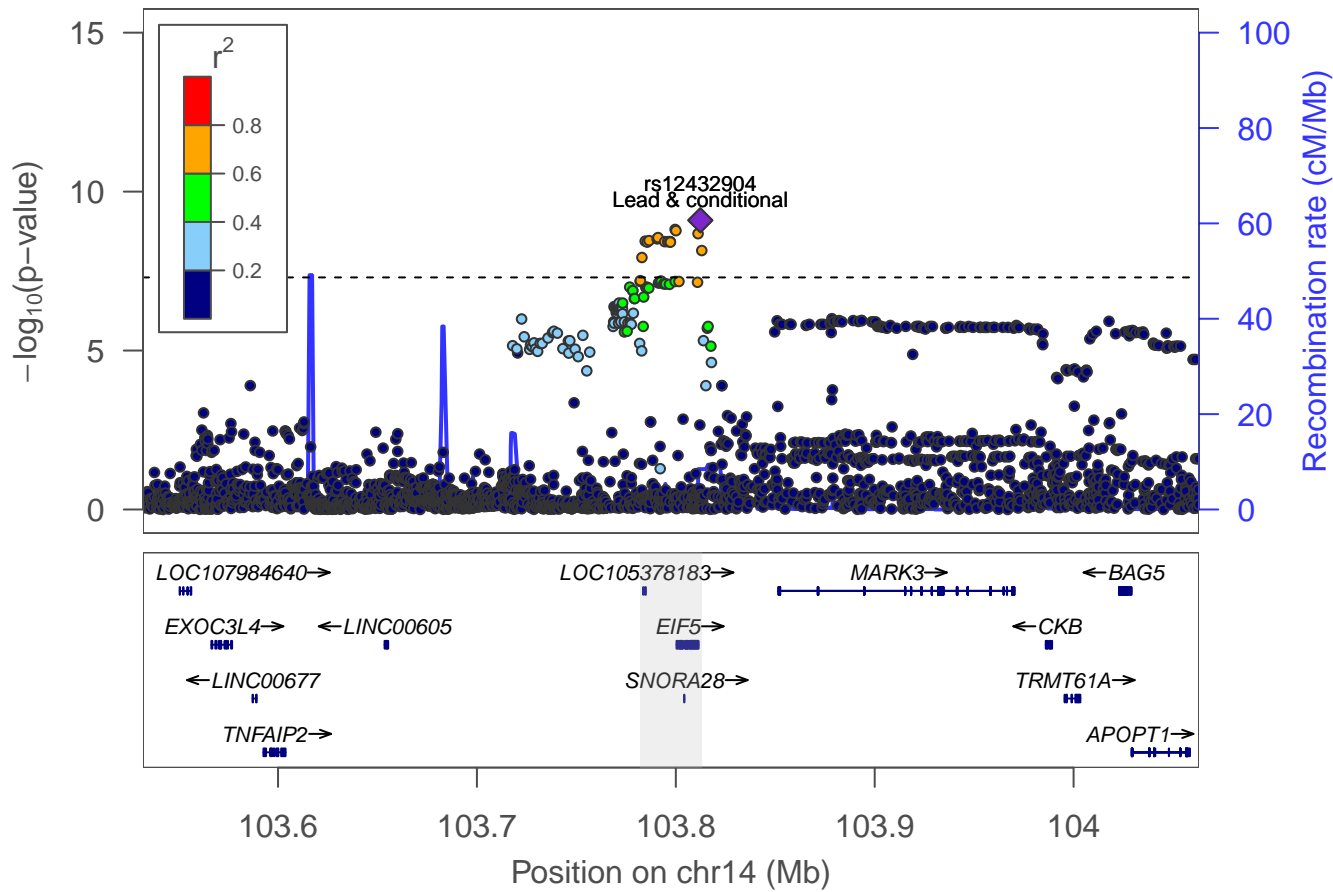

# Number of sexual partners: locus 77 [chr 14:104.095–104.338Mb]

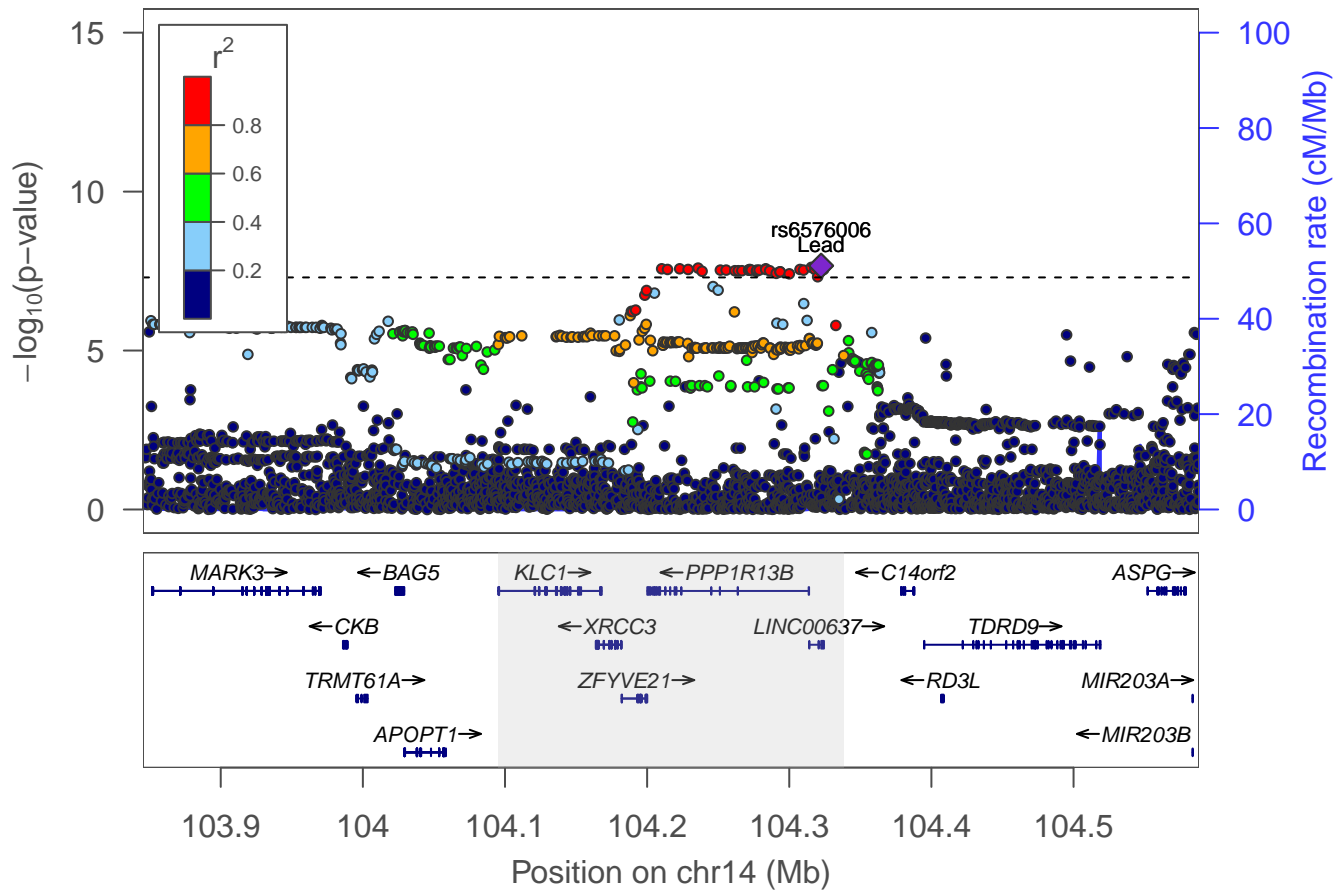

# Number of sexual partners: locus 78 [chr 14:104.610–104.620Mb]

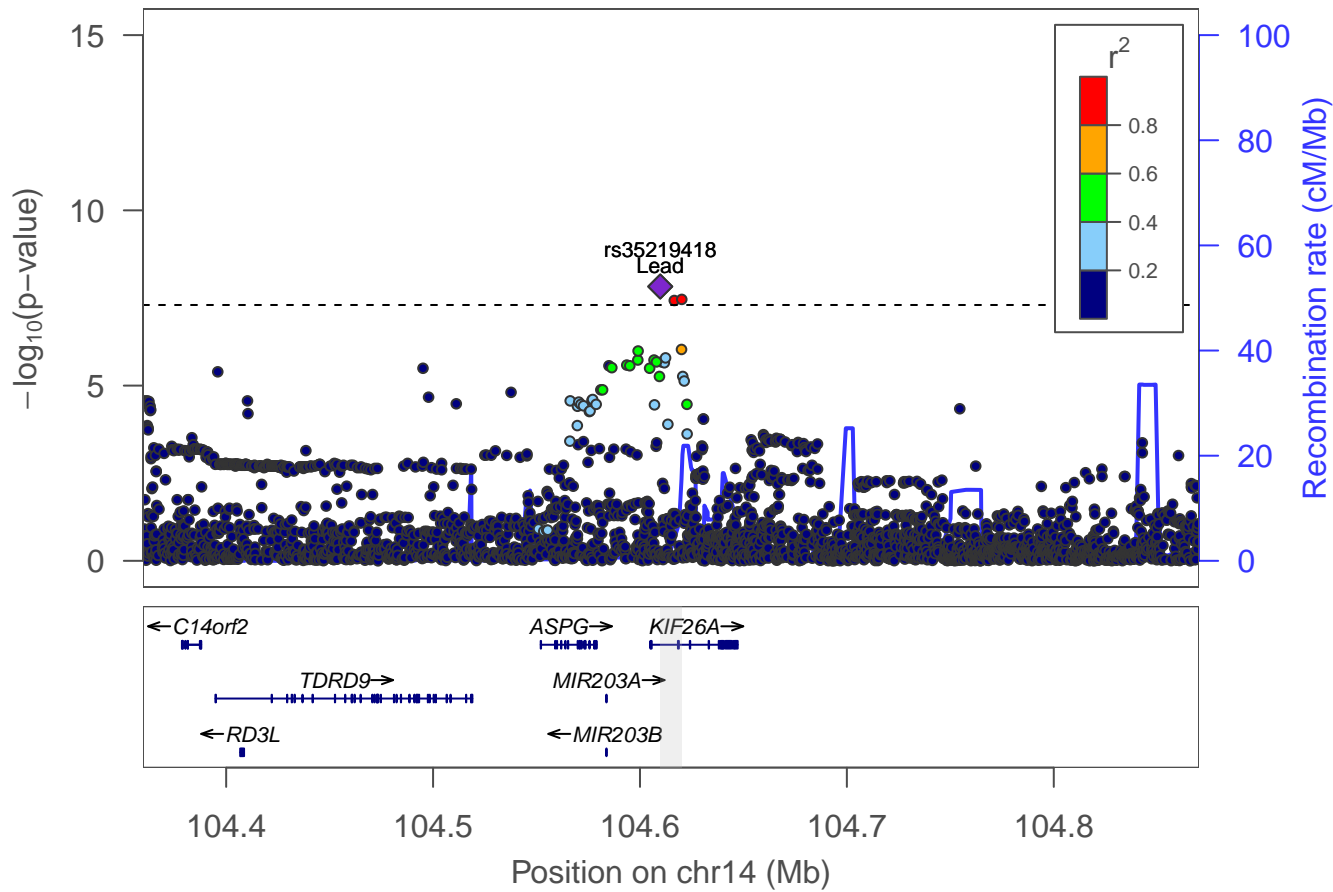

# Number of sexual partners: locus 79 [chr 15:47.613–47.685Mb]

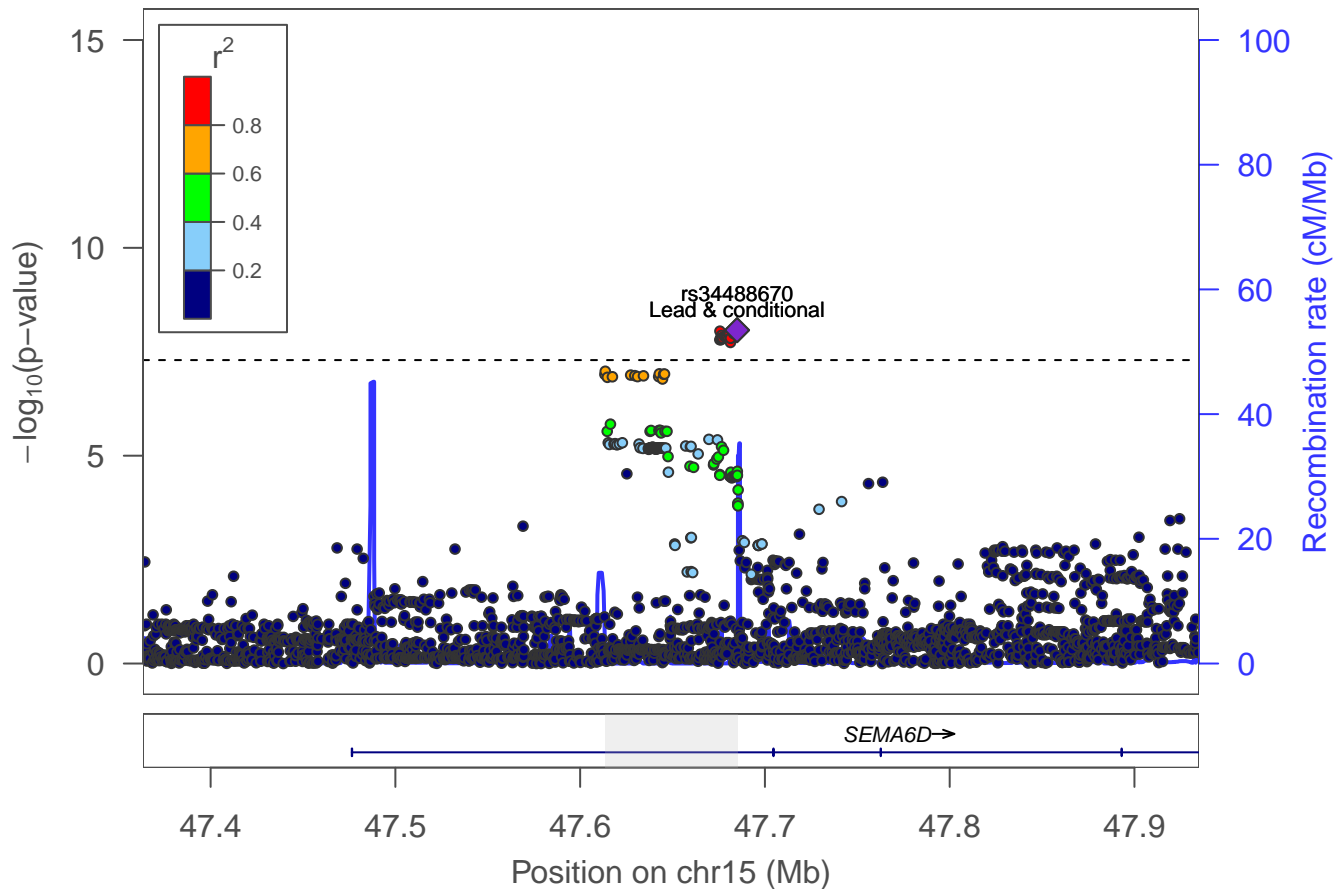

# Number of sexual partners: locus 80 [chr 15:91.417–91.429Mb]

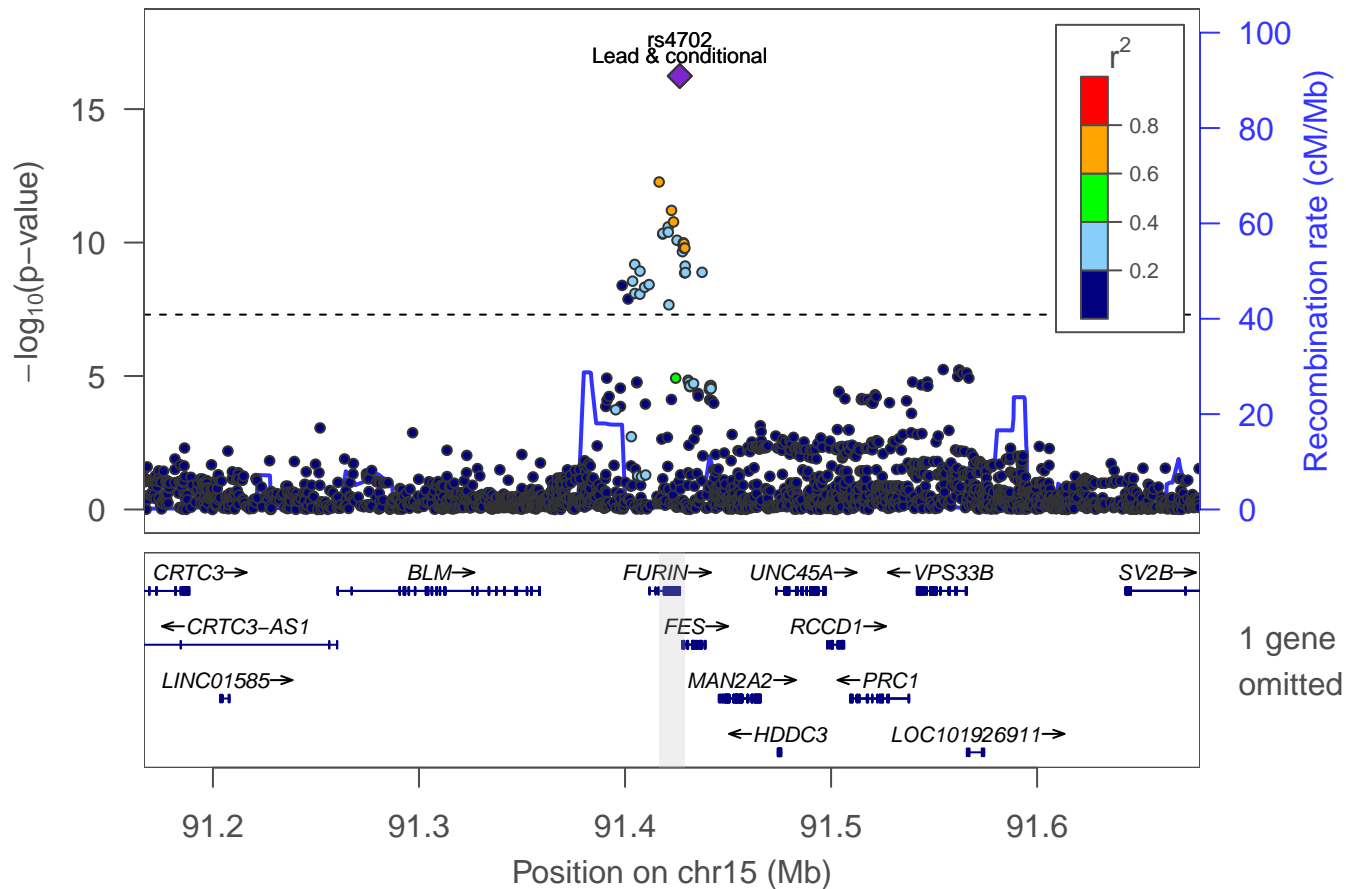

# Number of sexual partners: locus 81 [chr 16:13.748–13.773Mb]

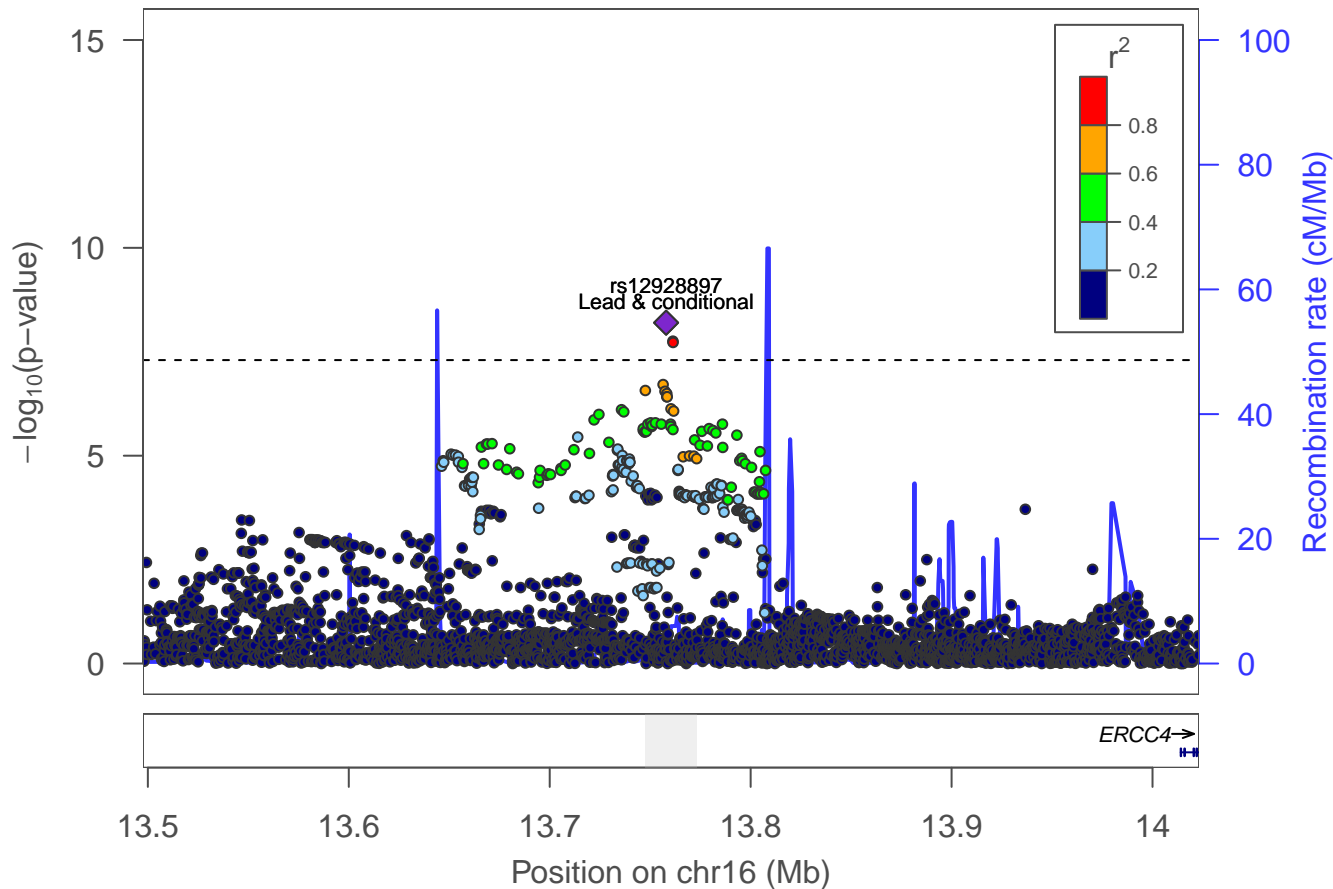

# Number of sexual partners: Locus 82 [chr 16: 17.562–17.621Mb]

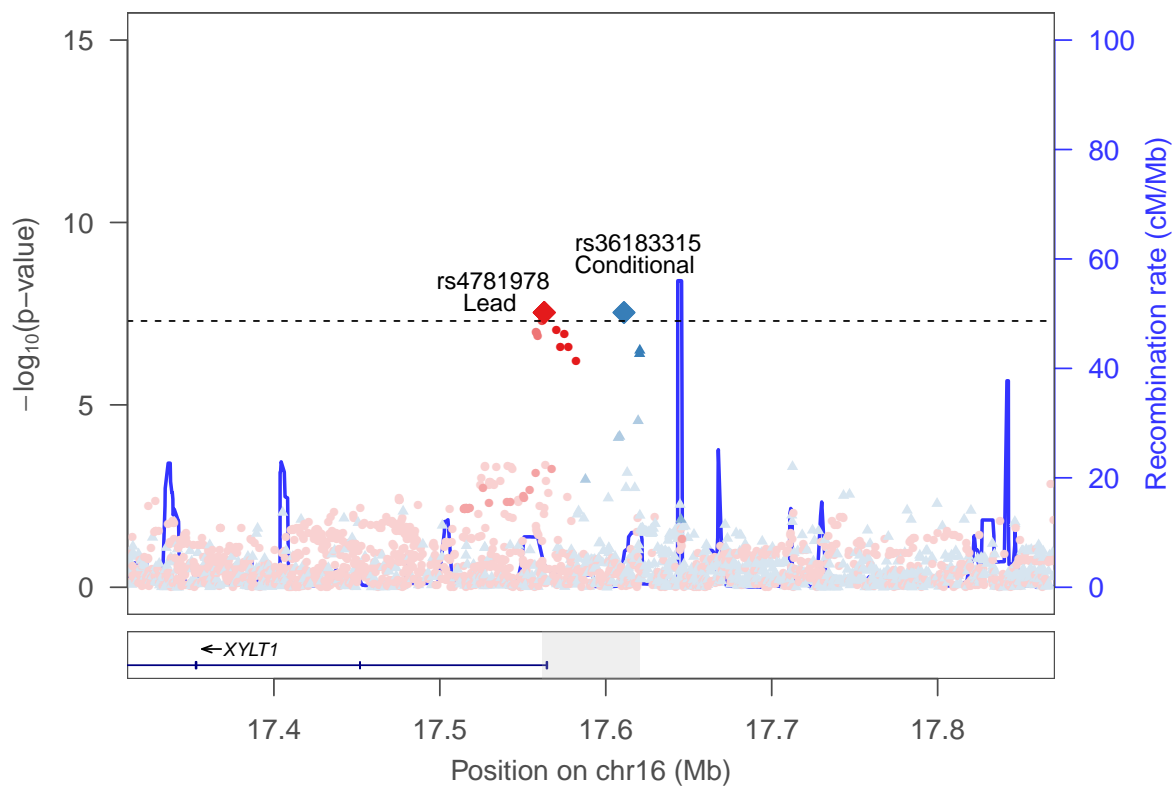

rs36183315 ▲  
rs4781978 ●

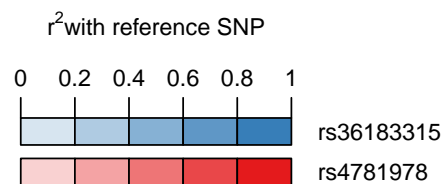

# Number of sexual partners: locus 83 [chr 16:49.592–49.627Mb]

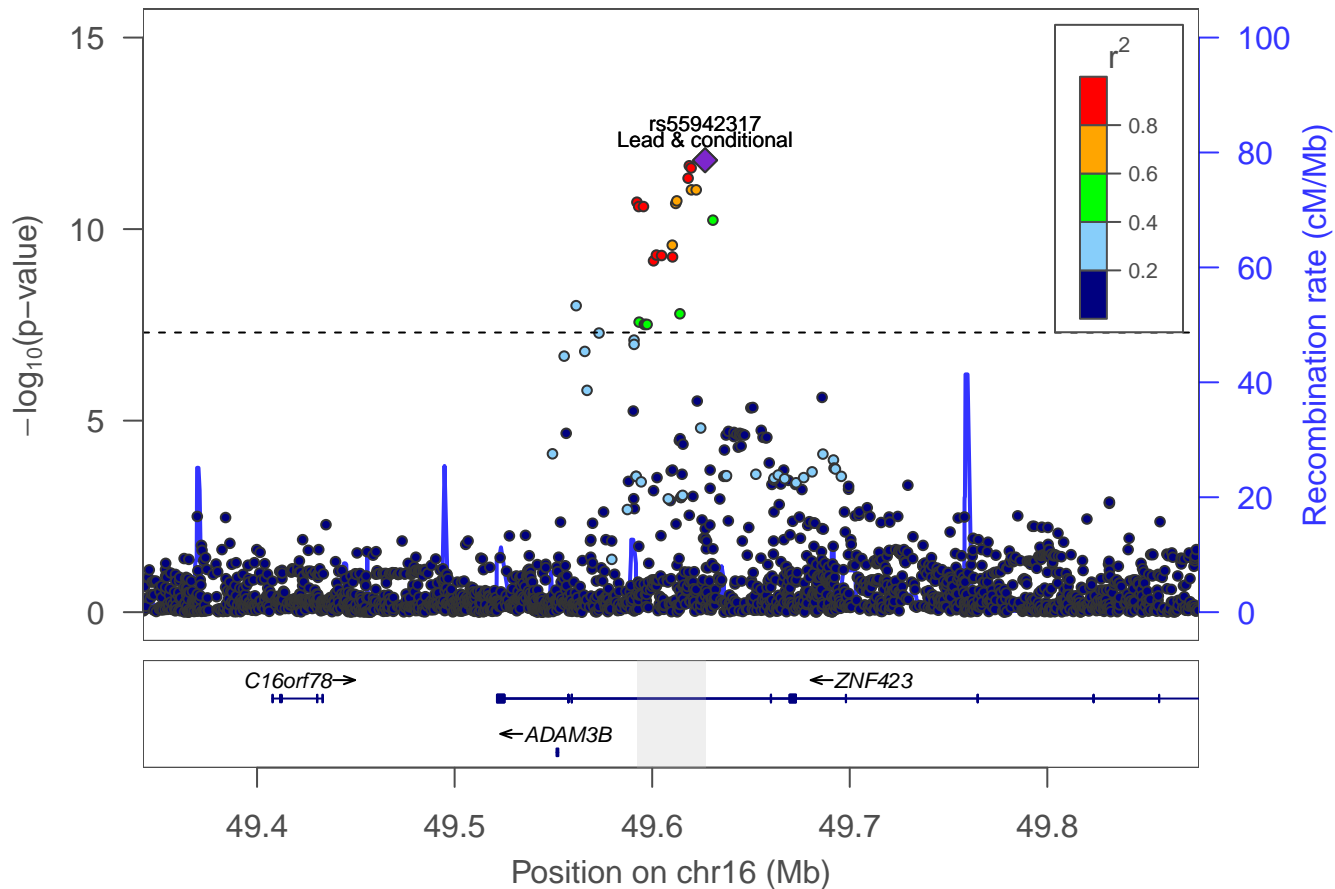



# Number of sexual partners: locus 84 [chr 16:53.799–53.845Mb]

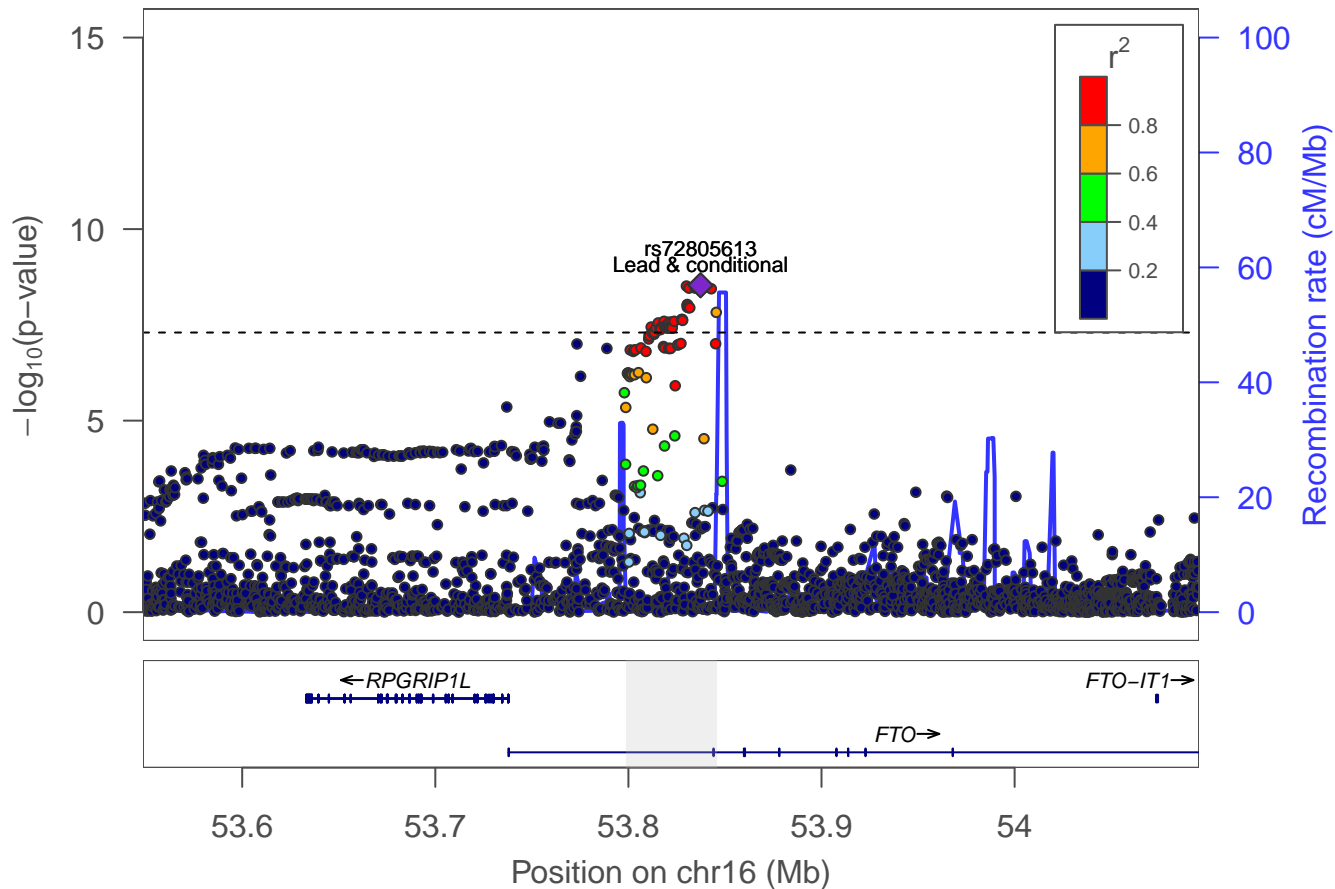

# Number of sexual partners: locus 85 [chr 16:71.580–72.025Mb]

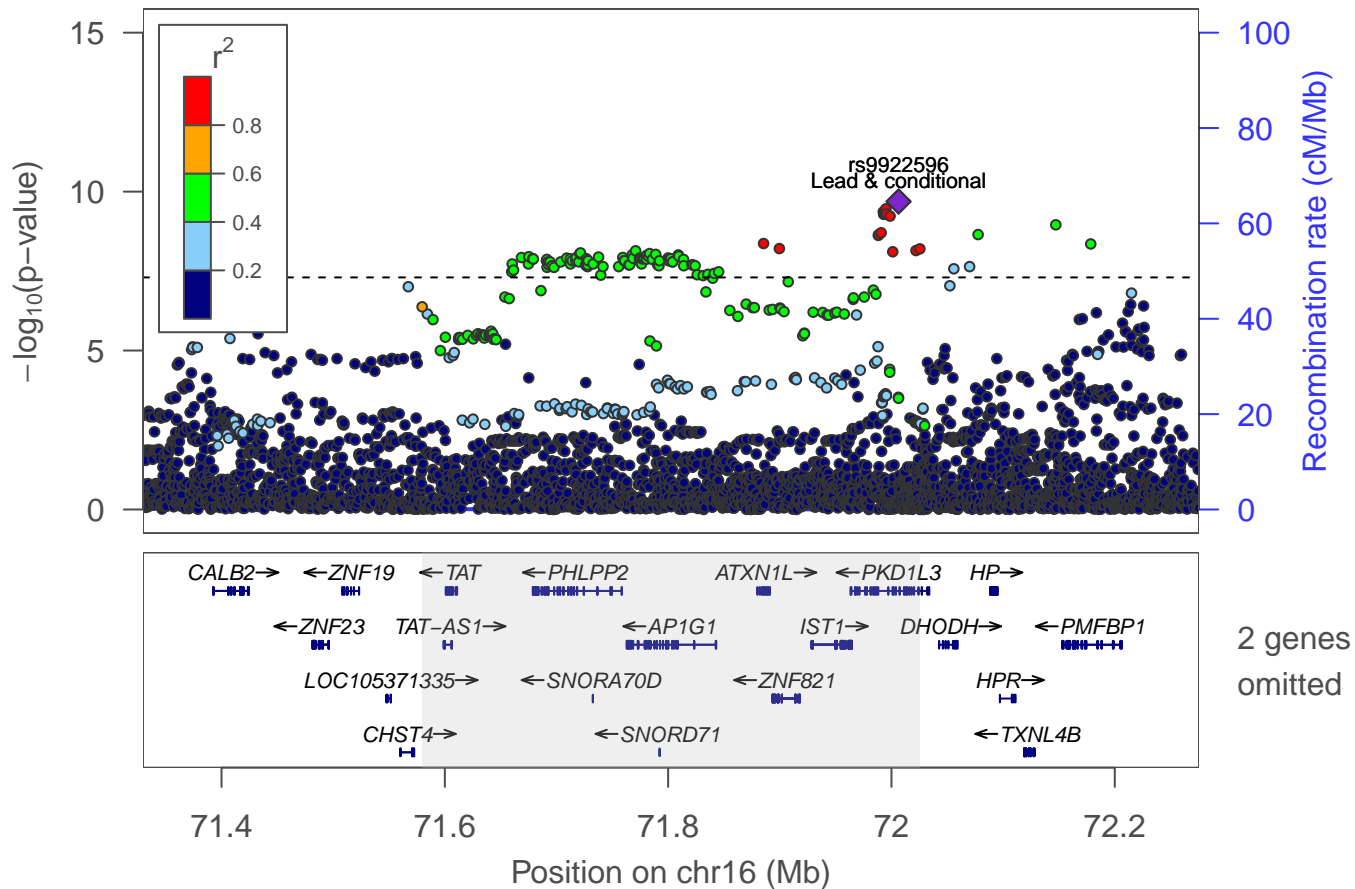

# Number of sexual partners: locus 86 [chr 16:72.928–72.934Mb]

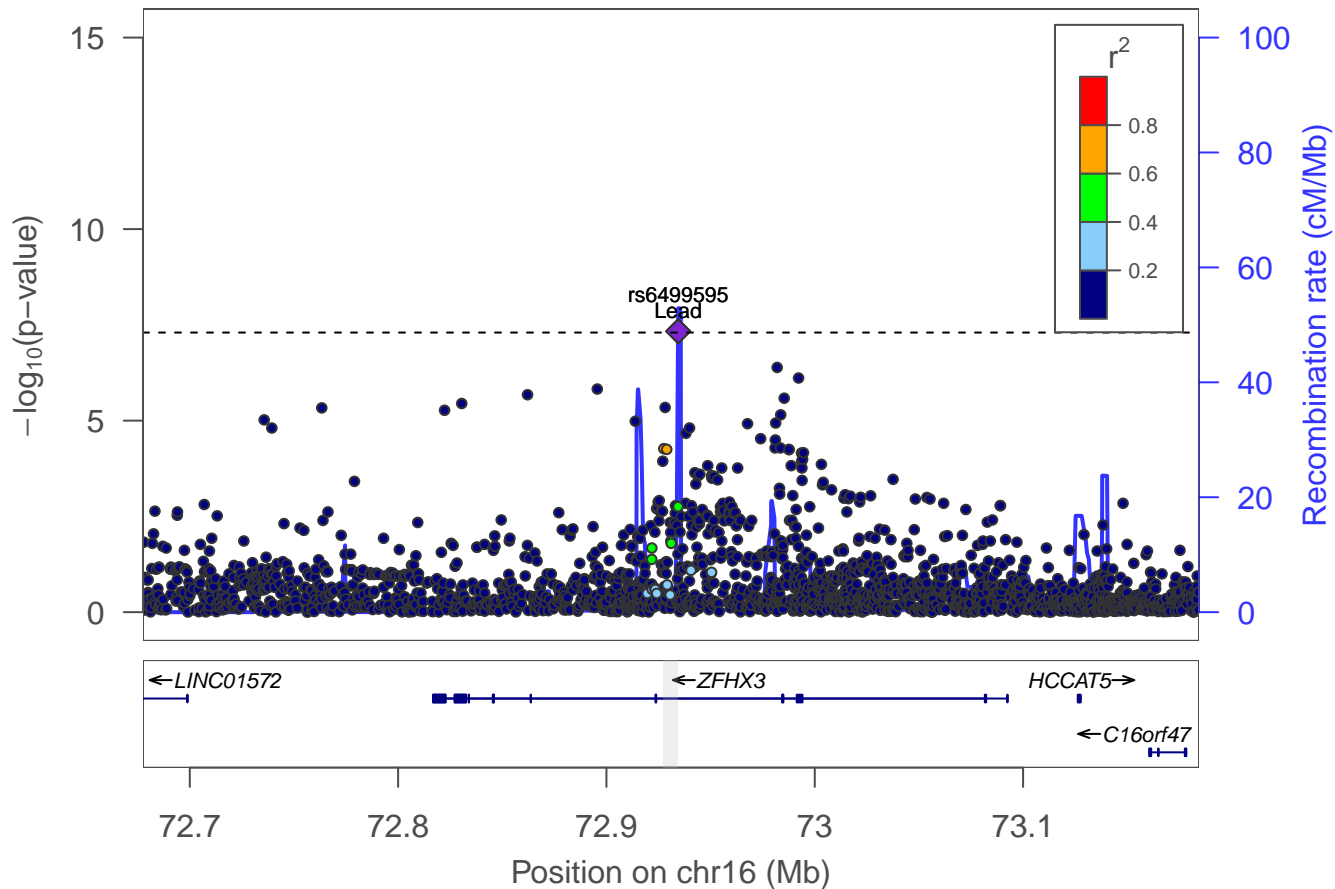

# Number of sexual partners: locus 87 [chr 16:77.054–77.157Mb]

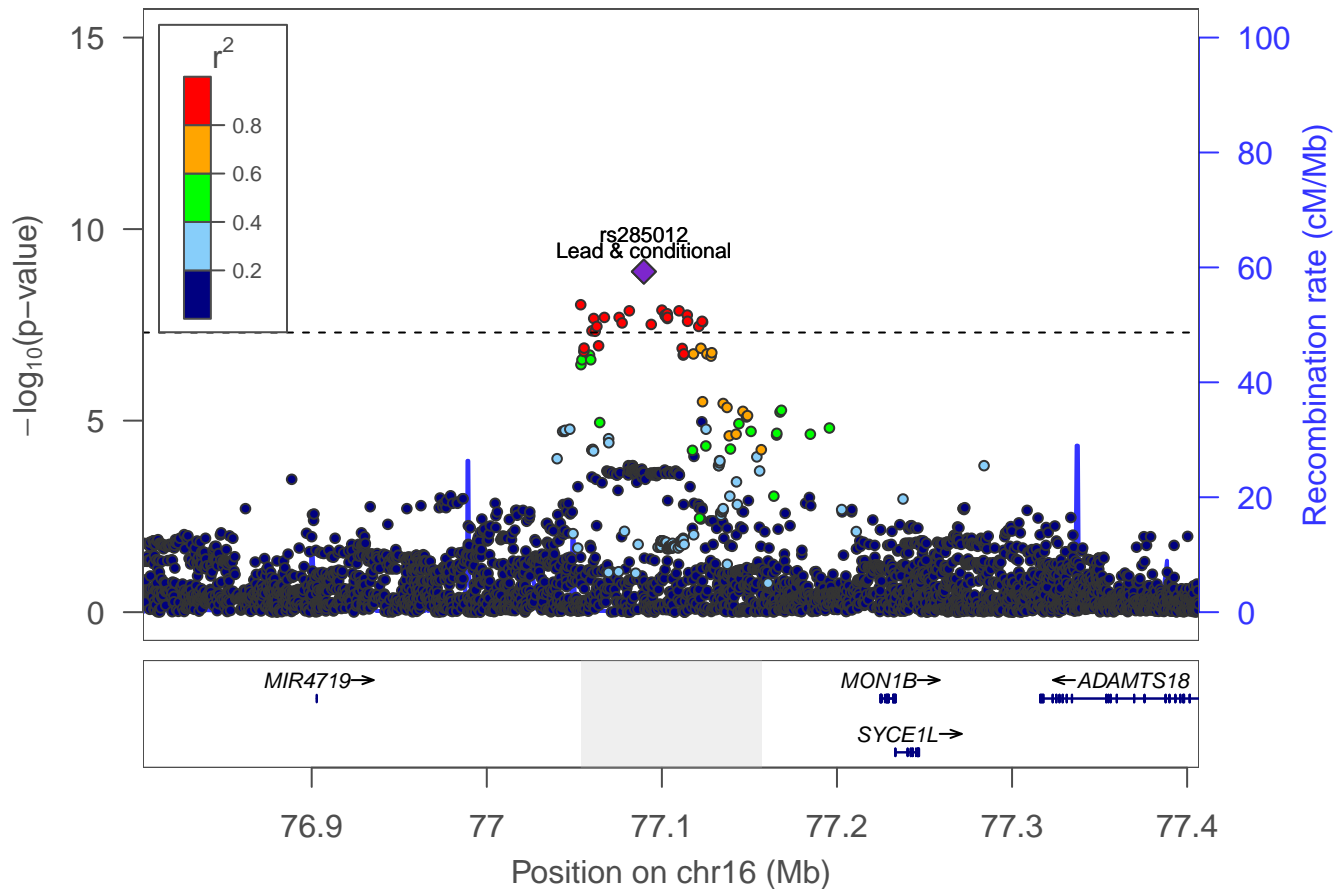

# Number of sexual partners: locus 88 [chr 17:2.230–2.248Mb]

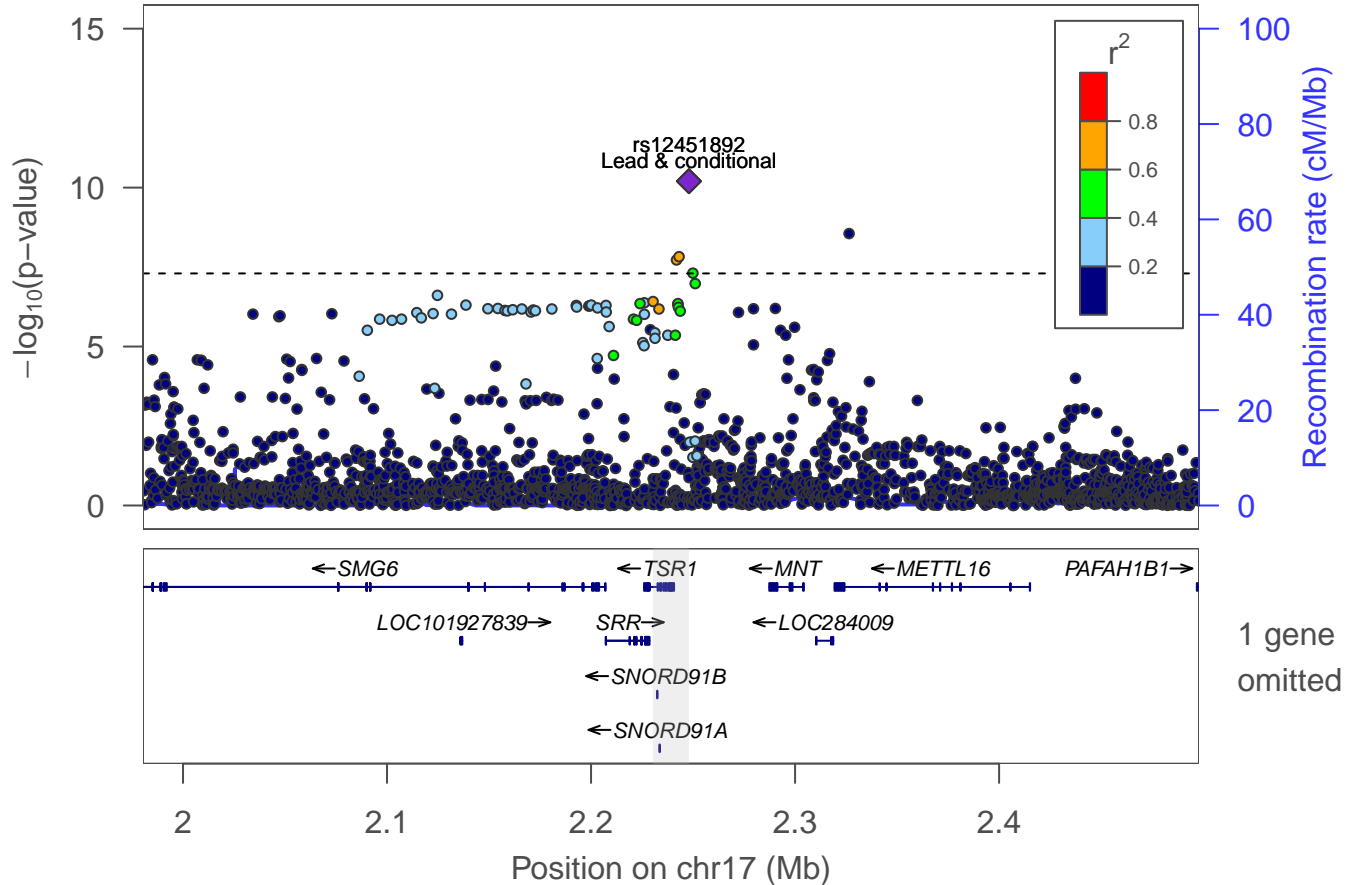

# Number of sexual partners: locus 89 [chr 17:43.463–44.866Mb]

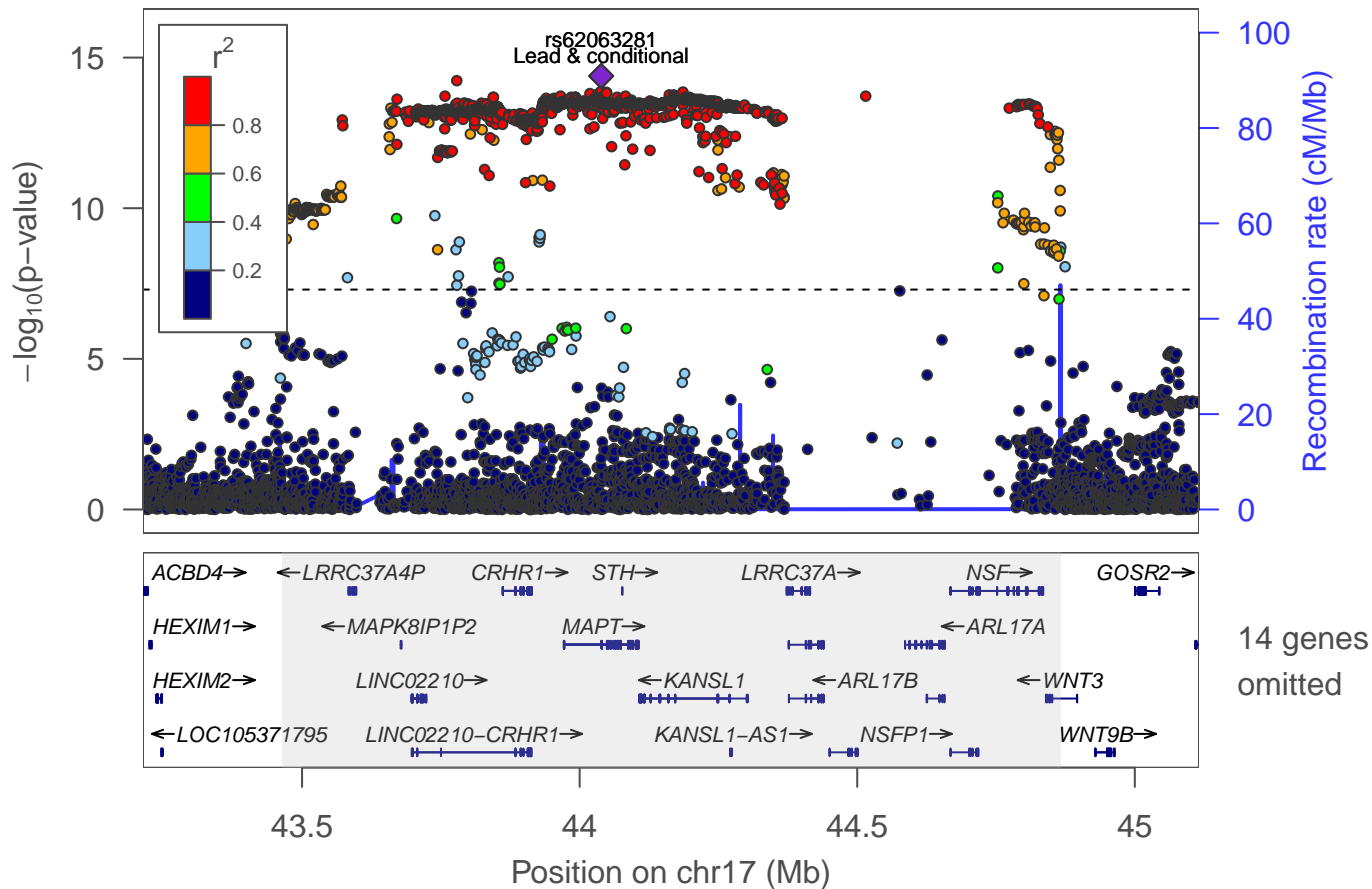

# Number of sexual partners: locus 90 [chr 17:65.825–66.098Mb]

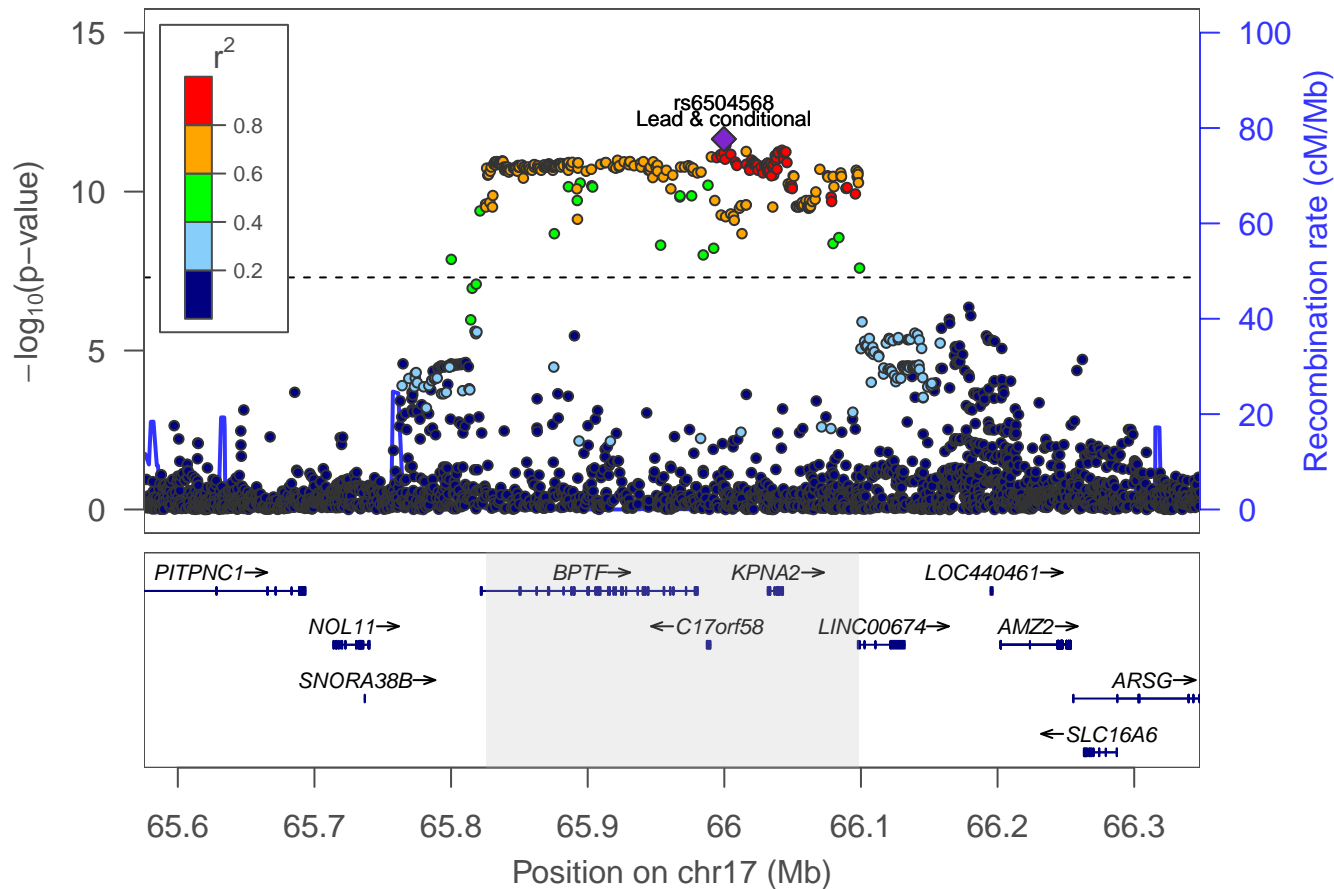

# Number of sexual partners: locus 91 [chr 18:40.324–40.324Mb]

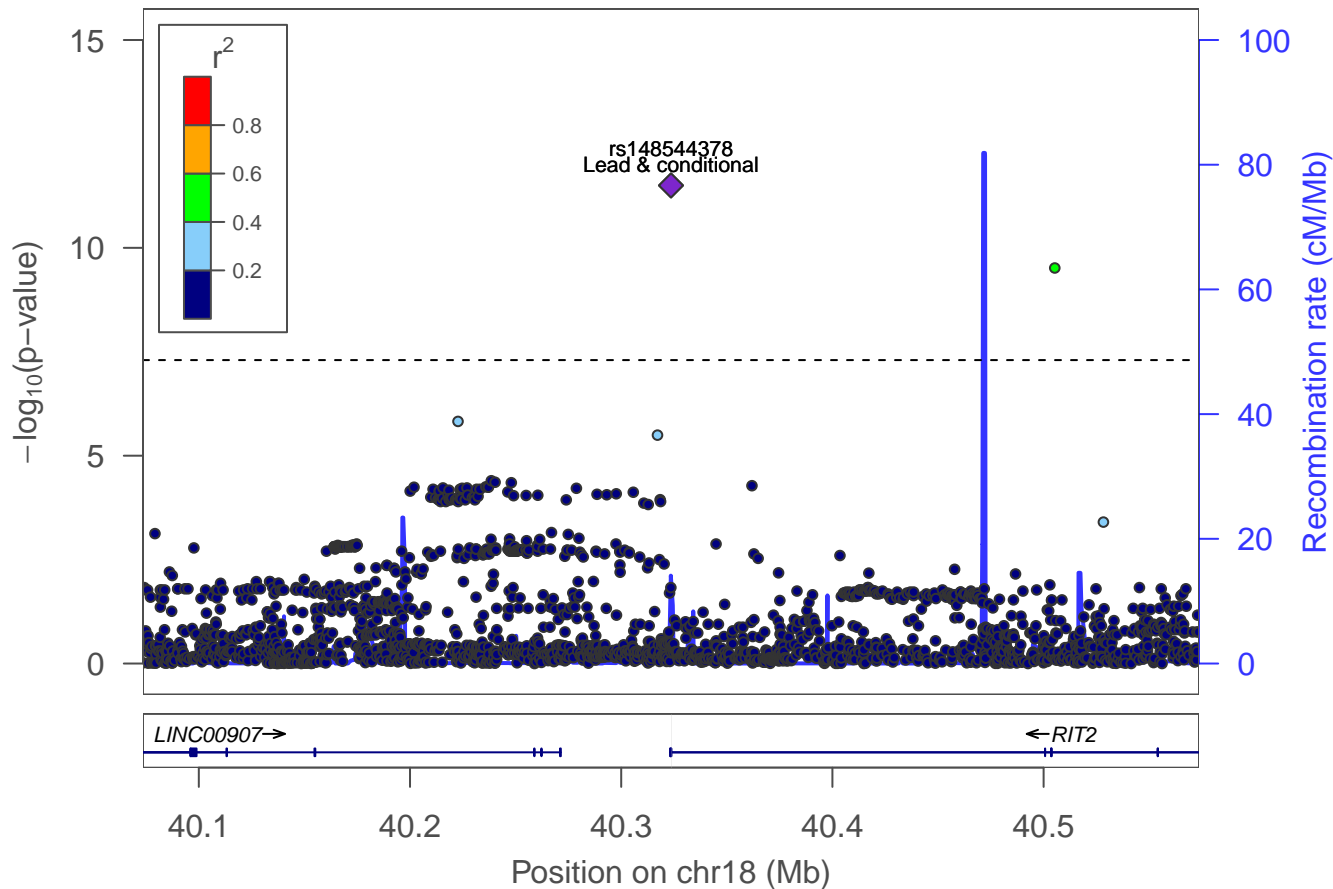



# Number of sexual partners: locus 92 [chr 18:41.660–42.183Mb]

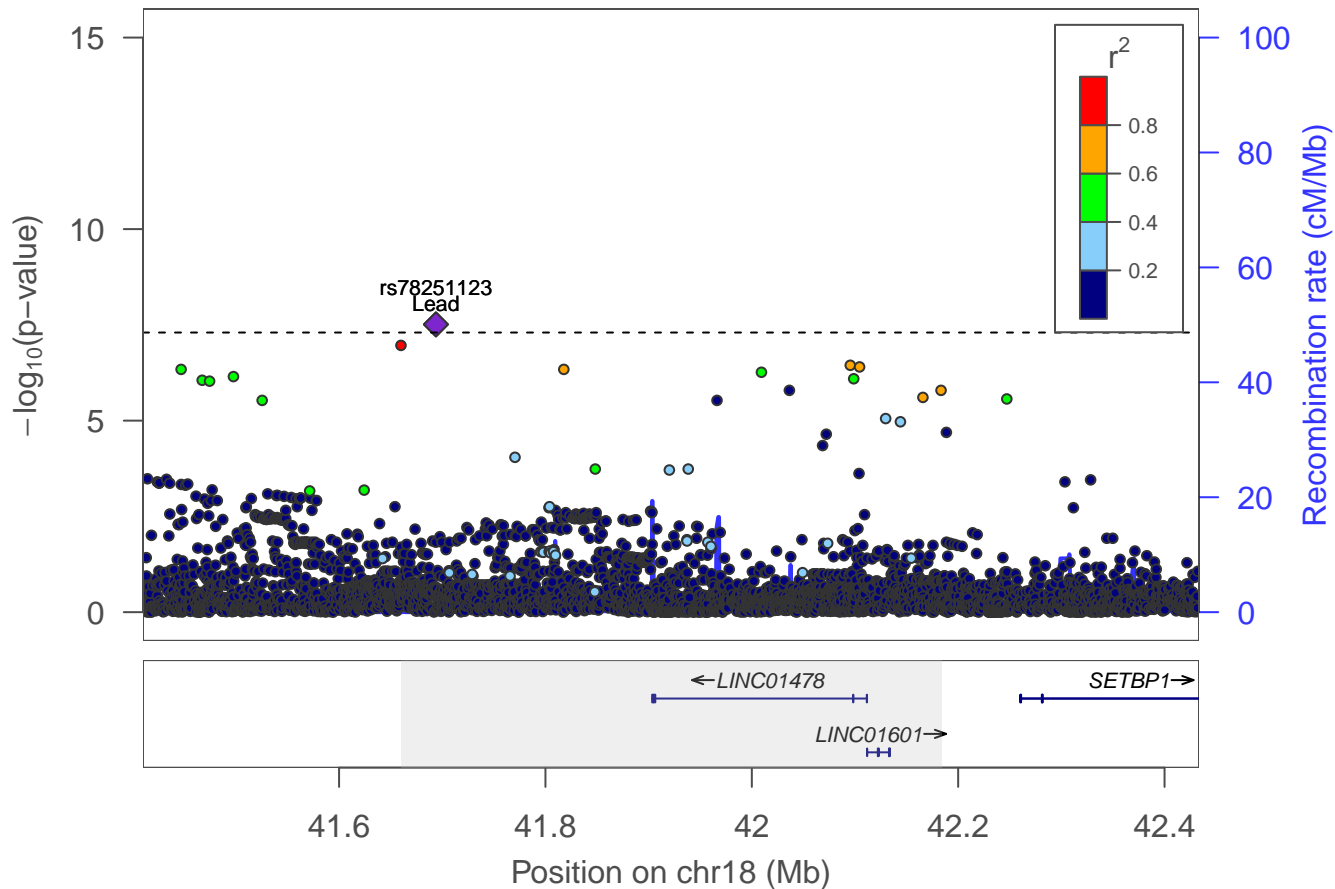

# Number of sexual partners: Locus 93 [chr 18: 49.966–50.026Mb]

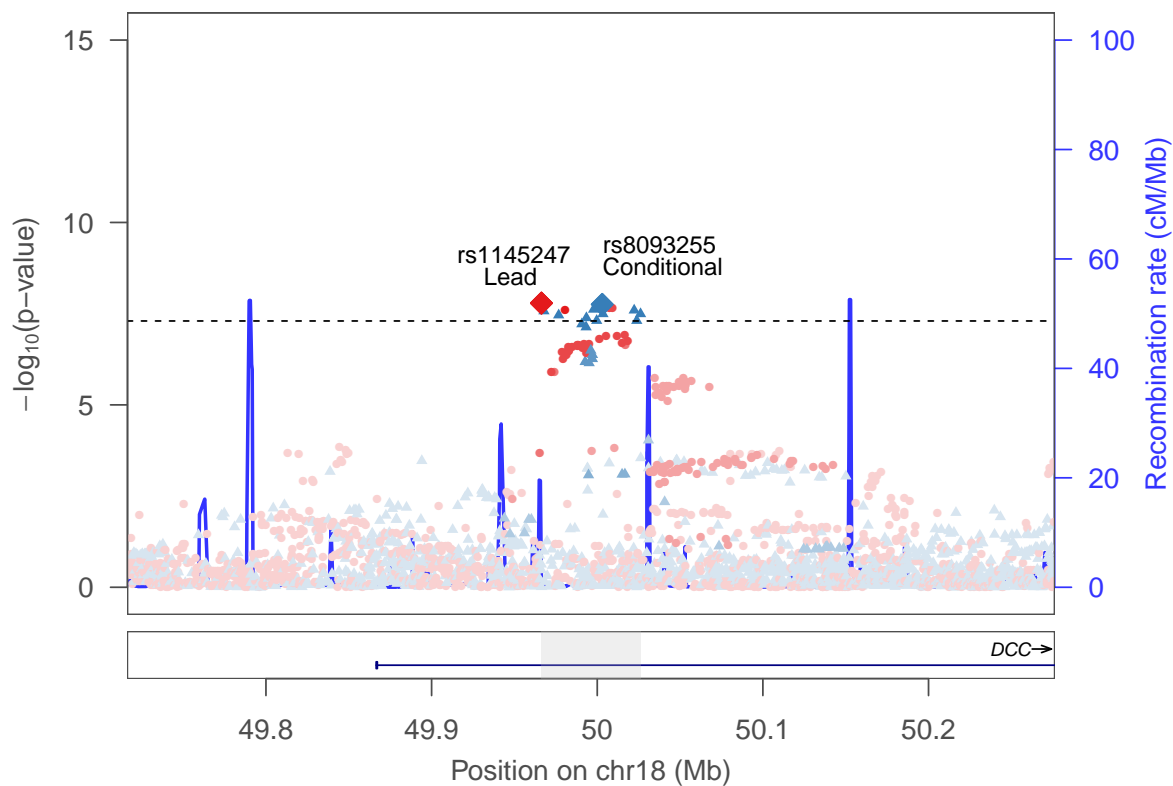

rs8093255 ▲  
rs1145247 ●

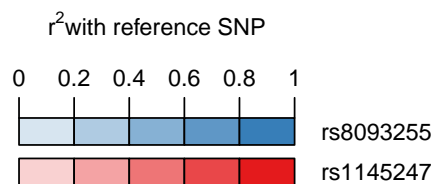

# Number of sexual partners: Locus 94 [chr 18: 52.965–53.165Mb]

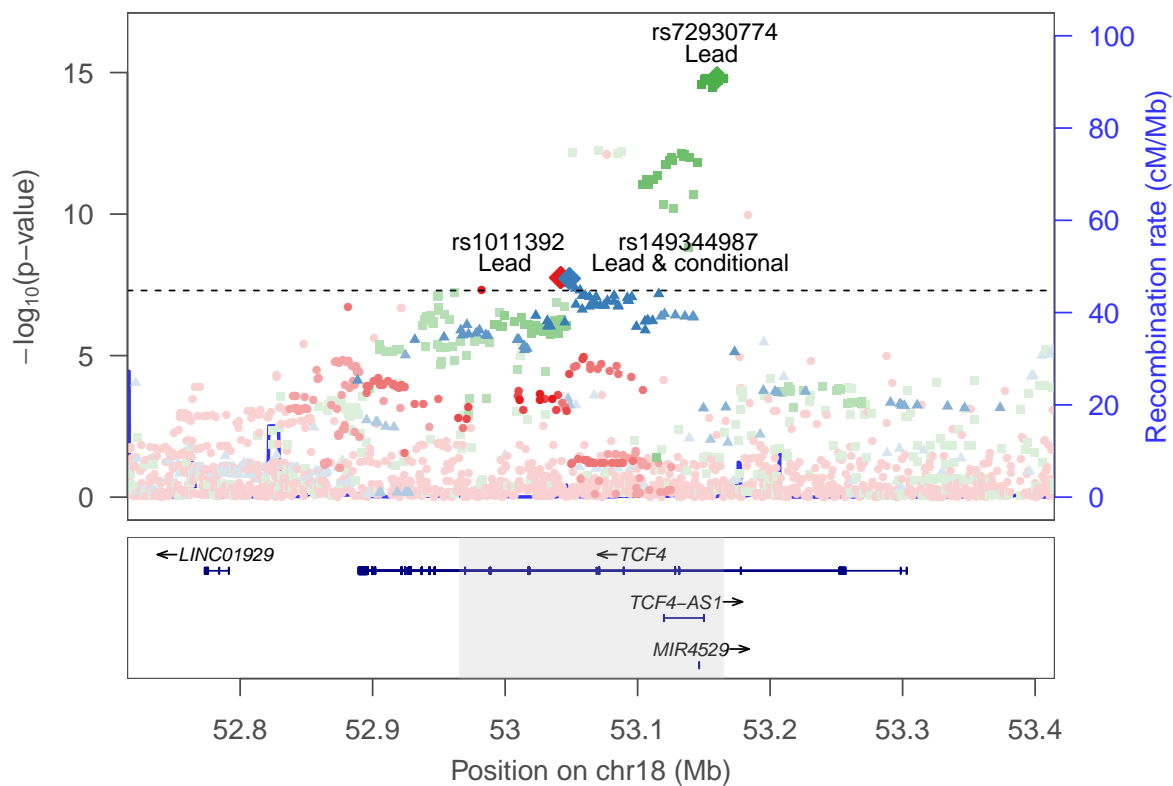

rs72930774    ■  
 rs149344987    ▲  
 rs1011392    ●

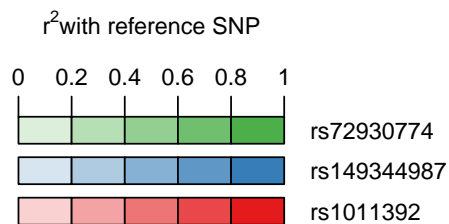

# Number of sexual partners: Locus 95 [chr 18: 53.432–53.744Mb]

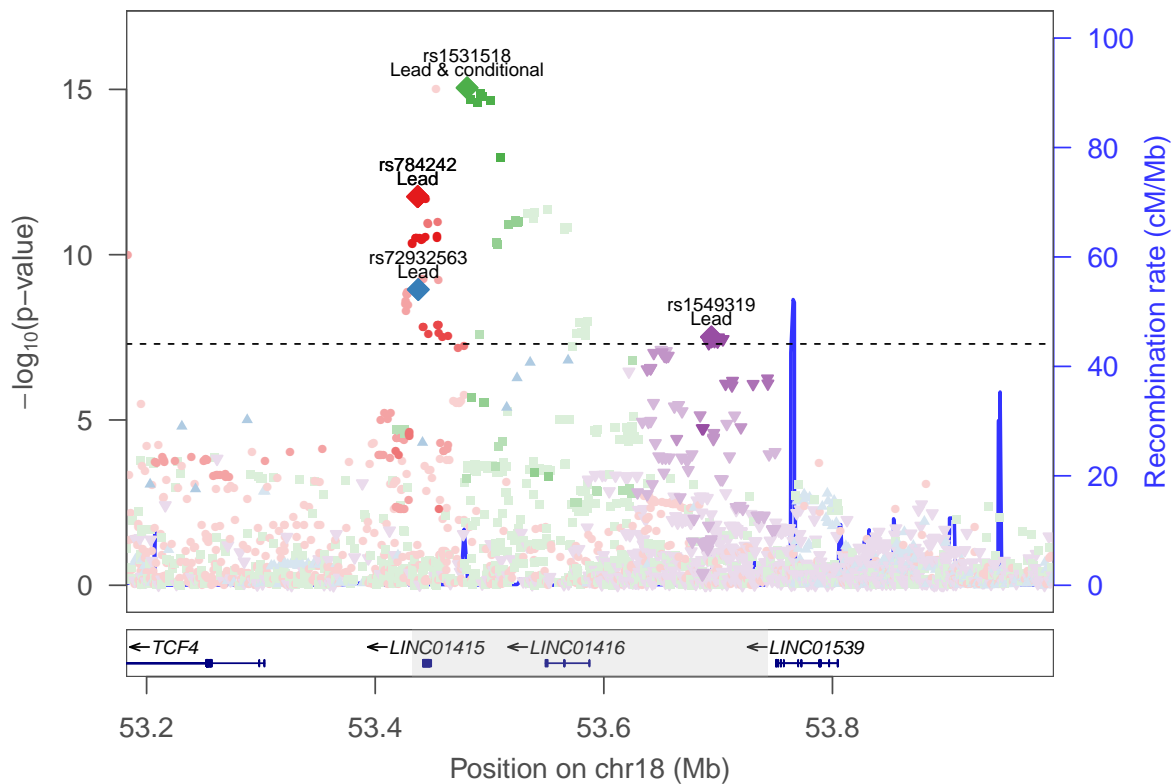

rs1549319    ▾  
 rs1531518    ■  
 rs72932563    ▲  
 rs784242    ●

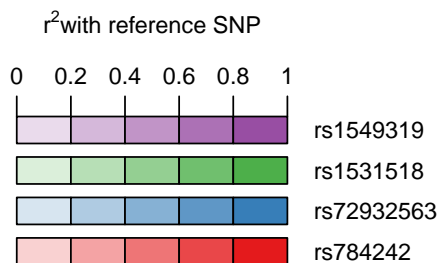

# Number of sexual partners: locus 96 [chr 18:77.552–77.581Mb]

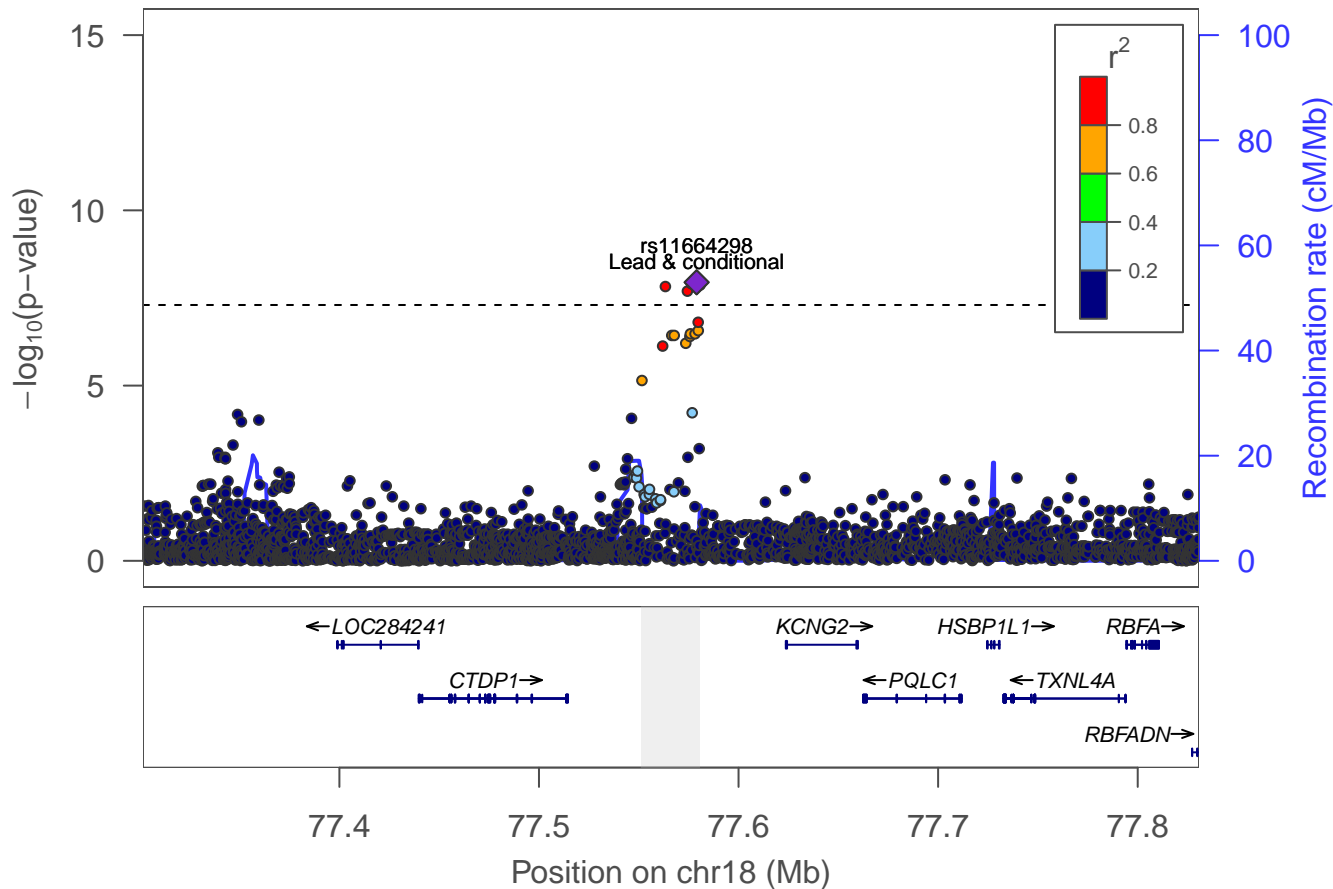

# Number of sexual partners: locus 97 [chr 19:18.207–18.280Mb]

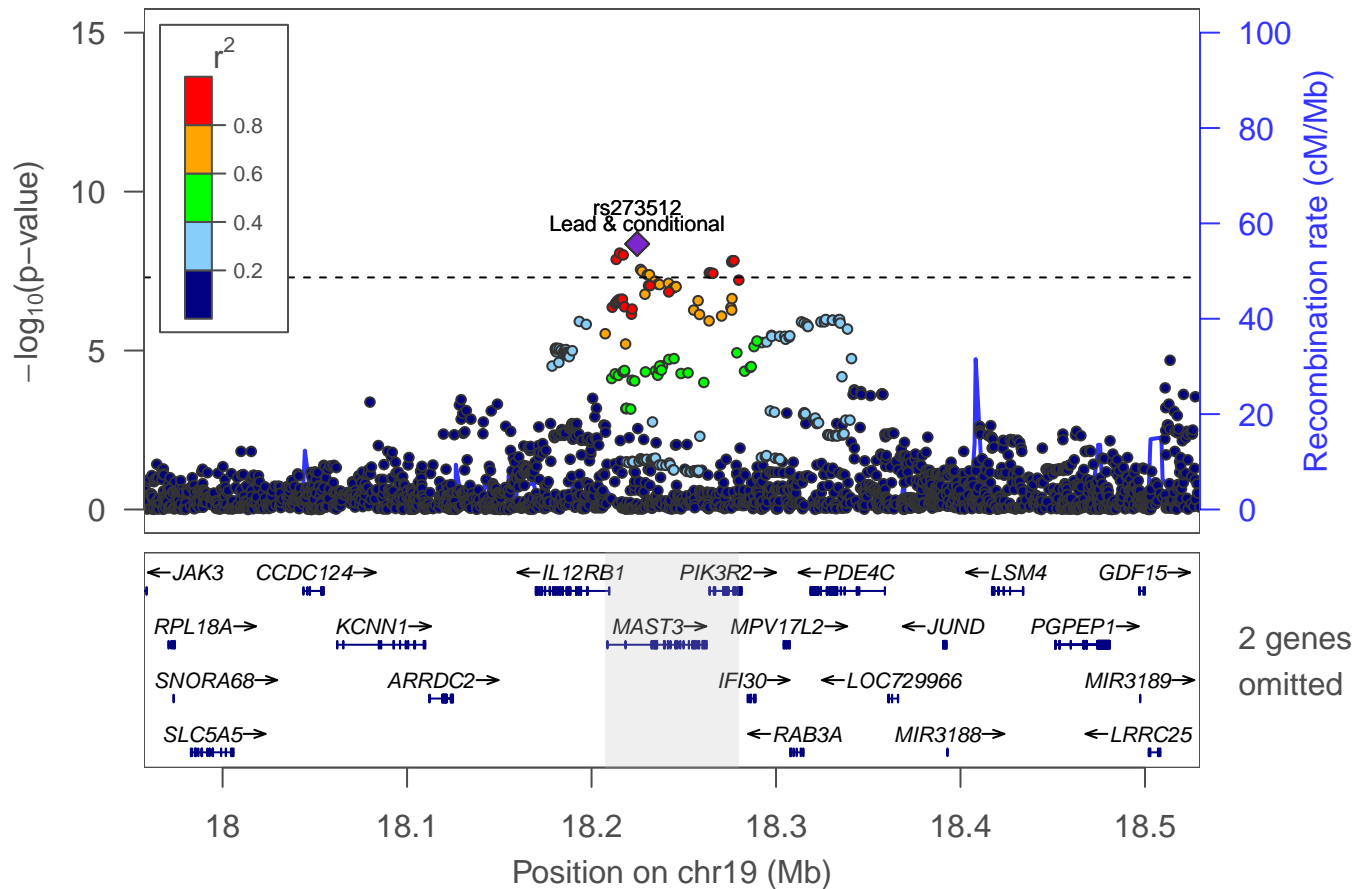

# Number of sexual partners: locus 98 [chr 21:31.316–31.352Mb]

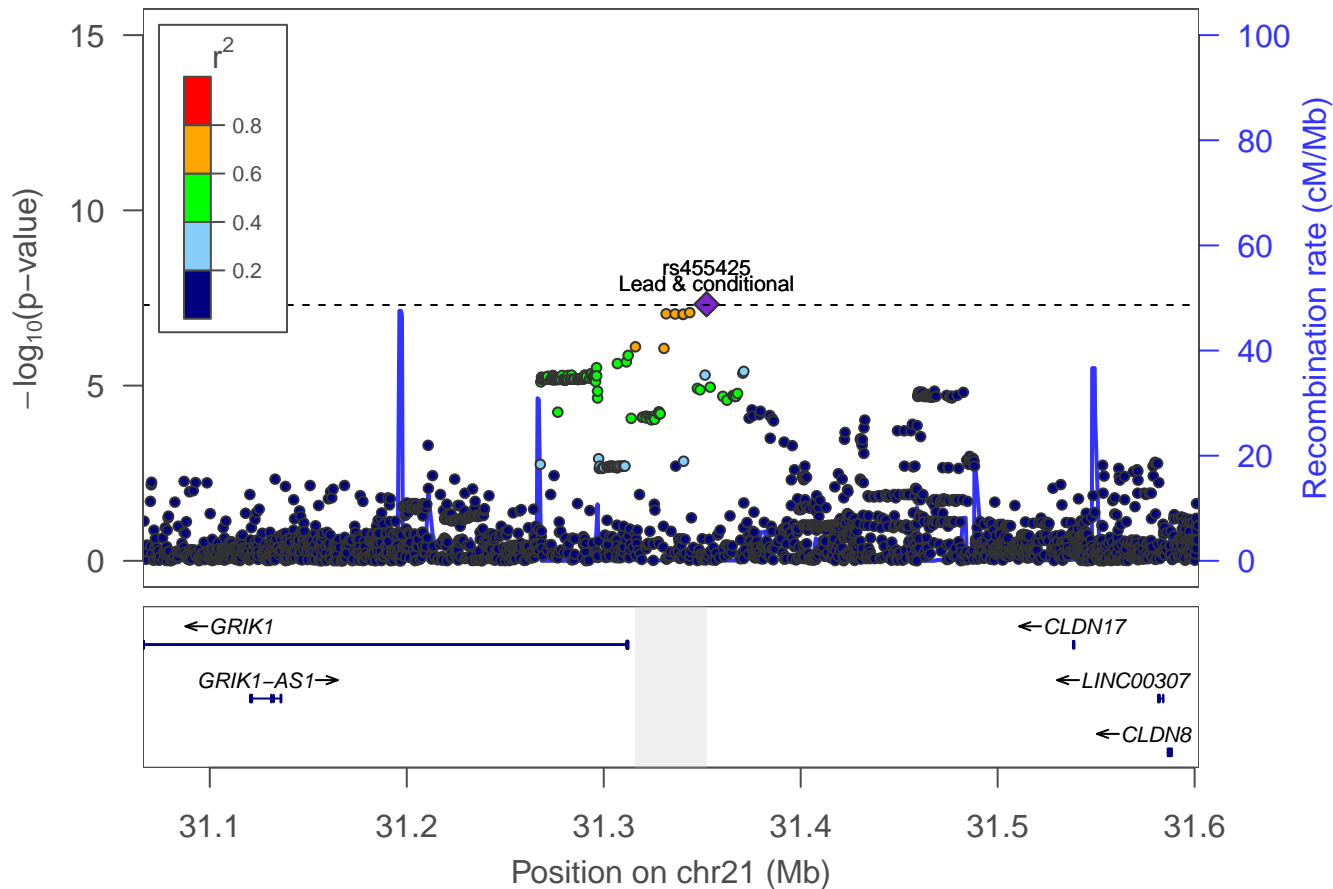

LocusZoom plots for the 89 loci identified  
in the GWAS of the first PC of the risky  
behaviors

---



# First PC risky behaviors: locus 1 [chr 1:33.776–33.916Mb]

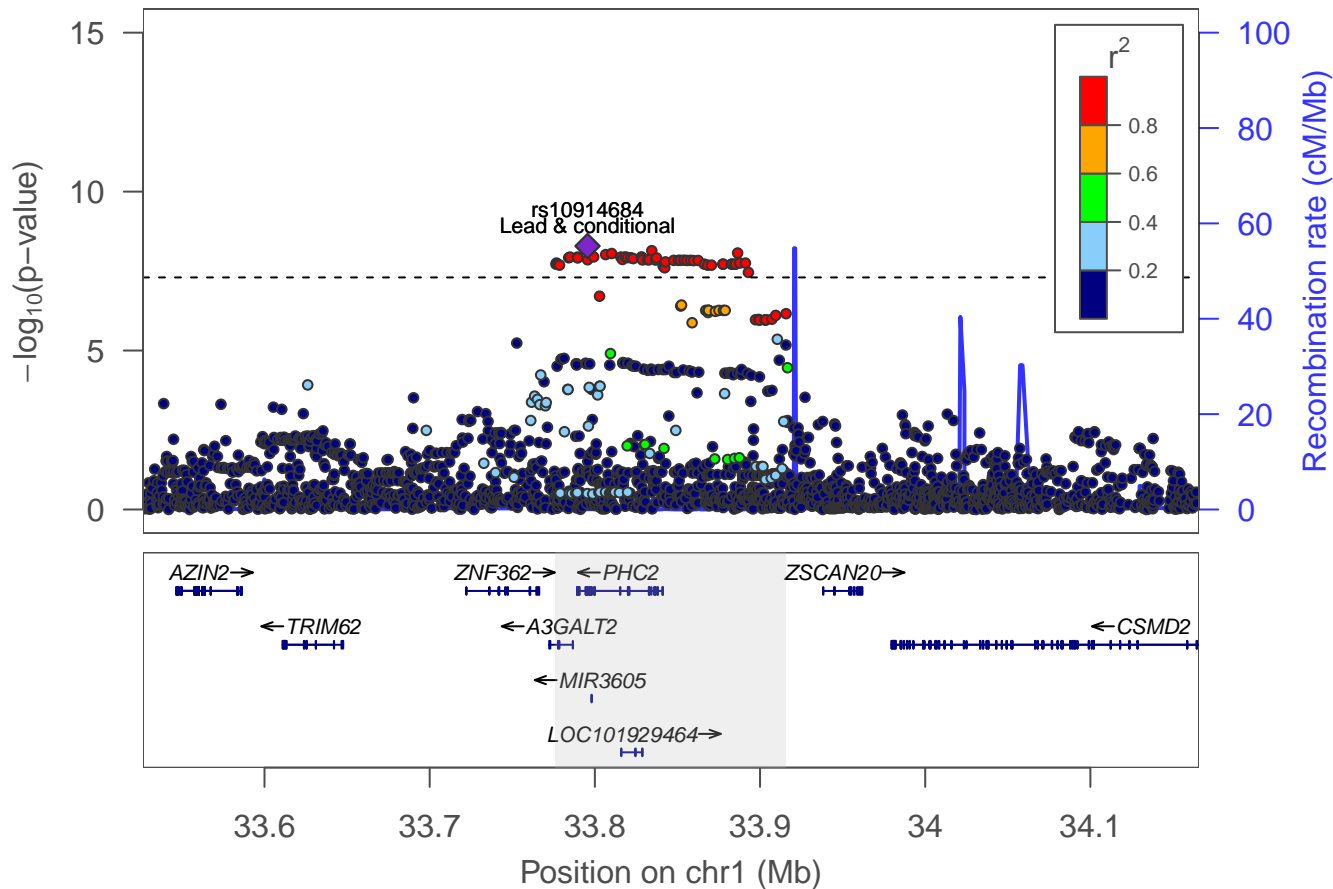

# First PC risky behaviors: locus 2 [chr 1:57.863–57.881Mb]

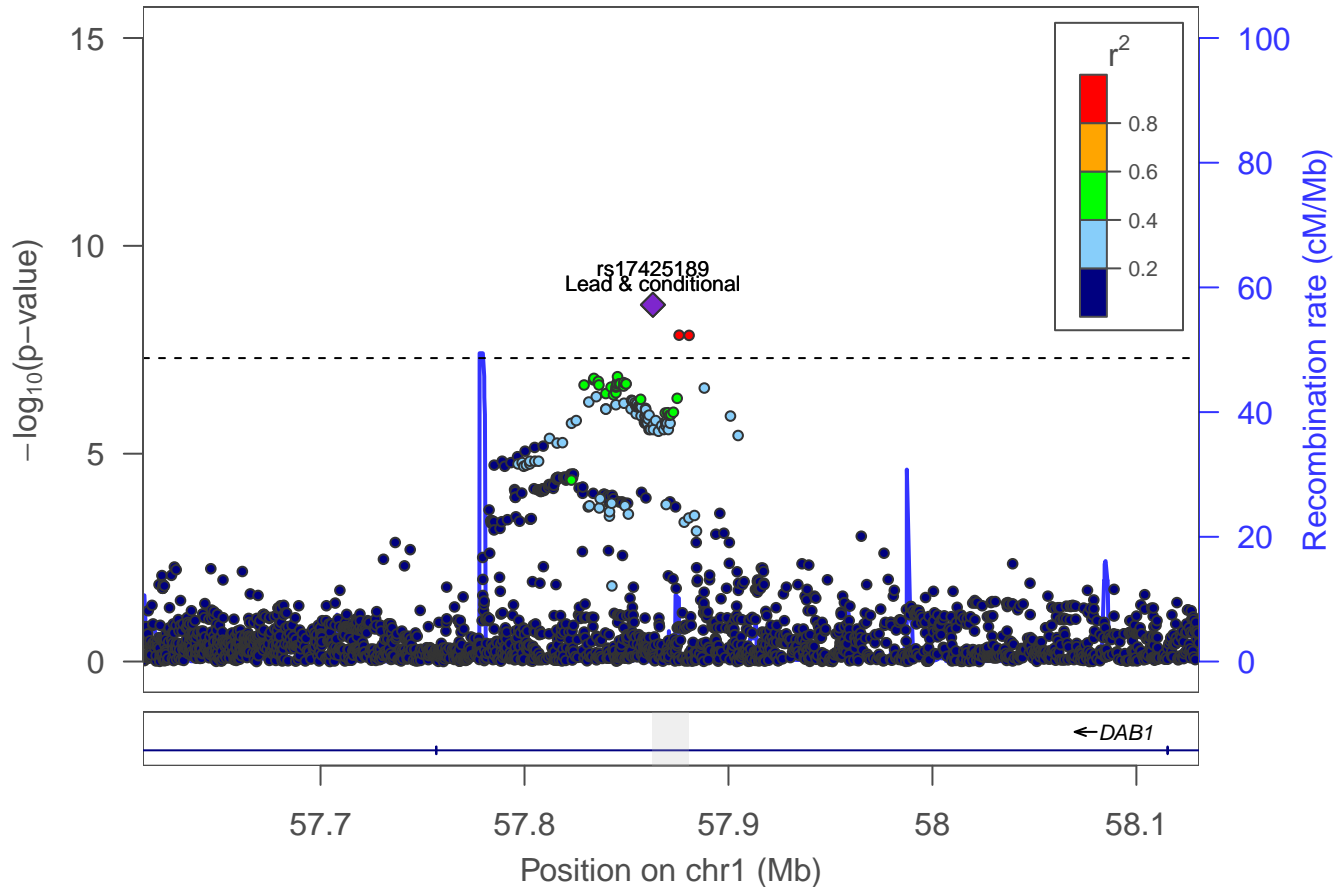

# First PC risky behaviors: locus 3 [chr 1:61.672–61.743Mb]

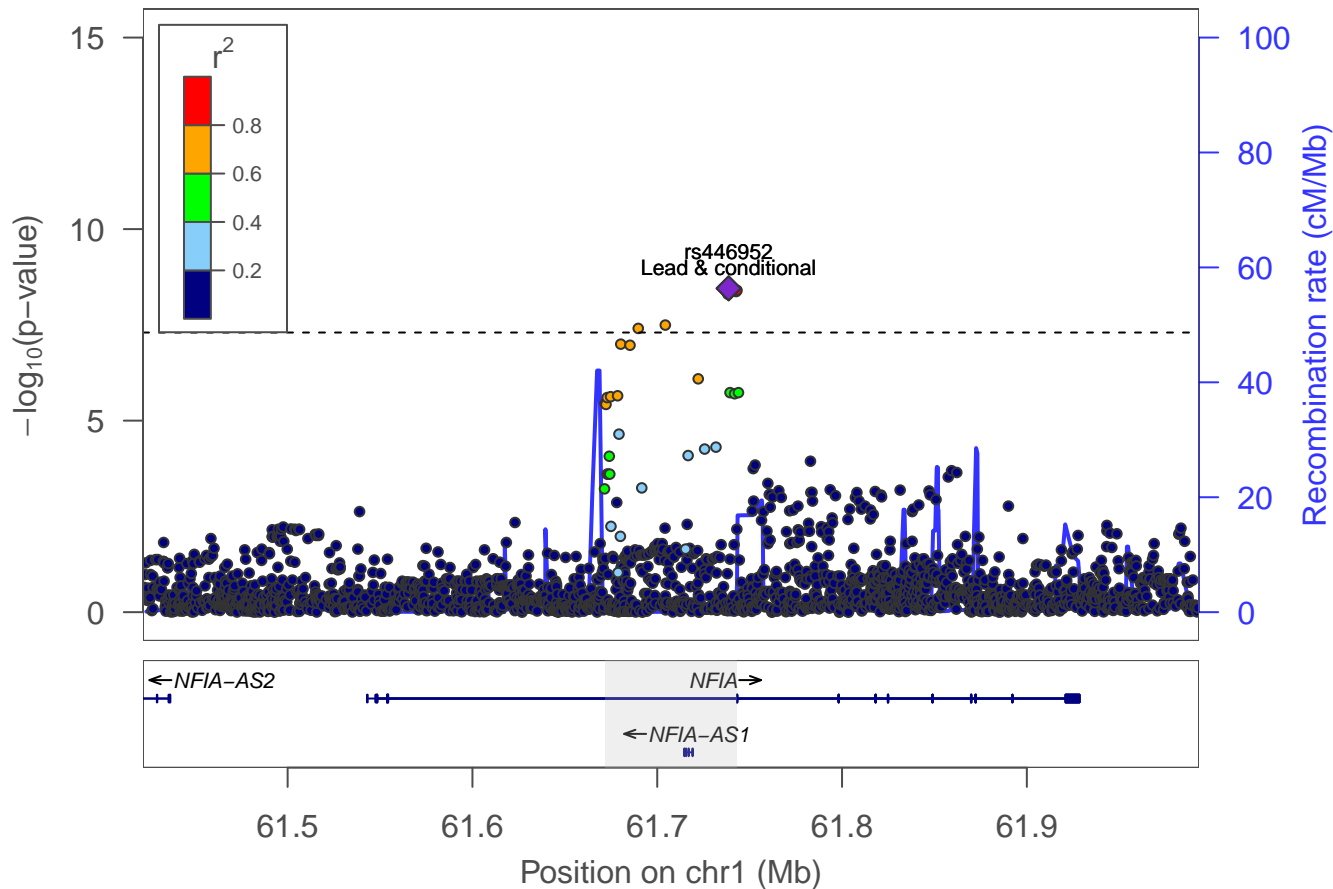

# First PC risky behaviors: locus 4 [chr 1:66.370–66.485Mb]

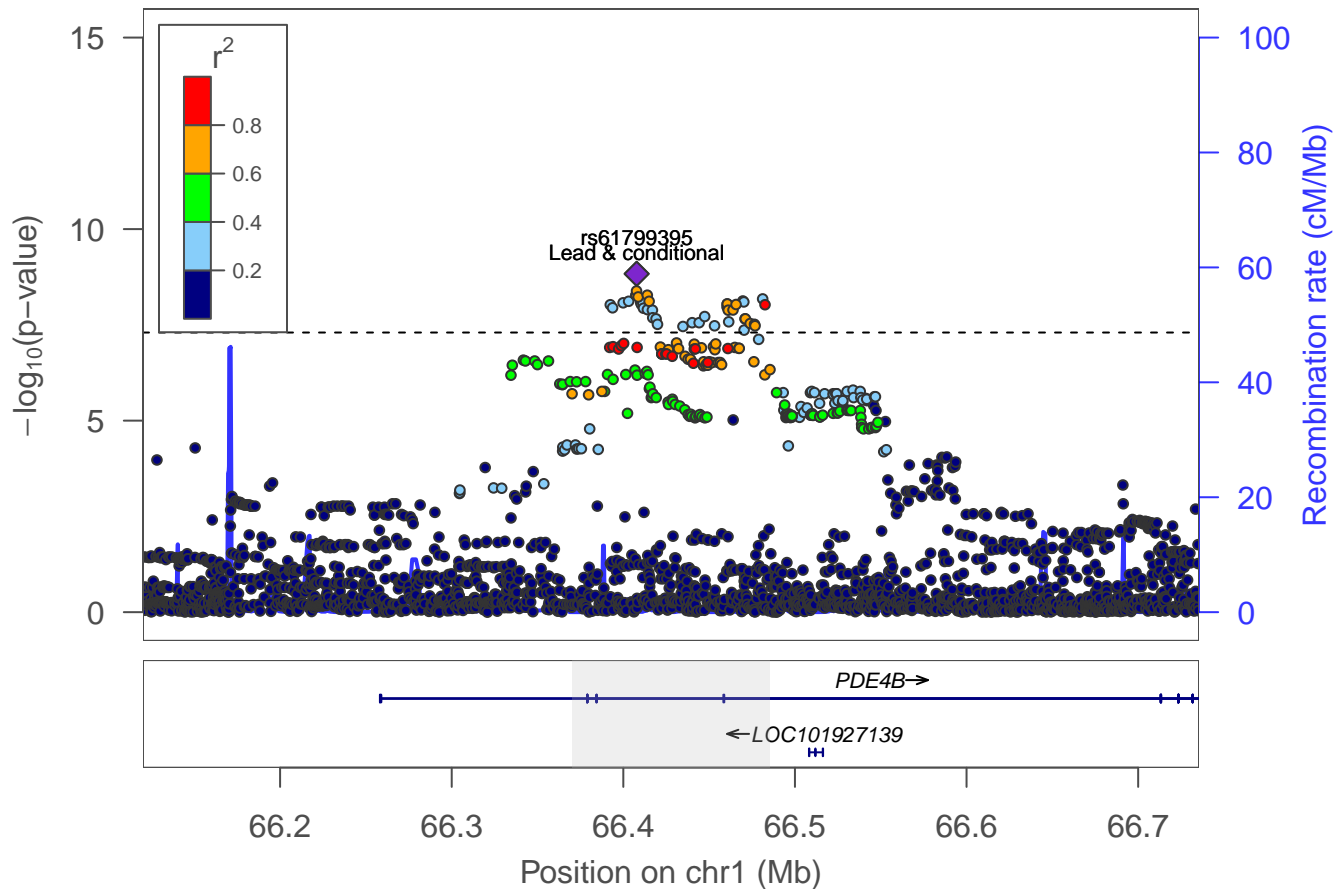

# First PC risky behaviors: Locus 5 [chr 1: 91.190–91.215Mb]

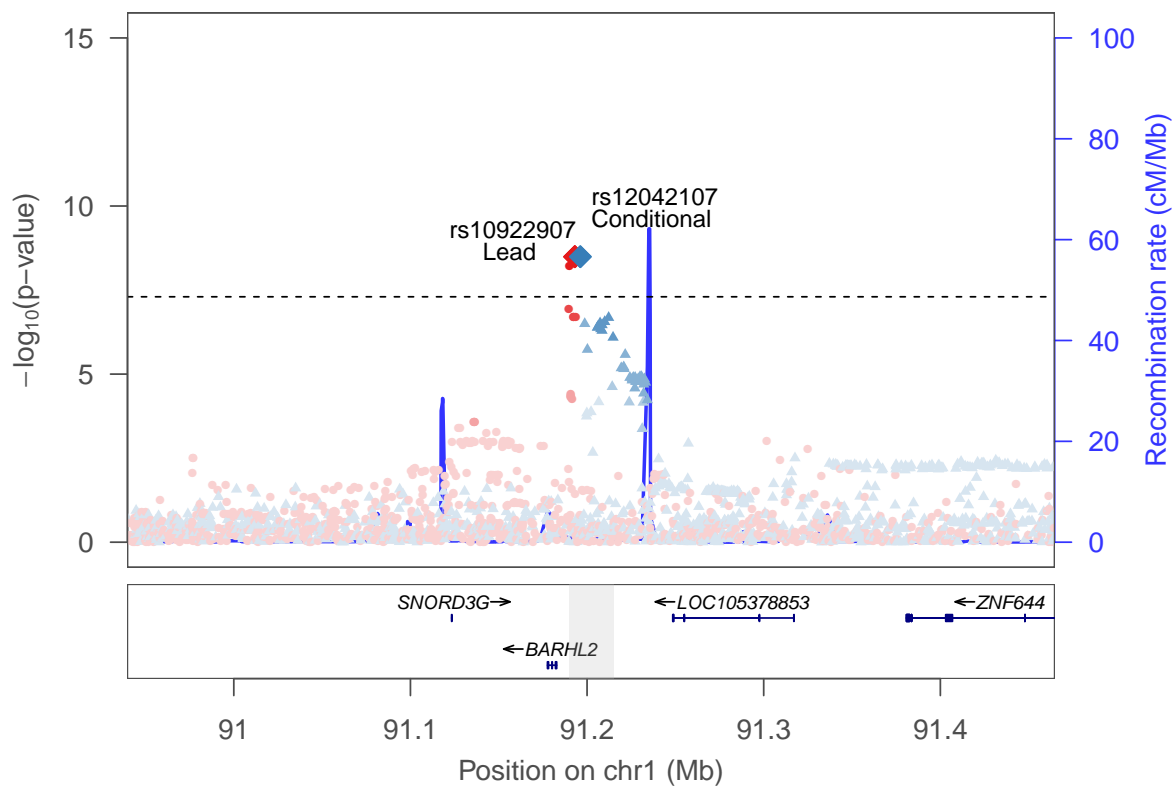

rs12042107 ▲  
rs10922907 ●

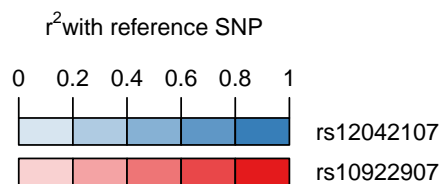

# First PC risky behaviors: locus 6 [chr 1:208.709–208.730Mb]

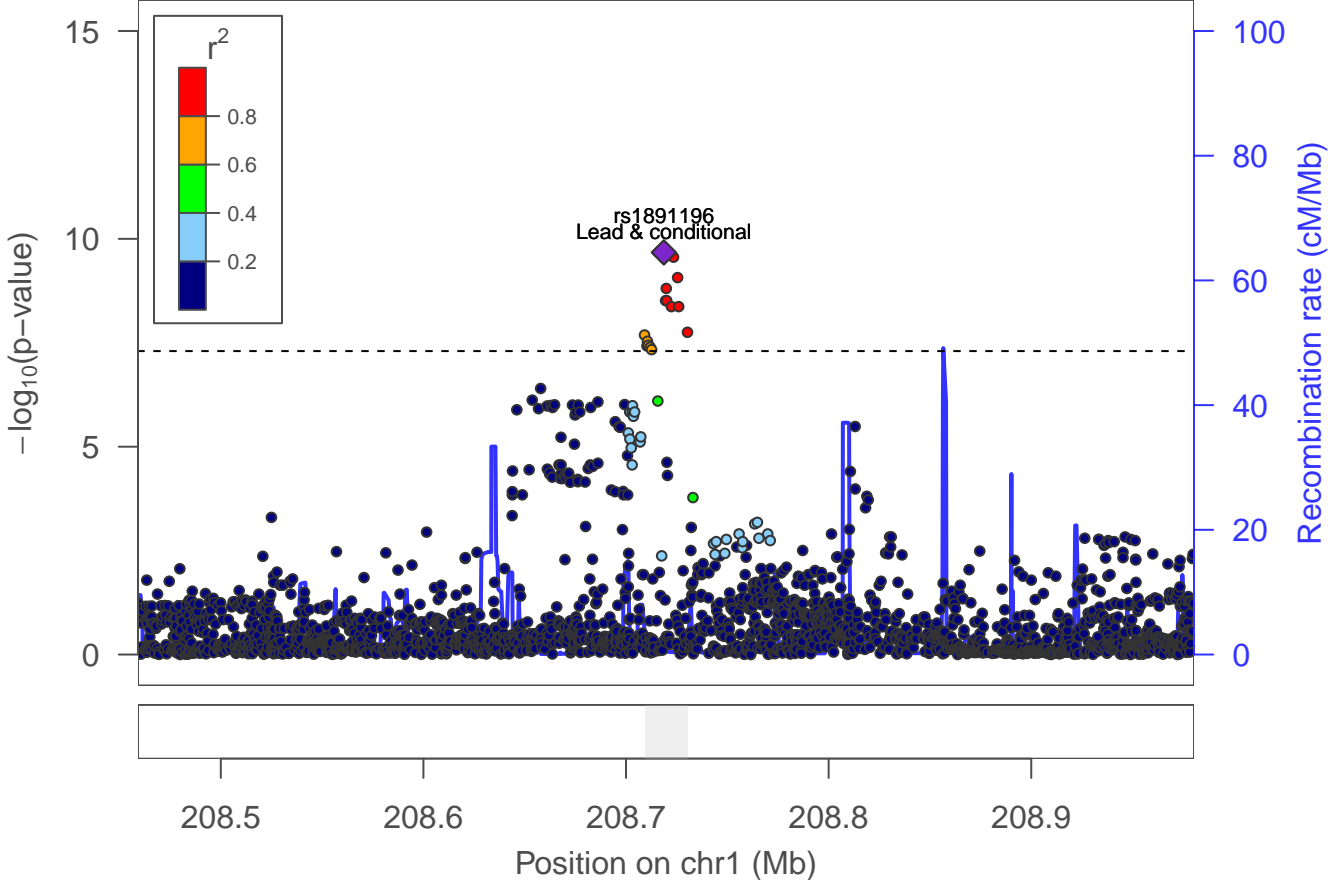

# First PC risky behaviors: locus 7 [chr 2:32.497–32.860Mb]

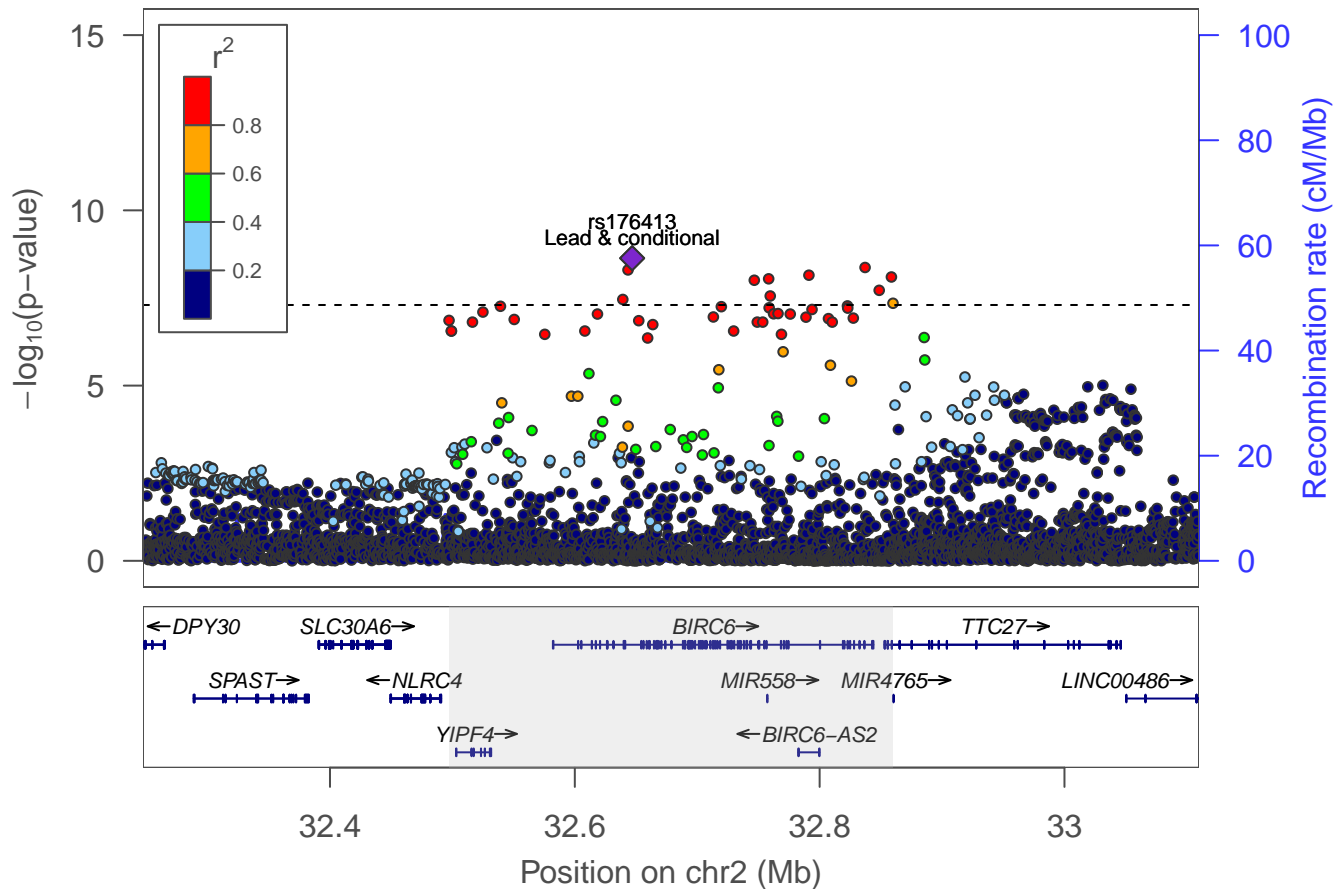

# First PC risky behaviors: locus 8 [chr 2:44.296–44.300Mb]

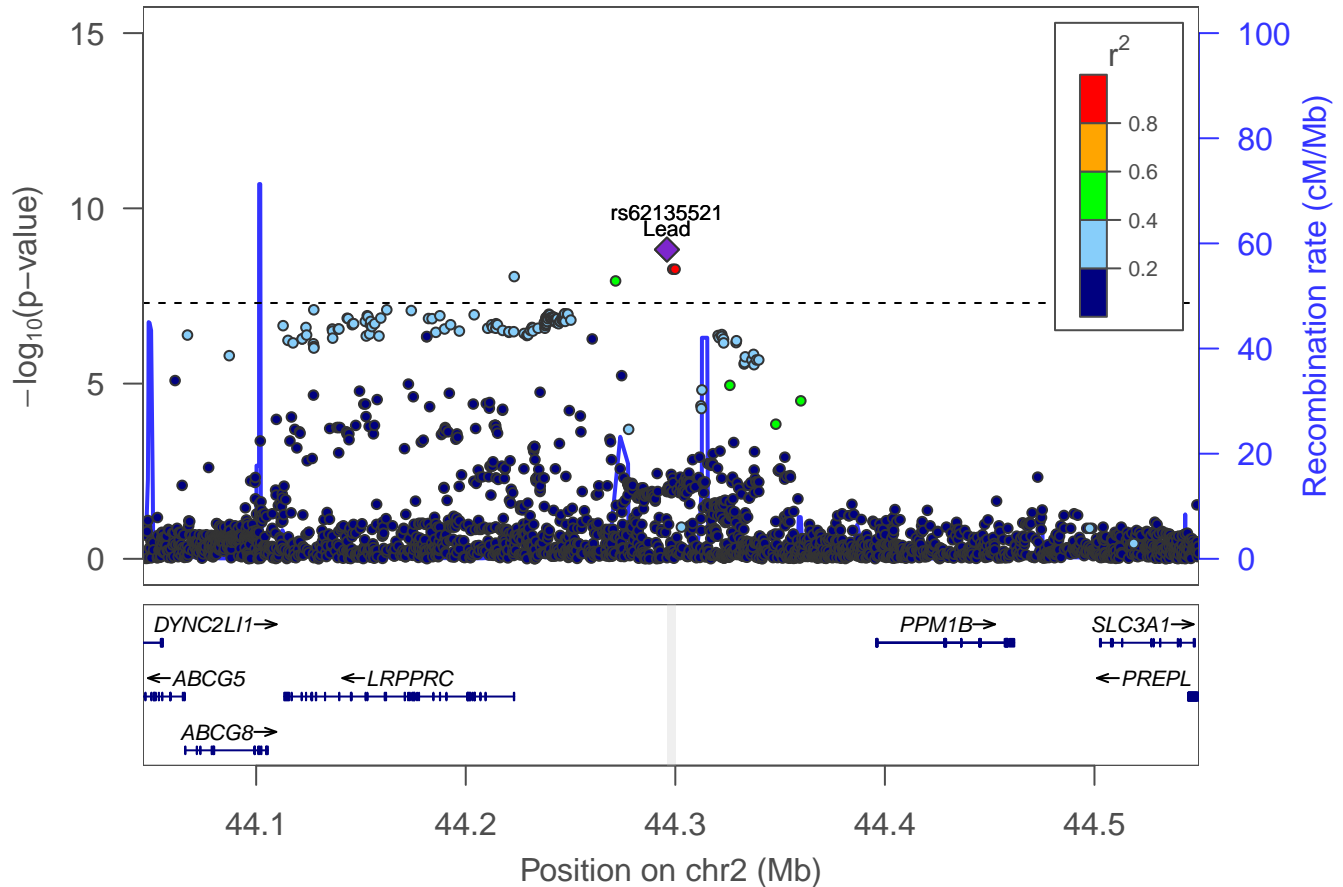



# First PC risky behaviors: locus 9 [chr 2:45.121–45.176Mb]

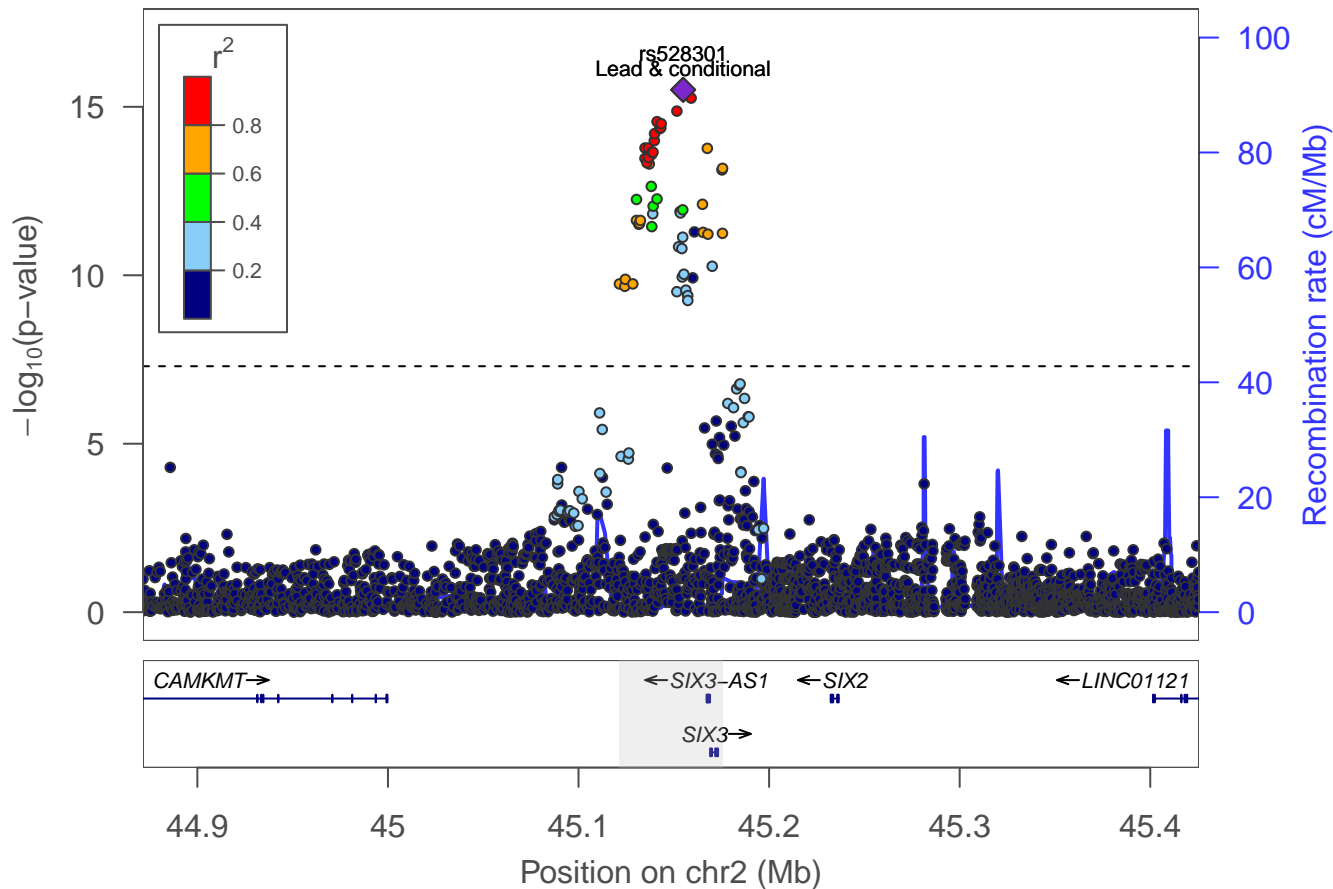

# First PC risky behaviors: locus 10 [chr 2:48.778–48.807Mb]

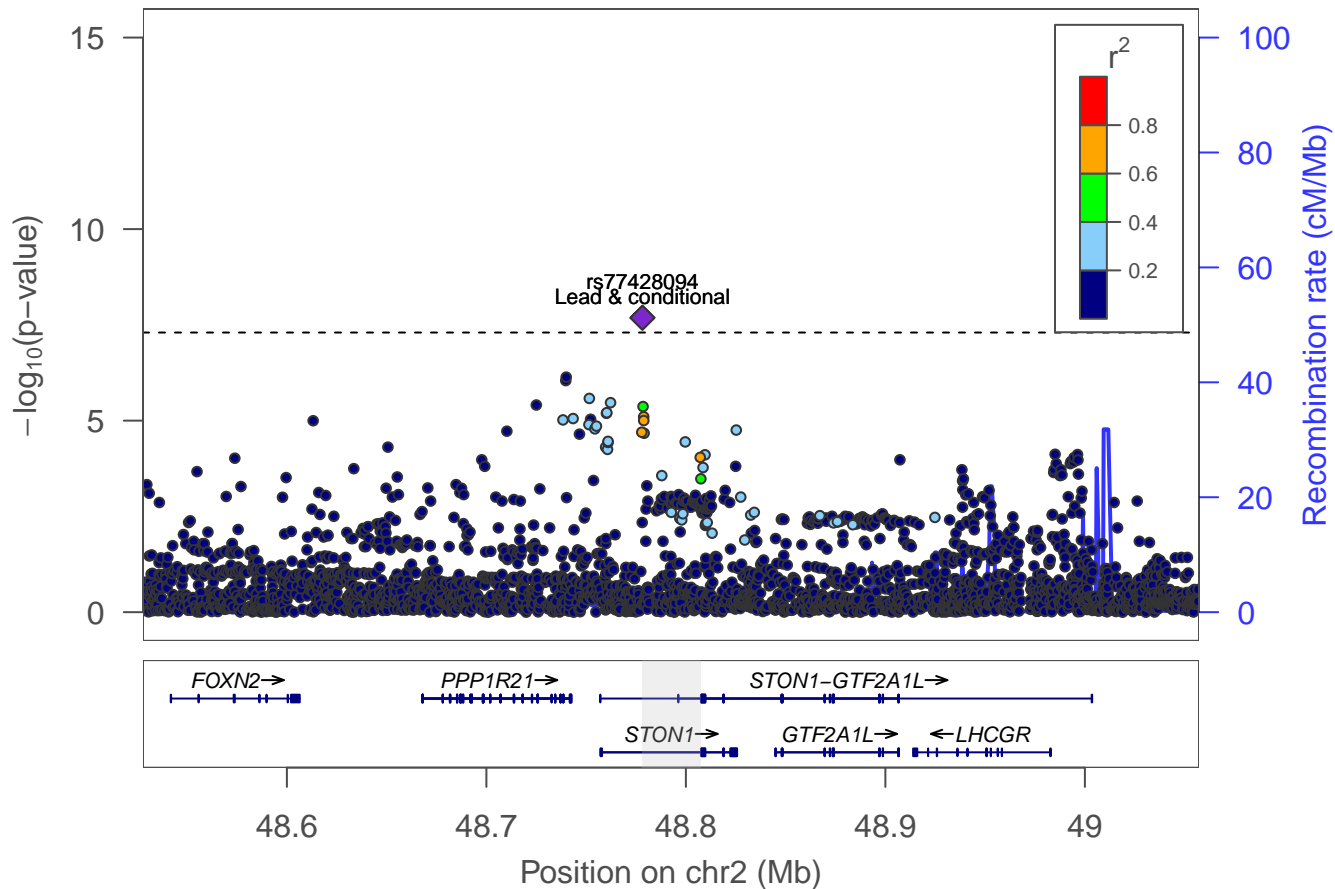

# First PC risky behaviors: Locus 11 [chr 2: 60.000–60.528Mb]

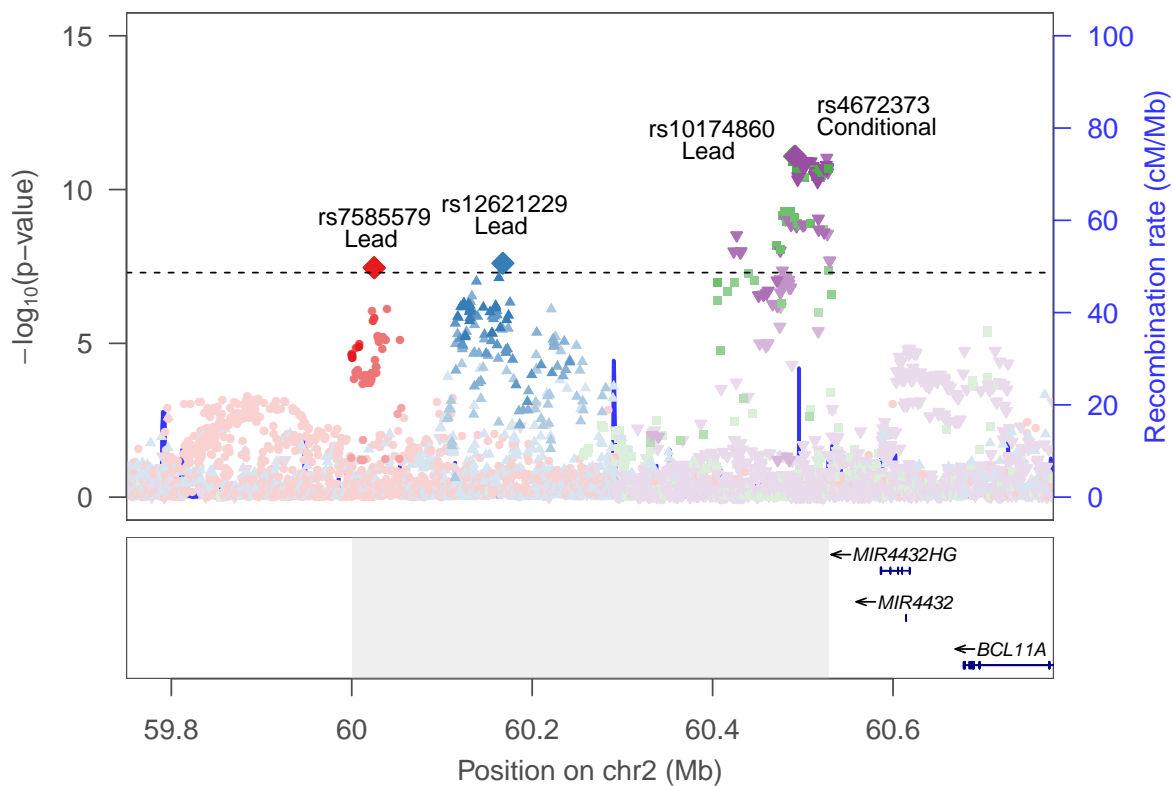

rs4672373    ▾  
 rs10174860    ■  
 rs12621229    ▲  
 rs7585579    ●

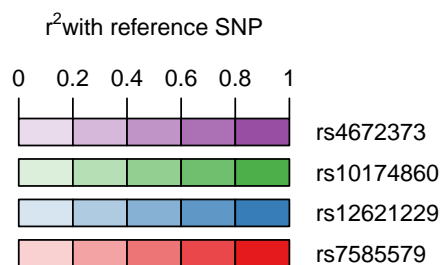

# First PC risky behaviors: locus 12 [chr 2:62.917–63.448Mb]

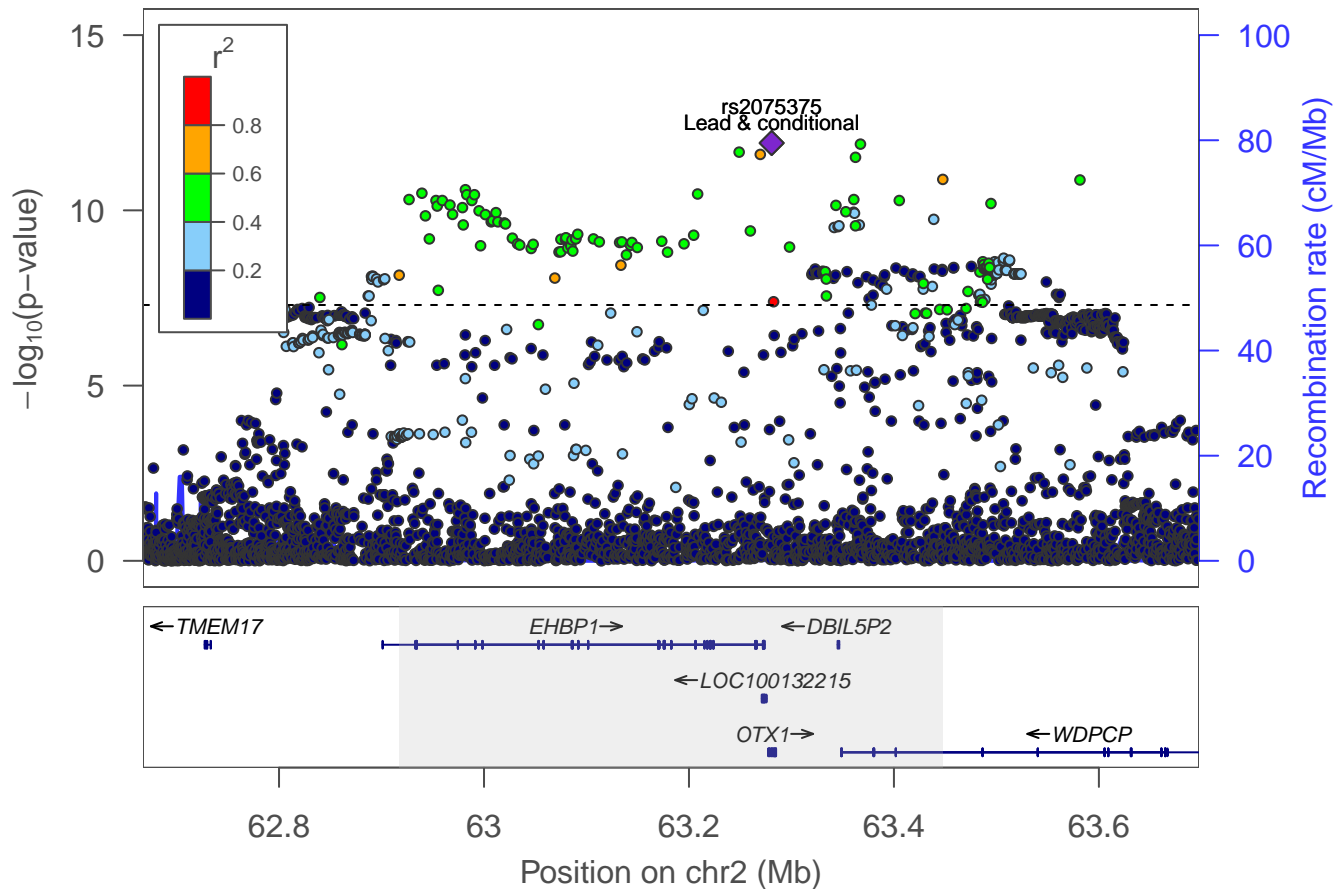

# First PC risky behaviors: locus 13 [chr 2:74.334–74.334Mb]

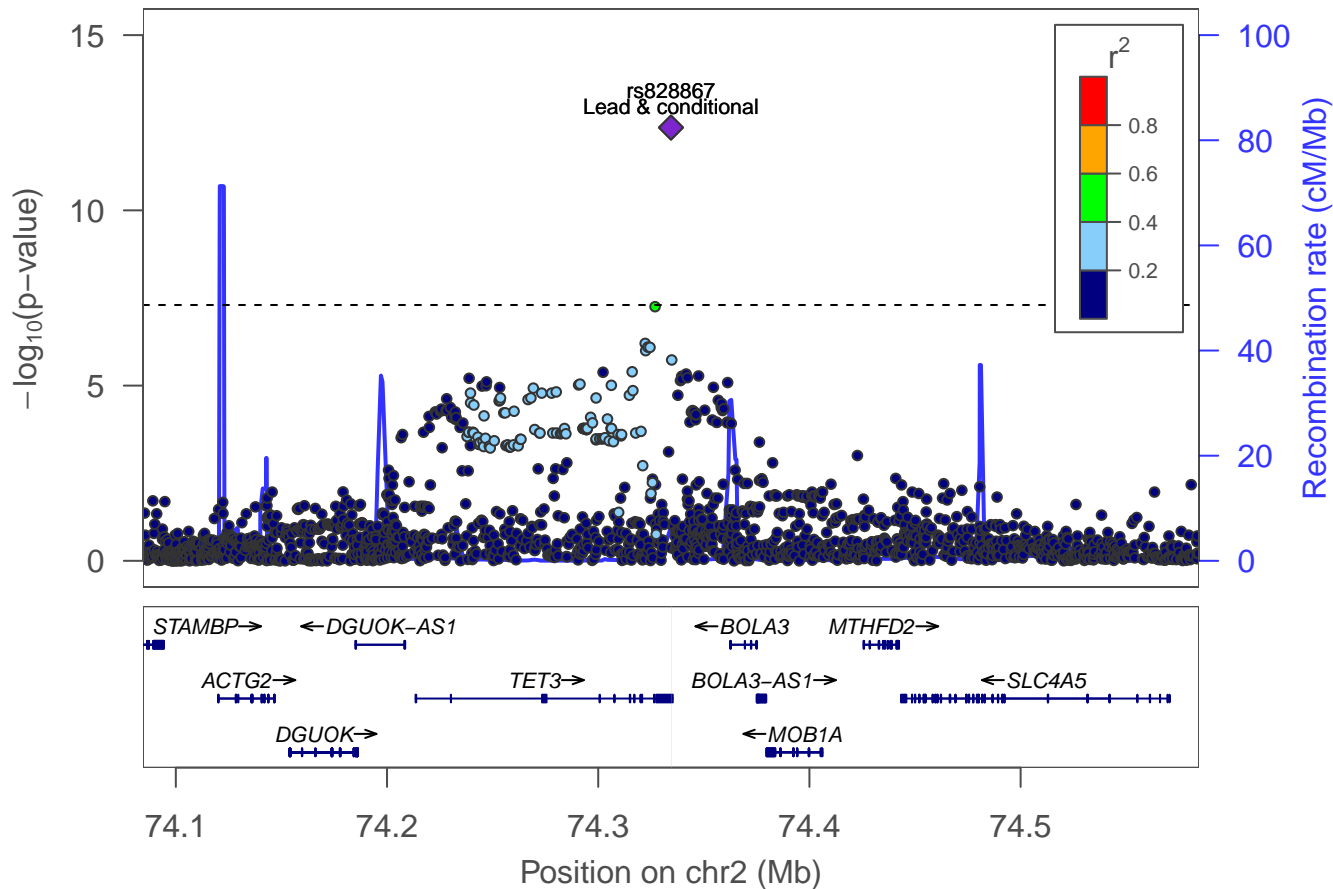

# First PC risky behaviors: locus 14 [chr 2:77.038–77.195Mb]

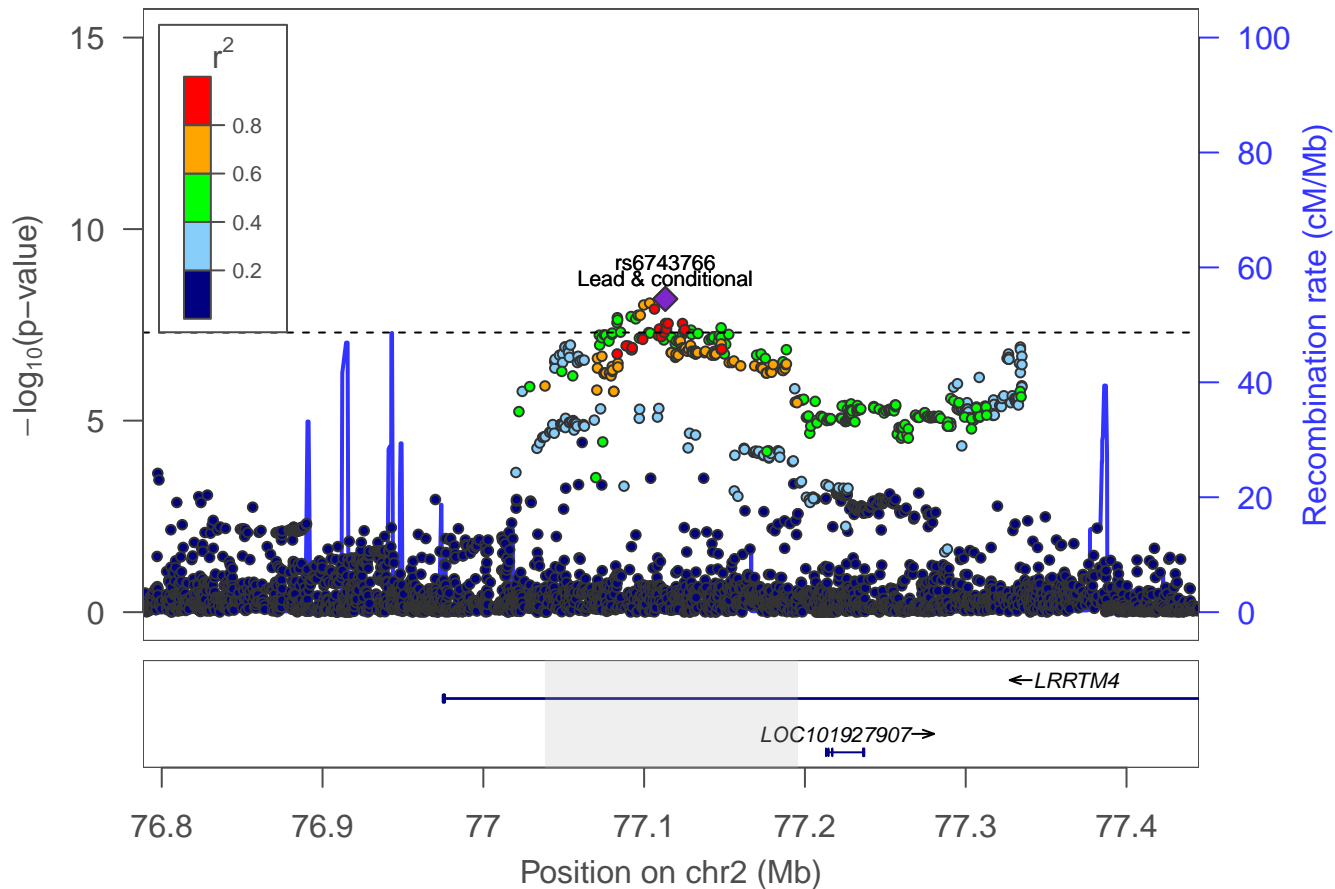

# First PC risky behaviors: locus 15 [chr 2:104.057–104.381Mb]

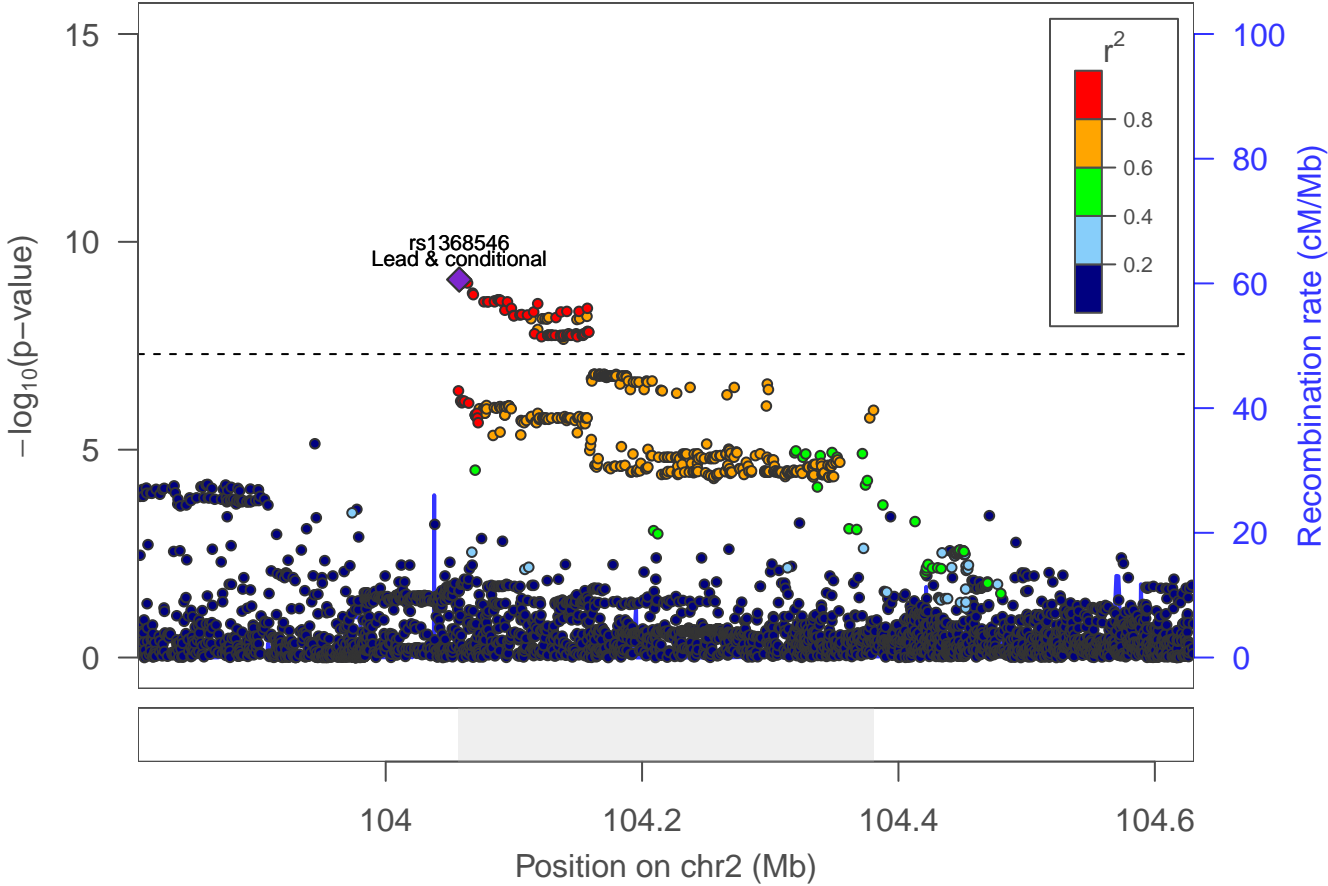

# First PC risky behaviors: locus 16 [chr 2:137.223–137.625Mb]

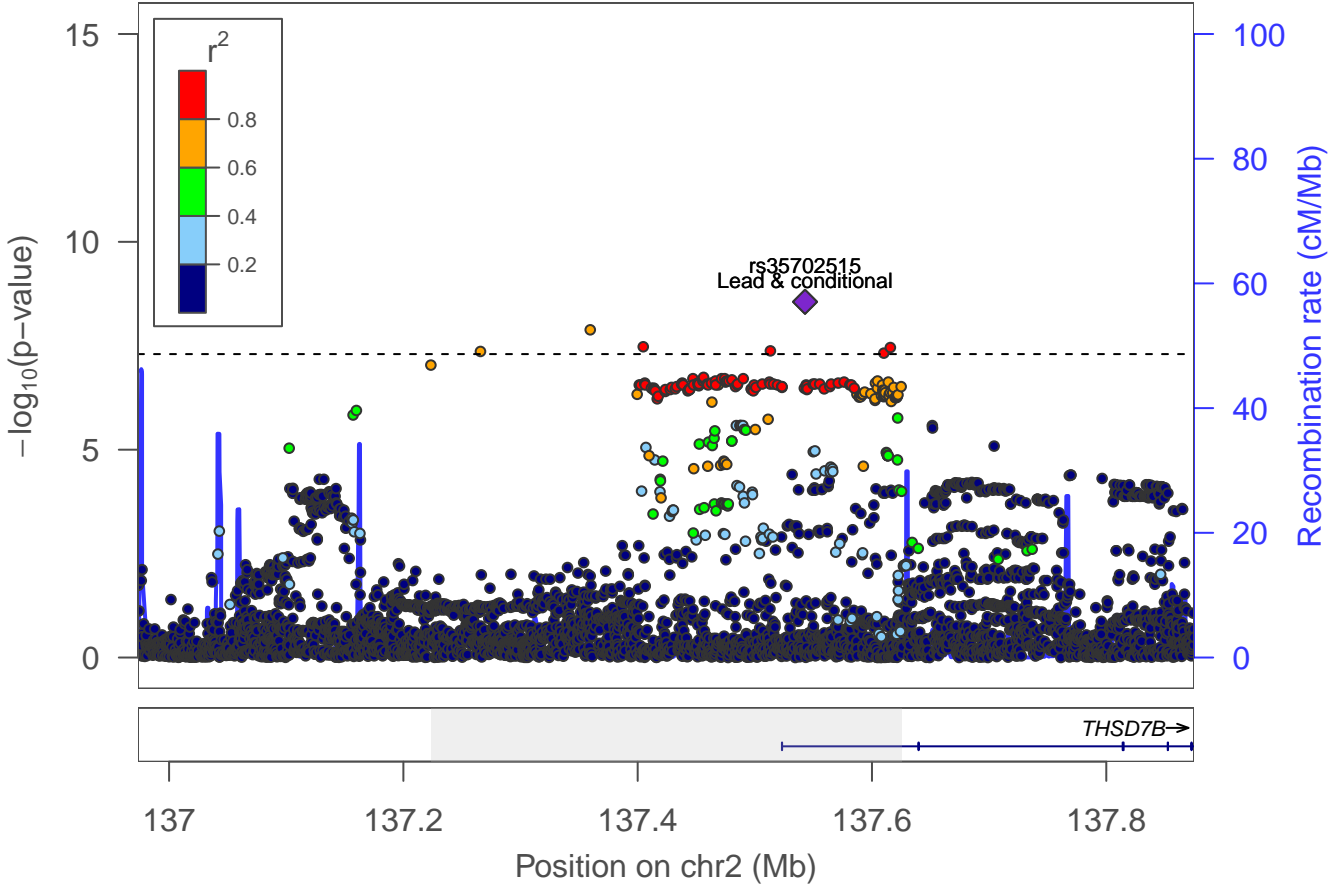



# First PC risky behaviors: locus 17 [chr 2:146.167–146.316Mb]

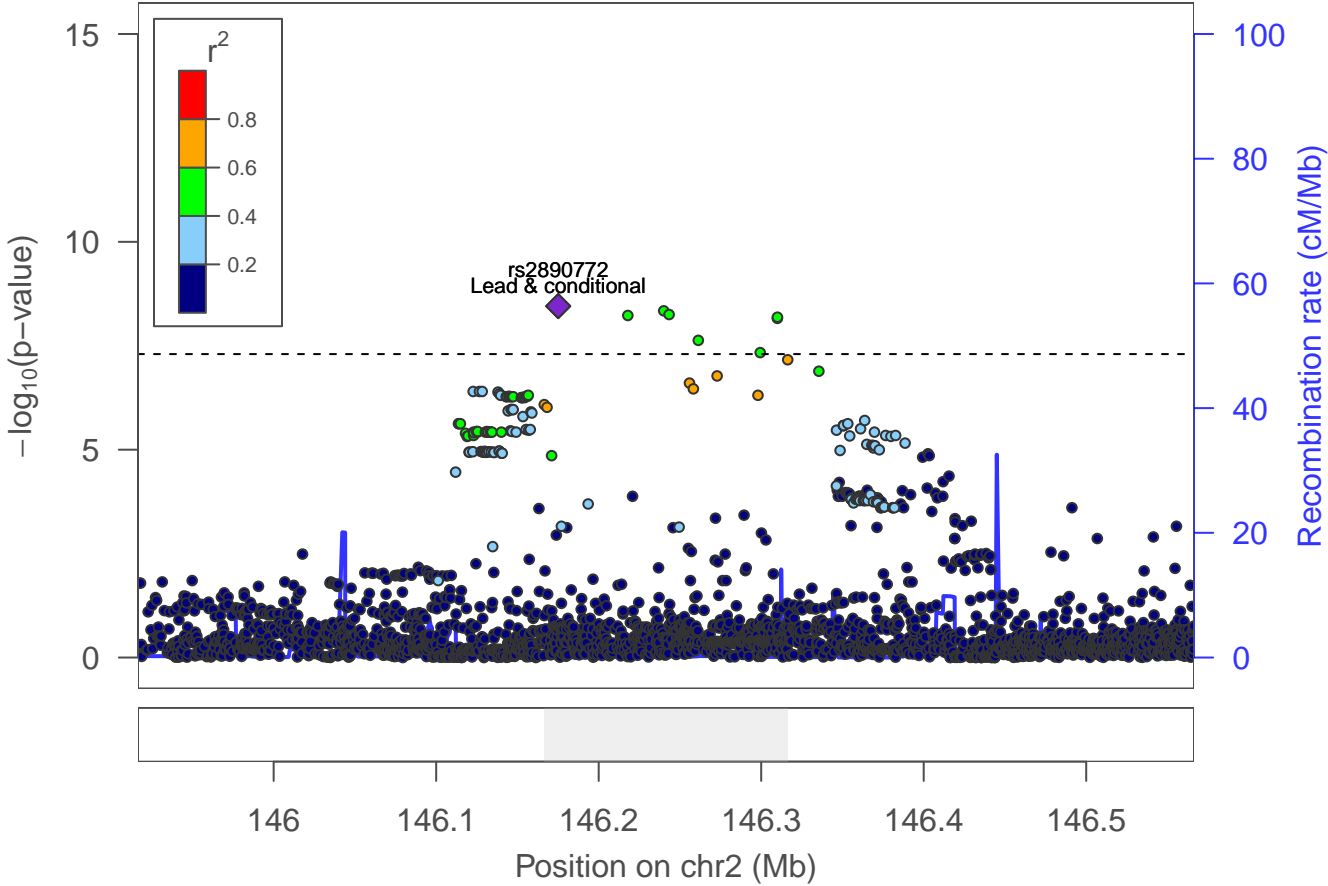

# First PC risky behaviors: locus 18 [chr 2:155.655–156.109Mb]

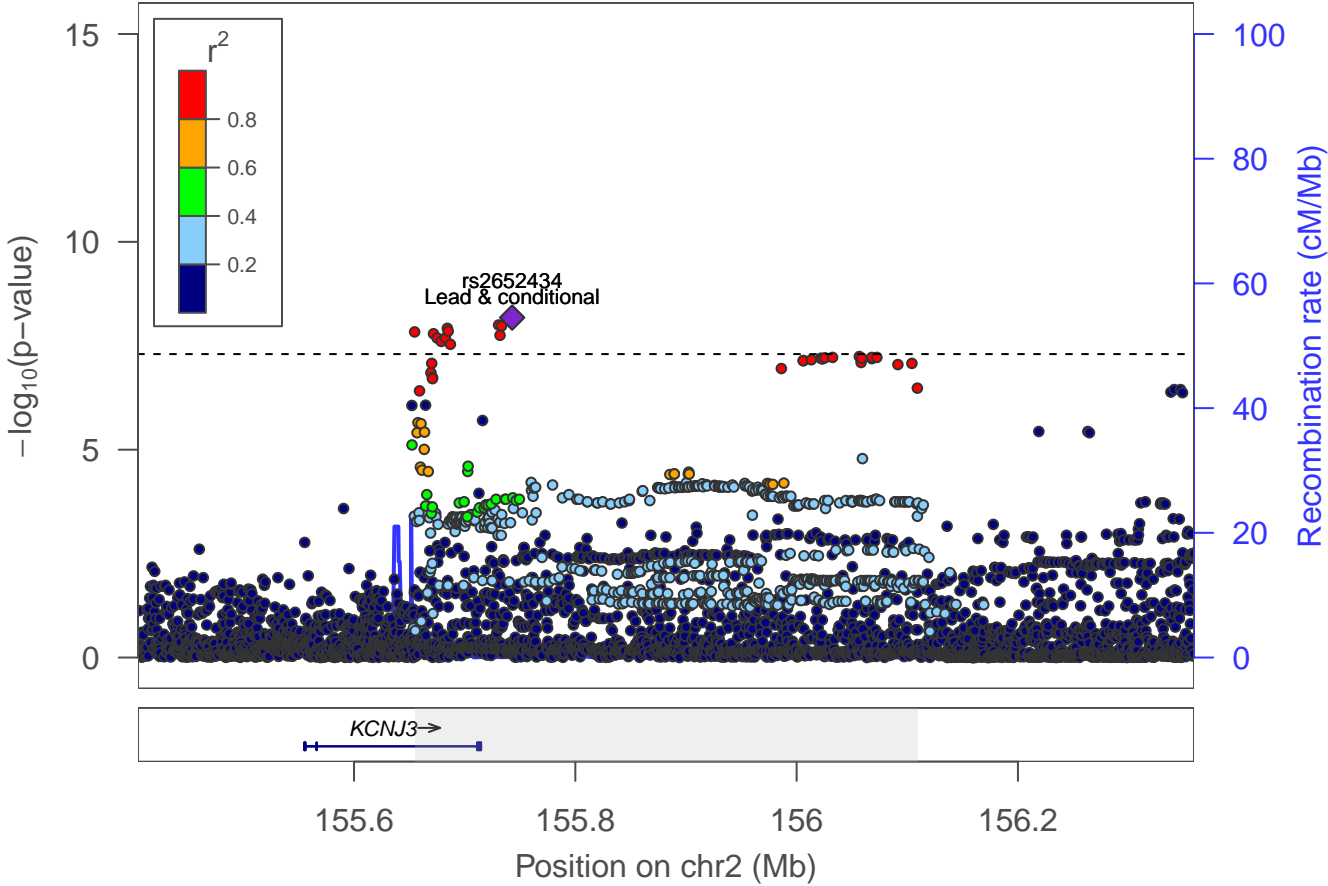

# First PC risky behaviors: locus 19 [chr 2:181.828–182.096Mb]

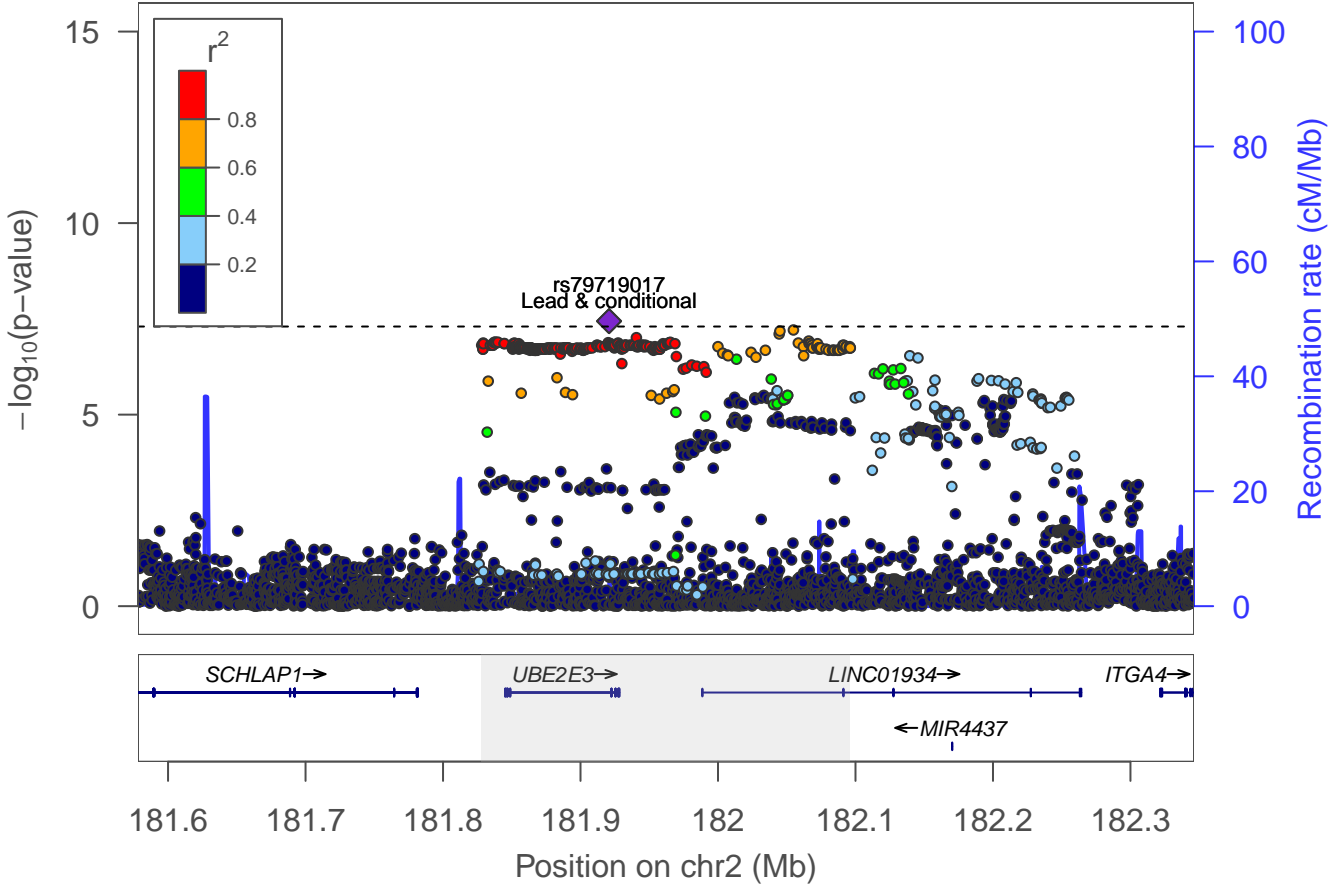

# First PC risky behaviors: locus 20 [chr 2:202.843–202.849Mb]

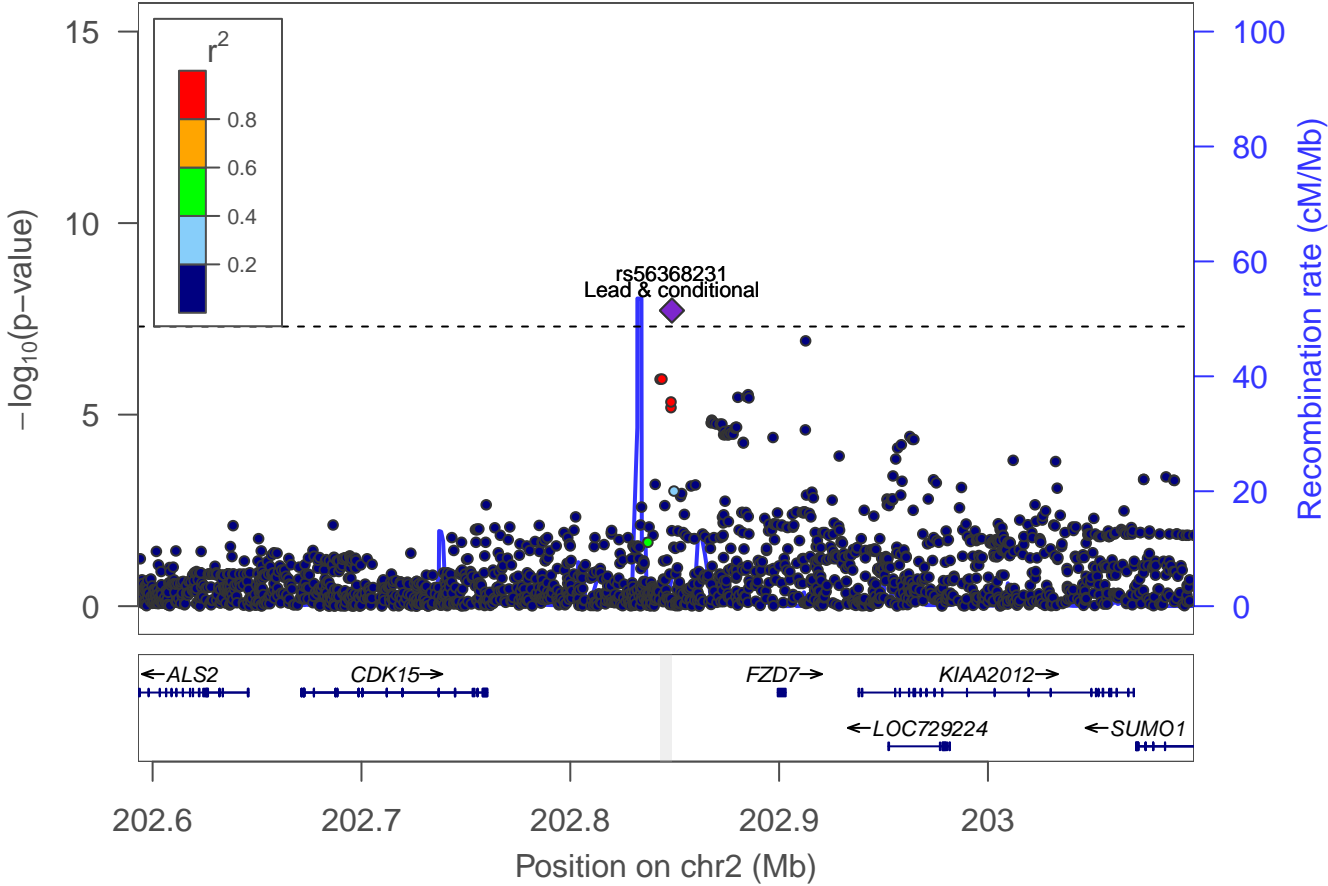

# First PC risky behaviors: locus 21 [chr 3:52.537–52.848Mb]

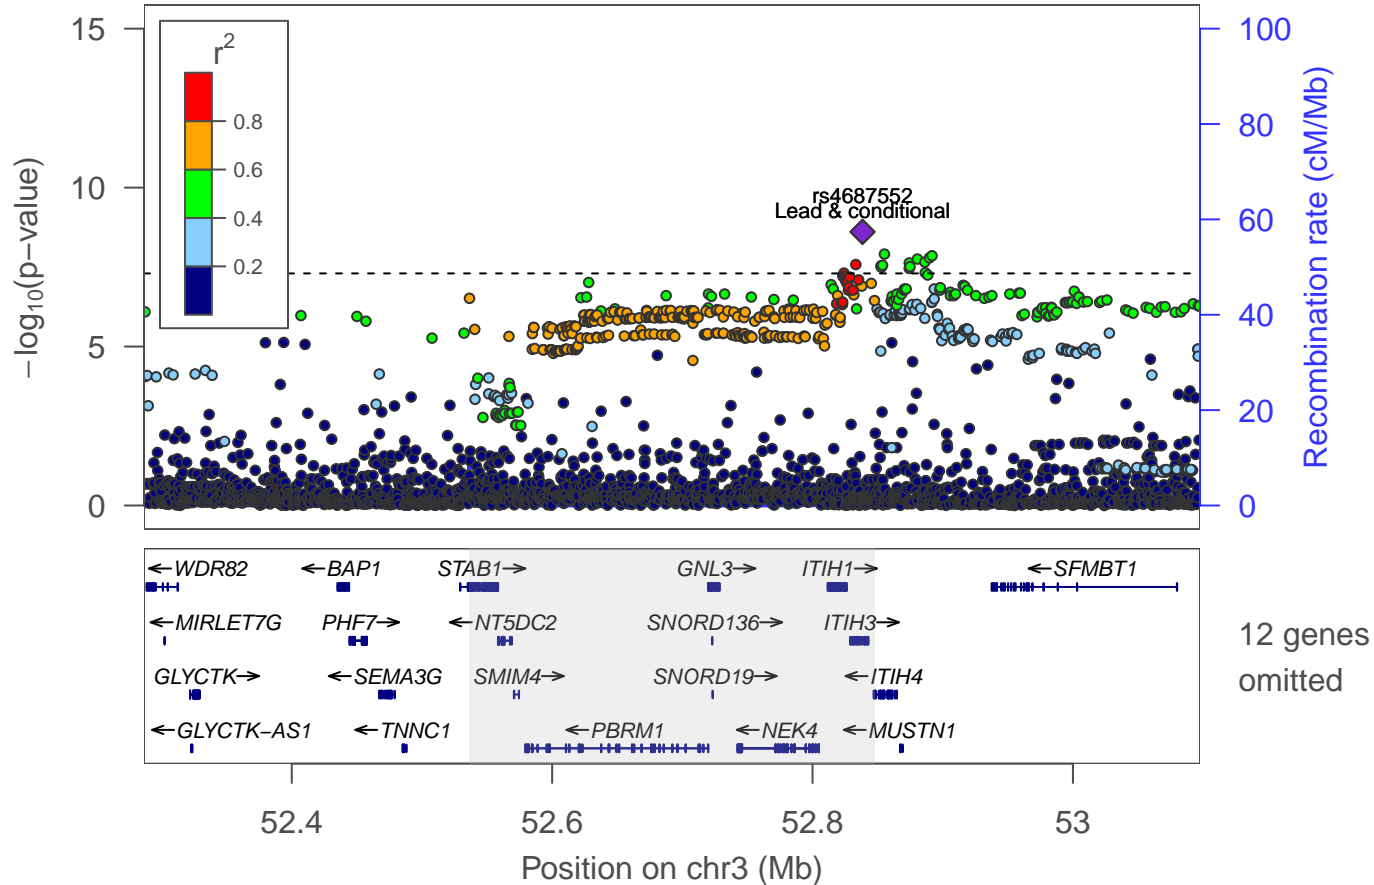

# First PC risky behaviors: locus 22 [chr 3:62.391–62.391Mb]

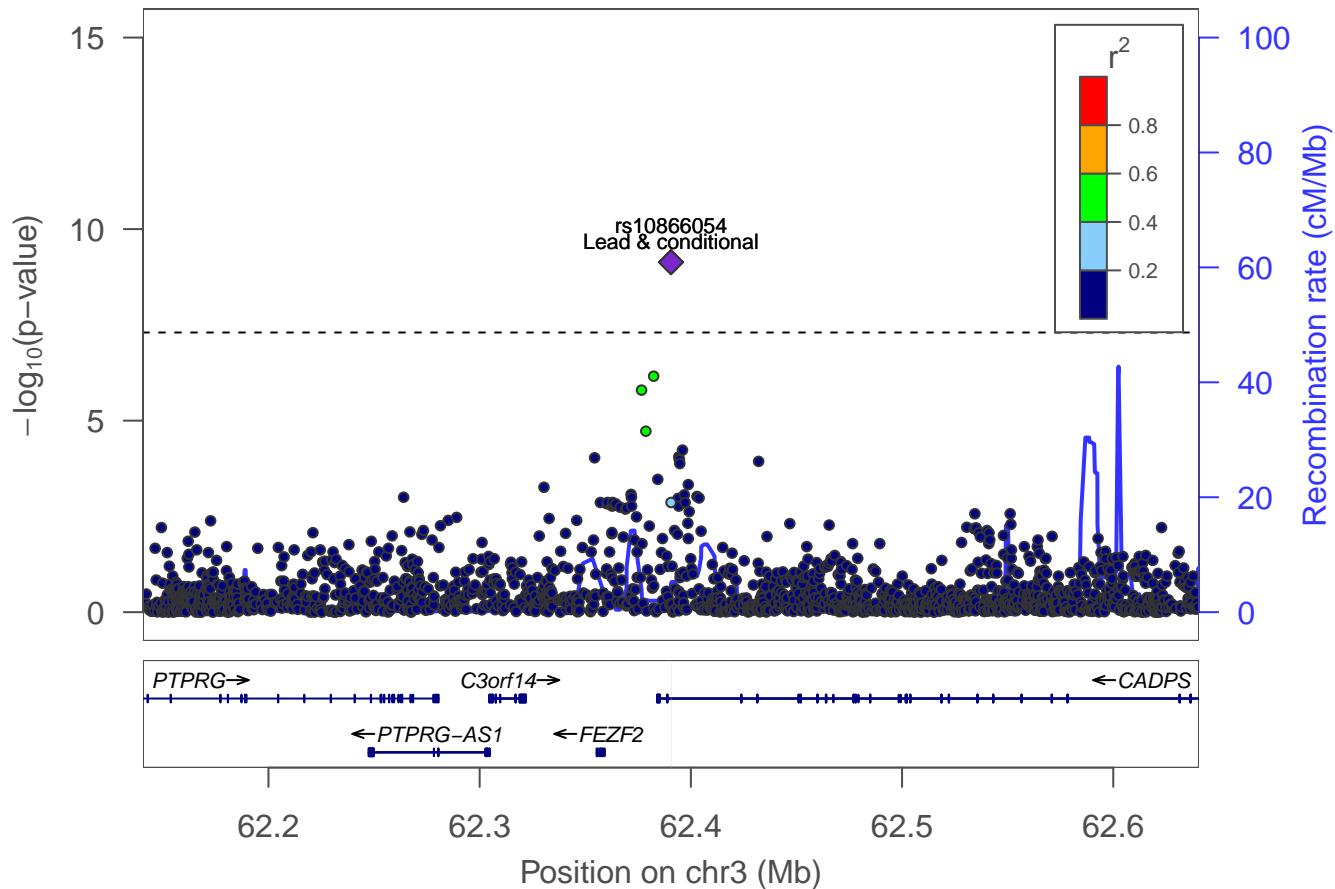

# First PC risky behaviors: locus 23 [chr 3:71.026–71.064Mb]

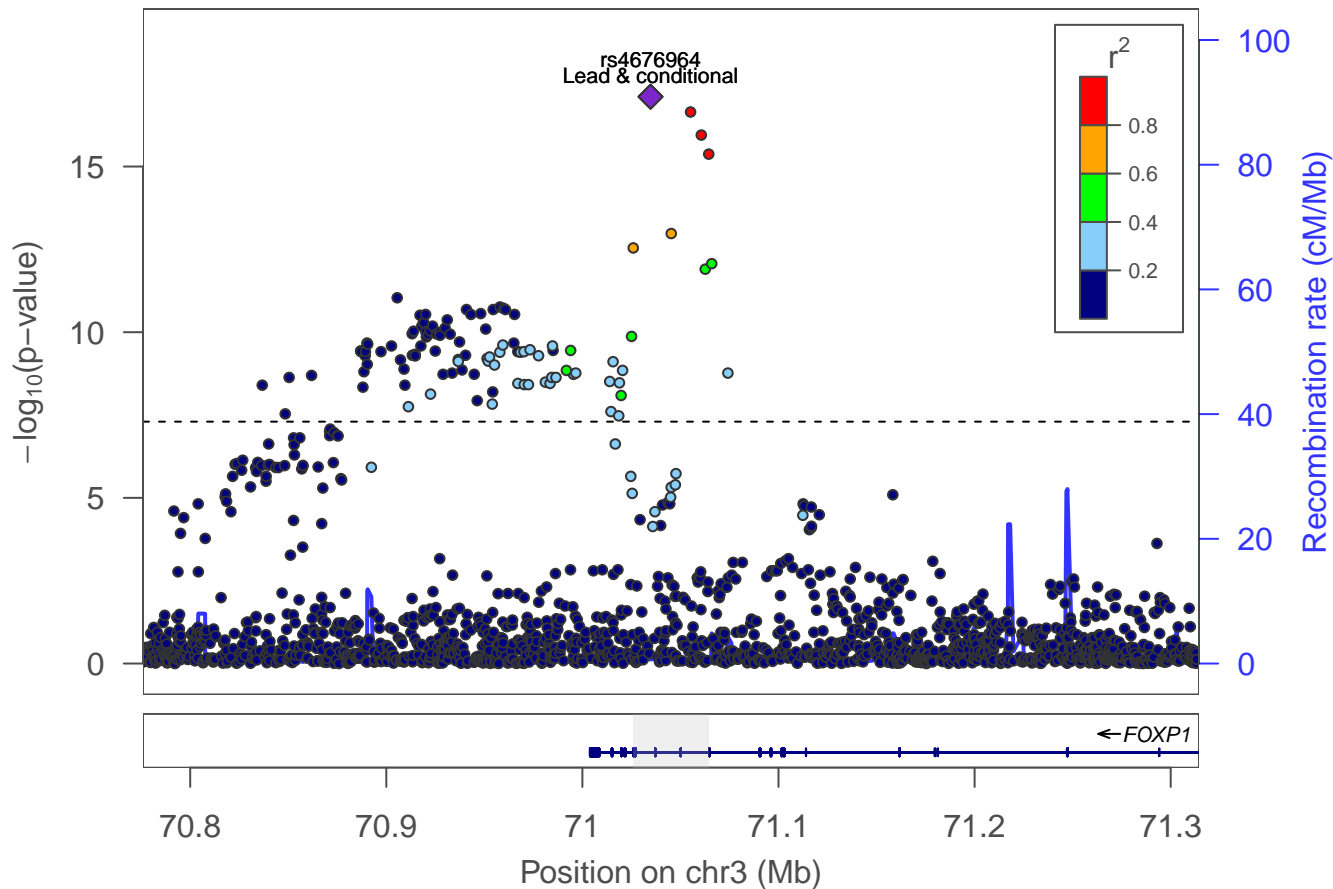

# First PC risky behaviors: locus 24 [chr 3:82.590–82.736Mb]

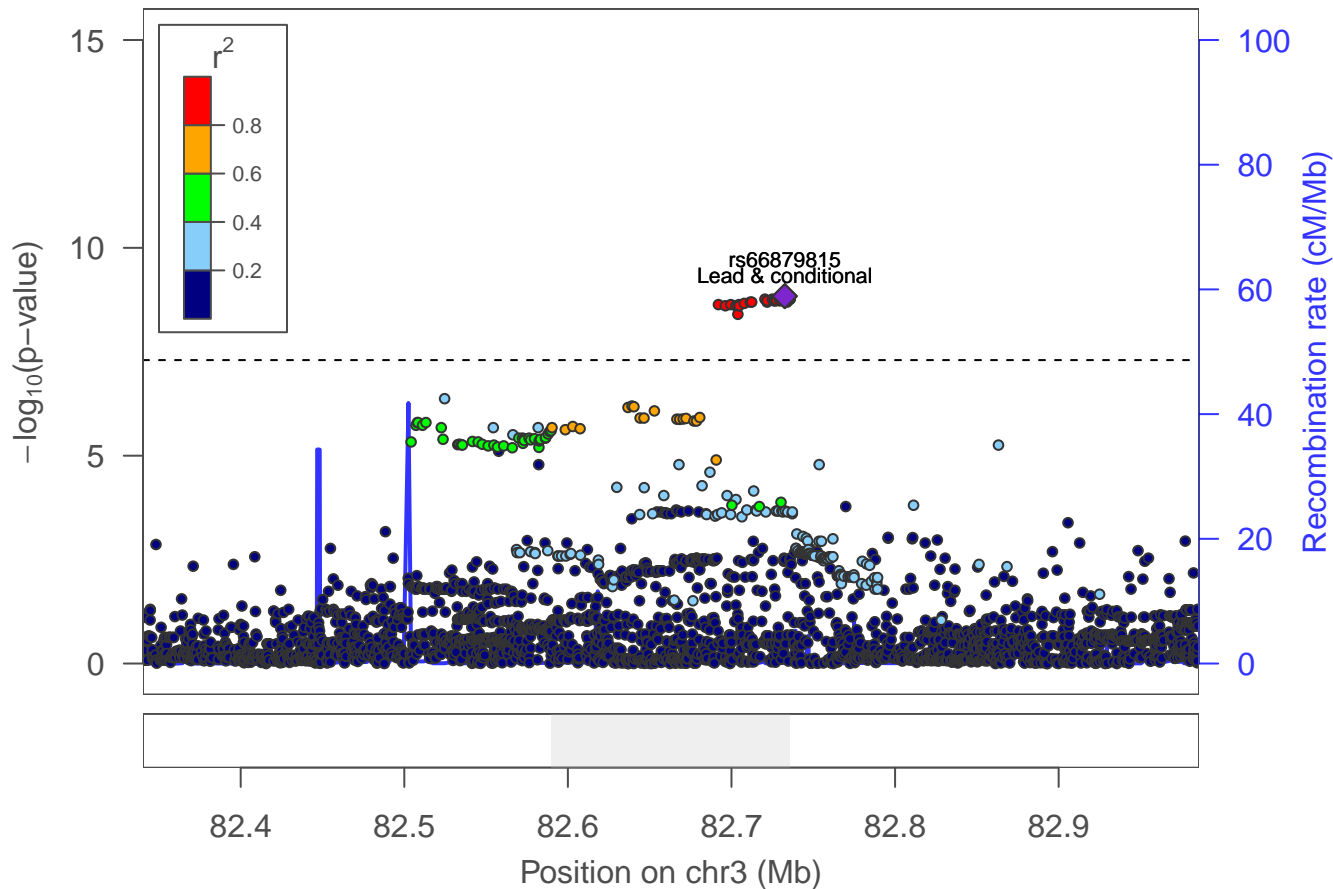



# First PC risky behaviors: Locus 25 [chr 3: 83.536–83.920Mb]

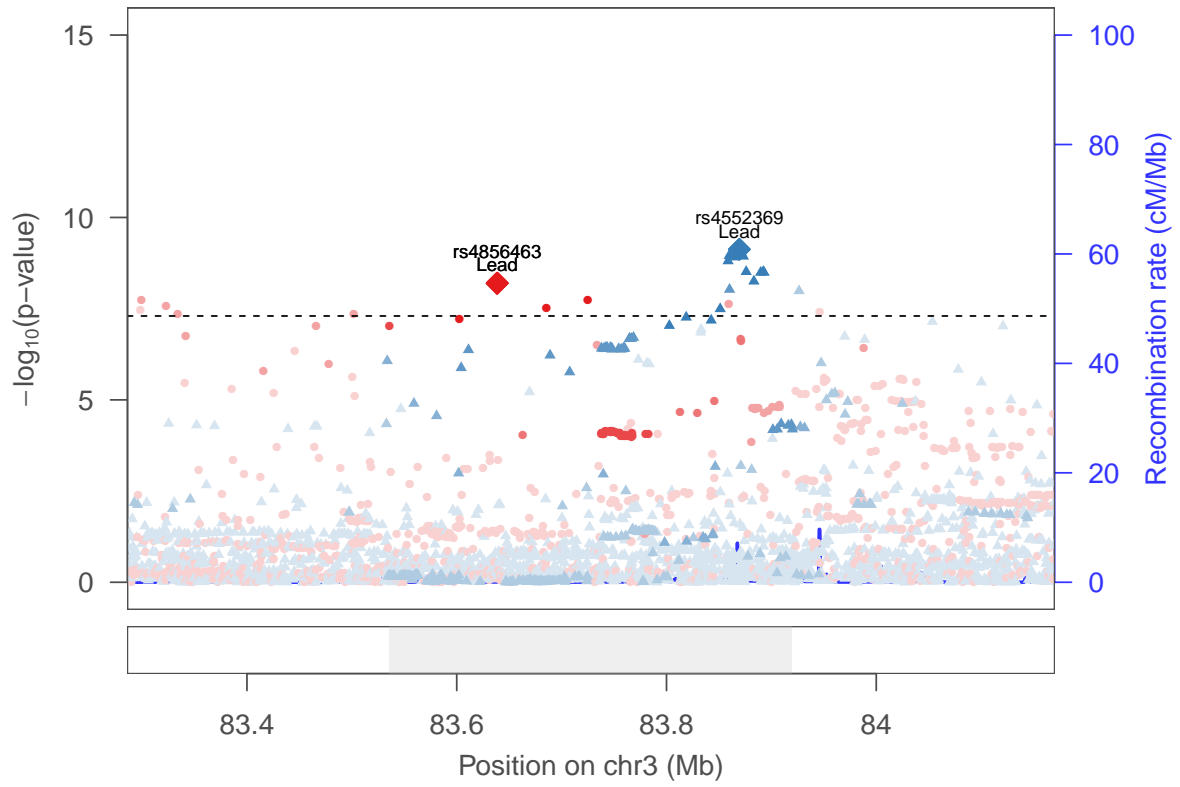

rs4552369 ▲  
rs4856463 ●

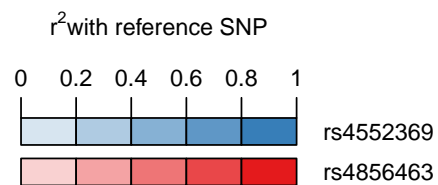

# First PC risky behaviors: Locus 26 [chr 3: 84.899–86.195Mb]

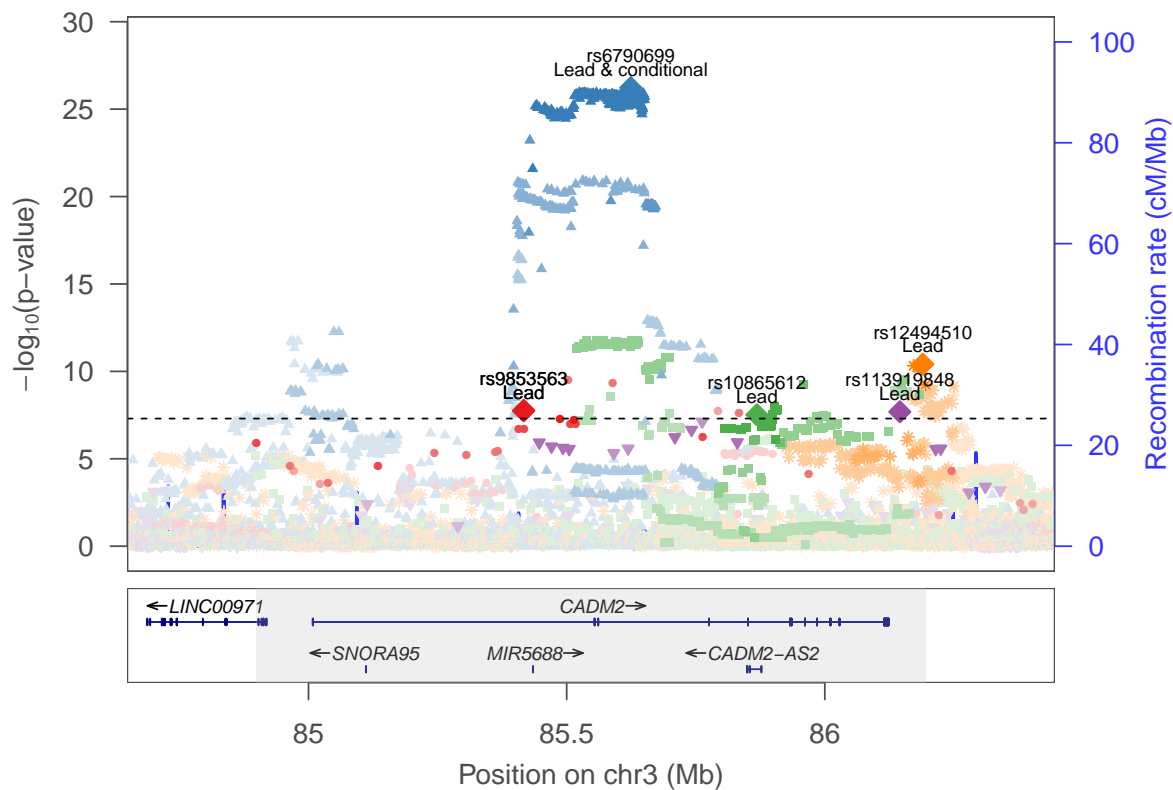

- rs12494510 \* (orange asterisk)
- rs113919848 ▾ (purple inverted triangle)
- rs10865612 ■ (green square)
- rs6790699 ▲ (blue triangle)
- rs9853563 ● (red circle)

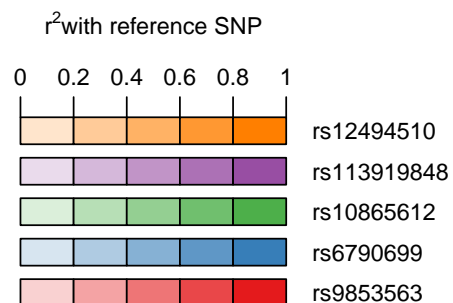

# First PC risky behaviors: locus 27 [chr 3:94.590–94.808Mb]

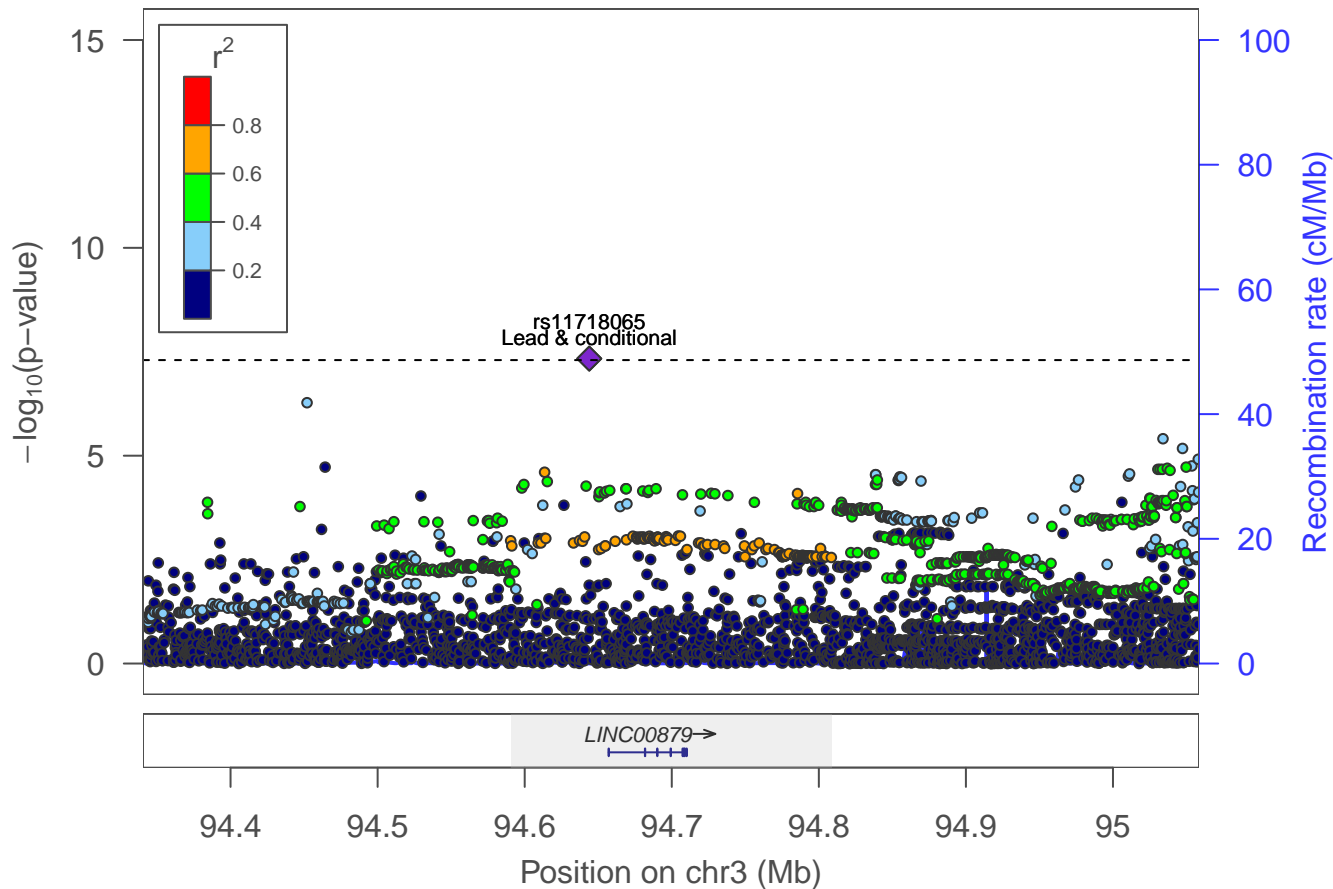

# First PC risky behaviors: locus 28 [chr 3:100.893–101.206Mb]

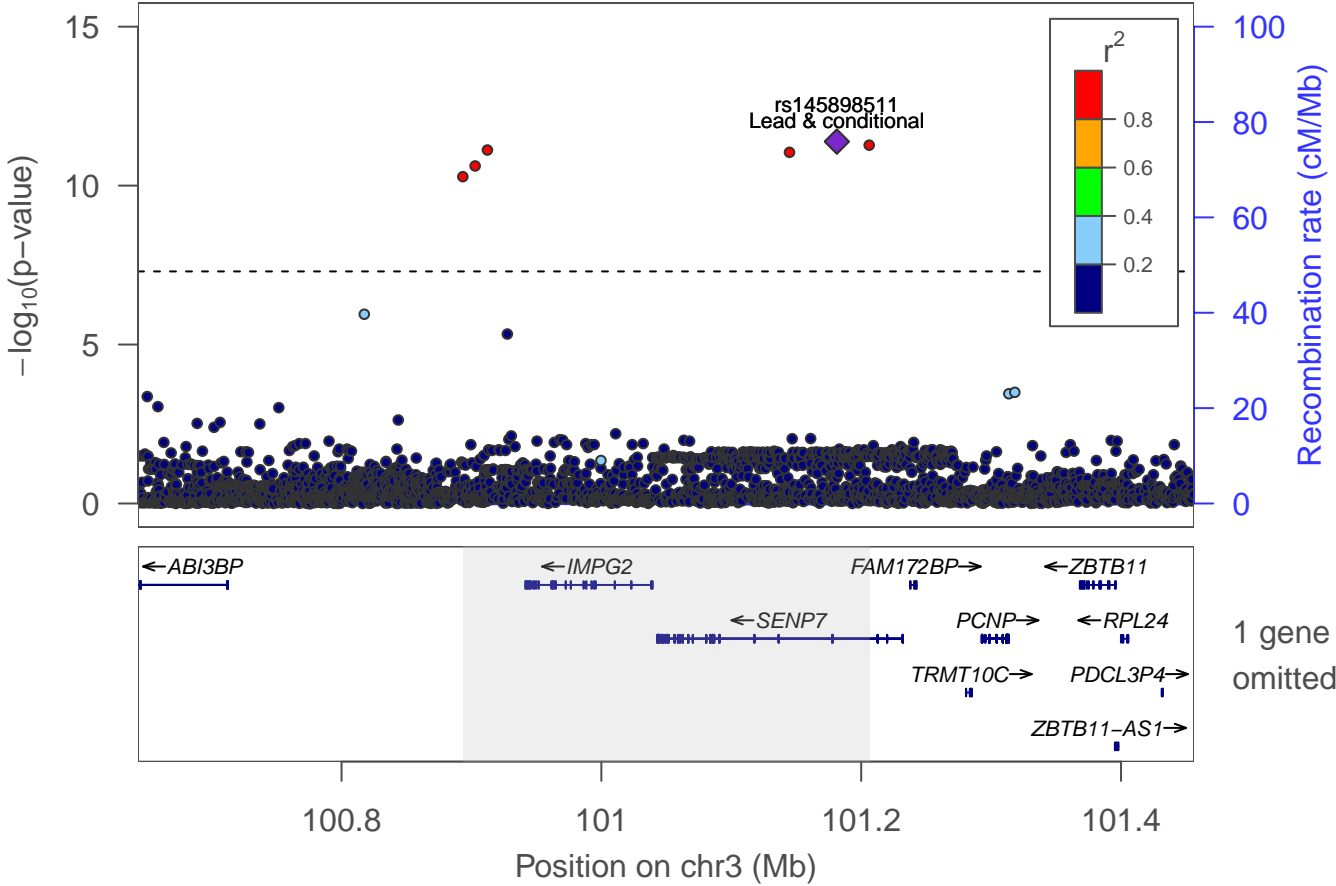

# First PC risky behaviors: Locus 29 [chr 3: 117.347–117.822Mb]

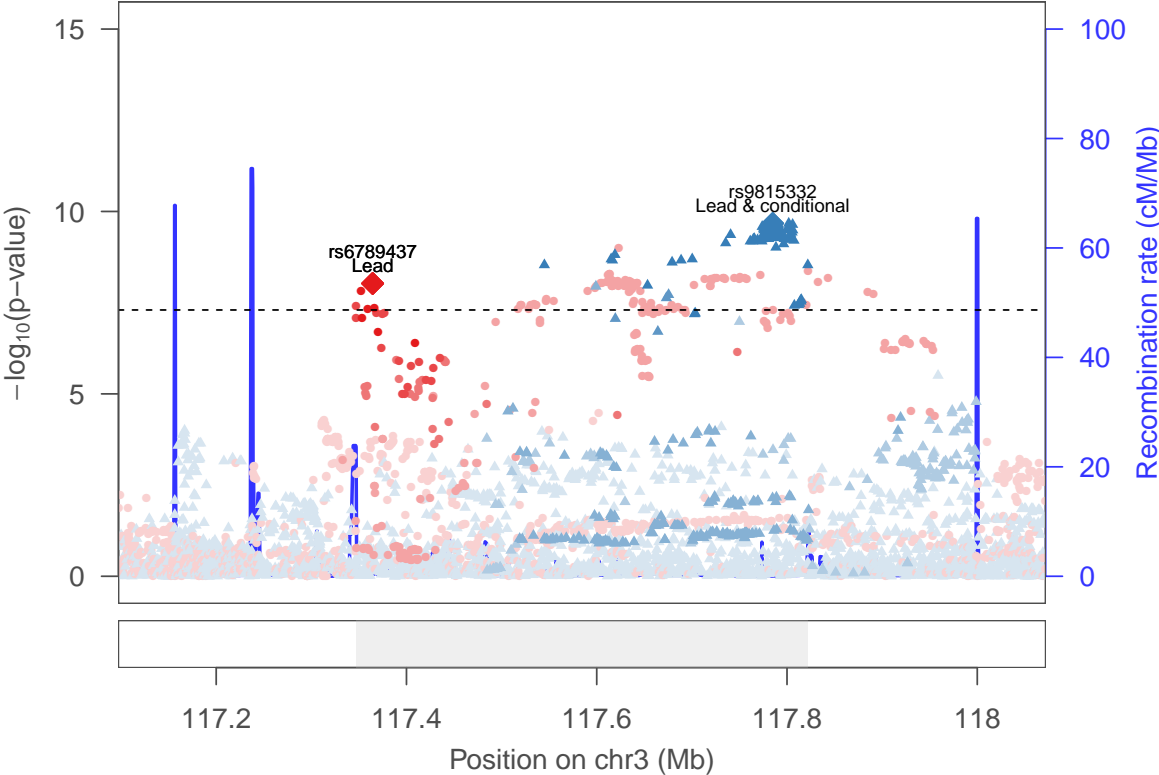

rs9815332 ▲  
rs6789437 ●

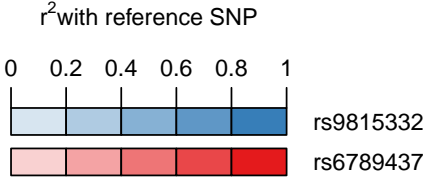

# First PC risky behaviors: locus 30 [chr 3:127.166–127.190Mb]

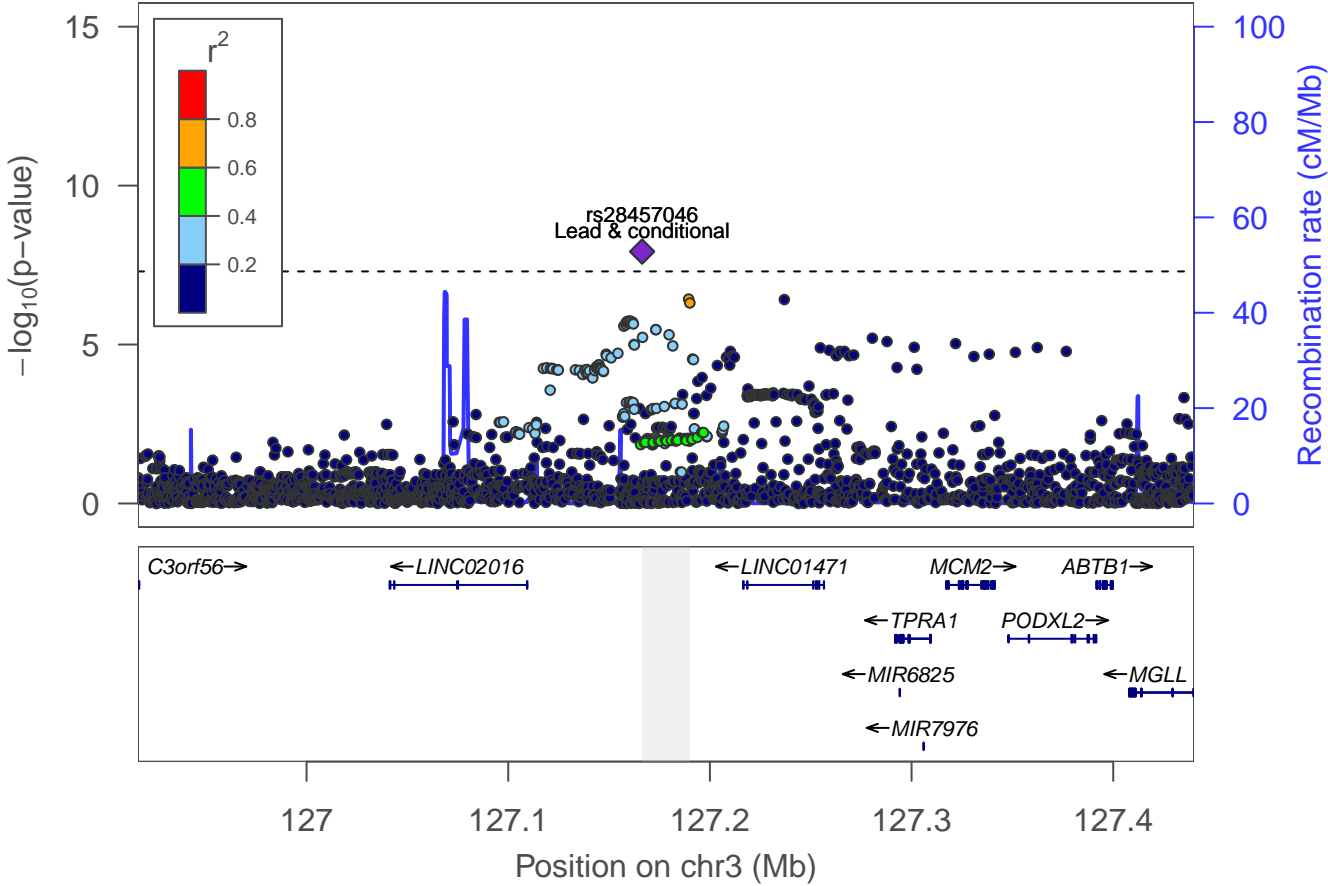

# First PC risky behaviors: Locus 31 [chr 3: 146.862–147.141Mb]

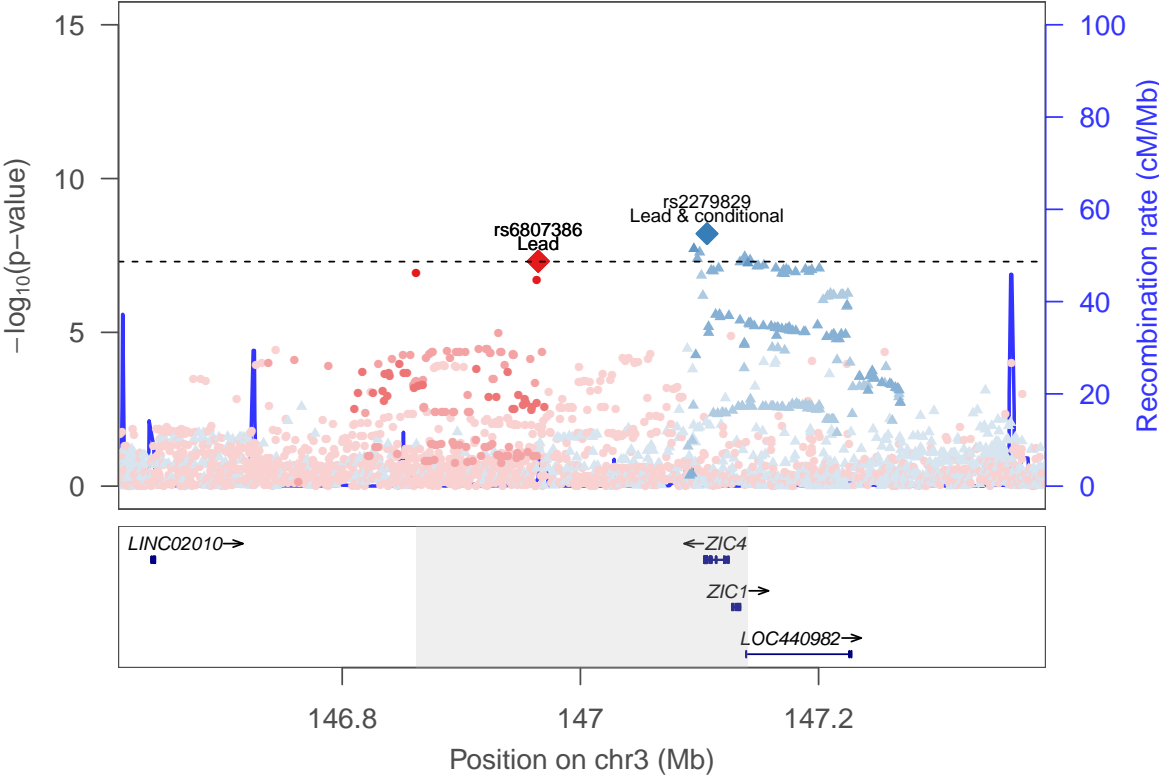

rs2279829 ▲  
rs6807386 ●

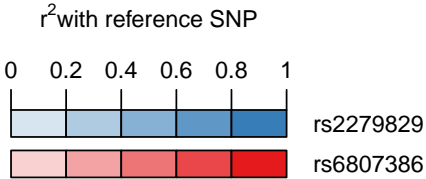

# First PC risky behaviors: locus 32 [chr 4:47.272–47.272Mb]

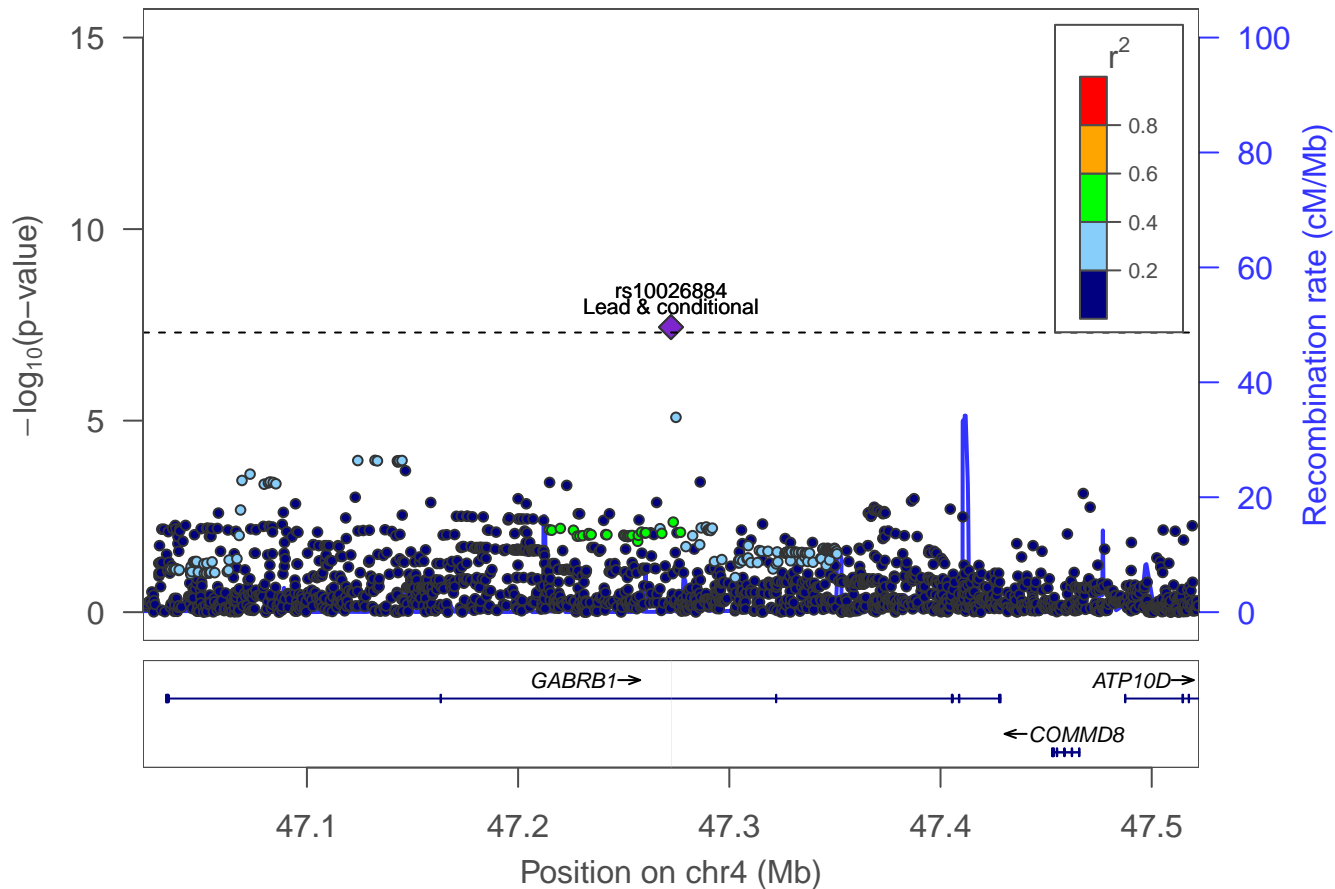



# First PC risky behaviors: locus 33 [chr 4:57.710–57.893Mb]

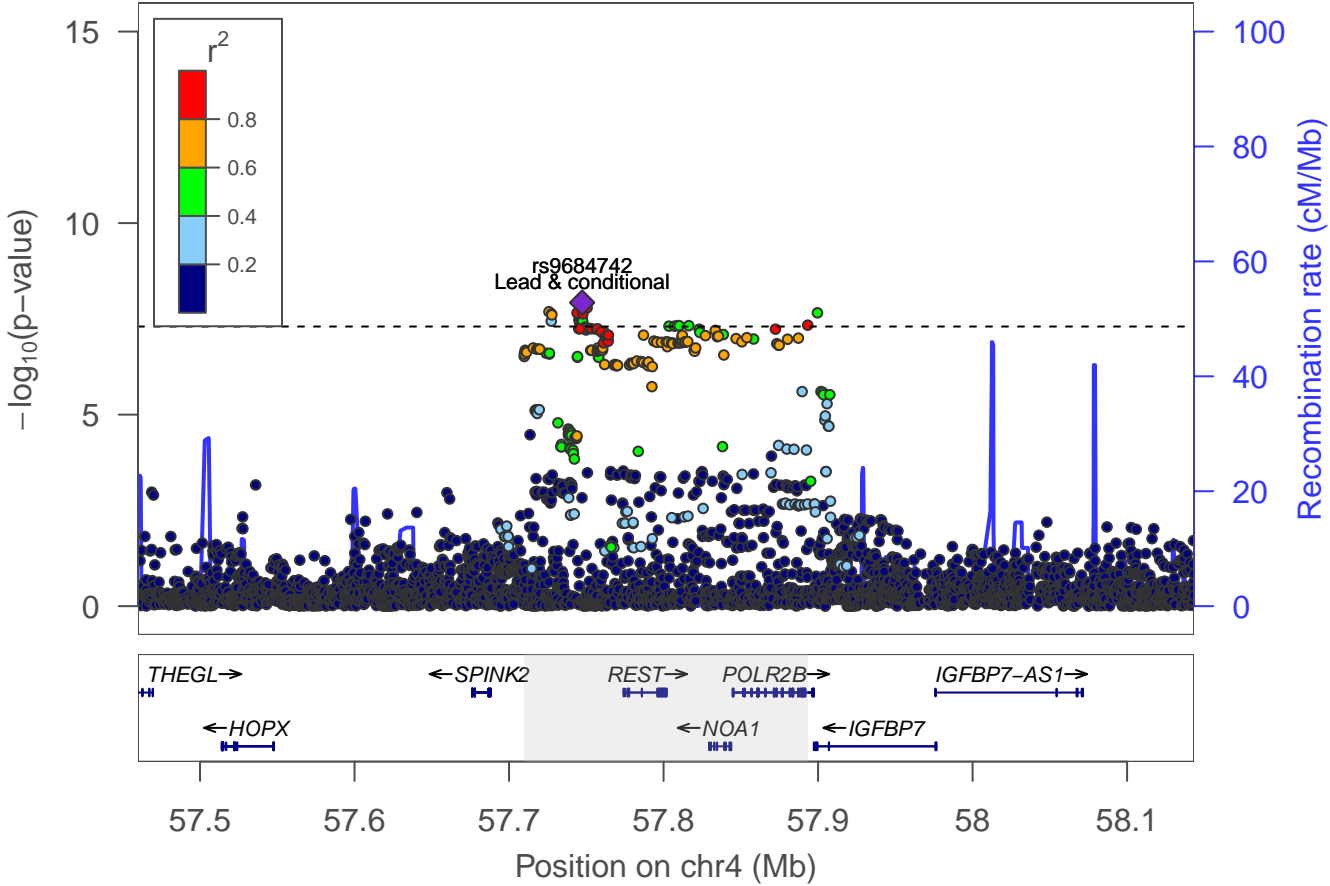

# First PC risky behaviors: locus 34 [chr 4:100.239–100.239Mb]

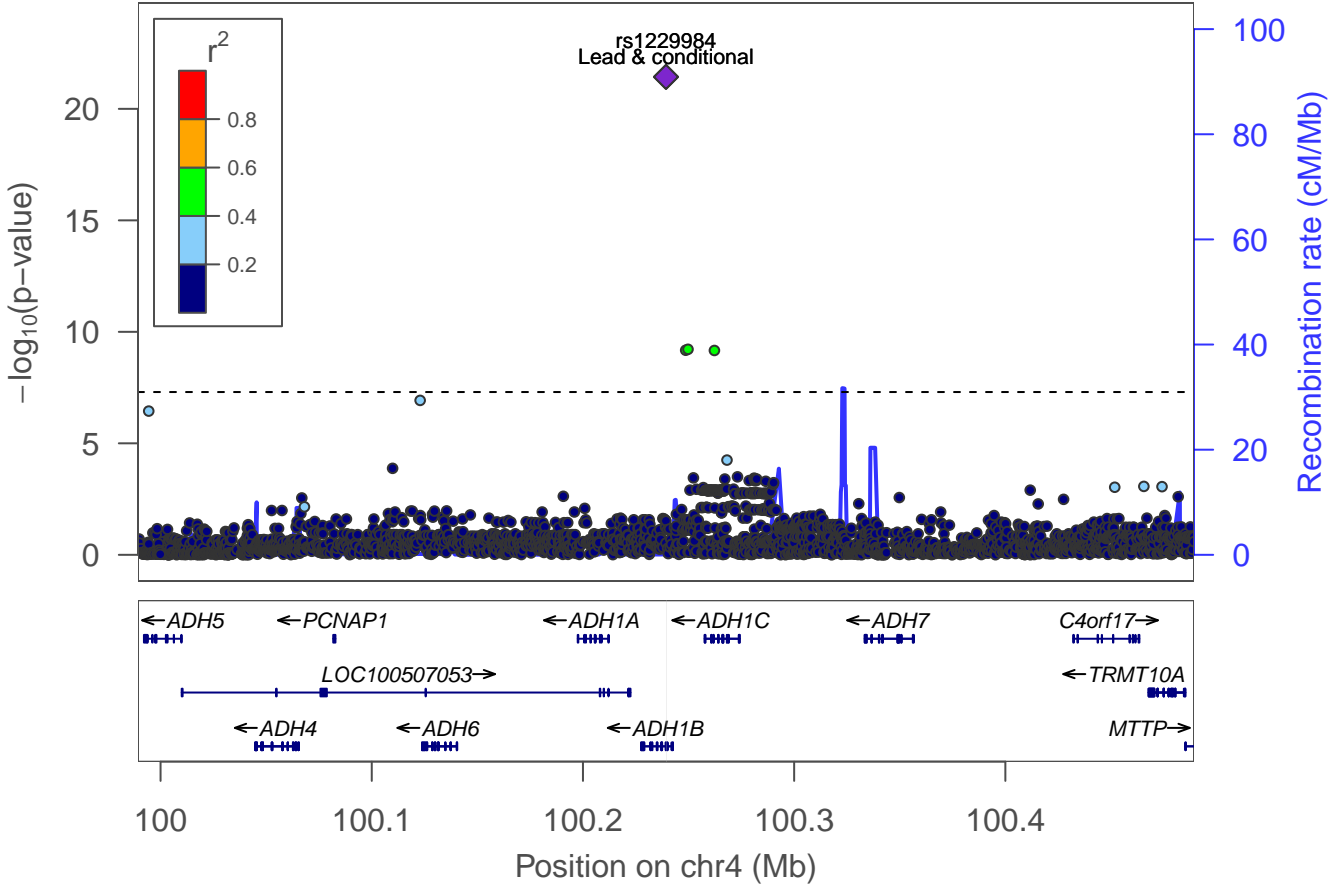

# First PC risky behaviors: locus 35 [chr 4:103.002–103.198Mb]

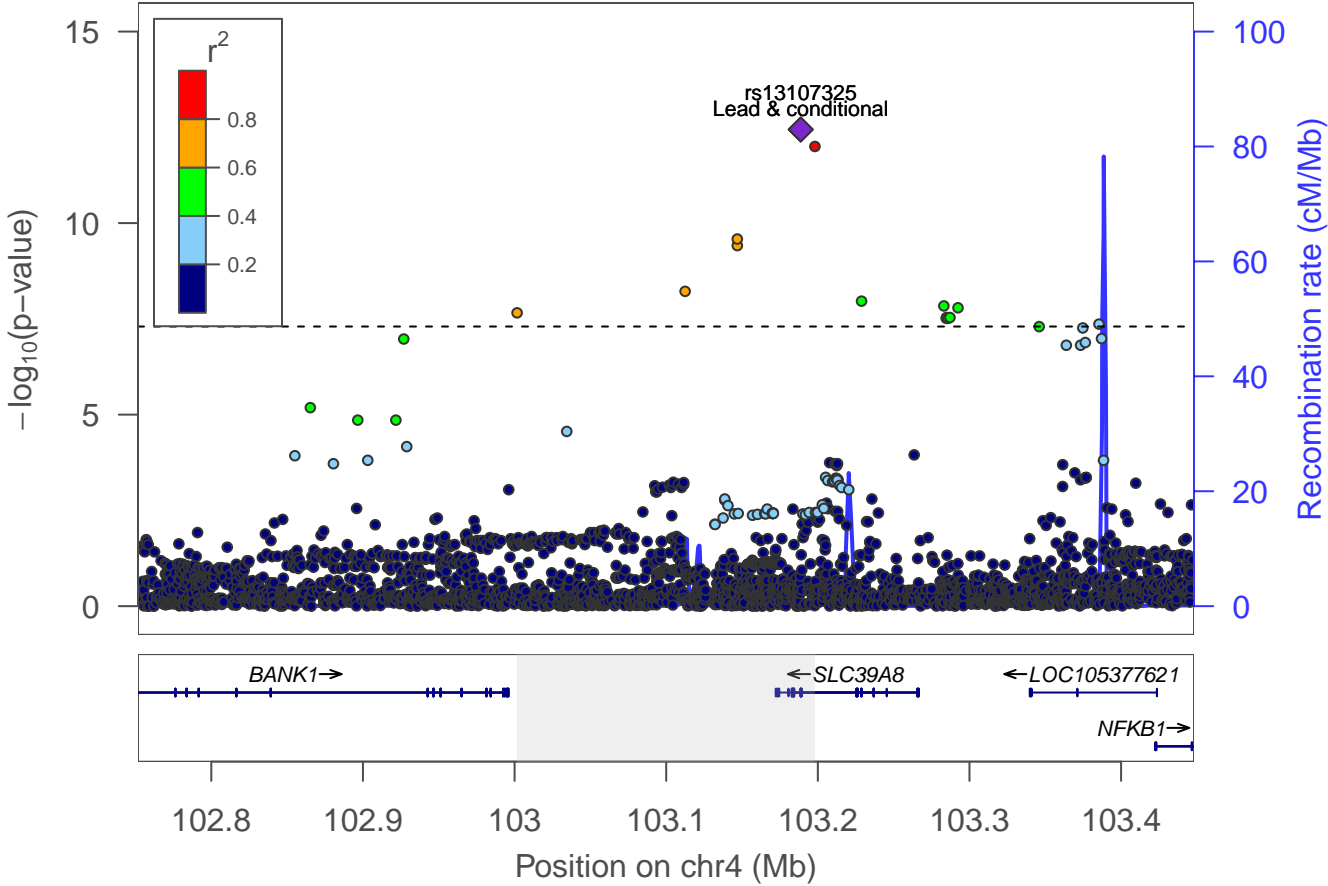

# First PC risky behaviors: Locus 36 [chr 4: 106.048–106.272Mb]

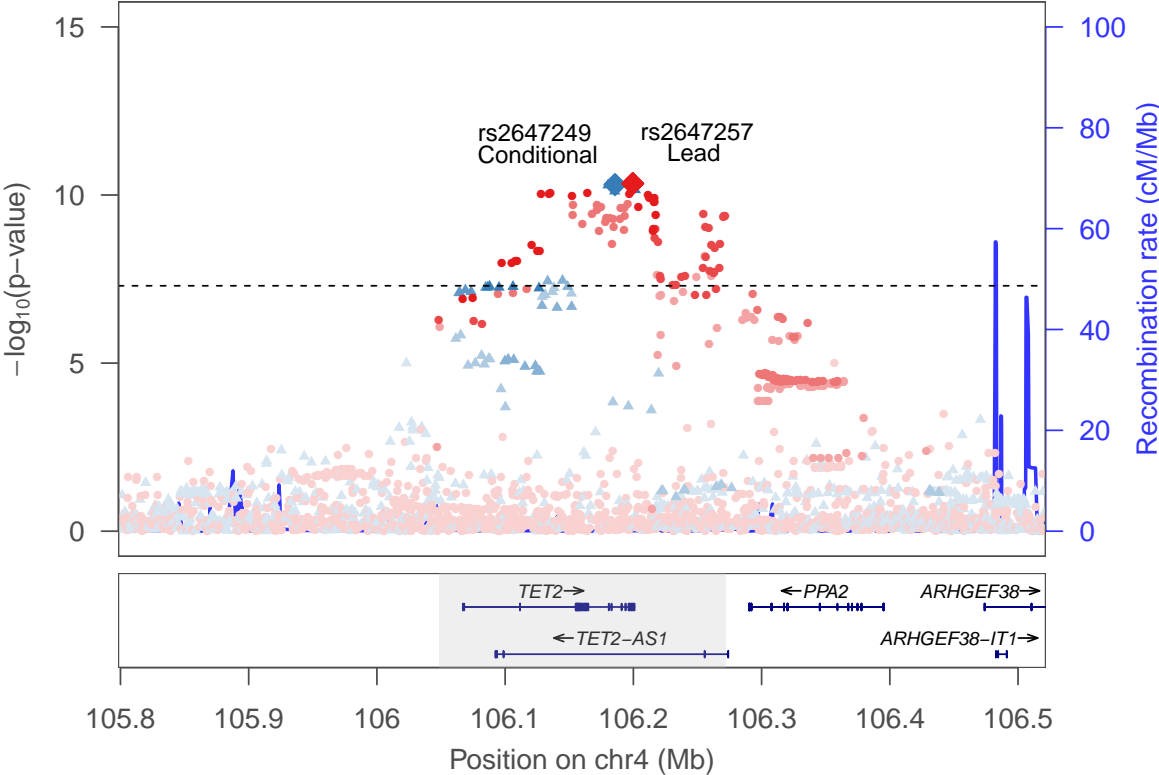

rs2647249 ▲  
rs2647257 ●

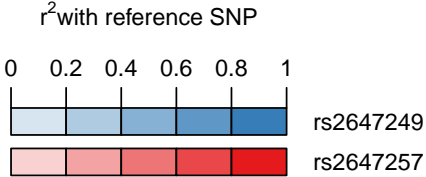

# First PC risky behaviors: locus 37 [chr 4:110.515–110.648Mb]

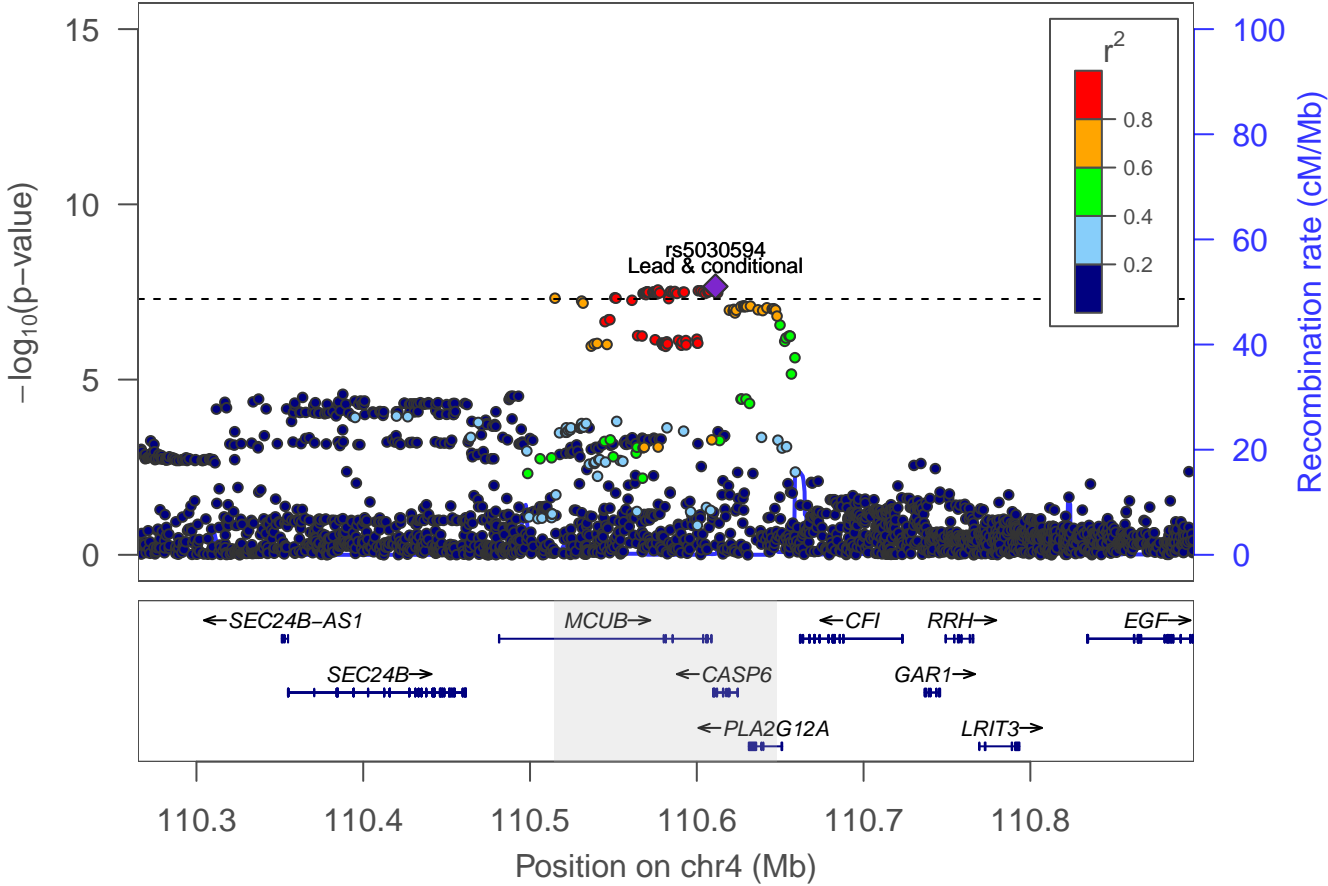

# First PC risky behaviors: locus 38 [chr 4:143.510–143.655Mb]

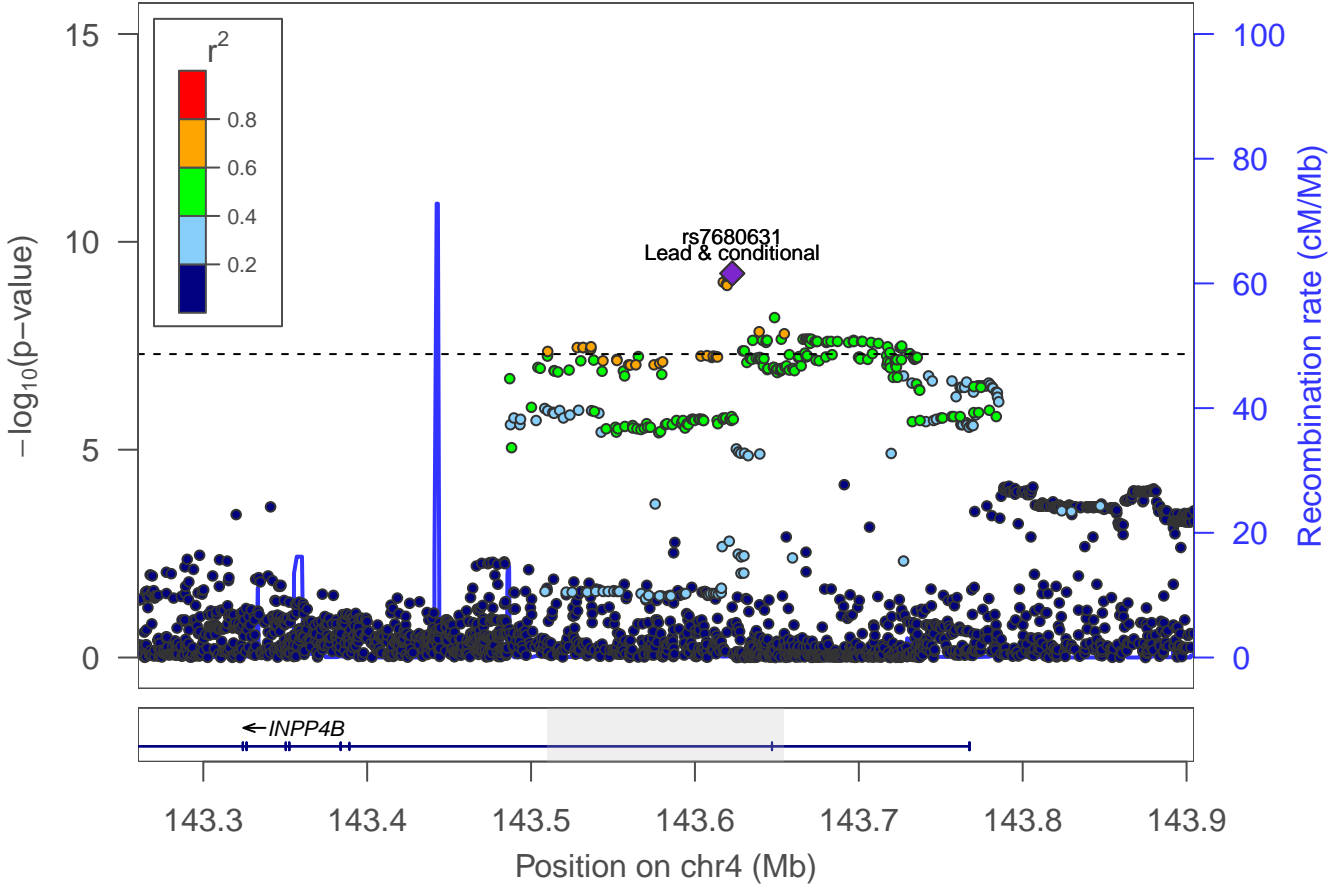

# First PC risky behaviors: locus 39 [chr 5:50.584–50.800Mb]

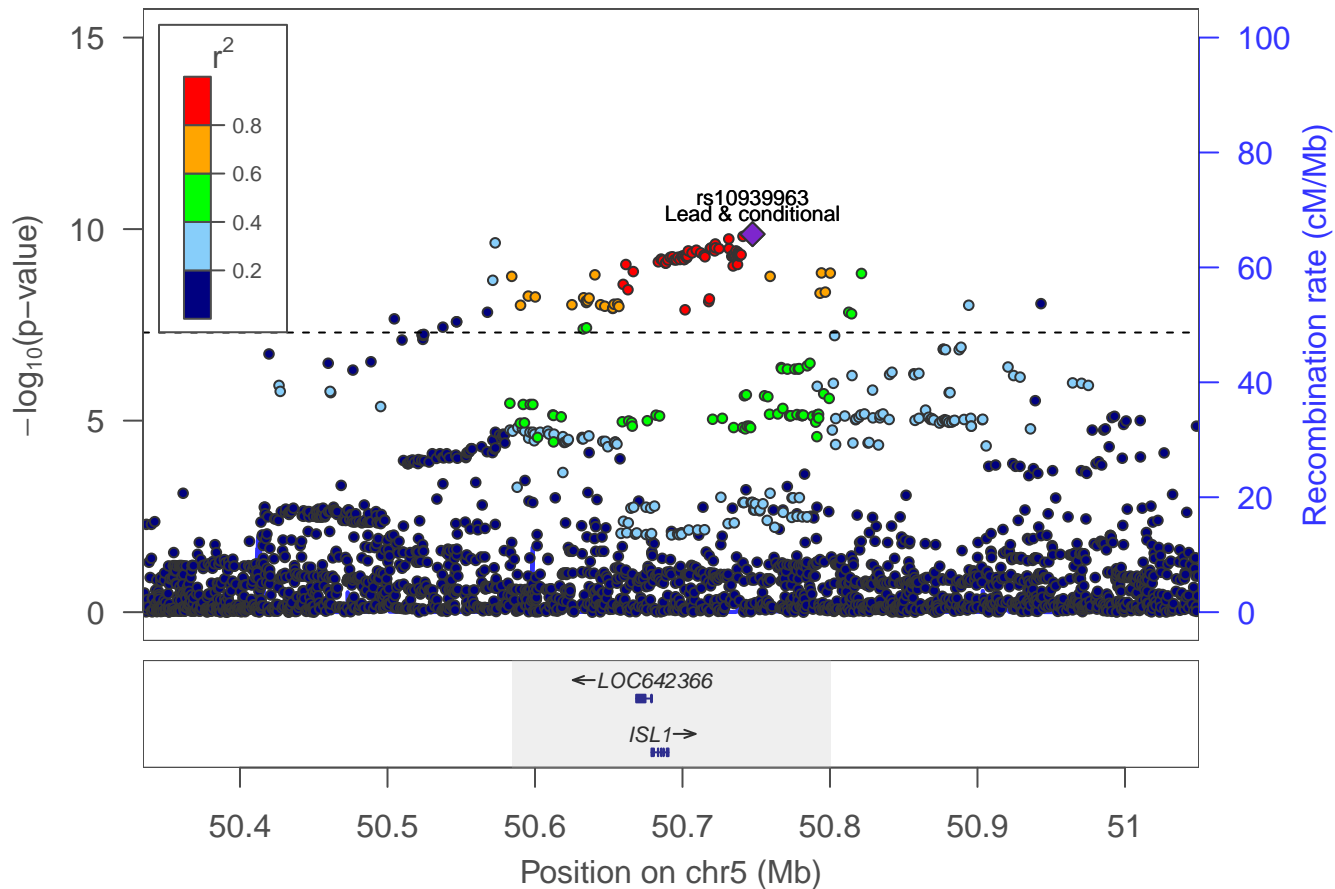

# First PC risky behaviors: locus 40 [chr 5:80.241–80.263Mb]

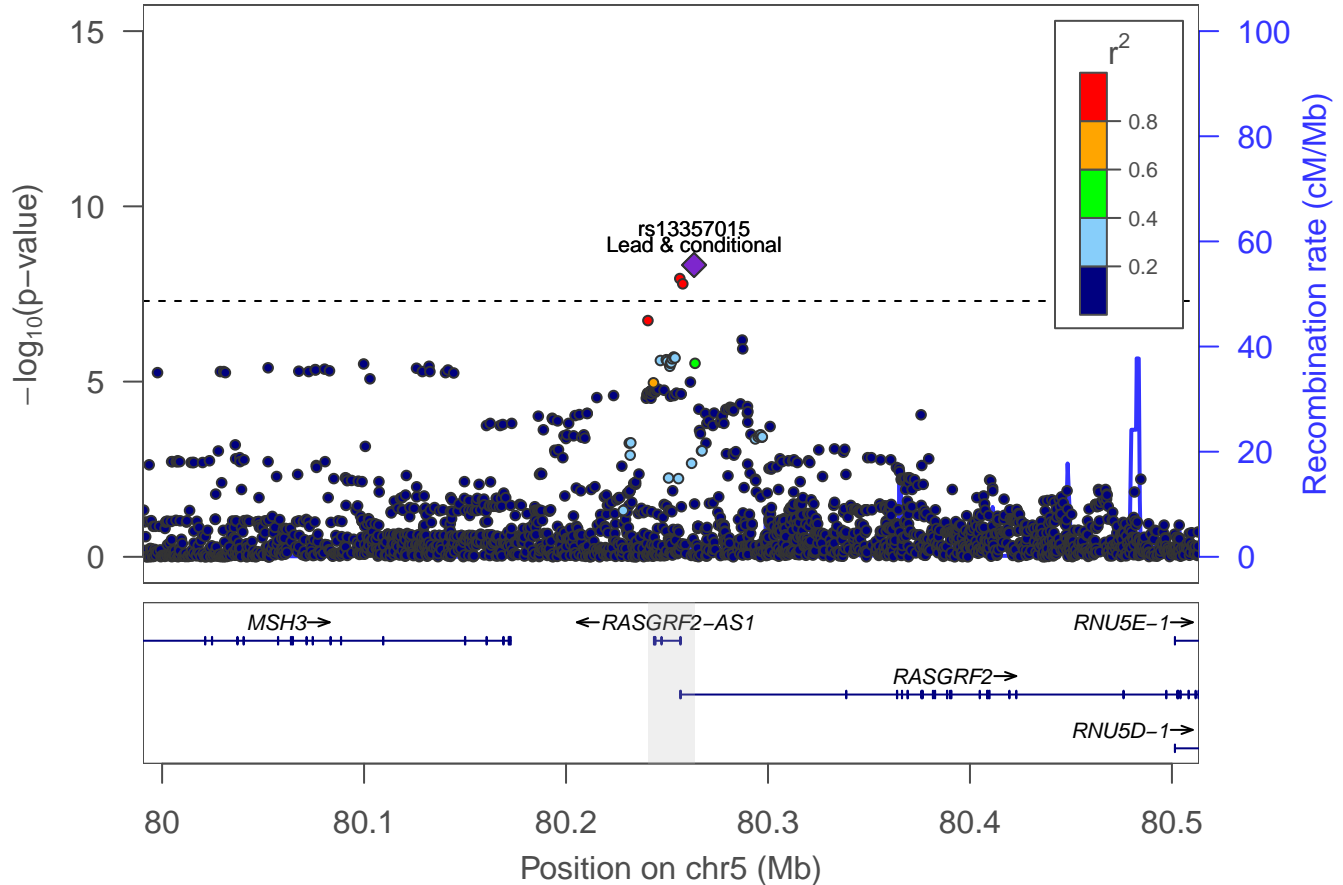



# First PC risky behaviors: locus 41 [chr 5:103.791–104.049Mb]

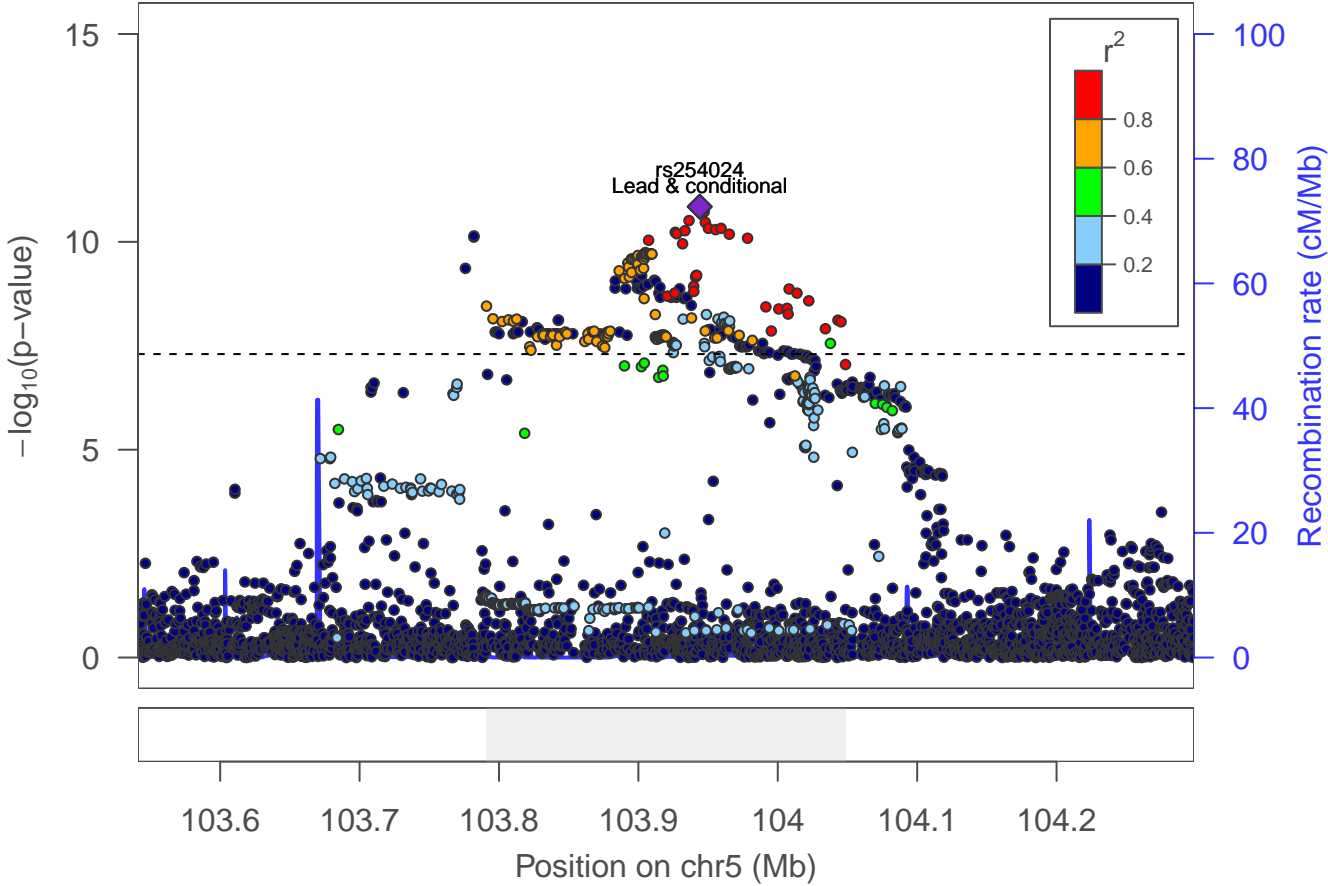

# First PC risky behaviors: locus 42 [chr 5:166.985–167.056Mb]

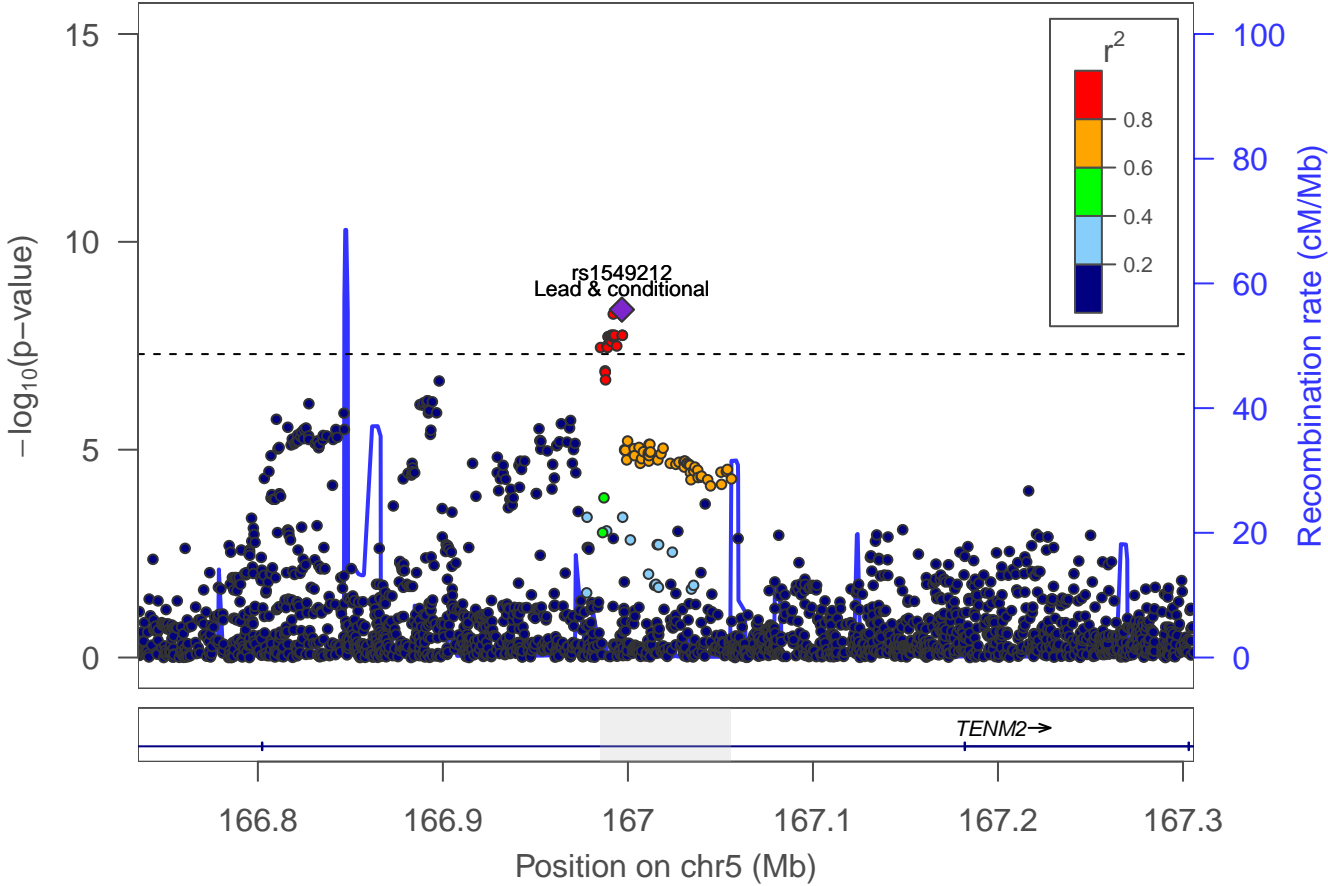

# First PC risky behaviors: locus 43 [chr 5:173.273–173.369Mb]

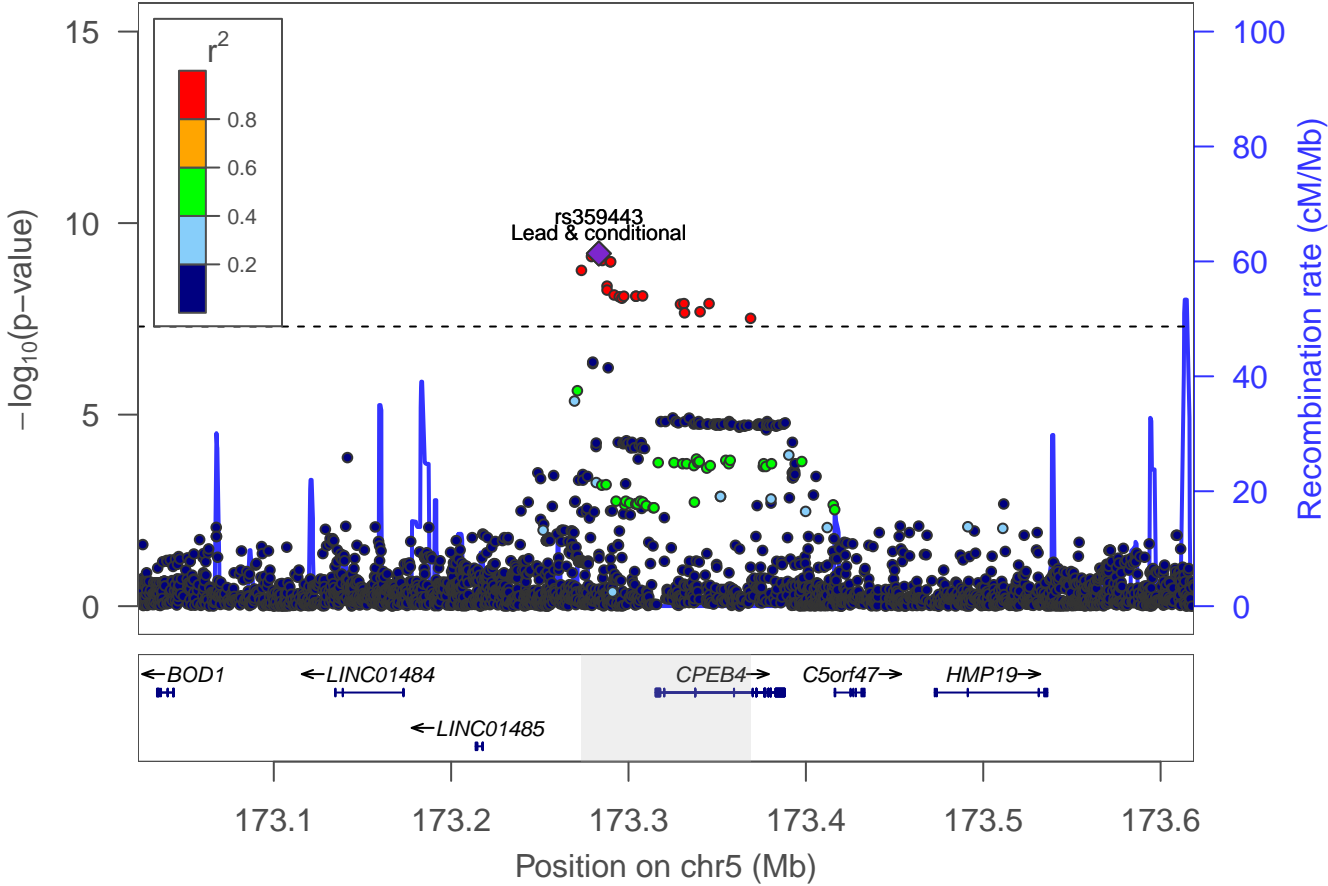

# First PC risky behaviors: locus 44 [chr 6:28.271–28.657Mb]

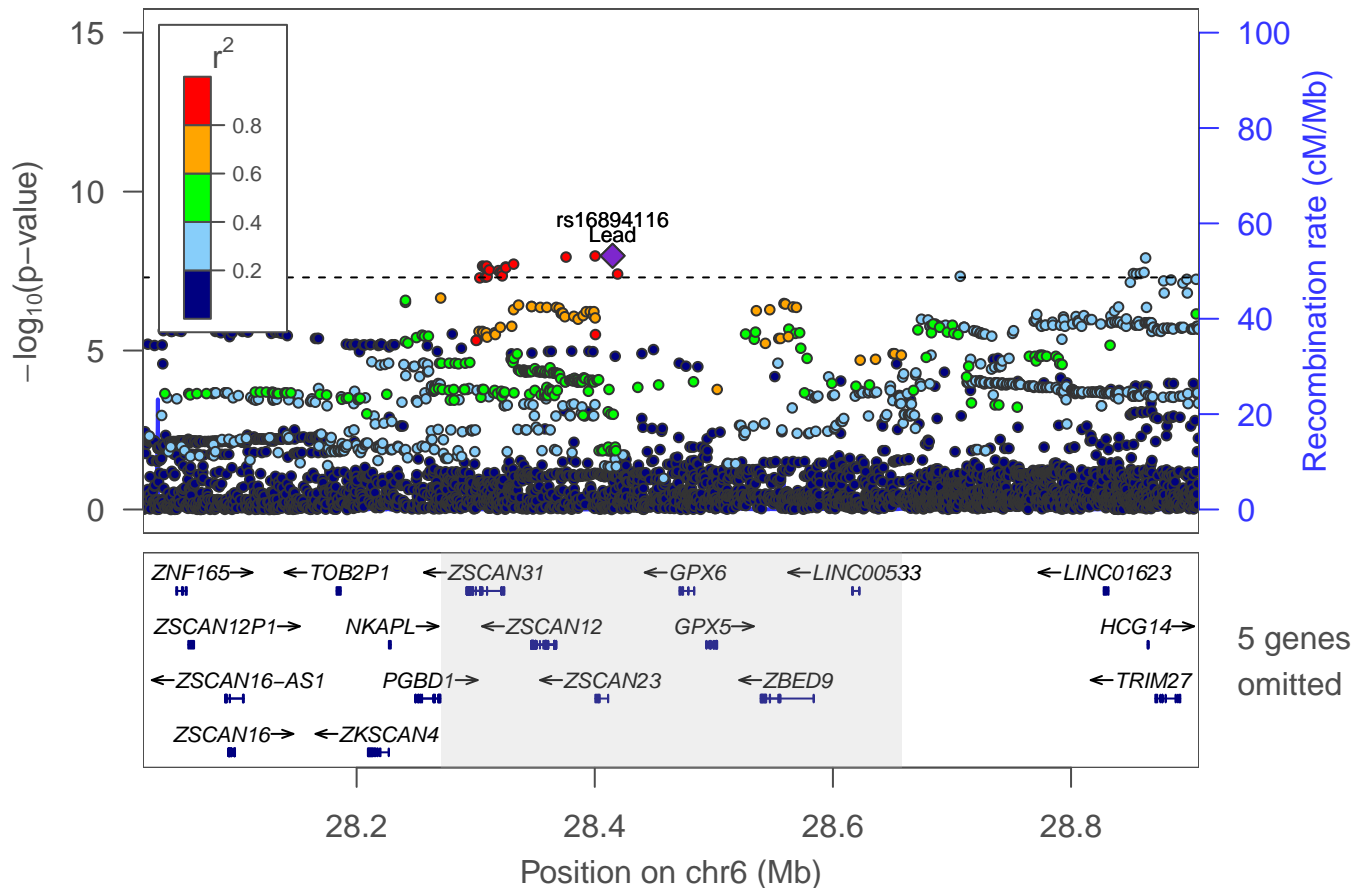

# First PC risky behaviors: locus 45 [chr 6:30.243–30.296Mb]

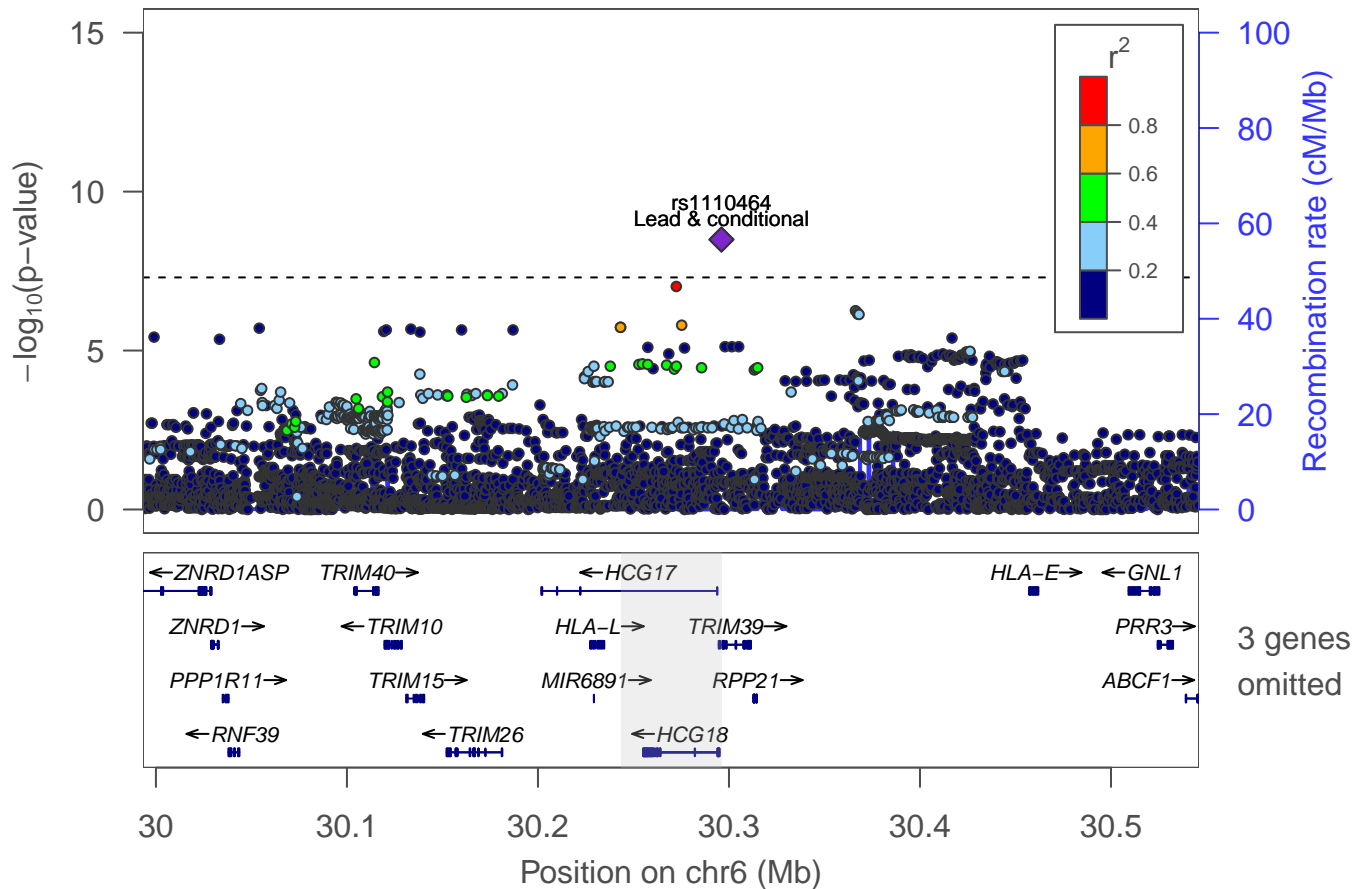

# First PC risky behaviors: locus 46 [chr 6:32.107–32.146Mb]

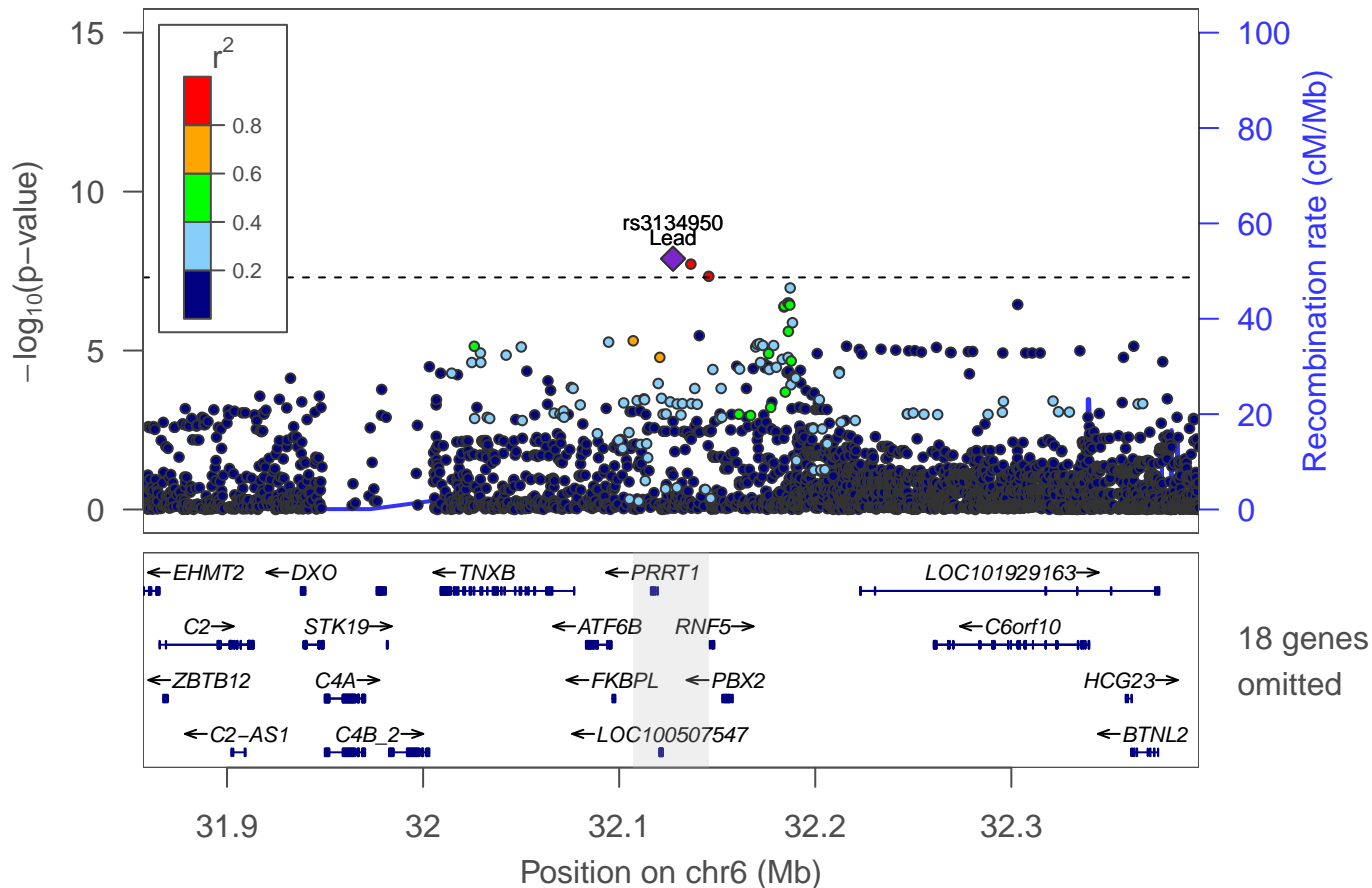

# First PC risky behaviors: Locus 47 [chr 6: 98.479–98.592Mb]

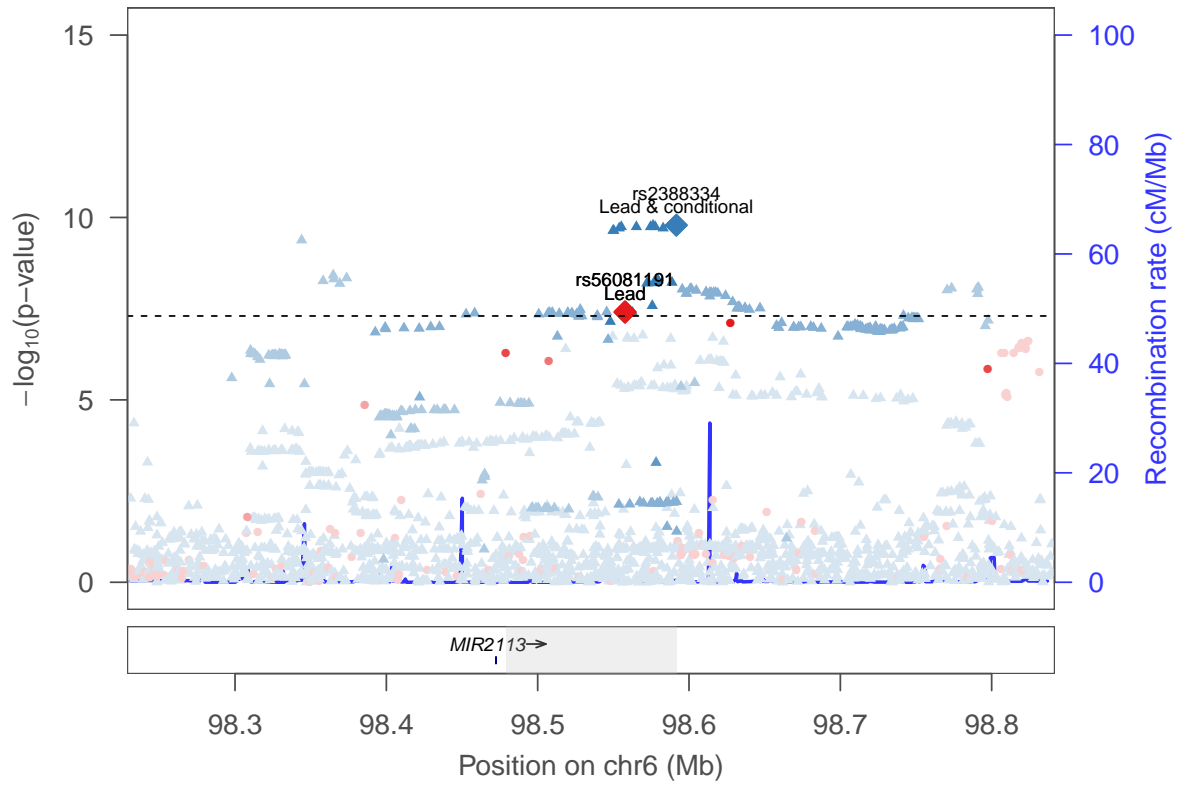

rs2388334 ▲  
rs56081191 ●

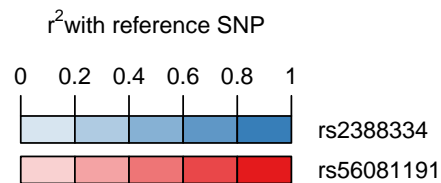

# First PC risky behaviors: locus 48 [chr 6:111.578–111.887Mb]

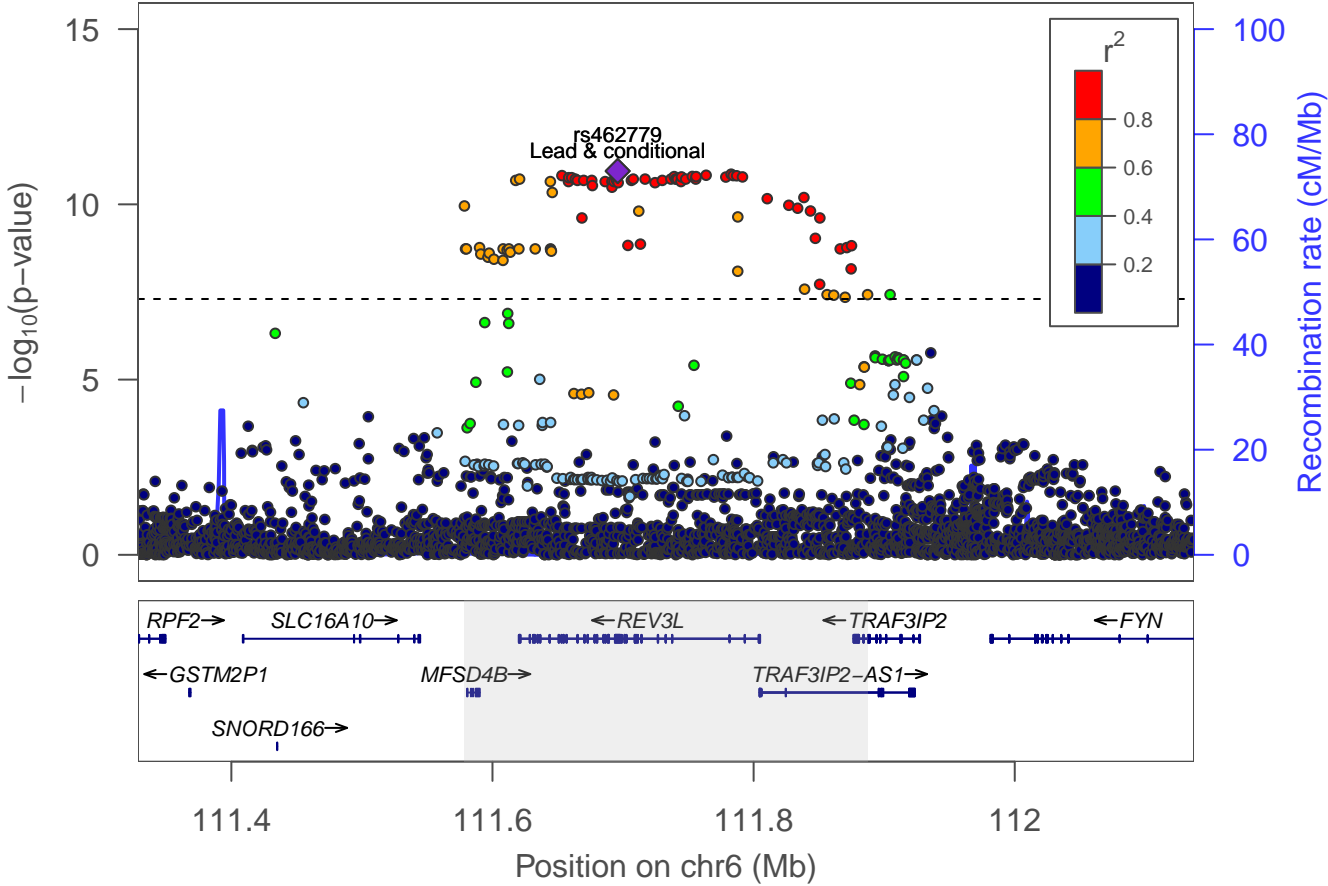



# First PC risky behaviors: locus 49 [chr 7:1.852–1.982Mb]

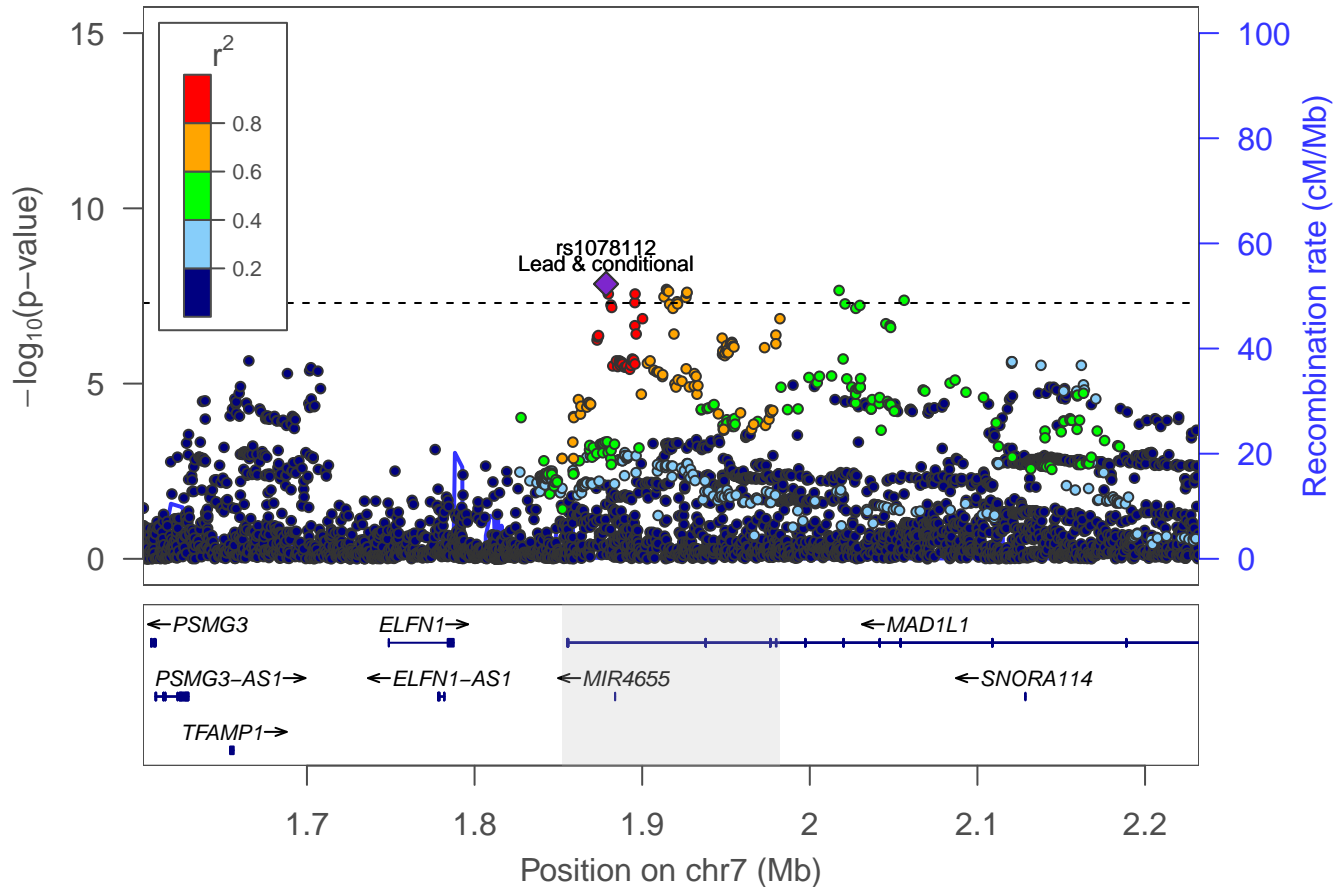

# First PC risky behaviors: locus 50 [chr 7:3.526–3.623Mb]

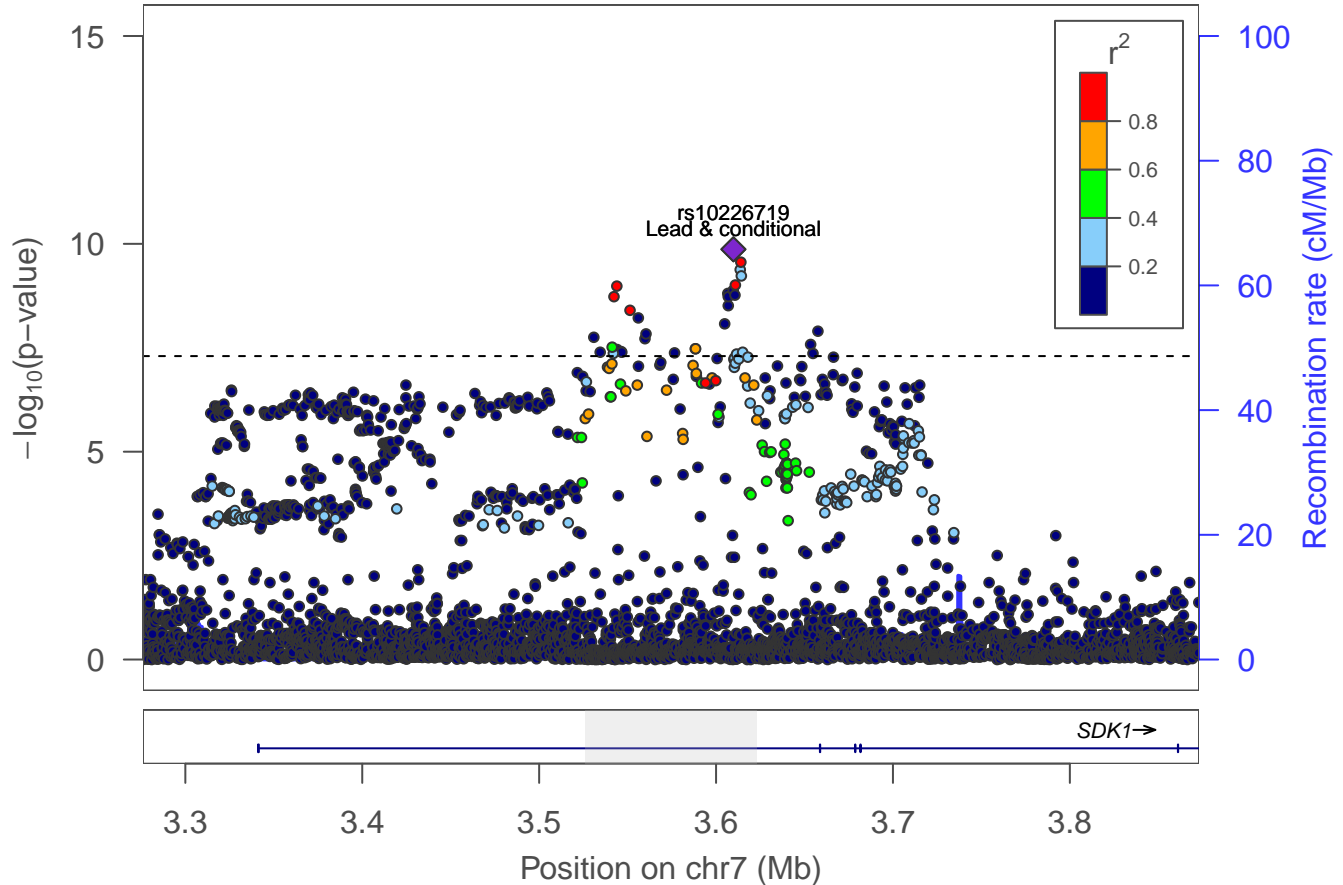

# First PC risky behaviors: locus 51 [chr 7:114.963–115.113Mb]

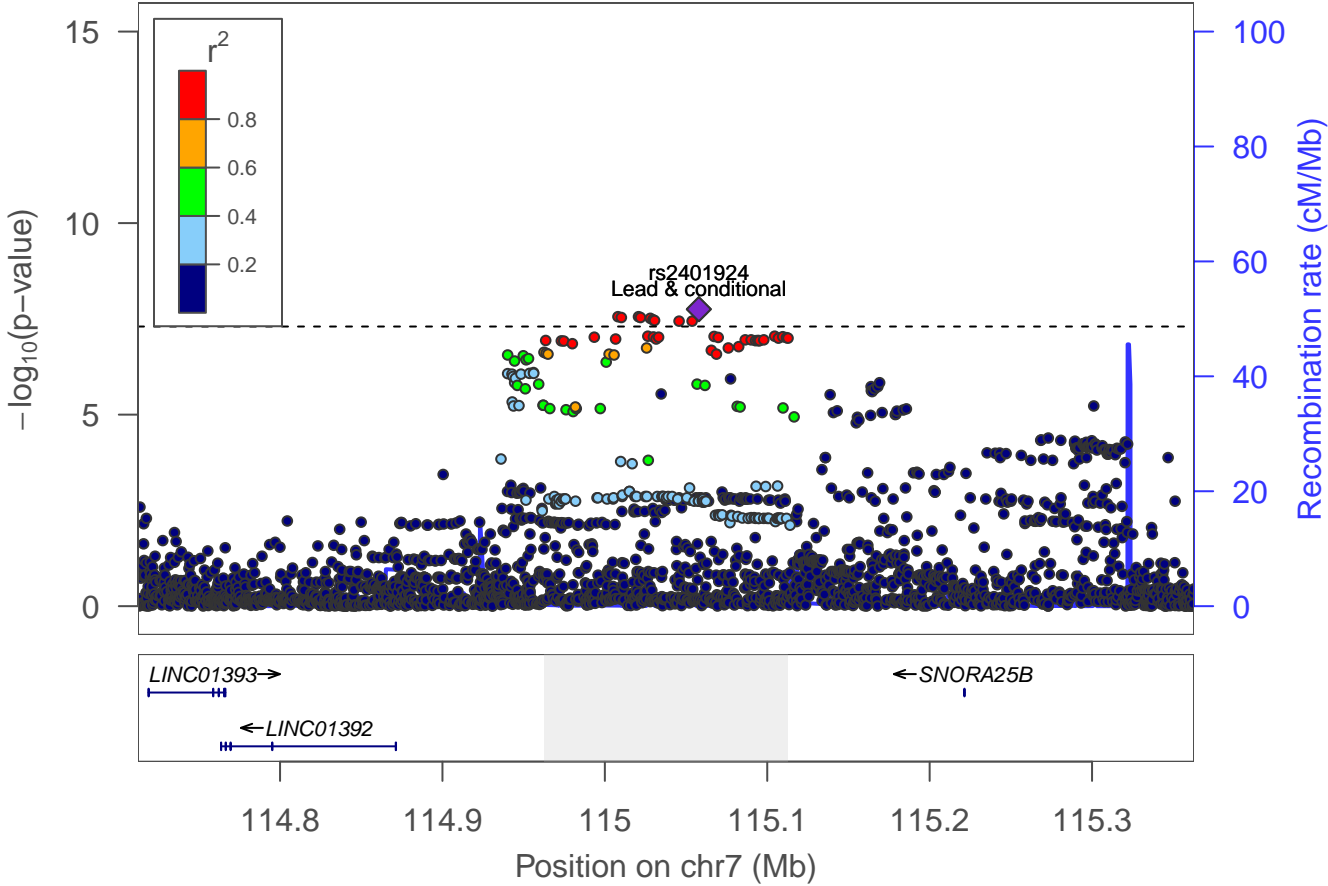

# First PC risky behaviors: locus 52 [chr 7:127.677–127.788Mb]

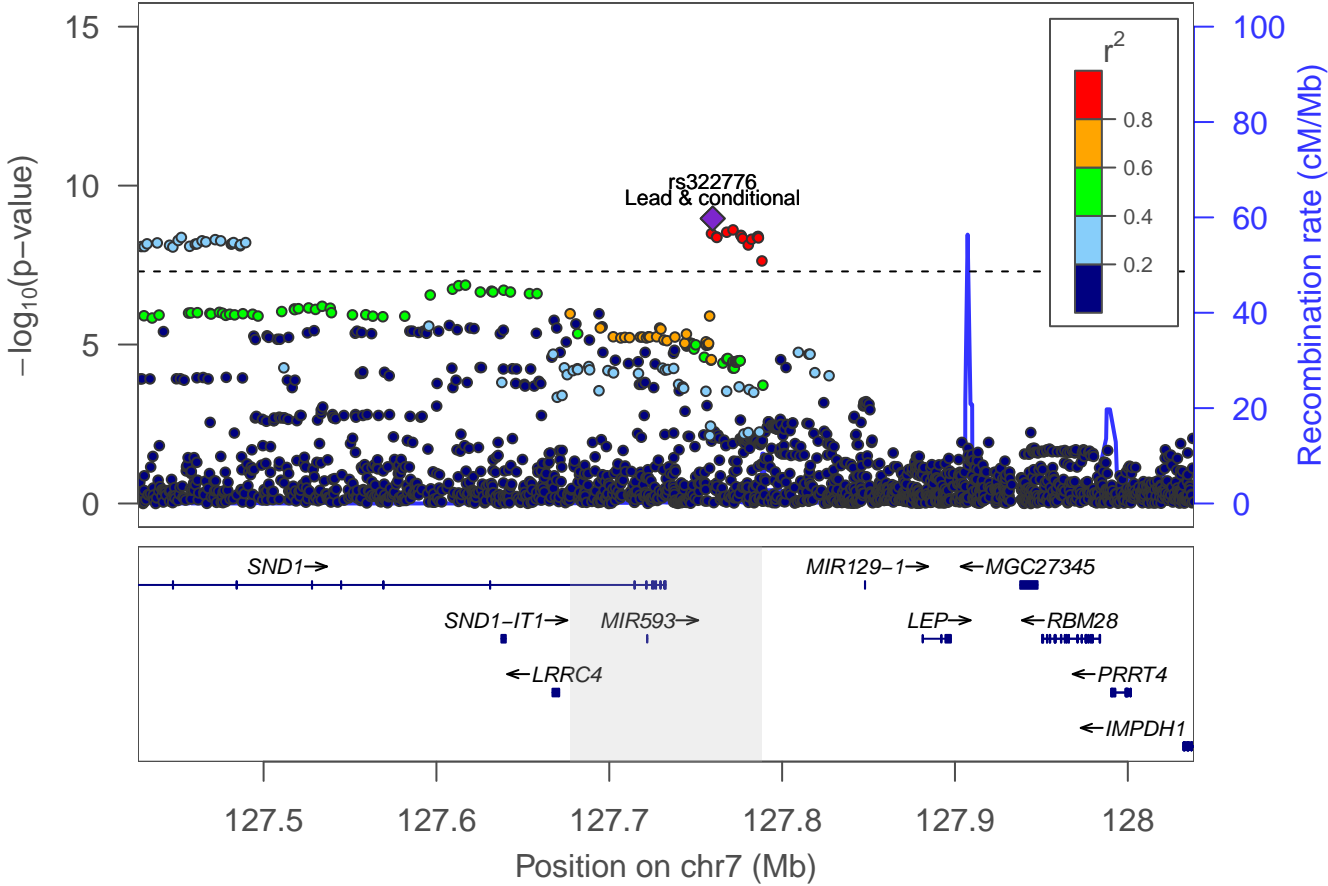

# First PC risky behaviors: Locus 53 [chr 7: 153.451–153.497Mb]

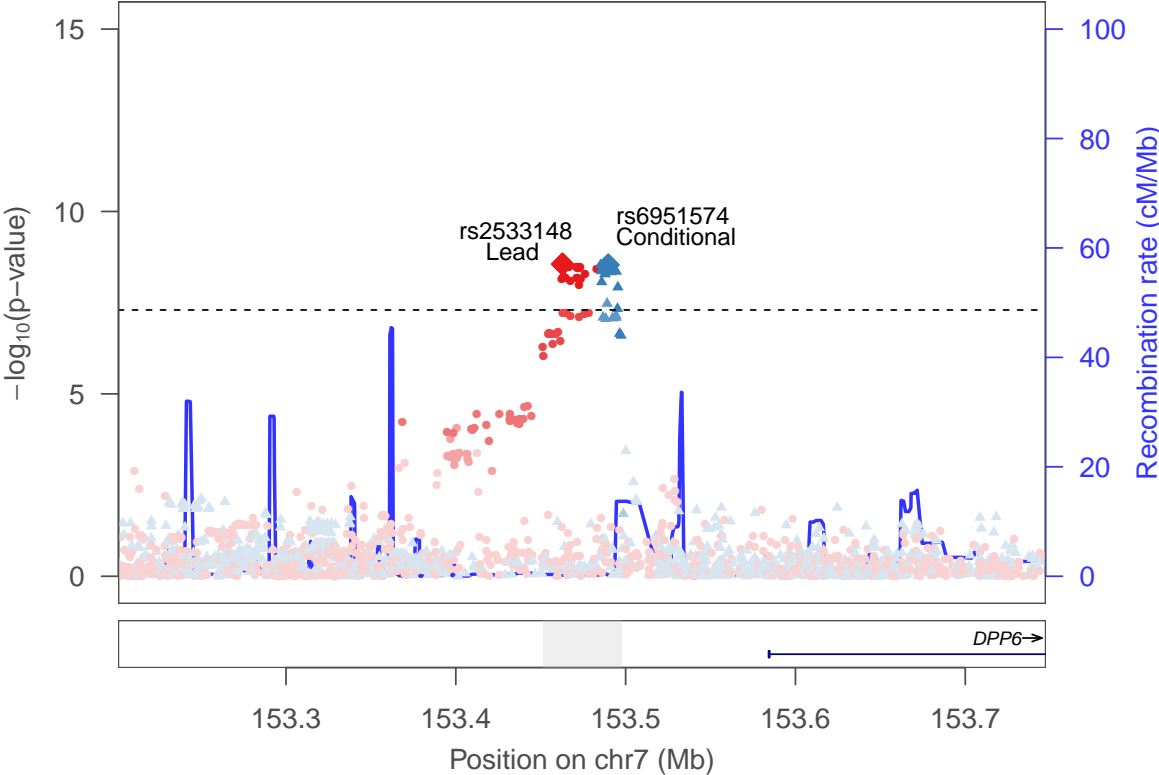

rs6951574 ▲  
rs2533148 ●

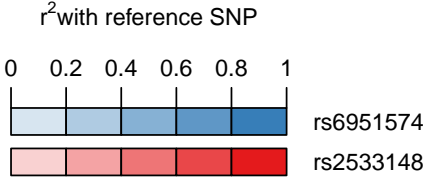

# First PC risky behaviors: locus 54 [chr 7:158.111–158.122Mb]

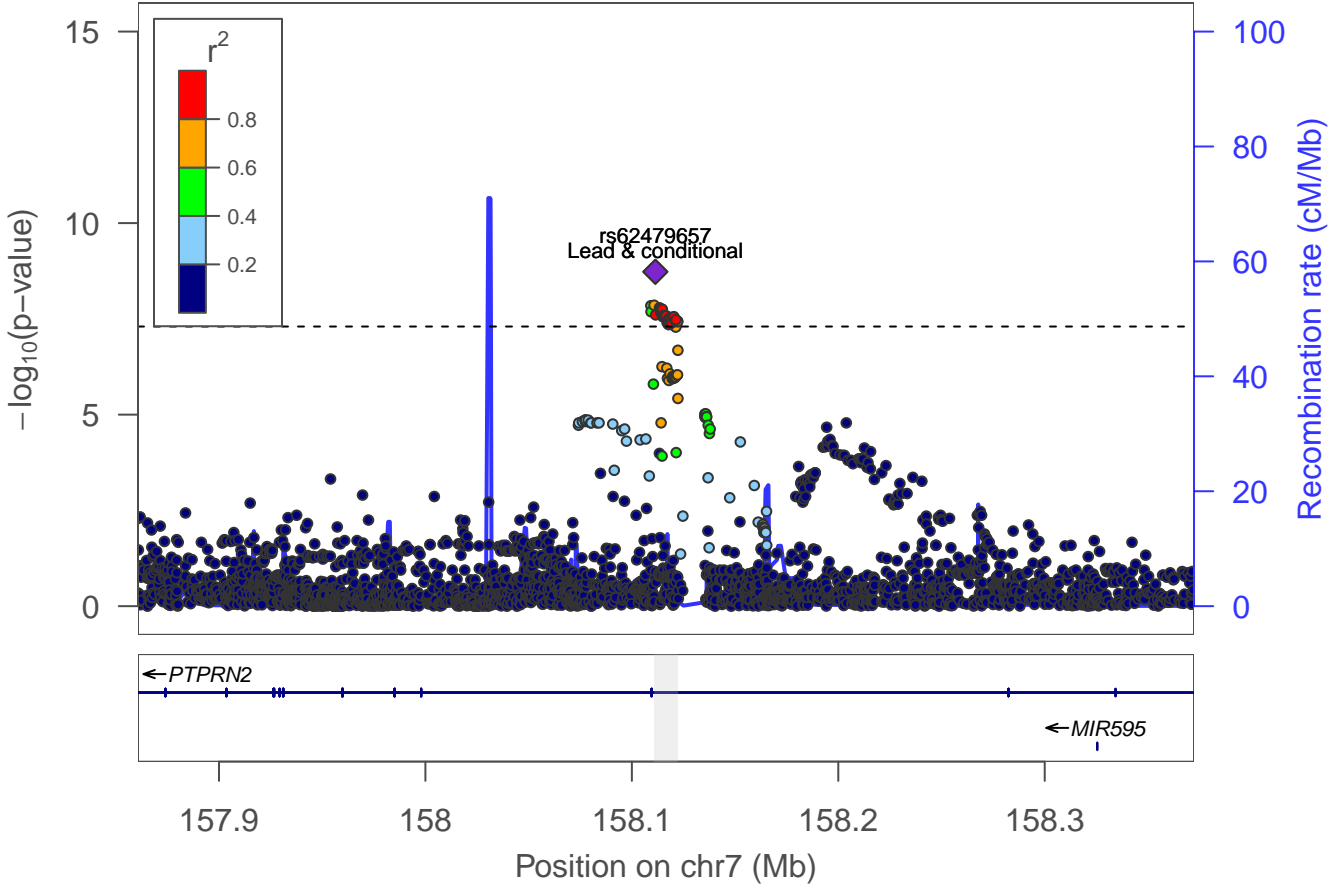

# First PC risky behaviors: locus 55 [chr 8:59.799–59.817Mb]

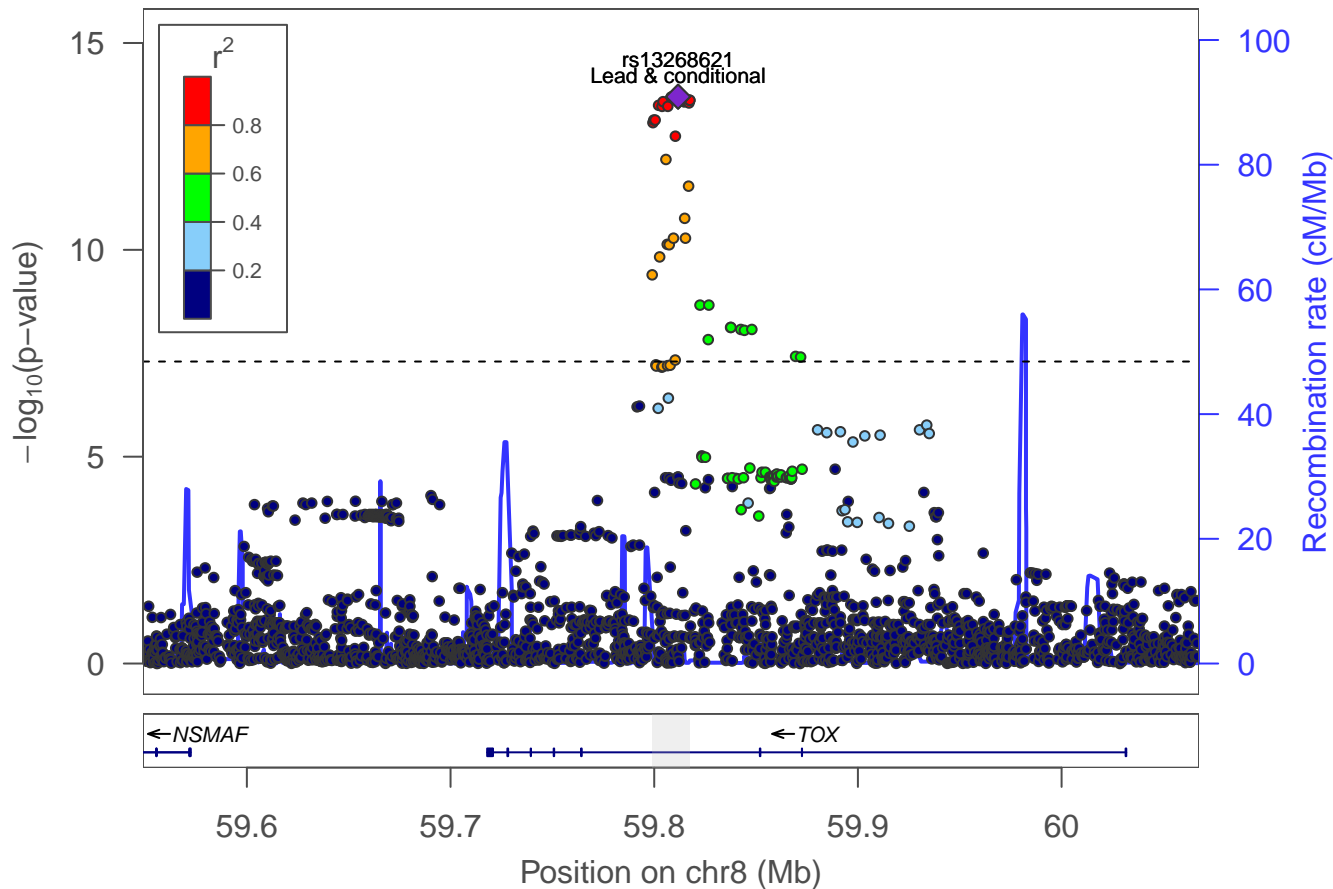

# First PC risky behaviors: locus 56 [chr 8:92.749–92.815Mb]

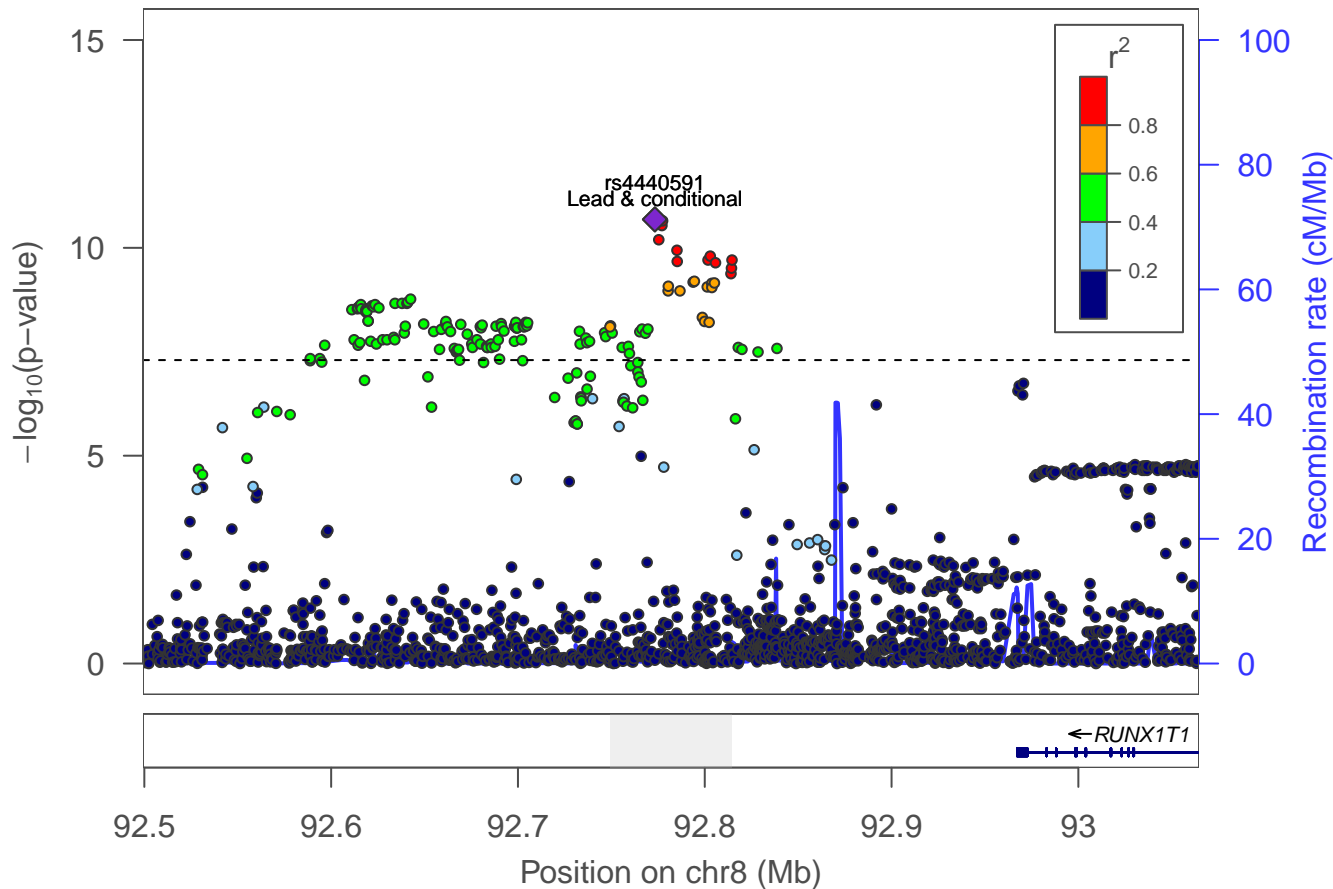



# First PC risky behaviors: locus 57 [chr 8:93.184–93.262Mb]

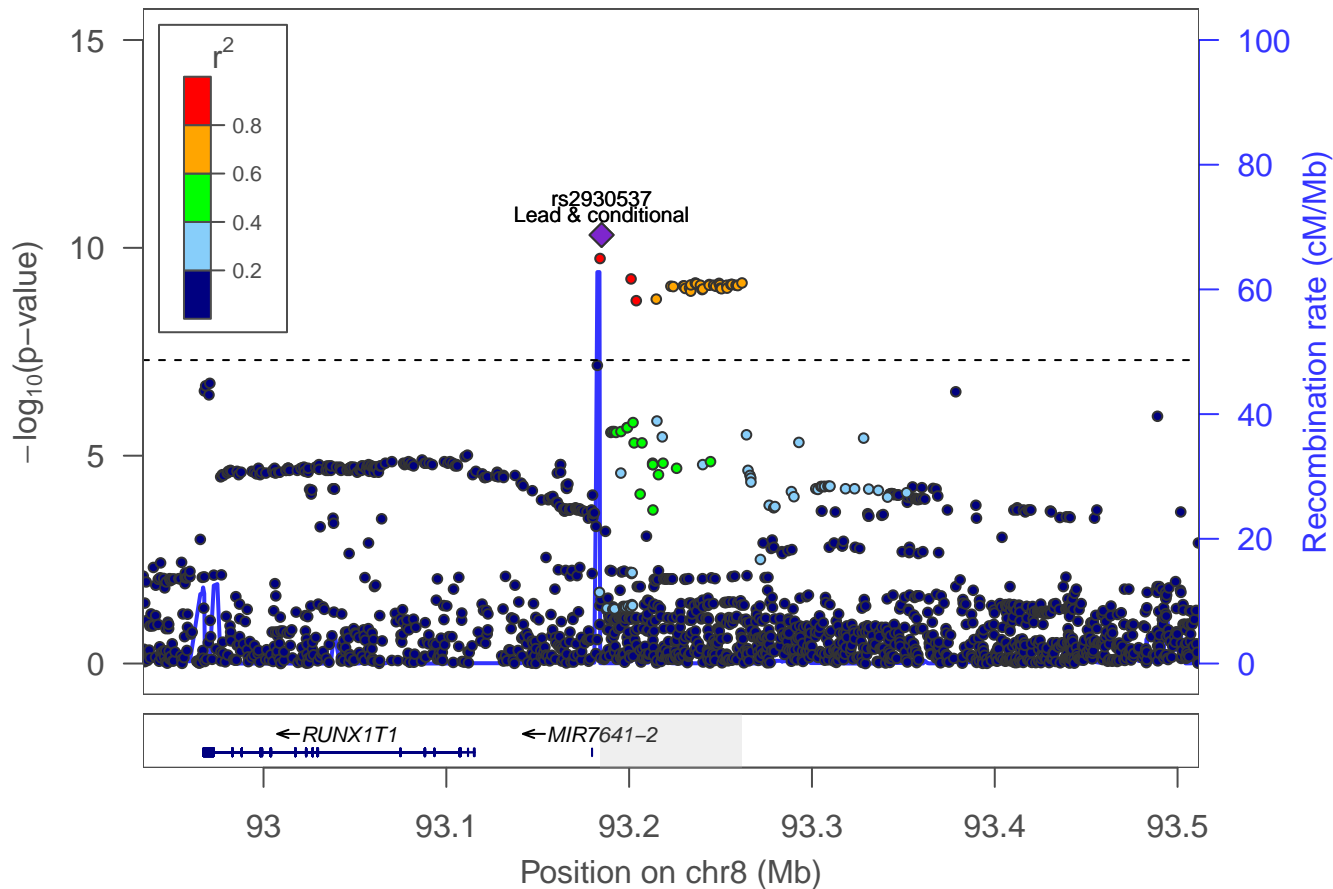

# First PC risky behaviors: locus 58 [chr 9:10.963–11.076Mb]

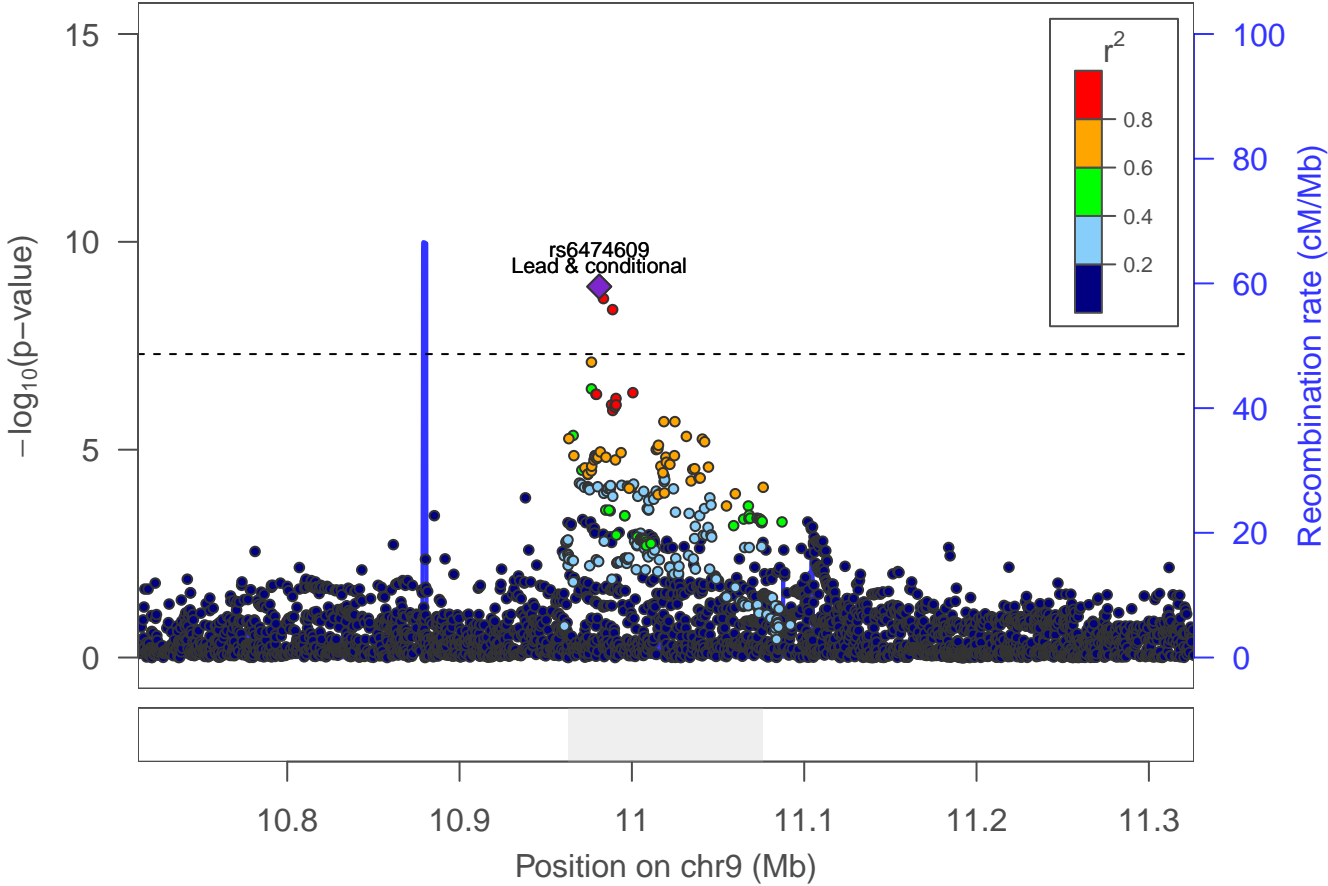

# First PC risky behaviors: locus 59 [chr 9:86.728–86.756Mb]

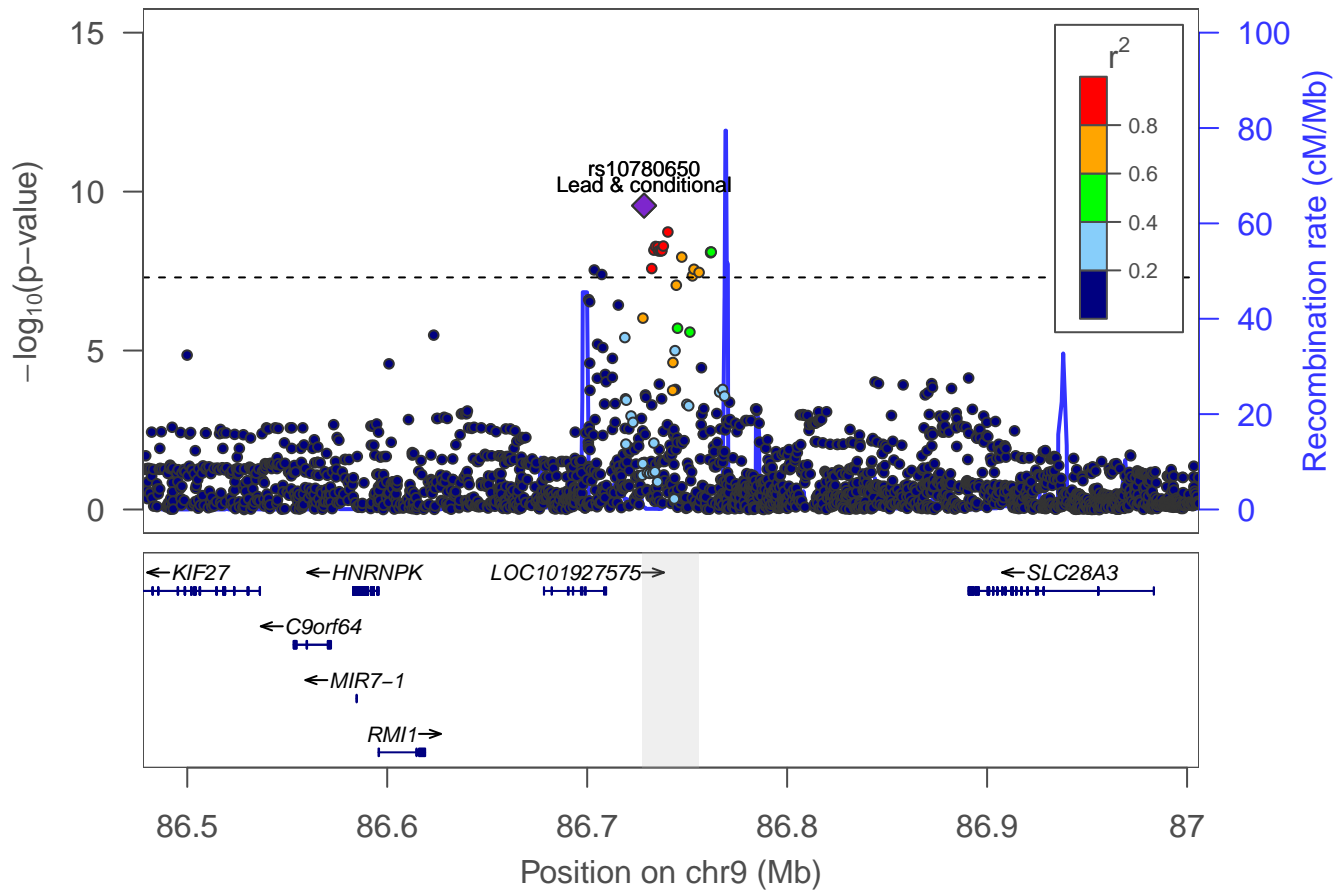

# First PC risky behaviors: locus 60 [chr 9:109.326–109.364Mb]

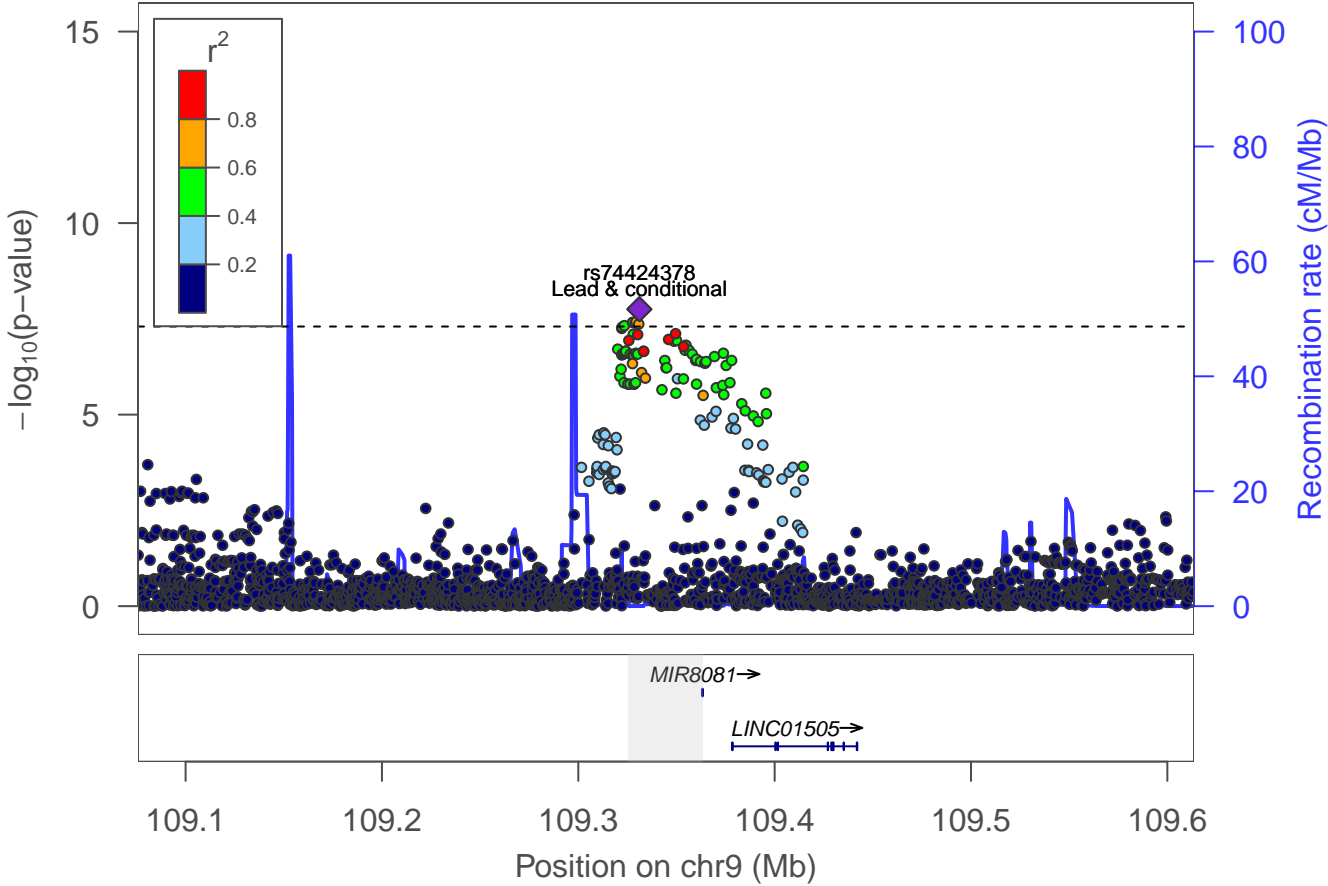

# First PC risky behaviors: Locus 61 [chr 10: 104.226–104.960Mb]

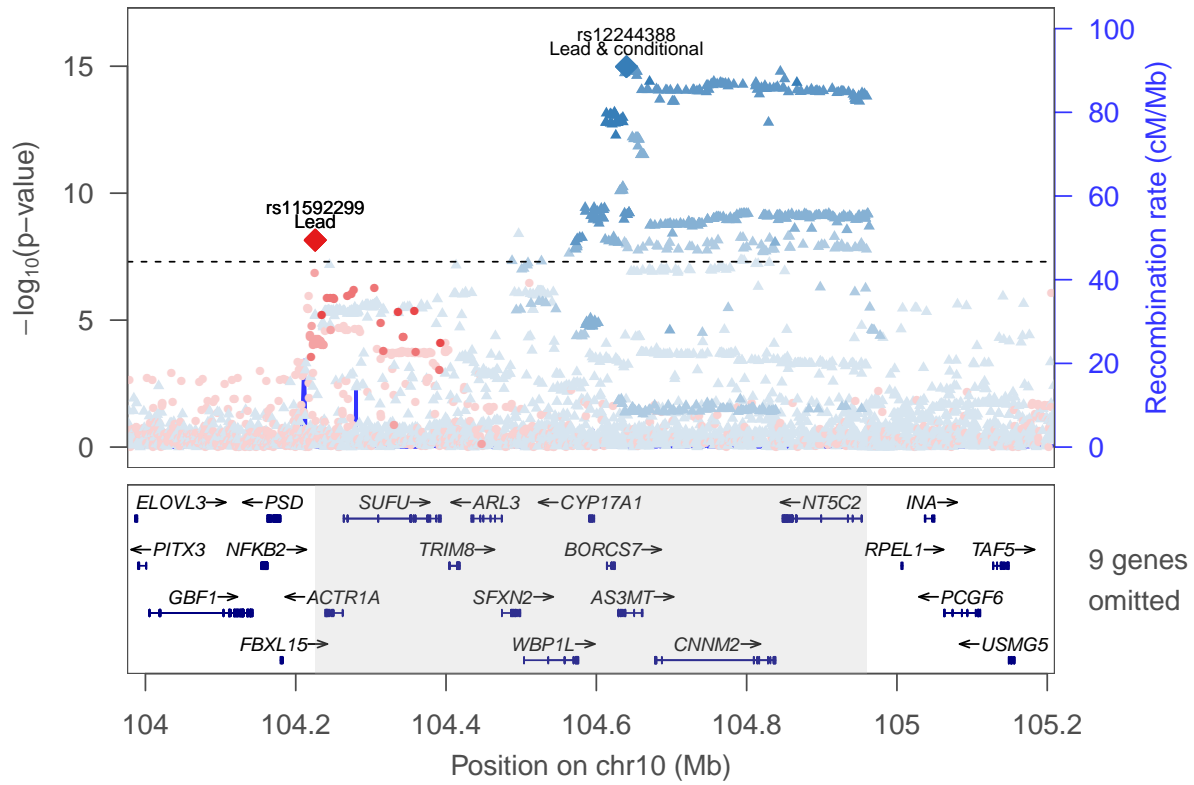

rs12244388 ▲  
 rs11592299 ●

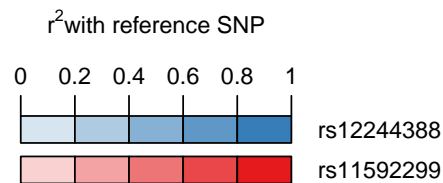

# First PC risky behaviors: Locus 62 [chr 11: 27.646–27.731Mb]

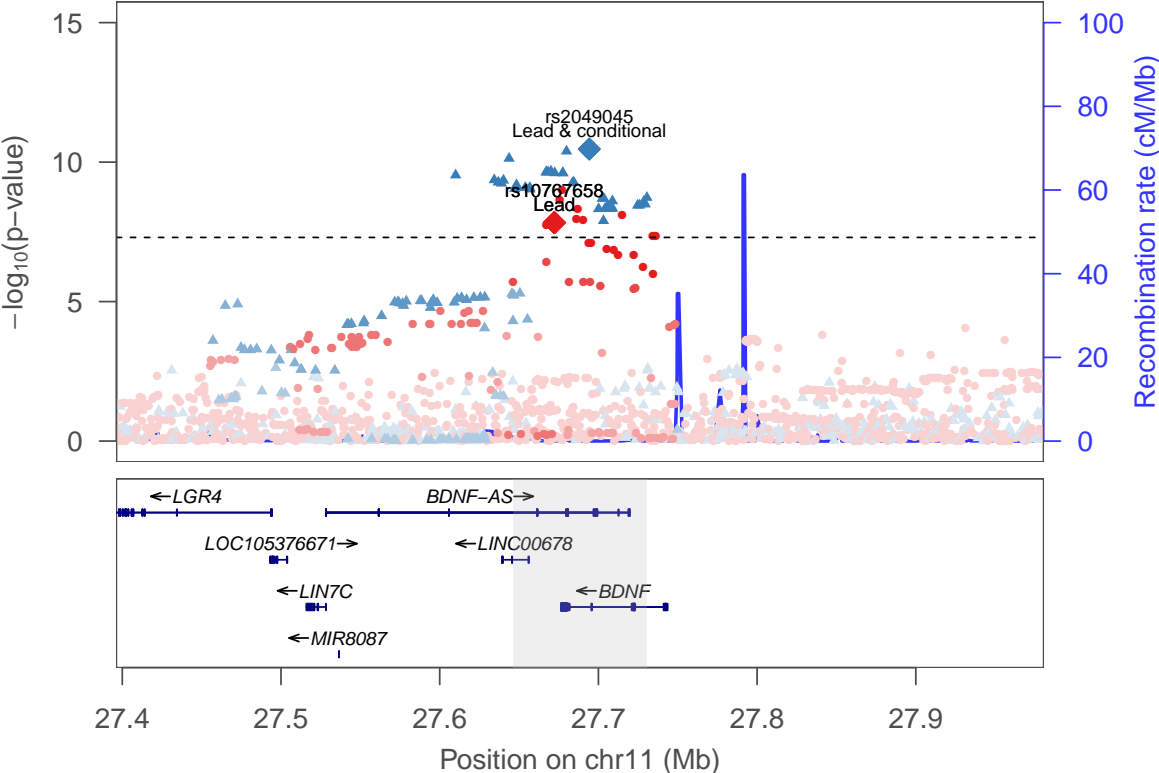

rs2049045 ▲  
 rs10767658 ●

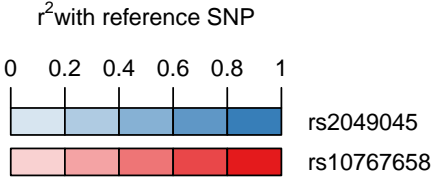

# First PC risky behaviors: Locus 63 [chr 11: 28.588–28.698Mb]

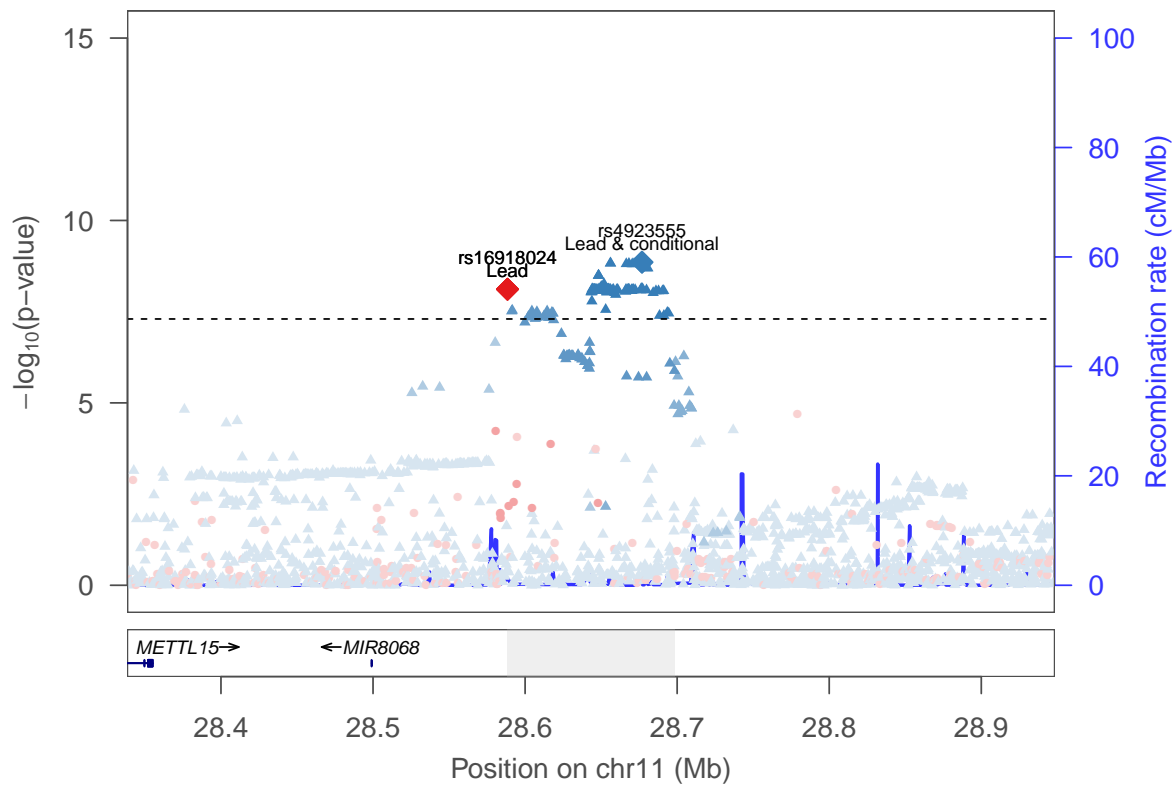

rs4923555 ▲  
rs16918024 ●

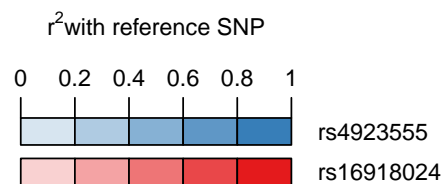

# First PC risky behaviors: locus 64 [chr 11:41.415–41.445Mb]

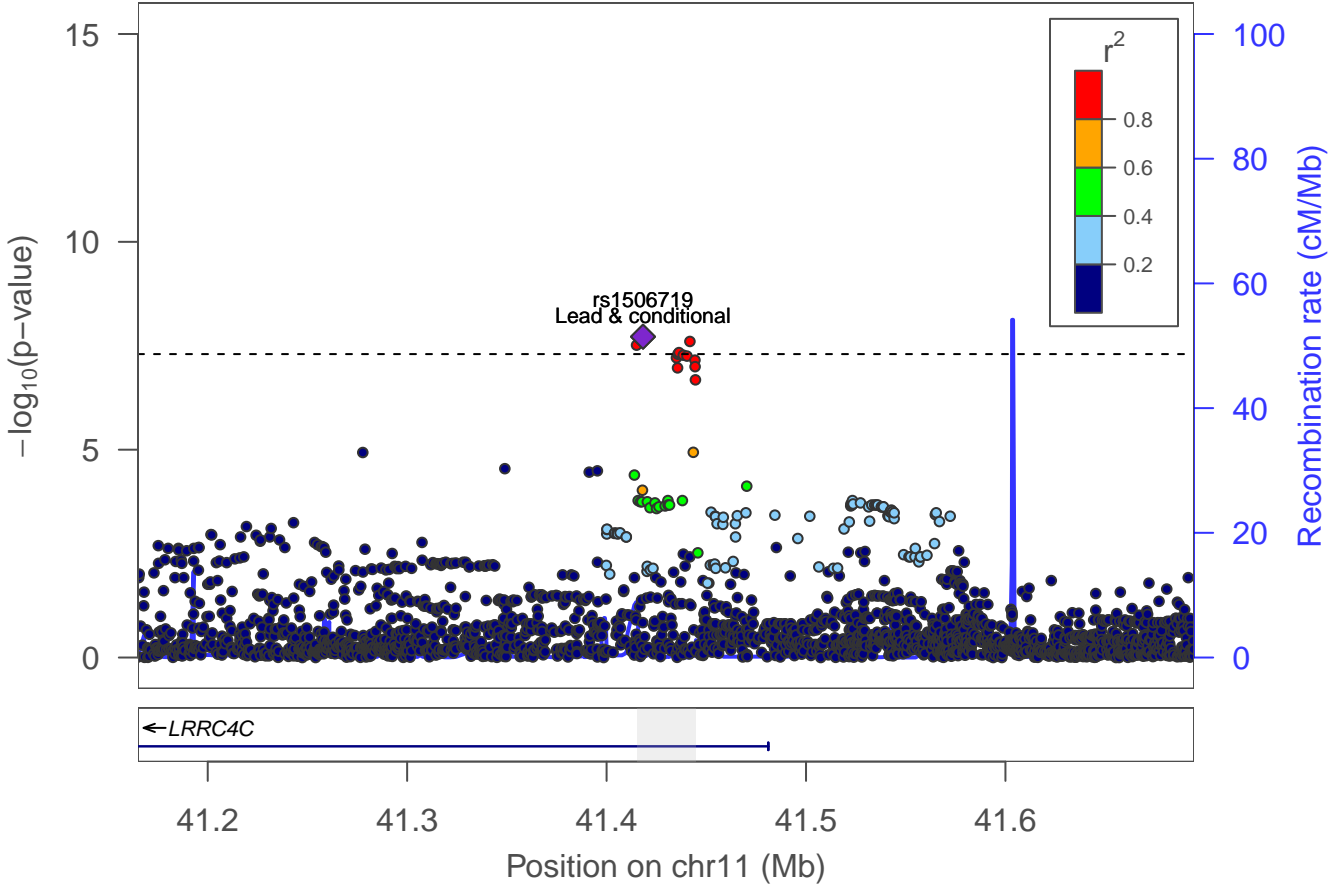



# First PC risky behaviors: locus 65 [chr 11:47.372–47.947Mb]

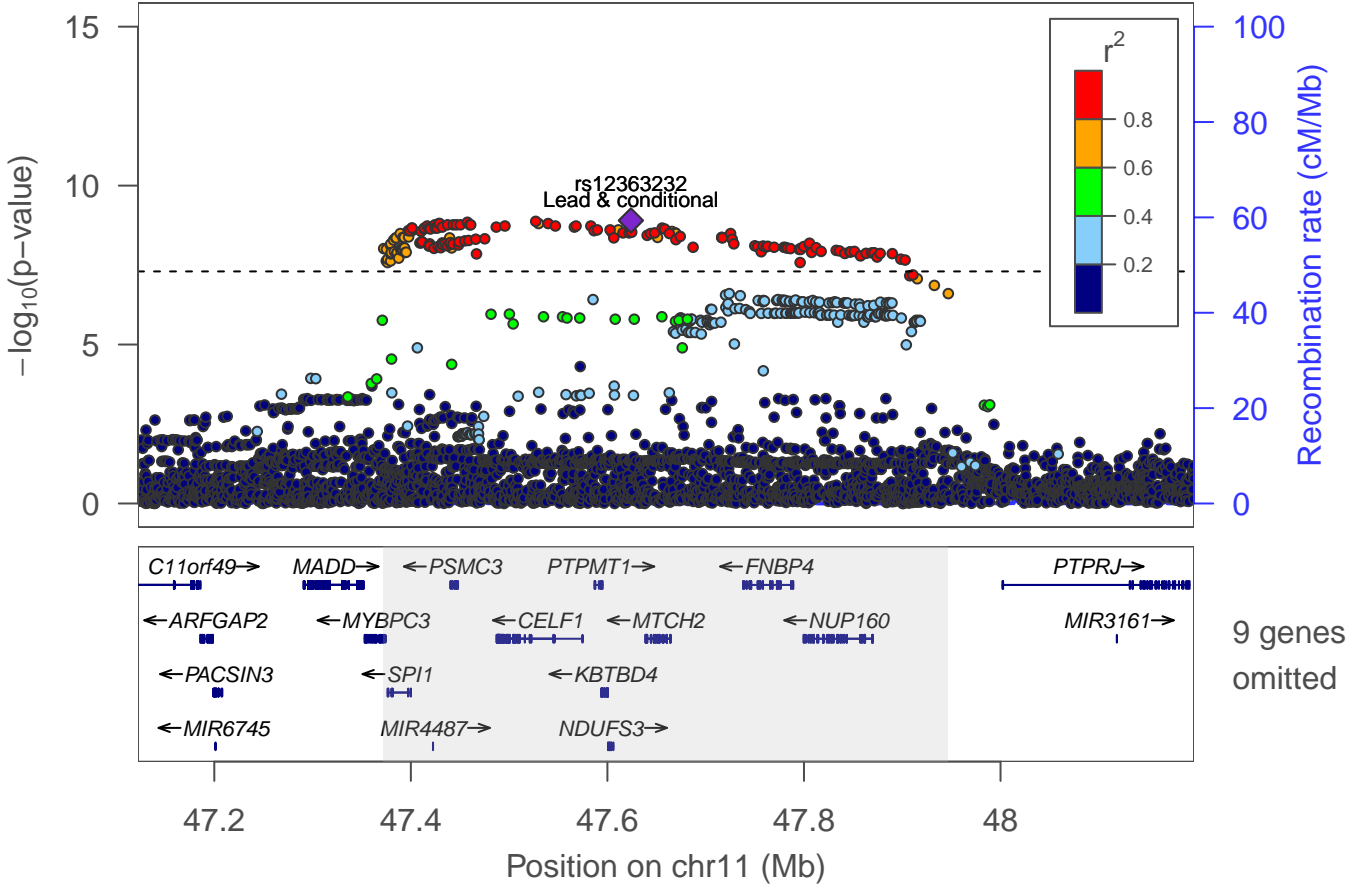

# First PC risky behaviors: locus 66 [chr 11:112.827–112.913Mb]

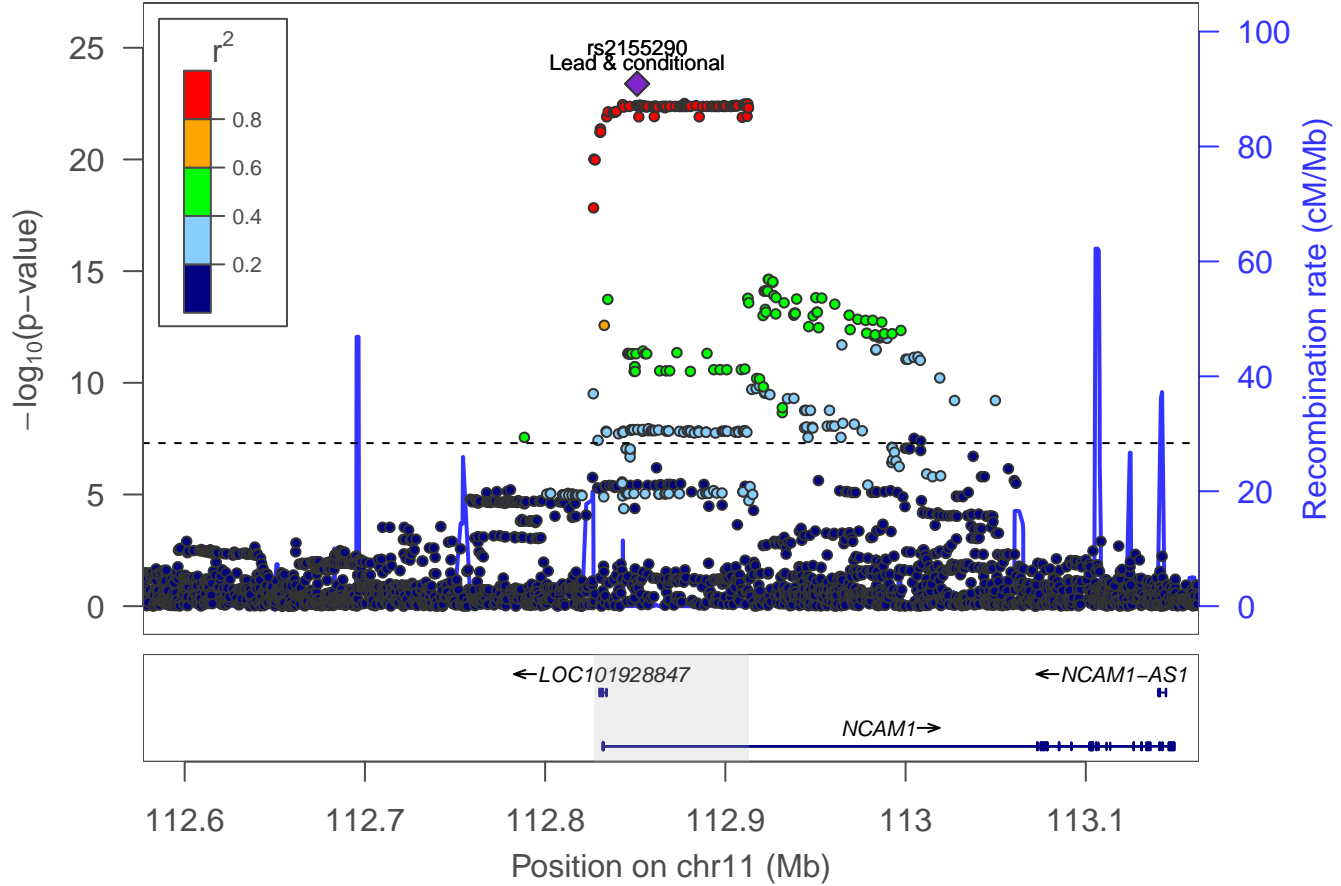

# First PC risky behaviors: locus 67 [chr 12:108.594–108.630Mb]

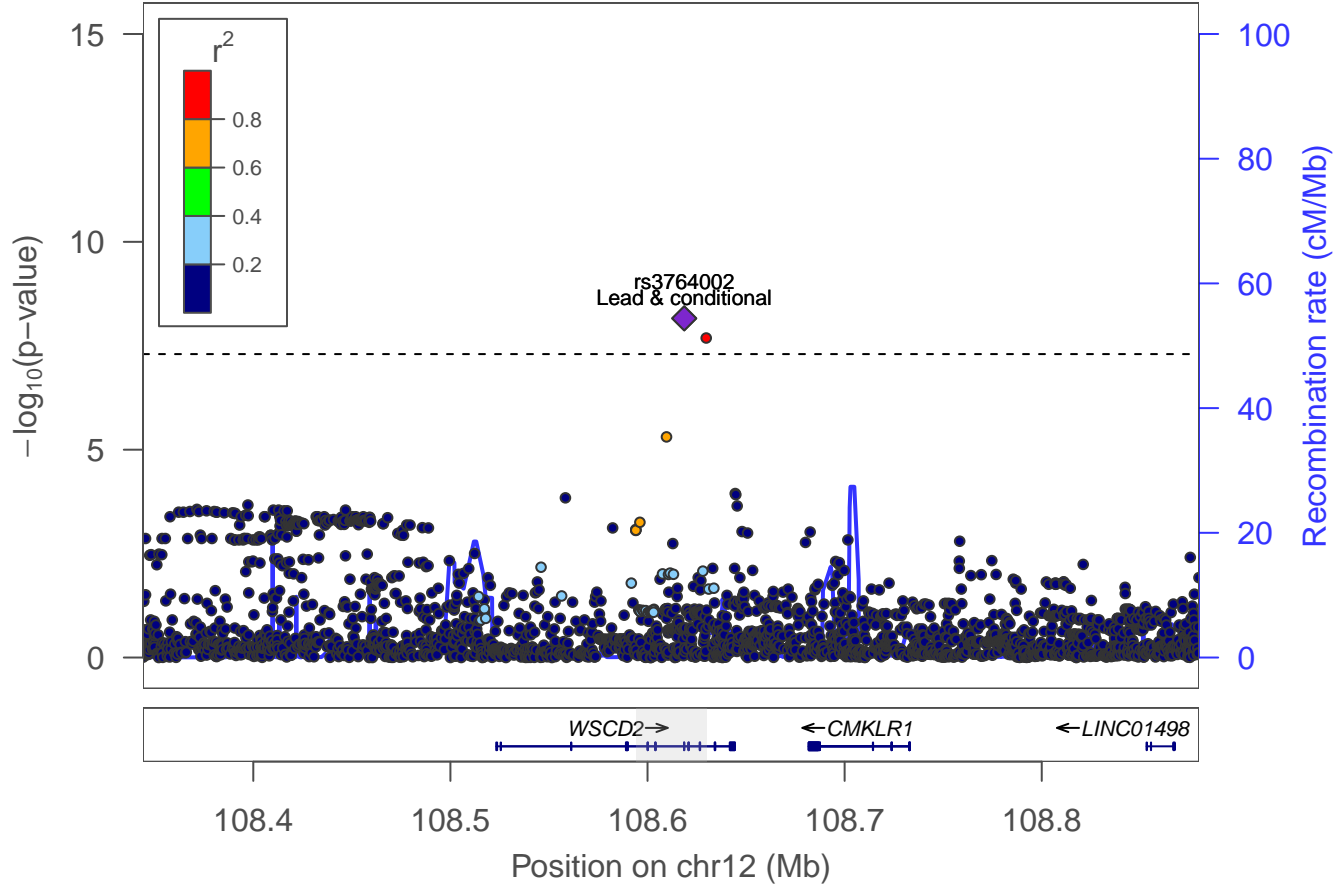

# First PC risky behaviors: locus 68 [chr 13:100.708–100.783Mb]

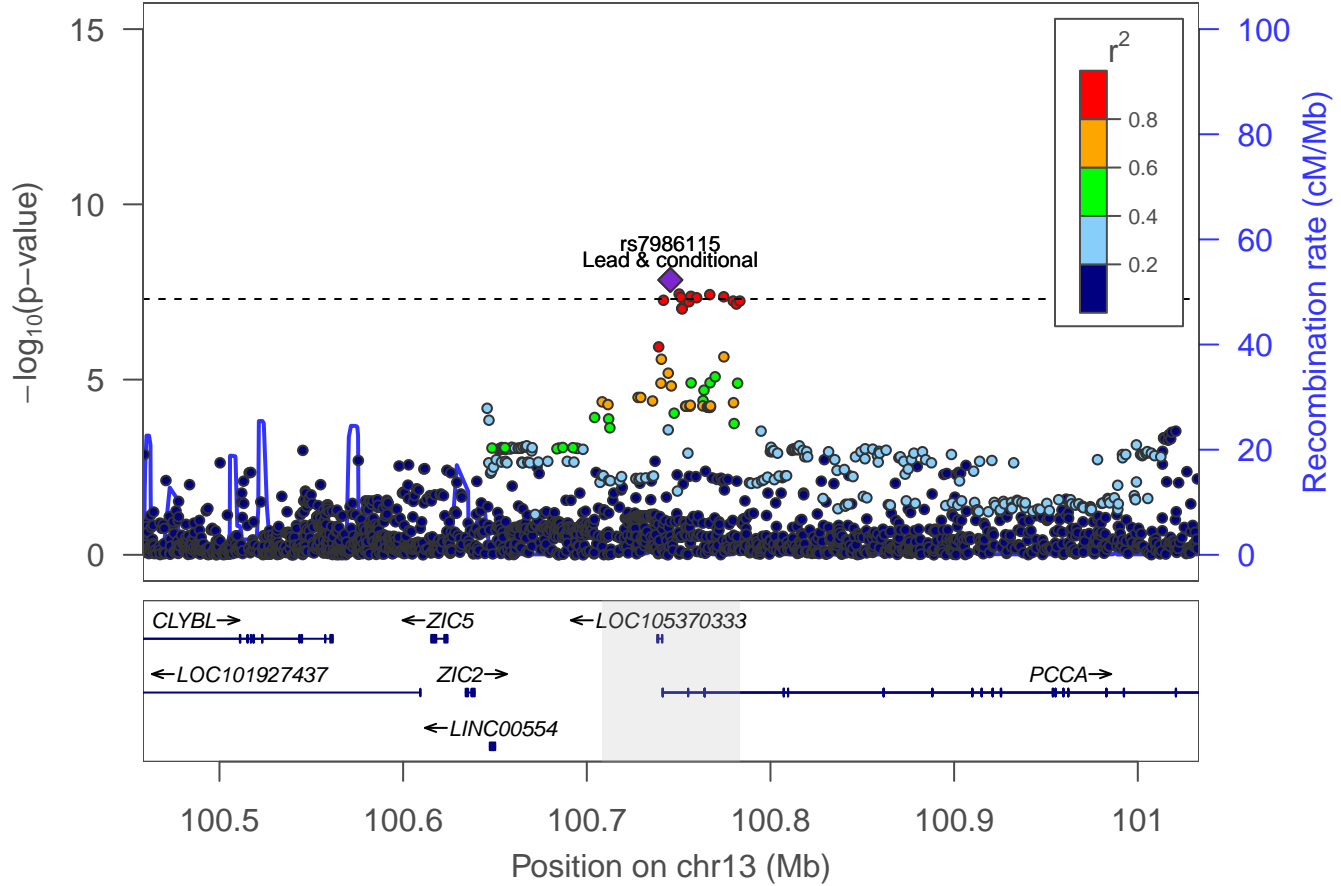

# First PC risky behaviors: locus 69 [chr 14:98.647–98.670Mb]

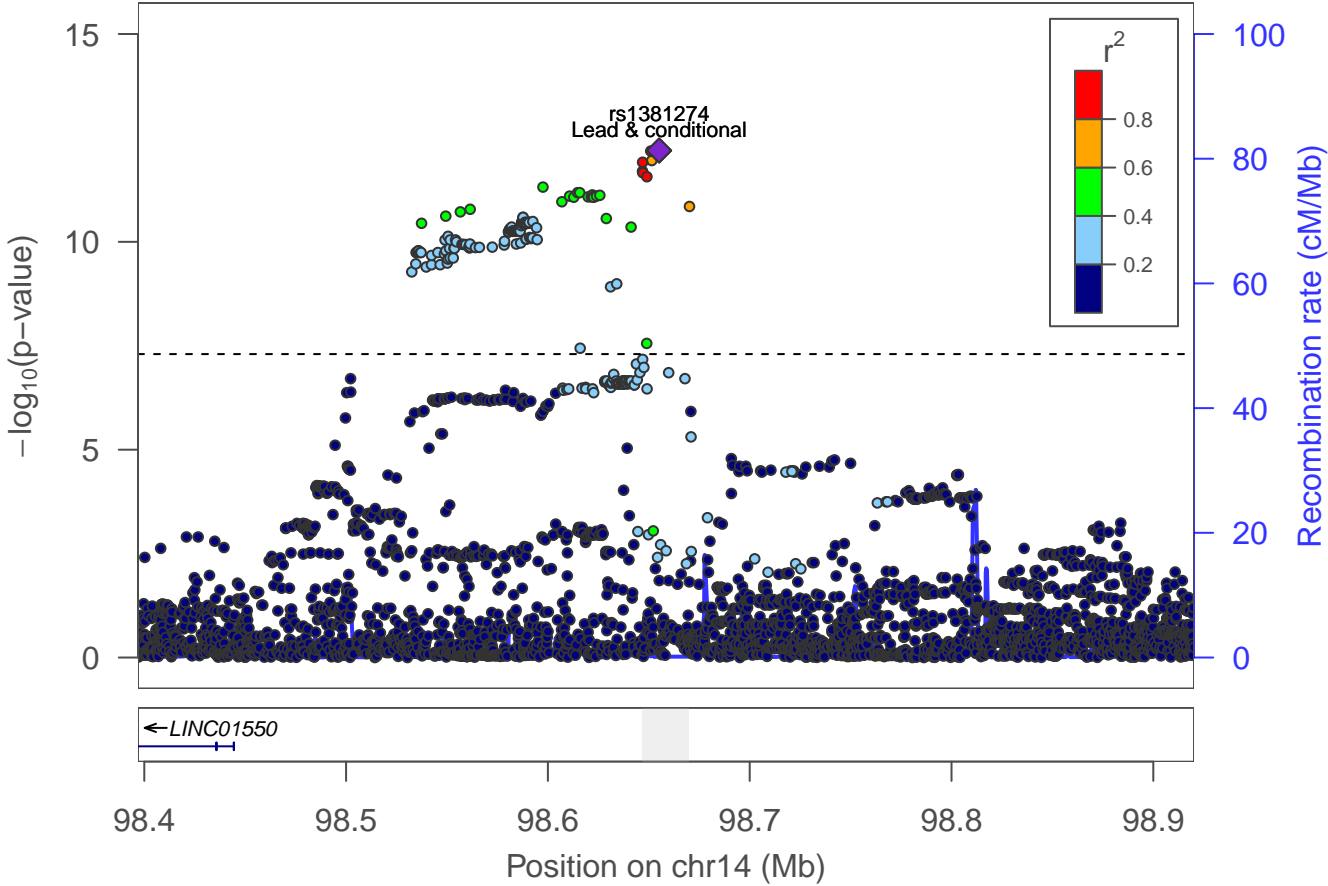

# First PC risky behaviors: locus 70 [chr 14:104.610–104.620Mb]

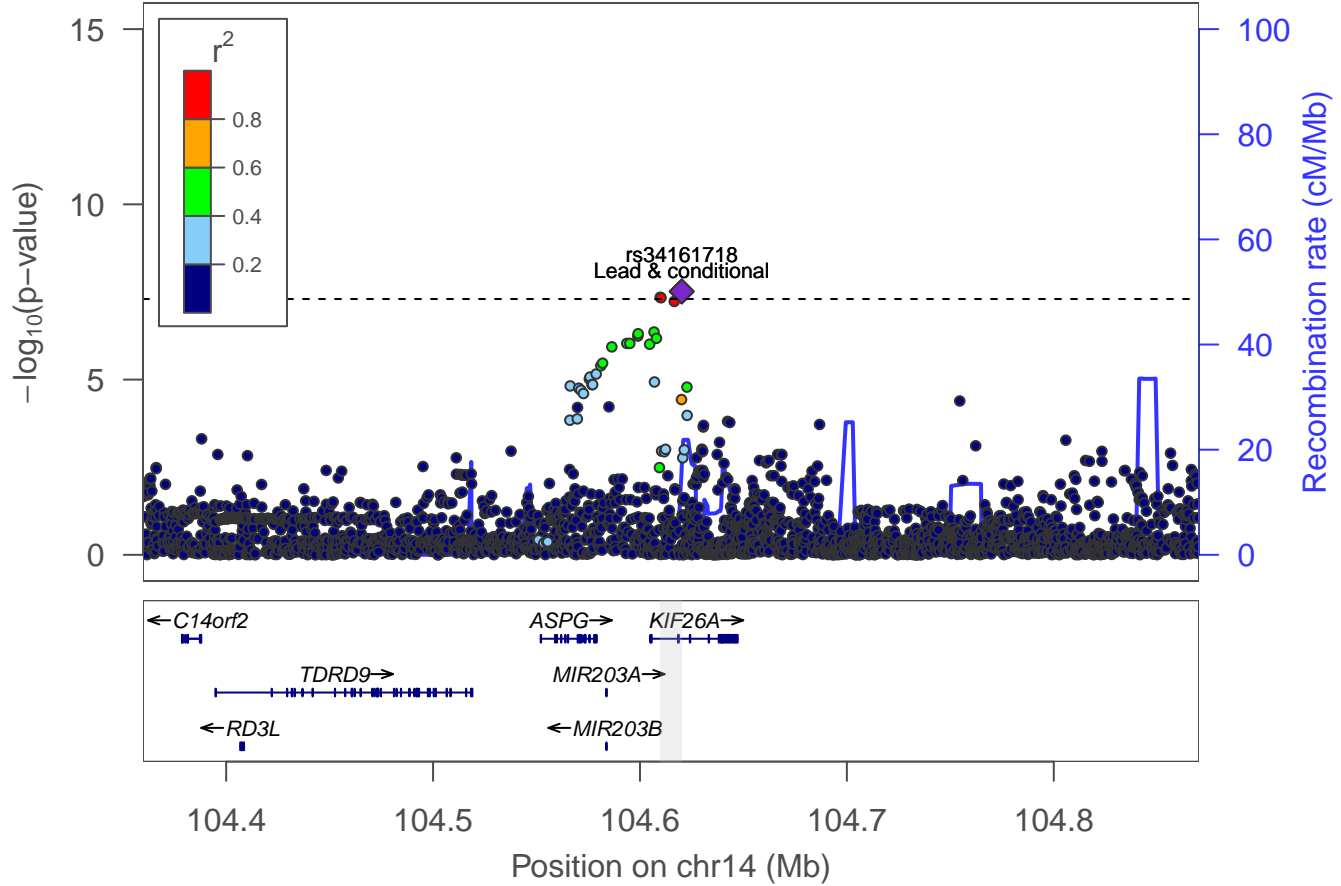

# First PC risky behaviors: locus 71 [chr 15:47.613–47.685Mb]

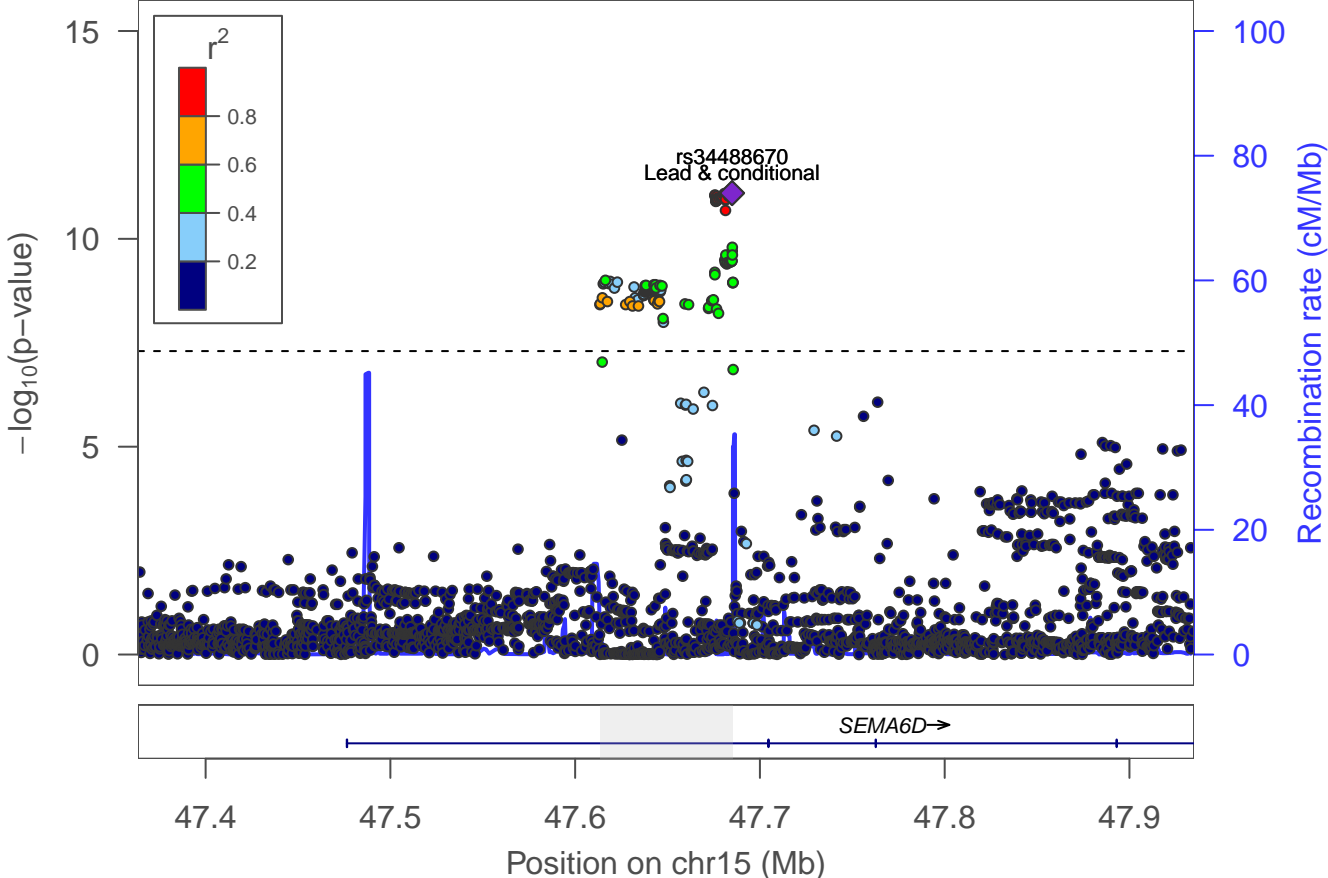

# First PC risky behaviors: locus 72 [chr 15:91.404–91.437Mb]

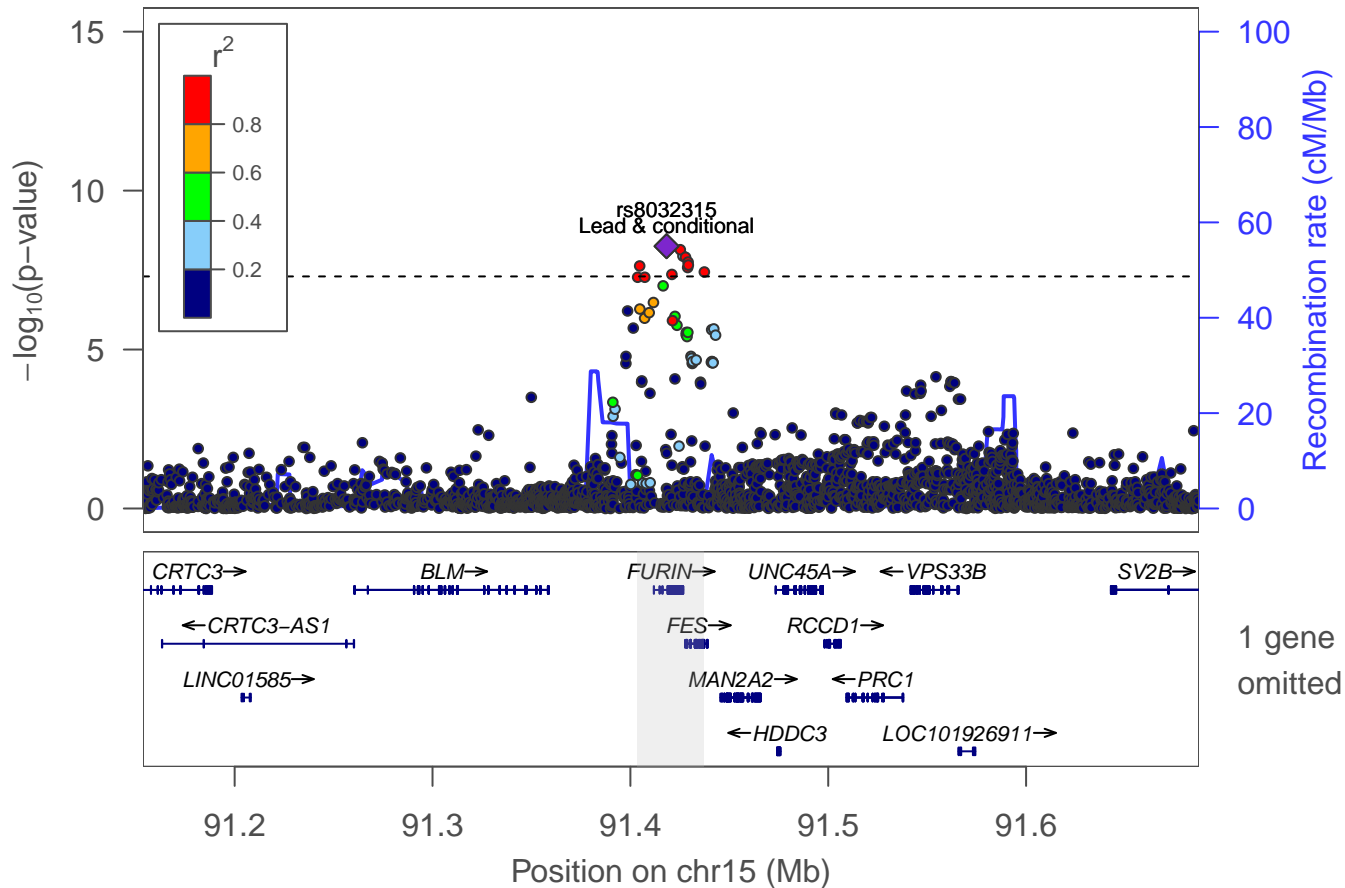



# First PC risky behaviors: locus 73 [chr 15:99.179–99.207Mb]

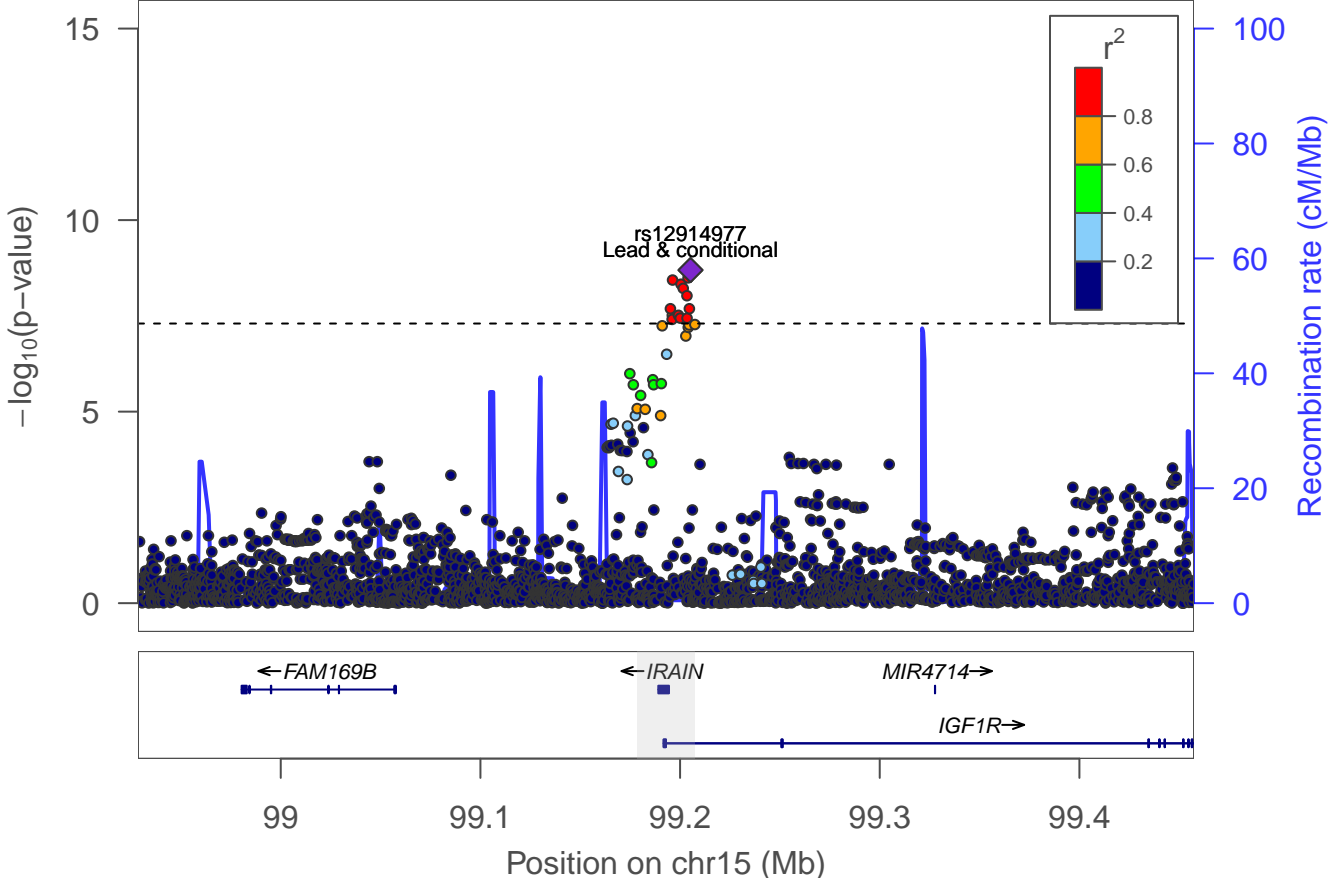

# First PC risky behaviors: locus 74 [chr 16:13.657–13.805Mb]

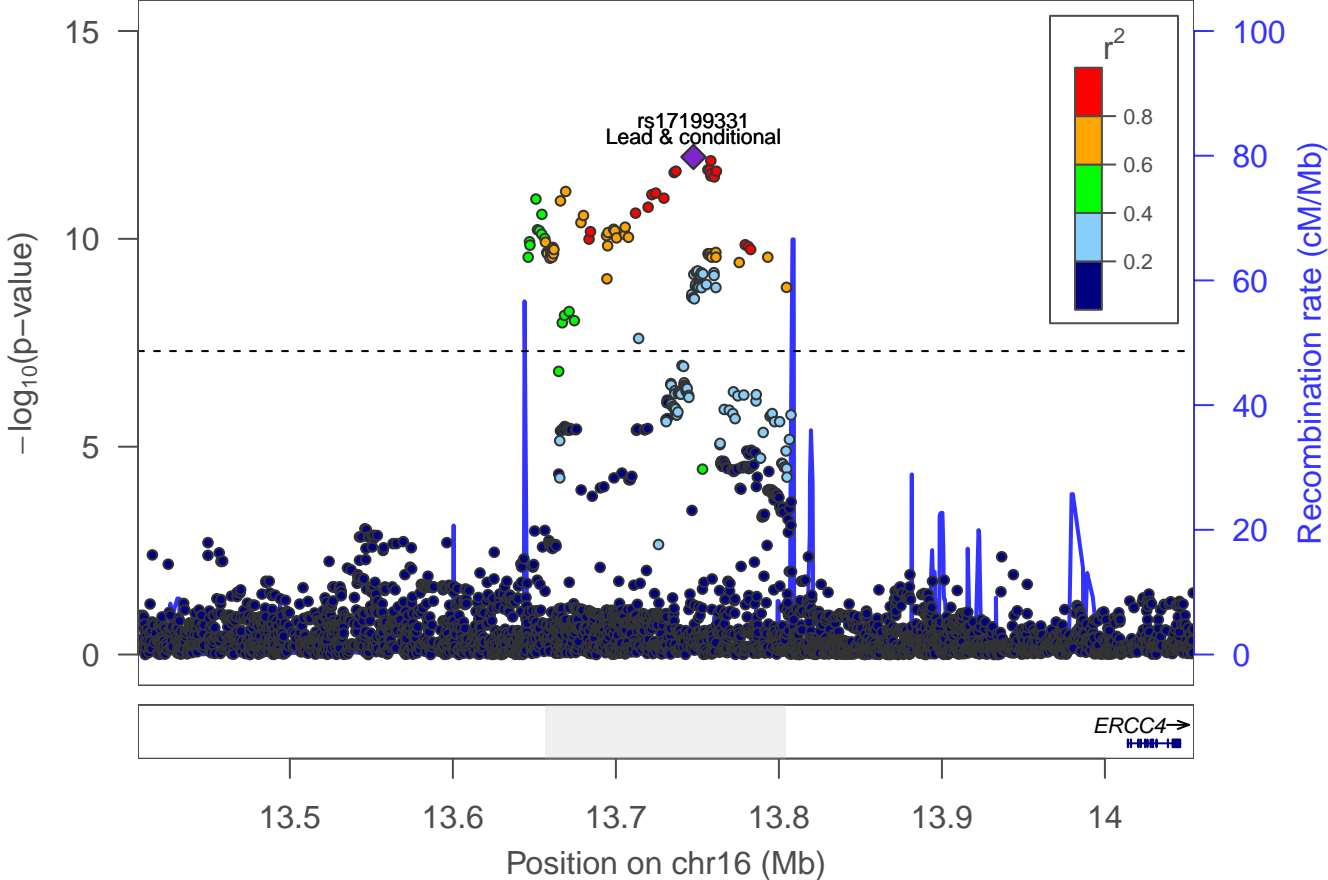



# First PC risky behaviors: locus 76 [chr 16:28.619–28.621Mb]

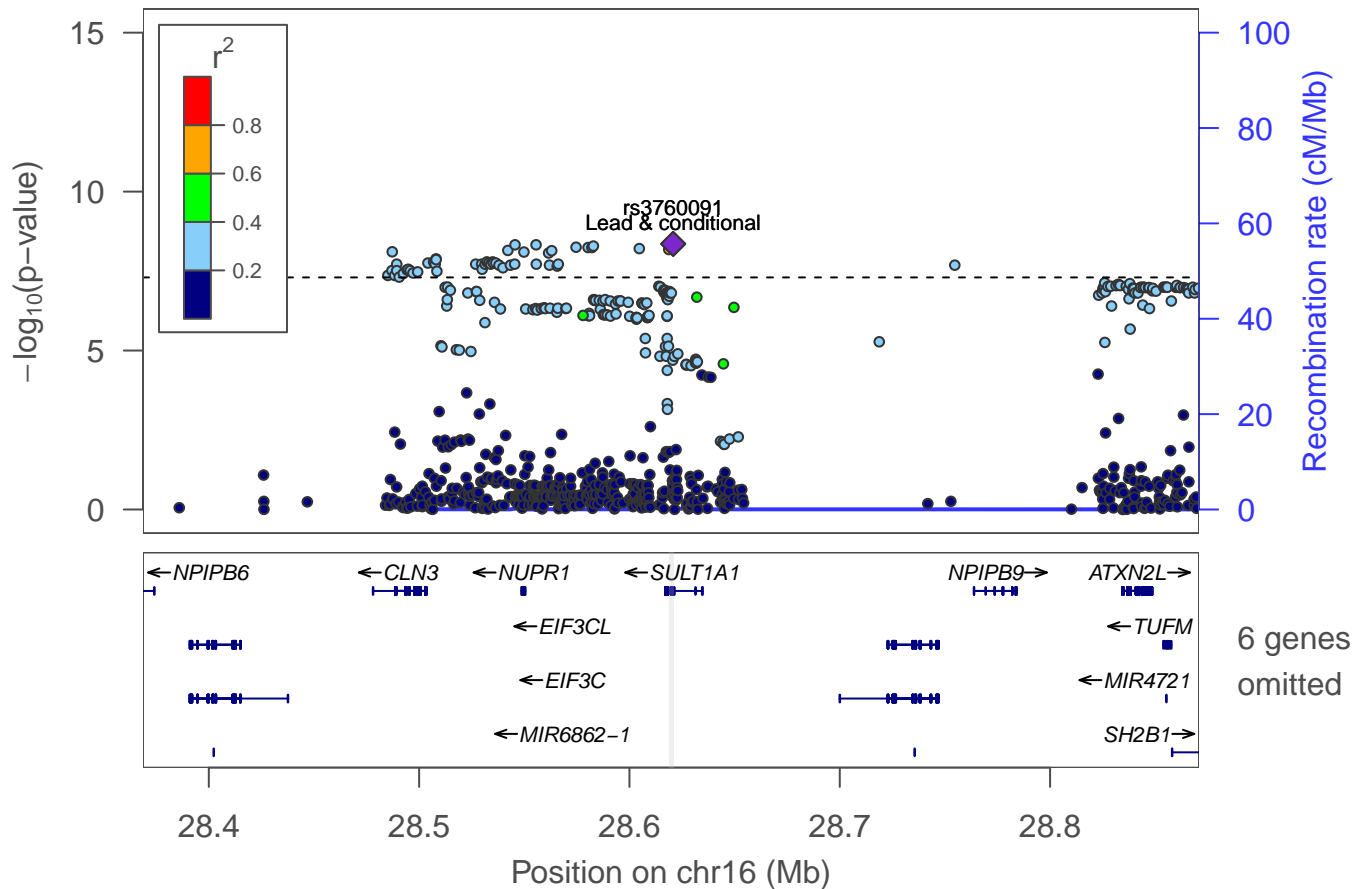

# First PC risky behaviors: locus 77 [chr 16:49.592–49.627Mb]

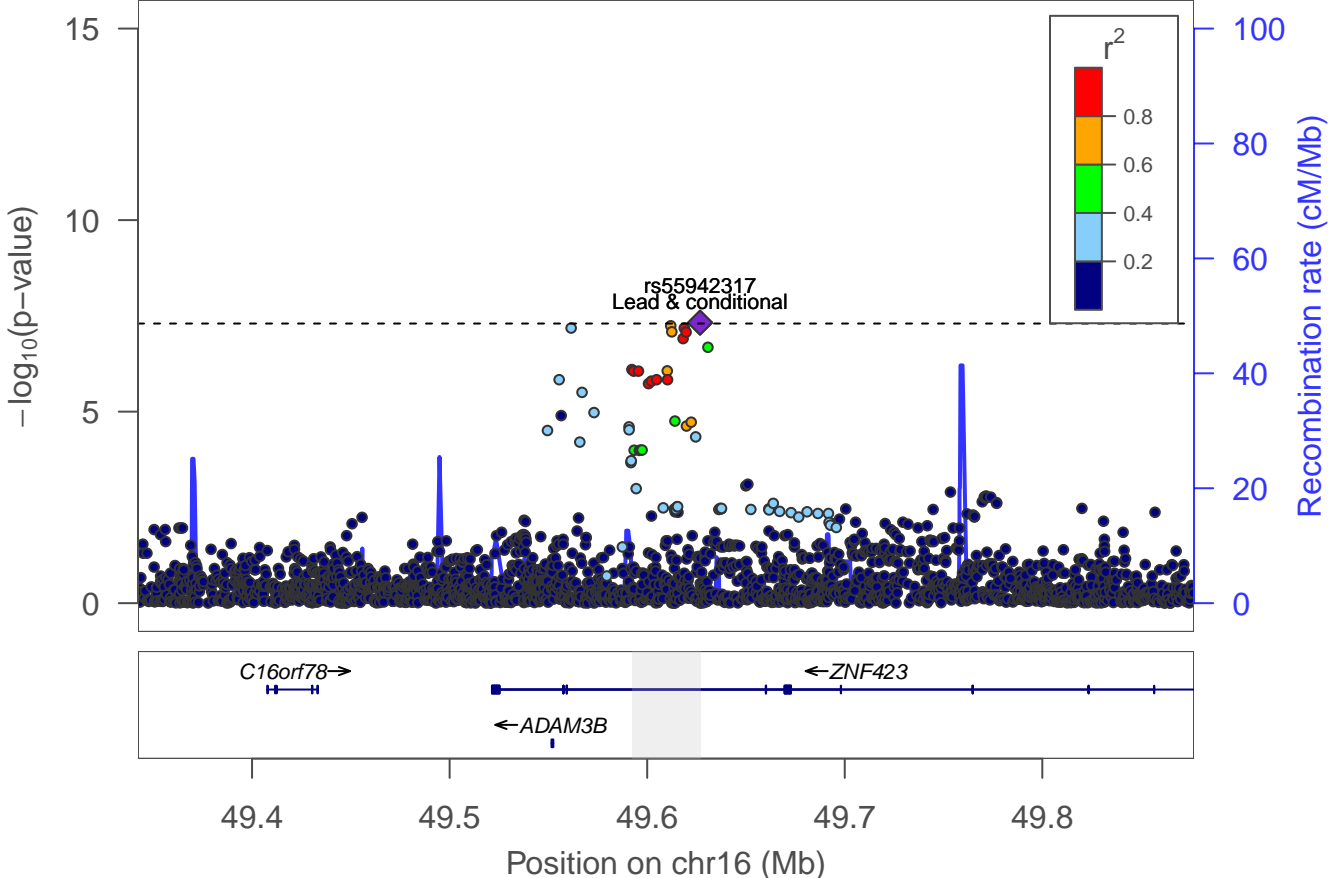



# First PC risky behaviors: locus 79 [chr 16:71.340–71.434Mb]

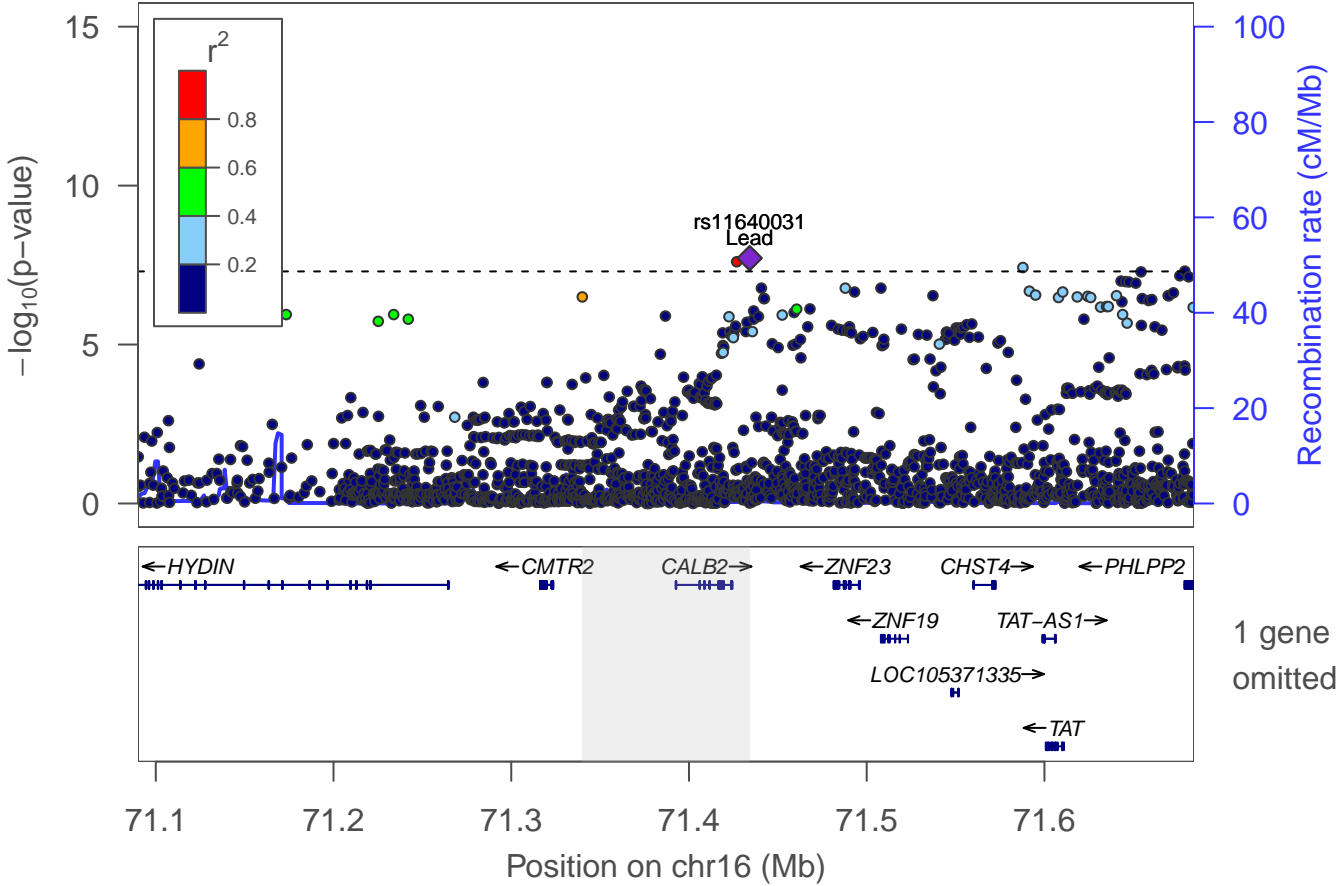

# First PC risky behaviors: Locus 80 [chr 16: 72.068–72.614Mb]

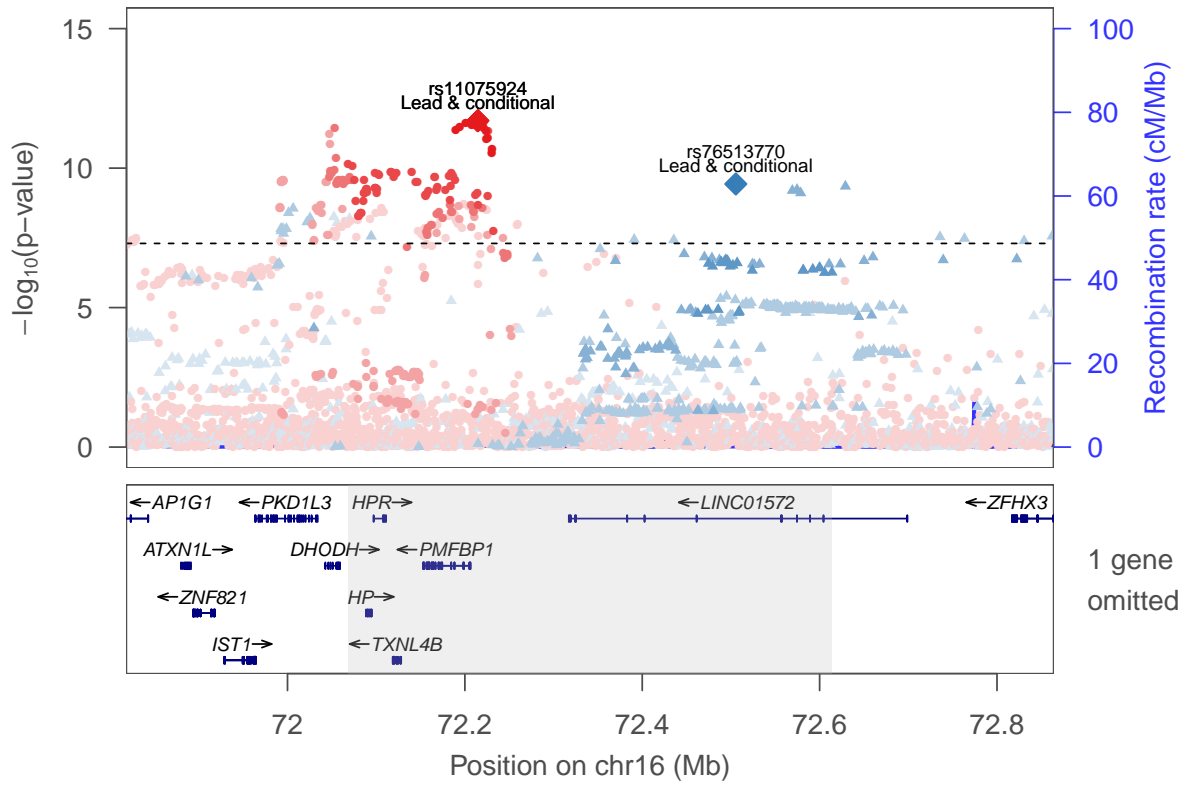

rs76513770 ▲  
 rs11075924 ●

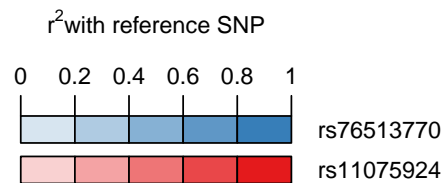



# First PC risky behaviors: locus 81 [chr 16:72.928–72.934Mb]

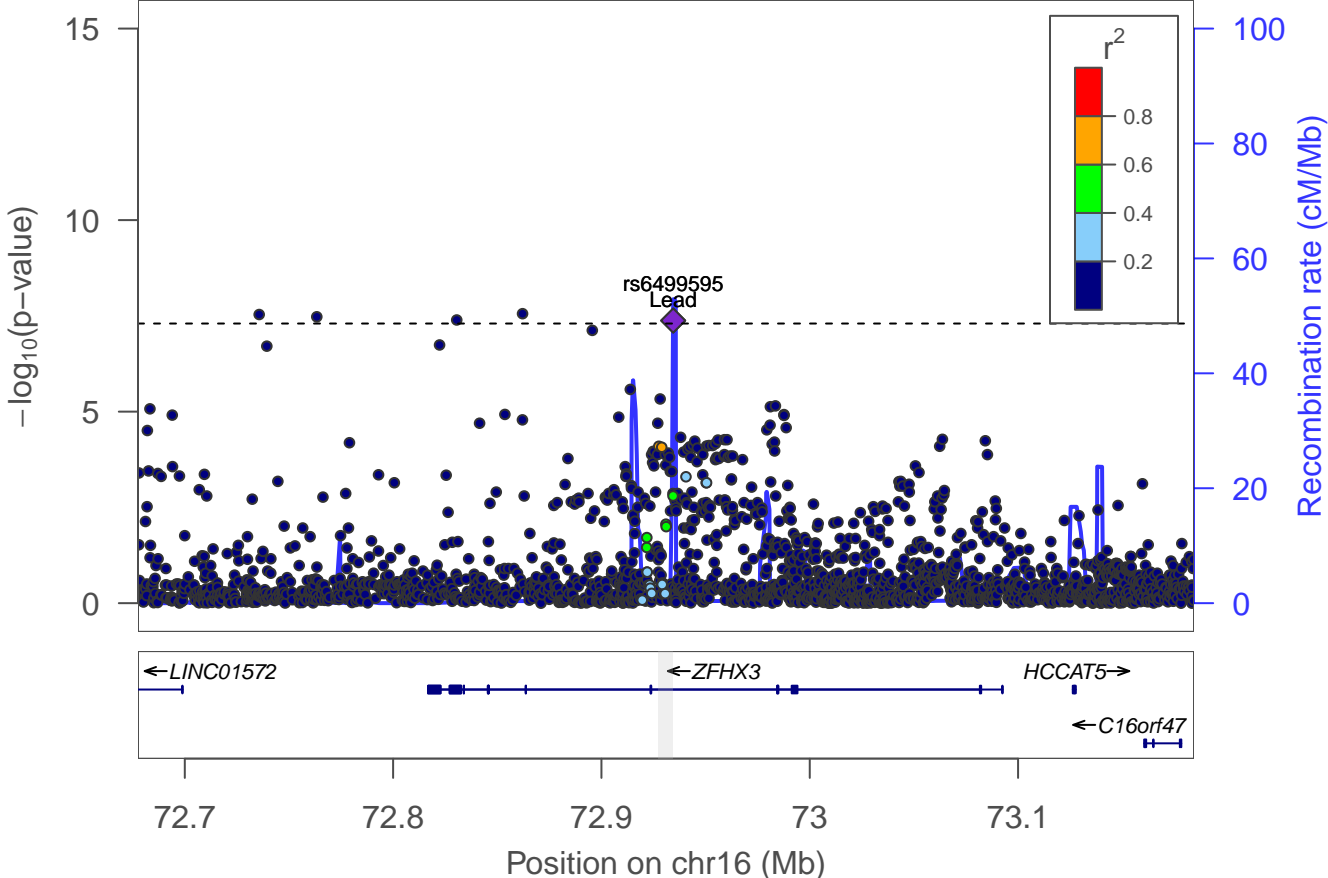

# First PC risky behaviors: Locus 82 [chr 17: 44.059–44.865Mb]

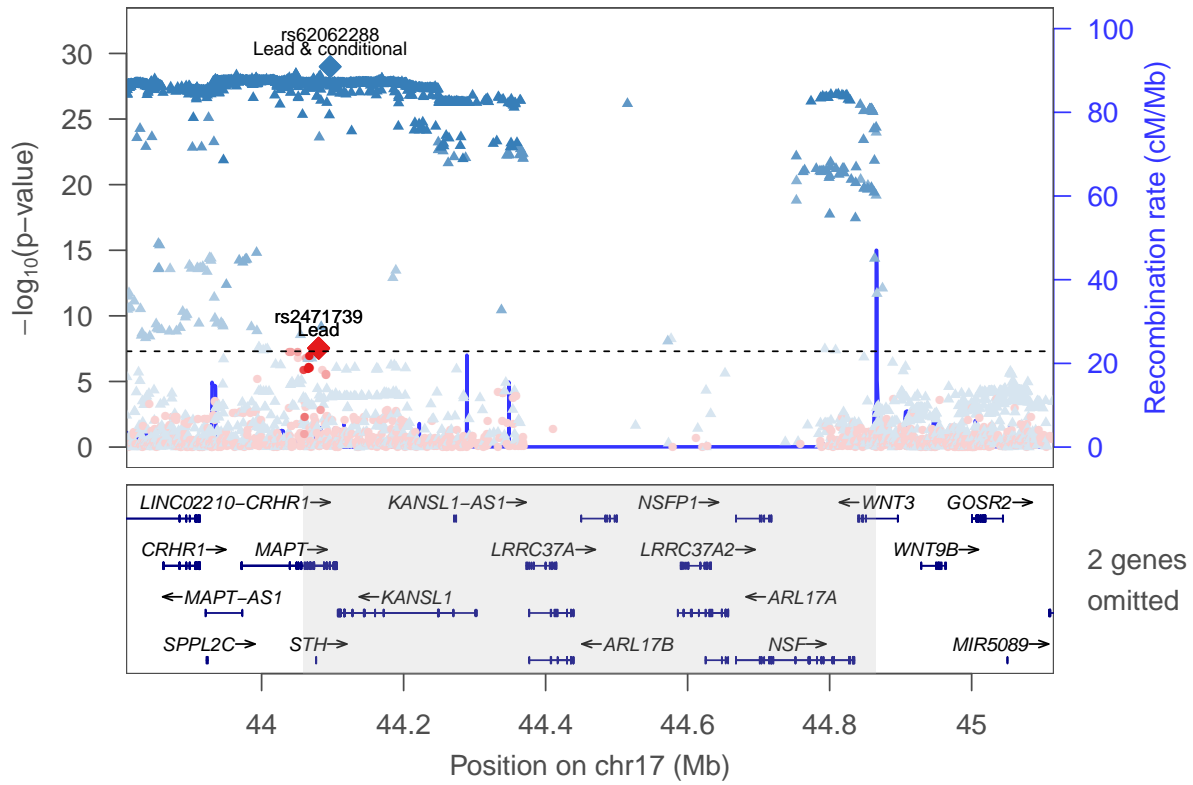

rs62062288 ▲  
rs2471739 ●

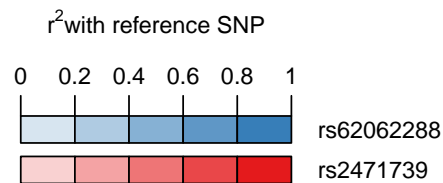

# First PC risky behaviors: locus 83 [chr 17:65.876–65.985Mb]

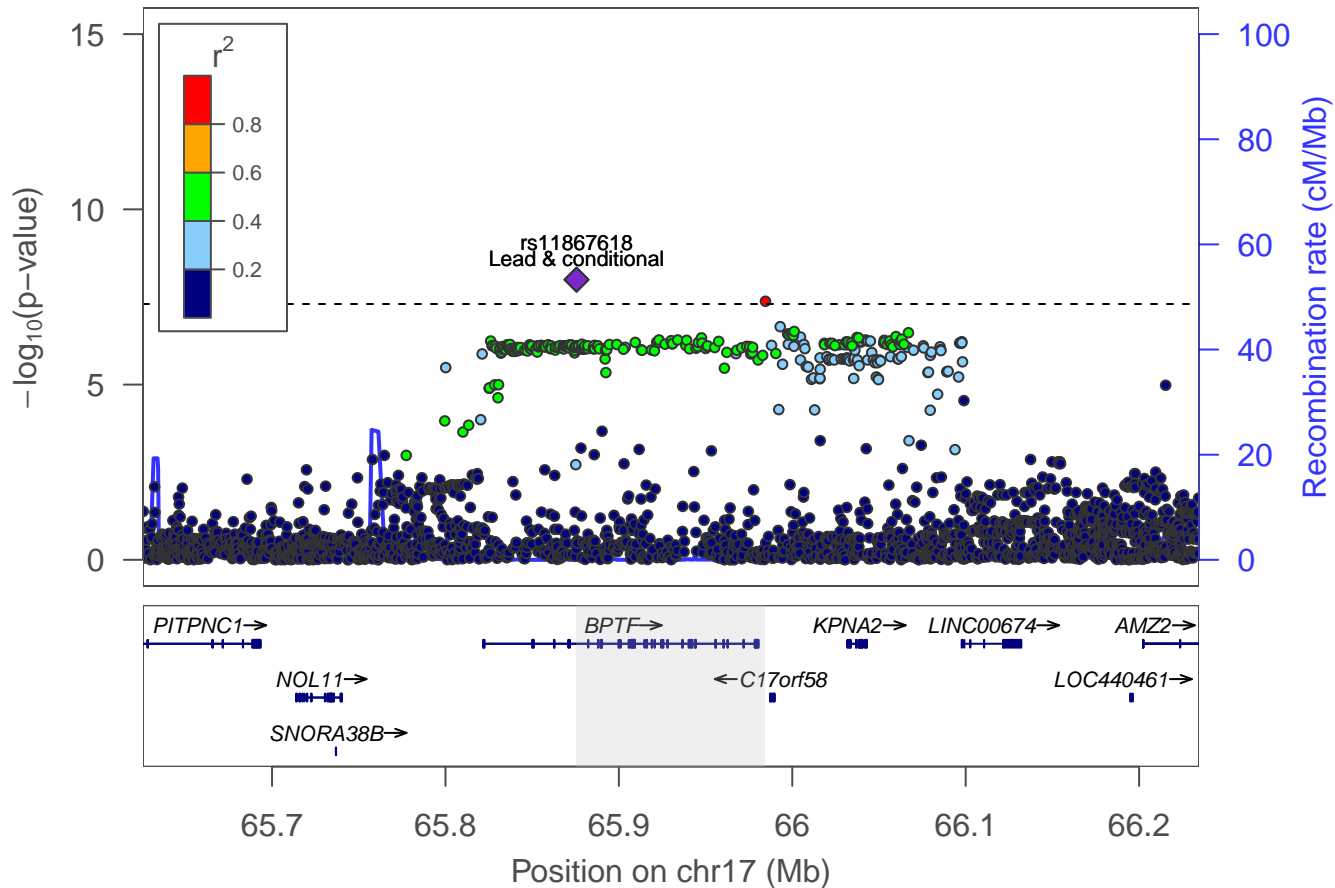

# First PC risky behaviors: locus 84 [chr 17:77.769–77.801Mb]

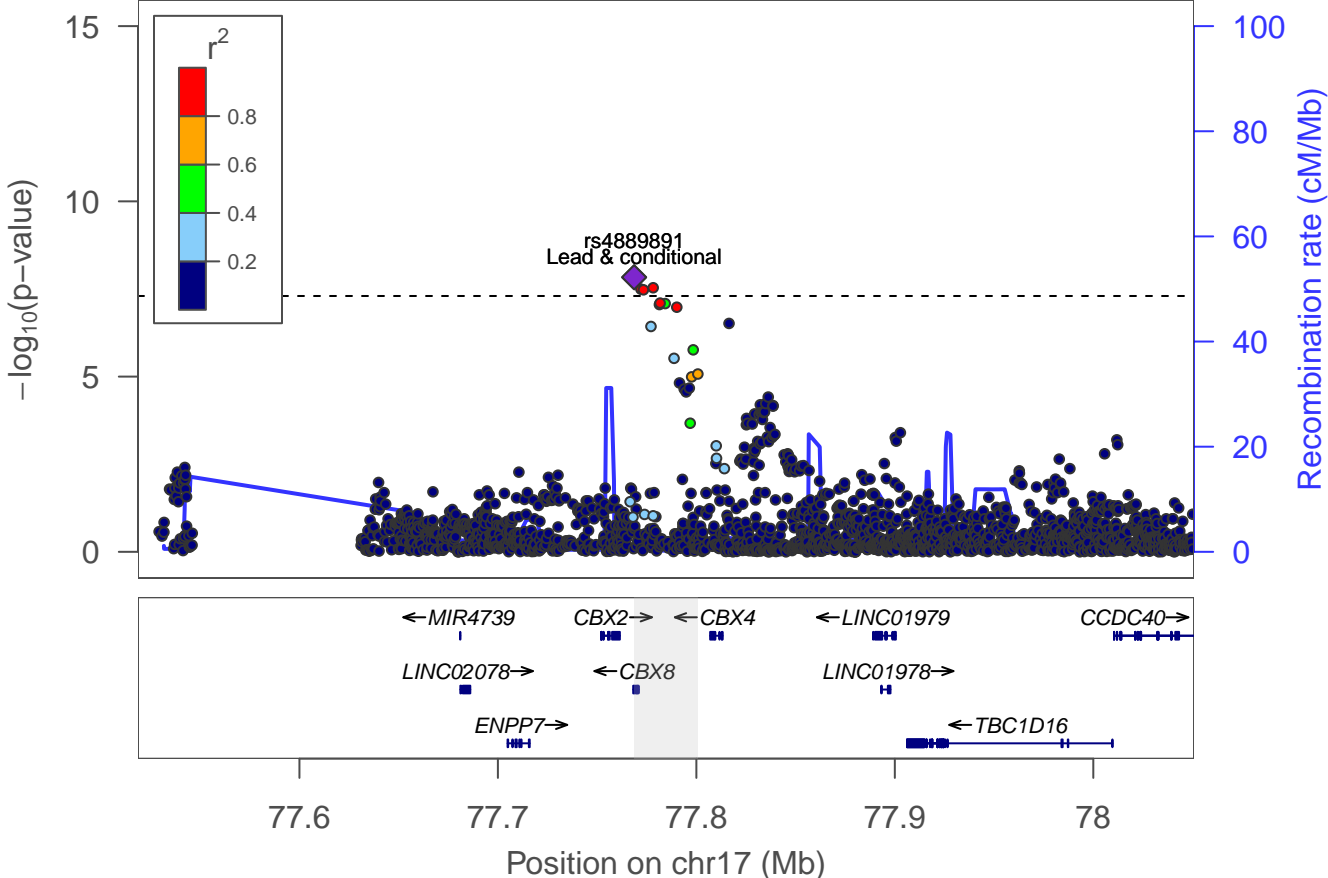

# First PC risky behaviors: locus 85 [chr 17:79.409–79.427Mb]

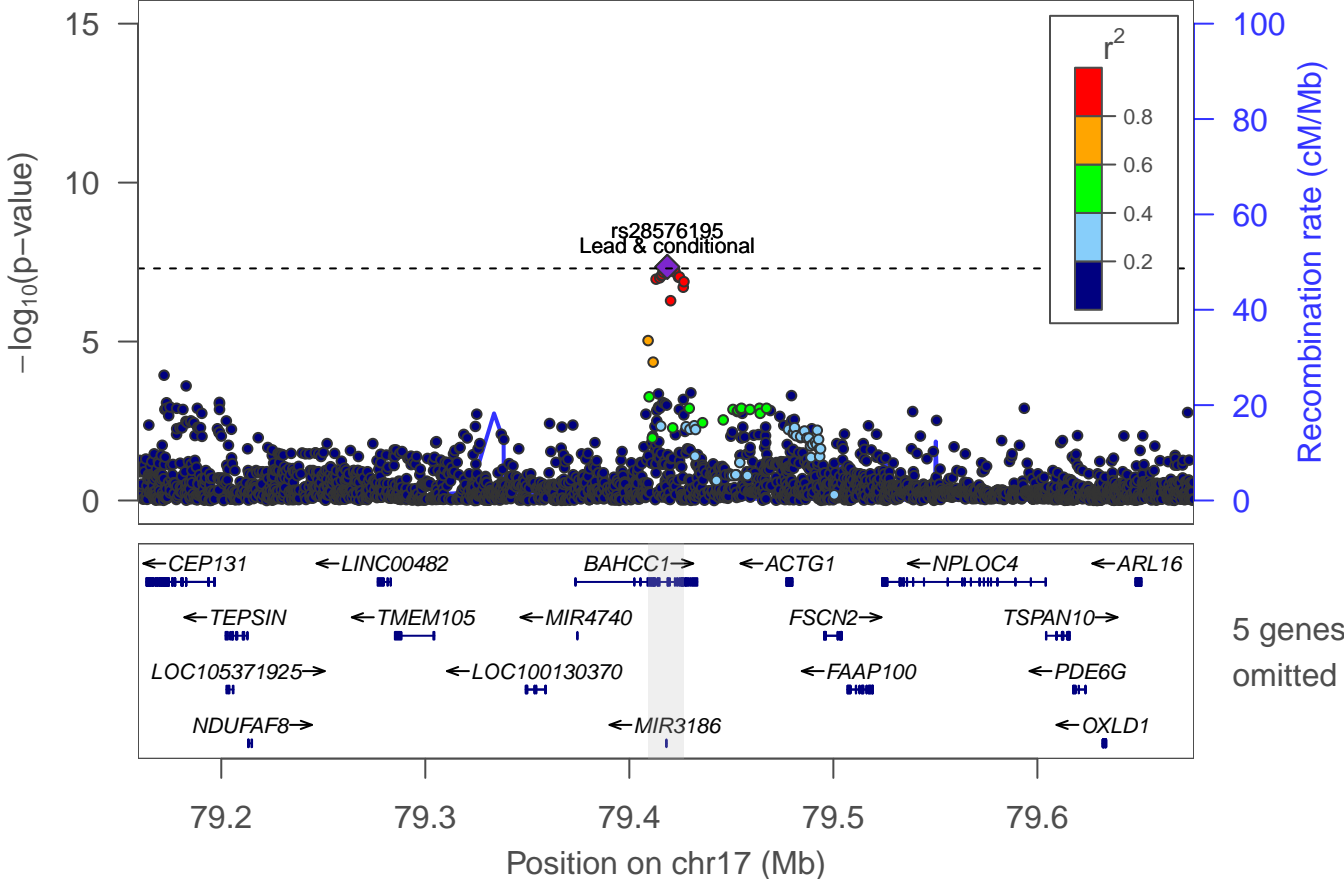

# First PC risky behaviors: locus 86 [chr 18:8.368–8.399Mb]

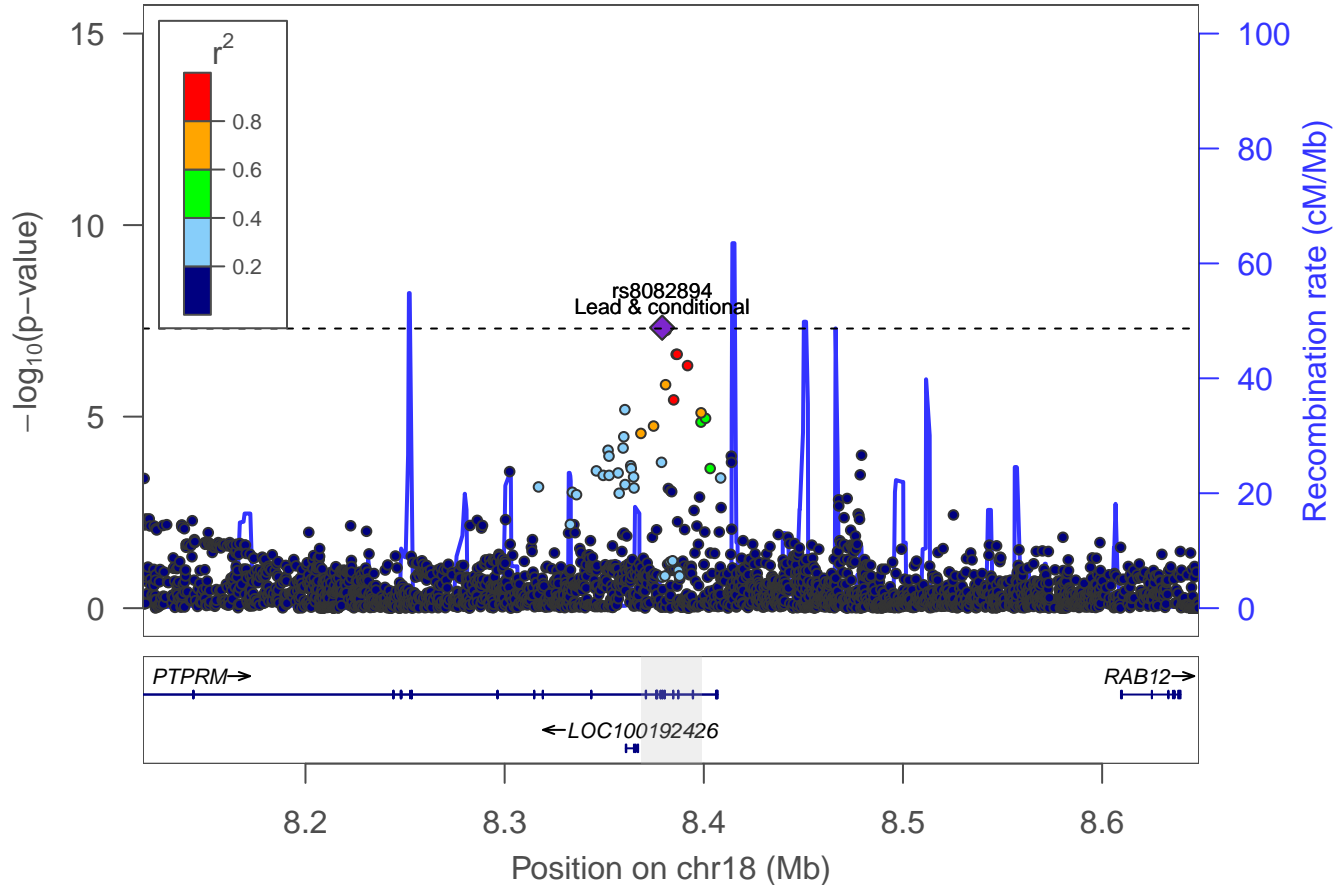

# First PC risky behaviors: locus 87 [chr 18:49.965–50.018Mb]

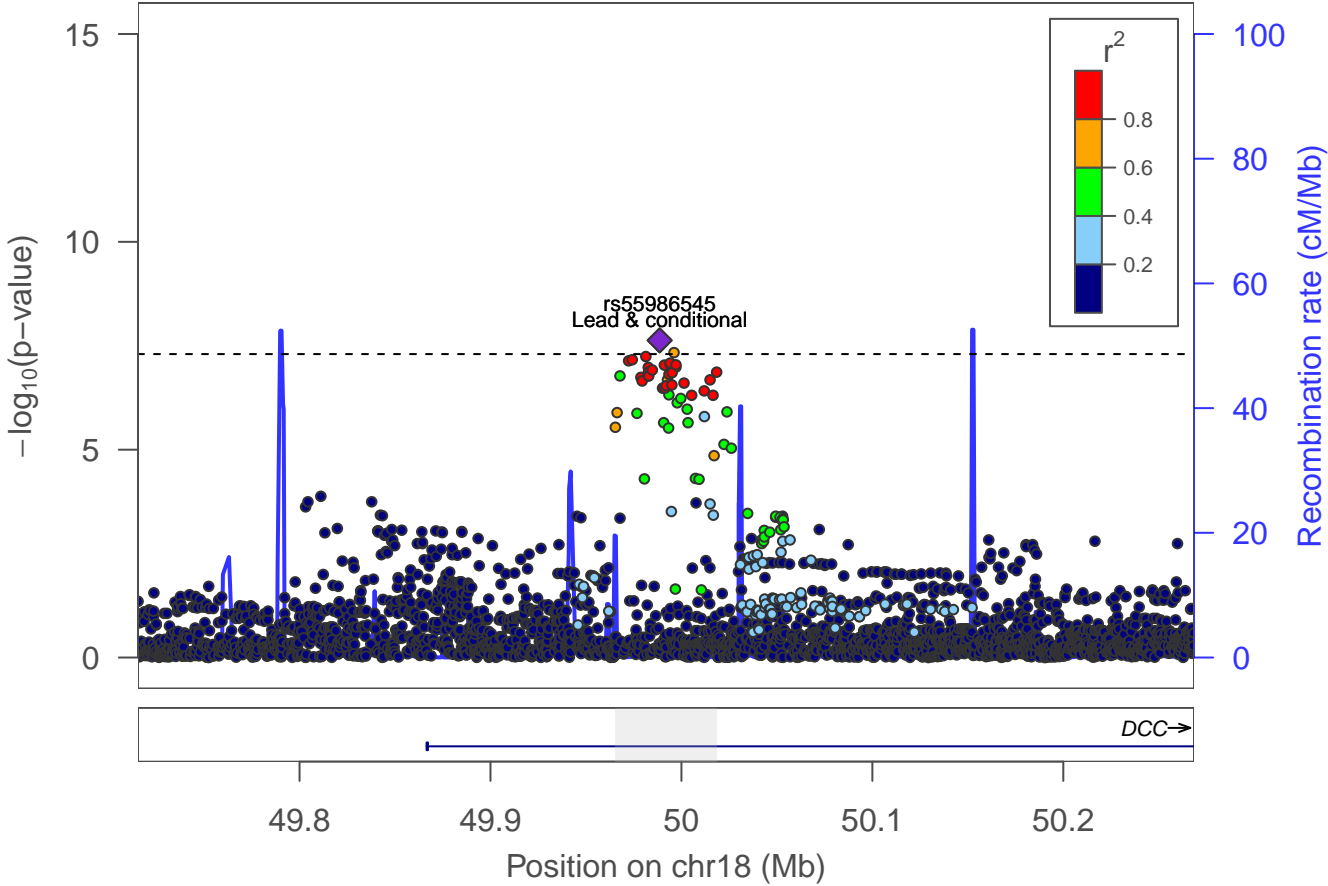

# First PC risky behaviors: Locus 88 [chr 18: 52.972–53.183Mb]

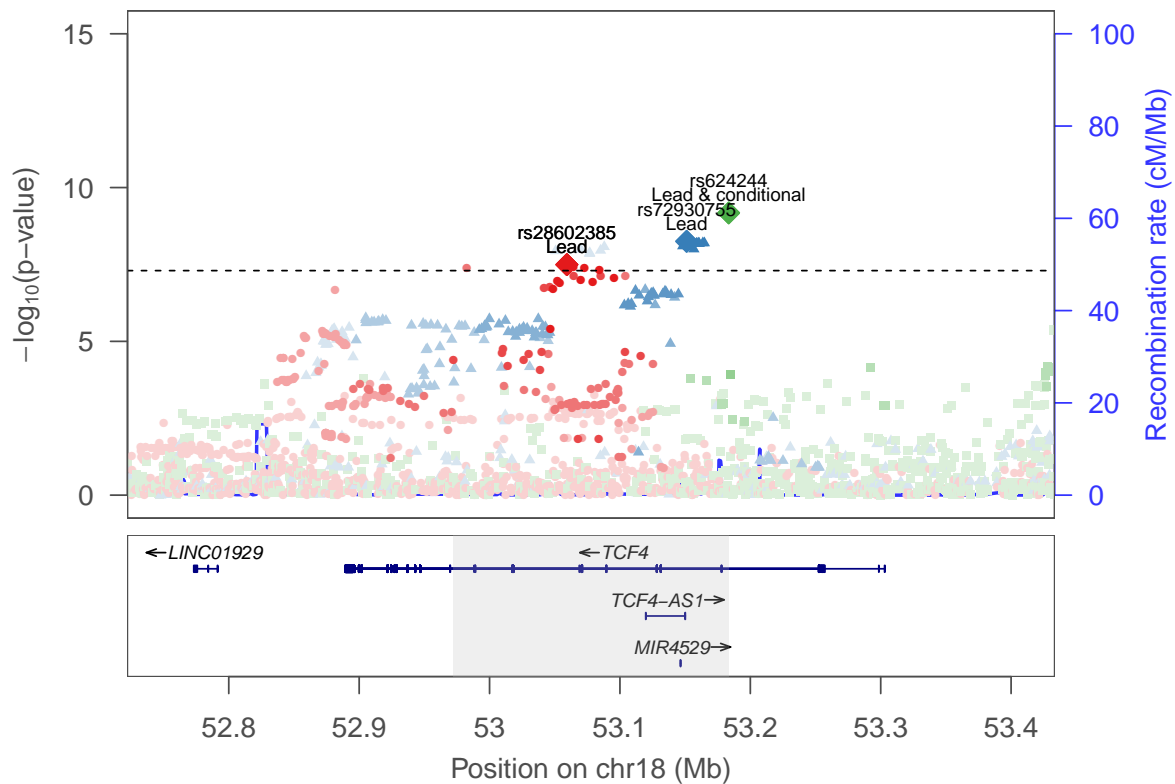

rs624244 ■  
 rs72930755 ▲  
 rs28602385 ●

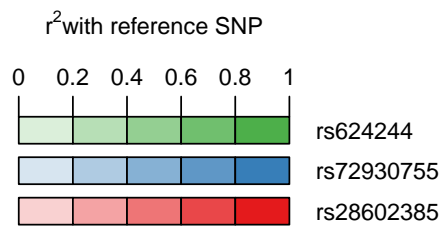



# First PC risky behaviors: locus 89 [chr 22:42.692–42.703Mb]

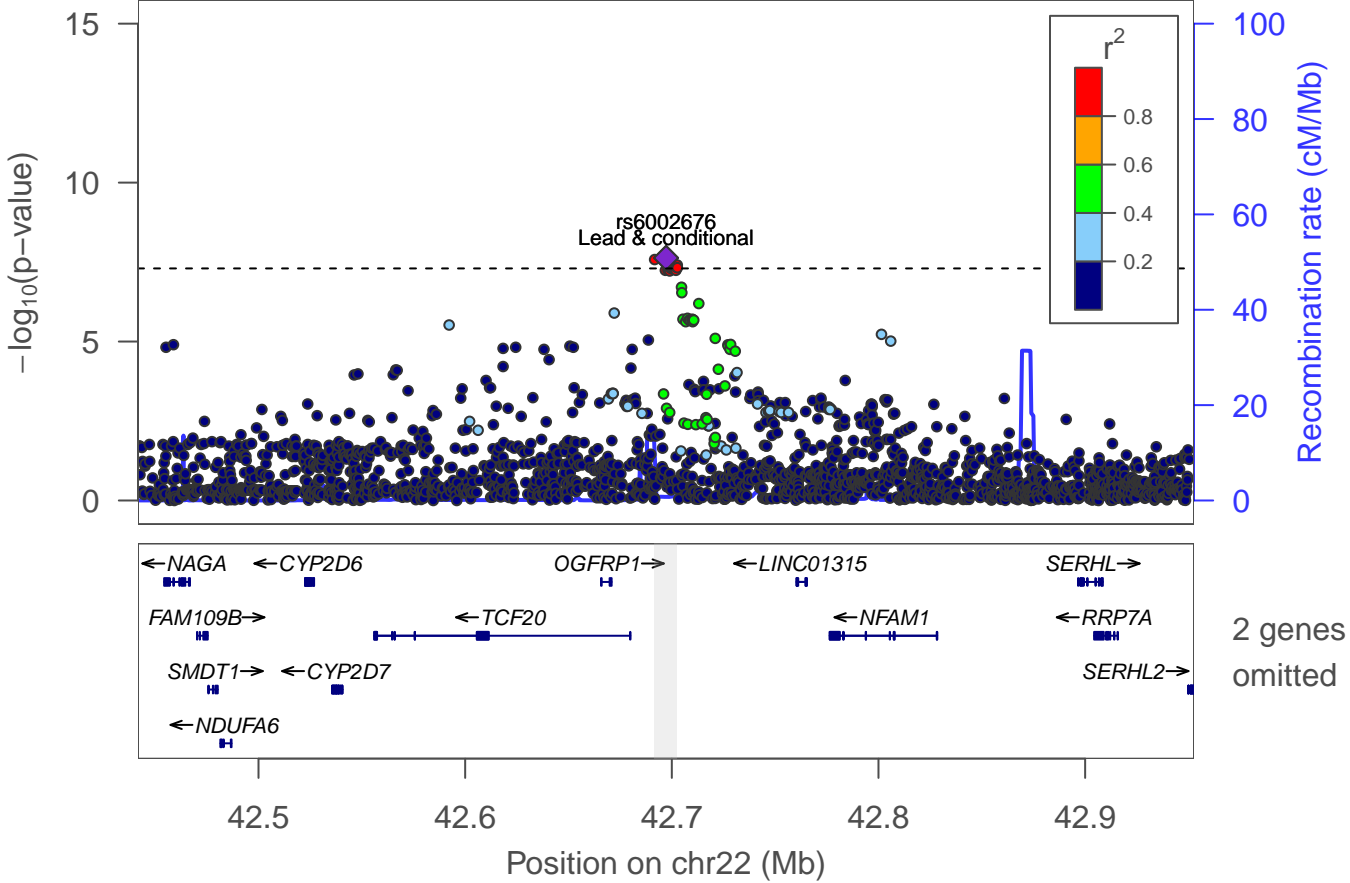

Supplement: NIHMS1046638-supplement-Supplementary_Data_1.pdf [file NIHMS1046638-supplement-Supplementary_Data_1.pdf]
